# Supplementary material for: TAZ-CAMTA1 and YAP-TFE3 alter the TAZ/YAP transcriptome by recruiting the ATAC histone acetyltransferase complex
Source: eLife. 2021 Apr 29;10:e62857. doi: 10.7554/eLife.62857 (PMC8143797; doi:10.7554/eLife.62857)
Supplement: Figure 2—source data 1. [file elife-62857-fig2-data1.xlsx]

## Sheet: Sheet1
MISSION shRNA name	TRCN#	Oligo sequence (5'->3')
shTead#1	TRCN0000374164	CCGGGTGTATTTGAAGTCTCGAATACTCGAGTATTCGAGACTTCAAATACACTTTTTG
shTead#2	TRCN0000085865	CCGGGCTCGCCAATGTGTGAATATACTCGAGTATATTCACACATTGGCGAGCTTTTTG
shTead#3	TRCN0000304525	CCGGTCAAATTCTGGGCGGACTTAACTCGAGTTAAGTCCGCCCAGAATTTGATTTTTG
shTead#4	TRCN0000301799	CCGGGCTTGGTTGAACTATCCTAATCTCGAGATTAGGATAGTTCAACCAAGCTTTTTG
shTead#5	TRCN0000085867	CCGGCAGAAGGAAATCTCGTGATTTCTCGAGAAATCACGAGATTTCCTTCTGTTTTTG
