# Supplementary material for: TAZ-CAMTA1 and YAP-TFE3 alter the TAZ/YAP transcriptome by recruiting the ATAC histone acetyltransferase complex
Source: eLife. 2021 Apr 29;10:e62857. doi: 10.7554/eLife.62857 (PMC8143797; doi:10.7554/eLife.62857)
Supplement: Figure 4—source data 1. [file elife-62857-fig4-data1.xlsx]

## Sheet: YAP5SA.ChIP.AME.Enrichment
rank	motif_ID	consensus	p-value	adj_p-value	E-value	tests	FASTA_max	pos	neg	PWM_min	TP	%TP	FP	%FP
1	TEAD4_HUMAN.H11MO.0.A	RCATTCCWGRVAK	6.81e-421	2.57e-417	3.35e-414	3773	3469	3469	3469	1.8	2397	69.1	630	18.16
2	TEAD1_HUMAN.H11MO.0.A	RCATTCCWGSCW	1.42e-389	4.96e-386	6.46e-383	3489	3469	3469	3469	1.24	2484	71.61	768	22.14
3	TEAD2_HUMAN.H11MO.0.D	HYACATTCCWGG	1.66e-365	4.76e-362	6.20e-359	2867	3469	3469	3469	1.26	2132	61.46	520	14.99
4	JUN_HUMAN.H11MO.0.A	DRTGAGTCAYH	1.33e-207	2.68e-204	3.5e-201	2024	3469	3469	3469	1.62	1371	39.52	307	8.85
5	FOS_HUMAN.H11MO.0.A	VTGAGTCAB	1.11e-206	2.85e-203	3.71e-200	2572	3469	3469	3469	2.38	1373	39.58	310	8.94
6	FOSL2_HUMAN.H11MO.0.A	NDRTGAGTCAYH	8.43e-204	1.49e-200	1.94e-197	1771	3469	3469	3469	1.07	1422	40.99	346	9.97
7	FOSL1_HUMAN.H11MO.0.A	KRVTGAGTCAYH	8.63e-204	1.57e-200	2.04e-197	1819	3469	3469	3469	1.21	1414	40.76	341	9.83
8	JUND_HUMAN.H11MO.0.A	RRTGAGTCAYY	7.22e-188	1.56e-184	2.03e-181	2157	3469	3469	3469	2.3	1251	36.06	274	7.9
9	FOSB_HUMAN.H11MO.0.A	RTGAGTCAB	6.19e-186	1.78e-182	2.32e-179	2877	3469	3469	3469	3.36	1347	38.83	336	9.69
10	JUNB_HUMAN.H11MO.0.A	DVTGAGTCABH	5.68e-183	1.31e-179	1.71e-176	2311	3469	3469	3469	1.08	1680	48.43	573	16.52
11	ETV6_HUMAN.H11MO.0.D	RCAGGAARK	1.71e-126	7.83e-123	1.02e-119	4573	3469	3469	3469	1.62	2315	66.73	1327	38.25
12	ETV4_HUMAN.H11MO.0.B	VRCAGGAARBR	6.94e-112	2.99e-108	3.9e-105	4317	3469	3469	3469	1.66	2170	62.55	1240	35.75
13	BATF_HUMAN.H11MO.1.A	DATGAYKCAAH	3.53e-100	8.27e-97	1.08e-93	2341	3469	3469	3469	2.06	1166	33.61	432	12.45
14	ETV5_HUMAN.H11MO.0.C	RRRSAGGAARDGRV	3.4e-99	1.48e-95	1.93e-92	4357	3469	3469	3469	2.28	1848	53.27	988	28.48
15	ZN394_HUMAN.H11MO.1.D	GAAWGGAAW	1.03e-94	4.38e-91	5.7e-88	4245	3469	3469	3469	1.02	2535	73.08	1702	49.06
16	ERG_HUMAN.H11MO.0.A	RRRSAGGAAGYGG	9.17e-88	2.55e-84	3.32e-81	2786	3469	3469	3469	1.03	1796	51.77	990	28.54
17	ETV7_HUMAN.H11MO.0.D	VAGGAAR	3.59e-81	1.63e-77	2.12e-74	4543	3469	3469	3469	1.3	2450	70.63	1674	48.26
18	ETV2_HUMAN.H11MO.0.B	RRARRCAGGAARYRGS	4.2e-79	6.99e-76	9.1e-73	1664	3469	3469	3469	1.17	1127	32.49	474	13.66
19	FLI1_HUMAN.H11MO.1.A	RRRCAGGAAGBRG	8.39e-79	2.27e-75	2.96e-72	2706	3469	3469	3469	1.05	1721	49.61	963	27.76
20	ETS2_HUMAN.H11MO.0.B	RDVRGGAARVRRR	2.86e-76	1.29e-72	1.67e-69	4502	3469	3469	3469	2.34	1762	50.79	1012	29.17
21	VEZF1_HUMAN.H11MO.0.C	GGRRRRGRRGGAGGGGGRGRRR	1.98e-73	6.1e-70	7.94e-67	3083	3469	3469	3469	4.54	1348	38.86	668	19.26
22	FLI1_HUMAN.H11MO.0.A	SRRGGMAGGAAGGRRRGR	7.41e-73	1.93e-69	2.51e-66	2605	3469	3469	3469	1.43	1514	43.64	809	23.32
23	ETS1_HUMAN.H11MO.0.A	RRRCMGGAAGTGG	1.06e-72	2.24e-69	2.91e-66	2109	3469	3469	3469	1.11	1354	39.03	676	19.49
24	BACH2_HUMAN.H11MO.0.A	TGCTGAGTCAB	2.82e-72	5.29e-69	6.89e-66	1877	3469	3469	3469	1.23	1179	33.99	539	15.54
25	IRF3_HUMAN.H11MO.0.B	RAAARGGAAAVDGAAASDGA	5.89e-71	1.39e-67	1.8e-64	2352	3469	3469	3469	1.22	1478	42.61	787	22.69
26	MAZ_HUMAN.H11MO.0.A	GGGGGAGGGGGDGRGRRRGRRG	2.38e-68	6.64e-65	8.64e-62	2791	3469	3469	3469	3.01	1426	41.11	755	21.76
27	NFAT5_HUMAN.H11MO.0.D	RRRGGAARRDN	3.55e-68	1.66e-64	2.15e-61	4656	3469	3469	3469	2.49	1775	51.17	1064	30.67
28	EGR2_HUMAN.H11MO.0.A	GRGRRKGWGKGGGHGGRG	3.92e-67	1.06e-63	1.39e-60	2717	3469	3469	3469	2.21	1357	39.12	703	20.27
29	E2F7_HUMAN.H11MO.0.B	GDGGCGGGAARDR	1.34e-66	3.87e-63	5.04e-60	2896	3469	3469	3469	1.71	1414	40.76	753	21.71
30	BC11A_HUMAN.H11MO.0.A	RAAAGAGGAAGTGARAV	1.21e-66	4.67e-63	6.08e-60	3855	3469	3469	3469	1.28	2098	60.48	1383	39.87
31	ZBT17_HUMAN.H11MO.0.A	SRRGGWGGGGGAGGGGMRR	8.43e-63	2.92e-59	3.8e-56	3458	3469	3469	3469	3.14	1499	43.21	844	24.33
32	NFAC1_HUMAN.H11MO.0.B	AWGGAAARWVWGAMW	1.71e-62	6.63e-59	8.63e-56	3870	3469	3469	3469	1.52	1856	53.5	1170	33.73
33	PATZ1_HUMAN.H11MO.0.C	GGGGMGGGGGMKGGRRVGGVRG	1.14e-61	3.07e-58	3.99e-55	2696	3469	3469	3469	1.53	1579	45.52	920	26.52
34	WT1_HUMAN.H11MO.0.C	RGGVGGGGGAGGRGGVGGRG	6.98e-61	1.32e-57	1.72e-54	1894	3469	3469	3469	1.28	1228	35.4	626	18.05
35	FOXG1_HUMAN.H11MO.0.D	DTTGTTTAYDTWTDTTT	1.19e-60	2.15e-57	2.79e-54	1804	3469	3469	3469	1.32	1090	31.42	518	14.93
36	ZN467_HUMAN.H11MO.0.C	GGGGAGGGGRRGGRGRRGGRRR	1.6e-60	3.04e-57	3.95e-54	1893	3469	3469	3469	5.43	893	25.74	372	10.72
37	ZN770_HUMAN.H11MO.0.C	GGGAGGCYGAGGBRGGAGGATC	3.53e-60	5.73e-57	7.46e-54	1622	3469	3469	3469	4.13	779	22.46	294	8.48
38	KLF15_HUMAN.H11MO.0.A	RGGGMGGRGVDGGGGGRGG	2.45e-59	4.87e-56	6.34e-53	1992	3469	3469	3469	1.45	1218	35.11	625	18.02
39	EGR2_HUMAN.H11MO.1.A	GRDGHGKGGGHGGRGG	3.66e-59	8.34e-56	1.09e-52	2280	3469	3469	3469	1.22	1400	40.36	777	22.4
40	FOXP1_HUMAN.H11MO.0.A	TBTGTTTMY	2.67e-59	8.4e-56	1.09e-52	3149	3469	3469	3469	1.09	1832	52.81	1165	33.58
41	ELF5_HUMAN.H11MO.0.A	VGRASSAGGAAGTRV	8.43e-59	1.83e-55	2.38e-52	2166	3469	3469	3469	1.04	1392	40.13	772	22.25
42	ZN341_HUMAN.H11MO.0.C	GRGGRRRRGGRGRRGGAASAGC	3.09e-58	9.01e-55	1.17e-51	2917	3469	3469	3469	4.62	1143	32.95	570	16.43
43	STAT1_HUMAN.H11MO.1.A	RRRAAAADGAAASTRAAAV	6.08e-58	1.31e-54	1.71e-51	2154	3469	3469	3469	1.1	1374	39.61	761	21.94
44	EGR1_HUMAN.H11MO.0.A	VDRDGCGKGGGYGGRRR	8.53e-57	2.2e-53	2.87e-50	2584	3469	3469	3469	2.67	1112	32.06	552	15.91
45	NFE2_HUMAN.H11MO.0.A	VVRTGACTCAGCA	6.86e-56	9.89e-53	1.29e-49	1442	3469	3469	3469	1.83	744	21.45	285	8.22
46	KLF6_HUMAN.H11MO.0.A	GSRRGGGHGGGGMHGGGRV	1.3e-55	3.79e-52	4.94e-49	2923	3469	3469	3469	1.45	1645	47.42	1012	29.17
47	RUNX1_HUMAN.H11MO.0.A	BYTGTGGTTWB	2.83e-55	5.89e-52	7.67e-49	2085	3469	3469	3469	1.51	1126	32.46	570	16.43
48	RUNX2_HUMAN.H11MO.0.A	KGKYTGTGGTTTKK	1.65e-54	4.39e-51	5.72e-48	2666	3469	3469	3469	1.63	1318	37.99	731	21.07
49	CPEB1_HUMAN.H11MO.0.D	TTTTTATTYTTTTTTTT	1.37e-51	1.2e-48	1.56e-45	872	3469	3469	3469	2.21	517	14.9	154	4.44
50	FOXK1_HUMAN.H11MO.0.A	TGTTTMCHTT	3.73e-52	1.23e-48	1.6e-45	3286	3469	3469	3469	1.64	1403	40.44	816	23.52
51	RUNX3_HUMAN.H11MO.0.A	BYTGTGGTTW	3.89e-51	8.03e-48	1.04e-44	2064	3469	3469	3469	6.73	530	15.28	163	4.7
52	NF2L2_HUMAN.H11MO.0.A	WWYTGCTGAGTCAT	1.24e-50	9.88e-48	1.29e-44	798	3469	3469	3469	1.07	594	17.12	204	5.88
53	SP4_HUMAN.H11MO.0.A	SRGVARGRGGCGGRGCHDRR	5.14e-51	1.33e-47	1.73e-44	2582	3469	3469	3469	1.35	1486	42.84	895	25.8
54	TAF1_HUMAN.H11MO.0.A	RARRWGGCGGMGGMGR	4.76e-50	1.19e-46	1.55e-43	2507	3469	3469	3469	1.35	1341	38.66	774	22.31
55	ELF2_HUMAN.H11MO.0.C	RAVCCGGAAGTGR	7.66e-50	1.23e-46	1.61e-43	1611	3469	3469	3469	1.05	1051	30.3	536	15.45
56	PRDM6_HUMAN.H11MO.0.C	RRRARGAAAAAAA	5.37e-49	1.86e-45	2.43e-42	3469	3469	3469	3469	2.26	1447	41.71	872	25.14
57	ELF3_HUMAN.H11MO.0.A	RAABVAGGAAGTRR	2.37e-48	4.3e-45	5.59e-42	1814	3469	3469	3469	1.03	1172	33.78	641	18.48
58	ETV1_HUMAN.H11MO.0.A	SRCCGGAAGYG	7.89e-48	1.23e-44	1.6e-41	1562	3469	3469	3469	1.05	1016	29.29	518	14.93
59	BACH1_HUMAN.H11MO.0.A	TGCTGAGTCABSS	8.6e-48	1.51e-44	1.96e-41	1755	3469	3469	3469	1.04	1138	32.8	616	17.76
60	ZN263_HUMAN.H11MO.0.A	GGGAGGAGGRRGRGGRGGRR	1.47e-47	3.23e-44	4.2e-41	2195	3469	3469	3469	1.84	1190	34.3	660	19.03
61	ZN394_HUMAN.H11MO.0.C	NRARWRGAAWNGAMWGRAAK	1.04e-47	3.77e-44	4.91e-41	3635	3469	3469	3469	1.92	1477	42.58	906	26.12
62	FOXA1_HUMAN.H11MO.0.A	TGTTTACWYWGB	1.76e-46	2.62e-43	3.41e-40	1486	3469	3469	3469	1.63	808	23.29	366	10.55
63	HMGA1_HUMAN.H11MO.0.D	NWATTTT	5.1e-46	1.67e-42	2.17e-39	3262	3469	3469	3469	2.09	858	24.73	405	11.67
64	SP4_HUMAN.H11MO.1.A	GRRRGGGGMGGGGCBK	2.1e-45	4.27e-42	5.56e-39	2038	3469	3469	3469	3.53	841	24.24	395	11.39
65	FOXJ2_HUMAN.H11MO.0.C	TGTTTRTTTW	1.03e-44	1.54e-41	2e-38	1497	3469	3469	3469	2.2	769	22.17	345	9.95
66	FEV_HUMAN.H11MO.0.B	GCVGGAAGYG	1.03e-44	4.16e-41	5.42e-38	4027	3469	3469	3469	1.54	1606	46.3	1041	30.01
67	TBX15_HUMAN.H11MO.0.D	GGGGGGGGGGGGGTGGGDR	6.68e-44	1.39e-40	1.81e-37	2080	3469	3469	3469	5.04	885	25.51	435	12.54
68	PURA_HUMAN.H11MO.0.D	GGWRKKGGDGGGCVKGG	1.85e-43	5.39e-40	7.02e-37	2915	3469	3469	3469	2.73	1185	34.16	678	19.54
69	E2F3_HUMAN.H11MO.0.A	DDGGCGGGAAA	2.02e-43	6.62e-40	8.62e-37	3285	3469	3469	3469	2.04	1231	35.49	717	20.67
70	PEBB_HUMAN.H11MO.0.C	TYTGTGGTYWB	6.57e-43	1.6e-39	2.08e-36	2434	3469	3469	3469	3.08	802	23.12	377	10.87
71	ELF1_HUMAN.H11MO.0.A	VRACCCGGAAGTGS	1.41e-42	2.01e-39	2.62e-36	1423	3469	3469	3469	1.17	886	25.54	442	12.74
72	FOXF1_HUMAN.H11MO.0.D	WTGTTTATTTW	4.56e-42	5.86e-39	7.63e-36	1285	3469	3469	3469	1.14	829	23.9	401	11.56
73	ZN281_HUMAN.H11MO.0.A	RGGWGGGGGAGGGGV	8.37e-42	1.45e-38	1.89e-35	1734	3469	3469	3469	2.03	948	27.33	494	14.24
74	KLF3_HUMAN.H11MO.0.B	GGRGVDGGGCGGGGCYGGG	6.5e-41	1.2e-37	1.56e-34	1839	3469	3469	3469	2.15	960	27.67	508	14.64
75	FOXD3_HUMAN.H11MO.0.D	KBTGTTTNCWTWRBH	4.59e-41	1.67e-37	2.17e-34	3631	3469	3469	3469	1.59	1454	41.91	926	26.69
76	KLF16_HUMAN.H11MO.0.D	GGGGGYGKGKBGGGGGGGG	1.57e-40	3.16e-37	4.11e-34	2015	3469	3469	3469	6.72	728	20.99	333	9.6
77	MAFK_HUMAN.H11MO.1.A	TGCTGAGTCAGCA	4.51e-40	7.75e-37	1.01e-33	1719	3469	3469	3469	2.01	762	21.97	360	10.38
78	RXRA_HUMAN.H11MO.0.A	VRGDVRGNVARAGGTCARRG	5.05e-40	1.89e-36	2.46e-33	3739	3469	3469	3469	2.62	1368	39.43	856	24.68
79	EHF_HUMAN.H11MO.0.B	VWACSAGGAAGTDVS	2.13e-39	2.98e-36	3.87e-33	1399	3469	3469	3469	1.04	916	26.41	481	13.87
80	FOXA2_HUMAN.H11MO.0.A	TGTTTACWYWGB	2.38e-39	3.29e-36	4.29e-33	1381	3469	3469	3469	1.06	894	25.77	464	13.38
81	SOX10_HUMAN.H11MO.1.A	BBYCTTTGTTYYY	8.15e-40	3.35e-36	4.37e-33	4113	3469	3469	3469	1.82	1699	48.98	1160	33.44
82	KLF5_HUMAN.H11MO.0.A	WGGGTGKGGCDGGG	4.92e-39	1.27e-35	1.65e-32	2583	3469	3469	3469	8.54	658	18.97	289	8.33
83	FOXP2_HUMAN.H11MO.0.C	BTGTTTACH	6.29e-39	1.32e-35	1.72e-32	2097	3469	3469	3469	1.04	1278	36.84	784	22.6
84	SP2_HUMAN.H11MO.0.A	GGSSVGGGGGCGGGGCCDGSGS	1.25e-38	2.19e-35	2.85e-32	1759	3469	3469	3469	1.44	1061	30.59	602	17.35
85	ZSC22_HUMAN.H11MO.0.C	RGKCWGAGGGMGGAGG	1.35e-38	2.44e-35	3.18e-32	1808	3469	3469	3469	2.06	884	25.48	460	13.26
86	E2F4_HUMAN.H11MO.0.A	SRGGGCGGGAARD	4.34e-38	5.99e-35	7.8e-32	1381	3469	3469	3469	1.05	896	25.83	472	13.61
87	GABPA_HUMAN.H11MO.0.A	GVVRCCGGAAGTGV	1.2e-37	1.31e-34	1.7e-31	1091	3469	3469	3469	1.81	543	15.65	215	6.2
88	TFDP1_HUMAN.H11MO.0.C	RRRRGGCGGGAARN	6.25e-37	1.28e-33	1.66e-30	2045	3469	3469	3469	1.27	1133	32.66	672	19.37
89	FOXM1_HUMAN.H11MO.0.A	TGTTTRCTYWKB	8.48e-37	2.26e-33	2.94e-30	2662	3469	3469	3469	1.1	1499	43.21	995	28.68
90	FOXO1_HUMAN.H11MO.0.A	KBBYTGTTTHCN	1.26e-36	4.49e-33	5.85e-30	3568	3469	3469	3469	1.54	1513	43.61	1009	29.09
91	ZN770_HUMAN.H11MO.1.C	DGGAGGCYGRG	2.93e-36	4.91e-33	6.39e-30	1677	3469	3469	3469	24.2	339	9.77	93	2.68
92	SP3_HUMAN.H11MO.0.B	SGVVGGGGGCGGGGCBRGSS	2.38e-36	5.65e-33	7.36e-30	2380	3469	3469	3469	2.63	1117	32.2	662	19.08
93	FOXF2_HUMAN.H11MO.0.D	TGTTTACHTWD	5.71e-36	7.39e-33	9.62e-30	1294	3469	3469	3469	1.2	771	22.23	386	11.13
94	ELK1_HUMAN.H11MO.0.B	RCCGGAAGTGV	1.27e-35	1.24e-32	1.62e-29	981	3469	3469	3469	1.04	664	19.14	308	8.88
95	NFKB1_HUMAN.H11MO.0.A	AGGGAAAK	3.4e-36	1.52e-32	1.97e-29	4467	3469	3469	3469	1.88	1811	52.21	1293	37.27
96	E2F6_HUMAN.H11MO.0.A	DGGGCGGGARRVR	8.13e-36	2.1e-32	2.73e-29	2577	3469	3469	3469	1.06	1521	43.85	1022	29.46
97	NF2L1_HUMAN.H11MO.0.C	HGTCATN	1.77e-35	5.22e-32	6.8e-29	2953	3469	3469	3469	1.26	1374	39.61	891	25.68
98	ZFX_HUMAN.H11MO.1.A	DGVRGVVSAGGCCKVGG	3.74e-35	1.15e-31	1.5e-28	3085	3469	3469	3469	2.02	1348	38.86	870	25.08
99	FUBP1_HUMAN.H11MO.0.D	TYGTNTTTTTTT	6.65e-35	1.38e-31	1.79e-28	2072	3469	3469	3469	2.17	785	22.63	402	11.59
100	PO3F3_HUMAN.H11MO.0.D	WWWAWTTATGCWWATTW	1.06e-34	2.1e-31	2.73e-28	1990	3469	3469	3469	1.33	1073	30.93	635	18.3
101	HSF1_HUMAN.H11MO.1.A	TTCTGGAAR	1.64e-34	4.51e-31	5.87e-28	2741	3469	3469	3469	1.02	1610	46.41	1114	32.11
102	VEZF1_HUMAN.H11MO.1.C	RRRRGGAGGGGR	1.06e-34	4.63e-31	6.02e-28	4378	3469	3469	3469	4.39	1201	34.62	744	21.45
103	ZFP82_HUMAN.H11MO.0.C	TTCCADTTCAYTAATTYTCTCTTC	6.47e-34	8.6e-31	1.12e-27	1329	3469	3469	3469	1.48	835	24.07	446	12.86
104	NFAC1_HUMAN.H11MO.1.B	AATGGAAAAW	6.24e-34	1.75e-30	2.28e-27	2814	3469	3469	3469	1.06	1631	47.02	1138	32.8
105	STAT2_HUMAN.H11MO.0.A	RRGRAAAHGAAACTGAAAV	2.72e-33	3.19e-30	4.15e-27	1171	3469	3469	3469	1.17	760	21.91	391	11.27
106	SP2_HUMAN.H11MO.1.B	RGGRGGCGGGGC	5.79e-33	1.11e-29	1.44e-26	1912	3469	3469	3469	2.92	785	22.63	412	11.88
107	MAZ_HUMAN.H11MO.1.A	RRGGGAGGGGS	7.73e-33	1.66e-29	2.16e-26	2148	3469	3469	3469	1.65	1130	32.57	695	20.03
108	ZN713_HUMAN.H11MO.0.D	RWAGAARAADGVSANGMAA	9.59e-33	2.28e-29	2.97e-26	2381	3469	3469	3469	1.12	1384	39.9	919	26.49
109	KLF1_HUMAN.H11MO.0.A	DGGGYGKGGCYGGG	2.12e-32	3.85e-29	5.01e-26	1813	3469	3469	3469	40.4	252	7.26	56	1.61
110	SALL4_HUMAN.H11MO.0.B	GSDGGGWGGG	1.17e-32	4.54e-29	5.92e-26	3877	3469	3469	3469	1.25	2050	59.09	1557	44.88
111	ELK4_HUMAN.H11MO.0.A	SVCCGGAAGTGV	1.33e-31	1.14e-28	1.48e-25	859	3469	3469	3469	1.03	588	16.95	271	7.81
112	HXD11_HUMAN.H11MO.0.D	DWTTTATKRHN	8.71e-32	2.22e-28	2.89e-25	2544	3469	3469	3469	1.03	1486	42.84	1019	29.37
113	FOXO3_HUMAN.H11MO.0.B	BYTGTTTACH	1.23e-31	2.22e-28	2.9e-25	1815	3469	3469	3469	1.02	1115	32.14	690	19.89
114	TBX1_HUMAN.H11MO.0.D	GGGYGGGYAGGGGTGGGMDD	1.67e-31	2.28e-28	2.97e-25	1363	3469	3469	3469	1.33	856	24.68	476	13.72
115	TBX21_HUMAN.H11MO.0.A	GDGDRGGTGTGRV	7.52e-32	3.16e-28	4.12e-25	4204	3469	3469	3469	1.39	1873	53.99	1387	39.98
116	FOXJ3_HUMAN.H11MO.0.A	TTGTTTATKKTTW	8.63e-31	6.64e-28	8.65e-25	770	3469	3469	3469	1.22	508	14.64	218	6.28
117	ANDR_HUMAN.H11MO.0.A	TGTTCTTKKYTGTTTRYW	7.09e-31	1.22e-27	1.59e-24	1717	3469	3469	3469	1.18	1010	29.12	606	17.47
118	BATF_HUMAN.H11MO.0.A	RBTYTCRDWATGASTCAB	8.99e-31	1.35e-27	1.76e-24	1502	3469	3469	3469	5.54	323	9.31	99	2.85
119	HXC10_HUMAN.H11MO.0.D	WWWWWWWNNWTTTWATKRC	1.29e-30	2.55e-27	3.32e-24	1981	3469	3469	3469	2.48	712	20.52	368	10.61
120	FOXJ3_HUMAN.H11MO.1.B	TKKTTWWTGTTTA	5.07e-30	3.73e-27	4.86e-24	736	3469	3469	3469	1.05	512	14.76	224	6.46
121	NFAC2_HUMAN.H11MO.0.B	TGGAAAAWY	5.33e-30	1.5e-26	1.95e-23	2813	3469	3469	3469	1.02	1637	47.19	1174	33.84
122	HXD12_HUMAN.H11MO.0.D	DDTTTTAHKRN	8.06e-30	2.1e-26	2.74e-23	2612	3469	3469	3469	1.13	1389	40.04	945	27.24
123	ZN148_HUMAN.H11MO.0.D	KGRGKGGGGGAGGGG	2.41e-29	5.01e-26	6.52e-23	2080	3469	3469	3469	3.66	886	25.54	513	14.79
124	ZN121_HUMAN.H11MO.0.C	CTGGGCAACABAGYRAGACC	1.6e-28	5.08e-26	6.62e-23	317	3469	3469	3469	197	97	2.8	1	0.03
125	ELK3_HUMAN.H11MO.0.D	VMCHGGAARTSC	8.69e-29	8.83e-26	1.15e-22	1016	3469	3469	3469	1.2	627	18.07	313	9.02
126	RARA_HUMAN.H11MO.1.A	VAGGTCAGRG	3.88e-29	1.22e-25	1.58e-22	3135	3469	3469	3469	5.2	648	18.68	327	9.43
127	NFAC4_HUMAN.H11MO.0.C	WGGAAAAYTW	1.88e-28	5.73e-25	7.46e-22	3046	3469	3469	3469	2.04	1234	35.57	816	23.52
128	SPIC_HUMAN.H11MO.0.D	KVDRRWGGGKDRG	3.5e-28	1.68e-24	2.19e-21	4804	3469	3469	3469	3.14	1014	29.23	627	18.07
129	FOXA3_HUMAN.H11MO.0.B	CHTGTTTACWTWG	1.33e-27	1.94e-24	2.53e-21	1460	3469	3469	3469	1.16	852	24.56	496	14.3
130	HAND1_HUMAN.H11MO.1.D	KSYCTGG	6.75e-28	3.2e-24	4.17e-21	4742	3469	3469	3469	1.34	2329	67.14	1886	54.37
131	TEAD3_HUMAN.H11MO.0.D	GAHATTYYWGCYBYW	2.26e-27	4.19e-24	5.46e-21	1854	3469	3469	3469	1.2	1031	29.72	647	18.65
132	IRF1_HUMAN.H11MO.0.A	RAAANWGAAASTGAAASYRR	8.5e-27	8.85e-24	1.15e-20	1041	3469	3469	3469	1.26	649	18.71	340	9.8
133	MEF2B_HUMAN.H11MO.0.A	DKKKCTATTTTTRG	4.9e-27	9e-24	1.17e-20	1837	3469	3469	3469	1.53	855	24.65	502	14.47
134	ZN554_HUMAN.H11MO.1.D	GCWGAGYCA	2.71e-27	9.01e-24	1.17e-20	3322	3469	3469	3469	1.02	1883	54.28	1435	41.37
135	SP1_HUMAN.H11MO.0.A	VGGGGGCGGGGCCKGGGGGGGG	7.16e-26	4.14e-23	5.38e-20	578	3469	3469	3469	1.66	404	11.65	167	4.81
136	COT1_HUMAN.H11MO.1.C	BSARAGGTCAGRG	4.24e-26	1.18e-22	1.54e-19	2786	3469	3469	3469	3.28	872	25.14	522	15.05
137	WT1_HUMAN.H11MO.1.B	GWGGGAGGAGS	2.95e-25	1.02e-21	1.32e-18	3447	3469	3469	3469	5.86	781	22.51	453	13.06
138	SUH_HUMAN.H11MO.0.A	VSYSTGGGAAV	3.63e-25	1.21e-21	1.57e-18	3323	3469	3469	3469	2.07	1154	33.27	770	22.2
139	MEF2A_HUMAN.H11MO.0.A	DKCTATTTTTRGM	8.85e-25	1.27e-21	1.66e-18	1439	3469	3469	3469	1.2	808	23.29	478	13.78
140	RORG_HUMAN.H11MO.0.C	RRAASTRGGTCA	8.76e-25	1.87e-21	2.43e-18	2132	3469	3469	3469	1.47	992	28.6	632	18.22
141	KLF4_HUMAN.H11MO.0.A	WGGGYGKGGC	1.25e-24	2.02e-21	2.63e-18	1609	3469	3469	3469	7.84	417	12.02	181	5.22
142	MAFF_HUMAN.H11MO.1.B	TGCTGASTC	7.46e-25	2.05e-21	2.67e-18	2743	3469	3469	3469	1.09	1495	43.1	1083	31.22
143	GATA3_HUMAN.H11MO.0.A	RVAGATAAVAD	8.99e-25	2.38e-21	3.1e-18	2644	3469	3469	3469	1.46	1190	34.3	805	23.21
144	FOXL1_HUMAN.H11MO.0.D	TKTTTGTTTRTTTAYWTTT	2.49e-23	3.01e-21	3.92e-18	121	3469	3469	3469	1.24	111	3.2	10	0.29
145	SMAD3_HUMAN.H11MO.0.B	SYCTSHCWSCWS	8.16e-25	4.11e-21	5.35e-18	5035	3469	3469	3469	1.28	2449	70.6	2042	58.86
146	MEF2C_HUMAN.H11MO.0.A	DKCTATTTTTRGM	5.74e-24	8.21e-21	1.07e-17	1431	3469	3469	3469	1.46	705	20.32	400	11.53
147	STAT3_HUMAN.H11MO.0.A	SAYTTCCMRGAA	6.7e-24	1.21e-20	1.58e-17	1807	3469	3469	3469	1.03	1086	31.31	720	20.76
148	MEF2D_HUMAN.H11MO.0.A	DKCTATTTTTAG	2.31e-23	2.25e-20	2.92e-17	971	3469	3469	3469	1.03	628	18.1	343	9.89
149	COT2_HUMAN.H11MO.1.A	RGRGYCARAGGTCARVR	8.72e-24	2.55e-20	3.32e-17	2927	3469	3469	3469	1.06	1662	47.91	1251	36.06
150	STA5B_HUMAN.H11MO.0.A	YTTCYKRGAAAY	3.49e-23	6.07e-20	7.9e-17	1741	3469	3469	3469	1.03	1043	30.07	688	19.83
151	PATZ1_HUMAN.H11MO.1.C	AGGGAGGGG	1.57e-23	6.27e-20	8.17e-17	4005	3469	3469	3469	1.37	1951	56.24	1537	44.31
152	ARNT2_HUMAN.H11MO.0.D	GNCGTGGSASRC	4.84e-23	1.05e-19	1.37e-16	2172	3469	3469	3469	1.86	877	25.28	547	15.77
153	NFIC_HUMAN.H11MO.0.A	CYTGGCHBYMWGCCARG	1.02e-22	2.92e-19	3.8e-16	2852	3469	3469	3469	8.9	509	14.67	256	7.38
154	COT1_HUMAN.H11MO.0.C	GRGGKSARAGGTCAGGG	2.49e-22	7.07e-19	9.21e-16	2836	3469	3469	3469	2.2	1170	33.73	807	23.26
155	E2F1_HUMAN.H11MO.0.A	RRNKGGCGGGAARR	4.95e-22	7.27e-19	9.47e-16	1470	3469	3469	3469	1.11	866	24.96	545	15.71
156	ARI3A_HUMAN.H11MO.0.D	RATTAAWBRRWATCAAAWTWWA	1.33e-21	8.51e-19	1.11e-15	639	3469	3469	3469	1.18	433	12.48	206	5.94
157	MLX_HUMAN.H11MO.0.D	YGATCACGTGN	3.78e-21	1.09e-18	1.43e-15	290	3469	3469	3469	1.29	216	6.23	65	1.87
158	ZFP28_HUMAN.H11MO.0.C	TTCTATTTCTTCTTGWGTCA	2.13e-21	1.23e-18	1.6e-15	577	3469	3469	3469	8.33	179	5.16	44	1.27
159	SP1_HUMAN.H11MO.1.A	VGGGGGCGGGGCCK	9.82e-22	1.27e-18	1.66e-15	1298	3469	3469	3469	1.12	788	22.72	482	13.89
160	SPI1_HUMAN.H11MO.0.A	RRAAAGAGGAAGTGRVD	1.47e-21	1.97e-18	2.57e-15	1342	3469	3469	3469	1.11	819	23.61	509	14.67
161	PROX1_HUMAN.H11MO.0.D	KGGKARGGCGKSKKGGG	8.93e-22	2.6e-18	3.39e-15	2915	3469	3469	3469	1.47	1396	40.24	1018	29.35
162	ATF2_HUMAN.H11MO.0.B	RRTGABGTCAY	2.94e-21	4.22e-18	5.49e-15	1435	3469	3469	3469	1.04	864	24.91	549	15.83
163	MAFG_HUMAN.H11MO.1.A	TGCTGAGT	1.64e-21	5.82e-18	7.58e-15	3554	3469	3469	3469	1.16	1791	51.63	1398	40.3
164	NR1D1_HUMAN.H11MO.0.B	RRRNMASTGGGTCAGDRDR	2.28e-21	8.07e-18	1.05e-14	3536	3469	3469	3469	1.98	1266	36.49	902	26
165	SMCA5_HUMAN.H11MO.0.C	GAATBGAATGGAAWC	5.81e-21	9.3e-18	1.21e-14	1600	3469	3469	3469	1.28	846	24.39	536	15.45
166	STA5A_HUMAN.H11MO.0.A	TTCYRRGAAR	7.04e-21	1.07e-17	1.39e-14	1522	3469	3469	3469	1.03	917	26.43	597	17.21
167	FOXB1_HUMAN.H11MO.0.D	RTMAATRTTTACATAAB	2.17e-20	1.07e-17	1.4e-14	494	3469	3469	3469	1.09	344	9.92	149	4.3
168	BCL6_HUMAN.H11MO.0.A	YKCTTTCYAGGAA	5.13e-21	1.18e-17	1.54e-14	2303	3469	3469	3469	1.33	1124	32.4	777	22.4
169	MAFF_HUMAN.H11MO.0.B	TGCTGASTCAGCABTTTT	1.87e-20	3.56e-17	4.64e-14	1905	3469	3469	3469	1.11	1113	32.08	772	22.25
170	Z354A_HUMAN.H11MO.0.C	RTTTARWYCATTTACATTTAATGT	5.74e-20	5.68e-17	7.4e-14	990	3469	3469	3469	1.35	627	18.07	363	10.46
171	KLF12_HUMAN.H11MO.0.C	VGGGGCGGGGC	5.5e-20	7.48e-17	9.73e-14	1360	3469	3469	3469	1.07	816	23.52	518	14.93
172	FOXD2_HUMAN.H11MO.0.D	WAWGTAAATRTTWWYTTAA	2.78e-19	8.97e-17	1.17e-13	322	3469	3469	3469	1.12	238	6.86	84	2.42
173	SRY_HUMAN.H11MO.0.B	YWTTGTTTH	3.49e-20	1.02e-16	1.33e-13	2922	3469	3469	3469	2.34	832	23.98	530	15.28
174	RARA_HUMAN.H11MO.0.A	GGRRGRTSMRRAGKTCAAGG	1.26e-19	2.42e-16	3.15e-13	1920	3469	3469	3469	7.24	396	11.42	189	5.45
175	SRBP2_HUMAN.H11MO.0.B	VSGTGGGGWGABG	1.05e-19	3.89e-16	5.07e-13	3692	3469	3469	3469	1.02	2033	58.6	1658	47.79
176	PAX5_HUMAN.H11MO.0.A	SCSKGGGCARCVRAGCGWGAC	6.78e-19	6.83e-16	8.89e-13	1007	3469	3469	3469	36.9	121	3.49	21	0.61
177	FOXC1_HUMAN.H11MO.0.C	CDWTGTTTACTTWRG	2e-18	1.02e-15	1.33e-12	512	3469	3469	3469	1.07	350	10.09	162	4.67
178	ZF64A_HUMAN.H11MO.0.D	GGGGCCCGGGAMYCDG	9.57e-19	1.68e-15	2.19e-12	1760	3469	3469	3469	1.08	1031	29.72	714	20.58
179	HXA11_HUMAN.H11MO.0.D	TWAADTTTTAYGR	1.36e-18	2.55e-15	3.32e-12	1876	3469	3469	3469	1.14	1034	29.81	718	20.7
180	IRF8_HUMAN.H11MO.0.B	RAAARRGGAASTGAAASTDR	2.96e-18	3.09e-15	4.03e-12	1046	3469	3469	3469	1.13	645	18.59	389	11.21
181	STAT4_HUMAN.H11MO.0.A	YTTCYYRGMAV	1.74e-18	4.46e-15	5.8e-12	2557	3469	3469	3469	1.16	1357	39.12	1013	29.2
182	XBP1_HUMAN.H11MO.0.D	GSKGACGTGGC	4.52e-18	6.19e-15	8.06e-12	1369	3469	3469	3469	1.24	691	19.92	428	12.34
183	KLF9_HUMAN.H11MO.0.C	GRRGKGGGCGTGGCC	8.66e-18	6.56e-15	8.54e-12	758	3469	3469	3469	1.22	469	13.52	253	7.29
184	MAFB_HUMAN.H11MO.0.B	TGCTGASTYAD	2.66e-18	9.49e-15	1.24e-11	3568	3469	3469	3469	1.14	1801	51.92	1441	41.54
185	RREB1_HUMAN.H11MO.0.D	DKGKKKGKGGKTGKTTTGGGKT	1.43e-17	1.2e-14	1.56e-11	837	3469	3469	3469	3.01	417	12.02	215	6.2
186	SOX4_HUMAN.H11MO.0.B	BYCTTTGTYYYB	5.35e-18	1.61e-14	2.09e-11	3001	3469	3469	3469	1.4	1386	39.95	1045	30.12
187	RARG_HUMAN.H11MO.1.B	VAGGTCAS	7.19e-18	2.34e-14	3.04e-11	3252	3469	3469	3469	3.32	861	24.82	573	16.52
188	PRDM1_HUMAN.H11MO.0.A	RAAAGTGAAAGTGR	1.33e-17	2.34e-14	3.05e-11	1762	3469	3469	3469	1.26	939	27.07	643	18.54
189	PO2F1_HUMAN.H11MO.0.C	AWKBRWATGSAAWYAW	1.68e-17	2.97e-14	3.87e-11	1774	3469	3469	3469	1.15	971	27.99	672	19.37
190	IRF4_HUMAN.H11MO.0.A	RAAWGRGGAASTGAAASY	4.82e-17	5.69e-14	7.4e-11	1179	3469	3469	3469	1.3	660	19.03	410	11.82
191	ZSC31_HUMAN.H11MO.0.C	RGCAGCAGGGCARTTAKR	5.31e-17	7.93e-14	1.03e-10	1493	3469	3469	3469	1.12	886	25.54	602	17.35
192	STAT1_HUMAN.H11MO.0.A	YCCVTTTCCHGGAAAWCHC	8.17e-17	8.05e-14	1.05e-10	986	3469	3469	3469	1.36	547	15.77	320	9.22
193	RXRB_HUMAN.H11MO.0.C	TSAGGTCASR	5.85e-17	1.47e-13	1.92e-10	2519	3469	3469	3469	4.78	376	10.84	188	5.42
194	ATF3_HUMAN.H11MO.0.A	GGTSACGTGAB	2.09e-16	1.66e-13	2.16e-10	795	3469	3469	3469	2.63	217	6.26	81	2.33
195	MAFK_HUMAN.H11MO.0.A	RAWWHTGCTGASTCAGCA	4.05e-16	2.09e-13	2.72e-10	515	3469	3469	3469	1.24	337	9.71	164	4.73
196	SPIB_HUMAN.H11MO.0.A	RRAAAGAGGAAGTGARA	2.42e-16	2.14e-13	2.79e-10	886	3469	3469	3469	1.11	553	15.94	328	9.46
197	Z324A_HUMAN.H11MO.0.C	KVTCAAACCATCCTTKSCTKSCW	9.64e-17	2.15e-13	2.79e-10	2226	3469	3469	3469	1.24	1228	35.4	911	26.26
198	UBIP1_HUMAN.H11MO.0.D	SCAGARA	8.57e-17	2.73e-13	3.55e-10	3183	3469	3469	3469	2.34	1087	31.33	782	22.54
199	RXRA_HUMAN.H11MO.1.A	SARAGGTCAS	1.06e-16	3.48e-13	4.53e-10	3278	3469	3469	3469	9.96	225	6.49	85	2.45
200	ZNF76_HUMAN.H11MO.0.C	RRKGCMTKCTGGGARWTGTAGT	4.1e-16	3.52e-13	4.58e-10	858	3469	3469	3469	1.31	526	15.16	308	8.88
201	USF1_HUMAN.H11MO.0.A	RGTCACGTGRBS	1.02e-15	4.36e-13	5.68e-10	428	3469	3469	3469	14.8	101	2.91	18	0.52
202	BMAL1_HUMAN.H11MO.0.A	KSCACGTGHSY	4e-16	4.77e-13	6.21e-10	1193	3469	3469	3469	2.99	309	8.91	144	4.15
203	HIF1A_HUMAN.H11MO.0.C	GDACGTGM	7.09e-16	6.21e-13	8.08e-10	876	3469	3469	3469	1.03	534	15.39	316	9.11
204	IKZF1_HUMAN.H11MO.0.C	BTGGGARR	2.8e-16	1.16e-12	1.51e-09	4144	3469	3469	3469	2.45	1353	39	1032	29.75
205	USF2_HUMAN.H11MO.0.A	GGGTCACGTGRBSVSSSSB	4.41e-15	1.8e-12	2.34e-09	407	3469	3469	3469	20.6	87	2.51	13	0.37
206	SMCA1_HUMAN.H11MO.0.C	CMARGAAGMATD	6.57e-16	2.1e-12	2.74e-09	3199	3469	3469	3469	1.34	1462	42.14	1139	32.83
207	ATF1_HUMAN.H11MO.0.B	HRRTGACGYMA	2.61e-15	2.28e-12	2.97e-09	872	3469	3469	3469	1.02	544	15.68	328	9.46
208	HNF1B_HUMAN.H11MO.0.A	DGTTAATRATTAACH	1.04e-14	6.11e-12	7.96e-09	588	3469	3469	3469	1.31	331	9.54	167	4.81
209	HNF1A_HUMAN.H11MO.0.C	DGTTAATKATTAACH	7.43e-15	7.18e-12	9.35e-09	966	3469	3469	3469	1.06	589	16.98	368	10.61
210	FOXP3_HUMAN.H11MO.0.D	AATKTGWTT	4.03e-15	9.96e-12	1.3e-08	2470	3469	3469	3469	1.02	1382	39.84	1072	30.9
211	TFEB_HUMAN.H11MO.0.C	RGTCACGTG	8.62e-14	1.01e-11	1.31e-08	117	3469	3469	3469	6.68	84	2.42	14	0.4
212	NFAC3_HUMAN.H11MO.0.B	TGGAAAAHY	4.36e-15	1.08e-11	1.41e-08	2483	3469	3469	3469	1.13	1337	38.54	1030	29.69
213	SMAD1_HUMAN.H11MO.0.D	RSCCTGTCTGCC	4.68e-15	1.1e-11	1.44e-08	2355	3469	3469	3469	1.11	1280	36.9	977	28.16
214	ZN335_HUMAN.H11MO.1.A	YGCCTGW	6.2e-15	1.6e-11	2.08e-08	2573	3469	3469	3469	1.01	1442	41.57	1131	32.6
215	IRF7_HUMAN.H11MO.0.C	GAAASYGAAA	7.43e-15	1.91e-11	2.48e-08	2569	3469	3469	3469	2.06	898	25.89	632	18.22
216	RARB_HUMAN.H11MO.0.D	SAGGTCAVVVV	1.4e-14	2.43e-11	3.16e-08	1739	3469	3469	3469	8.6	402	11.59	221	6.37
217	SOX2_HUMAN.H11MO.0.A	BBCCTTTGTYYYB	9.12e-15	2.75e-11	3.58e-08	3017	3469	3469	3469	1.44	1401	40.39	1094	31.54
218	TFE3_HUMAN.H11MO.0.B	RGTCACGTGA	4.47e-14	2.76e-11	3.59e-08	617	3469	3469	3469	33.8	68	1.96	7	0.2
219	CR3L2_HUMAN.H11MO.0.D	TGATGACGTGGCA	8.65e-14	2.87e-11	3.74e-08	332	3469	3469	3469	1.08	230	6.63	100	2.88
220	MNX1_HUMAN.H11MO.0.D	MBATTTDHWTHWCYHYTHH	1.08e-14	3.03e-11	3.94e-08	2815	3469	3469	3469	1.18	1417	40.85	1110	32
221	MYCN_HUMAN.H11MO.0.A	RGCCACGTGSDS	3.74e-14	3.28e-11	4.26e-08	876	3469	3469	3469	2.36	305	8.79	151	4.35
222	ZN563_HUMAN.H11MO.1.C	SHRGCAGCWSWG	3.15e-14	1.03e-10	1.34e-07	3266	3469	3469	3469	1.61	1350	38.92	1052	30.33
223	LMX1B_HUMAN.H11MO.0.D	TAATTAAHWRMYTWWWWW	1.27e-13	1.06e-10	1.38e-07	833	3469	3469	3469	2.14	351	10.12	188	5.42
224	LMX1A_HUMAN.H11MO.0.D	TAATTAATTWKKTWATTWW	2.03e-13	1.21e-10	1.58e-07	597	3469	3469	3469	1.28	356	10.26	193	5.56
225	NFIA_HUMAN.H11MO.0.C	TTGGCHNRNWGCCAR	7.7e-14	1.95e-10	2.54e-07	2538	3469	3469	3469	6.31	358	10.32	192	5.53
226	MITF_HUMAN.H11MO.0.A	TCACGTGACC	2.73e-13	2.03e-10	2.65e-07	744	3469	3469	3469	54.7	65	1.87	7	0.2
227	LYL1_HUMAN.H11MO.0.A	CCAKCTGYTYYCTB	6.5e-14	2.98e-10	3.88e-07	4590	3469	3469	3469	1.69	1637	47.19	1331	38.37
228	AP2C_HUMAN.H11MO.0.A	VTGSCCTGRGGSHR	2.1e-13	4.33e-10	5.63e-07	2061	3469	3469	3469	4.55	635	18.3	418	12.05
229	FOXO4_HUMAN.H11MO.0.C	TTGTTTAYK	3.4e-13	6.36e-10	8.28e-07	1868	3469	3469	3469	1.91	775	22.34	540	15.57
230	ESR2_HUMAN.H11MO.1.A	AGGTCAS	2.38e-13	6.46e-10	8.42e-07	2719	3469	3469	3469	1.42	1225	35.31	945	27.24
231	BHE40_HUMAN.H11MO.0.A	DGCACGTGAS	8.71e-13	7.37e-10	9.6e-07	846	3469	3469	3469	6.68	119	3.43	34	0.98
232	HXA10_HUMAN.H11MO.0.C	KATRRTTTATGW	7.35e-13	8.11e-10	1.06e-06	1104	3469	3469	3469	1.08	633	18.25	421	12.14
233	ZN322_HUMAN.H11MO.0.B	GWGCCTGSTACWSWGCCTGR	9.04e-13	9.82e-10	1.28e-06	1086	3469	3469	3469	1.47	575	16.58	373	10.75
234	COT2_HUMAN.H11MO.0.A	CARAGGTCARRGD	3.85e-13	9.96e-10	1.3e-06	2588	3469	3469	3469	3.34	663	19.11	444	12.8
235	HXC12_HUMAN.H11MO.0.D	DTTTTAYKACYT	9.32e-13	1.14e-09	1.48e-06	1223	3469	3469	3469	1.02	723	20.84	499	14.38
236	IRX2_HUMAN.H11MO.0.D	RCDKGKBDKGDCRKGTDVK	5.87e-13	1.57e-09	2.04e-06	2674	3469	3469	3469	1.57	1017	29.32	758	21.85
237	STAT6_HUMAN.H11MO.0.B	TTCTSWGGAAR	7.86e-13	1.86e-09	2.43e-06	2372	3469	3469	3469	1.12	1242	35.8	967	27.88
238	AP2A_HUMAN.H11MO.0.A	ATKSCCTGRGGSHAD	8.98e-13	2.1e-09	2.73e-06	2333	3469	3469	3469	4.2	700	20.18	479	13.81
239	TF65_HUMAN.H11MO.0.A	HWGGGRATTTCCMV	2.22e-12	2.77e-09	3.61e-06	1251	3469	3469	3469	2.99	413	11.91	244	7.03
240	ZN263_HUMAN.H11MO.1.A	SRGGGAGGASG	4.72e-12	6.84e-09	8.9e-06	1450	3469	3469	3469	1.04	837	24.13	606	17.47
241	HXA9_HUMAN.H11MO.0.B	RTGATTTATKR	5.36e-12	7.27e-09	9.46e-06	1355	3469	3469	3469	4.13	252	7.26	124	3.57
242	MAF_HUMAN.H11MO.0.A	VAAWBTGCTGASTHWGCMD	4.07e-12	9.01e-09	1.17e-05	2214	3469	3469	3469	2.38	658	18.97	449	12.94
243	AP2D_HUMAN.H11MO.0.D	CGCCYGVGGCSCGT	1.47e-11	9.12e-09	1.19e-05	620	3469	3469	3469	1.07	388	11.18	230	6.63
244	HEY1_HUMAN.H11MO.0.D	KGRCACGTGBCK	2.33e-11	9.19e-09	1.2e-05	395	3469	3469	3469	1.66	208	6	96	2.77
245	CREB1_HUMAN.H11MO.0.A	NRRTGACGTMA	1.29e-11	9.6e-09	1.25e-05	746	3469	3469	3469	1.02	457	13.17	285	8.22
246	ZFHX3_HUMAN.H11MO.0.D	ATTAWTAATTA	1.81e-11	1.23e-08	1.6e-05	678	3469	3469	3469	1.43	372	10.72	218	6.28
247	SPDEF_HUMAN.H11MO.0.D	RWCCMGGAWGWAGT	1.34e-11	1.86e-08	2.42e-05	1386	3469	3469	3469	1.09	774	22.31	555	16
248	IRF2_HUMAN.H11MO.0.A	RAAAVHGAAAGTGAAASTRV	4.5e-11	2.81e-08	3.65e-05	623	3469	3469	3469	1.25	371	10.69	220	6.34
249	KLF14_HUMAN.H11MO.0.D	DRGKGGGCGTGGY	4.37e-11	2.81e-08	3.66e-05	643	3469	3469	3469	1.05	400	11.53	243	7
250	ZN335_HUMAN.H11MO.0.A	RGCTGYCYNBVSCKMTGCCTGW	2.61e-11	2.92e-08	3.8e-05	1120	3469	3469	3469	2.62	422	12.16	259	7.47
251	EGR4_HUMAN.H11MO.0.D	GGSGGYRGGGM	2.51e-11	2.94e-08	3.83e-05	1173	3469	3469	3469	1.05	684	19.72	479	13.81
252	ESR1_HUMAN.H11MO.1.A	CHRGGTCASV	1.55e-11	3.95e-08	5.14e-05	2543	3469	3469	3469	1.11	1333	38.43	1069	30.82
253	PO4F1_HUMAN.H11MO.0.D	CATTAATTATTCAT	8.72e-11	4.28e-08	5.57e-05	490	3469	3469	3469	1.3	282	8.13	153	4.41
254	OSR2_HUMAN.H11MO.0.C	GBYSCWGCTNCTGYDG	2.02e-11	5.04e-08	6.56e-05	2492	3469	3469	3469	1.06	1364	39.32	1100	31.71
255	BHE23_HUMAN.H11MO.0.D	RRSRTRTGKTDB	2.62e-11	8.46e-08	0.00011	3225	3469	3469	3469	1.15	1501	43.27	1233	35.54
256	MAFG_HUMAN.H11MO.0.A	RWWWNTGCTGASTCAGCA	3.64e-10	8.89e-08	0.000116	244	3469	3469	3469	1.16	168	4.84	74	2.13
257	ZN282_HUMAN.H11MO.0.D	MGKRTTRTGGGARA	5.29e-11	1e-07	0.00013	1893	3469	3469	3469	1.26	900	25.94	674	19.43
258	MAX_HUMAN.H11MO.0.A	VRGCACGTGG	7.74e-11	1e-07	0.000131	1296	3469	3469	3469	1.64	487	14.04	316	9.11
259	PTF1A_HUMAN.H11MO.0.B	SCAGCTGBYBBYBYYCHC	5.26e-11	1.24e-07	0.000161	2352	3469	3469	3469	1.86	976	28.13	743	21.42
260	ZN768_HUMAN.H11MO.0.C	GAGGCHCAGAGAGGTTAAGT	2.73e-10	1.29e-07	0.000168	471	3469	3469	3469	51.3	69	1.99	14	0.4
261	NR4A1_HUMAN.H11MO.0.A	AAAGGKCAV	3.7e-11	1.54e-07	0.000201	4169	3469	3469	3469	2.32	872	25.14	647	18.65
262	REL_HUMAN.H11MO.0.B	DRWRGGGRAATKCCA	5.98e-11	1.58e-07	0.000206	2641	3469	3469	3469	1.08	1418	40.88	1158	33.38
263	FOXO6_HUMAN.H11MO.0.D	WWSWTGTTTACRT	2.57e-10	2.1e-07	0.000273	817	3469	3469	3469	1.04	490	14.13	323	9.31
264	AP2B_HUMAN.H11MO.0.B	GCCYGVGGGS	1.13e-10	3.01e-07	0.000393	2658	3469	3469	3469	1.12	1390	40.07	1135	32.72
265	EGR3_HUMAN.H11MO.0.D	WGAGTGGGYGT	3.25e-10	3.2e-07	0.000417	987	3469	3469	3469	9.82	180	5.19	82	2.36
266	SMAD2_HUMAN.H11MO.0.A	TGTCTGNCWCCT	1.33e-10	3.95e-07	0.000514	2974	3469	3469	3469	1.59	1211	34.91	966	27.85
267	NKX61_HUMAN.H11MO.0.B	GAYWAATKRSHWWTTAATK	2.77e-10	4.31e-07	0.000562	1558	3469	3469	3469	1.19	813	23.44	604	17.41
268	NRL_HUMAN.H11MO.0.D	TGCTGACKYWR	2.04e-10	4.32e-07	0.000562	2116	3469	3469	3469	1.04	1154	33.27	915	26.38
269	BARX1_HUMAN.H11MO.0.D	BWAATKGTTTYY	1.82e-10	4.7e-07	0.000611	2586	3469	3469	3469	1.03	1411	40.67	1158	33.38
270	EPAS1_HUMAN.H11MO.0.B	VTACGTGMC	9.74e-10	5.21e-07	0.000679	535	3469	3469	3469	1.04	326	9.4	194	5.59
271	MXI1_HUMAN.H11MO.0.A	VCACGTGGSNGSBGS	3.85e-10	5.6e-07	0.00073	1456	3469	3469	3469	5.02	234	6.75	121	3.49
272	ARNT_HUMAN.H11MO.0.B	STACGTGMC	9.33e-10	5.65e-07	0.000736	606	3469	3469	3469	1.03	370	10.67	229	6.6
273	GSX2_HUMAN.H11MO.0.D	YTAATTRSHWWTTAAT	4.96e-10	6.63e-07	0.000863	1337	3469	3469	3469	1.15	712	20.52	517	14.9
274	CREB3_HUMAN.H11MO.0.D	KGRTGACGTGGCA	5.87e-09	6.69e-07	0.000871	114	3469	3469	3469	1.06	87	2.51	27	0.78
275	NKX61_HUMAN.H11MO.1.B	WAATGRV	2.58e-10	9.42e-07	0.00123	3657	3469	3469	3469	2.43	703	20.27	506	14.59
276	JDP2_HUMAN.H11MO.0.D	BGATGACGTCAY	7.9e-09	1.13e-06	0.00147	143	3469	3469	3469	4.26	52	1.5	9	0.26
277	ZN554_HUMAN.H11MO.0.C	GCWGAGYCANGTRGDKKRCT	5.85e-10	1.14e-06	0.00148	1946	3469	3469	3469	1.61	851	24.53	642	18.51
278	RARG_HUMAN.H11MO.0.B	RGGTCASVRTGVCMTGRV	5.05e-10	1.17e-06	0.00152	2320	3469	3469	3469	1.31	1097	31.62	867	24.99
279	HAND1_HUMAN.H11MO.0.D	RGSYCTGGYYWNTSTCA	5.15e-10	1.18e-06	0.00154	2297	3469	3469	3469	1.05	1266	36.49	1026	29.58
280	PO4F3_HUMAN.H11MO.0.D	TCATTAATTATKCAT	4.3e-09	1.23e-06	0.0016	286	3469	3469	3469	1.14	189	5.45	94	2.71
281	BPTF_HUMAN.H11MO.0.D	KKTBTTGTKKKS	5e-10	1.65e-06	0.00214	3293	3469	3469	3469	5.95	385	11.1	239	6.89
282	ZEP2_HUMAN.H11MO.0.D	GGYDGGGWAACCSS	9.97e-10	1.88e-06	0.00245	1883	3469	3469	3469	2.29	467	13.46	309	8.91
283	E2F4_HUMAN.H11MO.1.A	GGCGGGAADTTBNR	2.23e-09	2.13e-06	0.00277	955	3469	3469	3469	1.1	527	15.19	363	10.46
284	THA_HUMAN.H11MO.1.D	BTSAGGTCAS	1.11e-09	2.46e-06	0.0032	2221	3469	3469	3469	3.4	501	14.44	338	9.74
285	HXB13_HUMAN.H11MO.0.A	TTTTATDGSH	1.46e-09	2.47e-06	0.00321	1696	3469	3469	3469	1.02	951	27.41	738	21.27
286	ATF6A_HUMAN.H11MO.0.B	GKGSTGACGTGG	1.32e-08	2.5e-06	0.00326	190	3469	3469	3469	1.43	119	3.43	48	1.38
287	HSF1_HUMAN.H11MO.0.A	BRGAANSTTCYRGAA	2.93e-09	2.54e-06	0.00331	866	3469	3469	3469	4.92	219	6.31	115	3.32
288	THAP1_HUMAN.H11MO.0.C	SGCCGCCATSTYGGSYBCGGGC	1.8e-09	2.6e-06	0.00339	1443	3469	3469	3469	1.19	819	23.61	619	17.84
289	BATF3_HUMAN.H11MO.0.B	BRSTTTCADTWTGASWM	1.68e-09	2.83e-06	0.00368	1685	3469	3469	3469	1.13	890	25.66	683	19.69
290	EVX1_HUMAN.H11MO.0.D	TGATTTATKGCYW	2.33e-09	3.36e-06	0.00437	1439	3469	3469	3469	1.83	508	14.64	347	10
291	ZFX_HUMAN.H11MO.0.A	SCAGGCCBCR	1.71e-09	3.41e-06	0.00444	1989	3469	3469	3469	2.93	686	19.78	500	14.41
292	FOXD1_HUMAN.H11MO.0.D	CWWTGTTTACHTWVR	3.29e-09	3.69e-06	0.00481	1123	3469	3469	3469	1.09	629	18.13	453	13.06
293	SRF_HUMAN.H11MO.0.A	TTKCCWTWTWTGGBCWTD	6.21e-09	4.59e-06	0.00597	738	3469	3469	3469	16.5	92	2.65	30	0.86
294	LEF1_HUMAN.H11MO.0.A	BCCTTTSWWNTBYH	1.16e-09	5.34e-06	0.00696	4615	3469	3469	3469	1.92	1488	42.89	1244	35.86
295	NR1H3_HUMAN.H11MO.1.B	MVAGGTCAVR	1.55e-09	5.49e-06	0.00715	3538	3469	3469	3469	2.98	811	23.38	611	17.61
296	FOXQ1_HUMAN.H11MO.0.C	HATTGTTTATTT	1.9e-08	6.13e-06	0.00798	322	3469	3469	3469	1.42	180	5.19	91	2.62
297	ATF2_HUMAN.H11MO.1.B	WDDWGATGATGTCATCWWTW	6.05e-08	7.33e-06	0.00954	121	3469	3469	3469	2.71	73	2.1	22	0.63
298	PITX2_HUMAN.H11MO.0.D	TKGGATTAVH	5.9e-09	1.08e-05	0.0141	1832	3469	3469	3469	15.6	61	1.76	13	0.37
299	HSFY1_HUMAN.H11MO.0.D	WWTCGAACGWWW	3.61e-08	1.12e-05	0.0146	310	3469	3469	3469	1.23	171	4.93	86	2.48
300	CREM_HUMAN.H11MO.0.C	CRVTGACGTCA	1.56e-08	1.23e-05	0.016	788	3469	3469	3469	1.41	370	10.67	239	6.89
301	MXI1_HUMAN.H11MO.1.A	SCCACGTGSYB	8.42e-09	1.37e-05	0.0178	1622	3469	3469	3469	3.92	230	6.63	126	3.63
302	NFIB_HUMAN.H11MO.0.D	YCYTGGCAS	4.77e-09	1.76e-05	0.023	3694	3469	3469	3469	7	536	15.45	374	10.78
303	GATA2_HUMAN.H11MO.0.A	STGBNNNNNDVAGATAAGR	1.78e-08	1.86e-05	0.0242	1041	3469	3469	3469	4.73	202	5.82	107	3.08
304	RARG_HUMAN.H11MO.2.D	GGRGKTCRVCNRVAGGTCAV	1.38e-08	1.98e-05	0.0258	1438	3469	3469	3469	3.12	414	11.93	275	7.93
305	THB_HUMAN.H11MO.0.C	GRSSYSASVTSAGGTCA	1.65e-08	2.12e-05	0.0276	1289	3469	3469	3469	2.03	511	14.73	358	10.32
306	PTF1A_HUMAN.H11MO.1.B	RGCAGCTGG	8.99e-09	2.54e-05	0.0331	2824	3469	3469	3469	2.22	984	28.37	779	22.46
307	NR1H4_HUMAN.H11MO.1.B	RGGTCAKT	9.03e-09	3.14e-05	0.0408	3473	3469	3469	3469	1.93	1153	33.24	937	27.01
308	CREB5_HUMAN.H11MO.0.D	RRTGACGTMAT	4.26e-07	4.43e-05	0.0577	104	3469	3469	3469	2.44	58	1.67	16	0.46
309	GATA1_HUMAN.H11MO.0.A	STGBNNNDNVSAGATAAGV	4.74e-08	5.02e-05	0.0653	1059	3469	3469	3469	2.93	295	8.5	182	5.25
310	PPARG_HUMAN.H11MO.0.A	MWSTRGGKSARAGGKCA	1.98e-08	5.07e-05	0.066	2559	3469	3469	3469	12.5	215	6.2	117	3.37
311	PO6F1_HUMAN.H11MO.0.D	CATAAWTTATGCR	4.84e-07	5.9e-05	0.0769	122	3469	3469	3469	1.3	83	2.39	31	0.89
312	THA_HUMAN.H11MO.0.C	RGGTCABYTSAGGTCAK	2.33e-08	6.21e-05	0.0809	2661	3469	3469	3469	30.8	50	1.44	9	0.26
313	CLOCK_HUMAN.H11MO.0.C	CWGHCACGTGMVVM	2.4e-08	6.3e-05	0.082	2628	3469	3469	3469	6.6	97	2.8	35	1.01
314	ITF2_HUMAN.H11MO.0.C	DGCAGSTGKS	1.87e-08	6.48e-05	0.0844	3463	3469	3469	3469	1.46	1484	42.78	1259	36.29
315	RORA_HUMAN.H11MO.0.C	AWSTRGGTCARRG	2.14e-08	7.5e-05	0.0977	3500	3469	3469	3469	2.53	934	26.92	738	21.27
316	GATA2_HUMAN.H11MO.1.A	DSAGATAAGRR	4.68e-08	9.38e-05	0.122	2004	3469	3469	3469	2.11	555	16	401	11.56
317	RFX4_HUMAN.H11MO.0.D	SGTTGCCATGGYWAC	3.07e-07	0.000115	0.15	375	3469	3469	3469	9.45	71	2.05	23	0.66
318	THB_HUMAN.H11MO.1.D	SGTSAGGTCA	6.87e-08	0.00013	0.17	1897	3469	3469	3469	2.19	639	18.42	477	13.75
319	ZNF41_HUMAN.H11MO.1.C	CACAAGGRARWV	5.79e-08	0.00015	0.195	2589	3469	3469	3469	1.74	963	27.76	771	22.23
320	TEF_HUMAN.H11MO.0.D	TGTTTATGTAAMTK	1.64e-07	0.000161	0.209	980	3469	3469	3469	1.34	457	13.17	322	9.28
321	NKX22_HUMAN.H11MO.0.D	DSAGWGSH	2.92e-08	0.00017	0.222	5841	3469	3469	3469	1.6	2066	59.56	1841	53.07
322	ZEB1_HUMAN.H11MO.0.A	BVCAGGTGWG	6.68e-08	0.000188	0.245	2813	3469	3469	3469	1.04	1491	42.98	1275	36.75
323	ZEP1_HUMAN.H11MO.0.D	TGGGAAATCCCB	1.98e-07	0.000194	0.253	983	3469	3469	3469	1.16	540	15.57	395	11.39
324	TBX3_HUMAN.H11MO.0.C	DRAGGTGBSAR	5.86e-08	0.000236	0.307	4021	3469	3469	3469	6.16	336	9.69	216	6.23
325	GATA4_HUMAN.H11MO.0.A	DSAGATAAGA	1.85e-07	0.000253	0.33	1372	3469	3469	3469	4.59	263	7.58	161	4.64
326	HXC13_HUMAN.H11MO.0.D	DDTTTTACKAG	1.97e-07	0.000254	0.331	1294	3469	3469	3469	1.05	715	20.61	551	15.88
327	BHA15_HUMAN.H11MO.0.B	SSAGCAGCTGG	1.44e-07	0.000258	0.336	1797	3469	3469	3469	1.11	961	27.7	775	22.34
328	NR4A2_HUMAN.H11MO.0.C	AAAGGTCAS	1.61e-07	0.000288	0.375	1792	3469	3469	3469	2.32	556	16.03	408	11.76
329	MYC_HUMAN.H11MO.0.A	RCCACGTGCTB	3.46e-07	0.000321	0.418	927	3469	3469	3469	2.14	335	9.66	222	6.4
330	PO5F1_HUMAN.H11MO.1.A	WHATGCAVAT	1.29e-07	0.000335	0.436	2596	3469	3469	3469	1.09	1302	37.53	1097	31.62
331	HSF4_HUMAN.H11MO.0.D	TRGAABVTTCTAGAA	1.57e-06	0.000448	0.584	285	3469	3469	3469	1.28	166	4.79	92	2.65
332	ZKSC1_HUMAN.H11MO.0.B	WGHRSMCCTACTRTGTGCH	9.09e-07	0.00048	0.625	528	3469	3469	3469	33.6	41	1.18	8	0.23
333	MAF_HUMAN.H11MO.1.B	TGCTGAST	1.81e-07	0.000503	0.654	2771	3469	3469	3469	1.33	1241	35.77	1041	30.01
334	MEIS1_HUMAN.H11MO.0.A	RTGATTKATKRB	3.97e-07	0.000538	0.701	1355	3469	3469	3469	1.65	520	14.99	381	10.98
335	ATF2_HUMAN.H11MO.2.C	RRTGACGTCAS	9.7e-06	0.000543	0.707	56	3469	3469	3469	1.11	44	1.27	12	0.35
336	DLX1_HUMAN.H11MO.0.D	WWWWWTATGSTAATTA	3.75e-07	0.000561	0.731	1497	3469	3469	3469	1.13	792	22.83	625	18.02
337	ZNF85_HUMAN.H11MO.0.C	AWAGAARWCTGMWGKAATCT	8.01e-07	0.000647	0.842	808	3469	3469	3469	1.18	461	13.29	333	9.6
338	PO3F2_HUMAN.H11MO.0.A	YYCATGCATWTYCATTM	4.05e-07	0.000682	0.888	1683	3469	3469	3469	1.06	930	26.81	753	21.71
339	TAL1_HUMAN.H11MO.0.A	CTGSNVVSBRSWGATAAGV	1.01e-06	0.000713	0.928	708	3469	3469	3469	2.51	232	6.69	142	4.09
340	DMBX1_HUMAN.H11MO.0.D	YMMTWWWAAYCYAATTAABD	1.01e-06	0.000751	0.978	744	3469	3469	3469	1.07	432	12.45	309	8.91
341	SRBP1_HUMAN.H11MO.0.A	DGTSRGGTGAB	2.87e-07	0.000799	1.04	2789	3469	3469	3469	2.06	820	23.64	649	18.71
342	FOXH1_HUMAN.H11MO.0.A	TGTGGATTS	4.4e-07	0.000813	1.06	1850	3469	3469	3469	1.02	1016	29.29	834	24.04
343	E4F1_HUMAN.H11MO.0.D	YGTKACGTC	4.75e-06	0.000831	1.08	175	3469	3469	3469	1.91	92	2.65	41	1.18
344	RFX3_HUMAN.H11MO.0.B	BGTTRCCATGGYRA	5.59e-06	0.00107	1.4	192	3469	3469	3469	13.6	47	1.35	13	0.37
345	ZN418_HUMAN.H11MO.0.C	TGCTTYTRGCYTCTKVY	6.26e-07	0.00113	1.47	1805	3469	3469	3469	1.08	975	28.11	798	23
346	HSF2_HUMAN.H11MO.0.A	VGAABRTTCTAGAA	7.71e-07	0.00119	1.55	1549	3469	3469	3469	1.76	475	13.69	345	9.95
347	HEY2_HUMAN.H11MO.0.D	GKBGGCWCGTGGCHTBV	2.47e-06	0.00142	1.85	575	3469	3469	3469	1.68	270	7.78	176	5.07
348	NFIC_HUMAN.H11MO.1.A	TYYTGGCWS	3.58e-07	0.0015	1.95	4185	3469	3469	3469	4.8	689	19.86	531	15.31
349	HNF1B_HUMAN.H11MO.1.A	DGTTAATVATT	2.31e-06	0.00173	2.25	749	3469	3469	3469	1.34	354	10.2	246	7.09
350	HIC2_HUMAN.H11MO.0.D	HCRTGCCAGVN	1.07e-06	0.00178	2.32	1664	3469	3469	3469	1.04	910	26.23	741	21.36
351	TBP_HUMAN.H11MO.0.A	MTATAAAARS	1.31e-06	0.00198	2.58	1509	3469	3469	3469	1.22	676	19.49	527	15.19
352	GATA1_HUMAN.H11MO.1.A	DSAGATAAGVV	1.74e-06	0.00207	2.7	1192	3469	3469	3469	1.79	501	14.44	372	10.72
353	HXC11_HUMAN.H11MO.0.D	DTTTWAYGACY	2.22e-06	0.00214	2.78	962	3469	3469	3469	1.04	530	15.28	399	11.5
354	ZN436_HUMAN.H11MO.0.C	TCMRGGARGGCTTCCTGGAGGAGG	5.92e-05	0.00254	3.31	43	3469	3469	3469	28.4	20	0.58	2	0.06
355	HES1_HUMAN.H11MO.0.D	VMGVCACGMGMCM	1.59e-06	0.00263	3.42	1652	3469	3469	3469	1.46	678	19.54	530	15.28
356	PO3F4_HUMAN.H11MO.0.D	TMATTTGCATAATTWAW	4.88e-06	0.00296	3.86	608	3469	3469	3469	1.12	350	10.09	246	7.09
357	ZIM3_HUMAN.H11MO.0.C	KTRGGTTTCTGTTKYYTKY	5.45e-06	0.00306	3.98	562	3469	3469	3469	1.23	320	9.22	221	6.37
358	PAX4_HUMAN.H11MO.0.D	TWAYTAATTMRH	2.5e-06	0.00337	4.39	1353	3469	3469	3469	1.08	710	20.47	562	16.2
359	RFX2_HUMAN.H11MO.0.A	CKGTTGCCATGGCRACVS	1.53e-05	0.0035	4.56	229	3469	3469	3469	12.9	50	1.44	16	0.46
360	ATF7_HUMAN.H11MO.0.D	KRTGACGTCAT	5.19e-05	0.00368	4.79	71	3469	3469	3469	1.08	52	1.5	19	0.55
361	MAFA_HUMAN.H11MO.0.D	STGCTGACBMYGCAGYHTYCV	2.21e-06	0.00373	4.86	1693	3469	3469	3469	1.98	615	17.73	475	13.69
362	HEN1_HUMAN.H11MO.0.C	BGGGKMKCAGCTGCGKCCYY	1.07e-05	0.00396	5.16	370	3469	3469	3469	6.03	101	2.91	49	1.41
363	ZNF8_HUMAN.H11MO.0.C	TGTGGTATATCCATACAATGGA	0.000198	0.00434	5.65	22	3469	3469	3469	2.38	18	0.52	2	0.06
364	ZN528_HUMAN.H11MO.0.C	CCMAGGGAAGYCATTTCTSA	1.01e-05	0.00475	6.18	472	3469	3469	3469	1.27	280	8.07	190	5.48
365	NR1D1_HUMAN.H11MO.1.D	AWAARTAGGTCARW	1.1e-05	0.00533	6.94	487	3469	3469	3469	2.73	174	5.02	104	3
366	HXA2_HUMAN.H11MO.0.D	NGTAATTARBD	5.38e-06	0.00538	7	1002	3469	3469	3469	1.15	521	15.02	396	11.42
367	HXB2_HUMAN.H11MO.0.D	WAGAAYVTTCTAGAA	1.2e-05	0.00566	7.37	472	3469	3469	3469	37.4	36	1.04	8	0.23
368	CTCFL_HUMAN.H11MO.0.A	GCCDSYAGGGGGCGCYV	7.48e-06	0.00568	7.39	761	3469	3469	3469	347	17	0.49	0	0
369	SIX2_HUMAN.H11MO.0.A	KGAAAYHTGAKMC	3.35e-06	0.00588	7.65	1761	3469	3469	3469	1.03	960	27.67	796	22.95
370	MECP2_HUMAN.H11MO.0.C	SCCGGRR	5.73e-06	0.00656	8.54	1149	3469	3469	3469	4.94	296	8.53	201	5.79
# AME (Analysis of Motif Enrichment): Version 5.0.5 compiled on Jul 15 2019 at 00:31:14
# The format of this file is described at http://meme-suite.org//doc/ame-output-format.html.
# ame --verbose 1 --oc . --scoring avg --method fisher --hit-lo-fraction 0.25 --evalue-report-threshold 10.0 --control --shuffle-- --kmer 2 YAP_chip_seq.fasta db/HUMAN/HOCOMOCOv11_full_HUMAN_mono_meme_format.meme db/MOUSE/HOCOMOCOv11_full_MOUSE_mono_meme_format.meme

## Sheet: YAP-TFE3.ChIP.AME.Enrichment
rank	motif_ID	consensus	p-value	adj_p-value	E-value	tests	FASTA_max	pos	neg	PWM_min	TP	%TP	FP	%FP
1	TEAD4_HUMAN.H11MO.0.A	RCATTCCWGRVAK	1.36e-235	3.95e-232	5.14e-229	2893	3131	3131	3131	1.82	1720	54.93	504	16.1
2	TEAD1_HUMAN.H11MO.0.A	RCATTCCWGSCW	1.41e-216	3.8e-213	4.95e-210	2695	3131	3131	3131	1.65	1677	53.56	514	16.42
3	TEAD2_HUMAN.H11MO.0.D	HYACATTCCWGG	2.42e-205	5.2e-202	6.77e-199	2145	3131	3131	3131	1.36	1496	47.78	408	13.03
4	MITF_HUMAN.H11MO.0.A	TCACGTGACC	2.05e-172	2.75e-169	3.58e-166	1343	3131	3131	3131	1.08	1092	34.88	221	7.06
5	TFE3_HUMAN.H11MO.0.B	RGTCACGTGA	8.03e-155	9.57e-152	1.25e-148	1191	3131	3131	3131	1.03	992	31.68	198	6.32
6	FOSL1_HUMAN.H11MO.0.A	KRVTGAGTCAYH	2.52e-153	3.5e-150	4.55e-147	1385	3131	3131	3131	1.32	1068	34.11	244	7.79
7	FOSL2_HUMAN.H11MO.0.A	NDRTGAGTCAYH	5.02e-151	6.82e-148	8.88e-145	1358	3131	3131	3131	1.86	990	31.62	204	6.52
8	FOS_HUMAN.H11MO.0.A	VTGAGTCAB	1.2e-148	2.41e-145	3.13e-142	2010	3131	3131	3131	2.5	1062	33.92	250	7.98
9	USF1_HUMAN.H11MO.0.A	RGTCACGTGRBS	2.56e-145	2.38e-142	3.1e-139	929	3131	3131	3131	1.6	722	23.06	82	2.62
10	JUND_HUMAN.H11MO.0.A	RRTGAGTCAYY	2.24e-143	3.78e-140	4.92e-137	1691	3131	3131	3131	1.63	1106	35.32	288	9.2
11	JUN_HUMAN.H11MO.0.A	DRTGAGTCAYH	2.16e-142	3.39e-139	4.41e-136	1567	3131	3131	3131	1.77	1018	32.51	237	7.57
12	MLX_HUMAN.H11MO.0.D	YGATCACGTGN	1.98e-140	1.52e-137	1.98e-134	768	3131	3131	3131	1.56	654	20.89	61	1.95
13	FOSB_HUMAN.H11MO.0.A	RTGAGTCAB	4.13e-139	9.31e-136	1.21e-132	2253	3131	3131	3131	5.12	905	28.9	180	5.75
14	USF2_HUMAN.H11MO.0.A	GGGTCACGTGRBSVSSSSB	7.91e-131	7.16e-128	9.32e-125	905	3131	3131	3131	1.07	775	24.75	128	4.09
15	JUNB_HUMAN.H11MO.0.A	DVTGAGTCABH	1.36e-125	2.56e-122	3.33e-119	1886	3131	3131	3131	5.98	783	25.01	141	4.5
16	BHE40_HUMAN.H11MO.0.A	DGCACGTGAS	1.02e-120	1.38e-117	1.8e-114	1356	3131	3131	3131	1.14	989	31.59	267	8.53
17	BMAL1_HUMAN.H11MO.0.A	KSCACGTGHSY	7.18e-117	1.12e-113	1.46e-110	1560	3131	3131	3131	1.16	1097	35.04	346	11.05
18	TFEB_HUMAN.H11MO.0.C	RGTCACGTG	6.07e-105	2.56e-102	3.33e-99	422	3131	3131	3131	1.42	399	12.74	14	0.45
19	MYCN_HUMAN.H11MO.0.A	RGCCACGTGSDS	8.88e-90	1.24e-86	1.61e-83	1392	3131	3131	3131	1.03	1019	32.55	369	11.79
20	ETV6_HUMAN.H11MO.0.D	RCAGGAARK	4.43e-89	1.66e-85	2.16e-82	3741	3131	3131	3131	1.72	1820	58.13	1036	33.09
21	ETV5_HUMAN.H11MO.0.C	RRRSAGGAARDGRV	1.2e-87	4.59e-84	5.98e-81	3832	3131	3131	3131	2.06	1652	52.76	886	28.3
22	ETV4_HUMAN.H11MO.0.B	VRCAGGAARBR	5.34e-85	1.93e-81	2.51e-78	3613	3131	3131	3131	1.46	1885	60.2	1117	35.68
23	MAX_HUMAN.H11MO.0.A	VRGCACGTGG	1.53e-83	2.59e-80	3.37e-77	1695	3131	3131	3131	1.03	1178	37.62	506	16.16
24	ZBT17_HUMAN.H11MO.0.A	SRRGGWGGGGGAGGGGMRR	8.73e-84	2.9e-80	3.77e-77	3319	3131	3131	3131	3.87	1336	42.67	630	20.12
25	ATF3_HUMAN.H11MO.0.A	GGTSACGTGAB	4.03e-82	4.93e-79	6.42e-76	1224	3131	3131	3131	1.02	908	29	316	10.09
26	FLI1_HUMAN.H11MO.0.A	SRRGGMAGGAAGGRRRGR	9.12e-80	2.13e-76	2.78e-73	2339	3131	3131	3131	1.06	1528	48.8	809	25.84
27	ERG_HUMAN.H11MO.0.A	RRRSAGGAAGYGG	1.23e-78	2.99e-75	3.89e-72	2425	3131	3131	3131	1.49	1349	43.09	661	21.11
28	VEZF1_HUMAN.H11MO.0.C	GGRRRRGRRGGAGGGGGRGRRR	4.56e-77	1.39e-73	1.81e-70	3041	3131	3131	3131	5.8	1195	38.17	543	17.34
29	MAZ_HUMAN.H11MO.0.A	GGGGGAGGGGGDGRGRRRGRRG	7.8e-77	2.16e-73	2.82e-70	2777	3131	3131	3131	7.06	1099	35.1	470	15.01
30	FLI1_HUMAN.H11MO.1.A	RRRCAGGAAGBRG	5.06e-76	1.14e-72	1.49e-69	2256	3131	3131	3131	1.03	1474	47.08	778	24.85
31	HEY1_HUMAN.H11MO.0.D	KGRCACGTGBCK	2.07e-74	1.41e-71	1.84e-68	682	3131	3131	3131	1.31	506	16.16	97	3.1
32	CR3L2_HUMAN.H11MO.0.D	TGATGACGTGGCA	6.85e-74	4.26e-71	5.55e-68	622	3131	3131	3131	1.05	518	16.54	104	3.32
33	CLOCK_HUMAN.H11MO.0.C	CWGHCACGTGMVVM	3.61e-74	9.9e-71	1.29e-67	2746	3131	3131	3131	2.08	832	26.57	289	9.23
34	ZN770_HUMAN.H11MO.0.C	GGGAGGCYGAGGBRGGAGGATC	2.55e-71	4.1e-68	5.34e-65	1608	3131	3131	3131	65.5	325	10.38	25	0.8
35	EGR2_HUMAN.H11MO.0.A	GRGRRKGWGKGGGHGGRG	8.35e-71	2.25e-67	2.93e-64	2698	3131	3131	3131	3.53	1136	36.28	521	16.64
36	ETS2_HUMAN.H11MO.0.B	RDVRGGAARVRRR	6.02e-71	2.38e-67	3.1e-64	3953	3131	3131	3131	2.69	1396	44.59	733	23.41
37	E2F7_HUMAN.H11MO.0.B	GDGGCGGGAARDR	1.36e-70	3.98e-67	5.18e-64	2923	3131	3131	3131	2.92	1018	32.51	432	13.8
38	IRF3_HUMAN.H11MO.0.B	RAAARGGAAAVDGAAASDGA	4.28e-70	8.99e-67	1.17e-63	2099	3131	3131	3131	1.14	1374	43.88	718	22.93
39	ZN394_HUMAN.H11MO.1.D	GAAWGGAAW	4.7e-70	1.6e-66	2.08e-63	3398	3131	3131	3131	1.01	2046	65.35	1352	43.18
40	BC11A_HUMAN.H11MO.0.A	RAAAGAGGAAGTGARAV	5.99e-70	1.97e-66	2.57e-63	3295	3131	3131	3131	2.54	1297	41.42	654	20.89
41	ZN467_HUMAN.H11MO.0.C	GGGGAGGGGRRGGRGRRGGRRR	1.72e-68	3.27e-65	4.26e-62	1902	3131	3131	3131	4.08	938	29.96	381	12.17
42	KLF15_HUMAN.H11MO.0.A	RGGGMGGRGVDGGGGGRGG	1.67e-65	3.45e-62	4.49e-59	2061	3131	3131	3131	1.17	1331	42.51	702	22.42
43	WT1_HUMAN.H11MO.0.C	RGGVGGGGGAGGRGGVGGRG	1.88e-63	3.72e-60	4.84e-57	1977	3131	3131	3131	7.12	804	25.68	304	9.71
44	ETV7_HUMAN.H11MO.0.D	VAGGAAR	1.21e-63	4.7e-60	6.12e-57	3883	3131	3131	3131	1.73	1856	59.28	1193	38.1
45	MYC_HUMAN.H11MO.0.A	RCCACGTGCTB	4.6e-62	5.94e-59	7.74e-56	1293	3131	3131	3131	1.12	870	27.79	355	11.34
46	NFAC1_HUMAN.H11MO.0.B	AWGGAAARWVWGAMW	1.67e-61	5.29e-58	6.88e-55	3174	3131	3131	3131	2	1355	43.28	741	23.67
47	ZN263_HUMAN.H11MO.0.A	GGGAGGAGGRRGRGGRGGRR	3.25e-61	6.95e-58	9.05e-55	2142	3131	3131	3131	1.18	1365	43.6	751	23.99
48	STAT1_HUMAN.H11MO.1.A	RRRAAAADGAAASTRAAAV	4.22e-61	7.81e-58	1.02e-54	1850	3131	3131	3131	2.26	942	30.09	411	13.13
49	PATZ1_HUMAN.H11MO.0.C	GGGGMGGGGGMKGGRRVGGVRG	3.17e-61	8.86e-58	1.15e-54	2795	3131	3131	3131	14	749	23.92	274	8.75
50	ZN341_HUMAN.H11MO.0.C	GRGGRRRRGGRGRRGGAASAGC	8.05e-60	2.31e-56	3.01e-53	2872	3131	3131	3131	9.4	792	25.3	308	9.84
51	NFAT5_HUMAN.H11MO.0.D	RRRGGAARRDN	2.71e-59	1.08e-55	1.41e-52	4001	3131	3131	3131	2.66	1449	46.28	834	26.64
52	TAF1_HUMAN.H11MO.0.A	RARRWGGCGGMGGMGR	5.05e-59	1.27e-55	1.65e-52	2512	3131	3131	3131	1.06	1555	49.66	931	29.73
53	MXI1_HUMAN.H11MO.1.A	SCCACGTGSYB	8.45e-59	1.61e-55	2.1e-52	1910	3131	3131	3131	1.18	1120	35.77	558	17.82
54	EGR1_HUMAN.H11MO.0.A	VDRDGCGKGGGYGGRRR	1.3e-58	3.35e-55	4.36e-52	2579	3131	3131	3131	5.78	754	24.08	286	9.13
55	BATF_HUMAN.H11MO.1.A	DATGAYKCAAH	3.47e-58	6.54e-55	8.52e-52	1883	3131	3131	3131	1.89	912	29.13	400	12.78
56	PRDM6_HUMAN.H11MO.0.C	RRRARGAAAAAAA	8.31e-58	2.45e-54	3.2e-51	2953	3131	3131	3131	3.55	1063	33.95	517	16.51
57	MXI1_HUMAN.H11MO.0.A	VCACGTGGSNGSBGS	3.86e-57	6.94e-54	9.04e-51	1800	3131	3131	3131	2.26	732	23.38	276	8.82
58	SP4_HUMAN.H11MO.0.A	SRGVARGRGGCGGRGCHDRR	7.34e-56	1.93e-52	2.51e-49	2630	3131	3131	3131	3.84	996	31.81	473	15.11
59	ETS1_HUMAN.H11MO.0.A	RRRCMGGAAGTGG	1.94e-55	3.54e-52	4.61e-49	1821	3131	3131	3131	1.47	1013	32.35	488	15.59
60	E2F3_HUMAN.H11MO.0.A	DDGGCGGGAAA	1.52e-55	4.72e-52	6.14e-49	3101	3131	3131	3131	2.16	1082	34.56	542	17.31
61	NFE2_HUMAN.H11MO.0.A	VVRTGACTCAGCA	7.34e-54	8.95e-51	1.17e-47	1219	3131	3131	3131	1.61	689	22.01	258	8.24
62	ELF5_HUMAN.H11MO.0.A	VGRASSAGGAAGTRV	8.68e-53	1.66e-49	2.15e-46	1906	3131	3131	3131	1.15	1173	37.46	629	20.09
63	SP4_HUMAN.H11MO.1.A	GRRRGGGGMGGGGCBK	3.47e-52	7.19e-49	9.36e-46	2074	3131	3131	3131	9.42	617	19.71	216	6.9
64	FOXG1_HUMAN.H11MO.0.D	DTTGTTTAYDTWTDTTT	1.41e-51	2.3e-48	2.99e-45	1628	3131	3131	3131	1.38	985	31.46	483	15.43
65	EGR2_HUMAN.H11MO.1.A	GRDGHGKGGGHGGRGG	1.26e-51	2.93e-48	3.82e-45	2327	3131	3131	3131	5.34	784	25.04	332	10.6
66	ETV2_HUMAN.H11MO.0.B	RRARRCAGGAARYRGS	3.88e-51	5.27e-48	6.87e-45	1360	3131	3131	3131	1.11	902	28.81	421	13.45
67	KLF6_HUMAN.H11MO.0.A	GSRRGGGHGGGGMHGGGRV	8.45e-51	2.53e-47	3.29e-44	2993	3131	3131	3131	7.16	840	26.83	376	12.01
68	BACH2_HUMAN.H11MO.0.A	TGCTGAGTCAB	3.49e-50	5.53e-47	7.2e-44	1583	3131	3131	3131	3.53	576	18.4	196	6.26
69	TBX15_HUMAN.H11MO.0.D	GGGGGGGGGGGGGTGGGDR	5.42e-50	1.22e-46	1.59e-43	2259	3131	3131	3131	2.8	1102	35.2	584	18.65
70	FOXP1_HUMAN.H11MO.0.A	TBTGTTTMY	2.8e-48	7.5e-45	9.76e-42	2682	3131	3131	3131	1.38	1360	43.44	813	25.97
71	STAT2_HUMAN.H11MO.0.A	RRGRAAAHGAAACTGAAAV	9.4e-47	9.8e-44	1.28e-40	1042	3131	3131	3131	1.39	683	21.81	279	8.91
72	PURA_HUMAN.H11MO.0.D	GGWRKKGGDGGGCVKGG	2.07e-46	5.89e-43	7.66e-40	2838	3131	3131	3131	2.02	1304	41.65	774	24.72
73	ZN281_HUMAN.H11MO.0.A	RGGWGGGGGAGGGGV	1.94e-45	3.54e-42	4.61e-39	1828	3131	3131	3131	4.21	779	24.88	353	11.27
74	SP2_HUMAN.H11MO.0.A	GGSSVGGGGGCGGGGCCDGSGS	2.18e-45	4.38e-42	5.7e-39	2011	3131	3131	3131	26.1	462	14.76	140	4.47
75	FOXK1_HUMAN.H11MO.0.A	TGTTTMCHTT	4.24e-44	1.16e-40	1.51e-37	2733	3131	3131	3131	2	1054	33.66	574	18.33
76	SP3_HUMAN.H11MO.0.B	SGVVGGGGGCGGGGCBRGSS	5.21e-43	1.31e-39	1.7e-36	2510	3131	3131	3131	44.5	385	12.3	102	3.26
77	MEF2C_HUMAN.H11MO.0.A	DKCTATTTTTRGM	1.28e-42	1.7e-39	2.22e-36	1334	3131	3131	3131	1.3	795	25.39	377	12.04
78	MEF2A_HUMAN.H11MO.0.A	DKCTATTTTTRGM	1.25e-42	1.71e-39	2.23e-36	1371	3131	3131	3131	2.29	616	19.67	248	7.92
79	ZSC22_HUMAN.H11MO.0.C	RGKCWGAGGGMGGAGG	1.42e-42	2.56e-39	3.33e-36	1805	3131	3131	3131	1.12	1126	35.96	642	20.5
80	BACH1_HUMAN.H11MO.0.A	TGCTGAGTCABSS	1.63e-42	2.61e-39	3.39e-36	1602	3131	3131	3131	1.38	887	28.33	448	14.31
81	TFDP1_HUMAN.H11MO.0.C	RRRRGGCGGGAARN	1.28e-42	2.71e-39	3.52e-36	2111	3131	3131	3131	2.48	791	25.26	374	11.95
82	HMGA1_HUMAN.H11MO.0.D	NWATTTT	1.05e-42	2.94e-39	3.83e-36	2811	3131	3131	3131	2.34	839	26.8	410	13.09
83	NF2L2_HUMAN.H11MO.0.A	WWYTGCTGAGTCAT	1.28e-41	8.56e-39	1.11e-35	669	3131	3131	3131	1.14	483	15.43	164	5.24
84	KLF16_HUMAN.H11MO.0.D	GGGGGYGKGKBGGGGGGGG	6.84e-42	1.51e-38	1.97e-35	2212	3131	3131	3131	4.49	915	29.22	473	15.11
85	ZN394_HUMAN.H11MO.0.C	NRARWRGAAWNGAMWGRAAK	9.32e-42	2.81e-38	3.66e-35	3018	3131	3131	3131	1.93	1328	42.41	822	26.25
86	KLF1_HUMAN.H11MO.0.A	DGGGYGKGGCYGGG	1.98e-41	3.72e-38	4.84e-35	1882	3131	3131	3131	24.5	343	10.95	83	2.65
87	ZN121_HUMAN.H11MO.0.C	CTGGGCAACABAGYRAGACC	1.79e-40	5.71e-38	7.44e-35	319	3131	3131	3131	44.5	150	4.79	4	0.13
88	ZN770_HUMAN.H11MO.1.C	DGGAGGCYGRG	5.71e-41	9.08e-38	1.18e-34	1592	3131	3131	3131	45.4	222	7.09	27	0.86
89	SMAD3_HUMAN.H11MO.0.B	SYCTSHCWSCWS	3.59e-41	1.68e-37	2.19e-34	4685	3131	3131	3131	2.97	1144	36.54	665	21.24
90	KLF3_HUMAN.H11MO.0.B	GGRGVDGGGCGGGGCYGGG	1.18e-40	2.4e-37	3.13e-34	2035	3131	3131	3131	21.7	426	13.61	132	4.22
91	SP2_HUMAN.H11MO.1.B	RGGRGGCGGGGC	4.69e-40	9.47e-37	1.23e-33	2018	3131	3131	3131	8.02	540	17.25	206	6.58
92	ELF3_HUMAN.H11MO.0.A	RAABVAGGAAGTRR	1.13e-39	1.65e-36	2.15e-33	1467	3131	3131	3131	1.42	831	26.54	418	13.35
93	CPEB1_HUMAN.H11MO.0.D	TTTTTATTYTTTTTTTT	3.42e-39	2.75e-36	3.58e-33	803	3131	3131	3131	1.15	571	18.24	230	7.35
94	ELF2_HUMAN.H11MO.0.C	RAVCCGGAAGTGR	4.6e-39	6.73e-36	8.76e-33	1462	3131	3131	3131	1.21	872	27.85	453	14.47
95	E2F6_HUMAN.H11MO.0.A	DGGGCGGGARRVR	2.74e-39	6.96e-36	9.06e-33	2536	3131	3131	3131	2.68	910	29.06	482	15.39
96	SRBP1_HUMAN.H11MO.0.A	DGTSRGGTGAB	8.05e-39	2.23e-35	2.9e-32	2765	3131	3131	3131	2.42	873	27.88	455	14.53
97	VEZF1_HUMAN.H11MO.1.C	RRRRGGAGGGGR	1.73e-38	7.11e-35	9.26e-32	4101	3131	3131	3131	2.65	1494	47.72	994	31.75
98	IRF1_HUMAN.H11MO.0.A	RAAANWGAAASTGAAASYRR	2.47e-37	2.36e-34	3.07e-31	954	3131	3131	3131	1.58	601	19.2	258	8.24
99	MEF2D_HUMAN.H11MO.0.A	DKCTATTTTTAG	2.97e-37	2.83e-34	3.69e-31	954	3131	3131	3131	1.37	569	18.17	236	7.54
100	HXC10_HUMAN.H11MO.0.D	WWWWWWWNNWTTTWATKRC	1.97e-37	3.44e-34	4.48e-31	1749	3131	3131	3131	2.84	724	23.12	347	11.08
101	SP1_HUMAN.H11MO.0.A	VGGGGGCGGGGCCKGGGGGGGG	1.42e-36	1.11e-33	1.45e-30	785	3131	3131	3131	11.5	334	10.67	90	2.87
102	KLF5_HUMAN.H11MO.0.A	WGGGTGKGGCDGGG	5.58e-37	1.43e-33	1.87e-30	2568	3131	3131	3131	2.23	1146	36.6	691	22.07
103	PO3F3_HUMAN.H11MO.0.D	WWWAWTTATGCWWATTW	1.14e-36	2.16e-33	2.81e-30	1894	3131	3131	3131	1.05	1175	37.53	718	22.93
104	FEV_HUMAN.H11MO.0.B	GCVGGAAGYG	8.78e-37	3.33e-33	4.34e-30	3797	3131	3131	3131	1.55	1416	45.23	933	29.8
105	HXD12_HUMAN.H11MO.0.D	DDTTTTAHKRN	3.1e-36	7.04e-33	9.17e-30	2272	3131	3131	3131	1.38	1135	36.25	686	21.91
106	XBP1_HUMAN.H11MO.0.D	GSKGACGTGGC	1.15e-35	1.72e-32	2.24e-29	1500	3131	3131	3131	1.02	959	30.63	541	17.28
107	MAZ_HUMAN.H11MO.1.A	RRGGGAGGGGS	7.79e-36	1.72e-32	2.24e-29	2208	3131	3131	3131	3.19	965	30.82	545	17.41
108	MEF2B_HUMAN.H11MO.0.A	DKKKCTATTTTTRG	1.18e-35	1.98e-32	2.58e-29	1686	3131	3131	3131	2.24	685	21.88	326	10.41
109	ZFP28_HUMAN.H11MO.0.C	TTCTATTTCTTCTTGWGTCA	9.19e-35	5.42e-32	7.06e-29	590	3131	3131	3131	3.01	322	10.28	88	2.81
110	ELF1_HUMAN.H11MO.0.A	VRACCCGGAAGTGS	2.3e-34	2.94e-31	3.83e-28	1281	3131	3131	3131	1.27	747	23.86	379	12.1
111	TBX1_HUMAN.H11MO.0.D	GGGYGGGYAGGGGTGGGMDD	2.56e-34	3.66e-31	4.76e-28	1430	3131	3131	3131	1.51	850	27.15	460	14.69
112	ARNT_HUMAN.H11MO.0.B	STACGTGMC	9.38e-34	8.36e-31	1.09e-27	891	3131	3131	3131	1.02	608	19.42	278	8.88
113	ZN713_HUMAN.H11MO.0.D	RWAGAARAADGVSANGMAA	5.22e-34	1.07e-30	1.39e-27	2054	3131	3131	3131	1.24	1156	36.92	718	22.93
114	HSF1_HUMAN.H11MO.1.A	TTCTGGAAR	5.47e-34	1.24e-30	1.62e-27	2274	3131	3131	3131	1.02	1365	43.6	905	28.9
115	FOXD3_HUMAN.H11MO.0.D	KBTGTTTNCWTWRBH	8.42e-34	2.58e-30	3.36e-27	3071	3131	3131	3131	1.44	1419	45.32	956	30.53
116	E2F4_HUMAN.H11MO.0.A	SRGGGCGGGAARD	2.85e-33	4.66e-30	6.07e-27	1637	3131	3131	3131	1.03	1025	32.74	610	19.48
117	SALL4_HUMAN.H11MO.0.B	GSDGGGWGGG	1.89e-33	7.03e-30	9.15e-27	3727	3131	3131	3131	2.01	1636	52.25	1164	37.18
118	EPAS1_HUMAN.H11MO.0.B	VTACGTGMC	1.29e-32	9.53e-30	1.24e-26	741	3131	3131	3131	1.02	518	16.54	219	6.99
119	ZN148_HUMAN.H11MO.0.D	KGRGKGGGGGAGGGG	5.71e-33	1.21e-29	1.58e-26	2126	3131	3131	3131	16.9	533	17.02	228	7.28
120	ZFX_HUMAN.H11MO.1.A	DGVRGVVSAGGCCKVGG	4.82e-33	1.44e-29	1.88e-26	2996	3131	3131	3131	1.99	1314	41.97	865	27.63
121	ARI3A_HUMAN.H11MO.0.D	RATTAAWBRRWATCAAAWTWWA	1.1e-31	6.54e-29	8.51e-26	593	3131	3131	3131	1.31	425	13.57	160	5.11
122	SOX10_HUMAN.H11MO.1.A	BBYCTTTGTTYYY	2.58e-32	8.99e-29	1.17e-25	3477	3131	3131	3131	3.06	1051	33.57	638	20.38
123	MAFK_HUMAN.H11MO.1.A	TGCTGAGTCAGCA	8.37e-32	1.21e-28	1.57e-25	1441	3131	3131	3131	1.52	729	23.28	378	12.07
124	SPIC_HUMAN.H11MO.0.D	KVDRRWGGGKDRG	5.11e-32	2.23e-28	2.91e-25	4365	3131	3131	3131	2.38	1180	37.69	752	24.02
125	HXA11_HUMAN.H11MO.0.D	TWAADTTTTAYGR	2.29e-31	3.83e-28	4.99e-25	1676	3131	3131	3131	1.28	947	30.25	556	17.76
126	FOXF1_HUMAN.H11MO.0.D	WTGTTTATTTW	7.34e-31	7.81e-28	1.02e-24	1065	3131	3131	3131	1.09	689	22.01	352	11.24
127	HXD11_HUMAN.H11MO.0.D	DWTTTATKRHN	4.67e-31	1.05e-27	1.36e-24	2243	3131	3131	3131	1.5	1023	32.67	622	19.87
128	ZFP82_HUMAN.H11MO.0.C	TTCCADTTCAYTAATTYTCTCTTC	9.06e-31	1.15e-27	1.49e-24	1266	3131	3131	3131	1.51	792	25.3	433	13.83
129	EHF_HUMAN.H11MO.0.B	VWACSAGGAAGTDVS	1.54e-30	1.86e-27	2.42e-24	1208	3131	3131	3131	1.08	769	24.56	416	13.29
130	FOXO1_HUMAN.H11MO.0.A	KBBYTGTTTHCN	6.24e-31	1.9e-27	2.47e-24	3040	3131	3131	3131	1.55	1311	41.87	877	28.01
131	FOXJ2_HUMAN.H11MO.0.C	TGTTTRTTTW	1.85e-30	2.3e-27	2.99e-24	1242	3131	3131	3131	1.4	729	23.28	385	12.3
132	PAX5_HUMAN.H11MO.0.A	SCSKGGGCARCVRAGCGWGAC	3.22e-30	3.01e-27	3.92e-24	934	3131	3131	3131	15.3	192	6.13	32	1.02
133	SP1_HUMAN.H11MO.1.A	VGGGGGCGGGGCCK	2.39e-30	3.51e-27	4.57e-24	1470	3131	3131	3131	48.5	188	6	30	0.96
134	FOXJ3_HUMAN.H11MO.0.A	TTGTTTATKKTTW	7.79e-30	5.26e-27	6.85e-24	676	3131	3131	3131	4.65	302	9.65	90	2.87
135	ATF6A_HUMAN.H11MO.0.B	GKGSTGACGTGG	1.48e-29	5.26e-27	6.85e-24	355	3131	3131	3131	1.04	276	8.82	76	2.43
136	NF2L1_HUMAN.H11MO.0.C	HGTCATN	2.68e-30	7.01e-27	9.13e-24	2615	3131	3131	3131	1.63	874	27.91	502	16.03
137	E2F1_HUMAN.H11MO.0.A	RRNKGGCGGGAARR	5.84e-30	9.53e-27	1.24e-23	1632	3131	3131	3131	1.84	732	23.38	390	12.46
138	NFKB1_HUMAN.H11MO.0.A	AGGGAAAK	2.61e-30	9.99e-27	1.3e-23	3829	3131	3131	3131	2.53	1176	37.56	760	24.27
139	PROX1_HUMAN.H11MO.0.D	KGGKARGGCGKSKKGGG	1.33e-29	3.76e-26	4.9e-23	2824	3131	3131	3131	2	1132	36.15	726	23.19
140	KLF12_HUMAN.H11MO.0.C	VGGGGCGGGGC	7.2e-29	1.02e-25	1.33e-22	1415	3131	3131	3131	1.8	713	22.77	381	12.17
141	FUBP1_HUMAN.H11MO.0.D	TYGTNTTTTTTT	1.05e-28	1.97e-25	2.57e-22	1883	3131	3131	3131	2.04	780	24.91	435	13.89
142	ZN554_HUMAN.H11MO.1.D	GCWGAGYCA	6.96e-29	2.04e-25	2.66e-22	2932	3131	3131	3131	1.02	1674	53.47	1236	39.48
143	GABPA_HUMAN.H11MO.0.A	GVVRCCGGAAGTGV	3.33e-28	3.47e-25	4.52e-22	1041	3131	3131	3131	1.2	632	20.19	322	10.28
144	ANDR_HUMAN.H11MO.0.A	TGTTCTTKKYTGTTTRYW	3.94e-28	6.35e-25	8.27e-22	1612	3131	3131	3131	1.43	863	27.56	506	16.16
145	SUH_HUMAN.H11MO.0.A	VSYSTGGGAAV	2.86e-28	8.69e-25	1.13e-21	3043	3131	3131	3131	1.07	1671	53.37	1238	39.54
146	NFAC2_HUMAN.H11MO.0.B	TGGAAAAWY	3.2e-27	7.38e-24	9.61e-21	2309	3131	3131	3131	1.02	1355	43.28	945	30.18
147	ETV1_HUMAN.H11MO.0.A	SRCCGGAAGYG	1.74e-26	2.49e-23	3.24e-20	1428	3131	3131	3131	1.41	734	23.44	411	13.13
148	WT1_HUMAN.H11MO.1.B	GWGGGAGGAGS	2.04e-26	6.61e-23	8.61e-20	3246	3131	3131	3131	5.32	731	23.35	409	13.06
149	LYL1_HUMAN.H11MO.0.A	CCAKCTGYTYYCTB	6.44e-26	2.63e-22	3.42e-19	4082	3131	3131	3131	1.45	1708	54.55	1294	41.33
150	NFAC1_HUMAN.H11MO.1.B	AATGGAAAAW	1.41e-25	3.21e-22	4.18e-19	2283	3131	3131	3131	1.04	1327	42.38	932	29.77
151	STAT3_HUMAN.H11MO.0.A	SAYTTCCMRGAA	2.81e-25	4.45e-22	5.8e-19	1583	3131	3131	3131	1.04	963	30.76	609	19.45
152	FOXM1_HUMAN.H11MO.0.A	TGTTTRCTYWKB	2.11e-25	4.86e-22	6.33e-19	2300	3131	3131	3131	2.21	773	24.69	449	14.34
153	PATZ1_HUMAN.H11MO.1.C	AGGGAGGGG	1.78e-25	6.53e-22	8.5e-19	3669	3131	3131	3131	1.7	1635	52.22	1226	39.16
154	BATF_HUMAN.H11MO.0.A	RBTYTCRDWATGASTCAB	1.26e-24	1.63e-21	2.13e-18	1293	3131	3131	3131	1.35	709	22.64	402	12.84
155	TBX21_HUMAN.H11MO.0.A	GDGDRGGTGTGRV	4.93e-25	1.86e-21	2.43e-18	3784	3131	3131	3131	1.56	1444	46.12	1046	33.41
156	GATA3_HUMAN.H11MO.0.A	RVAGATAAVAD	8.66e-25	2e-21	2.61e-18	2312	3131	3131	3131	1.09	1292	41.26	906	28.94
157	NFAC4_HUMAN.H11MO.0.C	WGGAAAAYTW	3.25e-24	8.16e-21	1.06e-17	2511	3131	3131	3131	1.03	1442	46.06	1051	33.57
158	Z354A_HUMAN.H11MO.0.C	RTTTARWYCATTTACATTTAATGT	9.22e-24	9.38e-21	1.22e-17	1018	3131	3131	3131	1.77	596	19.04	318	10.16
159	FOXP2_HUMAN.H11MO.0.C	BTGTTTACH	5.25e-24	9.42e-21	1.23e-17	1793	3131	3131	3131	1.79	718	22.93	413	13.19
160	SPI1_HUMAN.H11MO.0.A	RRAAAGAGGAAGTGRVD	1.72e-23	1.97e-20	2.56e-17	1144	3131	3131	3131	1.11	719	22.96	417	13.32
161	KLF4_HUMAN.H11MO.0.A	WGGGYGKGGC	1.77e-23	2.97e-20	3.86e-17	1678	3131	3131	3131	8.09	397	12.68	173	5.53
162	IRF7_HUMAN.H11MO.0.C	GAAASYGAAA	1.72e-23	3.84e-20	5e-17	2237	3131	3131	3131	1.05	1287	41.11	912	29.13
163	FOXO3_HUMAN.H11MO.0.B	BYTGTTTACH	4.58e-23	7.13e-20	9.28e-17	1555	3131	3131	3131	1.64	712	22.74	414	13.22
164	RXRA_HUMAN.H11MO.0.A	VRGDVRGNVARAGGTCARRG	2.83e-23	9.72e-20	1.27e-16	3430	3131	3131	3131	1.95	1356	43.31	978	31.24
165	RARA_HUMAN.H11MO.1.A	VAGGTCAGRG	8.96e-23	2.5e-19	3.25e-16	2788	3131	3131	3131	3.85	680	21.72	390	12.46
166	FOXL1_HUMAN.H11MO.0.D	TKTTTGTTTRTTTAYWTTT	3.95e-21	4.63e-19	6.02e-16	117	3131	3131	3131	2.13	97	3.1	8	0.26
167	IRF8_HUMAN.H11MO.0.B	RAAARRGGAASTGAAASTDR	5.98e-22	5.6e-19	7.29e-16	935	3131	3131	3131	1.59	519	16.58	269	8.59
168	IRF2_HUMAN.H11MO.0.A	RAAAVHGAAAGTGAAASTRV	1.11e-21	7.24e-19	9.42e-16	651	3131	3131	3131	1.19	439	14.02	211	6.74
169	STAT1_HUMAN.H11MO.0.A	YCCVTTTCCHGGAAAWCHC	1.38e-21	1.2e-18	1.56e-15	868	3131	3131	3131	1.26	523	16.7	274	8.75
170	COT1_HUMAN.H11MO.0.C	GRGGKSARAGGTCAGGG	8.8e-22	2.24e-18	2.91e-15	2544	3131	3131	3131	1.07	1448	46.25	1078	34.43
171	STA5A_HUMAN.H11MO.0.A	TTCYRRGAAR	1.84e-21	2.25e-18	2.94e-15	1226	3131	3131	3131	1.07	742	23.7	449	14.34
172	FOXA1_HUMAN.H11MO.0.A	TGTTTACWYWGB	2.81e-21	3.41e-18	4.44e-15	1215	3131	3131	3131	2.53	501	16	259	8.27
173	PRDM1_HUMAN.H11MO.0.A	RAAAGTGAAAGTGR	3.31e-21	5.46e-18	7.1e-15	1646	3131	3131	3131	1.09	971	31.01	646	20.63
174	FOXJ3_HUMAN.H11MO.1.B	TKKTTWWTGTTTA	1.74e-20	1.08e-17	1.41e-14	620	3131	3131	3131	1.73	371	11.85	168	5.37
175	ITF2_HUMAN.H11MO.0.C	DGCAGSTGKS	1.25e-20	4.02e-17	5.23e-14	3211	3131	3131	3131	1.01	1788	57.11	1422	45.42
176	HXC12_HUMAN.H11MO.0.D	DTTTTAYKACYT	4.05e-20	4.7e-17	6.12e-14	1161	3131	3131	3131	1.12	675	21.56	403	12.87
177	ELK1_HUMAN.H11MO.0.B	RCCGGAAGTGV	6.19e-20	5.51e-17	7.17e-14	889	3131	3131	3131	1.04	565	18.05	316	10.09
178	FOXF2_HUMAN.H11MO.0.D	TGTTTACHTWD	1.71e-19	1.91e-16	2.48e-13	1114	3131	3131	3131	2.29	447	14.28	228	7.28
179	KLF9_HUMAN.H11MO.0.C	GRRGKGGGCGTGGCC	2.18e-19	2.04e-16	2.66e-13	937	3131	3131	3131	15.3	210	6.71	67	2.14
180	NFIC_HUMAN.H11MO.0.A	CYTGGCHBYMWGCCARG	1.11e-19	2.73e-16	3.55e-13	2450	3131	3131	3131	14.5	276	8.82	107	3.42
181	STA5B_HUMAN.H11MO.0.A	YTTCYKRGAAAY	2.03e-19	3.07e-16	4e-13	1511	3131	3131	3131	2.36	547	17.47	305	9.74
182	HIF1A_HUMAN.H11MO.0.C	GDACGTGM	3.4e-19	3.43e-16	4.46e-13	1008	3131	3131	3131	1.01	633	20.22	375	11.98
183	MNX1_HUMAN.H11MO.0.D	MBATTTDHWTHWCYHYTHH	1.97e-19	5.07e-16	6.6e-13	2575	3131	3131	3131	3.01	630	20.12	371	11.85
184	RORG_HUMAN.H11MO.0.C	RRAASTRGGTCA	2.87e-19	5.12e-16	6.67e-13	1781	3131	3131	3131	1.78	685	21.88	417	13.32
185	FOXD2_HUMAN.H11MO.0.D	WAWGTAAATRTTWWYTTAA	5.22e-18	1.39e-15	1.81e-12	266	3131	3131	3131	2.13	159	5.08	42	1.34
186	ARNT2_HUMAN.H11MO.0.D	GNCGTGGSASRC	9.26e-19	1.98e-15	2.58e-12	2141	3131	3131	3131	1.05	1214	38.77	886	28.3
187	IRX2_HUMAN.H11MO.0.D	RCDKGKBDKGDCRKGTDVK	1.39e-18	3.18e-15	4.14e-12	2293	3131	3131	3131	1.5	907	28.97	611	19.51
188	SRY_HUMAN.H11MO.0.B	YWTTGTTTH	1.88e-18	4.8e-15	6.25e-12	2558	3131	3131	3131	2.29	839	26.8	553	17.66
189	RUNX2_HUMAN.H11MO.0.A	KGKYTGTGGTTTKK	2.91e-18	5.95e-15	7.75e-12	2046	3131	3131	3131	1.03	1183	37.78	862	27.53
190	RUNX1_HUMAN.H11MO.0.A	BYTGTGGTTWB	7.04e-18	1.04e-14	1.36e-11	1479	3131	3131	3131	3.64	418	13.35	215	6.87
191	SMCA5_HUMAN.H11MO.0.C	GAATBGAATGGAAWC	1.02e-17	1.37e-14	1.79e-11	1348	3131	3131	3131	1.83	550	17.57	318	10.16
192	HES1_HUMAN.H11MO.0.D	VMGVCACGMGMCM	8.68e-18	1.55e-14	2.02e-11	1784	3131	3131	3131	1.25	880	28.11	594	18.97
193	SMAD2_HUMAN.H11MO.0.A	TGTCTGNCWCCT	7.76e-18	1.98e-14	2.57e-11	2548	3131	3131	3131	1.21	1284	41.01	960	30.66
194	Z324A_HUMAN.H11MO.0.C	KVTCAAACCATCCTTKSCTKSCW	1.06e-17	2.01e-14	2.62e-11	1893	3131	3131	3131	1.46	953	30.44	659	21.05
195	HEY2_HUMAN.H11MO.0.D	GKBGGCWCGTGGCHTBV	3.22e-17	2.22e-14	2.88e-11	689	3131	3131	3131	1.11	437	13.96	233	7.44
196	HES5_HUMAN.H11MO.0.D	YGGCACGTGYCR	1.64e-16	2.27e-14	2.95e-11	138	3131	3131	3131	1.04	115	3.67	23	0.73
197	KLF14_HUMAN.H11MO.0.D	DRGKGGGCGTGGY	3.97e-17	3.11e-14	4.05e-11	784	3131	3131	3131	11.9	162	5.17	46	1.47
198	ZN554_HUMAN.H11MO.0.C	GCWGAGYCANGTRGDKKRCT	2.88e-17	4.85e-14	6.32e-11	1682	3131	3131	3131	1.07	988	31.56	694	22.17
199	SMCA1_HUMAN.H11MO.0.C	CMARGAAGMATD	2.74e-17	7.46e-14	9.71e-11	2723	3131	3131	3131	1.03	1517	48.45	1188	37.94
200	ESR2_HUMAN.H11MO.1.A	AGGTCAS	3.37e-17	7.9e-14	1.03e-10	2345	3131	3131	3131	3.49	588	18.78	352	11.24
201	ZF64A_HUMAN.H11MO.0.D	GGGGCCCGGGAMYCDG	4.44e-17	7.91e-14	1.03e-10	1781	3131	3131	3131	1.45	888	28.36	607	19.39
202	ELK4_HUMAN.H11MO.0.A	SVCCGGAAGTGV	1.31e-16	1.1e-13	1.43e-10	836	3131	3131	3131	1.09	512	16.35	295	9.42
203	NR1D1_HUMAN.H11MO.0.B	RRRNMASTGGGTCAGDRDR	7.1e-17	2.09e-13	2.72e-10	2942	3131	3131	3131	1.11	1572	50.21	1246	39.8
204	BHE41_HUMAN.H11MO.0.D	WSVRKSYCACGTGMWGRRRV	2.52e-16	2.19e-13	2.85e-10	867	3131	3131	3131	2.76	365	11.66	184	5.88
205	FOXA2_HUMAN.H11MO.0.A	TGTTTACWYWGB	2.85e-16	3.13e-13	4.07e-10	1098	3131	3131	3131	1.24	613	19.58	379	12.1
206	IRF4_HUMAN.H11MO.0.A	RAAWGRGGAASTGAAASY	3.32e-16	3.48e-13	4.53e-10	1048	3131	3131	3131	1.11	639	20.41	401	12.81
207	PITX2_HUMAN.H11MO.0.D	TKGGATTAVH	2.99e-16	4.74e-13	6.17e-10	1582	3131	3131	3131	9.11	145	4.63	39	1.25
208	DLX1_HUMAN.H11MO.0.D	WWWWWTATGSTAATTA	3.8e-16	5.42e-13	7.06e-10	1426	3131	3131	3131	1.07	840	26.83	573	18.3
209	SRBP2_HUMAN.H11MO.0.B	VSGTGGGGWGABG	3.11e-16	1.08e-12	1.41e-09	3492	3131	3131	3131	1.88	1252	39.99	946	30.21
210	EGR4_HUMAN.H11MO.0.D	GGSGGYRGGGM	8.92e-16	1.14e-12	1.48e-09	1274	3131	3131	3131	1.46	665	21.24	426	13.61
211	OSR2_HUMAN.H11MO.0.C	GBYSCWGCTNCTGYDG	5.94e-16	1.35e-12	1.76e-09	2273	3131	3131	3131	3.9	565	18.05	342	10.92
212	COT1_HUMAN.H11MO.1.C	BSARAGGTCAGRG	8.26e-16	2.01e-12	2.62e-09	2434	3131	3131	3131	1.42	1141	36.44	847	27.05
213	CREB3_HUMAN.H11MO.0.D	KGRTGACGTGGCA	1.4e-14	2.42e-12	3.16e-09	173	3131	3131	3131	1.05	135	4.31	38	1.21
214	TEAD3_HUMAN.H11MO.0.D	GAHATTYYWGCYBYW	1.78e-15	2.61e-12	3.39e-09	1463	3131	3131	3131	1.13	823	26.29	564	18.01
215	PTF1A_HUMAN.H11MO.0.B	SCAGCTGBYBBYBYYCHC	1.24e-15	2.69e-12	3.5e-09	2167	3131	3131	3131	1.5	1031	32.93	748	23.89
216	AP2D_HUMAN.H11MO.0.D	CGCCYGVGGCSCGT	5.72e-15	4.37e-12	5.69e-09	764	3131	3131	3131	1.06	482	15.39	282	9.01
217	BATF3_HUMAN.H11MO.0.B	BRSTTTCADTWTGASWM	3.19e-15	5.02e-12	6.53e-09	1574	3131	3131	3131	1.22	833	26.6	575	18.36
218	ZN563_HUMAN.H11MO.1.C	SHRGCAGCWSWG	1.87e-15	5.39e-12	7.02e-09	2877	3131	3131	3131	1.26	1392	44.46	1087	34.72
219	HAND1_HUMAN.H11MO.1.D	KSYCTGG	1.26e-15	5.42e-12	7.06e-09	4293	3131	3131	3131	1.9	1610	51.42	1297	41.42
220	RXRB_HUMAN.H11MO.0.C	TSAGGTCASR	2.57e-15	5.75e-12	7.48e-09	2241	3131	3131	3131	3.16	500	15.97	294	9.39
221	FOXB1_HUMAN.H11MO.0.D	RTMAATRTTTACATAAB	1.5e-14	6.38e-12	8.31e-09	425	3131	3131	3131	1.23	275	8.78	128	4.09
222	LMX1B_HUMAN.H11MO.0.D	TAATTAAHWRMYTWWWWW	1.03e-14	7.84e-12	1.02e-08	762	3131	3131	3131	1.13	466	14.88	271	8.66
223	SPIB_HUMAN.H11MO.0.A	RRAAAGAGGAAGTGARA	1.19e-14	9.1e-12	1.18e-08	762	3131	3131	3131	1.31	449	14.34	258	8.24
224	HNF1A_HUMAN.H11MO.0.C	DGTTAATKATTAACH	9.87e-15	9.49e-12	1.24e-08	962	3131	3131	3131	1.07	587	18.75	369	11.79
225	E2F4_HUMAN.H11MO.1.A	GGCGGGAADTTBNR	8.44e-15	9.87e-12	1.28e-08	1169	3131	3131	3131	1.08	670	21.4	438	13.99
226	ESR1_HUMAN.H11MO.1.A	CHRGGTCASV	4.55e-15	1e-11	1.31e-08	2204	3131	3131	3131	1.37	1060	33.85	780	24.91
227	IKZF1_HUMAN.H11MO.0.C	BTGGGARR	3.34e-15	1.22e-11	1.59e-08	3663	3131	3131	3131	3.85	750	23.95	503	16.07
228	PTF1A_HUMAN.H11MO.1.B	RGCAGCTGG	5.13e-15	1.32e-11	1.72e-08	2576	3131	3131	3131	2.6	792	25.3	541	17.28
229	RUNX3_HUMAN.H11MO.0.A	BYTGTGGTTW	1.09e-14	1.59e-11	2.06e-08	1459	3131	3131	3131	4.39	365	11.66	193	6.16
230	RARG_HUMAN.H11MO.1.B	VAGGTCAS	5.97e-15	1.73e-11	2.25e-08	2888	3131	3131	3131	5.13	422	13.48	235	7.51
231	ELK3_HUMAN.H11MO.0.D	VMCHGGAARTSC	1.8e-14	1.73e-11	2.25e-08	959	3131	3131	3131	1.03	587	18.75	371	11.85
232	RREB1_HUMAN.H11MO.0.D	DKGKKKGKGGKTGKTTTGGGKT	2.58e-14	2.17e-11	2.82e-08	840	3131	3131	3131	2.35	422	13.48	239	7.63
233	CR3L1_HUMAN.H11MO.0.D	GCCACGTGGCA	2.8e-13	2.78e-11	3.61e-08	99	3131	3131	3131	1.08	84	2.68	15	0.48
234	NFAC3_HUMAN.H11MO.0.B	TGGAAAAHY	1.44e-14	2.91e-11	3.79e-08	2021	3131	3131	3131	1.04	1138	36.35	857	27.37
235	BCL6_HUMAN.H11MO.0.A	YKCTTTCYAGGAA	1.95e-14	3.62e-11	4.71e-08	1858	3131	3131	3131	1.37	869	27.75	614	19.61
236	MAFF_HUMAN.H11MO.1.B	TGCTGASTC	2.62e-14	5.98e-11	7.79e-08	2283	3131	3131	3131	1.52	937	29.93	676	21.59
237	ZN350_HUMAN.H11MO.0.C	CAGYYYTTTTATDWCCHR	3.77e-14	9.17e-11	1.19e-07	2429	3131	3131	3131	1.06	1357	43.34	1068	34.11
238	PO4F1_HUMAN.H11MO.0.D	CATTAATTATTCAT	2.04e-13	9.66e-11	1.26e-07	473	3131	3131	3131	1.47	270	8.62	130	4.15
239	FOXC1_HUMAN.H11MO.0.C	CDWTGTTTACTTWRG	3.79e-13	1.45e-10	1.89e-07	384	3131	3131	3131	1.37	237	7.57	108	3.45
240	LMX1A_HUMAN.H11MO.0.D	TAATTAATTWKKTWATTWW	3.22e-13	1.73e-10	2.26e-07	539	3131	3131	3131	1.17	347	11.08	188	6
241	RARB_HUMAN.H11MO.0.D	SAGGTCAVVVV	1.36e-13	2.14e-10	2.78e-07	1569	3131	3131	3131	15.3	183	5.84	70	2.24
242	LEF1_HUMAN.H11MO.0.A	BCCTTTSWWNTBYH	7.23e-14	2.77e-10	3.61e-07	3833	3131	3131	3131	1.67	1517	48.45	1226	39.16
243	COT2_HUMAN.H11MO.1.A	RGRGYCARAGGTCARVR	1.15e-13	2.83e-10	3.69e-07	2469	3131	3131	3131	4.07	514	16.42	317	10.12
244	GSX2_HUMAN.H11MO.0.D	YTAATTRSHWWTTAAT	2.47e-13	3.2e-10	4.17e-07	1297	3131	3131	3131	1.25	694	22.17	471	15.04
245	MAFF_HUMAN.H11MO.0.B	TGCTGASTCAGCABTTTT	2.41e-13	3.95e-10	5.15e-07	1640	3131	3131	3131	1.74	672	21.46	452	14.44
246	TFAP4_HUMAN.H11MO.0.A	YCAGCTGWKB	4.09e-13	5.35e-10	6.96e-07	1306	3131	3131	3131	1.05	763	24.37	533	17.02
247	SOX4_HUMAN.H11MO.0.B	BYCTTTGTYYYB	2.21e-13	5.69e-10	7.41e-07	2574	3131	3131	3131	2.34	890	28.43	643	20.54
248	NKX61_HUMAN.H11MO.0.B	GAYWAATKRSHWWTTAATK	5.07e-13	7.59e-10	9.88e-07	1497	3131	3131	3131	1.34	762	24.34	533	17.02
249	ZFHX3_HUMAN.H11MO.0.D	ATTAWTAATTA	1.77e-12	9.69e-10	1.26e-06	547	3131	3131	3131	1.09	345	11.02	191	6.1
250	ZN322_HUMAN.H11MO.0.B	GWGCCTGSTACWSWGCCTGR	1.1e-12	9.71e-10	1.26e-06	886	3131	3131	3131	1.16	540	17.25	346	11.05
251	BHA15_HUMAN.H11MO.0.B	SSAGCAGCTGG	9.39e-13	1.55e-09	2.02e-06	1648	3131	3131	3131	1.13	904	28.87	662	21.14
252	HAND1_HUMAN.H11MO.0.D	RGSYCTGGYYWNTSTCA	1.07e-12	1.98e-09	2.58e-06	1859	3131	3131	3131	1.2	975	31.14	727	23.22
253	MAFB_HUMAN.H11MO.0.B	TGCTGASTYAD	6.71e-13	2e-09	2.6e-06	2974	3131	3131	3131	1.54	1098	35.07	838	26.76
254	HNF1B_HUMAN.H11MO.0.A	DGTTAATRATTAACH	3.63e-12	2.12e-09	2.76e-06	584	3131	3131	3131	1.59	295	9.42	155	4.95
255	HXB13_HUMAN.H11MO.0.A	TTTTATDGSH	1.62e-12	2.27e-09	2.96e-06	1405	3131	3131	3131	1.08	786	25.1	559	17.85
256	SOX2_HUMAN.H11MO.0.A	BBCCTTTGTYYYB	1.09e-12	2.9e-09	3.77e-06	2649	3131	3131	3131	1.36	1271	40.59	1003	32.03
257	HXA10_HUMAN.H11MO.0.C	KATRRTTTATGW	3e-12	2.91e-09	3.79e-06	968	3131	3131	3131	1.1	562	17.95	368	11.75
258	FOXP3_HUMAN.H11MO.0.D	AATKTGWTT	1.42e-12	3.05e-09	3.97e-06	2146	3131	3131	3131	1.1	1169	37.34	908	29
259	STAT4_HUMAN.H11MO.0.A	YTTCYYRGMAV	1.52e-12	3.36e-09	4.37e-06	2217	3131	3131	3131	2.05	828	26.45	596	19.04
260	ZN282_HUMAN.H11MO.0.D	MGKRTTRTGGGARA	2.13e-12	3.65e-09	4.75e-06	1711	3131	3131	3131	1.03	978	31.24	733	23.41
261	PAX4_HUMAN.H11MO.0.D	TWAYTAATTMRH	3.25e-12	4.22e-09	5.49e-06	1296	3131	3131	3131	1.03	752	24.02	532	16.99
262	NRF1_HUMAN.H11MO.0.A	CWSTGCGCATGCGCRDS	2.71e-11	6.1e-09	7.94e-06	225	3131	3131	3131	9.31	69	2.2	12	0.38
263	MAFG_HUMAN.H11MO.1.A	TGCTGAGT	2.28e-12	6.74e-09	8.77e-06	2956	3131	3131	3131	1.18	1416	45.23	1146	36.6
264	TAL1_HUMAN.H11MO.1.A	VARSAARCAGVTGKB	2.84e-12	7.31e-09	9.51e-06	2576	3131	3131	3131	1.03	1422	45.42	1153	36.83
265	MAF_HUMAN.H11MO.0.A	VAAWBTGCTGASTHWGCMD	4.42e-12	8.43e-09	1.1e-05	1906	3131	3131	3131	1.9	698	22.29	486	15.52
266	HNF1B_HUMAN.H11MO.1.A	DGTTAATVATT	1.41e-11	9.98e-09	1.3e-05	707	3131	3131	3131	1.03	437	13.96	270	8.62
267	ZN263_HUMAN.H11MO.1.A	SRGGGAGGASG	7.67e-12	1.14e-08	1.49e-05	1488	3131	3131	3131	13.1	315	10.06	172	5.49
268	GSX1_HUMAN.H11MO.0.D	TAATTAGNDDTTAAT	6.88e-12	1.19e-08	1.54e-05	1725	3131	3131	3131	1.11	939	29.99	703	22.45
269	HESX1_HUMAN.H11MO.0.D	ABSYGGCWMRTRRMMT	1.08e-11	1.21e-08	1.57e-05	1121	3131	3131	3131	1.05	650	20.76	448	14.31
270	PEBB_HUMAN.H11MO.0.C	TYTGTGGTYWB	7.46e-12	1.44e-08	1.87e-05	1928	3131	3131	3131	21.2	80	2.56	16	0.51
271	PO3F4_HUMAN.H11MO.0.D	TMATTTGCATAATTWAW	3.05e-11	1.69e-08	2.19e-05	552	3131	3131	3131	1.12	345	11.02	199	6.36
272	PO2F1_HUMAN.H11MO.0.C	AWKBRWATGSAAWYAW	2.39e-11	3.61e-08	4.7e-05	1511	3131	3131	3131	1.05	863	27.56	640	20.44
273	MYOG_HUMAN.H11MO.0.B	CHSCAGCTGYYYB	3.68e-11	4.45e-08	5.8e-05	1211	3131	3131	3131	3.32	466	14.88	297	9.49
274	HXC13_HUMAN.H11MO.0.D	DDTTTTACKAG	3.77e-11	4.6e-08	5.99e-05	1221	3131	3131	3131	1.32	600	19.16	410	13.09
275	BARX1_HUMAN.H11MO.0.D	BWAATKGTTTYY	3.85e-11	8.28e-08	0.000108	2151	3131	3131	3131	1.12	1123	35.87	882	28.17
276	PIT1_HUMAN.H11MO.0.C	YTMATGAATATWY	7.62e-11	1.22e-07	0.000159	1600	3131	3131	3131	1.19	838	26.76	623	19.9
277	VENTX_HUMAN.H11MO.0.D	YVYTAATYGSTTHHHWWTT	1.56e-10	1.43e-07	0.000186	914	3131	3131	3131	1.31	473	15.11	308	9.84
278	HSF1_HUMAN.H11MO.0.A	BRGAANSTTCYRGAA	2.25e-10	1.58e-07	0.000206	704	3131	3131	3131	4.43	198	6.32	94	3
279	FOXA3_HUMAN.H11MO.0.B	CHTGTTTACWTWG	1.35e-10	1.63e-07	0.000212	1210	3131	3131	3131	1.19	647	20.66	456	14.56
280	FOXD1_HUMAN.H11MO.0.D	CWWTGTTTACHTWVR	1.94e-10	1.73e-07	0.000226	893	3131	3131	3131	1.2	484	15.46	318	10.16
281	BPTF_HUMAN.H11MO.0.D	KKTBTTGTKKKS	6.58e-11	1.83e-07	0.000238	2773	3131	3131	3131	8.84	293	9.36	161	5.14
282	TYY1_HUMAN.H11MO.0.A	CAARATGGCGGC	4.92e-10	1.9e-07	0.000247	386	3131	3131	3131	111	35	1.12	1	0.03
283	ZN335_HUMAN.H11MO.1.A	YGCCTGW	8.41e-11	1.91e-07	0.000249	2269	3131	3131	3131	1.82	864	27.6	647	20.66
284	REL_HUMAN.H11MO.0.B	DRWRGGGRAATKCCA	8.81e-11	1.92e-07	0.000249	2175	3131	3131	3131	1.1	1166	37.24	927	29.61
285	RARA_HUMAN.H11MO.0.A	GGRRGRTSMRRAGKTCAAGG	2.25e-10	3.64e-07	0.000474	1618	3131	3131	3131	13.5	198	6.32	94	3
286	STAT6_HUMAN.H11MO.0.B	TTCTSWGGAAR	2.03e-10	4.17e-07	0.000543	2055	3131	3131	3131	1.02	1142	36.47	909	29.03
287	HTF4_HUMAN.H11MO.0.A	DSCAGSTGKG	2.01e-10	5.7e-07	0.000742	2832	3131	3131	3131	1.03	1530	48.87	1283	40.98
288	MAFK_HUMAN.H11MO.0.A	RAWWHTGCTGASTCAGCA	1.77e-09	7.56e-07	0.000984	427	3131	3131	3131	1.34	255	8.14	141	4.5
289	NRL_HUMAN.H11MO.0.D	TGCTGACKYWR	4.24e-10	7.85e-07	0.00102	1849	3131	3131	3131	1.18	900	28.74	688	21.97
290	MSX2_HUMAN.H11MO.0.D	TAATTDK	4.81e-10	8.4e-07	0.00109	1744	3131	3131	3131	1.04	958	30.6	742	23.7
291	PO4F3_HUMAN.H11MO.0.D	TCATTAATTATKCAT	3.56e-09	9.58e-07	0.00125	269	3131	3131	3131	1.11	181	5.78	88	2.81
292	FOXO4_HUMAN.H11MO.0.C	TTGTTTAYK	9.5e-10	1.47e-06	0.00192	1553	3131	3131	3131	1.21	823	26.29	622	19.87
293	ATF2_HUMAN.H11MO.0.B	RRTGABGTCAY	1.38e-09	1.74e-06	0.00227	1260	3131	3131	3131	4.34	232	7.41	123	3.93
294	MYOD1_HUMAN.H11MO.1.A	CHGCAGCTGTY	1.47e-09	1.91e-06	0.00248	1299	3131	3131	3131	2.79	496	15.84	336	10.73
295	KLF13_HUMAN.H11MO.0.D	DRGKGGGCGKD	2.83e-09	1.97e-06	0.00257	698	3131	3131	3131	2.61	367	11.72	231	7.38
296	CTCF_HUMAN.H11MO.0.A	YGGCCACCAGRKGGCRSYV	3.46e-09	2e-06	0.00261	578	3131	3131	3131	51.8	62	1.98	13	0.42
297	ZNF76_HUMAN.H11MO.0.C	RRKGCMTKCTGGGARWTGTAGT	4.03e-09	2.88e-06	0.00375	715	3131	3131	3131	1.27	426	13.61	281	8.97
298	HES7_HUMAN.H11MO.0.D	TGGCACGTGCCG	3.72e-08	3.05e-06	0.00397	82	3131	3131	3131	1.12	65	2.08	17	0.54
299	THB_HUMAN.H11MO.0.C	GRSSYSASVTSAGGTCA	3.09e-09	3.53e-06	0.00459	1141	3131	3131	3131	15.1	135	4.31	56	1.79
300	OLIG2_HUMAN.H11MO.0.B	CCAKCTGYTYYYYWBCHB	2.2e-09	5.47e-06	0.00713	2484	3131	3131	3131	10.7	221	7.06	116	3.7
301	FOXO6_HUMAN.H11MO.0.D	WWSWTGTTTACRT	8.46e-09	5.8e-06	0.00755	686	3131	3131	3131	1.03	413	13.19	273	8.72
302	TBX3_HUMAN.H11MO.0.C	DRAGGTGBSAR	1.9e-09	6.75e-06	0.00879	3546	3131	3131	3131	1.23	1657	52.92	1423	45.45
303	TBP_HUMAN.H11MO.0.A	MTATAAAARS	5.02e-09	7.25e-06	0.00944	1446	3131	3131	3131	1.2	697	22.26	517	16.51
304	NR2E3_HUMAN.H11MO.0.C	AAAGTCAAAAGTCA	5.66e-09	7.52e-06	0.00979	1329	3131	3131	3131	1.08	752	24.02	567	18.11
305	THAP1_HUMAN.H11MO.0.C	SGCCGCCATSTYGGSYBCGGGC	4.75e-09	7.57e-06	0.00985	1594	3131	3131	3131	1.45	817	26.09	625	19.96
306	ZSC31_HUMAN.H11MO.0.C	RGCAGCAGGGCARTTAKR	6.13e-09	8.14e-06	0.0106	1329	3131	3131	3131	1.14	746	23.83	562	17.95
307	SMAD4_HUMAN.H11MO.0.B	CWGTCTGDCACCT	4.73e-09	8.59e-06	0.0112	1817	3131	3131	3131	1.05	997	31.84	791	25.26
308	MYOD1_HUMAN.H11MO.0.A	VCAGCTGYYBCYGBC	8.62e-09	1.03e-05	0.0134	1191	3131	3131	3131	3.34	432	13.8	289	9.23
309	ASCL2_HUMAN.H11MO.0.D	VCASCTGCT	7.67e-09	1.13e-05	0.0148	1479	3131	3131	3131	7.14	370	11.82	237	7.57
310	SIX2_HUMAN.H11MO.0.A	KGAAAYHTGAKMC	7.62e-09	1.15e-05	0.015	1515	3131	3131	3131	1.06	835	26.67	644	20.57
311	ATOH1_HUMAN.H11MO.0.B	RRCAGMTGG	8.67e-09	1.42e-05	0.0185	1644	3131	3131	3131	1.06	906	28.94	710	22.68
312	JDP2_HUMAN.H11MO.0.D	BGATGACGTCAY	1.68e-07	2.37e-05	0.0308	141	3131	3131	3131	1.54	84	2.68	30	0.96
313	IRF9_HUMAN.H11MO.0.C	GAAAGCGAAAYT	6.82e-08	2.62e-05	0.0341	384	3131	3131	3131	1.49	185	5.91	98	3.13
314	UBIP1_HUMAN.H11MO.0.D	SCAGARA	9.75e-09	2.69e-05	0.0351	2763	3131	3131	3131	1.48	1254	40.05	1039	33.18
315	ASCL1_HUMAN.H11MO.0.A	CHVCASCTGCYBYY	1.71e-08	2.75e-05	0.0357	1601	3131	3131	3131	1.04	892	28.49	701	22.39
316	TFE2_HUMAN.H11MO.0.A	SMCAGCTGCWB	1.67e-08	2.83e-05	0.0369	1691	3131	3131	3131	1.11	917	29.29	724	23.12
317	FEZF1_HUMAN.H11MO.0.C	DYTGYYCTTTTH	1.09e-08	3e-05	0.0391	2747	3131	3131	3131	1.11	1404	44.84	1185	37.85
318	ZN418_HUMAN.H11MO.0.C	TGCTTYTRGCYTCTKVY	2.24e-08	3.66e-05	0.0476	1635	3131	3131	3131	1.06	913	29.16	722	23.06
319	HXD10_HUMAN.H11MO.0.D	TGCTTTAATT	2.06e-08	3.7e-05	0.0482	1793	3131	3131	3131	1.94	661	21.11	492	15.71
320	HXB3_HUMAN.H11MO.0.D	YTAATTASYTTTTW	3.87e-08	4.93e-05	0.0642	1273	3131	3131	3131	1.88	460	14.69	319	10.19
321	FOXQ1_HUMAN.H11MO.0.C	HATTGTTTATTT	1.92e-07	5.2e-05	0.0676	271	3131	3131	3131	1.09	172	5.49	91	2.91
322	ATF1_HUMAN.H11MO.0.B	HRRTGACGYMA	6.03e-08	5.41e-05	0.0705	898	3131	3131	3131	1.04	511	16.32	365	11.66
323	HXC11_HUMAN.H11MO.0.D	DTTTWAYGACY	7.15e-08	6.79e-05	0.0884	949	3131	3131	3131	1.05	533	17.02	385	12.3
324	RARG_HUMAN.H11MO.0.B	RGGTCASVRTGVCMTGRV	3.91e-08	7.61e-05	0.0991	1945	3131	3131	3131	1.16	993	31.72	800	25.55
325	HSF4_HUMAN.H11MO.0.D	TRGAABVTTCTAGAA	3.85e-07	8.04e-05	0.105	209	3131	3131	3131	83.7	25	0.8	1	0.03
326	ZN335_HUMAN.H11MO.0.A	RGCTGYCYNBVSCKMTGCCTGW	1.23e-07	0.000117	0.153	958	3131	3131	3131	3.25	304	9.71	193	6.16
327	NR4A1_HUMAN.H11MO.0.A	AAAGGKCAV	3.46e-08	0.000121	0.158	3505	3131	3131	3131	1.08	1756	56.08	1542	49.25
328	THA_HUMAN.H11MO.0.C	RGGTCABYTSAGGTCAK	6.17e-08	0.00014	0.182	2267	3131	3131	3131	30.8	46	1.47	8	0.26
329	THB_HUMAN.H11MO.1.D	SGTSAGGTCA	8.63e-08	0.000144	0.187	1664	3131	3131	3131	3.37	396	12.65	268	8.56
330	ZN768_HUMAN.H11MO.0.C	GAGGCHCAGAGAGGTTAAGT	3.81e-07	0.000151	0.197	397	3131	3131	3131	5.82	134	4.28	65	2.08
331	HXA1_HUMAN.H11MO.0.C	TKGATGGATG	2.3e-07	0.000155	0.201	673	3131	3131	3131	816	22	0.7	0	0
332	ZN219_HUMAN.H11MO.0.D	GDGGGGGGYGGA	8.41e-08	0.000162	0.211	1923	3131	3131	3131	1.59	885	28.27	704	22.48
333	TYY2_HUMAN.H11MO.0.D	AWAATGGCGGH	4.61e-07	0.000179	0.233	389	3131	3131	3131	45.7	21	0.67	0	0
334	RFX1_HUMAN.H11MO.0.B	SSSSCBGTTGCCAKGGVRACSS	3.37e-07	0.000194	0.253	577	3131	3131	3131	36.3	49	1.56	11	0.35
335	CDX1_HUMAN.H11MO.0.C	HTTTATGD	9.34e-08	0.00022	0.287	2362	3131	3131	3131	2.23	481	15.36	341	10.89
336	TF65_HUMAN.H11MO.0.A	HWGGGRATTTCCMV	2.15e-07	0.000223	0.29	1037	3131	3131	3131	1.98	415	13.25	288	9.2
337	NR1H3_HUMAN.H11MO.1.B	MVAGGTCAVR	8.03e-08	0.000237	0.309	2956	3131	3131	3131	6.05	233	7.44	135	4.31
338	PO6F1_HUMAN.H11MO.0.D	CATAAWTTATGCR	2.11e-06	0.000243	0.316	115	3131	3131	3131	1.34	76	2.43	29	0.93
339	E4F1_HUMAN.H11MO.0.D	YGTKACGTC	9.37e-07	0.000255	0.332	272	3131	3131	3131	3	104	3.32	46	1.47
340	THA_HUMAN.H11MO.1.D	BTSAGGTCAS	1.38e-07	0.000268	0.349	1935	3131	3131	3131	2.45	543	17.34	397	12.68
341	ZEP2_HUMAN.H11MO.0.D	GGYDGGGWAACCSS	2.63e-07	0.000423	0.551	1609	3131	3131	3131	1.12	818	26.13	649	20.73
342	MAFA_HUMAN.H11MO.0.D	STGCTGACBMYGCAGYHTYCV	3.02e-07	0.000451	0.587	1490	3131	3131	3131	2.18	493	15.75	357	11.4
343	CDC5L_HUMAN.H11MO.0.D	GBGWKTTAAYRTAWY	7.29e-07	0.000528	0.688	725	3131	3131	3131	1.49	338	10.8	228	7.28
344	BSH_HUMAN.H11MO.0.D	TAATKVGTTAATBR	4.87e-07	0.000551	0.717	1132	3131	3131	3131	3.7	208	6.64	121	3.86
345	EVX2_HUMAN.H11MO.0.A	KTTTTATKRCYBY	7.05e-07	0.000676	0.88	958	3131	3131	3131	1.2	503	16.07	370	11.82
346	ZBT7B_HUMAN.H11MO.0.D	SSCSGTTGCCATGGVRACSGS	2.28e-06	0.000725	0.944	318	3131	3131	3131	52.4	35	1.12	6	0.19
347	MYF6_HUMAN.H11MO.0.C	CASCTGC	4.31e-07	0.000787	1.02	1825	3131	3131	3131	3.29	709	22.64	552	17.63
348	ZBT14_HUMAN.H11MO.0.C	GGAGCGCGC	1.59e-06	0.000884	1.15	555	3131	3131	3131	2.02	231	7.38	143	4.57
349	HIC2_HUMAN.H11MO.0.D	HCRTGCCAGVN	6.19e-07	0.000924	1.2	1493	3131	3131	3131	2.51	558	17.82	418	13.35
350	VSX1_HUMAN.H11MO.0.D	TAATTAGCHWWWWW	1.22e-06	0.000942	1.23	770	3131	3131	3131	1.06	437	13.96	315	10.06
351	NANOG_HUMAN.H11MO.0.A	BYYWTTGWNATGCAAAT	5.87e-07	0.00095	1.24	1619	3131	3131	3131	1.07	890	28.43	721	23.03
352	HXD8_HUMAN.H11MO.0.D	WAATWTGCAYN	4.81e-07	0.000963	1.25	2002	3131	3131	3131	1.15	982	31.36	806	25.74
353	ATF2_HUMAN.H11MO.2.C	RRTGACGTCAS	1.91e-05	0.00109	1.41	57	3131	3131	3131	1.22	37	1.18	9	0.29
354	AHR_HUMAN.H11MO.0.B	DTYGCGTGM	1.4e-06	0.00115	1.5	822	3131	3131	3131	1.04	466	14.88	341	10.89
355	HSF2_HUMAN.H11MO.0.A	VGAABRTTCTAGAA	9.53e-07	0.00127	1.65	1332	3131	3131	3131	10.2	58	1.85	17	0.54
356	ZEB1_HUMAN.H11MO.0.A	BVCAGGTGWG	5.43e-07	0.00132	1.72	2435	3131	3131	3131	1.01	1312	41.9	1123	35.87
357	HXA9_HUMAN.H11MO.0.B	RTGATTTATKR	1.15e-06	0.00145	1.89	1258	3131	3131	3131	11.2	96	3.07	41	1.31
358	MSX1_HUMAN.H11MO.0.D	TAATTGSWWKTTAATTGS	3.93e-06	0.00168	2.19	428	3131	3131	3131	1.85	192	6.13	115	3.67
359	IRF5_HUMAN.H11MO.0.D	KAAAGGRAARCMAAAWSWGA	1.41e-05	0.00169	2.2	120	3131	3131	3131	1.59	77	2.46	33	1.05
360	ATF2_HUMAN.H11MO.1.B	WDDWGATGATGTCATCWWTW	2.03e-05	0.0017	2.22	84	3131	3131	3131	2.61	51	1.63	17	0.54
361	ATF7_HUMAN.H11MO.0.D	KRTGACGTCAT	2.67e-05	0.00192	2.5	72	3131	3131	3131	1.83	40	1.28	11	0.35
362	LHX9_HUMAN.H11MO.0.D	YTAATTAGYNHWWWWWWD	3.84e-06	0.002	2.61	522	3131	3131	3131	4.73	152	4.85	84	2.68
363	ZNF85_HUMAN.H11MO.1.C	TGMWGKAATCTYY	1.88e-06	0.002	2.61	1069	3131	3131	3131	1.38	504	16.1	376	12.01
364	ZNF41_HUMAN.H11MO.1.C	CACAAGGRARWV	1.05e-06	0.00225	2.93	2143	3131	3131	3131	1.07	1136	36.28	958	30.6
365	COT2_HUMAN.H11MO.0.A	CARAGGTCARRGD	1.12e-06	0.00236	3.07	2101	3131	3131	3131	1.62	850	27.15	688	21.97
366	TWST1_HUMAN.H11MO.1.A	VMCATCTGGW	1.36e-06	0.00267	3.48	1973	3131	3131	3131	1.03	1065	34.01	892	28.49
367	GBX2_HUMAN.H11MO.0.D	BTAATTRSYBHHWWWWW	3.09e-06	0.00274	3.56	888	3131	3131	3131	2.04	326	10.41	224	7.15
368	ZN563_HUMAN.H11MO.0.C	RGGNTCMTNDCHGGCAGCTGY	1.31e-06	0.00276	3.6	2115	3131	3131	3131	5.77	248	7.92	156	4.98
369	RORA_HUMAN.H11MO.0.C	AWSTRGGTCARRG	9.83e-07	0.00291	3.79	2966	3131	3131	3131	2.41	757	24.18	601	19.2
370	EVX1_HUMAN.H11MO.0.D	TGATTTATKGCYW	2.23e-06	0.00298	3.88	1338	3131	3131	3131	9.91	100	3.19	45	1.44
371	ZN143_HUMAN.H11MO.0.A	DGCMTKCTGGGARWTGTAGTYY	1.07e-05	0.003	3.91	282	3131	3131	3131	1.93	139	4.44	77	2.46
372	CREB5_HUMAN.H11MO.0.D	RRTGACGTMAT	3.33e-05	0.00302	3.94	91	3131	3131	3131	9.33	30	0.96	6	0.19
373	SOX2_HUMAN.H11MO.1.A	BCCWTTGTYATGYWRA	2.77e-06	0.00573	7.47	2073	3131	3131	3131	2.75	561	17.92	429	13.7
374	ZNF85_HUMAN.H11MO.0.C	AWAGAARWCTGMWGKAATCT	7.79e-06	0.00574	7.48	740	3131	3131	3131	1.18	424	13.54	313	10
375	IRX3_HUMAN.H11MO.0.D	WNWCATGTWMT	3.22e-06	0.00577	7.52	1796	3131	3131	3131	1.52	678	21.65	536	17.12
376	NR0B1_HUMAN.H11MO.0.D	GMGKGGGASR	2.72e-06	0.00598	7.78	2204	3131	3131	3131	8.61	129	4.12	66	2.11
377	MEOX1_HUMAN.H11MO.0.D	GGTAATTAGBGKHAWW	1.63e-05	0.00626	8.15	386	3131	3131	3131	1.74	176	5.62	107	3.42
378	HLTF_HUMAN.H11MO.0.D	KANKGCTGSMAM	2.93e-06	0.00677	8.81	2321	3131	3131	3131	1.15	1155	36.89	984	31.43
379	PAX2_HUMAN.H11MO.0.D	RHTCAGTSAYGMGTGAYW	7.33e-06	0.00696	9.06	953	3131	3131	3131	5.42	95	3.03	44	1.41
380	SMAD1_HUMAN.H11MO.0.D	RSCCTGTCTGCC	3.51e-06	0.00705	9.17	2016	3131	3131	3131	1.14	1024	32.71	860	27.47
381	BHE23_HUMAN.H11MO.0.D	RRSRTRTGKTDB	2.71e-06	0.00735	9.57	2723	3131	3131	3131	1.28	1068	34.11	900	28.74
382	NDF2_HUMAN.H11MO.0.B	RRCAGATGG	3.89e-06	0.00736	9.58	1899	3131	3131	3131	1.47	858	27.4	704	22.48
# AME (Analysis of Motif Enrichment): Version 5.0.5 compiled on Jul 15 2019 at 00:31:14
# The format of this file is described at http://meme-suite.org//doc/ame-output-format.html.
# ame --verbose 1 --oc . --scoring avg --method fisher --hit-lo-fraction 0.25 --evalue-report-threshold 10.0 --control --shuffle-- --kmer 2 YT_chip_seq.fasta db/HUMAN/HOCOMOCOv11_full_HUMAN_mono_meme_format.meme db/MOUSE/HOCOMOCOv11_full_MOUSE_mono_meme_format.meme

## Sheet: TFE3.ChIP.AME.Enrichment
rank	motif_ID	consensus	p-value	adj_p-value	E-value	tests	FASTA_max	pos	neg	PWM_min	TP	%TP	FP	%FP
1	MITF_HUMAN.H11MO.0.A	TCACGTGACC	8.05e-137	1.96e-134	2.55e-131	243	279	279	1116	27.8	167	59.86	2	0.18
2	USF1_HUMAN.H11MO.0.A	RGTCACGTGRBS	8.63e-136	1.88e-133	2.45e-130	218	279	279	1116	30.4	166	59.5	2	0.18
3	USF2_HUMAN.H11MO.0.A	GGGTCACGTGRBSVSSSSB	1.51e-134	3.44e-132	4.48e-129	228	279	279	1116	14.3	168	60.22	4	0.36
4	TFE3_HUMAN.H11MO.0.B	RGTCACGTGA	1.48e-132	3.64e-130	4.73e-127	246	279	279	1116	29.7	161	57.71	1	0.09
5	TFEB_HUMAN.H11MO.0.C	RGTCACGTG	3.33e-124	6.13e-122	7.99e-119	184	279	279	1116	2.77	168	60.22	12	1.08
6	MLX_HUMAN.H11MO.0.D	YGATCACGTGN	5.42e-119	1.19e-116	1.55e-113	219	279	279	1116	8.19	166	59.5	15	1.34
7	BHE40_HUMAN.H11MO.0.A	DGCACGTGAS	1.48e-116	4.24e-114	5.52e-111	286	279	279	1116	10.6	158	56.63	10	0.9
8	ATF3_HUMAN.H11MO.0.A	GGTSACGTGAB	3.29e-110	1.16e-107	1.51e-104	354	279	279	1116	11.1	157	56.27	15	1.34
9	CR3L2_HUMAN.H11MO.0.D	TGATGACGTGGCA	3.12e-82	6.62e-80	8.61e-77	212	279	279	1116	1.59	149	53.41	42	3.76
10	CLOCK_HUMAN.H11MO.0.C	CWGHCACGTGMVVM	1.88e-62	9.1e-60	1.18e-56	484	279	279	1116	1.76	164	58.78	114	10.22
11	BMAL1_HUMAN.H11MO.0.A	KSCACGTGHSY	3.53e-58	9.4e-56	1.22e-52	266	279	279	1116	1.04	156	55.91	109	9.77
12	SRBP1_HUMAN.H11MO.0.A	DGTSRGGTGAB	7.19e-58	4.24e-55	5.52e-52	590	279	279	1116	2.71	176	63.08	158	14.16
13	HEY1_HUMAN.H11MO.0.D	KGRCACGTGBCK	5.74e-56	1.14e-53	1.48e-50	198	279	279	1116	1.07	130	46.59	64	5.73
14	MYCN_HUMAN.H11MO.0.A	RGCCACGTGSDS	2.12e-48	6.52e-46	8.49e-43	308	279	279	1116	1.03	159	56.99	149	13.35
15	ATF6A_HUMAN.H11MO.0.B	GKGSTGACGTGG	2.72e-39	3.62e-37	4.72e-34	133	279	279	1116	1.04	92	32.97	41	3.67
16	BHE41_HUMAN.H11MO.0.D	WSVRKSYCACGTGMWGRRRV	5.54e-33	1.06e-30	1.38e-27	192	279	279	1116	2.41	89	31.9	52	4.66
17	SP1_HUMAN.H11MO.1.A	VGGGGGCGGGGCCK	8.8e-33	4.44e-30	5.78e-27	505	279	279	1116	5.73	107	38.35	87	7.8
18	SP2_HUMAN.H11MO.0.A	GGSSVGGGGGCGGGGCCDGSGS	1.72e-31	1.17e-28	1.52e-25	681	279	279	1116	27.7	86	30.82	51	4.57
19	MAX_HUMAN.H11MO.0.A	VRGCACGTGG	7.16e-31	2.24e-28	2.92e-25	313	279	279	1116	1.03	138	49.46	170	15.23
20	SP4_HUMAN.H11MO.0.A	SRGVARGRGGCGGRGCHDRR	1.08e-30	6.95e-28	9.05e-25	646	279	279	1116	5.77	121	43.37	127	11.38
21	SP2_HUMAN.H11MO.1.B	RGGRGGCGGGGC	3.83e-30	1.99e-27	2.59e-24	518	279	279	1116	10.1	92	32.97	66	5.91
22	KLF12_HUMAN.H11MO.0.C	VGGGGCGGGGC	8.34e-30	3.18e-27	4.14e-24	381	279	279	1116	6.17	94	33.69	71	6.36
23	SP1_HUMAN.H11MO.0.A	VGGGGGCGGGGCCKGGGGGGGG	9.94e-29	2.91e-26	3.79e-23	293	279	279	1116	9.44	88	31.54	63	5.65
24	SP3_HUMAN.H11MO.0.B	SGVVGGGGGCGGGGCBRGSS	1.63e-28	1.25e-25	1.63e-22	766	279	279	1116	16.4	100	35.84	88	7.89
25	KLF3_HUMAN.H11MO.0.B	GGRGVDGGGCGGGGCYGGG	9.55e-28	5.61e-25	7.3e-22	587	279	279	1116	9.3	100	35.84	91	8.15
26	XBP1_HUMAN.H11MO.0.D	GSKGACGTGGC	3.18e-27	1.29e-24	1.68e-21	407	279	279	1116	1.03	157	56.27	247	22.13
27	SP4_HUMAN.H11MO.1.A	GRRRGGGGMGGGGCBK	9.23e-27	4.83e-24	6.28e-21	523	279	279	1116	10.7	94	33.69	82	7.35
28	MXI1_HUMAN.H11MO.0.A	VCACGTGGSNGSBGS	1.75e-26	6.21e-24	8.08e-21	354	279	279	1116	1.65	109	39.07	117	10.48
29	ARNT_HUMAN.H11MO.0.B	STACGTGMC	1.77e-25	5.15e-23	6.71e-20	291	279	279	1116	1.02	125	44.8	163	14.61
30	MXI1_HUMAN.H11MO.1.A	SCCACGTGSYB	2.23e-25	7.77e-23	1.01e-19	349	279	279	1116	1.12	132	47.31	183	16.4
31	TAF1_HUMAN.H11MO.0.A	RARRWGGCGGMGGMGR	2.73e-23	1.39e-20	1.81e-17	510	279	279	1116	1.97	128	45.88	184	16.49
32	ELF2_HUMAN.H11MO.0.C	RAVCCGGAAGTGR	7.18e-23	1.95e-20	2.54e-17	272	279	279	1116	2.57	81	29.03	70	6.27
33	E2F7_HUMAN.H11MO.0.B	GDGGCGGGAARDR	1.86e-22	1.13e-19	1.47e-16	605	279	279	1116	2.77	118	42.29	161	14.43
34	MAZ_HUMAN.H11MO.1.A	RRGGGAGGGGS	5.84e-22	3.29e-19	4.28e-16	563	279	279	1116	13.3	84	30.11	80	7.17
35	CREB3_HUMAN.H11MO.0.D	KGRTGACGTGGCA	7.25e-20	4.35e-18	5.66e-15	60	279	279	1116	1.06	44	15.77	16	1.43
36	GABPA_HUMAN.H11MO.0.A	GVVRCCGGAAGTGV	4.63e-20	1.01e-17	1.32e-14	219	279	279	1116	1.33	89	31.9	100	8.96
37	KLF9_HUMAN.H11MO.0.C	GRRGKGGGCGTGGCC	1.09e-19	3.41e-17	4.44e-14	312	279	279	1116	2.78	94	33.69	114	10.22
38	E2F4_HUMAN.H11MO.0.A	SRGGGCGGGAARD	1.18e-19	6.04e-17	7.86e-14	512	279	279	1116	2.45	114	40.86	167	14.96
39	WT1_HUMAN.H11MO.0.C	RGGVGGGGGAGGRGGVGGRG	4.12e-19	2.13e-16	2.77e-13	516	279	279	1116	5.9	104	37.28	143	12.81
40	ELK4_HUMAN.H11MO.0.A	SVCCGGAAGTGV	1.1e-18	2.13e-16	2.77e-13	194	279	279	1116	4.11	51	18.28	29	2.6
41	KLF1_HUMAN.H11MO.0.A	DGGGYGKGGCYGGG	5.72e-19	3.04e-16	3.96e-13	532	279	279	1116	15.7	64	22.94	51	4.57
42	TYY1_HUMAN.H11MO.0.A	CAARATGGCGGC	5.66e-18	4.47e-16	5.82e-13	79	279	279	1116	64.1	26	9.32	1	0.09
43	ETV1_HUMAN.H11MO.0.A	SRCCGGAAGYG	2.95e-18	8.19e-16	1.07e-12	278	279	279	1116	4.01	60	21.51	46	4.12
44	ELF1_HUMAN.H11MO.0.A	VRACCCGGAAGTGS	1.23e-17	2.91e-15	3.79e-12	237	279	279	1116	4.39	55	19.71	39	3.49
45	ELK1_HUMAN.H11MO.0.B	RCCGGAAGTGV	6.54e-17	1.12e-14	1.46e-11	172	279	279	1116	1.82	61	21.86	53	4.75
46	KLF6_HUMAN.H11MO.0.A	GSRRGGGHGGGGMHGGGRV	2.54e-16	1.92e-13	2.51e-10	759	279	279	1116	5.52	114	40.86	190	17.03
47	FLI1_HUMAN.H11MO.1.A	RRRCAGGAAGBRG	4.66e-15	1.58e-12	2.06e-09	339	279	279	1116	3.92	73	26.16	88	7.89
48	TYY2_HUMAN.H11MO.0.D	AWAATGGCGGH	2.04e-14	2.3e-12	3e-09	113	279	279	1116	19.7	21	7.53	1	0.09
49	TFDP1_HUMAN.H11MO.0.C	RRRRGGCGGGAARN	1.26e-14	6.38e-12	8.31e-09	506	279	279	1116	1.59	126	45.16	241	21.59
50	NRF1_HUMAN.H11MO.0.A	CWSTGCGCATGCGCRDS	7.12e-14	6.41e-12	8.34e-09	90	279	279	1116	17.5	26	9.32	6	0.54
51	ESR2_HUMAN.H11MO.1.A	AGGTCAS	2.84e-14	1.07e-11	1.39e-08	376	279	279	1116	1.43	106	37.99	182	16.31
52	ETS1_HUMAN.H11MO.0.A	RRRCMGGAAGTGG	5.55e-14	1.58e-11	2.06e-08	285	279	279	1116	5.11	50	17.92	43	3.85
53	KLF4_HUMAN.H11MO.0.A	WGGGYGKGGC	5.7e-14	2.51e-11	3.27e-08	441	279	279	1116	1.32	130	46.59	260	23.3
54	EPAS1_HUMAN.H11MO.0.B	VTACGTGMC	1.38e-13	3.04e-11	3.96e-08	220	279	279	1116	1.01	87	31.18	133	11.92
55	FLI1_HUMAN.H11MO.0.A	SRRGGMAGGAAGGRRRGR	9.83e-14	3.55e-11	4.62e-08	361	279	279	1116	9.23	52	18.64	48	4.3
56	HESX1_HUMAN.H11MO.0.D	ABSYGGCWMRTRRMMT	2.06e-13	4.14e-11	5.39e-08	201	279	279	1116	1.31	72	25.81	95	8.51
57	KLF15_HUMAN.H11MO.0.A	RGGGMGGRGVDGGGGGRGG	1.09e-13	5.57e-11	7.25e-08	512	279	279	1116	8.09	88	31.54	135	12.1
58	MYC_HUMAN.H11MO.0.A	RCCACGTGCTB	3.84e-13	7.37e-11	9.59e-08	192	279	279	1116	1.03	78	27.96	112	10.04
59	PATZ1_HUMAN.H11MO.0.C	GGGGMGGGGGMKGGRRVGGVRG	1.08e-13	7.8e-11	1.02e-07	725	279	279	1116	15.6	79	28.32	111	9.95
60	ERG_HUMAN.H11MO.0.A	RRRSAGGAAGYGG	2.3e-13	7.93e-11	1.03e-07	344	279	279	1116	4.78	64	22.94	76	6.81
61	EGR2_HUMAN.H11MO.0.A	GRGRRKGWGKGGGHGGRG	1.77e-13	1.16e-10	1.51e-07	653	279	279	1116	3.55	131	46.95	268	24.01
62	HES1_HUMAN.H11MO.0.D	VMGVCACGMGMCM	3.78e-13	1.6e-10	2.09e-07	424	279	279	1116	1.27	120	43.01	235	21.06
63	ELF5_HUMAN.H11MO.0.A	VGRASSAGGAAGTRV	6.19e-13	1.72e-10	2.24e-07	278	279	279	1116	1.05	100	35.84	175	15.68
64	ZN467_HUMAN.H11MO.0.C	GGGGAGGGGRRGGRGRRGGRRR	6.68e-13	2.78e-10	3.62e-07	416	279	279	1116	6.04	92	32.97	152	13.62
65	FEV_HUMAN.H11MO.0.B	GCVGGAAGYG	9.64e-13	7.1e-10	9.25e-07	737	279	279	1116	2.3	80	28.67	120	10.75
66	ESR1_HUMAN.H11MO.1.A	CHRGGTCASV	3.05e-12	9.9e-10	1.29e-06	325	279	279	1116	1.81	82	29.39	129	11.56
67	KLF5_HUMAN.H11MO.0.A	WGGGTGKGGCDGGG	2.3e-12	1.38e-09	1.8e-06	600	279	279	1116	1.68	147	52.69	335	30.02
68	RXRB_HUMAN.H11MO.0.C	TSAGGTCASR	4.77e-12	1.46e-09	1.91e-06	307	279	279	1116	1.36	90	32.26	153	13.71
69	MAZ_HUMAN.H11MO.0.A	GGGGGAGGGGGDGRGRRRGRRG	3.5e-12	2.26e-09	2.94e-06	645	279	279	1116	2.31	147	52.69	337	30.2
70	ZBT17_HUMAN.H11MO.0.A	SRRGGWGGGGGAGGGGMRR	1.92e-11	1.37e-08	1.79e-05	714	279	279	1116	4.63	114	40.86	232	20.79
71	ETV2_HUMAN.H11MO.0.B	RRARRCAGGAARYRGS	8.12e-11	1.54e-08	2.01e-05	190	279	279	1116	1.18	70	25.09	107	9.59
72	ZFP42_HUMAN.H11MO.0.A	GGCMGCCATTTT	8.3e-11	1.6e-08	2.08e-05	193	279	279	1116	17.7	22	7.89	7	0.63
73	EHF_HUMAN.H11MO.0.B	VWACSAGGAAGTDVS	1.1e-10	1.7e-08	2.22e-05	155	279	279	1116	3.2	42	15.05	41	3.67
74	KLF14_HUMAN.H11MO.0.D	DRGKGGGCGTGGY	7.55e-11	2.05e-08	2.67e-05	272	279	279	1116	4.35	52	18.64	62	5.56
75	VEZF1_HUMAN.H11MO.1.C	RRRRGGAGGGGR	2.55e-11	2.17e-08	2.83e-05	851	279	279	1116	8.34	54	19.35	64	5.73
76	ETS2_HUMAN.H11MO.0.B	RDVRGGAARVRRR	4.78e-11	2.97e-08	3.87e-05	622	279	279	1116	2.7	104	37.28	204	18.28
77	ZN341_HUMAN.H11MO.0.C	GRGGRRRRGGRGRRGGAASAGC	1.14e-10	6.6e-08	8.6e-05	579	279	279	1116	13.9	52	18.64	63	5.65
78	VEZF1_HUMAN.H11MO.0.C	GGRRRRGRRGGAGGGGGRGRRR	1.02e-10	7.06e-08	9.19e-05	695	279	279	1116	4.26	122	43.73	266	23.84
79	IRF3_HUMAN.H11MO.0.B	RAAARGGAAAVDGAAASDGA	3.34e-10	9.47e-08	0.000123	283	279	279	1116	3.94	63	22.58	93	8.33
80	EGR1_HUMAN.H11MO.0.A	VDRDGCGKGGGYGGRRR	1.61e-10	1.09e-07	0.000142	676	279	279	1116	2.65	124	44.44	275	24.64
81	E2F6_HUMAN.H11MO.0.A	DGGGCGGGARRVR	2.8e-10	1.54e-07	0.0002	549	279	279	1116	2.06	106	37.99	218	19.53
82	NFYC_HUMAN.H11MO.0.A	BBRRCCAATCAGMR	1.57e-09	3.78e-07	0.000492	241	279	279	1116	4.13	35	12.54	32	2.87
83	ETV5_HUMAN.H11MO.0.C	RRRSAGGAARDGRV	8.56e-10	4.9e-07	0.000638	572	279	279	1116	5.03	58	20.79	83	7.44
84	NFYA_HUMAN.H11MO.0.A	BYRRCCAATCAGAR	4.31e-09	5.77e-07	0.000752	134	279	279	1116	4.09	32	11.47	28	2.51
85	ZSC22_HUMAN.H11MO.0.C	RGKCWGAGGGMGGAGG	2.48e-09	9.07e-07	0.00118	366	279	279	1116	1.1	112	40.14	248	22.22
86	ZFX_HUMAN.H11MO.1.A	DGVRGVVSAGGCCKVGG	1.63e-09	1.16e-06	0.00152	714	279	279	1116	1.85	136	48.75	329	29.48
87	E2F1_HUMAN.H11MO.0.A	RRNKGGCGGGAARR	2.77e-09	1.27e-06	0.00165	457	279	279	1116	1.17	123	44.09	286	25.63
88	ZN770_HUMAN.H11MO.0.C	GGGAGGCYGAGGBRGGAGGATC	7.69e-09	2.27e-06	0.00295	295	279	279	1116	2.11	76	27.24	140	12.54
89	SPI1_HUMAN.H11MO.0.A	RRAAAGAGGAAGTGRVD	2.39e-08	3.32e-06	0.00433	139	279	279	1116	1.15	54	19.35	83	7.44
90	NFYB_HUMAN.H11MO.0.A	YRRCCAATSAGMR	2.8e-08	3.36e-06	0.00437	120	279	279	1116	7.53	26	9.32	20	1.79
91	E2F3_HUMAN.H11MO.0.A	DDGGCGGGAAA	8.33e-09	4.7e-06	0.00612	565	279	279	1116	1.34	127	45.52	306	27.42
92	PATZ1_HUMAN.H11MO.1.C	AGGGAGGGG	8.17e-09	6.38e-06	0.0083	780	279	279	1116	7.03	61	21.86	98	8.78
93	TBX1_HUMAN.H11MO.0.D	GGGYGGGYAGGGGTGGGMDD	1.63e-08	6.63e-06	0.00863	406	279	279	1116	1.58	110	39.43	251	22.49
94	TBX15_HUMAN.H11MO.0.D	GGGGGGGGGGGGGTGGGDR	1.45e-08	9.27e-06	0.0121	639	279	279	1116	1.1	169	60.57	467	41.85
95	ZN148_HUMAN.H11MO.0.D	KGRGKGGGGGAGGGG	1.81e-08	1.1e-05	0.0143	607	279	279	1116	15.7	70	25.09	126	11.29
96	CEBPZ_HUMAN.H11MO.0.D	DCTSATTGGCT	1.65e-07	1.12e-05	0.0146	68	279	279	1116	1.96	27	9.68	25	2.24
97	THA_HUMAN.H11MO.1.D	BTSAGGTCAS	4.09e-08	1.2e-05	0.0156	294	279	279	1116	1.41	78	27.96	153	13.71
98	KLF16_HUMAN.H11MO.0.D	GGGGGYGKGKBGGGGGGGG	2.23e-08	1.47e-05	0.0191	657	279	279	1116	4.33	120	43.01	287	25.72
99	ETV7_HUMAN.H11MO.0.D	VAGGAAR	1.02e-07	6.03e-05	0.0785	592	279	279	1116	1.03	155	55.56	425	38.08
100	ZN121_HUMAN.H11MO.0.C	CTGGGCAACABAGYRAGACC	2.36e-06	7.79e-05	0.101	33	279	279	1116	729	8	2.87	0	0
101	ZN263_HUMAN.H11MO.0.A	GGGAGGAGGRRGRGGRGGRR	3.38e-07	0.000143	0.186	422	279	279	1116	10.3	55	19.71	95	8.51
102	ELF3_HUMAN.H11MO.0.A	RAABVAGGAAGTRR	8.51e-07	0.000156	0.203	183	279	279	1116	1.49	53	19	93	8.33
103	RFX2_HUMAN.H11MO.0.A	CKGTTGCCATGGCRACVS	3.8e-06	0.000183	0.238	48	279	279	1116	65.2	9	3.23	1	0.09
104	ZBT7B_HUMAN.H11MO.0.D	SSCSGTTGCCATGGVRACSGS	2.81e-06	0.00025	0.325	89	279	279	1116	13.4	12	4.3	4	0.36
105	ZN281_HUMAN.H11MO.0.A	RGGWGGGGGAGGGGV	6.1e-07	0.000276	0.36	453	279	279	1116	31.1	39	13.98	55	4.93
106	RARA_HUMAN.H11MO.1.A	VAGGTCAGRG	9.28e-07	0.000374	0.487	403	279	279	1116	2.34	68	24.37	137	12.28
107	ETV4_HUMAN.H11MO.0.B	VRCAGGAARBR	1.59e-06	0.000748	0.974	471	279	279	1116	13.4	16	5.73	9	0.81
108	NFAT5_HUMAN.H11MO.0.D	RRRGGAARRDN	1.48e-06	0.000934	1.22	631	279	279	1116	1.37	142	50.9	394	35.3
109	HXB13_HUMAN.H11MO.0.A	TTTTATDGSH	3.8e-06	0.000943	1.23	248	279	279	1116	38.6	9	3.23	1	0.09
110	PURA_HUMAN.H11MO.0.D	GGWRKKGGDGGGCVKGG	1.34e-06	0.000945	1.23	705	279	279	1116	1.05	176	63.08	527	47.22
111	GSC2_HUMAN.H11MO.0.D	RKMGGRTTRGB	2.36e-06	0.00109	1.42	461	279	279	1116	40.3	8	2.87	0	0
112	PRDM6_HUMAN.H11MO.0.C	RRRARGAAAAAAA	3.03e-06	0.00112	1.46	371	279	279	1116	2.6	77	27.6	171	15.32
113	HES7_HUMAN.H11MO.0.D	TGGCACGTGCCG	6.71e-05	0.00114	1.48	17	279	279	1116	1.08	11	3.94	6	0.54
114	THAP1_HUMAN.H11MO.0.C	SGCCGCCATSTYGGSYBCGGGC	2.38e-06	0.00114	1.49	480	279	279	1116	2.05	90	32.26	212	19
115	FOXI1_HUMAN.H11MO.0.B	YTBTGATTGGYY	3.43e-05	0.00165	2.14	48	279	279	1116	7.02	14	5.02	10	0.9
116	HXA1_HUMAN.H11MO.0.C	TKGATGGATG	1.2e-05	0.00191	2.49	159	279	279	1116	1110	7	2.51	0	0
117	EGR2_HUMAN.H11MO.1.A	GRDGHGKGGGHGGRGG	3.05e-06	0.00195	2.54	639	279	279	1116	1.03	162	58.06	477	42.74
118	RARG_HUMAN.H11MO.1.B	VAGGTCAS	4.37e-06	0.00196	2.55	448	279	279	1116	2.9	51	18.28	94	8.42
119	THB_HUMAN.H11MO.1.D	SGTSAGGTCA	9.68e-06	0.00225	2.93	233	279	279	1116	2.06	47	16.85	86	7.71
120	BC11A_HUMAN.H11MO.0.A	RAAAGAGGAAGTGARAV	4.99e-06	0.0023	2.99	461	279	279	1116	3.24	73	26.16	161	14.43
121	WT1_HUMAN.H11MO.1.B	GWGGGAGGAGS	3.5e-06	0.00234	3.05	669	279	279	1116	17.7	22	7.89	21	1.88
122	FOS_HUMAN.H11MO.0.A	VTGAGTCAB	1.34e-05	0.0025	3.26	187	279	279	1116	4.36	27	9.68	35	3.14
123	SPIC_HUMAN.H11MO.0.D	KVDRRWGGGKDRG	3.31e-06	0.00283	3.69	856	279	279	1116	2.6	116	41.58	304	27.24
124	EGR4_HUMAN.H11MO.0.D	GGSGGYRGGGM	6.54e-06	0.00284	3.7	435	279	279	1116	1.02	118	42.29	316	28.32
125	FOSL1_HUMAN.H11MO.0.A	KRVTGAGTCAYH	4.3e-05	0.00352	4.59	82	279	279	1116	10.3	18	6.45	18	1.61
126	SPIB_HUMAN.H11MO.0.A	RRAAAGAGGAAGTGARA	3.69e-05	0.00379	4.94	103	279	279	1116	1.27	36	12.9	61	5.47
127	ATF7_HUMAN.H11MO.0.D	KRTGACGTCAT	0.00022	0.00483	6.29	22	279	279	1116	2.85	8	2.87	3	0.27
128	OSR2_HUMAN.H11MO.0.C	GBYSCWGCTNCTGYDG	1.77e-05	0.00559	7.28	316	279	279	1116	5.89	32	11.47	48	4.3
129	SPDEF_HUMAN.H11MO.0.D	RWCCMGGAWGWAGT	3.1e-05	0.0059	7.68	191	279	279	1116	1.6	48	17.2	94	8.42
130	HXA7_HUMAN.H11MO.0.D	VMTCRATMGATTGGM	2.56e-05	0.00648	8.43	254	279	279	1116	7.96	17	6.09	15	1.34
131	FOSB_HUMAN.H11MO.0.A	RTGAGTCAB	3.06e-05	0.00701	9.13	230	279	279	1116	3.15	34	12.19	55	4.93
132	IRF8_HUMAN.H11MO.0.B	RAAARRGGAASTGAAASTDR	5.47e-05	0.00703	9.15	129	279	279	1116	1.22	44	15.77	85	7.62
# AME (Analysis of Motif Enrichment): Version 5.0.5 compiled on Jul 15 2019 at 00:31:14
# The format of this file is described at http://meme-suite.org//doc/ame-output-format.html.
# ame --verbose 1 --oc . --scoring avg --method fisher --hit-lo-fraction 0.25 --evalue-report-threshold 10.0 --control --shuffle-- --kmer 2 TFE3_chip_seq.fasta db/HUMAN/HOCOMOCOv11_full_HUMAN_mono_meme_format.meme db/MOUSE/HOCOMOCOv11_full_MOUSE_mono_meme_format.meme

## Sheet: TAZ4SA.ChIP.AME.Enrichment
rank	motif_ID	consensus	p-value	adj_p-value	E-value	tests	FASTA_max	pos	neg	PWM_min	TP	%TP	FP	%FP
1	TEAD4_HUMAN.H11MO.0.A	RCATTCCWGRVAK	2.37e-155	3.01e-152	1.21e-149	1274	1150	1150	1150	2.94	731	63.57	135	11.74
2	TEAD1_HUMAN.H11MO.0.A	RCATTCCWGSCW	5.07e-142	5.78e-139	2.32e-136	1140	1150	1150	1150	1.38	817	71.04	226	19.65
3	FOSL2_HUMAN.H11MO.0.A	NDRTGAGTCAYH	1.47e-58	7.46e-56	3e-53	507	1150	1150	1150	1.37	395	34.35	89	7.74
4	FOSL1_HUMAN.H11MO.0.A	KRVTGAGTCAYH	2.37e-57	1.24e-54	4.97e-52	522	1150	1150	1150	1.34	401	34.87	95	8.26
5	FOS_HUMAN.H11MO.0.A	VTGAGTCAB	5.73e-57	4.22e-54	1.7e-51	737	1150	1150	1150	2.35	398	34.61	94	8.17
6	FOSB_HUMAN.H11MO.0.A	RTGAGTCAB	8.17e-56	6.99e-53	2.81e-50	856	1150	1150	1150	4.44	352	30.61	70	6.09
7	JUN_HUMAN.H11MO.0.A	DRTGAGTCAYH	8.14e-55	4.65e-52	1.87e-49	572	1150	1150	1150	1.99	363	31.57	78	6.78
8	JUND_HUMAN.H11MO.0.A	RRTGAGTCAYY	1.48e-54	9.4e-52	3.78e-49	635	1150	1150	1150	3.4	327	28.43	59	5.13
9	JUNB_HUMAN.H11MO.0.A	DVTGAGTCABH	2.19e-52	1.54e-49	6.19e-47	702	1150	1150	1150	3.23	342	29.74	71	6.17
10	ETV4_HUMAN.H11MO.0.B	VRCAGGAARBR	5.02e-44	7.31e-41	2.94e-38	1458	1150	1150	1150	2.35	621	54	297	25.83
11	ERG_HUMAN.H11MO.0.A	RRRSAGGAAGYGG	1.58e-38	1.57e-35	6.33e-33	994	1150	1150	1150	1.99	515	44.78	227	19.74
12	MAZ_HUMAN.H11MO.0.A	GGGGGAGGGGGDGRGRRRGRRG	6.64e-38	7.31e-35	2.94e-32	1101	1150	1150	1150	16.9	357	31.04	113	9.83
13	ETV5_HUMAN.H11MO.0.C	RRRSAGGAARDGRV	1.11e-37	1.69e-34	6.78e-32	1518	1150	1150	1150	2.18	654	56.87	351	30.52
14	ZBT17_HUMAN.H11MO.0.A	SRRGGWGGGGGAGGGGMRR	2.27e-36	2.94e-33	1.18e-30	1294	1150	1150	1150	5.15	483	42	209	18.17
15	KLF15_HUMAN.H11MO.0.A	RGGGMGGRGVDGGGGGRGG	1.57e-35	1.27e-32	5.12e-30	809	1150	1150	1150	1.82	478	41.57	208	18.09
16	ZN467_HUMAN.H11MO.0.C	GGGGAGGGGRRGGRGRRGGRRR	2.89e-35	2.23e-32	8.96e-30	772	1150	1150	1150	6.31	361	31.39	123	10.7
17	ETS1_HUMAN.H11MO.0.A	RRRCMGGAAGTGG	3.47e-35	2.68e-32	1.08e-29	771	1150	1150	1150	1.33	479	41.65	210	18.26
18	VEZF1_HUMAN.H11MO.0.C	GGRRRRGRRGGAGGGGGRGRRR	2.97e-35	3.58e-32	1.44e-29	1205	1150	1150	1150	20.1	326	28.35	100	8.7
19	EGR2_HUMAN.H11MO.0.A	GRGRRKGWGKGGGHGGRG	1.11e-34	1.19e-31	4.77e-29	1065	1150	1150	1150	4.83	411	35.74	160	13.91
20	FLI1_HUMAN.H11MO.0.A	SRRGGMAGGAAGGRRRGR	4.52e-34	4.11e-31	1.65e-28	909	1150	1150	1150	4.78	344	29.91	115	10
21	ETV2_HUMAN.H11MO.0.B	RRARRCAGGAARYRGS	9.52e-32	5.6e-29	2.25e-26	588	1150	1150	1150	1.07	414	36	172	14.96
22	E2F7_HUMAN.H11MO.0.B	GDGGCGGGAARDR	5.22e-31	5.63e-28	2.26e-25	1080	1150	1150	1150	2.2	461	40.09	211	18.35
23	PATZ1_HUMAN.H11MO.0.C	GGGGMGGGGGMKGGRRVGGVRG	5.64e-31	6.14e-28	2.47e-25	1088	1150	1150	1150	9.24	361	31.39	136	11.83
24	SP4_HUMAN.H11MO.0.A	SRGVARGRGGCGGRGCHDRR	2.06e-28	2.13e-25	8.56e-23	1032	1150	1150	1150	5.17	352	30.61	138	12
25	WT1_HUMAN.H11MO.0.C	RGGVGGGGGAGGRGGVGGRG	1.58e-27	1.24e-24	4.97e-22	783	1150	1150	1150	3.83	386	33.57	166	14.43
26	E2F3_HUMAN.H11MO.0.A	DDGGCGGGAAA	1.65e-27	1.99e-24	8.01e-22	1205	1150	1150	1150	1.25	655	56.96	397	34.52
27	ETS2_HUMAN.H11MO.0.B	RDVRGGAARVRRR	3.03e-27	4.65e-24	1.87e-21	1534	1150	1150	1150	1.52	767	66.7	511	44.43
28	BC11A_HUMAN.H11MO.0.A	RAAAGAGGAAGTGARAV	1.78e-26	2.31e-23	9.29e-21	1295	1150	1150	1150	1.15	745	64.78	492	42.78
29	ZN341_HUMAN.H11MO.0.C	GRGGRRRRGGRGRRGGAASAGC	2.14e-26	2.43e-23	9.75e-21	1131	1150	1150	1150	5.95	404	35.13	184	16
30	IRF3_HUMAN.H11MO.0.B	RAAARGGAAAVDGAAASDGA	5.32e-26	4.37e-23	1.76e-20	821	1150	1150	1150	2.12	430	37.39	206	17.91
31	ELF5_HUMAN.H11MO.0.A	VGRASSAGGAAGTRV	6.12e-25	4.6e-22	1.85e-19	751	1150	1150	1150	1.04	490	42.61	260	22.61
32	TAF1_HUMAN.H11MO.0.A	RARRWGGCGGMGGMGR	7.89e-25	7.59e-22	3.05e-19	962	1150	1150	1150	3.35	289	25.13	106	9.22
33	ZN263_HUMAN.H11MO.0.A	GGGAGGAGGRRGRGGRGGRR	1.14e-24	9.79e-22	3.94e-19	856	1150	1150	1150	1.12	546	47.48	310	26.96
34	KLF6_HUMAN.H11MO.0.A	GSRRGGGHGGGGMHGGGRV	1.25e-24	1.43e-21	5.73e-19	1138	1150	1150	1150	13.1	267	23.22	92	8
35	EGR1_HUMAN.H11MO.0.A	VDRDGCGKGGGYGGRRR	6.67e-24	6.64e-21	2.67e-18	995	1150	1150	1150	2.7	424	36.87	210	18.26
36	ELF3_HUMAN.H11MO.0.A	RAABVAGGAAGTRR	5.09e-23	3.19e-20	1.28e-17	627	1150	1150	1150	1.03	418	36.35	209	18.17
37	ZN770_HUMAN.H11MO.0.C	GGGAGGCYGAGGBRGGAGGATC	5.95e-23	4.09e-20	1.64e-17	687	1150	1150	1150	1.33	447	38.87	233	20.26
38	ELF1_HUMAN.H11MO.0.A	VRACCCGGAAGTGS	8.81e-23	4.63e-20	1.86e-17	526	1150	1150	1150	1.08	354	30.78	160	13.91
39	ETV1_HUMAN.H11MO.0.A	SRCCGGAAGYG	1.17e-22	6.65e-20	2.67e-17	569	1150	1150	1150	1.03	382	33.22	182	15.83
40	BACH2_HUMAN.H11MO.0.A	TGCTGAGTCAB	4.39e-22	2.46e-19	9.89e-17	560	1150	1150	1150	1.97	280	24.35	109	9.48
41	KLF5_HUMAN.H11MO.0.A	WGGGTGKGGCDGGG	8.66e-22	8.63e-19	3.47e-16	996	1150	1150	1150	3.95	367	31.91	174	15.13
42	RUNX1_HUMAN.H11MO.0.A	BYTGTGGTTWB	2.01e-21	1.27e-18	5.1e-16	631	1150	1150	1150	1.11	398	34.61	200	17.39
43	FEV_HUMAN.H11MO.0.B	GCVGGAAGYG	1.12e-21	1.6e-18	6.42e-16	1433	1150	1150	1150	1.89	429	37.3	224	19.48
44	ELF2_HUMAN.H11MO.0.C	RAVCCGGAAGTGR	3.22e-21	1.88e-18	7.56e-16	584	1150	1150	1150	1.59	308	26.78	132	11.48
45	NFAC1_HUMAN.H11MO.0.B	AWGGAAARWVWGAMW	2.13e-21	2.68e-18	1.08e-15	1257	1150	1150	1150	1.54	606	52.7	382	33.22
46	EHF_HUMAN.H11MO.0.B	VWACSAGGAAGTDVS	5.75e-21	2.89e-18	1.16e-15	503	1150	1150	1150	1.23	323	28.09	144	12.52
47	RUNX3_HUMAN.H11MO.0.A	BYTGTGGTTW	1.09e-20	6.73e-18	2.7e-15	615	1150	1150	1150	2.75	239	20.78	86	7.48
48	PRDM6_HUMAN.H11MO.0.C	RRRARGAAAAAAA	1.01e-20	1.15e-17	4.6e-15	1136	1150	1150	1150	4.04	379	32.96	188	16.35
49	RXRA_HUMAN.H11MO.0.A	VRGDVRGNVARAGGTCARRG	1.54e-20	2.08e-17	8.34e-15	1345	1150	1150	1150	4.08	383	33.3	192	16.7
50	KLF1_HUMAN.H11MO.0.A	DGGGYGKGGCYGGG	3.39e-20	2.41e-17	9.69e-15	712	1150	1150	1150	17.9	140	12.17	29	2.52
51	RUNX2_HUMAN.H11MO.0.A	KGKYTGTGGTTTKK	6.39e-20	5.37e-17	2.16e-14	840	1150	1150	1150	1.34	457	39.74	256	22.26
52	KLF3_HUMAN.H11MO.0.B	GGRGVDGGGCGGGGCYGGG	1.04e-19	7.95e-17	3.2e-14	768	1150	1150	1150	30	138	12	29	2.52
53	SP2_HUMAN.H11MO.0.A	GGSSVGGGGGCGGGGCCDGSGS	3e-19	2.3e-16	9.23e-14	765	1150	1150	1150	2.14	404	35.13	215	18.7
54	ZN394_HUMAN.H11MO.0.C	NRARWRGAAWNGAMWGRAAK	2.42e-19	2.91e-16	1.17e-13	1202	1150	1150	1150	1.81	568	49.39	358	31.13
55	FOXP1_HUMAN.H11MO.0.A	TBTGTTTMY	7.35e-19	7.52e-16	3.02e-13	1024	1150	1150	1150	1.29	540	46.96	335	29.13
56	ELK1_HUMAN.H11MO.0.B	RCCGGAAGTGV	5.22e-18	1.95e-15	7.83e-13	373	1150	1150	1150	1.16	246	21.39	100	8.7
57	ZSC22_HUMAN.H11MO.0.C	RGKCWGAGGGMGGAGG	2.9e-18	2.04e-15	8.2e-13	703	1150	1150	1150	2.14	342	29.74	170	14.78
58	NFE2_HUMAN.H11MO.0.A	VVRTGACTCAGCA	5.85e-18	2.56e-15	1.03e-12	437	1150	1150	1150	1.08	293	25.48	134	11.65
59	Z354A_HUMAN.H11MO.0.C	RTTTARWYCATTTACATTTAATGT	9.99e-18	4.08e-15	1.64e-12	408	1150	1150	1150	1.47	274	23.83	121	10.52
60	TBX21_HUMAN.H11MO.0.A	GDGDRGGTGTGRV	3.51e-18	5.1e-15	2.05e-12	1452	1150	1150	1150	1.3	686	59.65	479	41.65
61	FOXJ3_HUMAN.H11MO.0.A	TTGTTTATKKTTW	2.32e-17	6.74e-15	2.71e-12	291	1150	1150	1150	1.37	201	17.48	72	6.26
62	BACH1_HUMAN.H11MO.0.A	TGCTGAGTCABSS	2.37e-17	1.35e-14	5.41e-12	568	1150	1150	1150	1.05	368	32	195	16.96
63	FOXM1_HUMAN.H11MO.0.A	TGTTTRCTYWKB	1.49e-17	1.38e-14	5.53e-12	924	1150	1150	1150	2.35	308	26.78	147	12.78
64	E2F6_HUMAN.H11MO.0.A	DGGGCGGGARRVR	3.69e-17	3.58e-14	1.44e-11	970	1150	1150	1150	1.03	584	50.78	386	33.57
65	ZN281_HUMAN.H11MO.0.A	RGGWGGGGGAGGGGV	6.23e-17	4.71e-14	1.89e-11	756	1150	1150	1150	1.56	415	36.09	236	20.52
66	FOXA2_HUMAN.H11MO.0.A	TGTTTACWYWGB	1.03e-16	4.73e-14	1.9e-11	458	1150	1150	1150	1.04	307	26.7	150	13.04
67	SP3_HUMAN.H11MO.0.B	SGVVGGGGGCGGGGCBRGSS	5.51e-17	5.23e-14	2.1e-11	950	1150	1150	1150	2.98	440	38.26	257	22.35
68	NF2L2_HUMAN.H11MO.0.A	WWYTGCTGAGTCAT	3.31e-16	8e-14	3.22e-11	242	1150	1150	1150	1.27	170	14.78	56	4.87
69	STAT2_HUMAN.H11MO.0.A	RRGRAAAHGAAACTGAAAV	2.48e-16	9.55e-14	3.84e-11	386	1150	1150	1150	1.81	224	19.48	91	7.91
70	PEBB_HUMAN.H11MO.0.C	TYTGTGGTYWB	1.61e-16	1.19e-13	4.78e-11	741	1150	1150	1150	4.2	189	16.43	67	5.83
71	FOXJ2_HUMAN.H11MO.0.C	TGTTTRTTTW	4.17e-16	2.01e-13	8.08e-11	482	1150	1150	1150	1.11	315	27.39	159	13.83
72	FOXO1_HUMAN.H11MO.0.A	KBBYTGTTTHCN	1.79e-16	2.06e-13	8.29e-11	1152	1150	1150	1150	1.92	439	38.17	259	22.52
73	MEF2B_HUMAN.H11MO.0.A	DKKKCTATTTTTRG	3.55e-16	2.35e-13	9.44e-11	662	1150	1150	1150	2.46	272	23.65	126	10.96
74	SP1_HUMAN.H11MO.0.A	VGGGGGCGGGGCCKGGGGGGGG	1.04e-15	3.21e-13	1.29e-10	308	1150	1150	1150	8.17	132	11.48	35	3.04
75	ZFP82_HUMAN.H11MO.0.C	TTCCADTTCAYTAATTYTCTCTTC	8.19e-16	4.21e-13	1.69e-10	514	1150	1150	1150	1.49	331	28.78	173	15.04
76	FOXA1_HUMAN.H11MO.0.A	TGTTTACWYWGB	8.84e-16	4.35e-13	1.75e-10	492	1150	1150	1150	1.11	313	27.22	159	13.83
77	NFKB1_HUMAN.H11MO.0.A	AGGGAAAK	3.03e-16	4.56e-13	1.83e-10	1504	1150	1150	1150	2.17	548	47.65	358	31.13
78	GABPA_HUMAN.H11MO.0.A	GVVRCCGGAAGTGV	1.73e-15	7.2e-13	2.9e-10	416	1150	1150	1150	1.37	242	21.04	107	9.3
79	SMAD3_HUMAN.H11MO.0.B	SYCTSHCWSCWS	4.74e-16	8.4e-13	3.38e-10	1775	1150	1150	1150	2.08	646	56.17	453	39.39
80	ANDR_HUMAN.H11MO.0.A	TGTTCTTKKYTGTTTRYW	1.49e-15	9.47e-13	3.81e-10	635	1150	1150	1150	1.91	300	26.09	150	13.04
81	SRBP2_HUMAN.H11MO.0.B	VSGTGGGGWGABG	7.93e-16	1.05e-12	4.21e-10	1320	1150	1150	1150	3.95	255	22.17	115	10
82	MEF2C_HUMAN.H11MO.0.A	DKCTATTTTTRGM	4.21e-15	2.26e-12	9.07e-10	536	1150	1150	1150	1.66	271	23.57	130	11.3
83	MEF2A_HUMAN.H11MO.0.A	DKCTATTTTTRGM	7.43e-15	4e-12	1.61e-09	538	1150	1150	1150	2.4	230	20	101	8.78
84	ZN121_HUMAN.H11MO.0.C	CTGGGCAACABAGYRAGACC	4.78e-14	6.4e-12	2.57e-09	134	1150	1150	1150	44.4	52	4.52	2	0.17
85	KLF4_HUMAN.H11MO.0.A	WGGGYGKGGC	1.13e-14	7.32e-12	2.94e-09	647	1150	1150	1150	5.86	184	16	70	6.09
86	FOXK1_HUMAN.H11MO.0.A	TGTTTMCHTT	1.68e-14	1.78e-11	7.15e-09	1060	1150	1150	1150	1.42	512	44.52	336	29.22
87	TFDP1_HUMAN.H11MO.0.C	RRRRGGCGGGAARN	2.61e-14	2.05e-11	8.24e-09	787	1150	1150	1150	2.42	278	24.17	139	12.09
88	STA5A_HUMAN.H11MO.0.A	TTCYRRGAAR	8.53e-14	4.32e-11	1.74e-08	507	1150	1150	1150	1.11	313	27.22	169	14.7
89	SALL4_HUMAN.H11MO.0.B	GSDGGGWGGG	5.41e-14	7.68e-11	3.09e-08	1420	1150	1150	1150	2.25	609	52.96	431	37.48
90	FOXO3_HUMAN.H11MO.0.B	BYTGTTTACH	3.62e-13	2.22e-10	8.91e-08	612	1150	1150	1150	1.12	360	31.3	211	18.35
91	MEF2D_HUMAN.H11MO.0.A	DKCTATTTTTAG	9.09e-13	3.48e-10	1.4e-07	383	1150	1150	1150	2	178	15.48	73	6.35
92	E2F4_HUMAN.H11MO.0.A	SRGGGCGGGAARD	7.95e-13	4.4e-10	1.77e-07	554	1150	1150	1150	1.04	348	30.26	203	17.65
93	BATF_HUMAN.H11MO.0.A	RBTYTCRDWATGASTCAB	3.07e-12	1.57e-09	6.33e-07	512	1150	1150	1150	1.5	271	23.57	144	12.52
94	IRF1_HUMAN.H11MO.0.A	RAAANWGAAASTGAAASYRR	5.09e-12	1.86e-09	7.46e-07	365	1150	1150	1150	14.9	97	8.43	25	2.17
95	SUH_HUMAN.H11MO.0.A	VSYSTGGGAAV	1.77e-12	2.16e-09	8.7e-07	1222	1150	1150	1150	2.32	381	33.13	233	20.26
96	COT1_HUMAN.H11MO.0.C	GRGGKSARAGGTCAGGG	2.23e-12	2.38e-09	9.58e-07	1069	1150	1150	1150	1.21	576	50.09	411	35.74
97	ELK4_HUMAN.H11MO.0.A	SVCCGGAAGTGV	8.56e-12	2.87e-09	1.15e-06	335	1150	1150	1150	1.08	217	18.87	105	9.13
98	ZFP28_HUMAN.H11MO.0.C	TTCTATTTCTTCTTGWGTCA	1.29e-11	3.1e-09	1.25e-06	240	1150	1150	1150	1.41	167	14.52	70	6.09
99	FOXP2_HUMAN.H11MO.0.C	BTGTTTACH	5.73e-12	3.94e-09	1.58e-06	687	1150	1150	1150	1.41	343	29.83	204	17.74
100	SPI1_HUMAN.H11MO.0.A	RRAAAGAGGAAGTGRVD	9.6e-12	4.4e-09	1.77e-06	458	1150	1150	1150	1.26	279	24.26	153	13.3
101	IRF8_HUMAN.H11MO.0.B	RAAARRGGAASTGAAASTDR	1.86e-11	6.66e-09	2.68e-06	358	1150	1150	1150	6.53	98	8.52	27	2.35
102	IKZF1_HUMAN.H11MO.0.C	BTGGGARR	5.25e-12	7.73e-09	3.11e-06	1472	1150	1150	1150	3.12	420	36.52	270	23.48
103	FOXA3_HUMAN.H11MO.0.B	CHTGTTTACWTWG	6.29e-11	3.22e-08	1.29e-05	512	1150	1150	1150	1.26	293	25.48	169	14.7
104	NFAC2_HUMAN.H11MO.0.B	TGGAAAAWY	3.74e-11	3.48e-08	1.4e-05	931	1150	1150	1150	1.16	509	44.26	357	31.04
105	RORG_HUMAN.H11MO.0.C	RRAASTRGGTCA	8.21e-11	5.71e-08	2.3e-05	696	1150	1150	1150	1.46	320	27.83	192	16.7
106	PAX5_HUMAN.H11MO.0.A	SCSKGGGCARCVRAGCGWGAC	2.12e-10	7.44e-08	2.99e-05	350	1150	1150	1150	71.1	36	3.13	1	0.09
107	STAT3_HUMAN.H11MO.0.A	SAYTTCCMRGAA	1.16e-10	7.84e-08	3.15e-05	674	1150	1150	1150	1.06	398	34.61	260	22.61
108	BCL6_HUMAN.H11MO.0.A	YKCTTTCYAGGAA	1.2e-10	9.44e-08	3.8e-05	790	1150	1150	1150	2.58	246	21.39	133	11.57
109	STA5B_HUMAN.H11MO.0.A	YTTCYKRGAAAY	1.77e-10	1.05e-07	4.21e-05	593	1150	1150	1150	1.11	347	30.17	217	18.87
110	HXB13_HUMAN.H11MO.0.A	TTTTATDGSH	2.13e-10	1.17e-07	4.71e-05	549	1150	1150	1150	1.17	318	27.65	193	16.78
111	NFIC_HUMAN.H11MO.0.A	CYTGGCHBYMWGCCARG	1.46e-10	1.45e-07	5.83e-05	996	1150	1150	1150	16.2	104	9.04	33	2.87
112	STAT1_HUMAN.H11MO.0.A	YCCVTTTCCHGGAAAWCHC	4.62e-10	1.58e-07	6.33e-05	341	1150	1150	1150	1.12	220	19.13	116	10.09
113	NFAC4_HUMAN.H11MO.0.C	WGGAAAAYTW	1.63e-10	1.65e-07	6.61e-05	1009	1150	1150	1150	1.08	569	49.48	419	36.43
114	SMCA5_HUMAN.H11MO.0.C	GAATBGAATGGAAWC	3.72e-10	1.95e-07	7.83e-05	523	1150	1150	1150	3.47	154	13.39	67	5.83
115	Z324A_HUMAN.H11MO.0.C	KVTCAAACCATCCTTKSCTKSCW	2.86e-10	2.14e-07	8.59e-05	748	1150	1150	1150	1.25	424	36.87	286	24.87
116	E2F1_HUMAN.H11MO.0.A	RRNKGGCGGGAARR	7.78e-10	4.31e-07	0.000173	554	1150	1150	1150	4.16	139	12.09	58	5.04
117	MAFF_HUMAN.H11MO.0.B	TGCTGASTCAGCABTTTT	9.67e-10	5.91e-07	0.000237	611	1150	1150	1150	1.12	363	31.57	236	20.52
118	GATA3_HUMAN.H11MO.0.A	RVAGATAAVAD	1.1e-09	9.71e-07	0.00039	884	1150	1150	1150	1.31	440	38.26	305	26.52
119	HIF1A_HUMAN.H11MO.0.C	GDACGTGM	4.74e-09	1.27e-06	0.000509	267	1150	1150	1150	1.04	172	14.96	85	7.39
120	SOX4_HUMAN.H11MO.0.B	BYCTTTGTYYYB	1.4e-09	1.39e-06	0.00056	992	1150	1150	1150	3.24	290	25.22	175	15.22
121	KLF12_HUMAN.H11MO.0.C	VGGGGCGGGGC	2.68e-09	1.49e-06	0.000601	557	1150	1150	1150	1.17	321	27.91	203	17.65
122	PO2F1_HUMAN.H11MO.0.C	AWKBRWATGSAAWYAW	3.5e-09	1.97e-06	0.000791	563	1150	1150	1150	1.05	341	29.65	221	19.22
123	KLF9_HUMAN.H11MO.0.C	GRRGKGGGCGTGGCC	6.08e-09	1.99e-06	0.000802	328	1150	1150	1150	8.12	84	7.3	26	2.26
124	SOX2_HUMAN.H11MO.0.A	BBCCTTTGTYYYB	2.71e-09	2.77e-06	0.00112	1025	1150	1150	1150	4.17	261	22.7	153	13.3
125	PRDM1_HUMAN.H11MO.0.A	RAAAGTGAAAGTGR	6.32e-09	3.65e-06	0.00147	577	1150	1150	1150	1.05	348	30.26	229	19.91
126	NR1D1_HUMAN.H11MO.0.B	RRRNMASTGGGTCAGDRDR	5.4e-09	6.41e-06	0.00258	1189	1150	1150	1150	1.69	489	42.52	356	30.96
127	SRY_HUMAN.H11MO.0.B	YWTTGTTTH	6.86e-09	6.82e-06	0.00274	995	1150	1150	1150	2.89	270	23.48	163	14.17
128	SPIB_HUMAN.H11MO.0.A	RRAAAGAGGAAGTGARA	2.94e-08	9.19e-06	0.00369	313	1150	1150	1150	1.4	185	16.09	99	8.61
129	ZN322_HUMAN.H11MO.0.B	GWGCCTGSTACWSWGCCTGR	3.73e-08	1.35e-05	0.00542	362	1150	1150	1150	1.6	192	16.7	105	9.13
130	TBP_HUMAN.H11MO.0.A	MTATAAAARS	2.72e-08	1.53e-05	0.00616	563	1150	1150	1150	3.88	79	6.87	25	2.17
131	RARA_HUMAN.H11MO.0.A	GGRRGRTSMRRAGKTCAAGG	2.89e-08	1.95e-05	0.00785	676	1150	1150	1150	2.7	222	19.3	128	11.13
132	ARNT_HUMAN.H11MO.0.B	STACGTGMC	1.21e-07	2.19e-05	0.0088	181	1150	1150	1150	1.01	124	10.78	57	4.96
133	EVX2_HUMAN.H11MO.0.A	KTTTTATKRCYBY	6.4e-08	2.43e-05	0.00977	380	1150	1150	1150	1.69	176	15.3	94	8.17
134	MAF_HUMAN.H11MO.0.A	VAAWBTGCTGASTHWGCMD	3.78e-08	2.57e-05	0.0103	679	1150	1150	1150	1.15	375	32.61	259	22.52
135	MYCN_HUMAN.H11MO.0.A	RGCCACGTGSDS	8.99e-08	2.57e-05	0.0103	286	1150	1150	1150	2.31	100	8.7	40	3.48
136	MXI1_HUMAN.H11MO.0.A	VCACGTGGSNGSBGS	8.19e-08	4.14e-05	0.0167	506	1150	1150	1150	2.38	150	13.04	75	6.52
137	PTF1A_HUMAN.H11MO.0.B	SCAGCTGBYBBYBYYCHC	5.41e-08	4.47e-05	0.018	827	1150	1150	1150	2.54	284	24.7	181	15.74
138	PPARG_HUMAN.H11MO.0.A	MWSTRGGKSARAGGKCA	6.9e-08	6.09e-05	0.0245	882	1150	1150	1150	1.69	377	32.78	263	22.87
139	LYL1_HUMAN.H11MO.0.A	CCAKCTGYTYYCTB	4.84e-08	7.44e-05	0.0299	1537	1150	1150	1150	5.15	115	10	49	4.26
140	IRF7_HUMAN.H11MO.0.C	GAAASYGAAA	1.03e-07	8.98e-05	0.0361	871	1150	1150	1150	1.48	403	35.04	288	25.04
141	HNF1A_HUMAN.H11MO.0.C	DGTTAATKATTAACH	3.08e-07	0.00012	0.0481	388	1150	1150	1150	1.12	232	20.17	143	12.43
142	MAFB_HUMAN.H11MO.0.B	TGCTGASTYAD	1.12e-07	0.000126	0.0507	1123	1150	1150	1150	1.98	323	28.09	217	18.87
143	MAX_HUMAN.H11MO.0.A	VRGCACGTGG	3.73e-07	0.000149	0.0597	398	1150	1150	1150	1.88	144	12.52	74	6.43
144	COT2_HUMAN.H11MO.0.A	CARAGGTCARRGD	2.07e-07	0.000192	0.0771	927	1150	1150	1150	5.19	167	14.52	90	7.83
145	IRF2_HUMAN.H11MO.0.A	RAAAVHGAAAGTGAAASTRV	8.7e-07	0.000203	0.0814	233	1150	1150	1150	1.45	140	12.17	73	6.35
146	ATF2_HUMAN.H11MO.0.B	RRTGABGTCAY	4.75e-07	0.000236	0.0947	496	1150	1150	1150	1.48	217	18.87	132	11.48
147	ATF6A_HUMAN.H11MO.0.B	GKGSTGACGTGG	3.79e-06	0.00025	0.1	66	1150	1150	1150	1.04	51	4.43	15	1.3
148	IRF4_HUMAN.H11MO.0.A	RAAWGRGGAASTGAAASY	6.8e-07	0.00028	0.113	412	1150	1150	1150	1.29	229	19.91	143	12.43
149	FOXC1_HUMAN.H11MO.0.C	CDWTGTTTACTTWRG	1.91e-06	0.000286	0.115	150	1150	1150	1150	1.08	102	8.87	47	4.09
150	MAFK_HUMAN.H11MO.0.A	RAWWHTGCTGASTCAGCA	1.95e-06	0.00033	0.133	169	1150	1150	1150	2.45	83	7.22	34	2.96
151	NKX61_HUMAN.H11MO.0.B	GAYWAATKRSHWWTTAATK	5.35e-07	0.000332	0.133	621	1150	1150	1150	2.51	219	19.04	134	11.65
152	SMCA1_HUMAN.H11MO.0.C	CMARGAAGMATD	3.59e-07	0.000389	0.157	1084	1150	1150	1150	3.31	229	19.91	141	12.26
153	OLIG2_HUMAN.H11MO.0.B	CCAKCTGYTYYYYWBCHB	5.62e-07	0.000496	0.199	883	1150	1150	1150	4.88	165	14.35	91	7.91
154	TBX3_HUMAN.H11MO.0.C	DRAGGTGBSAR	3.81e-07	0.000536	0.215	1406	1150	1150	1150	2.96	295	25.65	197	17.13
155	ZN768_HUMAN.H11MO.0.C	GAGGCHCAGAGAGGTTAAGT	3.57e-06	0.00066	0.265	185	1150	1150	1150	152	18	1.57	0	0
156	RXRB_HUMAN.H11MO.0.C	TSAGGTCASR	8.1e-07	0.000704	0.283	870	1150	1150	1150	10.4	76	6.61	28	2.43
157	ATF3_HUMAN.H11MO.0.A	GGTSACGTGAB	3.01e-06	0.000719	0.289	239	1150	1150	1150	1.67	95	8.26	43	3.74
158	EPAS1_HUMAN.H11MO.0.B	VTACGTGMC	5.44e-06	0.000902	0.363	166	1150	1150	1150	1.01	110	9.57	55	4.78
159	BMAL1_HUMAN.H11MO.0.A	KSCACGTGHSY	3e-06	0.00105	0.423	351	1150	1150	1150	5.54	60	5.22	20	1.74
160	STAT4_HUMAN.H11MO.0.A	YTTCYYRGMAV	1.2e-06	0.00107	0.428	889	1150	1150	1150	1.03	499	43.39	388	33.74
161	REL_HUMAN.H11MO.0.B	DRWRGGGRAATKCCA	1.45e-06	0.00128	0.517	887	1150	1150	1150	4.34	177	15.39	103	8.96
162	HNF1B_HUMAN.H11MO.0.A	DGTTAATRATTAACH	5.66e-06	0.00137	0.55	242	1150	1150	1150	1.73	122	10.61	64	5.57
163	MYC_HUMAN.H11MO.0.A	RCCACGTGCTB	4.95e-06	0.0015	0.604	304	1150	1150	1150	2.78	95	8.26	44	3.83
164	ZNF76_HUMAN.H11MO.0.C	RRKGCMTKCTGGGARWTGTAGT	5.53e-06	0.00162	0.653	294	1150	1150	1150	1.25	182	15.83	111	9.65
165	LEF1_HUMAN.H11MO.0.A	BCCTTTSWWNTBYH	1.5e-06	0.00224	0.899	1494	1150	1150	1150	2.59	379	32.96	277	24.09
166	ITF2_HUMAN.H11MO.0.C	DGCAGSTGKS	2.2e-06	0.00266	1.07	1210	1150	1150	1150	3.69	254	22.09	168	14.61
167	NFAC3_HUMAN.H11MO.0.B	TGGAAAAHY	3.56e-06	0.0028	1.12	786	1150	1150	1150	1.19	414	36	313	27.22
168	FOXO4_HUMAN.H11MO.0.C	TTGTTTAYK	5.47e-06	0.00318	1.28	583	1150	1150	1150	1.34	304	26.43	215	18.7
169	BHE40_HUMAN.H11MO.0.A	DGCACGTGAS	1.29e-05	0.00326	1.31	254	1150	1150	1150	4.22	50	4.35	16	1.39
170	TFAP4_HUMAN.H11MO.0.A	YCAGCTGWKB	7.26e-06	0.00348	1.4	480	1150	1150	1150	1.24	272	23.65	188	16.35
171	ZSC31_HUMAN.H11MO.0.C	RGCAGCAGGGCARTTAKR	6.85e-06	0.00375	1.51	548	1150	1150	1150	1.63	248	21.57	167	14.52
172	TF65_HUMAN.H11MO.0.A	HWGGGRATTTCCMV	9.16e-06	0.00415	1.67	454	1150	1150	1150	1.15	256	22.26	175	15.22
173	SRBP1_HUMAN.H11MO.0.A	DGTSRGGTGAB	4.61e-06	0.0043	1.73	936	1150	1150	1150	1.51	366	31.83	270	23.48
174	ATF1_HUMAN.H11MO.0.B	HRRTGACGYMA	1.9e-05	0.00526	2.11	278	1150	1150	1150	1.42	118	10.26	64	5.57
175	BHA15_HUMAN.H11MO.0.B	SSAGCAGCTGG	9.53e-06	0.0058	2.33	610	1150	1150	1150	4.1	186	16.17	116	10.09
176	TWST1_HUMAN.H11MO.0.A	MCATCTGKWWYYMATTA	2.01e-05	0.00621	2.5	310	1150	1150	1150	4.51	81	7.04	37	3.22
177	HXC9_HUMAN.H11MO.0.C	WTTTATKGCH	1.22e-05	0.00695	2.79	574	1150	1150	1150	1.5	242	21.04	164	14.26
178	OSR2_HUMAN.H11MO.0.C	GBYSCWGCTNCTGYDG	9.14e-06	0.00741	2.98	813	1150	1150	1150	4.54	164	14.26	98	8.52
179	PO3F2_HUMAN.H11MO.0.A	YYCATGCATWTYCATTM	1.31e-05	0.00821	3.3	632	1150	1150	1150	1.16	340	29.57	251	21.83
180	HTF4_HUMAN.H11MO.0.A	DSCAGSTGKG	1.16e-05	0.0121	4.87	1048	1150	1150	1150	3.24	271	23.57	189	16.43
181	HXA9_HUMAN.H11MO.0.B	RTGATTTATKR	2.45e-05	0.0122	4.9	500	1150	1150	1150	5.14	79	6.87	36	3.13
182	ZN418_HUMAN.H11MO.0.C	TGCTTYTRGCYTCTKVY	1.97e-05	0.0123	4.95	628	1150	1150	1150	1.2	328	28.52	242	21.04
183	NF2L1_HUMAN.H11MO.0.C	HGTCATN	1.38e-05	0.0129	5.18	938	1150	1150	1150	2.36	123	10.7	67	5.83
184	CREB1_HUMAN.H11MO.0.A	NRRTGACGTMA	7.07e-05	0.0172	6.9	245	1150	1150	1150	1.14	140	12.17	85	7.39
185	ZN436_HUMAN.H11MO.0.C	TCMRGGARGGCTTCCTGGAGGAGG	0.000731	0.0174	7	24	1150	1150	1150	3.28	20	1.74	4	0.35
186	RORA_HUMAN.H11MO.0.C	AWSTRGGTCARRG	1.67e-05	0.0206	8.26	1246	1150	1150	1150	2.77	292	25.39	209	18.17
187	MYOG_HUMAN.H11MO.0.B	CHSCAGCTGYYYB	4.84e-05	0.0224	9.02	469	1150	1150	1150	22.1	64	5.57	27	2.35
# AME (Analysis of Motif Enrichment): Version 5.0.5 compiled on Jul 15 2019 at 00:31:14
# The format of this file is described at http://meme-suite.org//doc/ame-output-format.html.
# ame --verbose 1 --oc . --scoring avg --method fisher --hit-lo-fraction 0.25 --evalue-report-threshold 10.0 --control --shuffle-- --kmer 2 taz4sa_chip_seq.fasta db/HUMAN/HOCOMOCOv11_core_HUMAN_mono_meme_format.meme

## Sheet: TAZ-CAMTA1.ChIP.AME.Enrichment
rank	motif_ID	consensus	p-value	adj_p-value	E-value	tests	FASTA_max	pos	neg	PWM_min	TP	%TP	FP	%FP
1	TEAD4_HUMAN.H11MO.0.A	RCATTCCWGRVAK	7.68e-166	9.93e-163	3.99e-160	1294	1166	1166	1166	2.69	762	65.35	139	11.92
2	TEAD1_HUMAN.H11MO.0.A	RCATTCCWGSCW	1.24e-154	1.46e-151	5.86e-149	1179	1166	1166	1166	2.34	745	63.89	144	12.35
3	ZBT17_HUMAN.H11MO.0.A	SRRGGWGGGGGAGGGGMRR	1.18e-53	1.67e-50	6.7e-48	1413	1166	1166	1166	4.93	579	49.66	229	19.64
4	MAZ_HUMAN.H11MO.0.A	GGGGGAGGGGGDGRGRRRGRRG	7.39e-52	9.28e-49	3.73e-46	1256	1166	1166	1166	9.09	506	43.4	178	15.27
5	VEZF1_HUMAN.H11MO.0.C	GGRRRRGRRGGAGGGGGRGRRR	6.84e-48	9.24e-45	3.71e-42	1350	1166	1166	1166	22.1	376	32.25	100	8.58
6	EGR2_HUMAN.H11MO.0.A	GRGRRKGWGKGGGHGGRG	1.25e-47	1.39e-44	5.61e-42	1113	1166	1166	1166	7.43	391	33.53	110	9.43
7	ZN467_HUMAN.H11MO.0.C	GGGGAGGGGRRGGRGRRGGRRR	1.51e-46	1.38e-43	5.56e-41	917	1166	1166	1166	6.35	451	38.68	153	13.12
8	KLF15_HUMAN.H11MO.0.A	RGGGMGGRGVDGGGGGRGG	9.52e-45	8.79e-42	3.53e-39	923	1166	1166	1166	2.01	552	47.34	235	20.15
9	ETV4_HUMAN.H11MO.0.B	VRCAGGAARBR	9.34e-45	1.43e-41	5.75e-39	1531	1166	1166	1166	1.6	777	66.64	441	37.82
10	ERG_HUMAN.H11MO.0.A	RRRSAGGAAGYGG	3.1e-40	3.19e-37	1.28e-34	1029	1166	1166	1166	1.02	672	57.63	356	30.53
11	ETV5_HUMAN.H11MO.0.C	RRRSAGGAARDGRV	2.53e-40	4.06e-37	1.63e-34	1605	1166	1166	1166	1.7	780	66.9	462	39.62
12	KLF6_HUMAN.H11MO.0.A	GSRRGGGHGGGGMHGGGRV	3.58e-40	4.47e-37	1.8e-34	1247	1166	1166	1166	2.31	619	53.09	308	26.42
13	E2F7_HUMAN.H11MO.0.B	GDGGCGGGAARDR	2.19e-39	2.72e-36	1.09e-33	1242	1166	1166	1166	2.02	573	49.14	271	23.24
14	SP4_HUMAN.H11MO.0.A	SRGVARGRGGCGGRGCHDRR	4.14e-38	4.66e-35	1.87e-32	1127	1166	1166	1166	4.09	459	39.37	184	15.78
15	EGR1_HUMAN.H11MO.0.A	VDRDGCGKGGGYGGRRR	6.76e-38	7.18e-35	2.89e-32	1063	1166	1166	1166	2.75	466	39.97	190	16.3
16	ZN341_HUMAN.H11MO.0.C	GRGGRRRRGGRGRRGGAASAGC	1.92e-36	2.46e-33	9.9e-31	1279	1166	1166	1166	10.1	365	31.3	122	10.46
17	ZN263_HUMAN.H11MO.0.A	GGGAGGAGGRRGRGGRGGRR	1.05e-35	1.02e-32	4.11e-30	979	1166	1166	1166	2.39	511	43.83	233	19.98
18	ZN770_HUMAN.H11MO.0.C	GGGAGGCYGAGGBRGGAGGATC	1.87e-35	1.49e-32	5.97e-30	793	1166	1166	1166	1.43	516	44.25	238	20.41
19	PATZ1_HUMAN.H11MO.0.C	GGGGMGGGGGMKGGRRVGGVRG	1.41e-35	1.72e-32	6.91e-30	1220	1166	1166	1166	5.92	493	42.28	219	18.78
20	FLI1_HUMAN.H11MO.0.A	SRRGGMAGGAAGGRRRGR	6.82e-35	7.12e-32	2.86e-29	1043	1166	1166	1166	2.78	476	40.82	208	17.84
21	IRF3_HUMAN.H11MO.0.B	RAAARGGAAAVDGAAASDGA	1.54e-34	1.41e-31	5.68e-29	919	1166	1166	1166	1.99	502	43.05	230	19.73
22	WT1_HUMAN.H11MO.0.C	RGGVGGGGGAGGRGGVGGRG	2.61e-34	2.4e-31	9.67e-29	920	1166	1166	1166	6.8	410	35.16	160	13.72
23	ZN281_HUMAN.H11MO.0.A	RGGWGGGGGAGGGGV	3.57e-34	3.01e-31	1.21e-28	845	1166	1166	1166	12.3	288	24.7	79	6.78
24	BC11A_HUMAN.H11MO.0.A	RAAAGAGGAAGTGARAV	2.56e-34	3.46e-31	1.39e-28	1352	1166	1166	1166	1.49	720	61.75	427	36.62
25	ETS1_HUMAN.H11MO.0.A	RRRCMGGAAGTGG	1.03e-33	7.65e-31	3.07e-28	740	1166	1166	1166	1.08	492	42.2	225	19.3
26	IRF1_HUMAN.H11MO.0.A	RAAANWGAAASTGAAASYRR	4.36e-30	1.84e-27	7.39e-25	422	1166	1166	1166	1.15	315	27.02	107	9.18
27	ETS2_HUMAN.H11MO.0.B	RDVRGGAARVRRR	3.46e-30	5.83e-27	2.35e-24	1687	1166	1166	1166	1.21	915	78.47	659	56.52
28	KLF3_HUMAN.H11MO.0.B	GGRGVDGGGCGGGGCYGGG	9.8e-30	8.76e-27	3.52e-24	894	1166	1166	1166	4.95	374	32.08	149	12.78
29	ETV2_HUMAN.H11MO.0.B	RRARRCAGGAARYRGS	9.48e-29	5.33e-26	2.14e-23	562	1166	1166	1166	1.89	312	26.76	109	9.35
30	NFAC1_HUMAN.H11MO.0.B	AWGGAAARWVWGAMW	1.31e-28	1.73e-25	6.97e-23	1324	1166	1166	1166	2.74	517	44.34	266	22.81
31	KLF5_HUMAN.H11MO.0.A	WGGGTGKGGCDGGG	1.78e-28	1.96e-25	7.87e-23	1100	1166	1166	1166	4.02	411	35.25	181	15.52
32	TAF1_HUMAN.H11MO.0.A	RARRWGGCGGMGGMGR	3.04e-28	3.18e-25	1.28e-22	1047	1166	1166	1166	2.17	442	37.91	206	17.67
33	FOXP1_HUMAN.H11MO.0.A	TBTGTTTMY	2.64e-27	2.73e-24	1.1e-21	1036	1166	1166	1166	2.34	400	34.31	177	15.18
34	TBX21_HUMAN.H11MO.0.A	GDGDRGGTGTGRV	2.01e-27	2.97e-24	1.19e-21	1479	1166	1166	1166	1.62	574	49.23	321	27.53
35	SALL4_HUMAN.H11MO.0.B	GSDGGGWGGG	1.95e-27	3e-24	1.21e-21	1539	1166	1166	1166	2.59	634	54.37	376	32.25
36	ZSC22_HUMAN.H11MO.0.C	RGKCWGAGGGMGGAGG	6.73e-27	5.31e-24	2.13e-21	789	1166	1166	1166	2.38	370	31.73	156	13.38
37	SP2_HUMAN.H11MO.0.A	GGSSVGGGGGCGGGGCCDGSGS	1.87e-26	1.66e-23	6.68e-21	888	1166	1166	1166	3.28	443	37.99	214	18.35
38	SP3_HUMAN.H11MO.0.B	SGVVGGGGGCGGGGCBRGSS	3.81e-26	4.23e-23	1.7e-20	1111	1166	1166	1166	22	257	22.04	81	6.95
39	STAT2_HUMAN.H11MO.0.A	RRGRAAAHGAAACTGAAAV	3.77e-25	1.68e-22	6.76e-20	446	1166	1166	1166	1.17	317	27.19	124	10.63
40	E2F3_HUMAN.H11MO.0.A	DDGGCGGGAAA	4.46e-25	5.84e-22	2.35e-19	1310	1166	1166	1166	1.3	683	58.58	435	37.31
41	FOSL1_HUMAN.H11MO.0.A	KRVTGAGTCAYH	1.18e-23	4.69e-21	1.88e-18	396	1166	1166	1166	2.65	228	19.55	70	6
42	FEV_HUMAN.H11MO.0.B	GCVGGAAGYG	4.1e-24	6.59e-21	2.65e-18	1605	1166	1166	1166	1.21	794	68.1	554	47.51
43	KLF1_HUMAN.H11MO.0.A	DGGGYGKGGCYGGG	1.28e-23	1.05e-20	4.22e-18	823	1166	1166	1166	1.5	467	40.05	246	21.1
44	ELF5_HUMAN.H11MO.0.A	VGRASSAGGAAGTRV	1.27e-23	1.06e-20	4.24e-18	832	1166	1166	1166	1.15	507	43.48	280	24.01
45	JUND_HUMAN.H11MO.0.A	RRTGAGTCAYY	2.21e-23	1.11e-20	4.46e-18	501	1166	1166	1166	8.11	157	13.46	31	2.66
46	ZFP82_HUMAN.H11MO.0.C	TTCCADTTCAYTAATTYTCTCTTC	2.56e-23	1.5e-20	6.04e-18	586	1166	1166	1166	1.4	395	33.88	189	16.21
47	TFDP1_HUMAN.H11MO.0.C	RRRRGGCGGGAARN	2.86e-23	2.73e-20	1.1e-17	955	1166	1166	1166	2.45	353	30.27	157	13.46
48	JUN_HUMAN.H11MO.0.A	DRTGAGTCAYH	6.97e-23	3.23e-20	1.3e-17	463	1166	1166	1166	7.47	157	13.46	32	2.74
49	ELF3_HUMAN.H11MO.0.A	RAABVAGGAAGTRR	5.59e-23	3.66e-20	1.47e-17	655	1166	1166	1166	1.3	397	34.05	192	16.47
50	FOSL2_HUMAN.H11MO.0.A	NDRTGAGTCAYH	1.08e-22	4.13e-20	1.66e-17	383	1166	1166	1166	2.69	222	19.04	69	5.92
51	FOS_HUMAN.H11MO.0.A	VTGAGTCAB	3.92e-22	2.3e-19	9.25e-17	587	1166	1166	1166	8.88	173	14.84	42	3.6
52	PRDM6_HUMAN.H11MO.0.C	RRRARGAAAAAAA	2.31e-22	2.84e-19	1.14e-16	1231	1166	1166	1166	10	264	22.64	97	8.32
53	ZN121_HUMAN.H11MO.0.C	CTGGGCAACABAGYRAGACC	2.38e-21	3.03e-19	1.22e-16	127	1166	1166	1166	3.8	87	7.46	5	0.43
54	FOXK1_HUMAN.H11MO.0.A	TGTTTMCHTT	3.4e-22	3.54e-19	1.43e-16	1042	1166	1166	1166	1.67	465	39.88	251	21.53
55	KLF4_HUMAN.H11MO.0.A	WGGGYGKGGC	6.54e-22	4.85e-19	1.95e-16	742	1166	1166	1166	2.21	359	30.79	167	14.32
56	FOSB_HUMAN.H11MO.0.A	RTGAGTCAB	2.2e-21	1.61e-18	6.46e-16	729	1166	1166	1166	3.84	238	20.41	83	7.12
57	E2F6_HUMAN.H11MO.0.A	DGGGCGGGARRVR	2.76e-21	3.16e-18	1.27e-15	1147	1166	1166	1166	2.91	399	34.22	201	17.24
58	SP1_HUMAN.H11MO.0.A	VGGGGGCGGGGCCKGGGGGGGG	8.47e-21	3.45e-18	1.39e-15	407	1166	1166	1166	1.28	288	24.7	119	10.21
59	PRDM1_HUMAN.H11MO.0.A	RAAAGTGAAAGTGR	5.6e-21	3.97e-18	1.6e-15	708	1166	1166	1166	1.35	401	34.39	204	17.5
60	SUH_HUMAN.H11MO.0.A	VSYSTGGGAAV	9.56e-21	1.22e-17	4.92e-15	1279	1166	1166	1166	1.01	751	64.41	528	45.28
61	FOXO1_HUMAN.H11MO.0.A	KBBYTGTTTHCN	1.24e-20	1.48e-17	5.94e-15	1189	1166	1166	1166	1.32	609	52.23	388	33.28
62	JUNB_HUMAN.H11MO.0.A	DVTGAGTCABH	3.31e-20	1.79e-17	7.19e-15	540	1166	1166	1166	3.3	223	19.13	77	6.6
63	FOXJ3_HUMAN.H11MO.0.A	TTGTTTATKKTTW	1.08e-19	2.93e-17	1.18e-14	272	1166	1166	1166	5.64	138	11.84	29	2.49
64	ZN394_HUMAN.H11MO.0.C	NRARWRGAAWNGAMWGRAAK	1.48e-19	1.89e-16	7.58e-14	1276	1166	1166	1166	2.11	566	48.54	354	30.36
65	IRF2_HUMAN.H11MO.0.A	RAAAVHGAAAGTGAAASTRV	7.81e-19	2.19e-16	8.8e-14	280	1166	1166	1166	1.31	199	17.07	66	5.66
66	NFKB1_HUMAN.H11MO.0.A	AGGGAAAK	5.7e-19	9.2e-16	3.7e-13	1613	1166	1166	1166	1.28	816	69.98	608	52.14
67	E2F4_HUMAN.H11MO.0.A	SRGGGCGGGAARD	3.23e-18	2.36e-15	9.47e-13	729	1166	1166	1166	5.17	196	16.81	66	5.66
68	EHF_HUMAN.H11MO.0.B	VWACSAGGAAGTDVS	4.75e-18	2.42e-15	9.72e-13	509	1166	1166	1166	1.14	323	27.7	156	13.38
69	ANDR_HUMAN.H11MO.0.A	TGTTCTTKKYTGTTTRYW	1.55e-17	1.01e-14	4.06e-12	651	1166	1166	1166	1.94	320	27.44	156	13.38
70	ELF1_HUMAN.H11MO.0.A	VRACCCGGAAGTGS	3.04e-17	1.61e-14	6.46e-12	529	1166	1166	1166	1.04	349	29.93	180	15.44
71	ELF2_HUMAN.H11MO.0.C	RAVCCGGAAGTGR	5.34e-17	3.15e-14	1.27e-11	590	1166	1166	1166	1.03	381	32.68	207	17.75
72	KLF12_HUMAN.H11MO.0.C	VGGGGCGGGGC	1.13e-16	7.13e-14	2.87e-11	634	1166	1166	1166	1.56	343	29.42	178	15.27
73	LYL1_HUMAN.H11MO.0.A	CCAKCTGYTYYCTB	8.92e-17	1.45e-13	5.82e-11	1624	1166	1166	1166	1.64	614	52.66	416	35.68
74	SPI1_HUMAN.H11MO.0.A	RRAAAGAGGAAGTGRVD	3.64e-16	1.83e-13	7.36e-11	503	1166	1166	1166	1.09	331	28.39	171	14.67
75	MEF2B_HUMAN.H11MO.0.A	DKKKCTATTTTTRG	2.59e-16	1.87e-13	7.53e-11	723	1166	1166	1166	5.93	169	14.49	55	4.72
76	ETV1_HUMAN.H11MO.0.A	SRCCGGAAGYG	8.22e-16	4.74e-13	1.9e-10	576	1166	1166	1166	1.02	371	31.82	205	17.58
77	RXRA_HUMAN.H11MO.0.A	VRGDVRGNVARAGGTCARRG	4.91e-16	6.92e-13	2.78e-10	1408	1166	1166	1166	2.45	518	44.43	331	28.39
78	MEF2C_HUMAN.H11MO.0.A	DKCTATTTTTRGM	1.95e-15	1.14e-12	4.56e-10	581	1166	1166	1166	1.43	315	27.02	162	13.89
79	MEF2A_HUMAN.H11MO.0.A	DKCTATTTTTRGM	2.07e-15	1.21e-12	4.88e-10	585	1166	1166	1166	1.4	325	27.87	170	14.58
80	FOXP2_HUMAN.H11MO.0.C	BTGTTTACH	2.74e-15	1.97e-12	7.9e-10	718	1166	1166	1166	1.11	427	36.62	255	21.87
81	E2F1_HUMAN.H11MO.0.A	RRNKGGCGGGAARR	3.74e-15	2.74e-12	1.1e-09	733	1166	1166	1166	1.43	380	32.59	216	18.52
82	FOXO3_HUMAN.H11MO.0.B	BYTGTTTACH	7.39e-15	4.69e-12	1.88e-09	634	1166	1166	1166	1.17	372	31.9	211	18.1
83	SRY_HUMAN.H11MO.0.B	YWTTGTTTH	6.53e-15	6.74e-12	2.71e-09	1032	1166	1166	1166	4.35	212	18.18	88	7.55
84	Z354A_HUMAN.H11MO.0.C	RTTTARWYCATTTACATTTAATGT	1.48e-14	6.85e-12	2.75e-09	464	1166	1166	1166	1.65	285	24.44	143	12.26
85	SMCA5_HUMAN.H11MO.0.C	GAATBGAATGGAAWC	1.71e-14	1.04e-11	4.18e-09	609	1166	1166	1166	5.01	130	11.15	37	3.17
86	MEF2D_HUMAN.H11MO.0.A	DKCTATTTTTAG	2.97e-14	1.22e-11	4.91e-09	411	1166	1166	1166	1.07	270	23.16	133	11.41
87	SOX4_HUMAN.H11MO.0.B	BYCTTTGTYYYB	3.96e-14	4.37e-11	1.76e-08	1105	1166	1166	1166	3.34	323	27.7	175	15.01
88	SMAD3_HUMAN.H11MO.0.B	SYCTSHCWSCWS	8.92e-14	1.61e-10	6.47e-08	1803	1166	1166	1166	2.41	541	46.4	367	31.48
89	RUNX2_HUMAN.H11MO.0.A	KGKYTGTGGTTTKK	2.6e-13	2.08e-10	8.36e-08	801	1166	1166	1166	1.33	420	36.02	261	22.38
90	IRF8_HUMAN.H11MO.0.B	RAAARRGGAASTGAAASTDR	6.38e-13	2.67e-10	1.08e-07	419	1166	1166	1166	1.65	231	19.81	110	9.43
91	NFIC_HUMAN.H11MO.0.A	CYTGGCHBYMWGCCARG	2.86e-13	3.07e-10	1.24e-07	1076	1166	1166	1166	9.78	172	14.75	67	5.75
92	SOX2_HUMAN.H11MO.0.A	BBCCTTTGTYYYB	3.74e-13	4.21e-10	1.69e-07	1124	1166	1166	1166	1.91	483	41.42	318	27.27
93	IRF7_HUMAN.H11MO.0.C	GAAASYGAAA	4.63e-13	4.35e-10	1.75e-07	938	1166	1166	1166	2.42	350	30.02	203	17.41
94	FOXM1_HUMAN.H11MO.0.A	TGTTTRCTYWKB	4.9e-13	4.39e-10	1.76e-07	896	1166	1166	1166	3.5	229	19.64	108	9.26
95	ZFP28_HUMAN.H11MO.0.C	TTCTATTTCTTCTTGWGTCA	1.69e-12	4.65e-10	1.87e-07	276	1166	1166	1166	1.38	191	16.38	83	7.12
96	GATA3_HUMAN.H11MO.0.A	RVAGATAAVAD	4.97e-13	4.95e-10	1.99e-07	997	1166	1166	1166	3	288	24.7	153	13.12
97	KLF9_HUMAN.H11MO.0.C	GRRGKGGGCGTGGCC	2.36e-12	9.73e-10	3.91e-07	413	1166	1166	1166	1.13	263	22.56	137	11.75
98	PAX5_HUMAN.H11MO.0.A	SCSKGGGCARCVRAGCGWGAC	3.6e-12	1.33e-09	5.36e-07	370	1166	1166	1166	27.7	60	5.15	7	0.6
99	IRF4_HUMAN.H11MO.0.A	RAAWGRGGAASTGAAASY	3.28e-12	1.52e-09	6.09e-07	462	1166	1166	1166	1.16	290	24.87	159	13.64
100	SMCA1_HUMAN.H11MO.0.C	CMARGAAGMATD	1.36e-12	1.61e-09	6.49e-07	1186	1166	1166	1166	1.63	518	44.43	354	30.36
101	SRBP2_HUMAN.H11MO.0.B	VSGTGGGGWGABG	1.79e-12	2.45e-09	9.86e-07	1373	1166	1166	1166	2.26	432	37.05	277	23.76
102	NFE2_HUMAN.H11MO.0.A	VVRTGACTCAGCA	1.05e-11	3.98e-09	1.6e-06	378	1166	1166	1166	1.77	182	15.61	80	6.86
103	NFAC2_HUMAN.H11MO.0.B	TGGAAAAWY	4.06e-12	4.18e-09	1.68e-06	1029	1166	1166	1166	2.17	427	36.62	275	23.58
104	STAT3_HUMAN.H11MO.0.A	SAYTTCCMRGAA	5.97e-12	4.25e-09	1.71e-06	712	1166	1166	1166	1.18	396	33.96	249	21.36
105	NFIA_HUMAN.H11MO.0.C	TTGGCHNRNWGCCAR	7.1e-12	6.25e-09	2.51e-06	880	1166	1166	1166	7.29	100	8.58	27	2.32
106	NF2L2_HUMAN.H11MO.0.A	WWYTGCTGAGTCAT	3.8e-11	6.8e-09	2.73e-06	179	1166	1166	1166	1.56	112	9.61	36	3.09
107	FOXJ2_HUMAN.H11MO.0.C	TGTTTRTTTW	2.64e-11	1.25e-08	5.02e-06	472	1166	1166	1166	2.85	222	19.04	111	9.52
108	TBX3_HUMAN.H11MO.0.C	DRAGGTGBSAR	8.97e-12	1.28e-08	5.14e-06	1426	1166	1166	1166	1.27	678	58.15	515	44.17
109	IKZF1_HUMAN.H11MO.0.C	BTGGGARR	8.8e-12	1.34e-08	5.4e-06	1527	1166	1166	1166	1.17	776	66.55	616	52.83
110	NFAC4_HUMAN.H11MO.0.C	DGGAAAAYTW	1.52e-11	1.71e-08	6.86e-06	1123	1166	1166	1166	1.7	501	42.97	346	29.67
111	FOXA1_HUMAN.H11MO.0.A	TGTTTACWYWGB	5.31e-11	2.69e-08	1.08e-05	507	1166	1166	1166	1.1	306	26.24	179	15.35
112	OSR2_HUMAN.H11MO.0.C	GBYSCWGCTNCTGYDG	3.35e-11	2.97e-08	1.2e-05	889	1166	1166	1166	3.48	241	20.67	126	10.81
113	STA5A_HUMAN.H11MO.0.A	TTCYRRGAAR	5.46e-11	3.07e-08	1.23e-05	562	1166	1166	1166	1.11	330	28.3	199	17.07
114	PTF1A_HUMAN.H11MO.0.B	SCAGCTGBYBBYBYYCHC	1.14e-10	9.74e-08	3.92e-05	853	1166	1166	1166	1.91	357	30.62	224	19.21
115	FOXA2_HUMAN.H11MO.0.A	TGTTTACWYWGB	2.96e-10	1.36e-07	5.47e-05	459	1166	1166	1166	1.23	266	22.81	151	12.95
116	MAF_HUMAN.H11MO.0.A	VAAWBTGCTGASTHWGCMD	1.96e-10	1.5e-07	6.02e-05	764	1166	1166	1166	1.62	334	28.64	206	17.67
117	STAT1_HUMAN.H11MO.0.A	YCCVTTTCCHGGAAAWCHC	5.6e-10	2.25e-07	9.06e-05	403	1166	1166	1166	1.29	235	20.15	128	10.98
118	Z324A_HUMAN.H11MO.0.C	KVTCAAACCATCCTTKSCTKSCW	3.48e-10	2.7e-07	0.000109	776	1166	1166	1166	1.15	458	39.28	317	27.19
119	BACH2_HUMAN.H11MO.0.A	TGCTGAGTCAB	6.34e-10	3.26e-07	0.000131	515	1166	1166	1166	16.6	56	4.8	9	0.77
120	COT1_HUMAN.H11MO.0.C	GRGGKSARAGGTCAGGG	3.42e-10	3.74e-07	0.00015	1095	1166	1166	1166	1.42	545	46.74	398	34.13
121	RUNX1_HUMAN.H11MO.0.A	BYTGTGGTTWB	6.09e-10	3.75e-07	0.000151	616	1166	1166	1166	1.56	287	24.61	170	14.58
122	BHA15_HUMAN.H11MO.0.B	SSAGCAGCTGG	6.89e-10	4.37e-07	0.000176	634	1166	1166	1166	1.48	319	27.36	197	16.9
123	GABPA_HUMAN.H11MO.0.A	GVVRCCGGAAGTGV	1.89e-09	7.48e-07	0.000301	396	1166	1166	1166	1.03	250	21.44	143	12.26
124	MXI1_HUMAN.H11MO.0.A	VCACGTGGSNGSBGS	1.83e-09	9.88e-07	0.000397	539	1166	1166	1166	2.04	191	16.38	97	8.32
125	MAFF_HUMAN.H11MO.0.B	TGCTGASTCAGCABTTTT	1.48e-09	1.01e-06	0.000407	685	1166	1166	1166	1.09	406	34.82	275	23.58
126	LEF1_HUMAN.H11MO.0.A	BCCTTTSWWNTBYH	1.73e-09	2.66e-06	0.00107	1542	1166	1166	1166	2.38	508	43.57	369	31.65
127	ATF2_HUMAN.H11MO.0.B	RRTGABGTCAY	7.18e-09	3.3e-06	0.00133	459	1166	1166	1166	1.26	248	21.27	145	12.44
128	RUNX3_HUMAN.H11MO.0.A	BYTGTGGTTW	5.86e-09	3.43e-06	0.00138	585	1166	1166	1166	5.36	125	10.72	52	4.46
129	BACH1_HUMAN.H11MO.0.A	TGCTGAGTCABSS	6.79e-09	3.73e-06	0.0015	550	1166	1166	1166	1.7	242	20.75	140	12.01
130	MYOG_HUMAN.H11MO.0.B	CHSCAGCTGYYYB	1.05e-08	5.17e-06	0.00208	491	1166	1166	1166	6.74	145	12.44	67	5.75
131	ZN768_HUMAN.H11MO.0.C	GAGGCHCAGAGAGGTTAAGT	3.23e-08	6.19e-06	0.00249	192	1166	1166	1166	1.27	132	11.32	60	5.15
132	ELK1_HUMAN.H11MO.0.B	RCCGGAAGTGV	2.05e-08	6.98e-06	0.00281	340	1166	1166	1166	1.02	217	18.61	123	10.55
133	SPIB_HUMAN.H11MO.0.A	RRAAAGAGGAAGTGARA	2.73e-08	9e-06	0.00362	330	1166	1166	1166	1.1	211	18.1	119	10.21
134	STA5B_HUMAN.H11MO.0.A	YTTCYKRGAAAY	1.52e-08	1.06e-05	0.00425	694	1166	1166	1166	1.02	408	34.99	285	24.44
135	BMAL1_HUMAN.H11MO.0.A	KSCACGTGHSY	3.23e-08	1.15e-05	0.00462	356	1166	1166	1166	2.08	132	11.32	60	5.15
136	ITF2_HUMAN.H11MO.0.C	DGCAGSTGKS	1.05e-08	1.29e-05	0.00518	1232	1166	1166	1166	1.56	506	43.4	374	32.08
137	REL_HUMAN.H11MO.0.B	DRWRGGGRAATKCCA	1.67e-08	1.6e-05	0.00644	957	1166	1166	1166	1.04	544	46.66	412	35.33
138	MAX_HUMAN.H11MO.0.A	VRGCACGTGG	4.01e-08	1.72e-05	0.00691	428	1166	1166	1166	1.78	167	14.32	86	7.38
139	ZN322_HUMAN.H11MO.0.B	GWGCCTGSTACWSWGCCTGR	7.14e-08	2.54e-05	0.0102	356	1166	1166	1166	1.25	209	17.92	120	10.29
140	PEBB_HUMAN.H11MO.0.C	TYTGTGGTYWB	3.34e-08	2.55e-05	0.0103	764	1166	1166	1166	7.31	101	8.66	39	3.34
141	MYCN_HUMAN.H11MO.0.A	RGCCACGTGSDS	8.35e-08	2.72e-05	0.0109	326	1166	1166	1166	5.12	59	5.06	15	1.29
142	MZF1_HUMAN.H11MO.0.B	RRDRGGGAWTKRR	5.65e-08	7.13e-05	0.0286	1262	1166	1166	1166	8.79	119	10.21	52	4.46
143	NFAC3_HUMAN.H11MO.0.B	TGGAAAAHY	8.19e-08	7.26e-05	0.0292	887	1166	1166	1166	1.07	494	42.37	371	31.82
144	PO2F1_HUMAN.H11MO.0.C	AWKBRWATGSAAWYAW	1.41e-07	8.75e-05	0.0352	621	1166	1166	1166	4.04	143	12.26	71	6.09
145	BCL6_HUMAN.H11MO.0.A	YKCTTTCYAGGAA	1.14e-07	9.68e-05	0.0389	846	1166	1166	1166	1.57	364	31.22	253	21.7
146	HTF4_HUMAN.H11MO.0.A	DSCAGSTGKG	1.05e-07	0.000112	0.0451	1067	1166	1166	1166	3.1	284	24.36	183	15.69
147	NDF2_HUMAN.H11MO.0.B	RRCAGATGG	1.69e-07	0.000134	0.0538	792	1166	1166	1166	1.21	410	35.16	296	25.39
148	FOXA3_HUMAN.H11MO.0.B	CHTGTTTACWTWG	3.21e-07	0.000166	0.0667	517	1166	1166	1166	2.24	200	17.15	117	10.03
149	HIF1A_HUMAN.H11MO.0.C	GDACGTGM	5.72e-07	0.000166	0.0669	291	1166	1166	1166	1.05	174	14.92	98	8.4
150	HNF1B_HUMAN.H11MO.0.A	DGTTAATRATTAACH	6.93e-07	0.000167	0.0672	241	1166	1166	1166	1.46	130	11.15	65	5.57
151	STAT4_HUMAN.H11MO.0.A	YTTCYYRGMAV	2.03e-07	0.0002	0.0802	983	1166	1166	1166	4.35	219	18.78	131	11.23
152	FOXO4_HUMAN.H11MO.0.C	TTGTTTAYK	3.78e-07	0.000213	0.0857	564	1166	1166	1166	4.89	152	13.04	80	6.86
153	MYC_HUMAN.H11MO.0.A	RCCACGTGCTB	6.7e-07	0.000214	0.0859	319	1166	1166	1166	1.3	176	15.09	100	8.58
154	NANOG_HUMAN.H11MO.0.A	BYYWTTGWNATGCAAAT	3.5e-07	0.000241	0.097	689	1166	1166	1166	1.07	398	34.13	288	24.7
155	SRF_HUMAN.H11MO.0.A	TTKCCWTWTWTGGBCWTD	1.17e-06	0.000285	0.114	244	1166	1166	1166	15.9	36	3.09	6	0.51
156	RARA_HUMAN.H11MO.0.A	GGRRGRTSMRRAGKTCAAGG	4.65e-07	0.000327	0.131	703	1166	1166	1166	8.92	106	9.09	47	4.03
157	CLOCK_HUMAN.H11MO.0.C	CWGHCACGTGMVVM	5.74e-07	0.000455	0.183	793	1166	1166	1166	2.1	136	11.66	69	5.92
158	PRGR_HUMAN.H11MO.0.A	RGAACATTYTGTTCTB	1.03e-06	0.000507	0.204	493	1166	1166	1166	1.15	276	23.67	184	15.78
159	BHE40_HUMAN.H11MO.0.A	DGCACGTGAS	2.48e-06	0.000569	0.229	229	1166	1166	1166	1.6	97	8.32	44	3.77
160	HXB13_HUMAN.H11MO.0.A	TTTTATDGSH	9.22e-07	0.000584	0.235	633	1166	1166	1166	1.44	303	25.99	207	17.75
161	OLIG2_HUMAN.H11MO.0.B	CCAKCTGYTYYYYWBCHB	6.25e-07	0.000618	0.248	988	1166	1166	1166	5.28	166	14.24	92	7.89
162	RXRB_HUMAN.H11MO.0.C	TSAGGTCASR	8.4e-07	0.000659	0.265	785	1166	1166	1166	3.24	165	14.15	92	7.89
163	HSF1_HUMAN.H11MO.0.A	BRGAANSTTCYRGAA	2.47e-06	0.000736	0.296	298	1166	1166	1166	2.54	122	10.46	62	5.32
164	ZN418_HUMAN.H11MO.0.C	TGCTTYTRGCYTCTKVY	1.2e-06	0.000794	0.319	659	1166	1166	1166	1.07	377	32.33	274	23.5
165	TF65_HUMAN.H11MO.0.A	HWGGGRATTTCCMV	2.01e-06	0.00103	0.414	512	1166	1166	1166	1.73	238	20.41	154	13.21
166	ARNT_HUMAN.H11MO.0.B	STACGTGMC	4.91e-06	0.00105	0.42	213	1166	1166	1166	1.03	137	11.75	75	6.43
167	TFE2_HUMAN.H11MO.0.A	SMCAGCTGCWB	1.78e-06	0.0012	0.482	673	1166	1166	1166	5.62	156	13.38	87	7.46
168	TBP_HUMAN.H11MO.0.A	MTATAAAARS	1.96e-06	0.00133	0.533	678	1166	1166	1166	1.02	389	33.36	287	24.61
169	HSF2_HUMAN.H11MO.0.A	VGAABRTTCTAGAA	2.39e-06	0.00135	0.541	565	1166	1166	1166	1.14	300	25.73	208	17.84
170	ZN554_HUMAN.H11MO.0.C	GCWGAGYCANGTRGDKKRCT	2.25e-06	0.00147	0.592	654	1166	1166	1166	11.3	59	5.06	19	1.63
171	ELK4_HUMAN.H11MO.0.A	SVCCGGAAGTGV	5.51e-06	0.00169	0.678	306	1166	1166	1166	1.04	187	16.04	115	9.86
172	FOXH1_HUMAN.H11MO.0.A	TGTGGATTS	3.3e-06	0.002	0.805	608	1166	1166	1166	1.29	294	25.21	204	17.5
173	CREM_HUMAN.H11MO.0.C	CRVTGACGTCA	8.81e-06	0.00226	0.91	257	1166	1166	1166	1.37	135	11.58	75	6.43
174	ZNF76_HUMAN.H11MO.0.C	RRKGCMTKCTGGGARWTGTAGT	8.68e-06	0.00265	1.07	306	1166	1166	1166	1.54	158	13.55	93	7.98
175	ZN335_HUMAN.H11MO.0.A	RGCTGYCYNBVSCKMTGCCTGW	7.72e-06	0.00303	1.22	393	1166	1166	1166	3.34	113	9.69	58	4.97
176	HXA10_HUMAN.H11MO.0.C	KATRRTTTATGW	7.58e-06	0.00306	1.23	404	1166	1166	1166	1.06	236	20.24	157	13.46
177	SOX3_HUMAN.H11MO.0.B	BCCWTTGTBYB	3.63e-06	0.00322	1.29	889	1166	1166	1166	1.72	374	32.08	276	23.67
178	FOXC1_HUMAN.H11MO.0.C	CDWTGTTTACTTWRG	2.1e-05	0.00343	1.38	164	1166	1166	1166	1.38	99	8.49	50	4.29
179	PIT1_HUMAN.H11MO.0.C	YTMATGAATATWY	5.62e-06	0.00369	1.48	658	1166	1166	1166	1.28	331	28.39	239	20.5
180	ZNF85_HUMAN.H11MO.0.C	AWAGAARWCTGMWGKAATCT	1.18e-05	0.00378	1.52	321	1166	1166	1166	1.39	173	14.84	106	9.09
181	NKX61_HUMAN.H11MO.0.B	GAYWAATKRSHWWTTAATK	6.59e-06	0.00417	1.68	634	1166	1166	1166	1.57	292	25.04	205	17.58
182	ZBT18_HUMAN.H11MO.0.C	KCCAGMTGTKB	6.99e-06	0.00521	2.09	747	1166	1166	1166	1.73	294	25.21	207	17.75
183	ZEB1_HUMAN.H11MO.0.A	BVCAGGTGWG	5.72e-06	0.0058	2.33	1018	1166	1166	1166	1.01	561	48.11	455	39.02
184	ZN350_HUMAN.H11MO.0.C	CAGYYYTTTTATDWCCHR	6.77e-06	0.00719	2.89	1066	1166	1166	1166	2.73	329	28.22	238	20.41
185	SIX1_HUMAN.H11MO.0.A	TGWAAYHTGAKMCY	1.96e-05	0.00771	3.1	395	1166	1166	1166	1.12	226	19.38	152	13.04
186	SMAD2_HUMAN.H11MO.0.A	TGTCTGNCWCCT	7.79e-06	0.00793	3.19	1021	1166	1166	1166	1.22	490	42.02	388	33.28
187	SIX2_HUMAN.H11MO.0.A	KGAAAYHTGAKMC	1.28e-05	0.0083	3.34	653	1166	1166	1166	2.16	203	17.41	131	11.23
188	EPAS1_HUMAN.H11MO.0.B	VTACGTGMC	4.81e-05	0.00923	3.71	193	1166	1166	1166	1.02	120	10.29	68	5.83
189	HNF1A_HUMAN.H11MO.0.C	DGTTAATKATTAACH	2.4e-05	0.0101	4.05	422	1166	1166	1166	1.07	246	21.1	170	14.58
190	MAFK_HUMAN.H11MO.0.A	RAWWHTGCTGASTCAGCA	8.74e-05	0.0141	5.65	162	1166	1166	1166	1.22	101	8.66	55	4.72
191	IRF9_HUMAN.H11MO.0.C	GAAAGCGAAAYT	9.77e-05	0.0167	6.7	172	1166	1166	1166	1.43	90	7.72	47	4.03
192	USF1_HUMAN.H11MO.0.A	RGTCACGTGRBS	0.000177	0.0191	7.67	109	1166	1166	1166	3.9	39	3.34	13	1.11
193	ZSC31_HUMAN.H11MO.0.C	RGCAGCAGGGCARTTAKR	3.77e-05	0.0222	8.94	596	1166	1166	1166	1.1	337	28.9	253	21.7

## Sheet: CAMTA1.ChIP.AME.Enrichment
rank	motif_ID	consensus	p-value	adj_p-value	E-value	tests	FASTA_max	pos	neg	PWM_min	TP	%TP	FP	%FP
1	SP3_HUMAN.H11MO.0.B	SGVVGGGGGCGGGGCBRGSS	5.2e-23	2.91e-20	1.17e-17	560	156	156	1092	3.66	74	47.44	131	12
2	SP2_HUMAN.H11MO.0.A	GGSSVGGGGGCGGGGCCDGSGS	1.49e-20	7.63e-18	3.07e-15	513	156	156	1092	4.51	63	40.38	102	9.34
3	EGR2_HUMAN.H11MO.0.A	GRGRRKGWGKGGGHGGRG	4.29e-20	1.53e-17	6.15e-15	357	156	156	1092	1.32	89	57.05	224	20.51
4	KLF1_HUMAN.H11MO.0.A	DGGGYGKGGCYGGG	4.02e-18	1.36e-15	5.45e-13	337	156	156	1092	1.22	86	55.13	226	20.7
5	KLF6_HUMAN.H11MO.0.A	GSRRGGGHGGGGMHGGGRV	1.24e-17	5.97e-15	2.4e-12	483	156	156	1092	1.75	89	57.05	247	22.62
6	KLF3_HUMAN.H11MO.0.B	GGRGVDGGGCGGGGCYGGG	1.76e-17	6.83e-15	2.75e-12	388	156	156	1092	1.28	88	56.41	243	22.25
7	SP4_HUMAN.H11MO.0.A	SRGVARGRGGCGGRGCHDRR	2.45e-17	1.08e-14	4.34e-12	440	156	156	1092	1.09	102	65.38	327	29.95
8	SP1_HUMAN.H11MO.0.A	VGGGGGCGGGGCCKGGGGGGGG	2.36e-16	4.13e-14	1.66e-11	175	156	156	1092	2.2	51	32.69	82	7.51
9	KLF5_HUMAN.H11MO.0.A	WGGGTGKGGCDGGG	2.74e-16	9.63e-14	3.87e-11	352	156	156	1092	1.13	86	55.13	244	22.34
10	EGR1_HUMAN.H11MO.0.A	VDRDGCGKGGGYGGRRR	2.71e-16	1e-13	4.03e-11	370	156	156	1092	1.04	92	58.97	278	25.46
11	KLF15_HUMAN.H11MO.0.A	RGGGMGGRGVDGGGGGRGG	5.13e-16	1.52e-13	6.12e-11	297	156	156	1092	1.43	73	46.79	179	16.39
12	PATZ1_HUMAN.H11MO.0.C	GGGGMGGGGGMKGGRRVGGVRG	7.61e-16	3.62e-13	1.46e-10	476	156	156	1092	3.3	67	42.95	152	13.92
13	ZN281_HUMAN.H11MO.0.A	RGGWGGGGGAGGGGV	1.78e-15	4.53e-13	1.82e-10	255	156	156	1092	1.09	72	46.15	179	16.39
14	E2F7_HUMAN.H11MO.0.B	GDGGCGGGAARDR	2.99e-15	1.33e-12	5.34e-10	444	156	156	1092	1.11	97	62.18	320	29.3
15	KLF12_HUMAN.H11MO.0.C	VGGGGCGGGGC	7.32e-15	2.43e-12	9.76e-10	332	156	156	1092	2.56	61	39.1	133	12.18
16	ZBT17_HUMAN.H11MO.0.A	SRRGGWGGGGGAGGGGMRR	5.87e-15	2.64e-12	1.06e-09	450	156	156	1092	2.97	70	44.87	174	15.93
17	ZN467_HUMAN.H11MO.0.C	GGGGAGGGGRRGGRGRRGGRRR	2.27e-14	5.54e-12	2.23e-09	244	156	156	1092	4.49	49	31.41	87	7.97
18	WT1_HUMAN.H11MO.0.C	RGGVGGGGGAGGRGGVGGRG	2.42e-14	7.42e-12	2.98e-09	306	156	156	1092	1.96	68	43.59	170	15.57
19	SALL4_HUMAN.H11MO.0.B	GSDGGGWGGG	2.02e-14	1.25e-11	5.01e-09	618	156	156	1092	2.49	72	46.15	189	17.31
20	ZN263_HUMAN.H11MO.0.A	GGGAGGAGGRRGRGGRGGRR	1.5e-12	3.97e-10	1.6e-07	264	156	156	1092	2.37	53	33.97	117	10.71
21	MAZ_HUMAN.H11MO.0.A	GGGGGAGGGGGDGRGRRRGRRG	1.21e-12	5e-10	2.01e-07	415	156	156	1092	1.78	80	51.28	251	22.99
22	KLF4_HUMAN.H11MO.0.A	WGGGYGKGGC	1.83e-12	5.05e-10	2.03e-07	276	156	156	1092	1.09	70	44.87	199	18.22
23	TAF1_HUMAN.H11MO.0.A	RARRWGGCGGMGGMGR	3.28e-12	1.42e-09	5.73e-07	435	156	156	1092	1.07	93	59.62	334	30.59
24	VEZF1_HUMAN.H11MO.0.C	GGRRRRGRRGGAGGGGGRGRRR	4.74e-12	2.01e-09	8.09e-07	425	156	156	1092	3.66	63	40.38	168	15.38
25	KLF9_HUMAN.H11MO.0.C	GRRGKGGGCGTGGCC	1.48e-10	2.67e-08	1.07e-05	180	156	156	1092	1.06	51	32.69	126	11.54
26	ZN341_HUMAN.H11MO.0.C	GRGGRRRRGGRGRRGGAASAGC	4.88e-10	2.11e-07	8.47e-05	432	156	156	1092	2.7	60	38.46	175	16.03
27	E2F4_HUMAN.H11MO.0.A	SRGGGCGGGAARD	1.18e-09	4.29e-07	0.000172	364	156	156	1092	1.02	79	50.64	285	26.1
28	BC11A_HUMAN.H11MO.0.A	RAAAGAGGAAGTGARAV	2.23e-09	8.24e-07	0.000331	370	156	156	1092	1.5	73	46.79	254	23.26
29	ETV5_HUMAN.H11MO.0.C	RRRSAGGAARDGRV	2.07e-09	1.02e-06	0.000409	493	156	156	1092	2.49	65	41.67	209	19.14
30	ELF5_HUMAN.H11MO.0.A	VGRASSAGGAAGTRV	1.68e-08	3.78e-06	0.00152	225	156	156	1092	1.3	51	32.69	148	13.55
31	ETS2_HUMAN.H11MO.0.B	RDVRGGAARVRRR	1.32e-08	6.74e-06	0.00271	512	156	156	1092	2.99	65	41.67	220	20.15
32	FLI1_HUMAN.H11MO.0.A	SRRGGMAGGAAGGRRRGR	2.92e-08	7.86e-06	0.00316	269	156	156	1092	1.11	61	39.1	203	18.59
33	ERG_HUMAN.H11MO.0.A	RRRSAGGAAGYGG	4.33e-08	1.27e-05	0.0051	293	156	156	1092	1.26	60	38.46	200	18.32
34	FEV_HUMAN.H11MO.0.B	GCVGGAAGYG	2.72e-08	1.9e-05	0.00765	701	156	156	1092	2.2	56	35.9	176	16.12
35	TYY1_HUMAN.H11MO.0.A	CAARATGGCGGC	5.04e-07	3.28e-05	0.0132	65	156	156	1092	11.8	12	7.69	8	0.73
36	RXRA_HUMAN.H11MO.0.A	VRGDVRGNVARAGGTCARRG	1.03e-07	4.46e-05	0.0179	433	156	156	1092	1.34	77	49.36	304	27.84
37	MZF1_HUMAN.H11MO.0.B	RRDRGGGAWTKRR	1.19e-07	4.52e-05	0.0182	381	156	156	1092	1.24	71	45.51	269	24.63
38	SPI1_HUMAN.H11MO.0.A	RRAAAGAGGAAGTGRVD	4.99e-07	4.89e-05	0.0197	98	156	156	1092	4.11	22	14.1	37	3.39
39	ELF3_HUMAN.H11MO.0.A	RAABVAGGAAGTRR	5.21e-07	8.59e-05	0.0345	165	156	156	1092	1.06	42	26.92	122	11.17
40	ETS1_HUMAN.H11MO.0.A	RRRCMGGAAGTGG	4.14e-07	0.000107	0.0429	258	156	156	1092	1.43	51	32.69	166	15.2
41	GATA3_HUMAN.H11MO.0.A	RVAGATAAVAD	7.41e-07	0.000193	0.0774	260	156	156	1092	1.06	57	36.54	202	18.5
42	ELK4_HUMAN.H11MO.0.A	SVCCGGAAGTGV	1.1e-06	0.000211	0.085	192	156	156	1092	4.54	23	14.74	43	3.94
43	GABPA_HUMAN.H11MO.0.A	GVVRCCGGAAGTGV	1.45e-06	0.000288	0.116	199	156	156	1092	1.45	39	25	113	10.35
44	NRF1_HUMAN.H11MO.0.A	CWSTGCGCATGCGCRDS	3.29e-06	0.000312	0.125	95	156	156	1092	1.09	28	17.95	67	6.14
45	ELF2_HUMAN.H11MO.0.C	RAVCCGGAAGTGR	1.52e-06	0.000376	0.151	248	156	156	1092	3.19	29	18.59	68	6.23
46	CREB1_HUMAN.H11MO.0.A	NRRTGACGTMA	2.83e-06	0.000396	0.159	140	156	156	1092	1.66	25	16.03	54	4.95
47	ETV1_HUMAN.H11MO.0.A	SRCCGGAAGYG	1.61e-06	0.000441	0.177	274	156	156	1092	1.28	52	33.33	180	16.48
48	GATA2_HUMAN.H11MO.0.A	STGBNNNNNDVAGATAAGR	4.44e-06	0.000546	0.22	123	156	156	1092	1.22	32	20.51	86	7.88
49	ELK1_HUMAN.H11MO.0.B	RCCGGAAGTGV	3.44e-06	0.000594	0.239	173	156	156	1092	4.05	22	14.1	43	3.94
50	SOX3_HUMAN.H11MO.0.B	BCCWTTGTBYB	1.95e-06	0.000607	0.244	311	156	156	1092	2.85	48	30.77	160	14.65
51	NFKB1_HUMAN.H11MO.0.A	AGGGAAAK	1.24e-06	0.00061	0.245	492	156	156	1092	1.13	85	54.49	375	34.34
52	SOX4_HUMAN.H11MO.0.B	BYCTTTGTYYYB	2.19e-06	0.000785	0.315	358	156	156	1092	5.1	42	26.92	130	11.9
53	ETV2_HUMAN.H11MO.0.B	RRARRCAGGAARYRGS	5.48e-06	0.000871	0.35	159	156	156	1092	2.08	30	19.23	78	7.14
54	TFDP1_HUMAN.H11MO.0.C	RRRRGGCGGGAARN	2.71e-06	0.000888	0.357	328	156	156	1092	1.4	53	33.97	189	17.31
55	ETV4_HUMAN.H11MO.0.B	VRCAGGAARBR	2.1e-06	0.00091	0.366	434	156	156	1092	4.61	39	25	115	10.53
56	FOXJ2_HUMAN.H11MO.0.C	TGTTTRTTTW	1.22e-05	0.00123	0.495	101	156	156	1092	113	7	4.49	2	0.18
57	MYCN_HUMAN.H11MO.0.A	RGCCACGTGSDS	1.03e-05	0.00162	0.652	157	156	156	1092	2.04	24	15.38	55	5.04
58	ATF1_HUMAN.H11MO.0.B	HRRTGACGYMA	9.53e-06	0.00194	0.781	204	156	156	1092	1.16	42	26.92	139	12.73
59	PRDM6_HUMAN.H11MO.0.C	RRRARGAAAAAAA	6.85e-06	0.00222	0.892	324	156	156	1092	1.1	64	41.03	259	23.72
60	ELF1_HUMAN.H11MO.0.A	VRACCCGGAAGTGS	1.18e-05	0.00232	0.932	196	156	156	1092	7.06	15	9.62	22	2.01
61	GATA1_HUMAN.H11MO.0.A	STGBNNNDNVSAGATAAGV	2.07e-05	0.00257	1.03	124	156	156	1092	1.4	29	18.59	80	7.33
62	E2F6_HUMAN.H11MO.0.A	DGGGCGGGARRVR	6.13e-06	0.00259	1.04	424	156	156	1092	1.45	66	42.31	270	24.73
63	SOX2_HUMAN.H11MO.0.A	BBCCTTTGTYYYB	8.24e-06	0.00294	1.18	357	156	156	1092	3.12	51	32.69	186	17.03
64	MEF2C_HUMAN.H11MO.0.A	DKCTATTTTTRGM	2.07e-05	0.00302	1.21	146	156	156	1092	2.25	29	18.59	80	7.33
65	MEF2A_HUMAN.H11MO.0.A	DKCTATTTTTRGM	2.2e-05	0.00308	1.24	140	156	156	1092	1.2	34	21.79	104	9.52
66	SPIB_HUMAN.H11MO.0.A	RRAAAGAGGAAGTGARA	4.95e-05	0.00316	1.27	64	156	156	1092	1.58	18	11.54	37	3.39
67	IRF3_HUMAN.H11MO.0.B	RAAARGGAAAVDGAAASDGA	1.47e-05	0.0032	1.29	218	156	156	1092	1.46	46	29.49	163	14.93
68	SUH_HUMAN.H11MO.0.A	VSYSTGGGAAV	8.23e-06	0.00386	1.55	470	156	156	1092	1.21	75	48.08	328	30.04
69	AIRE_HUMAN.H11MO.0.C	HTTGGWWWWAWTGGDTWH	2.3e-05	0.00477	1.92	208	156	156	1092	10.4	22	14.1	50	4.58
70	ZN394_HUMAN.H11MO.0.C	NRARWRGAAWNGAMWGRAAK	1.6e-05	0.00484	1.94	304	156	156	1092	1.52	57	36.54	225	20.6
71	NKX61_HUMAN.H11MO.0.B	GAYWAATKRSHWWTTAATK	3.33e-05	0.00571	2.29	172	156	156	1092	10.3	24	15.38	60	5.49
72	ATF2_HUMAN.H11MO.0.B	RRTGABGTCAY	3.73e-05	0.00574	2.31	154	156	156	1092	15.1	8	5.13	5	0.46
73	IRF4_HUMAN.H11MO.0.A	RAAWGRGGAASTGAAASY	4.63e-05	0.00586	2.36	127	156	156	1092	13.8	13	8.33	19	1.74
74	FOXQ1_HUMAN.H11MO.0.C	HATTGTTTATTT	0.000236	0.00588	2.37	25	156	156	1092	82.8	4	2.56	0	0
75	ZFP42_HUMAN.H11MO.0.A	GGCMGCCATTTT	4.24e-05	0.00811	3.26	192	156	156	1092	1.67	33	21.15	103	9.43
76	TBX21_HUMAN.H11MO.0.A	GDGDRGGTGTGRV	1.7e-05	0.00825	3.32	489	156	156	1092	1.18	78	50	354	32.42
77	RXRG_HUMAN.H11MO.0.B	GGTCAAAGGTCAH	0.000212	0.00845	3.4	40	156	156	1092	110	6	3.85	3	0.27
78	FOXP1_HUMAN.H11MO.0.A	TBTGTTTMY	2.64e-05	0.00864	3.47	329	156	156	1092	3.53	37	23.72	120	10.99
79	STAT2_HUMAN.H11MO.0.A	RRGRAAAHGAAACTGAAAV	7.3e-05	0.00865	3.48	119	156	156	1092	86.5	10	6.41	11	1.01
80	FOSL2_HUMAN.H11MO.0.A	NDRTGAGTCAYH	0.000155	0.0105	4.23	68	156	156	1092	153	5	3.21	1	0.09
81	FOSL1_HUMAN.H11MO.0.A	KRVTGAGTCAYH	0.000155	0.0108	4.35	70	156	156	1092	187	5	3.21	1	0.09
82	SOX17_HUMAN.H11MO.0.C	SCCATTGTKBY	3.01e-05	0.0109	4.39	365	156	156	1092	1.34	60	38.46	248	22.71
83	PPARG_HUMAN.H11MO.0.A	MWSTRGGKSARAGGKCA	4.13e-05	0.0111	4.44	269	156	156	1092	1.87	42	26.92	149	13.64
84	PPARA_HUMAN.H11MO.0.B	AWSTRGGKSAAAGGTCA	4.52e-05	0.0113	4.53	251	156	156	1092	1.64	43	27.56	155	14.19
85	NFAC2_HUMAN.H11MO.0.B	TGGAAAAWY	4.56e-05	0.0122	4.91	270	156	156	1092	1.15	52	33.33	205	18.77
86	ZN770_HUMAN.H11MO.0.C	GGGAGGCYGAGGBRGGAGGATC	7.59e-05	0.0134	5.39	178	156	156	1092	1.37	37	23.72	127	11.63
87	NFAC4_HUMAN.H11MO.0.C	DGGAAAAYTW	4.7e-05	0.0143	5.75	306	156	156	1092	1.67	53	33.97	211	19.32
88	IRF8_HUMAN.H11MO.0.B	RAAARRGGAASTGAAASTDR	0.00014	0.0155	6.25	112	156	156	1092	1.5	27	17.31	81	7.42
89	RORG_HUMAN.H11MO.0.C	RRAASTRGGTCA	8.3e-05	0.0166	6.65	201	156	156	1092	5.6	17	10.9	35	3.21
90	NFAC1_HUMAN.H11MO.0.B	AWGGAAARWVWGAMW	4.7e-05	0.0174	6.98	373	156	156	1092	1.59	61	39.1	258	23.63
91	PO2F1_HUMAN.H11MO.0.C	AWKBRWATGSAAWYAW	9.34e-05	0.0175	7.03	189	156	156	1092	2.03	34	21.79	113	10.35
92	SRY_HUMAN.H11MO.0.B	YWTTGTTTH	5.98e-05	0.019	7.65	321	156	156	1092	72	9	5.77	8	0.73
93	JUND_HUMAN.H11MO.0.A	RRTGAGTCAYY	0.000155	0.0191	7.68	124	156	156	1092	178	5	3.21	1	0.09
94	HXB13_HUMAN.H11MO.0.A	TTTTATDGSY	9.68e-05	0.0195	7.82	203	156	156	1092	12.7	15	9.62	28	2.56
95	MEF2B_HUMAN.H11MO.0.A	DKKKCTATTTTTRG	0.00012	0.0239	9.6	202	156	156	1092	44.7	10	6.41	12	1.1
96	FOS_HUMAN.H11MO.0.A	VTGAGTCAB	0.000155	0.024	9.63	156	156	156	1092	84.5	5	3.21	1	0.09
97	EHF_HUMAN.H11MO.0.B	VWACSAGGAAGTDVS	0.000171	0.0246	9.87	145	156	156	1092	1.05	33	21.15	112	10.26
# AME (Analysis of Motif Enrichment): Version 5.0.5 compiled on Jul 15 2019 at 00:31:14
# The format of this file is described at http://meme-suite.org//doc/ame-output-format.html.
# ame --verbose 1 --oc . --scoring avg --method fisher --hit-lo-fraction 0.25 --evalue-report-threshold 10.0 --control --shuffle-- --kmer 2 camta1_chip_seq.fasta db/HUMAN/HOCOMOCOv11_core_HUMAN_mono_meme_format.meme
