# Supplementary material for: TAZ-CAMTA1 and YAP-TFE3 alter the TAZ/YAP transcriptome by recruiting the ATAC histone acetyltransferase complex
Source: eLife. 2021 Apr 29;10:e62857. doi: 10.7554/eLife.62857 (PMC8143797; doi:10.7554/eLife.62857)
Supplement: Figure 4—source data 2. [file elife-62857-fig4-data2.xlsx]

## Sheet: YAP5SA_ChIP_RNAseq_merged
	seqnames	start	end	width	strand	V5	geneId	ENSEMBL	baseMean	log2 Fold Change	padj	Gene
1	chr1	8964070	8964581	512	*	335	2023	ENSG00000074800	85505.7	0.789448	6.16451e-09	ENO1
2	chr1	15298307	15298697	391	*	86	23254	ENSG00000189337	2090.46	1.38791	2.24808e-51	KAZN
3	chr1	15664780	15665109	330	*	86	114827	ENSG00000142621	349.947	0.606338	9.70384e-05	FHAD1
4	chr1	16470691	16473814	3124	*	143	1969	ENSG00000142627	5020.24	1.62983	5.31429e-43	EPHA2
5	chr1	16500171	16500446	276	*	130	1969	ENSG00000142627	5020.24	1.62983	5.31429e-43	EPHA2
6	chr1	17516511	17516973	463	*	179	29943	ENSG00000142623	49.5811	3.96298	1.12897e-16	PADI1
7	chr1	19379010	19379343	334	*	133	23352	ENSG00000127481	15901.6	0.77168	4.75743e-20	UBR4
8	chr1	20091968	20092502	535	*	30	255104	ENSG00000162542	1573.63	0.874907	1.82701e-12	TMCO4
9	chr1	26218626	26219157	532	*	95	3925	ENSG00000117632	17626.6	0.685301	1.11669e-11	STMN1
10	chr1	26745568	26745877	310	*	20	79727	ENSG00000131914	640.034	2.37433	7.25149e-70	LIN28A
11	chr1	27319850	27320229	380	*	60	388610	ENSG00000253368	1601.23	1.38837	2.39927e-22	TRNP1
12	chr1	27325825	27326224	400	*	98	388610	ENSG00000253368	1601.23	1.38837	2.39927e-22	TRNP1
13	chr1	28764542	28764887	346	*	69	65979	ENSG00000204138	2601.1	0.200138	0.0132569	PHACTR4
14	chr1	29450908	29451362	455	*	342	399474	ENSG00000253304	55.7142	0.750408	0.0109623	TMEM200B
15	chr1	29598235	29598672	438	*	153	10076	ENSG00000060656	1753.9	0.823607	3.97395e-09	PTPRU
16	chr1	33564956	33565296	341	*	104	113451	ENSG00000142920	391	0.507447	0.0248677	AZIN2
17	chr1	43672425	43672985	561	*	229	10969	ENSG00000117395	5155.5	0.946285	1.40539e-22	EBNA1BP2
18	chr1	43938555	43938888	334	*	114	81888	ENSG00000178922	1853.67	1.6245	6.43362e-37	HYI
19	chr1	44287576	44288112	537	*	52	6487	ENSG00000126091	868.249	0.507867	6.67291e-09	ST3GAL3
20	chr1	48035652	48035948	297	*	123	2306	ENSG00000186564	276.81	-0.598117	1.98048e-05	FOXD2
21	chr1	53611742	53612084	343	*	76	6512	ENSG00000162383	15.2149	1.62188	0.00208274	SLC1A7
22	chr1	54789786	54790127	342	*	59	23648	ENSG00000157216	3859.24	-0.542268	6.46487e-06	SSBP3
23	chr1	59228823	59229084	262	*	153	3725	ENSG00000177606	2696.77	1.67789	8.72429e-18	JUN
24	chr1	64197014	64197317	304	*	45	4919	ENSG00000185483	803.221	-0.891253	1.72166e-09	ROR1
25	chr1	64386261	64386568	308	*	114	4919	ENSG00000185483	803.221	-0.891253	1.72166e-09	ROR1
26	chr1	85666871	85668161	1291	*	392	84144	ENSG00000097096	235.87	1.2919	1.35922e-07	SYDE2
27	chr1	86042753	86043047	295	*	77	23576	ENSG00000153904	3716.23	1.20409	5.88462e-18	DDAH1
28	chr1	86043944	86044422	479	*	69	23576	ENSG00000153904	3716.23	1.20409	5.88462e-18	DDAH1
29	chr1	86045969	86047024	1056	*	462	3491	ENSG00000142871	10596.6	4.16342	2.08508e-303	CCN1
30	chr1	86072754	86073248	495	*	69	3491	ENSG00000142871	10596.6	4.16342	2.08508e-303	CCN1
31	chr1	86078137	86078727	591	*	45	3491	ENSG00000142871	10596.6	4.16342	2.08508e-303	CCN1
32	chr1	92022749	92023151	403	*	37	8317	ENSG00000097046	1042.85	-1.01355	1.45516e-09	CDC7
33	chr1	92202283	92202618	336	*	45	7049	ENSG00000069702	1252.63	-0.764091	1.27192e-10	TGFBR3
34	chr1	94219904	94220360	457	*	60	8412	ENSG00000137936	3028.46	0.35349	0.00772067	BCAR3
35	chr1	94511228	94511545	318	*	76	24	ENSG00000198691	54.7431	1.02635	0.0248189	ABCA4
36	chr1	94701686	94701982	297	*	37	9411	ENSG00000137962	4982.78	0.443426	0.0400664	ARHGAP29
37	chr1	94791431	94791703	273	*	30	9411	ENSG00000137962	4982.78	0.443426	0.0400664	ARHGAP29
38	chr1	145092201	145092948	748	*	211	9554	ENSG00000265808	4612.53	0.398502	5.02853e-07	SEC22B
39	chr1	150533666	150534069	404	*	50	54507	ENSG00000143382	843.036	1.05453	3.3761e-13	ADAMTSL4
40	chr1	151167717	151168396	680	*	218	8394	ENSG00000143398	3765.17	0.923842	7.88524e-22	PIP5K1A
41	chr1	151960675	151961361	687	*	69	6281	ENSG00000197747	12016	1.44846	4.10141e-39	S100A10
42	chr1	152080915	152081601	687	*	60	7062	ENSG00000159450	60.1409	1.36475	0.000761904	TCHH
43	chr1	153936471	153936966	496	*	185	27173	ENSG00000143570	6731.34	0.304023	0.0338631	SLC39A1
44	chr1	154944978	154945721	744	*	114	6464	ENSG00000160691	17857.7	0.471748	3.66808e-05	SHC1
45	chr1	156866462	156866916	455	*	69	375033	ENSG00000187800	1120.15	1.90262	1.67897e-48	PEAR1
46	chr1	157989200	157989745	546	*	398	55243	ENSG00000183853	10728.7	0.646225	1.64111e-11	KIRREL1
47	chr1	202558413	202558703	291	*	111	4660	ENSG00000077157	1810.48	0.449403	3.32239e-07	PPP1R12B
48	chr1	205270625	205270897	273	*	46	81788	ENSG00000163545	210.064	1.35749	6.40601e-17	NUAK2
49	chr1	214578011	214578393	383	*	30	5784	ENSG00000152104	5617.29	0.751215	2.26117e-25	PTPN14
50	chr1	214725070	214725779	710	*	505	5784	ENSG00000152104	5617.29	0.751215	2.26117e-25	PTPN14
51	chr10	14116505	14116793	289	*	60	55691	ENSG00000151474	2369.14	-1.62059	2.96883e-66	FRMD4A
52	chr10	65027392	65027699	308	*	23	221037	ENSG00000171988	1264.15	-1.14754	8.55433e-06	JMJD1C
53	chr10	73526579	73526884	306	*	185	64115	ENSG00000107738	1076.14	1.23914	6.50067e-15	VSIR
54	chr10	88855004	88855272	269	*	30	54537	ENSG00000122376	793.25	-0.71926	4.96173e-05	SHLD2
55	chr10	92690523	92691144	622	*	115	27063	ENSG00000148677	2371.13	7.50811	9.12873e-69	ANKRD1
56	chr10	95048585	95049037	453	*	164	26509	ENSG00000138119	15695.7	1.567	6.04168e-36	MYOF
57	chr10	95218439	95218982	544	*	30	26509	ENSG00000138119	15695.7	1.567	6.04168e-36	MYOF
58	chr10	99334390	99334663	274	*	153	26287	ENSG00000165887	7.83918	4.45296	7.82808e-05	ANKRD2
59	chr10	99447240	99447501	262	*	52	60370	ENSG00000119986	366.804	0.99126	3.20013e-10	AVPI1
60	chr10	112170369	112170880	512	*	18	1847	ENSG00000138166	787.259	-0.593307	0.0110305	DUSP5
61	chr11	355489	356436	948	*	263	338707	ENSG00000182272	1110.71	-0.603244	0.00209394	B4GALNT4
62	chr11	843827	844806	980	*	493	7106	ENSG00000214063	4504.29	0.286714	0.0220432	TSPAN4
63	chr11	6340835	6341474	640	*	52	112464	ENSG00000170955	2094.46	0.830231	1.08936e-09	CAVIN3
64	chr11	8939027	8939344	318	*	67	56672	ENSG00000166452	922.101	0.283238	0.0335797	AKIP1
65	chr11	9685672	9685988	317	*	90	23075	ENSG00000133789	3816.15	0.670328	3.6853e-15	SWAP70
66	chr11	9787186	9787560	375	*	339	440028	ENSG00000245522	102.798	2.26506	1.45604e-21	AC026250.1
67	chr11	9927781	9928133	353	*	24	81846	ENSG00000133812	3829.91	0.306652	0.00543574	SBF2
68	chr11	10315832	10316481	650	*	74	81846	ENSG00000133812	3829.91	0.306652	0.00543574	SBF2
69	chr11	12065501	12065883	383	*	159	27122	ENSG00000050165	22309.3	0.307104	0.028314	DKK3
70	chr11	12204273	12204587	315	*	120	9645	ENSG00000133816	7480.93	1.53283	3.87203e-31	MICAL2
71	chr11	12221949	12222713	765	*	58	9645	ENSG00000133816	7480.93	1.53283	3.87203e-31	MICAL2
72	chr11	12307969	12308403	435	*	36	84953	ENSG00000133816	7480.93	1.53283	3.87203e-31	MICAL2
73	chr11	12398728	12399341	614	*	444	55742	ENSG00000197702	12811.8	0.98363	3.10445e-84	PARVA
74	chr11	12439588	12440294	707	*	39	55742	ENSG00000197702	12811.8	0.98363	3.10445e-84	PARVA
75	chr11	14443839	14444215	377	*	191	22800	ENSG00000133818	2136.44	1.20058	1.87231e-35	RRAS2
76	chr11	19391844	19392220	377	*	77	89797	ENSG00000166833	2387.67	0.836171	1.45701e-11	NAV2
77	chr11	35103927	35104185	259	*	52	960	ENSG00000026508	26250	1.04307	7.91847e-20	CD44
78	chr11	35104949	35105468	520	*	69	960	ENSG00000026508	26250	1.04307	7.91847e-20	CD44
79	chr11	35121076	35121919	844	*	111	960	ENSG00000026508	26250	1.04307	7.91847e-20	CD44
80	chr11	36469026	36469974	949	*	105	79899	ENSG00000135362	1135.68	1.40843	1.5257e-37	PRR5L
81	chr11	44009067	44009525	459	*	37	387763	ENSG00000187479	147.521	-0.629922	0.00649783	C11orf96
82	chr11	46312294	46312889	596	*	153	90993	ENSG00000157613	742.929	1.33166	4.26402e-20	CREB3L1
83	chr11	46316827	46317184	358	*	38	90993	ENSG00000157613	742.929	1.33166	4.26402e-20	CREB3L1
84	chr11	57545545	57546305	761	*	174	1500	ENSG00000198561	17473.5	-0.493167	1.57772e-10	CTNND1
85	chr11	62276155	62276573	419	*	51	79026	ENSG00000124942	122265	1.31232	7.23865e-55	AHNAK
86	chr11	62312607	62313996	1390	*	146	79026	ENSG00000124942	122265	1.31232	7.23865e-55	AHNAK
87	chr11	62320800	62321240	441	*	38	79026	ENSG00000124942	122265	1.31232	7.23865e-55	AHNAK
88	chr11	64622417	64622721	305	*	133	10938	ENSG00000110047	3523.99	1.14983	2.59331e-14	EHD1
89	chr11	64649077	64649334	258	*	23	10938	ENSG00000110047	3523.99	1.14983	2.59331e-14	EHD1
90	chr11	65325933	65326245	313	*	52	4054	ENSG00000168056	6500.71	-0.624296	1.33474e-06	LTBP3
91	chr11	65836942	65837240	299	*	26	55690	ENSG00000175115	5469.33	0.739179	5.1211e-16	PACS1
92	chr11	67780335	67781497	1163	*	373	221	ENSG00000006534	1300.36	0.874666	1.49112e-17	ALDH3B1
93	chr11	68121673	68122150	478	*	81	4041	ENSG00000162337	4117.86	0.760849	6.74202e-19	LRP5
94	chr11	69311795	69312508	714	*	340	595	ENSG00000110092	9113.41	1.17244	1.54513e-15	CCND1
95	chr11	69451331	69451765	435	*	287	595	ENSG00000110092	9113.41	1.17244	1.54513e-15	CCND1
96	chr11	76841869	76842265	397	*	20	4647	ENSG00000137474	246.396	-0.882478	0.000522678	MYO7A
97	chr11	78076388	78076753	366	*	29	9846	ENSG00000033327	601.059	0.609389	0.00355791	GAB2
98	chr11	85780367	85780966	600	*	54	8301	ENSG00000073921	8631.63	0.508905	9.70343e-06	PICALM
99	chr11	86451743	86452412	670	*	164	11098	ENSG00000150687	21726.2	0.52492	8.2095e-05	PRSS23
100	chr11	101881810	101882194	385	*	138	85016	ENSG00000137691	138.324	-1.03092	7.8401e-06	CFAP300
101	chr11	101980790	101981077	288	*	11	10413	ENSG00000137693	7292.14	1.49656	1.75807e-73	YAP1
102	chr11	101982302	101982654	353	*	45	10413	ENSG00000137693	7292.14	1.49656	1.75807e-73	YAP1
103	chr11	113423910	113424358	449	*	146	1813	ENSG00000149295	181.345	-1.69951	1.06957e-12	DRD2
104	chr11	114033451	114033746	296	*	60	4837	ENSG00000166741	7823.23	1.64406	1.02886e-17	NNMT
105	chr11	114163101	114163752	652	*	40	4837	ENSG00000166741	7823.23	1.64406	1.02886e-17	NNMT
106	chr11	114165660	114166745	1086	*	215	4837	ENSG00000166741	7823.23	1.64406	1.02886e-17	NNMT
107	chr11	114178170	114178516	347	*	58	4837	ENSG00000166741	7823.23	1.64406	1.02886e-17	NNMT
108	chr11	116064234	116064588	355	*	38	283143	ENSG00000246100	27.3923	1.88336	0.00153406	LINC00900
109	chr11	116165568	116165954	387	*	105	84811	ENSG00000137656	1709.78	0.296365	0.000163151	BUD13
110	chr11	117069784	117070058	275	*	49	6876	ENSG00000149591	4862.19	4.15483	3.48825e-74	TAGLN
111	chr11	118790380	118790702	323	*	19	283149	ENSG00000186174	9610.65	0.323327	0.0104802	BCL9L
112	chr11	119454860	119455274	415	*	58	5818	ENSG00000110400	3123.16	-0.393503	0.0475568	NECTIN1
113	chr11	121337186	121337565	380	*	52	6653	ENSG00000137642	4958.87	0.50111	0.000253621	SORL1
114	chr11	125260776	125261290	515	*	101	63876	ENSG00000165495	537.562	-1.52532	9.88286e-21	PKNOX2
115	chr11	128078002	128078509	508	*	60	2113	ENSG00000134954	13708.9	0.899227	6.01263e-33	ETS1
116	chr11	128080300	128081133	834	*	56	2113	ENSG00000134954	13708.9	0.899227	6.01263e-33	ETS1
117	chr11	128351195	128351501	307	*	78	2113	ENSG00000134954	13708.9	0.899227	6.01263e-33	ETS1
118	chr11	128372581	128373071	491	*	56	2113	ENSG00000134954	13708.9	0.899227	6.01263e-33	ETS1
119	chr11	128391683	128392123	441	*	39	2113	ENSG00000134954	13708.9	0.899227	6.01263e-33	ETS1
120	chr11	128392416	128392706	291	*	152	2113	ENSG00000134954	13708.9	0.899227	6.01263e-33	ETS1
121	chr11	130348299	130349056	758	*	38	170689	ENSG00000166106	608.323	0.845502	7.58891e-11	ADAMTS15
122	chr11	130350333	130350607	275	*	12	170689	ENSG00000166106	608.323	0.845502	7.58891e-11	ADAMTS15
123	chr12	1714807	1715268	462	*	52	81029	ENSG00000111186	481.159	2.33857	2.37663e-35	WNT5B
124	chr12	8122893	8123555	663	*	347	6515	ENSG00000059804	3270.07	0.878659	0.000230206	SLC2A3
125	chr12	12419925	12420296	372	*	378	4040	ENSG00000070018	2588.51	-0.812214	7.70295e-11	LRP6
126	chr12	14413562	14413821	260	*	174	55729	ENSG00000171681	4087.28	-0.217908	0.0394223	ATF7IP
127	chr12	48162361	48162681	321	*	17	10411	ENSG00000079337	1404.25	-0.529699	0.00263978	RAPGEF3
128	chr12	48214295	48214642	348	*	89	51564	ENSG00000061273	5153.46	0.267199	0.00195943	HDAC7
129	chr12	52585646	52586238	593	*	174	144501	ENSG00000167767	1730.68	7.59266	1.9288e-267	KRT80
130	chr12	52674686	52675158	473	*	196	3892	ENSG00000170442	789.172	5.14302	2.70737e-160	KRT86
131	chr12	53318538	53319368	831	*	69	3856	ENSG00000170421	14283.6	4.64212	0	KRT8
132	chr12	53339108	53339865	758	*	69	3875	ENSG00000111057	26282.3	3.17539	3.95392e-171	KRT18
133	chr12	54238921	54239402	482	*	74	3229	ENSG00000123364	1296.22	0.95554	1.34847e-13	HOXC13
134	chr12	56614848	56615309	462	*	30	10193	ENSG00000181852	3274.28	1.12798	9.81324e-11	RNF41
135	chr12	57230122	57230526	405	*	85	8630	ENSG00000025423	125.522	0.741781	0.00108927	HSD17B6
136	chr12	58258971	58259397	427	*	95	10106	ENSG00000175215	12475.2	0.387778	1.36763e-07	CTDSP2
137	chr12	65672464	65672880	417	*	23	253827	ENSG00000174099	1780.2	1.50518	4.86881e-39	MSRB3
138	chr12	66285880	66286286	407	*	37	8091	ENSG00000149948	5164.38	1.29416	7.88296e-20	HMGA2
139	chr12	66290051	66290336	286	*	37	8091	ENSG00000149948	5164.38	1.29416	7.88296e-20	HMGA2
140	chr12	76371820	76372207	388	*	30	22822	ENSG00000139289	5771.94	-0.571282	0.00072305	PHLDA1
141	chr12	94179180	94179599	420	*	30	8738	ENSG00000169372	389.304	0.800483	5.77161e-12	CRADD
142	chr12	104612982	104613669	688	*	77	7296	ENSG00000198431	33083.7	2.59361	2.98478e-47	TXNRD1
143	chr12	105879193	105879720	528	*	23	387882	ENSG00000235162	2759.52	1.05636	7.55025e-29	C12orf75
144	chr12	106424495	106424846	352	*	114	9891	ENSG00000074590	3145.05	2.22183	8.46836e-89	NUAK1
145	chr12	106468366	106469154	789	*	77	9891	ENSG00000074590	3145.05	2.22183	8.46836e-89	NUAK1
146	chr12	106477725	106478039	315	*	86	9891	ENSG00000074590	3145.05	2.22183	8.46836e-89	NUAK1
147	chr12	106517472	106517733	262	*	60	9891	ENSG00000074590	3145.05	2.22183	8.46836e-89	NUAK1
148	chr12	107487861	107488260	400	*	86	1407	ENSG00000008405	1344.1	1.13534	1.50817e-19	CRY1
149	chr12	110547203	110547467	265	*	45	28981	ENSG00000122970	713.799	-0.704328	0.000241061	IFT81
150	chr12	120524622	120524935	314	*	95	92558	ENSG00000135127	37.5426	3.71829	1.48078e-14	BICDL1
151	chr12	122362573	122363015	443	*	143	144406	ENSG00000158023	107.177	2.38594	5.72694e-13	WDR66
152	chr12	124985044	124985492	449	*	164	9612	ENSG00000196498	5055.34	0.359341	0.00411408	NCOR2
153	chr12	125399323	125399731	409	*	52	7316	ENSG00000150991	59339.5	0.47425	1.75491e-05	UBC
154	chr13	21635103	21635912	810	*	361	26524	ENSG00000150457	922.068	1.52978	1.93053e-42	LATS2
155	chr13	30716638	30716998	361	*	95	84056	ENSG00000102781	513.565	0.338352	0.0152905	KATNAL1
156	chr13	47149937	47150222	286	*	22	23143	ENSG00000136141	1532.93	-0.309853	0.0117867	LRCH1
157	chr13	49888203	49888509	307	*	37	81602	ENSG00000102543	324.191	0.393956	0.00436536	CDADC1
158	chr13	60737079	60737981	903	*	48	81624	ENSG00000139734	4667.7	1.18786	5.74649e-13	DIAPH3
159	chr13	78549376	78549892	517	*	33	1910	ENSG00000136160	780.204	0.738363	4.27901e-07	EDNRB
160	chr13	80510585	80511317	733	*	52	10253	ENSG00000136158	1269.95	-0.588033	9.34285e-07	SPRY2
161	chr13	81030328	81030675	348	*	20	10253	ENSG00000136158	1269.95	-0.588033	9.34285e-07	SPRY2
162	chr13	97774389	97775392	1004	*	60	10150	ENSG00000139793	5478.88	0.497482	0.0348741	MBNL2
163	chr13	97845914	97847006	1093	*	94	10150	ENSG00000139793	5478.88	0.497482	0.0348741	MBNL2
164	chr13	97874681	97876342	1662	*	25	10150	ENSG00000139793	5478.88	0.497482	0.0348741	MBNL2
165	chr13	97908526	97908826	301	*	22	10150	ENSG00000139793	5478.88	0.497482	0.0348741	MBNL2
166	chr13	97910015	97911140	1126	*	44	10150	ENSG00000139793	5478.88	0.497482	0.0348741	MBNL2
167	chr13	97927088	97927361	274	*	67	10150	ENSG00000139793	5478.88	0.497482	0.0348741	MBNL2
168	chr13	97959831	97961450	1620	*	345	10150	ENSG00000139793	5478.88	0.497482	0.0348741	MBNL2
169	chr13	97980281	97980794	514	*	65	10150	ENSG00000139793	5478.88	0.497482	0.0348741	MBNL2
170	chr13	102108183	102108524	342	*	53	9358	ENSG00000198542	61.5858	3.1958	8.06939e-17	ITGBL1
171	chr13	102164992	102165294	303	*	22	9358	ENSG00000198542	61.5858	3.1958	8.06939e-17	ITGBL1
172	chr13	114884318	114885047	730	*	123	22821	ENSG00000185989	1805.92	0.462363	0.00120626	RASA3
173	chr14	23082912	23083540	629	*	130	63874	ENSG00000100439	4610.11	0.519024	8.35871e-05	ABHD4
174	chr14	23449613	23450968	1356	*	1429	84962	ENSG00000129474	9629.72	2.98002	1.5173e-69	AJUBA
175	chr14	23451833	23452477	645	*	885	84962	ENSG00000129474	9629.72	2.98002	1.5173e-69	AJUBA
176	chr14	55031972	55032386	415	*	12	23034	ENSG00000020577	2581.58	1.42554	1.10763e-29	SAMD4A
177	chr14	55118581	55119512	932	*	311	23034	ENSG00000020577	2581.58	1.42554	1.10763e-29	SAMD4A
178	chr14	55240189	55240475	287	*	52	23034	ENSG00000020577	2581.58	1.42554	1.10763e-29	SAMD4A
179	chr14	61645457	61645774	318	*	23	5583	ENSG00000027075	883.7	0.703861	6.25919e-10	PRKCH
180	chr14	62028132	62028842	711	*	86	400221	ENSG00000232774	143.212	2.44556	2.37935e-32	AL355916.1
181	chr14	73084087	73084440	354	*	23	8110	ENSG00000205683	481.236	-0.726175	0.000217984	DPF3
182	chr14	89021184	89021544	361	*	104	11099	ENSG00000070778	1232.53	0.957848	2.02755e-22	AL162171.1
183	chr14	100040747	100041237	491	*	104	317762	ENSG00000205476	2884.1	1.49178	7.03109e-33	CCDC85C
184	chr15	57719653	57720169	517	*	102	84952	ENSG00000128849	895.542	1.06879	3.37704e-13	CGNL1
185	chr15	57843980	57844277	298	*	196	100820829	ENSG00000263155	230.265	0.545946	0.0058883	MYZAP
186	chr15	58762023	58762459	437	*	164	3990	ENSG00000166035	496.226	0.522906	0.00124965	LIPC
187	chr15	58839441	58839708	268	*	17	102	ENSG00000137845	7600.93	-0.643185	2.12029e-08	ADAM10
188	chr15	59063573	59064048	476	*	23	54629	ENSG00000128923	1015.7	-0.817668	9.90422e-06	MINDY2
189	chr15	60689716	60690450	735	*	302	302	ENSG00000182718	106891	1.1335	2.5958e-44	ANXA2
190	chr15	63268526	63269190	665	*	60	7168	ENSG00000140416	23789.7	1.80673	7.03184e-65	TPM1
191	chr15	63337020	63337462	443	*	96	7168	ENSG00000140416	23789.7	1.80673	7.03184e-65	TPM1
192	chr15	63414111	63414391	281	*	22	114294	ENSG00000103642	732.05	1.29802	1.48033e-23	LACTB
193	chr15	66088669	66089001	333	*	30	10260	ENSG00000174485	1554.56	-0.447265	0.0299576	DENND4A
194	chr15	67055636	67055984	349	*	45	4091	ENSG00000137834	1299.99	1.17263	1.01791e-14	SMAD6
195	chr15	67058182	67058687	506	*	57	4091	ENSG00000137834	1299.99	1.17263	1.01791e-14	SMAD6
196	chr15	67095516	67095881	366	*	114	4091	ENSG00000137834	1299.99	1.17263	1.01791e-14	SMAD6
197	chr15	67175511	67176123	613	*	1228	4091	ENSG00000137834	1299.99	1.17263	1.01791e-14	SMAD6
198	chr15	67223905	67224284	380	*	58	4088	ENSG00000166949	7634.38	0.367479	5.13272e-05	SMAD3
199	chr15	67336643	67337123	481	*	229	4088	ENSG00000166949	7634.38	0.367479	5.13272e-05	SMAD3
200	chr15	67397813	67398320	508	*	23	4088	ENSG00000166949	7634.38	0.367479	5.13272e-05	SMAD3
201	chr15	67401605	67402067	463	*	152	4088	ENSG00000166949	7634.38	0.367479	5.13272e-05	SMAD3
202	chr15	67442228	67442870	643	*	30	4088	ENSG00000166949	7634.38	0.367479	5.13272e-05	SMAD3
203	chr15	67470904	67471304	401	*	192	4088	ENSG00000166949	7634.38	0.367479	5.13272e-05	SMAD3
204	chr15	74488207	74488593	387	*	19	64220	ENSG00000137868	466.776	-1.59637	1.13237e-14	STRA6
205	chr15	74501838	74502186	349	*	72	64220	ENSG00000137868	466.776	-1.59637	1.13237e-14	STRA6
206	chr15	79296668	79296972	305	*	60	5923	ENSG00000058335	134.707	2.8937	2.92933e-22	RASGRF1
207	chr15	80773028	80773502	475	*	69	9915	ENSG00000172379	978.215	2.34553	1.76795e-55	ARNT2
208	chr15	83478872	83479421	550	*	23	123720	ENSG00000156232	724.845	0.950626	3.26449e-12	WHAMM
209	chr15	83989428	83989742	315	*	12	646	ENSG00000169594	1562.45	1.84557	2.10396e-19	BNC1
210	chr15	90955823	90956124	302	*	60	8826	ENSG00000140575	16665.1	0.553504	1.43227e-07	IQGAP1
211	chr15	96703904	96704280	377	*	17	7026	ENSG00000185551	5643.97	0.577229	1.26835e-06	NR2F2
212	chr15	96808034	96808347	314	*	33	7026	ENSG00000185551	5643.97	0.577229	1.26835e-06	NR2F2
213	chr15	101663625	101663995	371	*	23	22856	ENSG00000131873	3084.92	-0.456028	5.5456e-09	CHSY1
214	chr16	122632	123022	391	*	105	64285	ENSG00000007384	1735.66	0.559784	2.07583e-06	RHBDF1
215	chr16	2885818	2886111	294	*	84	124220	ENSG00000162078	226.874	0.51855	0.00978897	ZG16B
216	chr16	3070424	3071127	704	*	69	51330	ENSG00000006327	3033.22	3.33949	1.75332e-109	TNFRSF12A
217	chr16	3071665	3072737	1073	*	174	51330	ENSG00000006327	3033.22	3.33949	1.75332e-109	TNFRSF12A
218	chr16	23916392	23916936	545	*	139	5579	ENSG00000166501	1065.83	-1.65551	3.34372e-20	PRKCB
219	chr16	24508293	24508567	275	*	45	5930	ENSG00000122257	2157.77	-0.35076	0.0418128	RBBP6
220	chr16	24551207	24551508	302	*	24	5930	ENSG00000122257	2157.77	-0.35076	0.0418128	RBBP6
221	chr16	24647313	24647791	479	*	135	5930	ENSG00000122257	2157.77	-0.35076	0.0418128	RBBP6
222	chr16	24657768	24658027	260	*	45	27327	ENSG00000090905	4408.84	-0.471882	1.73242e-05	TNRC6A
223	chr16	24712329	24712742	414	*	74	27327	ENSG00000090905	4408.84	-0.471882	1.73242e-05	TNRC6A
224	chr16	30064485	30065116	632	*	76	226	ENSG00000149925	42268.5	0.537815	6.6329e-05	ALDOA
225	chr16	31150057	31150570	514	*	30	5652	ENSG00000052344	17.4747	2.06235	0.000772416	PRSS8
226	chr16	46782372	46782661	290	*	40	91807	ENSG00000140795	310.161	1.71153	2.2728e-24	MYLK3
227	chr16	53089042	53089337	296	*	37	80205	ENSG00000177200	2148.66	-1.25721	3.85244e-08	CHD9
228	chr16	56848498	56849047	550	*	185	9688	ENSG00000102900	5090.17	0.412151	4.54184e-07	NUP93
229	chr16	57570068	57570480	413	*	65	92922	ENSG00000135736	865.651	-0.371371	0.0363329	CCDC102A
230	chr16	66908556	66909073	518	*	52	57546	ENSG00000172840	1653.37	0.601947	1.28167e-10	PDP2
231	chr16	68002219	68002601	383	*	43	6560	ENSG00000124067	2661.8	1.22436	1.40778e-17	SLC12A4
232	chr16	68679683	68680140	458	*	52	1001	ENSG00000062038	1193.52	0.906881	1.793e-12	CDH3
233	chr16	68741230	68741915	686	*	484	999	ENSG00000039068	23.8792	3.13697	1.16631e-05	CDH1
234	chr16	68824045	68824395	351	*	36	999	ENSG00000039068	23.8792	3.13697	1.16631e-05	CDH1
235	chr16	70728005	70728910	906	*	165	92154	ENSG00000132613	4140.21	1.12443	3.25915e-26	MTSS1L
236	chr16	71663055	71663326	272	*	30	91862	ENSG00000140832	105.416	-1.47191	1.14828e-08	MARVELD3
237	chr16	75278976	75279622	647	*	210	9564	ENSG00000050820	5994.36	0.407616	0.000393405	BCAR1
238	chr16	75287317	75287687	371	*	126	9564	ENSG00000050820	5994.36	0.407616	0.000393405	BCAR1
239	chr16	77868278	77868626	349	*	17	57687	ENSG00000171724	15308.2	-0.344071	0.00693538	VAT1L
240	chr16	77930456	77930776	321	*	60	57687	ENSG00000171724	15308.2	-0.344071	0.00693538	VAT1L
241	chr16	80966773	80967083	311	*	34	55839	ENSG00000166451	2368.5	0.553452	0.000308303	CENPN
242	chr16	82038351	82038610	260	*	33	93517	ENSG00000184860	246.939	2.08593	9.954e-23	SDR42E1
243	chr16	82667758	82668084	327	*	30	1012	ENSG00000140945	11715.2	0.779044	5.42782e-11	CDH13
244	chr16	82687616	82687913	298	*	133	1012	ENSG00000140945	11715.2	0.779044	5.42782e-11	CDH13
245	chr16	84565888	84566173	286	*	263	57707	ENSG00000140950	2844.52	0.881369	1.07255e-13	MEAK7
246	chr16	88365647	88366127	481	*	146	84627	ENSG00000225614	430.187	1.34512	9.15504e-12	ZNF469
247	chr17	783017	783542	526	*	93	64359	ENSG00000167693	1791.1	1.93486	1.04835e-59	NXN
248	chr17	836637	836916	280	*	174	64359	ENSG00000167693	1791.1	1.93486	1.04835e-59	NXN
249	chr17	854803	855462	660	*	261	64359	ENSG00000167693	1791.1	1.93486	1.04835e-59	NXN
250	chr17	1391299	1391915	617	*	995	4641	ENSG00000197879	10838.9	1.23074	1.00798e-26	MYO1C
251	chr17	1682984	1683275	292	*	23	5176	ENSG00000132386	435.853	-1.45542	4.74134e-17	SERPINF1
252	chr17	3571288	3571708	421	*	120	30851	ENSG00000213977	4806.33	1.0566	7.03081e-18	TAX1BP3
253	chr17	7254529	7255474	946	*	573	147040	ENSG00000213859	1277.42	0.691127	9.26904e-07	KCTD11
254	chr17	8760323	8760592	270	*	11	146850	ENSG00000276231	45.7568	1.06717	0.00155725	PIK3R6
255	chr17	9551502	9552052	551	*	153	124739	ENSG00000154914	231.423	1.88904	8.07608e-28	USP43
256	chr17	17843351	17844209	859	*	37	146691	ENSG00000175662	4289.41	0.454992	0.00049127	TOM1L2
257	chr17	36607100	36607720	621	*	744	57636	ENSG00000275832	5404.48	1.12224	5.86034e-37	ARHGAP23
258	chr17	36620868	36621397	530	*	75	57636	ENSG00000275832	5404.48	1.12224	5.86034e-37	ARHGAP23
259	chr17	38269796	38270102	307	*	30	339287	ENSG00000188895	3890.62	-0.379502	1.23891e-05	MSL1
260	chr17	40575233	40575965	733	*	398	284119	ENSG00000177469	22717.4	1.68956	2.24052e-38	CAVIN1
261	chr17	41607973	41608311	339	*	36	2118	ENSG00000175832	2074.54	-1.30621	3.42761e-09	ETV4
262	chr17	42620499	42620814	316	*	95	2535	ENSG00000180340	1127.5	1.08937	1.0529e-16	FZD2
263	chr17	43448803	43449797	995	*	844	201176	ENSG00000159314	474.162	-0.487731	0.02059	ARHGAP27
264	chr17	47099626	47100213	588	*	69	10642	ENSG00000159217	4568.37	0.444338	2.88709e-10	IGF2BP1
265	chr17	47913737	47914249	513	*	52	729220	ENSG00000204584	22.0443	1.97488	0.000169171	FLJ45513
266	chr17	48105588	48106198	611	*	423	284080	ENSG00000246640	40.0976	2.30653	1.25985e-10	PICART1
267	chr17	48287766	48288048	283	*	139	1277	ENSG00000108821	951.61	1.44511	3.51714e-09	COL1A1
268	chr17	48296272	48296659	388	*	30	1277	ENSG00000108821	951.61	1.44511	3.51714e-09	COL1A1
269	chr17	53511290	53511717	428	*	37	23531	ENSG00000108960	3317.81	-1.80522	1.25864e-64	MMD
270	chr17	54618156	54618426	271	*	69	9241	ENSG00000183691	208.133	2.66163	7.77738e-18	NOG
271	chr17	54674927	54675249	323	*	11	9241	ENSG00000183691	208.133	2.66163	7.77738e-18	NOG
272	chr17	54776778	54777253	476	*	335	9241	ENSG00000183691	208.133	2.66163	7.77738e-18	NOG
273	chr17	55550823	55551166	344	*	69	124540	ENSG00000153944	3793.64	-0.608819	2.17849e-14	MSI2
274	chr17	55952432	55953028	597	*	275	51649	ENSG00000181610	2563.61	0.432015	1.40379e-07	MRPS23
275	chr17	57833365	57833963	599	*	37	81671	ENSG00000062716	6417.68	0.33375	0.00271821	VMP1
276	chr17	64948358	64948702	345	*	20	27092	ENSG00000075461	946.348	1.50325	4.88724e-16	CACNG4
277	chr17	70335322	70335750	429	*	185	6662	ENSG00000125398	2034.14	-0.714625	4.09154e-08	SOX9
278	chr17	73549106	73549585	480	*	174	3993	ENSG00000073350	1015.84	1.44372	7.88067e-45	LLGL2
279	chr17	76349080	76349568	489	*	287	9021	ENSG00000184557	897.818	1.17596	2.22813e-05	SOCS3
280	chr17	76879382	76879698	317	*	33	7077	ENSG00000035862	22643.2	0.561239	6.5866e-05	TIMP2
281	chr17	79393021	79393284	264	*	45	57597	ENSG00000266074	1925.24	-0.481661	0.00238881	BAHCC1
282	chr17	81066619	81067385	767	*	152	284207	ENSG00000176845	538.626	1.64933	6.19984e-27	METRNL
283	chr18	3247456	3247778	323	*	95	10627	ENSG00000101608	9438.49	1.07512	2.04872e-37	MYL12A
284	chr18	3261453	3262365	913	*	1036	103910	ENSG00000118680	10882.2	1.26543	2.54981e-95	MYL12B
285	chr18	10925846	10926263	418	*	45	63895	ENSG00000154864	3798.18	-1.24126	7.71909e-49	PIEZO2
286	chr18	12308451	12308825	375	*	67	84617	ENSG00000176014	6630.39	1.62274	5.12916e-24	TUBB6
287	chr18	21032635	21033036	402	*	60	8780	ENSG00000101782	2038.17	0.429043	0.00369062	RIOK3
288	chr18	43169234	43169991	758	*	95	8170	ENSG00000132874	38.0225	-1.71	5.24829e-05	SLC14A2
289	chr18	46456244	46456505	262	*	60	4092	ENSG00000101665	443.25	0.732495	0.00120225	SMAD7
290	chr18	56251878	56252268	391	*	60	115701	ENSG00000198796	2595.84	3.05642	5.31429e-43	ALPK2
291	chr18	74919591	74919935	345	*	30	2587	ENSG00000166573	16.9317	-1.92009	0.0220053	GALR1
292	chr18	77725352	77725768	417	*	45	440498	ENSG00000226742	284.455	1.29845	2.24195e-14	HSBP1L1
293	chr19	782252	782992	741	*	299	5725	ENSG00000011304	14317.1	0.343687	0.00094832	PTBP1
294	chr19	1027936	1028849	914	*	164	1265	ENSG00000064666	8063.88	1.38529	5.99e-55	CNN2
295	chr19	1361554	1361831	278	*	37	84939	ENSG00000160953	2910.55	-0.197067	0.00969004	PWWP3A
296	chr19	2462456	2463941	1486	*	4037	84823	ENSG00000176619	11542.5	0.515534	2.22813e-05	LMNB2
297	chr19	2540320	2541524	1205	*	889	4616	ENSG00000099860	977.097	2.94843	2.81085e-150	GADD45B
298	chr19	2578785	2579220	436	*	46	4616	ENSG00000099860	977.097	2.94843	2.81085e-150	GADD45B
299	chr19	6744832	6745182	351	*	69	9322	ENSG00000125733	3342.1	0.588537	8.29326e-22	TRIP10
300	chr19	10119513	10120072	560	*	95	50509	ENSG00000080573	625.534	-0.583078	0.00921547	COL5A3
301	chr19	13147874	13148322	449	*	10	4784	ENSG00000008441	4322.55	0.82356	2.6466e-17	NFIX
302	chr19	13164686	13165028	343	*	299	4784	ENSG00000008441	4322.55	0.82356	2.6466e-17	NFIX
303	chr19	15217867	15218127	261	*	69	85360	ENSG00000105137	3531.24	1.11461	7.12441e-20	SYDE1
304	chr19	17403331	17403630	300	*	60	126549	ENSG00000160117	635.535	-0.377979	0.00249441	ANKLE1
305	chr19	34971987	34972691	705	*	1010	126374	ENSG00000142279	955.442	2.30848	5.49453e-35	WTIP
306	chr19	39420787	39421056	270	*	45	54938	ENSG00000104835	871.207	-0.493161	0.000915509	SARS2
307	chr19	39919116	39919508	393	*	335	6217	ENSG00000105193	19557.7	0.342075	0.00871747	RPS16
308	chr19	41731721	41732368	648	*	169	558	ENSG00000167601	11912.6	3.19868	1.04278e-80	AXL
309	chr19	45129235	45129594	360	*	164	147710	ENSG00000216588	35.7386	3.03018	4.16767e-16	IGSF23
310	chr19	45879617	45879985	369	*	252	2068	ENSG00000104884	3374.31	1.21307	1.05454e-26	ERCC2
311	chr19	46714594	46714921	328	*	69	93429	ENSG00000268460	30.2804	0.998705	0.0127433	AC006262.1
312	chr19	47660872	47661161	290	*	69	10055	ENSG00000142230	11296.5	0.535864	1.76617e-11	SAE1
313	chr19	48222464	48223086	623	*	323	30846	ENSG00000024422	10312.9	0.797585	7.82585e-13	EHD2
314	chr19	48246324	48246698	375	*	30	29997	ENSG00000105373	6803	0.344298	0.031614	NOP53
315	chr19	50143944	50144269	326	*	30	6237	ENSG00000126458	2730.53	0.700995	1.65814e-06	RRAS
316	chr19	54362249	54362538	290	*	52	91663	ENSG00000179820	3260.6	1.26994	1.20473e-28	MYADM
317	chr19	57439175	57439468	294	*	12	100073347	ENSG00000268654	17.015	-1.40336	0.0226242	MIMT1
318	chr2	1759470	1759855	386	*	10	7837	ENSG00000130508	21810.7	0.271883	0.00213985	PXDN
319	chr2	1795916	1796463	548	*	69	7837	ENSG00000130508	21810.7	0.271883	0.00213985	PXDN
320	chr2	12959365	12959825	461	*	52	100422986	ENSG00000264370	7.11743	-3.8761	0.00602504	MIR3125
321	chr2	20212343	20212760	418	*	82	4148	ENSG00000132031	531.015	1.77289	8.00925e-35	MATN3
322	chr2	23787410	23787677	268	*	15	114818	ENSG00000119771	1265.21	0.984978	1.28128e-10	KLHL29
323	chr2	28619533	28620004	472	*	174	2355	ENSG00000075426	5985.01	1.16995	2.26759e-27	FOSL2
324	chr2	31510648	31510982	335	*	45	30845	ENSG00000013016	6392.77	-1.18967	2.04011e-16	EHD3
325	chr2	36598512	36599788	1277	*	104	51232	ENSG00000150938	9816.06	2.43898	7.78523e-106	CRIM1
326	chr2	36608141	36608427	287	*	69	51232	ENSG00000150938	9816.06	2.43898	7.78523e-106	CRIM1
327	chr2	37817298	37817610	313	*	52	10602	ENSG00000163171	1854.37	3.10521	1.03964e-44	CDC42EP3
328	chr2	37995788	37996157	370	*	119	10602	ENSG00000163171	1854.37	3.10521	1.03964e-44	CDC42EP3
329	chr2	42365721	42365987	267	*	171	27436	ENSG00000143924	8450.37	-1.26665	6.79035e-37	EML4
330	chr2	43269100	43269362	263	*	196	678	ENSG00000152518	1694.9	-0.25093	0.0202086	ZFP36L2
331	chr2	43313576	43314014	439	*	69	678	ENSG00000152518	1694.9	-0.25093	0.0202086	ZFP36L2
332	chr2	43452061	43452327	267	*	23	678	ENSG00000152518	1694.9	-0.25093	0.0202086	ZFP36L2
333	chr2	46166084	46166380	297	*	52	5581	ENSG00000171132	1501.61	1.82723	1.06072e-18	PRKCE
334	chr2	46294732	46295067	336	*	38	2034	ENSG00000116016	9233.83	0.864745	9.51982e-19	EPAS1
335	chr2	46324833	46325342	510	*	60	2034	ENSG00000116016	9233.83	0.864745	9.51982e-19	EPAS1
336	chr2	47082393	47082726	334	*	30	100134259	ENSG00000239332	98.2556	1.47312	3.98158e-08	LINC01119
337	chr2	47261357	47262006	650	*	385	57217	ENSG00000068724	1548.82	1.09971	2.22768e-29	TTC7A
338	chr2	47297012	47297694	683	*	157	57217	ENSG00000068724	1548.82	1.09971	2.22768e-29	TTC7A
339	chr2	54892808	54893067	260	*	17	6711	ENSG00000115306	22759.7	-0.44572	4.34411e-15	SPTBN1
340	chr2	64881252	64882185	934	*	524	9792	ENSG00000179833	1650.9	1.07921	5.93948e-24	SERTAD2
341	chr2	64995020	64995286	267	*	38	9792	ENSG00000179833	1650.9	1.07921	5.93948e-24	SERTAD2
342	chr2	71970378	71970822	445	*	60	8291	ENSG00000135636	2529.15	0.837814	8.09192e-09	DYSF
343	chr2	85034081	85034438	358	*	23	129293	ENSG00000186854	897.35	0.98795	2.10298e-20	TRABD2A
344	chr2	100323892	100324162	271	*	11	51455	ENSG00000135945	1476.61	-0.388212	0.0133239	REV1
345	chr2	101680065	101680357	293	*	23	11138	ENSG00000204634	2589.11	-0.454573	2.87414e-09	TBC1D8
346	chr2	102422721	102423005	285	*	30	9448	ENSG00000071054	13426.5	-0.626051	3.36479e-24	MAP4K4
347	chr2	102649874	102650159	286	*	114	7850	ENSG00000115590	12.0581	-2.20557	0.00299152	IL1R2
348	chr2	121672588	121673530	943	*	123	2736	ENSG00000074047	1186.16	0.899172	6.96913e-07	GLI2
349	chr2	121692915	121693341	427	*	60	2736	ENSG00000074047	1186.16	0.899172	6.96913e-07	GLI2
350	chr2	121694657	121695161	505	*	23	2736	ENSG00000074047	1186.16	0.899172	6.96913e-07	GLI2
351	chr2	128432859	128433243	385	*	34	55679	ENSG00000072163	478.474	3.74133	6.06888e-98	LIMS2
352	chr2	129120439	129120787	349	*	142	9394	ENSG00000136720	1299.44	1.36534	1.18534e-16	HS6ST1
353	chr2	159314442	159315041	600	*	211	8502	ENSG00000144283	3485.23	0.500714	3.38181e-05	PKP4
354	chr2	172960330	172960646	317	*	17	1746	ENSG00000115844	377.912	-0.792234	0.000551006	DLX2
355	chr2	173647752	173648188	437	*	37	11069	ENSG00000091428	1768.71	-0.861659	8.30096e-12	RAPGEF4
356	chr2	192731708	192732269	562	*	52	8436	ENSG00000168497	121.51	7.17535	9.06174e-35	CAVIN2
357	chr2	220233574	220233832	259	*	17	23549	ENSG00000123992	2813.7	0.428262	3.44614e-05	DNPEP
358	chr2	233250324	233250763	440	*	120	347694	ENSG00000244280	5.85131	2.23089	0.0289941	ECEL1P2
359	chr2	235357742	235358019	278	*	17	10123	ENSG00000188042	1081.7	1.42629	9.91439e-25	ARL4C
360	chr2	235890038	235890450	413	*	287	23677	ENSG00000130147	4262.93	1.70477	2.85876e-65	SH3BP4
361	chr2	235905190	235905827	638	*	45	23677	ENSG00000130147	4262.93	1.70477	2.85876e-65	SH3BP4
362	chr2	238223793	238224104	312	*	133	1293	ENSG00000163359	4751.93	-1.02322	2.55496e-05	COL6A3
363	chr2	238341290	238341615	326	*	45	1293	ENSG00000163359	4751.93	-1.02322	2.55496e-05	COL6A3
364	chr20	304994	305383	390	*	20	6666	ENSG00000177732	4342.36	-0.268086	0.0120468	SOX12
365	chr20	2820877	2821281	405	*	20	64773	ENSG00000132635	3718.97	-0.214872	0.00703273	PCED1A
366	chr20	5637706	5638516	811	*	94	56261	ENSG00000125772	2138.03	-1.19534	3.39703e-08	GPCPD1
367	chr20	5730964	5731922	959	*	236	149840	ENSG00000171984	405.988	-0.756337	4.30519e-07	SHLD1
368	chr20	15458413	15458985	573	*	30	140733	ENSG00000172264	76.0226	-0.668064	0.0419361	MACROD2
369	chr20	17830666	17831141	476	*	94	27131	ENSG00000089006	7442.91	0.314059	0.000836608	SNX5
370	chr20	22744025	22744375	351	*	56	3170	ENSG00000125798	107.311	1.09461	5.20431e-05	FOXA2
371	chr20	22756320	22757008	689	*	24	3170	ENSG00000125798	107.311	1.09461	5.20431e-05	FOXA2
372	chr20	30300377	30301599	1223	*	152	598	ENSG00000171552	5620.75	1.8186	3.79988e-108	BCL2L1
373	chr20	30307845	30308569	725	*	180	598	ENSG00000171552	5620.75	1.8186	3.79988e-108	BCL2L1
374	chr20	32978385	32978861	477	*	113	83737	ENSG00000078747	4592.16	0.326966	0.0122201	ITCH
375	chr20	36536186	36536704	519	*	54	128434	ENSG00000132821	409.495	3.09682	8.24543e-66	VSTM2L
376	chr20	42838826	42839323	498	*	26	51526	ENSG00000132823	2909.23	0.595782	7.41617e-14	OSER1
377	chr20	42844950	42845318	369	*	17	100505783	ENSG00000223891	334.893	0.425466	0.0116688	OSER1-DT
378	chr20	43201625	43201969	345	*	28	11142	ENSG00000168734	2587.1	0.727044	1.1685e-06	PKIG
379	chr20	43966362	43966660	299	*	33	6385	ENSG00000124145	4176.42	1.72111	3.31891e-34	SDC4
380	chr20	44600466	44600869	404	*	49	63925	ENSG00000198026	1385.69	-0.20073	0.0332701	ZNF335
381	chr20	45902156	45902451	296	*	29	23613	ENSG00000101040	5516.74	-0.473604	3.95092e-06	ZMYND8
382	chr20	45987762	45988519	758	*	179	23613	ENSG00000101040	5516.74	-0.473604	3.95092e-06	ZMYND8
383	chr20	47155146	47155546	401	*	37	57580	ENSG00000124126	4692.44	0.448253	3.19505e-06	PREX1
384	chr20	49157486	49157795	310	*	147	5770	ENSG00000196396	5738.11	0.45382	4.29059e-10	PTPN1
385	chr20	49407284	49407715	432	*	96	55653	ENSG00000124243	1194.62	0.751132	7.13218e-08	BCAS4
386	chr20	52228074	52228382	309	*	61	7764	ENSG00000171940	4777.84	-0.284548	0.00309762	ZNF217
387	chr20	52237521	52238282	762	*	56	7764	ENSG00000171940	4777.84	-0.284548	0.00309762	ZNF217
388	chr20	52790525	52790851	327	*	37	1591	ENSG00000019186	230.735	1.08426	1.23947e-06	CYP24A1
389	chr20	55606089	55606573	485	*	81	655	ENSG00000101144	617.239	-2.46579	3.97107e-24	BMP7
390	chr20	61447250	61447555	306	*	22	1299	ENSG00000092758	4082.53	-0.769085	2.5356e-06	COL9A3
391	chr21	18899958	18900225	268	*	45	1525	ENSG00000154639	430.958	1.08868	1.42817e-08	CXADR
392	chr21	30631119	30631588	470	*	82	571	ENSG00000156273	2018.7	0.637138	0.00199064	BACH1
393	chr21	35899149	35899617	469	*	86	1827	ENSG00000159200	3868.5	1.6916	3.11602e-38	RCAN1
394	chr21	44144420	44144744	325	*	196	5152	ENSG00000160191	550.052	0.416131	0.00237001	PDE9A
395	chr21	46289913	46290181	269	*	86	754	ENSG00000183255	16185.7	1.26211	1.36224e-34	PTTG1IP
396	chr21	46348705	46349043	339	*	37	3689	ENSG00000160255	124.991	4.51218	1.0544e-43	ITGB2
397	chr22	19868621	19869072	452	*	207	10587	ENSG00000184470	1698.66	0.969891	1.9996e-21	TXNRD2
398	chr22	20923381	20923702	322	*	19	51586	ENSG00000099917	3949.81	0.580187	5.54737e-10	MED15
399	chr22	24603833	24604126	294	*	45	56241	ENSG00000099994	605.237	2.13755	1.30652e-34	SUSD2
400	chr22	26812912	26813292	381	*	123	57168	ENSG00000128203	456.486	0.96477	7.383e-18	ASPHD2
401	chr22	30602839	30603333	495	*	133	3976	ENSG00000128342	154.155	1.24321	3.5275e-05	LIF
402	chr22	36025786	36026155	370	*	229	4151	ENSG00000198125	5.19096	4.1287	0.00391189	MB
403	chr22	36725465	36726120	656	*	95	4627	ENSG00000100345	39701.7	1.69597	6.55241e-63	MYH9
404	chr22	36764587	36765371	785	*	143	4627	ENSG00000100345	39701.7	1.69597	6.55241e-63	MYH9
405	chr22	37893173	37893471	299	*	30	29775	ENSG00000100065	1474.57	1.09579	3.78776e-12	CARD10
406	chr22	37942123	37942481	359	*	69	11135	ENSG00000128283	3906.3	1.66022	5.54933e-20	CDC42EP1
407	chr22	37956847	37957348	502	*	69	11135	ENSG00000128283	3906.3	1.66022	5.54933e-20	CDC42EP1
408	chr22	38614686	38615080	395	*	153	23764	ENSG00000185022	607.032	2.0429	1.06826e-28	MAFF
409	chr22	39570745	39572785	2041	*	770	23492	ENSG00000100307	937.613	0.978174	1.41983e-10	CBX7
410	chr22	39867482	39867846	365	*	23	4248	ENSG00000128268	1251.71	0.968943	4.77218e-08	MGAT3
411	chr22	41686719	41687035	317	*	114	5905	ENSG00000100401	7733.94	0.651366	4.82951e-16	RANGAP1
412	chr22	42063285	42063611	327	*	30	4809	ENSG00000100138	7127.16	0.229772	0.02887	SNU13
413	chr22	46084606	46084919	314	*	54	25814	ENSG00000130638	5946.98	0.632411	2.22154e-11	ATXN10
414	chr22	50731767	50732557	791	*	584	23654	ENSG00000196576	10147.4	0.693129	4.58122e-12	PLXNB2
415	chr3	11641936	11642260	325	*	113	9686	ENSG00000144560	1747.14	-0.334142	0.0168748	VGLL4
416	chr3	11760965	11761840	876	*	347	9686	ENSG00000144560	1747.14	-0.334142	0.0168748	VGLL4
417	chr3	13034848	13035176	329	*	23	9922	ENSG00000144711	2478.42	0.382229	6.27064e-06	IQSEC1
418	chr3	16525302	16526428	1127	*	133	23180	ENSG00000131378	2508.13	0.976859	4.01433e-18	RFTN1
419	chr3	49506637	49507329	693	*	107	1605	ENSG00000173402	8402.8	0.95386	3.35857e-18	DAG1
420	chr3	50301808	50302548	741	*	102	7869	ENSG00000012171	1213.28	3.54445	1.25094e-71	SEMA3B
421	chr3	58033690	58034187	498	*	68	2317	ENSG00000136068	29152.8	1.89407	1.20322e-47	FLNB
422	chr3	111454057	111454368	312	*	52	90102	ENSG00000144824	5271.38	0.979028	4.40223e-09	PHLDB2
423	chr3	111578322	111578600	279	*	37	90102	ENSG00000144824	5271.38	0.979028	4.40223e-09	PHLDB2
424	chr3	124493126	124493603	478	*	263	3693	ENSG00000082781	9170.15	-0.532079	0.00314531	ITGB5
425	chr3	124597900	124598363	464	*	45	3693	ENSG00000082781	9170.15	-0.532079	0.00314531	ITGB5
426	chr3	124782026	124782362	337	*	114	57493	ENSG00000173706	10780.5	1.56138	1.49394e-99	HEG1
427	chr3	129330739	129330997	259	*	52	23129	ENSG00000004399	13090.3	0.343019	0.024793	PLXND1
428	chr3	134032225	134032601	377	*	123	51421	ENSG00000114019	5194.21	3.90863	0	AMOTL2
429	chr3	134045636	134046173	538	*	261	51421	ENSG00000114019	5194.21	3.90863	0	AMOTL2
430	chr3	134076332	134076949	618	*	192	51421	ENSG00000114019	5194.21	3.90863	0	AMOTL2
431	chr3	134077317	134077625	309	*	10	51421	ENSG00000114019	5194.21	3.90863	0	AMOTL2
432	chr3	134082696	134083239	544	*	645	51421	ENSG00000114019	5194.21	3.90863	0	AMOTL2
433	chr3	134092213	134093797	1585	*	961	51421	ENSG00000114019	5194.21	3.90863	0	AMOTL2
434	chr3	136505277	136505744	468	*	143	80723	ENSG00000168917	48.3912	0.768445	0.046347	SLC35G2
435	chr3	170469452	170469769	318	*	114	200916	ENSG00000163584	2206.74	0.305701	0.0211079	RPL22L1
436	chr3	171757589	171758116	528	*	67	64778	ENSG00000075420	3823.4	-0.510425	0.021812	FNDC3B
437	chr3	177196207	177196989	783	*	45	100505566	ENSG00000228221	8.05351	-2.63824	0.00953567	LINC00578
438	chr3	177233844	177234429	586	*	23	100505566	ENSG00000228221	8.05351	-2.63824	0.00953567	LINC00578
439	chr3	184286822	184287144	323	*	37	2049	ENSG00000182580	918.34	-0.71142	5.03258e-07	EPHB3
440	chr3	192596895	192597905	1011	*	196	151963	ENSG00000180611	492.152	1.20476	6.54337e-29	MB21D2
441	chr3	192607022	192607376	355	*	164	151963	ENSG00000180611	492.152	1.20476	6.54337e-29	MB21D2
442	chr3	194823637	194824260	624	*	123	152002	ENSG00000173950	1532.3	-0.264793	0.021812	XXYLT1
443	chr4	1779774	1780320	547	*	62	2261	ENSG00000068078	194.259	1.96399	3.98572e-10	FGFR3
444	chr4	7912518	7912776	259	*	23	60312	ENSG00000196526	8267.21	0.579882	6.87146e-10	AFAP1
445	chr4	41145281	41145556	276	*	45	323	ENSG00000163697	2409.95	0.768676	2.9295e-11	APBB2
446	chr4	77725068	77725345	278	*	17	57619	ENSG00000138771	3719.95	1.15131	3.16282e-29	SHROOM3
447	chr4	79490187	79490652	466	*	114	306	ENSG00000138772	816.372	3.39865	7.32173e-72	ANXA3
448	chr4	84176435	84176722	288	*	23	27235	ENSG00000173085	766.253	0.405795	9.91727e-05	COQ2
449	chr4	124753629	124753926	298	*	30	285419	ENSG00000249464	34.1632	-3.87417	5.73542e-15	LINC01091
450	chr4	129731925	129732353	429	*	60	79960	ENSG00000077684	1188.7	0.751534	3.48061e-05	JADE1
451	chr4	129733455	129733772	318	*	45	79960	ENSG00000077684	1188.7	0.751534	3.48061e-05	JADE1
452	chr4	143329330	143329597	268	*	52	8821	ENSG00000109452	1588.24	1.04984	5.29665e-15	INPP4B
453	chr4	159731308	159731853	546	*	77	57600	ENSG00000052795	1389.4	-0.625273	1.71226e-08	FNIP2
454	chr4	187354862	187355272	411	*	27	285441	ENSG00000251165	217.363	0.765455	0.0104516	F11-AS1
455	chr5	956680	957627	948	*	233	100506688	ENSG00000215246	130.567	2.1133	5.1211e-16	AC116351.1
456	chr5	1327633	1328504	872	*	384	81037	ENSG00000049656	15633	0.453294	1.7352e-07	CLPTM1L
457	chr5	10513926	10514734	809	*	141	651746	ENSG00000164236	166.909	1.69995	1.49364e-17	ANKRD33B
458	chr5	10551236	10552097	862	*	294	651746	ENSG00000164236	166.909	1.69995	1.49364e-17	ANKRD33B
459	chr5	10552688	10552969	282	*	53	651746	ENSG00000164236	166.909	1.69995	1.49364e-17	ANKRD33B
460	chr5	14035822	14036352	531	*	77	1767	ENSG00000039139	297.436	0.40408	0.0236201	DNAH5
461	chr5	14036749	14037478	730	*	60	1767	ENSG00000039139	297.436	0.40408	0.0236201	DNAH5
462	chr5	14270035	14270392	358	*	29	7204	ENSG00000038382	14689.8	0.745652	3.09705e-16	TRIO
463	chr5	17169474	17169762	289	*	28	10409	ENSG00000176788	2291.35	2.81758	3.98929e-80	BASP1
464	chr5	21111593	21111994	402	*	26	728411	ENSG00000183666	518.398	-0.580533	1.65708e-05	GUSBP1
465	chr5	31362426	31363063	638	*	39	29102	ENSG00000113360	5892.57	-0.294455	0.00034529	DROSHA
466	chr5	31853831	31854099	269	*	11	23037	ENSG00000133401	5704.21	0.3284	0.031081	PDZD2
467	chr5	33736408	33736681	274	*	39	81792	ENSG00000151388	10377	0.990664	1.61295e-22	ADAMTS12
468	chr5	33892176	33893068	893	*	71	81792	ENSG00000151388	10377	0.990664	1.61295e-22	ADAMTS12
469	chr5	34609234	34609521	288	*	81	26064	ENSG00000039560	6837	0.414674	0.0315034	RAI14
470	chr5	34610042	34610300	259	*	41	26064	ENSG00000039560	6837	0.414674	0.0315034	RAI14
471	chr5	38696955	38697581	627	*	65	3977	ENSG00000113594	13533.6	-1.75147	9.87774e-18	LIFR
472	chr5	40405575	40405875	301	*	11	5734	ENSG00000171522	362.934	-0.685883	0.0446117	PTGER4
473	chr5	52095156	52095617	462	*	195	53918	ENSG00000152684	2799.47	0.61498	7.4744e-15	PELO
474	chr5	54455975	54456254	280	*	52	493869	ENSG00000164294	5676.18	0.640834	3.51182e-07	GPX8
475	chr5	54930125	54930574	450	*	28	153129	ENSG00000177058	1524.41	-0.327726	0.00586598	SLC38A9
476	chr5	55290455	55291121	667	*	53	3572	ENSG00000134352	22565.5	-1.20831	0.000119891	IL6ST
477	chr5	55575888	55576220	333	*	108	79722	ENSG00000164512	43.2406	1.13882	0.0021008	ANKRD55
478	chr5	55642918	55643204	287	*	58	79722	ENSG00000164512	43.2406	1.13882	0.0021008	ANKRD55
479	chr5	55684433	55684739	307	*	15	79722	ENSG00000164512	43.2406	1.13882	0.0021008	ANKRD55
480	chr5	55864863	55865176	314	*	88	4214	ENSG00000095015	6834.52	0.372894	0.00144687	MAP3K1
481	chr5	56988528	56989496	969	*	76	345651	ENSG00000169067	62.3757	2.23566	2.74984e-10	ACTBL2
482	chr5	57137449	57138090	642	*	113	345651	ENSG00000169067	62.3757	2.23566	2.74984e-10	ACTBL2
483	chr5	57312239	57312566	328	*	81	10769	ENSG00000145632	8444.08	-0.457675	0.000100461	PLK2
484	chr5	58422841	58423809	969	*	82	5144	ENSG00000113448	2698.71	-1.94969	4.98237e-24	PDE4D
485	chr5	59086266	59086604	339	*	15	5144	ENSG00000113448	2698.71	-1.94969	4.98237e-24	PDE4D
486	chr5	60597535	60597796	262	*	124	57688	ENSG00000130449	1861.15	0.426135	2.30264e-06	ZSWIM6
487	chr5	60746113	60746445	333	*	76	57688	ENSG00000130449	1861.15	0.426135	2.30264e-06	ZSWIM6
488	chr5	66539951	66540268	318	*	20	4064	ENSG00000134061	81.6219	-5.17775	7.86849e-17	CD180
489	chr5	66563843	66564454	612	*	52	4064	ENSG00000134061	81.6219	-5.17775	7.86849e-17	CD180
490	chr5	67729695	67730150	456	*	61	5295	ENSG00000145675	4595.72	-1.97763	5.59764e-69	PIK3R1
491	chr5	68797782	68798216	435	*	126	100506658	ENSG00000197822	724.086	2.63622	9.49025e-34	OCLN
492	chr5	71475069	71475701	633	*	113	4131	ENSG00000131711	20810.4	0.746524	0.000232617	MAP1B
493	chr5	73234342	73234911	570	*	178	64283	ENSG00000214944	3310.08	1.91048	1.51621e-34	ARHGEF28
494	chr5	92414022	92414405	384	*	36	441094	ENSG00000237187	377.042	-1.60871	3.32135e-22	NR2F1-AS1
495	chr5	92695060	92695597	538	*	118	441094	ENSG00000237187	377.042	-1.60871	3.32135e-22	NR2F1-AS1
496	chr5	95048073	95048748	676	*	57	22836	ENSG00000164292	58008.2	1.07945	2.11304e-15	RHOBTB3
497	chr5	95590853	95591421	569	*	111	5122	ENSG00000175426	1402.59	-3.12362	4.26138e-53	PCSK1
498	chr5	109496359	109496704	346	*	37	642987	ENSG00000186952	61.9518	-0.788433	0.0116554	TMEM232
499	chr5	111016339	111016604	266	*	154	9315	ENSG00000134986	12921.8	-2.31527	5.49912e-26	NREP
500	chr5	122188300	122188599	300	*	15	28966	ENSG00000064652	1531.4	0.785184	1.98958e-11	SNX24
501	chr5	123996222	123997206	985	*	164	57507	ENSG00000168916	2639.52	-0.596428	1.6155e-09	ZNF608
502	chr5	124379437	124380387	951	*	390	57507	ENSG00000168916	2639.52	-0.596428	1.6155e-09	ZNF608
503	chr5	125690129	125690443	315	*	51	65983	ENSG00000155324	728.638	0.806851	1.29025e-05	GRAMD2B
504	chr5	130971229	130971873	645	*	18	51735	ENSG00000158987	3147.19	-0.428639	0.00861566	RAPGEF6
505	chr5	131724146	131724537	392	*	104	6584	ENSG00000197375	1353.72	0.848112	5.86632e-15	SLC22A5
506	chr5	135329471	135329793	323	*	37	7045	ENSG00000120708	26371.5	0.389658	0.00284897	TGFBI
507	chr5	135347543	135348276	734	*	47	7045	ENSG00000120708	26371.5	0.389658	0.00284897	TGFBI
508	chr5	135393248	135394350	1103	*	292	7045	ENSG00000120708	26371.5	0.389658	0.00284897	TGFBI
509	chr5	149318184	149318575	392	*	23	5145	ENSG00000132915	35.9032	1.71407	5.83948e-07	PDE6A
510	chr5	150016653	150017378	726	*	89	11346	ENSG00000171992	2426.23	1.33097	5.06395e-31	SYNPO
511	chr5	150024418	150024971	554	*	93	11346	ENSG00000171992	2426.23	1.33097	5.06395e-31	SYNPO
512	chr5	153747565	153748260	696	*	111	55568	ENSG00000164574	5382.63	0.386926	0.000240713	GALNT10
513	chr5	156717240	156717707	468	*	63	26999	ENSG00000055163	654.882	2.33077	3.37965e-22	CYFIP2
514	chr5	159510283	159510830	548	*	87	114825	ENSG00000170234	1799.66	-0.22682	0.0343295	PWWP2A
515	chr5	161616955	161617227	273	*	23	2566	ENSG00000113327	26.9631	-1.13457	0.0211574	GABRG2
516	chr5	162886932	162887286	355	*	23	134492	ENSG00000170584	2588.16	0.228541	0.0287165	NUDCD2
517	chr5	174715190	174715507	318	*	77	1812	ENSG00000184845	26.4566	1.36107	0.00717294	DRD1
518	chr6	4582105	4582582	478	*	120	9425	ENSG00000153046	1827.43	0.398024	0.000551595	CDYL
519	chr6	16769689	16770169	481	*	45	6310	ENSG00000124788	3041.29	-0.947734	2.03517e-22	ATXN1
520	chr6	30712449	30712855	407	*	52	8870	ENSG00000137331	2184.94	0.643326	2.08743e-06	IER3
521	chr6	30811884	30812556	673	*	77	780	ENSG00000204580	3398.2	0.286002	0.0378324	DDR1
522	chr6	34203148	34203491	344	*	95	3159	ENSG00000137309	9467.27	2.41355	1.59045e-77	HMGA1
523	chr6	37093895	37094450	556	*	104	5292	ENSG00000137193	1122.78	2.74793	5.91275e-44	PIM1
524	chr6	37105305	37105858	554	*	77	5292	ENSG00000137193	1122.78	2.74793	5.91275e-44	PIM1
525	chr6	45413507	45414146	640	*	252	860	ENSG00000124813	681.129	0.904435	4.1047e-09	RUNX2
526	chr6	74289898	74290319	422	*	104	26503	ENSG00000119899	973.125	0.542954	0.00107898	SLC17A5
527	chr6	74295491	74296051	561	*	77	26503	ENSG00000119899	973.125	0.542954	0.00107898	SLC17A5
528	chr6	75915126	75915419	294	*	19	1303	ENSG00000111799	7146.72	3.91449	2.64314e-196	COL12A1
529	chr6	75915687	75915967	281	*	18	1303	ENSG00000111799	7146.72	3.91449	2.64314e-196	COL12A1
530	chr6	76027250	76027550	301	*	37	27145	ENSG00000118407	45.8163	1.79749	2.56095e-10	FILIP1
531	chr6	86113030	86114258	1229	*	45	4907	ENSG00000135318	5643.19	0.848972	4.85814e-07	NT5E
532	chr6	86388763	86389022	260	*	52	387066	ENSG00000203875	2995.96	0.630921	1.26689e-07	SNHG5
533	chr6	90927742	90928211	470	*	133	60468	ENSG00000112182	445.984	-0.422282	0.0192973	BACH2
534	chr6	91005482	91005836	355	*	30	60468	ENSG00000112182	445.984	-0.422282	0.0192973	BACH2
535	chr6	99419064	99419410	347	*	17	26235	ENSG00000112234	893.342	-0.419913	0.000462554	FBXL4
536	chr6	119027409	119027695	287	*	23	387119	ENSG00000111860	295.648	-0.975434	4.91592e-05	CEP85L
537	chr6	132272297	132273024	728	*	385	1490	ENSG00000118523	8122.71	4.57217	6.20686e-123	CCN2
538	chr6	157469879	157470346	468	*	69	57492	ENSG00000049618	3578.15	-0.302279	7.10656e-08	ARID1B
539	chr6	158402258	158402799	542	*	174	8871	ENSG00000078269	2575.01	0.338964	0.00915379	SYNJ2
540	chr7	500185	500446	262	*	37	5154	ENSG00000197461	1396.48	1.25852	1.31614e-18	PDGFA
541	chr7	500861	501374	514	*	297	5154	ENSG00000197461	1396.48	1.25852	1.31614e-18	PDGFA
542	chr7	1576493	1577559	1067	*	394	7975	ENSG00000198517	1886.64	1.61158	2.44618e-48	MAFK
543	chr7	2215151	2215523	373	*	130	8379	ENSG00000002822	2125.82	0.620672	2.65402e-10	MAD1L1
544	chr7	2348700	2350144	1445	*	412	29886	ENSG00000106266	3274.67	0.837604	2.73311e-09	SNX8
545	chr7	3988324	3989052	729	*	138	221935	ENSG00000146555	1217.64	1.05097	1.20872e-14	SDK1
546	chr7	5631069	5631877	809	*	425	6624	ENSG00000075618	13820.4	0.698811	3.52713e-07	FSCN1
547	chr7	5813226	5813825	600	*	30	54476	ENSG00000011275	6139.99	0.312206	4.19111e-06	RNF216
548	chr7	6322698	6323466	769	*	149	9265	ENSG00000008256	8882.57	1.71497	2.69269e-114	CYTH3
549	chr7	23373716	23374140	425	*	23	10643	ENSG00000136231	3445.07	0.331743	0.00182924	IGF2BP3
550	chr7	27135175	27135707	533	*	160	3198	ENSG00000105991	545.361	0.839148	2.13995e-13	HOXA1
551	chr7	29762982	29763513	532	*	52	442524	ENSG00000227855	201.815	0.792722	0.00229777	DPY19L2P3
552	chr7	30027444	30028753	1310	*	98	9805	ENSG00000136193	19372.3	0.816428	1.92258e-30	SCRN1
553	chr7	30805396	30805765	370	*	11	84182	ENSG00000106125	770.568	-0.655953	4.0841e-10	MINDY4
554	chr7	32996897	32997393	497	*	74	11328	ENSG00000122642	12757.9	1.12231	4.37142e-40	FKBP9
555	chr7	33756017	33756425	409	*	17	168667	ENSG00000164619	162.733	0.958372	0.0212939	BMPER
556	chr7	35840996	35841294	299	*	23	989	ENSG00000122545	8237.37	-0.587656	0.00485503	2020-09-07
557	chr7	36087542	36088137	596	*	48	80820	ENSG00000122547	580.632	-0.726405	0.000167383	EEPD1
558	chr7	36428631	36429056	426	*	20	54443	ENSG00000011426	11414.7	0.855314	0.000102069	ANLN
559	chr7	39773417	39773784	368	*	100	349114	ENSG00000188185	516.046	-0.393566	0.00744896	LINC00265
560	chr7	41067410	41067749	340	*	33	79783	ENSG00000175600	319.548	0.871727	4.40095e-06	SUGCT
561	chr7	42533048	42533614	567	*	29	2737	ENSG00000106571	3529.67	-0.551298	1.49221e-06	GLI3
562	chr7	43921821	43922187	367	*	36	55665	ENSG00000106608	3502.05	0.632416	2.08119e-09	URGCP
563	chr7	47521973	47522485	513	*	28	64759	ENSG00000136205	16971.9	0.918192	3.17136e-15	TNS3
564	chr7	47618572	47619039	468	*	35	64759	ENSG00000136205	16971.9	0.918192	3.17136e-15	TNS3
565	chr7	47619710	47619991	282	*	47	64759	ENSG00000136205	16971.9	0.918192	3.17136e-15	TNS3
566	chr7	47644438	47644824	387	*	193	64759	ENSG00000136205	16971.9	0.918192	3.17136e-15	TNS3
567	chr7	47823274	47824126	853	*	80	80099	ENSG00000136275	6.78884	3.80616	0.000262653	C7orf69
568	chr7	47826043	47826981	939	*	251	80099	ENSG00000136275	6.78884	3.80616	0.000262653	C7orf69
569	chr7	48123033	48123377	345	*	26	7378	ENSG00000183696	3542.44	2.12536	2.08286e-26	UPP1
570	chr7	66056857	66057377	521	*	76	493754	ENSG00000229180	380.027	-0.284169	0.049222	AC006001.3
571	chr7	66119560	66119997	438	*	52	27342	ENSG00000154710	2589.47	-0.188625	0.0298338	RABGEF1
572	chr7	68164229	68164599	371	*	37	26053	ENSG00000158321	1479.63	-1.08961	2.40085e-15	AUTS2
573	chr7	68428485	68429035	551	*	61	26053	ENSG00000158321	1479.63	-1.08961	2.40085e-15	AUTS2
574	chr7	73895574	73895864	291	*	114	9569	ENSG00000006704	2131.86	0.742954	6.037e-08	GTF2IRD1
575	chr7	73896804	73898105	1302	*	77	9569	ENSG00000006704	2131.86	0.742954	6.037e-08	GTF2IRD1
576	chr7	74066702	74066976	275	*	16	2969	ENSG00000263001	19621.1	-0.630247	3.04345e-12	GTF2I
577	chr7	75849398	75849763	366	*	45	222183	ENSG00000177679	406.181	0.808693	4.88335e-08	SRRM3
578	chr7	75987692	75987968	277	*	36	7532	ENSG00000170027	14946	0.34856	9.93701e-09	YWHAG
579	chr7	76052654	76052980	327	*	52	7784	ENSG00000188372	653.848	0.885843	7.02852e-09	ZP3
580	chr7	90254986	90255560	575	*	174	5218	ENSG00000058091	3306	0.540645	2.13712e-07	CDK14
581	chr7	92324853	92325376	524	*	102	257415	ENSG00000234545	963.406	-0.364513	0.0231383	FAM133B
582	chr7	92327440	92328167	728	*	114	257415	ENSG00000234545	963.406	-0.364513	0.0231383	FAM133B
583	chr7	93543595	93544227	633	*	38	2791	ENSG00000127920	5111.31	0.936478	9.98614e-15	GNG11
584	chr7	93577012	93577341	330	*	11	2791	ENSG00000127920	5111.31	0.936478	9.98614e-15	GNG11
585	chr7	100463203	100464075	873	*	53	7205	ENSG00000087077	1891.93	1.30666	3.65497e-23	TRIP6
586	chr7	100760671	100760984	314	*	120	5054	ENSG00000106366	2089.77	2.87992	1.29909e-69	SERPINE1
587	chr7	100765346	100765637	292	*	46	5054	ENSG00000106366	2089.77	2.87992	1.29909e-69	SERPINE1
588	chr7	101000819	101001099	281	*	60	136227	ENSG00000160963	362.579	0.926517	3.45994e-09	COL26A1
589	chr7	101045057	101046005	949	*	230	136227	ENSG00000160963	362.579	0.926517	3.45994e-09	COL26A1
590	chr7	106358737	106359081	345	*	53	168455	ENSG00000253276	1297.79	0.81889	3.08255e-10	CCDC71L
591	chr7	107731824	107732430	607	*	23	22798	ENSG00000091128	116.101	1.3416	2.27081e-07	LAMB4
592	chr7	115994461	115995253	793	*	218	858	ENSG00000105971	2124.49	1.9942	3.30653e-61	CAV2
593	chr7	116151772	116153031	1260	*	67	858	ENSG00000105971	2124.49	1.9942	3.30653e-61	CAV2
594	chr7	116165247	116165638	392	*	38	857	ENSG00000105974	23107.4	2.21174	4.5608e-73	CAV1
595	chr7	129609830	129610365	536	*	61	7328	ENSG00000186591	13961.7	0.427879	1.21632e-13	UBE2H
596	chr7	129934234	129934492	259	*	19	51200	ENSG00000128510	8124.8	6.1694	0	CPA4
597	chr7	130070754	130071032	279	*	39	95681	ENSG00000106477	1707.76	0.239686	0.0395488	CEP41
598	chr7	131546885	131547278	394	*	70	91584	ENSG00000221866	515.422	-2.89821	4.73934e-33	PLXNA4
599	chr7	138575623	138575983	361	*	45	57670	ENSG00000122778	2899.37	-0.319774	2.22912e-05	KIAA1549
600	chr7	140325921	140326646	726	*	222	27147	ENSG00000146966	3519.22	1.48863	1.2766e-31	DENND2A
601	chr7	141062494	141062872	379	*	97	55750	ENSG00000006530	2711.5	0.191962	0.0363706	AGK
602	chr7	150008900	150009212	313	*	51	65999	ENSG00000127399	24.3344	1.41628	0.00424278	LRRC61
603	chr7	150009673	150010046	374	*	26	65999	ENSG00000127399	24.3344	1.41628	0.00424278	LRRC61
604	chr7	150065922	150066506	585	*	50	29803	ENSG00000214022	8966.94	0.797629	5.92046e-28	REPIN1
605	chr7	151217693	151217966	274	*	45	6009	ENSG00000106615	6449.63	0.810436	1.48355e-44	RHEB
606	chr7	151384460	151385166	707	*	265	51422	ENSG00000106617	1255.56	2.12948	3.13361e-57	PRKAG2
607	chr7	151451083	151451720	638	*	649	51422	ENSG00000106617	1255.56	2.12948	3.13361e-57	PRKAG2
608	chr7	157102105	157102943	839	*	97	10049	ENSG00000105993	11954.6	0.842051	7.16932e-36	DNAJB6
609	chr8	1771745	1772089	345	*	45	9639	ENSG00000104728	3349.75	0.981261	1.48411e-20	ARHGEF10
610	chr8	6451629	6452008	380	*	60	285	ENSG00000091879	85.4312	-2.63582	1.09424e-14	ANGPT2
611	chr8	11368114	11368472	359	*	23	640	ENSG00000136573	325.341	1.22356	3.33033e-09	BLK
612	chr8	11748677	11748955	279	*	23	1508	ENSG00000164733	51746.6	1.06012	2.2999e-16	CTSB
613	chr8	13051438	13051855	418	*	77	10395	ENSG00000164741	8727.15	0.962948	4.64805e-54	DLC1
614	chr8	13224167	13224555	389	*	174	10395	ENSG00000164741	8727.15	0.962948	4.64805e-54	DLC1
615	chr8	17533644	17533914	271	*	45	57509	ENSG00000129422	3968.75	-0.897266	1.53871e-20	MTUS1
616	chr8	18523702	18524358	657	*	86	23362	ENSG00000156011	2830.35	-1.04071	3.31728e-20	PSD3
617	chr8	18577622	18577889	268	*	76	23362	ENSG00000156011	2830.35	-1.04071	3.31728e-20	PSD3
618	chr8	22454683	22455558	876	*	683	541565	ENSG00000241852	1572.62	0.701178	1.38059e-05	C8orf58
619	chr8	23571892	23572451	560	*	60	137814	ENSG00000180053	293.123	-0.409231	0.0255965	NKX2-6
620	chr8	27471827	27472407	581	*	54	1191	ENSG00000120885	7930.29	1.64291	1.23547e-41	CLU
621	chr8	27862149	27862489	341	*	123	286133	ENSG00000168079	29.2364	-2.95306	1.71607e-06	SCARA5
622	chr8	29877616	29877918	303	*	45	51669	ENSG00000133872	7191.11	-0.233681	0.00103012	SARAF
623	chr8	37000279	37000782	504	*	17	157855	ENSG00000215262	6.1493	3.68825	0.0377259	KCNU1
624	chr8	37002190	37002479	290	*	36	157855	ENSG00000215262	6.1493	3.68825	0.0377259	KCNU1
625	chr8	37378906	37379175	270	*	52	80139	ENSG00000183779	2016.92	0.457198	0.000113572	ZNF703
626	chr8	37659128	37659509	382	*	57	25960	ENSG00000020181	6548.88	0.350127	0.000240442	ADGRA2
627	chr8	38857155	38857665	511	*	23	8754	ENSG00000168615	9482.94	0.426628	0.0171881	ADAM9
628	chr8	67434445	67434904	460	*	25	254778	ENSG00000169085	179.482	1.7862	1.13877e-16	VXN
629	chr8	87520578	87520848	271	*	45	51115	ENSG00000176623	2329.18	-0.337582	0.000254886	RMDN1
630	chr8	101800788	101801622	835	*	49	26986	ENSG00000070756	53608.1	0.495212	2.3516e-07	PABPC1
631	chr8	102063535	102063910	376	*	114	441374	ENSG00000248599	5.2134	4.77423	0.00233523	AC018781.1
632	chr8	107072179	107072635	457	*	30	55074	ENSG00000164830	901.523	-0.598421	4.38883e-05	OXR1
633	chr8	118662650	118662928	279	*	56	90390	ENSG00000164758	472.53	0.485629	5.19734e-06	MED30
634	chr8	119214273	119214617	345	*	37	2131	ENSG00000182197	6550.5	1.20749	9.86248e-22	EXT1
635	chr8	119221383	119221775	393	*	60	2131	ENSG00000182197	6550.5	1.20749	9.86248e-22	EXT1
636	chr8	128866269	128866857	589	*	32	5820	ENSG00000249859	340.497	0.872604	9.44075e-05	PVT1
637	chr8	128919590	128920372	783	*	102	5820	ENSG00000249859	340.497	0.872604	9.44075e-05	PVT1
638	chr8	131154432	131154696	265	*	23	50807	ENSG00000153317	7407.4	1.00446	1.98983e-23	ASAP1
639	chr8	142164055	142164415	361	*	101	22898	ENSG00000105339	1469.52	1.13355	1.75446e-30	DENND3
640	chr8	143757658	143758007	350	*	96	8000	ENSG00000167653	27.2928	2.59994	1.31303e-07	PSCA
641	chr8	144097296	144097653	358	*	60	100133669	ENSG00000247317	189.854	0.961102	1.76694e-07	LY6E-DT
642	chr8	144120539	144120934	396	*	21	286122	ENSG00000177335	287.763	-1.04951	1.58952e-09	C8orf31
643	chr8	145014188	145014897	710	*	107	5339	ENSG00000178209	19438.9	0.527868	5.68067e-07	PLEC
644	chr9	707011	707400	390	*	58	23189	ENSG00000107104	4383.02	0.188997	0.026601	KANK1
645	chr9	5509461	5509868	408	*	22	80380	ENSG00000197646	137.941	1.41465	1.12011e-07	PDCD1LG2
646	chr9	35518166	35518583	418	*	196	9853	ENSG00000198853	2608.47	1.40353	2.29956e-65	RUSC2
647	chr9	35907883	35908233	351	*	42	158376	ENSG00000235387	28.0798	1.06921	0.00815079	SPAAR
648	chr9	73034611	73034989	379	*	77	687	ENSG00000119138	1741.78	0.461335	8.06867e-05	KLF9
649	chr9	73169044	73169380	337	*	67	687	ENSG00000119138	1741.78	0.461335	8.06867e-05	KLF9
650	chr9	75169179	75169690	512	*	53	117531	ENSG00000165091	14.9086	-2.32472	0.00109898	TMC1
651	chr9	78987063	78987379	317	*	37	55312	ENSG00000135002	851.805	0.842902	4.4939e-06	RFK
652	chr9	80129858	80130639	782	*	252	9630	ENSG00000156049	109.088	-2.95219	7.37704e-22	GNA14
653	chr9	84174793	84175055	263	*	24	7088	ENSG00000196781	2878.69	-0.434228	0.00268987	TLE1
654	chr9	89990731	89991127	397	*	41	1612	ENSG00000196730	5388.26	0.946049	1.8255e-39	DAPK1
655	chr9	91149434	91150423	990	*	185	158046	ENSG00000130045	101.711	1.10672	8.28883e-08	NXNL2
656	chr9	97675333	97675718	386	*	27	84909	ENSG00000148120	1301.87	1.19565	1.71889e-33	C9orf3
657	chr9	97684284	97685128	845	*	93	84909	ENSG00000148120	1301.87	1.19565	1.71889e-33	C9orf3
658	chr9	98269647	98270217	571	*	37	5727	ENSG00000185920	1620.68	2.0031	1.34294e-34	PTCH1
659	chr9	100639252	100639765	514	*	60	2304	ENSG00000178919	349.402	2.32086	1.18373e-37	FOXE1
660	chr9	100893014	100893273	260	*	10	7464	ENSG00000106789	1356.44	-0.399022	2.18429e-06	CORO2A
661	chr9	100985598	100985883	286	*	67	55357	ENSG00000095383	462.515	1.63922	1.29379e-26	TBC1D2
662	chr9	103110905	103111182	278	*	30	54881	ENSG00000136891	3490.27	-0.363936	2.95271e-11	TEX10
663	chr9	109679615	109679892	278	*	37	58499	ENSG00000148143	2159.21	-0.739221	2.15309e-16	ZNF462
664	chr9	116372433	116372744	312	*	36	5998	ENSG00000138835	2410.1	0.321411	0.0225942	RGS3
665	chr9	116382853	116383559	707	*	85	5998	ENSG00000138835	2410.1	0.321411	0.0225942	RGS3
666	chr9	116939571	116939897	327	*	37	85301	ENSG00000196739	4166.31	-0.740579	5.35954e-11	COL27A1
667	chr9	124113550	124113911	362	*	50	2040	ENSG00000148175	8123.48	-0.238975	0.00399674	STOM
668	chr9	127042288	127042783	496	*	28	10783	ENSG00000119408	8959.61	0.911297	3.23506e-18	NEK6
669	chr9	127048011	127048705	695	*	28	10783	ENSG00000119408	8959.61	0.911297	3.23506e-18	NEK6
670	chr9	127059621	127060063	443	*	192	10783	ENSG00000119408	8959.61	0.911297	3.23506e-18	NEK6
671	chr9	127071709	127072485	777	*	91	10783	ENSG00000119408	8959.61	0.911297	3.23506e-18	NEK6
672	chr9	130860793	130861640	848	*	98	114789	ENSG00000148339	1315.68	0.374604	9.33321e-07	SLC25A25
673	chr9	131314982	131315253	272	*	30	6709	ENSG00000197694	27548.3	1.01774	1.12633e-46	SPTAN1
674	chr9	131316389	131317843	1455	*	255	6709	ENSG00000197694	27548.3	1.01774	1.12633e-46	SPTAN1
675	chr9	131320799	131321311	513	*	93	6709	ENSG00000197694	27548.3	1.01774	1.12633e-46	SPTAN1
676	chr9	131988204	131988566	363	*	46	389792	ENSG00000188483	924.175	0.466619	0.0178238	IER5L
677	chr9	132319341	132319928	588	*	60	100506190	ENSG00000204054	2907.81	0.470267	9.22693e-05	LINC00963
678	chr9	132945366	132945762	397	*	93	23413	ENSG00000107130	3791.74	0.342412	0.00020746	NCS1
679	chr9	134483402	134483665	264	*	32	2889	ENSG00000107263	4833.33	0.917302	2.78333e-23	RAPGEF1
680	chr9	134483975	134484312	338	*	168	2889	ENSG00000107263	4833.33	0.917302	2.78333e-23	RAPGEF1
681	chr9	134609440	134609876	437	*	96	2889	ENSG00000107263	4833.33	0.917302	2.78333e-23	RAPGEF1
682	chr9	136579908	136580245	338	*	62	1757	ENSG00000123453	781.349	-0.313158	0.0428901	SARDH
683	chr9	137409818	137410210	393	*	21	6256	ENSG00000186350	6547.24	-0.412632	0.000456905	RXRA
684	chr9	137494456	137494750	295	*	183	1289	ENSG00000130635	25458.7	0.872895	5.90094e-19	COL5A1
685	chr9	140306252	140306592	341	*	81	54932	ENSG00000187609	412.431	0.601449	5.44096e-07	EXD3
686	chrX	68209948	68210316	369	*	30	1947	ENSG00000090776	5451.42	-0.452486	0.000986962	EFNB1
687	chrX	128800119	128800525	407	*	45	8862	ENSG00000171388	612.381	1.98757	2.27901e-14	APLN
688	chrX	133738181	133738449	269	*	60	10761	ENSG00000170965	82.0856	2.602	1.62175e-24	PLAC1
689	chrX	133803948	133804345	398	*	45	10761	ENSG00000170965	82.0856	2.602	1.62175e-24	PLAC1
690	chrX	135296457	135297045	589	*	196	2273	ENSG00000022267	18557.6	0.968986	3.32599e-41	FHL1
691	chrX	139805527	139805829	303	*	86	286411	ENSG00000203930	86.5282	1.3483	1.23298e-06	LINC00632
692	chrX	152066053	152066588	536	*	557	7739	ENSG00000147394	2431.65	2.90515	3.22014e-164	ZNF185
693	chrX	153597502	153597835	334	*	52	2316	ENSG00000196924	161615	1.56661	2.03634e-71	FLNA

## Sheet: YAP-TFE3_ChIP_RNAseq_merged
	seqnames	start	end	width	strand	V5	geneId	ENSEMBL	baseMean	log2 Fold Change	padj	Gene
1	chr1	15298307	15298697	391	*	86	23254	ENSG00000189337	2090.46	1.81956	6.02288e-90	KAZN
2	chr1	16470691	16473814	3124	*	143	1969	ENSG00000142627	5020.24	1.0641	1.06486e-18	EPHA2
3	chr1	16500171	16500446	276	*	130	1969	ENSG00000142627	5020.24	1.0641	1.06486e-18	EPHA2
4	chr1	85666871	85668161	1291	*	392	84144	ENSG00000097096	235.87	1.59824	1.14848e-11	SYDE2
5	chr1	86045969	86047024	1056	*	462	3491	ENSG00000142871	10596.6	1.74081	1.10732e-52	CCN1
6	chr1	86072754	86073248	495	*	69	3491	ENSG00000142871	10596.6	1.74081	1.10732e-52	CCN1
7	chr1	86078137	86078727	591	*	45	3491	ENSG00000142871	10596.6	1.74081	1.10732e-52	CCN1
8	chr1	152080915	152081601	687	*	60	7062	ENSG00000159450	60.1409	4.47014	8.25503e-41	TCHH
9	chr10	92690523	92691144	622	*	115	27063	ENSG00000148677	2371.13	2.92211	6.94883e-11	ANKRD1
10	chr10	95048585	95049037	453	*	164	26509	ENSG00000138119	15695.7	2.02564	7.55805e-60	MYOF
11	chr10	95218439	95218982	544	*	30	26509	ENSG00000138119	15695.7	2.02564	7.55805e-60	MYOF
12	chr10	99447240	99447501	262	*	52	60370	ENSG00000119986	366.804	1.35943	1.7189e-19	AVPI1
13	chr10	112170369	112170880	512	*	18	1847	ENSG00000138166	787.259	1.30294	2.79513e-10	DUSP5
14	chr11	11371436	11371752	317	*	87	283106	ENSG00000254598	12.6944	2.06937	0.0133577	CSNK2A3
15	chr11	12065501	12065883	383	*	159	27122	ENSG00000050165	22309.3	1.09398	2.02586e-19	DKK3
16	chr11	12398728	12399341	614	*	444	55742	ENSG00000197702	12811.8	1.12532	3.15549e-111	PARVA
17	chr11	12439588	12440294	707	*	39	55742	ENSG00000197702	12811.8	1.12532	3.15549e-111	PARVA
18	chr11	12578393	12578738	346	*	142	7003	ENSG00000187079	10940	1.18737	1.63918e-16	TEAD1
19	chr11	12695648	12696339	692	*	554	7003	ENSG00000187079	10940	1.18737	1.63918e-16	TEAD1
20	chr11	12824088	12824355	268	*	45	7003	ENSG00000187079	10940	1.18737	1.63918e-16	TEAD1
21	chr11	12915216	12915827	612	*	37	7003	ENSG00000187079	10940	1.18737	1.63918e-16	TEAD1
22	chr11	14443839	14444215	377	*	191	22800	ENSG00000133818	2136.44	1.28594	2.99872e-41	RRAS2
23	chr11	44009067	44009525	459	*	37	387763	ENSG00000187479	147.521	1.07893	5.41775e-09	C11orf96
24	chr11	69311795	69312508	714	*	340	595	ENSG00000110092	9113.41	1.0782	2.54583e-13	CCND1
25	chr11	69451331	69451765	435	*	287	595	ENSG00000110092	9113.41	1.0782	2.54583e-13	CCND1
26	chr11	114033451	114033746	296	*	60	4837	ENSG00000166741	7823.23	1.11263	1.4301e-08	NNMT
27	chr11	114163101	114163752	652	*	40	4837	ENSG00000166741	7823.23	1.11263	1.4301e-08	NNMT
28	chr11	114165660	114166745	1086	*	215	4837	ENSG00000166741	7823.23	1.11263	1.4301e-08	NNMT
29	chr11	114178170	114178516	347	*	58	4837	ENSG00000166741	7823.23	1.11263	1.4301e-08	NNMT
30	chr11	116064234	116064588	355	*	38	283143	ENSG00000246100	27.3923	2.43779	1.29925e-05	LINC00900
31	chr11	121337186	121337565	380	*	52	6653	ENSG00000137642	4958.87	1.53633	1.21856e-34	SORL1
32	chr12	1714807	1715268	462	*	52	81029	ENSG00000111186	481.159	1.66851	2.85895e-18	WNT5B
33	chr12	8122893	8123555	663	*	347	6515	ENSG00000059804	3270.07	2.16829	7.51842e-23	SLC2A3
34	chr12	52585646	52586238	593	*	174	144501	ENSG00000167767	1730.68	3.07502	1.8546e-42	KRT80
35	chr12	52674686	52675158	473	*	196	3892	ENSG00000170442	789.172	1.01137	2.63327e-06	KRT86
36	chr12	56614848	56615309	462	*	30	10193	ENSG00000181852	3274.28	1.44473	2.65072e-17	RNF41
37	chr12	65672464	65672880	417	*	23	253827	ENSG00000174099	1780.2	1.55656	3.11367e-42	MSRB3
38	chr12	98884556	98884886	331	*	23	643770	ENSG00000245017	7.06465	1.93139	0.0144542	LINC02453
39	chr12	104612982	104613669	688	*	77	7296	ENSG00000198431	33083.7	2.00003	2.57862e-28	TXNRD1
40	chr12	120524622	120524935	314	*	95	92558	ENSG00000135127	37.5426	2.74285	3.52243e-08	BICDL1
41	chr13	21635103	21635912	810	*	361	26524	ENSG00000150457	922.068	1.85623	2.4419e-64	LATS2
42	chr13	78549376	78549892	517	*	33	1910	ENSG00000136160	780.204	2.0823	9.88688e-55	EDNRB
43	chr13	97774389	97775392	1004	*	60	10150	ENSG00000139793	5478.88	1.23143	3.15666e-09	MBNL2
44	chr13	97845914	97847006	1093	*	94	10150	ENSG00000139793	5478.88	1.23143	3.15666e-09	MBNL2
45	chr13	97874681	97876342	1662	*	25	10150	ENSG00000139793	5478.88	1.23143	3.15666e-09	MBNL2
46	chr13	97908526	97908826	301	*	22	10150	ENSG00000139793	5478.88	1.23143	3.15666e-09	MBNL2
47	chr13	97910015	97911140	1126	*	44	10150	ENSG00000139793	5478.88	1.23143	3.15666e-09	MBNL2
48	chr13	97927088	97927361	274	*	67	10150	ENSG00000139793	5478.88	1.23143	3.15666e-09	MBNL2
49	chr13	97959831	97961450	1620	*	345	10150	ENSG00000139793	5478.88	1.23143	3.15666e-09	MBNL2
50	chr13	97980281	97980794	514	*	65	10150	ENSG00000139793	5478.88	1.23143	3.15666e-09	MBNL2
51	chr13	102108183	102108524	342	*	53	9358	ENSG00000198542	61.5858	1.36026	0.00144724	ITGBL1
52	chr13	102164992	102165294	303	*	22	9358	ENSG00000198542	61.5858	1.36026	0.00144724	ITGBL1
53	chr14	23082912	23083540	629	*	130	63874	ENSG00000100439	4610.11	1.14386	1.36226e-20	ABHD4
54	chr14	23449613	23450968	1356	*	1429	84962	ENSG00000129474	9629.72	2.41295	1.0403e-45	AJUBA
55	chr14	23451833	23452477	645	*	885	84962	ENSG00000129474	9629.72	2.41295	1.0403e-45	AJUBA
56	chr14	55031972	55032386	415	*	12	23034	ENSG00000020577	2581.58	1.57395	2.48301e-36	SAMD4A
57	chr14	55118581	55119512	932	*	311	23034	ENSG00000020577	2581.58	1.57395	2.48301e-36	SAMD4A
58	chr14	55240189	55240475	287	*	52	23034	ENSG00000020577	2581.58	1.57395	2.48301e-36	SAMD4A
59	chr14	75761947	75762206	260	*	15	731223	ENSG00000259687	13.8709	2.19645	0.0117528	LINC01220
60	chr14	89021184	89021544	361	*	104	11099	ENSG00000070778	1232.53	1.37575	3.73466e-47	AL162171.1
61	chr14	103576347	103576719	373	*	30	91828	ENSG00000205436	86.6363	1.26196	1.01755e-10	EXOC3L4
62	chr15	63268526	63269190	665	*	60	7168	ENSG00000140416	23789.7	1.33658	1.10364e-35	TPM1
63	chr15	63337020	63337462	443	*	96	7168	ENSG00000140416	23789.7	1.33658	1.10364e-35	TPM1
64	chr15	79296668	79296972	305	*	60	5923	ENSG00000058335	134.707	2.4594	1.98978e-16	RASGRF1
65	chr15	83478872	83479421	550	*	23	123720	ENSG00000156232	724.845	1.51438	2.74764e-31	WHAMM
66	chr15	83989428	83989742	315	*	12	646	ENSG00000169594	1562.45	1.22649	4.96868e-09	BNC1
67	chr16	122632	123022	391	*	105	64285	ENSG00000007384	1735.66	1.04403	5.26164e-21	RHBDF1
68	chr16	3070424	3071127	704	*	69	51330	ENSG00000006327	3033.22	2.9364	7.06861e-85	TNFRSF12A
69	chr16	3071665	3072737	1073	*	174	51330	ENSG00000006327	3033.22	2.9364	7.06861e-85	TNFRSF12A
70	chr16	23916392	23916936	545	*	139	5579	ENSG00000166501	1065.83	2.33877	3.79281e-45	PRKCB
71	chr16	68741230	68741915	686	*	484	999	ENSG00000039068	23.8792	1.70367	0.0289282	CDH1
72	chr16	68824045	68824395	351	*	36	999	ENSG00000039068	23.8792	1.70367	0.0289282	CDH1
73	chr16	71663055	71663326	272	*	30	91862	ENSG00000140832	105.416	1.33582	2.9372e-10	MARVELD3
74	chr16	77953028	77953311	284	*	17	10143	ENSG00000166509	27.2141	4.85041	2.99821e-15	CLEC3A
75	chr16	88365647	88366127	481	*	146	84627	ENSG00000225614	430.187	1.28629	4.48506e-11	ZNF469
76	chr17	783017	783542	526	*	93	64359	ENSG00000167693	1791.1	1.52729	1.99838e-37	NXN
77	chr17	836637	836916	280	*	174	64359	ENSG00000167693	1791.1	1.52729	1.99838e-37	NXN
78	chr17	854803	855462	660	*	261	64359	ENSG00000167693	1791.1	1.52729	1.99838e-37	NXN
79	chr17	3571288	3571708	421	*	120	30851	ENSG00000213977	4806.33	1.03262	3.28198e-17	TAX1BP3
80	chr17	47913737	47914249	513	*	52	729220	ENSG00000204584	22.0443	1.29034	0.0199686	FLJ45513
81	chr17	76349080	76349568	489	*	287	9021	ENSG00000184557	897.818	1.11022	5.69468e-05	SOCS3
82	chr17	81066619	81067385	767	*	152	284207	ENSG00000176845	538.626	1.78922	3.0371e-32	METRNL
83	chr18	3623983	3624832	850	*	143	649446	ENSG00000177337	142.86	1.18298	1.64889e-09	DLGAP1-AS1
84	chr18	56251878	56252268	391	*	60	115701	ENSG00000198796	2595.84	1.58586	4.62305e-12	ALPK2
85	chr18	60905271	60905622	352	*	76	596	ENSG00000171791	308.996	1.16482	7.94821e-08	BCL2
86	chr18	77725352	77725768	417	*	45	440498	ENSG00000226742	284.455	2.97064	1.97878e-80	HSBP1L1
87	chr19	2540320	2541524	1205	*	889	4616	ENSG00000099860	977.097	1.06408	3.12364e-19	GADD45B
88	chr19	2578785	2579220	436	*	46	4616	ENSG00000099860	977.097	1.06408	3.12364e-19	GADD45B
89	chr19	34971987	34972691	705	*	1010	126374	ENSG00000142279	955.442	2.23072	5.27694e-33	WTIP
90	chr19	45129235	45129594	360	*	164	147710	ENSG00000216588	35.7386	1.64435	4.25463e-05	IGSF23
91	chr19	54362249	54362538	290	*	52	91663	ENSG00000179820	3260.6	1.62278	7.29058e-47	MYADM
92	chr2	20212343	20212760	418	*	82	4148	ENSG00000132031	531.015	2.01115	9.0005e-46	MATN3
93	chr2	23787410	23787677	268	*	15	114818	ENSG00000119771	1265.21	1.30755	1.72852e-18	KLHL29
94	chr2	26981036	26981590	555	*	45	54978	ENSG00000213699	2445.05	1.46672	8.70964e-15	SLC35F6
95	chr2	46166084	46166380	297	*	52	5581	ENSG00000171132	1501.61	1.48731	1.0811e-12	PRKCE
96	chr2	46294732	46295067	336	*	38	2034	ENSG00000116016	9233.83	1.04486	3.22577e-27	EPAS1
97	chr2	46324833	46325342	510	*	60	2034	ENSG00000116016	9233.83	1.04486	3.22577e-27	EPAS1
98	chr2	128432859	128433243	385	*	34	55679	ENSG00000072163	478.474	3.512	6.61195e-87	LIMS2
99	chr2	192731708	192732269	562	*	52	8436	ENSG00000168497	121.51	2.4142	0.000285246	CAVIN2
100	chr20	4066133	4066421	289	*	90	54498	ENSG00000088826	2279.03	1.03666	0.00010553	SMOX
101	chr20	4115377	4115882	506	*	37	54498	ENSG00000088826	2279.03	1.03666	0.00010553	SMOX
102	chr20	42844950	42845318	369	*	17	100505783	ENSG00000223891	334.893	1.01873	3.3941e-12	OSER1-DT
103	chr20	55606089	55606573	485	*	81	655	ENSG00000101144	617.239	1.52096	7.39011e-11	BMP7
104	chr21	18899958	18900225	268	*	45	1525	ENSG00000154639	430.958	2.67338	1.93334e-52	CXADR
105	chr21	30631119	30631588	470	*	82	571	ENSG00000156273	2018.7	1.17136	8.08941e-10	BACH1
106	chr21	35899149	35899617	469	*	86	1827	ENSG00000159200	3868.5	1.91656	3.4155e-49	RCAN1
107	chr21	46348705	46349043	339	*	37	3689	ENSG00000160255	124.991	1.34529	0.000251499	ITGB2
108	chr22	30602839	30603333	495	*	133	3976	ENSG00000128342	154.155	1.00215	0.000956983	LIF
109	chr22	36025786	36026155	370	*	229	4151	ENSG00000198125	5.19096	3.02579	0.0447594	MB
110	chr22	37942123	37942481	359	*	69	11135	ENSG00000128283	3906.3	1.29127	2.02164e-12	CDC42EP1
111	chr22	37956847	37957348	502	*	69	11135	ENSG00000128283	3906.3	1.29127	2.02164e-12	CDC42EP1
112	chr22	38614686	38615080	395	*	153	23764	ENSG00000185022	607.032	3.69949	1.46716e-96	MAFF
113	chr3	16525302	16526428	1127	*	133	23180	ENSG00000131378	2508.13	1.55342	1.39965e-45	RFTN1
114	chr3	49506637	49507329	693	*	107	1605	ENSG00000173402	8402.8	1.17265	2.70648e-27	DAG1
115	chr3	50301808	50302548	741	*	102	7869	ENSG00000012171	1213.28	1.76311	5.08265e-18	SEMA3B
116	chr3	58033690	58034187	498	*	68	2317	ENSG00000136068	29152.8	1.63423	1.32808e-35	FLNB
117	chr3	86914672	86914984	313	*	23	389136	ENSG00000206538	29.0057	1.82442	5.46215e-05	VGLL3
118	chr3	134032225	134032601	377	*	123	51421	ENSG00000114019	5194.21	2.61702	2.42188e-151	AMOTL2
119	chr3	134045636	134046173	538	*	261	51421	ENSG00000114019	5194.21	2.61702	2.42188e-151	AMOTL2
120	chr3	134076332	134076949	618	*	192	51421	ENSG00000114019	5194.21	2.61702	2.42188e-151	AMOTL2
121	chr3	134077317	134077625	309	*	10	51421	ENSG00000114019	5194.21	2.61702	2.42188e-151	AMOTL2
122	chr3	134082696	134083239	544	*	645	51421	ENSG00000114019	5194.21	2.61702	2.42188e-151	AMOTL2
123	chr3	134092213	134093797	1585	*	961	51421	ENSG00000114019	5194.21	2.61702	2.42188e-151	AMOTL2
124	chr4	184019710	184020366	657	*	655	152641	ENSG00000251359	13.9877	1.61747	0.00352825	WWC2-AS2
125	chr4	187354862	187355272	411	*	27	285441	ENSG00000251165	217.363	1.69115	1.42664e-10	F11-AS1
126	chr5	956680	957627	948	*	233	100506688	ENSG00000215246	130.567	3.17088	4.07102e-37	AC116351.1
127	chr5	17169474	17169762	289	*	28	10409	ENSG00000176788	2291.35	2.28932	5.21519e-53	BASP1
128	chr5	34609234	34609521	288	*	81	26064	ENSG00000039560	6837	1.28486	1.89855e-14	RAI14
129	chr5	34610042	34610300	259	*	41	26064	ENSG00000039560	6837	1.28486	1.89855e-14	RAI14
130	chr5	38765596	38766327	732	*	108	9180	ENSG00000145623	15770.7	1.23781	1.92483e-25	OSMR
131	chr5	38783291	38783609	319	*	56	9180	ENSG00000145623	15770.7	1.23781	1.92483e-25	OSMR
132	chr5	38845886	38846339	454	*	122	9180	ENSG00000145623	15770.7	1.23781	1.92483e-25	OSMR
133	chr5	52160527	52160818	292	*	30	3672	ENSG00000213949	11661.1	1.67798	4.70107e-42	ITGA1
134	chr5	68797782	68798216	435	*	126	100506658	ENSG00000197822	724.086	2.52656	3.29802e-31	OCLN
135	chr5	73680967	73681251	285	*	82	3074	ENSG00000049860	16325.6	1.38376	4.71773e-54	HEXB
136	chr5	73838716	73839702	987	*	89	3074	ENSG00000049860	16325.6	1.38376	4.71773e-54	HEXB
137	chr5	73890729	73891358	630	*	127	3074	ENSG00000049860	16325.6	1.38376	4.71773e-54	HEXB
138	chr5	150016653	150017378	726	*	89	11346	ENSG00000171992	2426.23	1.40845	5.62971e-35	SYNPO
139	chr5	150024418	150024971	554	*	93	11346	ENSG00000171992	2426.23	1.40845	5.62971e-35	SYNPO
140	chr5	156717240	156717707	468	*	63	26999	ENSG00000055163	654.882	1.87877	1.00817e-14	CYFIP2
141	chr5	174715190	174715507	318	*	77	1812	ENSG00000184845	26.4566	1.68337	0.000273271	DRD1
142	chr6	30712449	30712855	407	*	52	8870	ENSG00000137331	2184.94	1.61878	1.32378e-37	IER3
143	chr6	37093895	37094450	556	*	104	5292	ENSG00000137193	1122.78	1.49618	1.91932e-13	PIM1
144	chr6	37105305	37105858	554	*	77	5292	ENSG00000137193	1122.78	1.49618	1.91932e-13	PIM1
145	chr6	74289898	74290319	422	*	104	26503	ENSG00000119899	973.125	2.19234	2.18112e-50	SLC17A5
146	chr6	74295491	74296051	561	*	77	26503	ENSG00000119899	973.125	2.19234	2.18112e-50	SLC17A5
147	chr6	75915126	75915419	294	*	19	1303	ENSG00000111799	7146.72	2.61566	1.55371e-87	COL12A1
148	chr6	75915687	75915967	281	*	18	1303	ENSG00000111799	7146.72	2.61566	1.55371e-87	COL12A1
149	chr6	76027250	76027550	301	*	37	27145	ENSG00000118407	45.8163	1.02076	0.000644145	FILIP1
150	chr6	132272297	132273024	728	*	385	1490	ENSG00000118523	8122.71	3.12333	1.80124e-57	CCN2
151	chr7	500185	500446	262	*	37	5154	ENSG00000197461	1396.48	2.04873	2.93492e-49	PDGFA
152	chr7	500861	501374	514	*	297	5154	ENSG00000197461	1396.48	2.04873	2.93492e-49	PDGFA
153	chr7	1576493	1577559	1067	*	394	7975	ENSG00000198517	1886.64	1.97922	9.59389e-74	MAFK
154	chr7	22600871	22601348	478	*	409	100506178	ENSG00000232759	40.6027	1.9291	1.93117e-09	AC002480.1
155	chr7	22616853	22617235	383	*	60	100506178	ENSG00000232759	40.6027	1.9291	1.93117e-09	AC002480.1
156	chr7	22626202	22626955	754	*	138	100506178	ENSG00000232759	40.6027	1.9291	1.93117e-09	AC002480.1
157	chr7	27135175	27135707	533	*	160	3198	ENSG00000105991	545.361	1.24266	1.85488e-30	HOXA1
158	chr7	48123033	48123377	345	*	26	7378	ENSG00000183696	3542.44	4.03444	1.26792e-94	UPP1
159	chr7	100760671	100760984	314	*	120	5054	ENSG00000106366	2089.77	2.5573	5.60891e-55	SERPINE1
160	chr7	100765346	100765637	292	*	46	5054	ENSG00000106366	2089.77	2.5573	5.60891e-55	SERPINE1
161	chr7	105470608	105471680	1073	*	72	222255	ENSG00000146776	780.669	1.1212	3.0952e-18	ATXN7L1
162	chr7	129934234	129934492	259	*	19	51200	ENSG00000128510	8124.8	3.17201	3.77801e-86	CPA4
163	chr7	134427070	134427416	347	*	90	800	ENSG00000122786	17077	1.13098	4.02425e-18	CALD1
164	chr7	134464064	134464569	506	*	335	800	ENSG00000122786	17077	1.13098	4.02425e-18	CALD1
165	chr7	134855248	134855779	532	*	85	78996	ENSG00000122783	3033.6	1.33307	4.40046e-18	CYREN
166	chr7	135442942	135443311	370	*	53	389558	ENSG00000189320	81.8817	2.53195	1.45733e-10	FAM180A
167	chr7	151384460	151385166	707	*	265	51422	ENSG00000106617	1255.56	1.17896	7.47677e-18	PRKAG2
168	chr7	151451083	151451720	638	*	649	51422	ENSG00000106617	1255.56	1.17896	7.47677e-18	PRKAG2
169	chr8	1771745	1772089	345	*	45	9639	ENSG00000104728	3349.75	1.58911	1.15247e-53	ARHGEF10
170	chr8	11748677	11748955	279	*	23	1508	ENSG00000164733	51746.6	1.20431	5.75639e-21	CTSB
171	chr8	17533644	17533914	271	*	45	57509	ENSG00000129422	3968.75	1.01901	3.28591e-27	MTUS1
172	chr8	27206199	27206514	316	*	23	2185	ENSG00000120899	244.602	1.12241	8.45569e-06	PTK2B
173	chr8	38857155	38857665	511	*	23	8754	ENSG00000168615	9482.94	1.06942	1.95802e-11	ADAM9
174	chr8	67434445	67434904	460	*	25	254778	ENSG00000169085	179.482	1.56034	3.3238e-13	VXN
175	chr8	102063535	102063910	376	*	114	441374	ENSG00000248599	5.2134	3.79482	0.0191481	AC018781.1
176	chr8	143757658	143758007	350	*	96	8000	ENSG00000167653	27.2928	2.76745	6.7049e-09	PSCA
177	chr8	144097296	144097653	358	*	60	100133669	ENSG00000247317	189.854	1.38105	8.97793e-16	LY6E-DT
178	chr9	707011	707400	390	*	58	23189	ENSG00000107104	4383.02	1.0194	1.0403e-45	KANK1
179	chr9	5509461	5509868	408	*	22	80380	ENSG00000197646	137.941	2.2445	1.67016e-19	PDCD1LG2
180	chr9	78987063	78987379	317	*	37	55312	ENSG00000135002	851.805	1.0145	1.1852e-08	RFK
181	chr9	98269647	98270217	571	*	37	5727	ENSG00000185920	1620.68	1.45509	1.32939e-18	PTCH1
182	chr9	100639252	100639765	514	*	60	2304	ENSG00000178919	349.402	1.4999	4.76879e-16	FOXE1
183	chr9	124113550	124113911	362	*	50	2040	ENSG00000148175	8123.48	1.45016	5.03691e-90	STOM
184	chr9	127421345	127422015	671	*	476	100379345	ENSG00000224020	24.1637	1.53087	0.000187521	MIR181A2HG
185	chr9	131314982	131315253	272	*	30	6709	ENSG00000197694	27548.3	1.12989	1.61544e-57	SPTAN1
186	chr9	131316389	131317843	1455	*	255	6709	ENSG00000197694	27548.3	1.12989	1.61544e-57	SPTAN1
187	chr9	131320799	131321311	513	*	93	6709	ENSG00000197694	27548.3	1.12989	1.61544e-57	SPTAN1
188	chrX	133738181	133738449	269	*	60	10761	ENSG00000170965	82.0856	1.84228	1.21377e-12	PLAC1
189	chrX	133803948	133804345	398	*	45	10761	ENSG00000170965	82.0856	1.84228	1.21377e-12	PLAC1
190	chrX	139805527	139805829	303	*	86	286411	ENSG00000203930	86.5282	2.76983	1.60193e-29	LINC00632
191	chrX	152066053	152066588	536	*	557	7739	ENSG00000147394	2431.65	2.62345	1.95364e-134	ZNF185

## Sheet: TFE3_ChIP_RNAseq_merged
	seqnames	start	end	width	strand	V5	geneId	ENSEMBL	baseMean	log2 Fold Change	padj	Gene
1	chr5	39423971	39425270	1300	*	246	1601	ENSG00000153071	9628.49	0.358876	0.0167761	DAB2
2	chr6	75915126	75915419	294	*	19	1303	ENSG00000111799	7146.72	0.568402	0.0221238	COL12A1
3	chr6	75915687	75915967	281	*	18	1303	ENSG00000111799	7146.72	0.568402	0.0221238	COL12A1

## Sheet: TAZ4SA_ChIP_RNAseq_merged
	seqnames	start	end	width	strand	V5	geneId	ENSEMBL	baseMean	log2 Fold Change	padj	Gene
1	chr1	11918805	11919783	979	*	32	4879	ENSG00000120937	2240.65	10.6746	2.7524e-73	NPPB
2	chr1	16126741	16127095	355	*	35	440567	ENSG00000233954	16.3702	1.62107	0.00326421	UQCRHL
3	chr1	16471673	16472390	718	*	133	1969	ENSG00000142627	5020.24	1.5307	5.23195e-38	EPHA2
4	chr1	16472812	16473079	268	*	143	1969	ENSG00000142627	5020.24	1.5307	5.23195e-38	EPHA2
5	chr1	16500060	16500469	410	*	428	1969	ENSG00000142627	5020.24	1.5307	5.23195e-38	EPHA2
6	chr1	26745520	26745805	286	*	68	79727	ENSG00000131914	640.034	1.30415	6.36614e-21	LIN28A
7	chr1	31869995	31870851	857	*	173	347735	ENSG00000168528	3346.32	2.24905	1.12674e-34	SERINC2
8	chr1	32041442	32041720	279	*	104	64129	ENSG00000142910	244.133	5.3276	3.17971e-53	TINAGL1
9	chr1	41331964	41332315	352	*	154	163732	ENSG00000179862	281.977	1.73135	1.25546e-17	CITED4
10	chr1	43672519	43672978	460	*	326	10969	ENSG00000117395	5155.5	1.18217	4.70743e-35	EBNA1BP2
11	chr1	43938233	43938717	485	*	124	81888	ENSG00000178922	1853.67	2.1889	2.92714e-67	HYI
12	chr1	86072824	86073265	442	*	428	3491	ENSG00000142871	10596.6	4.42143	0	CCN1
13	chr1	95111719	95112144	426	*	68	2152	ENSG00000117525	631.683	2.55766	1.89404e-39	F3
14	chr1	162508731	162509087	357	*	28	6675	ENSG00000117143	2438.45	1.60749	2.87729e-41	UAP1
15	chr1	204273366	204273663	298	*	35	22874	ENSG00000143850	883.887	1.04074	3.17871e-06	PLEKHA6
16	chr1	210612302	210612835	534	*	254	55733	ENSG00000054392	280.182	1.17077	1.44773e-18	HHAT
17	chr1	212686475	212686772	298	*	104	467	ENSG00000162772	836.543	2.44154	2.13523e-19	ATF3
18	chr1	218653748	218654207	460	*	85	728463	ENSG00000232480	227.616	3.09318	1.99466e-56	TGFB2-AS1
19	chr1	218879344	218880109	766	*	87	728463	ENSG00000232480	227.616	3.09318	1.99466e-56	TGFB2-AS1
20	chr10	10827768	10828129	362	*	77	207107	ENSG00000225383	288.221	9.63758	8.17189e-26	SFTA1P
21	chr10	47057731	47058040	310	*	72	5540	ENSG00000204174	21.7467	2.63515	6.42684e-05	NPY4R
22	chr10	71598801	71599065	265	*	68	1305	ENSG00000197467	1295.8	1.8078	2.21848e-35	COL13A1
23	chr10	73526553	73526989	437	*	219	64115	ENSG00000107738	1076.14	1.14768	6.42134e-13	VSIR
24	chr10	92690792	92691202	411	*	186	27063	ENSG00000148677	2371.13	7.93168	1.24302e-76	ANKRD1
25	chr10	100028822	100029417	596	*	133	84171	ENSG00000138131	806.099	1.66902	8.00561e-39	LOXL4
26	chr10	101155708	101156050	343	*	77	2805	ENSG00000120053	2517.09	1.22696	5.29222e-15	GOT1
27	chr11	707713	708231	519	*	92	64787	ENSG00000177106	349.988	2.72057	2.65266e-38	EPS8L2
28	chr11	9787192	9787471	280	*	174	440028	ENSG00000245522	102.798	2.55415	7.10502e-28	AC026250.1
29	chr11	12108006	12108314	309	*	59	9645	ENSG00000133816	7480.93	1.57697	5.89253e-33	MICAL2
30	chr11	12204300	12204763	464	*	84	9645	ENSG00000133816	7480.93	1.57697	5.89253e-33	MICAL2
31	chr11	12221919	12222589	671	*	71	9645	ENSG00000133816	7480.93	1.57697	5.89253e-33	MICAL2
32	chr11	14443880	14444276	397	*	301	22800	ENSG00000133818	2136.44	1.04738	3.7928e-27	RRAS2
33	chr11	35188198	35188474	277	*	175	960	ENSG00000026508	26250	1.29984	1.78976e-30	CD44
34	chr11	62320766	62321499	734	*	66	79026	ENSG00000124942	122265	1.14908	3.92689e-42	AHNAK
35	chr11	65670612	65671088	477	*	265	8061	ENSG00000175592	1816.84	3.41953	4.01123e-43	FOSL1
36	chr11	65782763	65783279	517	*	347	1474	ENSG00000175315	11.6176	4.11903	6.91835e-06	CST6
37	chr11	69064692	69065140	449	*	142	26579	ENSG00000172927	22.2715	1.91746	0.00865431	MYEOV
38	chr11	69068965	69069447	483	*	102	26579	ENSG00000172927	22.2715	1.91746	0.00865431	MYEOV
39	chr11	69235335	69235901	567	*	327	26579	ENSG00000172927	22.2715	1.91746	0.00865431	MYEOV
40	chr11	69251856	69252129	274	*	339	26579	ENSG00000172927	22.2715	1.91746	0.00865431	MYEOV
41	chr11	69259075	69259410	336	*	15	595	ENSG00000110092	9113.41	1.28483	1.47758e-18	CCND1
42	chr11	69264482	69264887	406	*	105	595	ENSG00000110092	9113.41	1.28483	1.47758e-18	CCND1
43	chr11	69312001	69312382	382	*	519	595	ENSG00000110092	9113.41	1.28483	1.47758e-18	CCND1
44	chr11	69382580	69383128	549	*	364	595	ENSG00000110092	9113.41	1.28483	1.47758e-18	CCND1
45	chr11	69402593	69403055	463	*	47	595	ENSG00000110092	9113.41	1.28483	1.47758e-18	CCND1
46	chr11	69451291	69451559	269	*	100	595	ENSG00000110092	9113.41	1.28483	1.47758e-18	CCND1
47	chr11	71010432	71010721	290	*	256	22941	ENSG00000162105	32.4746	3.04611	0.00215912	SHANK2
48	chr11	73850844	73851313	470	*	166	26005	ENSG00000168014	3048.9	1.72615	1.20333e-88	C2CD3
49	chr11	75201801	75202124	324	*	143	81544	ENSG00000158555	1564.67	1.20446	4.97923e-19	GDPD5
50	chr11	114162084	114162403	320	*	22	4837	ENSG00000166741	7823.23	1.65017	7.45908e-18	NNMT
51	chr11	114165658	114166091	434	*	84	4837	ENSG00000166741	7823.23	1.65017	7.45908e-18	NNMT
52	chr11	114166532	114166994	463	*	32	4837	ENSG00000166741	7823.23	1.65017	7.45908e-18	NNMT
53	chr11	115547383	115547745	363	*	138	283143	ENSG00000246100	27.3923	1.76119	0.0032137	LINC00900
54	chr11	120436804	120437119	316	*	49	2900	ENSG00000149403	72.0864	2.71664	3.41974e-07	GRIK4
55	chr11	120581233	120581564	332	*	140	2900	ENSG00000149403	72.0864	2.71664	3.41974e-07	GRIK4
56	chr11	122577411	122577702	292	*	68	84959	ENSG00000154127	966.822	1.26785	5.09238e-10	UBASH3B
57	chr11	124768577	124768904	328	*	131	54538	ENSG00000154133	76.2827	3.75618	1.0681e-13	ROBO4
58	chr11	128050405	128050708	304	*	31	2113	ENSG00000134954	13708.9	1.44048	3.46266e-84	ETS1
59	chr11	128077756	128078447	692	*	170	2113	ENSG00000134954	13708.9	1.44048	3.46266e-84	ETS1
60	chr11	128080241	128080896	656	*	92	2113	ENSG00000134954	13708.9	1.44048	3.46266e-84	ETS1
61	chr11	128392416	128392689	274	*	122	2113	ENSG00000134954	13708.9	1.44048	3.46266e-84	ETS1
62	chr11	129731767	129732255	489	*	266	120224	ENSG00000151715	21.7712	1.74998	0.000456391	TMEM45B
63	chr12	4225529	4226142	614	*	174	894	ENSG00000118971	40.5571	5.13194	4.18062e-12	CCND2
64	chr12	6225691	6226037	347	*	29	7450	ENSG00000110799	121.57	1.53635	2.50654e-06	VWF
65	chr12	33045015	33045321	307	*	114	5318	ENSG00000057294	1275.45	1.65941	1.10059e-54	PKP2
66	chr12	50595583	50595897	315	*	51	51474	ENSG00000050405	10004.9	1.00074	1.39847e-19	LIMA1
67	chr12	52541124	52541411	288	*	146	144501	ENSG00000167767	1730.68	6.98446	8.65277e-226	KRT80
68	chr12	52585667	52586263	597	*	133	144501	ENSG00000167767	1730.68	6.98446	8.65277e-226	KRT80
69	chr12	53370603	53370879	277	*	144	3856	ENSG00000170421	14283.6	3.56185	3.43828e-225	KRT8
70	chr12	104613389	104614010	622	*	114	7296	ENSG00000198431	33083.7	2.17291	2.71479e-33	TXNRD1
71	chr12	105879187	105879861	675	*	85	387882	ENSG00000235162	2759.52	1.1772	6.00659e-36	C12orf75
72	chr12	106410492	106410751	260	*	186	9891	ENSG00000074590	3145.05	1.80351	1.63935e-58	NUAK1
73	chr12	106424406	106424821	416	*	114	9891	ENSG00000074590	3145.05	1.80351	1.63935e-58	NUAK1
74	chr12	113767506	113767933	428	*	85	80024	ENSG00000089060	1452.1	1.43344	7.98126e-31	SLC8B1
75	chr12	118125055	118125341	287	*	21	283455	ENSG00000171435	287.877	2.26101	6.19232e-22	KSR2
76	chr13	21635502	21635893	392	*	197	26524	ENSG00000150457	922.068	1.9268	8.75202e-69	LATS2
77	chr13	99762286	99762554	269	*	18	23348	ENSG00000088387	3479.8	1.0374	3.87319e-19	DOCK9
78	chr13	102102592	102103143	552	*	304	9358	ENSG00000198542	61.5858	3.33006	2.02664e-18	ITGBL1
79	chr13	102107201	102108511	1311	*	151	9358	ENSG00000198542	61.5858	3.33006	2.02664e-18	ITGBL1
80	chr13	102237633	102237947	315	*	72	9358	ENSG00000198542	61.5858	3.33006	2.02664e-18	ITGBL1
81	chr14	23446951	23447252	302	*	174	84962	ENSG00000129474	9629.72	2.6722	6.47716e-56	AJUBA
82	chr14	23449667	23450184	518	*	606	84962	ENSG00000129474	9629.72	2.6722	6.47716e-56	AJUBA
83	chr14	23451856	23452210	355	*	242	84962	ENSG00000129474	9629.72	2.6722	6.47716e-56	AJUBA
84	chr14	67688136	67688636	501	*	289	64398	ENSG00000072415	2731.6	1.3167	1.05313e-19	MPP5
85	chr14	75919704	75920208	505	*	424	122953	ENSG00000140044	1542.86	2.39787	4.29239e-31	JDP2
86	chr14	80892031	80892336	306	*	123	1734	ENSG00000211448	72.3743	2.46187	3.79538e-08	DIO2
87	chr14	100040819	100041679	861	*	104	317762	ENSG00000205476	2884.1	1.40644	2.52485e-29	CCDC85C
88	chr14	100046219	100046595	377	*	610	317762	ENSG00000205476	2884.1	1.40644	2.52485e-29	CCDC85C
89	chr14	105434344	105434661	318	*	133	113146	ENSG00000185567	1587.71	1.30293	2.54147e-14	AHNAK2
90	chr14	105439591	105439991	401	*	186	113146	ENSG00000185567	1587.71	1.30293	2.54147e-14	AHNAK2
91	chr15	63400188	63400604	417	*	508	114294	ENSG00000103642	732.05	1.26234	2.55257e-22	LACTB
92	chr15	74714954	74715596	643	*	212	8482	ENSG00000138623	526.885	2.12393	3.2585e-33	SEMA7A
93	chr16	3070872	3071210	339	*	338	51330	ENSG00000006327	3033.22	3.37607	5.09179e-112	TNFRSF12A
94	chr16	4994834	4995111	278	*	68	5493	ENSG00000118898	285.507	2.53769	1.56273e-31	PPL
95	chr16	57682614	57683027	414	*	35	9289	ENSG00000205336	794.478	1.24934	3.61321e-06	ADGRG1
96	chr16	67005020	67005415	396	*	157	23491	ENSG00000172828	106.624	1.79591	5.40116e-12	CES3
97	chr16	70727806	70728577	772	*	606	92154	ENSG00000132613	4140.21	1.24283	5.38529e-32	MTSS1L
98	chr16	77332420	77332843	424	*	123	170692	ENSG00000140873	25.1879	1.18801	0.0457691	ADAMTS18
99	chr16	81544985	81545304	320	*	82	80790	ENSG00000153815	2119.78	1.01258	1.37553e-21	CMIP
100	chr16	81551292	81551837	546	*	95	80790	ENSG00000153815	2119.78	1.01258	1.37553e-21	CMIP
101	chr16	84839999	84840262	264	*	42	83716	ENSG00000103196	701.9	1.02531	3.67428e-06	CRISPLD2
102	chr16	84871900	84872211	312	*	51	83716	ENSG00000103196	701.9	1.02531	3.67428e-06	CRISPLD2
103	chr16	84884903	84885246	344	*	96	83716	ENSG00000103196	701.9	1.02531	3.67428e-06	CRISPLD2
104	chr16	86806149	86806730	582	*	208	2300	ENSG00000176678	378.207	1.1116	3.12649e-14	FOXL1
105	chr16	87212597	87213073	477	*	42	100506581	ENSG00000260456	250.612	1.15337	2.12541e-10	C16orf95
106	chr16	88365689	88366172	484	*	114	84627	ENSG00000225614	430.187	1.47823	2.83196e-14	ZNF469
107	chr16	89647827	89648138	312	*	35	27132	ENSG00000178773	438.107	1.52842	3.85705e-21	CPNE7
108	chr17	831197	831588	392	*	59	64359	ENSG00000167693	1791.1	1.05925	4.32068e-18	NXN
109	chr17	836585	836917	333	*	144	64359	ENSG00000167693	1791.1	1.05925	4.32068e-18	NXN
110	chr17	854946	855343	398	*	29	64359	ENSG00000167693	1791.1	1.05925	4.32068e-18	NXN
111	chr17	3571343	3571701	359	*	14	30851	ENSG00000213977	4806.33	1.00141	3.72079e-16	TAX1BP3
112	chr17	9551279	9552360	1082	*	186	124739	ENSG00000154914	231.423	1.52497	2.82378e-18	USP43
113	chr17	15824088	15824437	350	*	94	136	ENSG00000170425	805.83	1.39053	3.34766e-31	ADORA2B
114	chr17	15857520	15857792	273	*	28	136	ENSG00000170425	805.83	1.39053	3.34766e-31	ADORA2B
115	chr17	36607203	36607464	262	*	363	57636	ENSG00000275832	5404.48	1.01974	1.14832e-30	ARHGAP23
116	chr17	36621050	36621428	379	*	43	57636	ENSG00000275832	5404.48	1.01974	1.14832e-30	ARHGAP23
117	chr17	42620333	42621215	883	*	400	2535	ENSG00000180340	1127.5	1.16513	3.73382e-19	FZD2
118	chr17	48105528	48106199	672	*	428	284080	ENSG00000246640	40.0976	2.13699	2.66535e-09	PICART1
119	chr17	54776711	54777165	455	*	95	9241	ENSG00000183691	208.133	2.32801	8.41803e-14	NOG
120	chr17	81066625	81066952	328	*	93	284207	ENSG00000176845	538.626	1.53357	1.74036e-23	METRNL
121	chr18	3247445	3247787	343	*	124	10627	ENSG00000101608	9438.49	1.01875	1.09404e-33	MYL12A
122	chr18	55880870	55881205	336	*	28	23327	ENSG00000049759	4687.22	1.3415	1.22491e-43	NEDD4L
123	chr18	56252034	56252358	325	*	254	115701	ENSG00000198796	2595.84	2.63778	3.85872e-32	ALPK2
124	chr18	76252022	76252617	596	*	522	27164	ENSG00000256463	117.017	12.063	0.0452524	SALL3
125	chr18	76610946	76611303	358	*	85	27164	ENSG00000256463	117.017	12.063	0.0452524	SALL3
126	chr19	2540426	2541577	1152	*	949	4616	ENSG00000099860	977.097	2.89661	1.74809e-145	GADD45B
127	chr19	6801190	6801484	295	*	77	7409	ENSG00000141968	107.623	1.84455	1.49936e-11	VAV1
128	chr19	13148148	13148413	266	*	54	4784	ENSG00000008441	4322.55	1.1691	1.91915e-34	NFIX
129	chr19	16449517	16449963	447	*	314	10365	ENSG00000127528	119.591	1.52881	1.53482e-11	KLF2
130	chr19	34972216	34972661	446	*	197	126374	ENSG00000142279	955.442	1.92076	2.31914e-24	WTIP
131	chr19	39150272	39150540	269	*	77	81	ENSG00000130402	24964.7	1.69671	1.96911e-61	ACTN4
132	chr19	39156768	39157026	259	*	144	81	ENSG00000130402	24964.7	1.69671	1.96911e-61	ACTN4
133	chr19	41729361	41729778	418	*	606	558	ENSG00000167601	11912.6	3.20642	4.26825e-81	AXL
134	chr19	41731738	41732350	613	*	389	558	ENSG00000167601	11912.6	3.20642	4.26825e-81	AXL
135	chr19	54545376	54545939	564	*	133	284415	ENSG00000189068	56.6076	6.87664	4.81434e-21	VSTM1
136	chr2	36599212	36599778	567	*	208	51232	ENSG00000150938	9816.06	2.50894	4.90013e-112	CRIM1
137	chr2	37817283	37817662	380	*	123	10602	ENSG00000163171	1854.37	2.95909	1.20028e-40	CDC42EP3
138	chr2	37995707	37996071	365	*	315	10602	ENSG00000163171	1854.37	2.95909	1.20028e-40	CDC42EP3
139	chr2	46191293	46191638	346	*	59	5581	ENSG00000171132	1501.61	2.2818	6.32621e-29	PRKCE
140	chr2	47082424	47082853	430	*	153	100134259	ENSG00000239332	98.2556	1.5515	4.23962e-09	LINC01119
141	chr2	47261340	47262054	715	*	116	57217	ENSG00000068724	1548.82	1.05353	3.63228e-27	TTC7A
142	chr2	47270488	47271211	724	*	133	57217	ENSG00000068724	1548.82	1.05353	3.63228e-27	TTC7A
143	chr2	47296935	47297372	438	*	387	57217	ENSG00000068724	1548.82	1.05353	3.63228e-27	TTC7A
144	chr2	47497063	47497428	366	*	28	805	ENSG00000143933	26395.3	1.21832	1.75918e-40	CALM2
145	chr2	64881278	64881930	653	*	856	9792	ENSG00000179833	1650.9	1.16589	4.88432e-28	SERTAD2
146	chr2	71944204	71944554	351	*	55	8291	ENSG00000135636	2529.15	1.45025	3.00227e-25	DYSF
147	chr2	71970201	71970583	383	*	301	8291	ENSG00000135636	2529.15	1.45025	3.00227e-25	DYSF
148	chr2	72060855	72061164	310	*	31	8291	ENSG00000135636	2529.15	1.45025	3.00227e-25	DYSF
149	chr2	85185189	85185534	346	*	133	56888	ENSG00000176407	2322.44	1.04398	6.66242e-15	KCMF1
150	chr2	173918142	173918437	296	*	123	51776	ENSG00000091436	5636.63	1.79274	1.80421e-35	MAP3K20
151	chr2	192500571	192501167	597	*	123	64859	ENSG00000173559	2078.39	1.56352	2.44874e-18	NABP1
152	chr2	202016018	202016307	290	*	59	65072	ENSG00000226312	19.0142	1.35371	0.00884524	CFLAR-AS1
153	chr2	217237552	217238307	756	*	258	57574	ENSG00000144583	1178.18	4.82744	7.087e-83	2020-03-04
154	chr2	235336300	235336569	270	*	114	10123	ENSG00000188042	1081.7	1.41861	1.3727e-24	ARL4C
155	chr2	235889990	235890375	386	*	231	23677	ENSG00000130147	4262.93	1.68501	8.64488e-64	SH3BP4
156	chr2	236007477	236007859	383	*	123	23677	ENSG00000130147	4262.93	1.68501	8.64488e-64	SH3BP4
157	chr2	237149120	237149456	337	*	59	401036	ENSG00000182177	18.3513	4.62149	1.95921e-05	ASB18
158	chr2	237569826	237570096	271	*	51	57007	ENSG00000144476	110.635	2.16381	1.88201e-20	ACKR3
159	chr20	8995838	8996913	1076	*	404	5332	ENSG00000101333	1544.33	2.3748	8.09405e-35	PLCB4
160	chr20	9181402	9181921	520	*	256	5332	ENSG00000101333	1544.33	2.3748	8.09405e-35	PLCB4
161	chr20	22743670	22744411	742	*	72	3170	ENSG00000125798	107.311	1.61966	1.59945e-10	FOXA2
162	chr20	22756082	22756691	610	*	169	3170	ENSG00000125798	107.311	1.61966	1.59945e-10	FOXA2
163	chr20	30300584	30301410	827	*	221	598	ENSG00000171552	5620.75	1.50233	7.26397e-74	BCL2L1
164	chr20	30307711	30308503	793	*	258	598	ENSG00000171552	5620.75	1.50233	7.26397e-74	BCL2L1
165	chr20	43966332	43966805	474	*	181	6385	ENSG00000124145	4176.42	1.85689	8.79379e-40	SDC4
166	chr20	45503618	45503902	285	*	30	2139	ENSG00000064655	133.823	1.26581	2.26947e-10	EYA2
167	chr20	52757538	52757830	293	*	103	1591	ENSG00000019186	230.735	1.11635	3.95238e-07	CYP24A1
168	chr20	59760991	59761669	679	*	841	1002	ENSG00000179242	706.331	4.8376	1.30946e-109	CDH4
169	chr20	60163773	60164312	540	*	17	1002	ENSG00000179242	706.331	4.8376	1.30946e-109	CDH4
170	chr21	46348349	46349309	961	*	144	3689	ENSG00000160255	124.991	3.5343	8.0781e-27	ITGB2
171	chr22	19868703	19869020	318	*	707	10587	ENSG00000184470	1698.66	1.25333	8.6772e-36	TXNRD2
172	chr22	24870319	24870743	425	*	95	51733	ENSG00000100024	37.1543	2.85834	1.81041e-09	UPB1
173	chr22	26812797	26813143	347	*	77	57168	ENSG00000128203	456.486	1.02985	1.05071e-20	ASPHD2
174	chr22	30018125	30018465	341	*	154	4771	ENSG00000186575	3616.9	1.61486	6.41456e-55	NF2
175	chr22	33157409	33157784	376	*	28	7078	ENSG00000100234	33487.4	1.1575	1.57153e-15	TIMP3
176	chr22	33184852	33185296	445	*	154	7078	ENSG00000100234	33487.4	1.1575	1.57153e-15	TIMP3
177	chr22	36725492	36725792	301	*	35	4627	ENSG00000100345	39701.7	2.03579	1.82048e-90	MYH9
178	chr22	37828296	37828586	291	*	59	114794	ENSG00000166897	490.724	2.70467	9.2635e-36	ELFN2
179	chr22	37851225	37851615	391	*	35	114794	ENSG00000166897	490.724	2.70467	9.2635e-36	ELFN2
180	chr22	37893077	37893368	292	*	254	29775	ENSG00000100065	1474.57	1.17179	7.00617e-14	CARD10
181	chr22	37956958	37957853	896	*	54	11135	ENSG00000128283	3906.3	1.51361	9.86608e-17	CDC42EP1
182	chr22	39570767	39572655	1889	*	825	23492	ENSG00000100307	937.613	1.21529	3.80242e-16	CBX7
183	chr22	39610309	39611133	825	*	51	5155	ENSG00000100311	265.483	6.7477	3.27517e-82	PDGFB
184	chr22	46357860	46358120	261	*	85	7477	ENSG00000188064	200.41	3.66018	4.19614e-25	WNT7B
185	chr22	50345813	50346430	618	*	314	415116	ENSG00000198355	1569.13	1.52375	1.0162e-70	PIM3
186	chr3	13812040	13812473	434	*	85	7476	ENSG00000154764	74.4296	3.92415	8.08331e-22	WNT7A
187	chr3	13891832	13892170	339	*	240	7476	ENSG00000154764	74.4296	3.92415	8.08331e-22	WNT7A
188	chr3	58033638	58034235	598	*	59	2317	ENSG00000136068	29152.8	1.98252	3.70626e-52	FLNB
189	chr3	58546541	58546843	303	*	363	11170	ENSG00000168309	21.234	1.52958	0.00251837	FAM107A
190	chr3	99282083	99282401	319	*	28	1295	ENSG00000144810	2277.35	2.53833	4.53388e-39	COL8A1
191	chr3	100215632	100215982	351	*	87	55076	ENSG00000181458	771.371	2.32799	5.75358e-35	TMEM45A
192	chr3	111578200	111578601	402	*	35	90102	ENSG00000144824	5271.38	1.01708	8.51301e-10	PHLDB2
193	chr3	123469624	123469902	279	*	137	4638	ENSG00000065534	2007.99	1.42647	4.22261e-20	MYLK
194	chr3	124781958	124782238	281	*	145	57493	ENSG00000173706	10780.5	1.28882	6.37037e-68	HEG1
195	chr3	127487152	127487561	410	*	77	11343	ENSG00000074416	4291.09	1.95268	1.31013e-53	MGLL
196	chr3	134044958	134045329	372	*	35	51421	ENSG00000114019	5194.21	4.03876	0	AMOTL2
197	chr3	134045737	134046377	641	*	751	51421	ENSG00000114019	5194.21	4.03876	0	AMOTL2
198	chr3	134076653	134077052	400	*	289	51421	ENSG00000114019	5194.21	4.03876	0	AMOTL2
199	chr3	134082797	134083226	430	*	536	51421	ENSG00000114019	5194.21	4.03876	0	AMOTL2
200	chr3	134092703	134093716	1014	*	463	51421	ENSG00000114019	5194.21	4.03876	0	AMOTL2
201	chr3	159646507	159646862	356	*	105	3592	ENSG00000168811	40.2715	1.54135	2.13256e-06	IL12A
202	chr3	192597396	192597697	302	*	92	151963	ENSG00000180611	492.152	1.01928	5.98252e-21	MB21D2
203	chr4	184086259	184086638	380	*	35	80014	ENSG00000151718	2643.32	1.50945	1.27831e-17	WWC2
204	chr5	5145916	5146231	316	*	16	170690	ENSG00000145536	718.058	2.76794	2.53253e-33	ADAMTS16
205	chr5	5165658	5165914	257	*	19	170690	ENSG00000145536	718.058	2.76794	2.53253e-33	ADAMTS16
206	chr5	5222025	5222447	423	*	153	170690	ENSG00000145536	718.058	2.76794	2.53253e-33	ADAMTS16
207	chr5	6427875	6428154	280	*	31	134111	ENSG00000215218	493.862	1.46577	1.33583e-16	UBE2QL1
208	chr5	10513757	10514503	747	*	181	651746	ENSG00000164236	166.909	1.81744	1.77262e-20	ANKRD33B
209	chr5	10551317	10551977	661	*	1211	651746	ENSG00000164236	166.909	1.81744	1.77262e-20	ANKRD33B
210	chr5	14035982	14036418	437	*	65	1767	ENSG00000039139	297.436	1.38938	2.39675e-20	DNAH5
211	chr5	14036749	14037034	286	*	16	1767	ENSG00000039139	297.436	1.38938	2.39675e-20	DNAH5
212	chr5	14038434	14038782	349	*	39	1767	ENSG00000039139	297.436	1.38938	2.39675e-20	DNAH5
213	chr5	14265590	14266278	689	*	481	7204	ENSG00000038382	14689.8	1.06585	1.28937e-32	TRIO
214	chr5	17128206	17128493	288	*	21	10409	ENSG00000176788	2291.35	2.50677	1.91651e-63	BASP1
215	chr5	17249446	17249702	257	*	147	10409	ENSG00000176788	2291.35	2.50677	1.91651e-63	BASP1
216	chr5	35919307	35919575	269	*	107	133690	ENSG00000152611	15.1272	4.64357	3.2338e-06	CAPSL
217	chr5	52658546	52658816	271	*	99	10468	ENSG00000134363	410.437	2.86827	7.23235e-26	FST
218	chr5	52766264	52766773	510	*	130	10468	ENSG00000134363	410.437	2.86827	7.23235e-26	FST
219	chr5	56988697	56989141	445	*	66	345651	ENSG00000169067	62.3757	1.2889	0.000717019	ACTBL2
220	chr5	64494601	64494913	313	*	131	11174	ENSG00000049192	290.362	1.43455	5.97764e-17	ADAMTS6
221	chr5	68797814	68798074	261	*	35	100506658	ENSG00000197822	724.086	2.06952	6.07477e-21	OCLN
222	chr5	72934427	72934767	341	*	314	64283	ENSG00000214944	3310.08	2.44357	2.33653e-56	ARHGEF28
223	chr5	73060351	73060727	377	*	155	64283	ENSG00000214944	3310.08	2.44357	2.33653e-56	ARHGEF28
224	chr5	73234304	73234652	349	*	62	64283	ENSG00000214944	3310.08	2.44357	2.33653e-56	ARHGEF28
225	chr5	150017173	150017606	434	*	314	11346	ENSG00000171992	2426.23	1.07315	2.22076e-20	SYNPO
226	chr5	159253189	159253468	280	*	28	147	ENSG00000170214	405.851	1.01379	0.00355953	ADRA1B
227	chr5	159332516	159333064	549	*	210	147	ENSG00000170214	405.851	1.01379	0.00355953	ADRA1B
228	chr5	165499698	165499975	278	*	35	57451	ENSG00000145934	351.633	3.49305	2.55e-13	TENM2
229	chr5	165767142	165767458	317	*	134	57451	ENSG00000145934	351.633	3.49305	2.55e-13	TENM2
230	chr5	165784591	165786011	1421	*	3304	57451	ENSG00000145934	351.633	3.49305	2.55e-13	TENM2
231	chr5	169213301	169213653	353	*	197	1794	ENSG00000134516	1547.34	1.36734	2.99363e-19	DOCK2
232	chr5	169397953	169398353	401	*	40	100131897	ENSG00000204767	326.646	2.6925	5.1683e-29	INSYN2B
233	chr6	3797982	3798238	257	*	19	221749	ENSG00000168994	1898.91	1.88443	2.79889e-99	PXDC1
234	chr6	11277458	11277725	268	*	142	4739	ENSG00000111859	1801.1	1.76285	2.41155e-55	NEDD9
235	chr6	11653213	11653675	463	*	133	84830	ENSG00000111863	17.7578	1.87552	0.000140953	ADTRP
236	chr6	17278821	17279118	298	*	35	221662	ENSG00000112183	126.653	2.64191	1.65407e-17	RBM24
237	chr6	26055282	26055574	293	*	95	3006	ENSG00000187837	590.506	1.05753	2.3707e-07	HIST1H1C
238	chr6	71959848	71960195	348	*	62	79627	ENSG00000119900	1421.08	2.66578	8.27932e-57	OGFRL1
239	chr6	75915759	75916078	320	*	85	1303	ENSG00000111799	7146.72	1.66992	1.10681e-35	COL12A1
240	chr6	86113468	86113781	314	*	155	4907	ENSG00000135318	5643.19	1.09848	2.44881e-11	NT5E
241	chr6	114338324	114338625	302	*	242	222537	ENSG00000249853	7.6383	4.49499	3.05408e-05	HS3ST5
242	chr6	132272505	132272761	257	*	277	1490	ENSG00000118523	8122.71	4.82824	3.60593e-137	CCN2
243	chr6	168962029	168962401	373	*	12	64094	ENSG00000112562	58.3939	1.06121	0.0343676	SMOC2
244	chr7	501135	501578	444	*	338	5154	ENSG00000197461	1396.48	1.06527	1.53727e-13	PDGFA
245	chr7	1576704	1577115	412	*	213	7975	ENSG00000198517	1886.64	1.8534	2.54718e-64	MAFK
246	chr7	6322756	6323770	1015	*	164	9265	ENSG00000008256	8882.57	1.82616	7.91397e-130	CYTH3
247	chr7	6324193	6324739	547	*	47	9265	ENSG00000008256	8882.57	1.82616	7.91397e-130	CYTH3
248	chr7	6327785	6328055	271	*	42	9265	ENSG00000008256	8882.57	1.82616	7.91397e-130	CYTH3
249	chr7	6346258	6346537	280	*	34	9265	ENSG00000008256	8882.57	1.82616	7.91397e-130	CYTH3
250	chr7	12700114	12700403	290	*	160	10124	ENSG00000122644	624.351	1.40805	7.4384e-23	ARL4A
251	chr7	24739878	24740240	363	*	102	1687	ENSG00000105928	2169.26	1.20824	1.32376e-23	GSDME
252	chr7	32155441	32155729	289	*	335	5137	ENSG00000154678	3542.72	2.01427	1.28034e-26	PDE1C
253	chr7	34019283	34019725	443	*	57	168667	ENSG00000164619	162.733	2.23649	1.13764e-09	BMPER
254	chr7	34026776	34027130	355	*	57	168667	ENSG00000164619	162.733	2.23649	1.13764e-09	BMPER
255	chr7	41296451	41296799	349	*	21	285954	ENSG00000224116	14.9961	2.07886	0.000644319	INHBA-AS1
256	chr7	41956330	41956671	342	*	59	3624	ENSG00000122641	62.2871	2.76967	3.29317e-26	INHBA
257	chr7	47803070	47803413	344	*	21	84847	ENSG00000146666	14.5927	3.40197	1.5966e-07	LINC00525
258	chr7	47826082	47826630	549	*	515	80099	ENSG00000136275	6.78884	3.86171	0.000152938	C7orf69
259	chr7	48122982	48123264	283	*	34	7378	ENSG00000183696	3542.44	1.72268	1.47913e-17	UPP1
260	chr7	76050343	76050697	355	*	133	7784	ENSG00000188372	653.848	1.10916	1.0458e-13	ZP3
261	chr7	98450303	98450698	396	*	24	222865	ENSG00000166448	81.1848	3.26874	2.20959e-18	TMEM130
262	chr7	98462978	98463509	532	*	565	222865	ENSG00000166448	81.1848	3.26874	2.20959e-18	TMEM130
263	chr7	100765284	100765588	305	*	153	5054	ENSG00000106366	2089.77	3.64913	5.25418e-112	SERPINE1
264	chr7	115994831	115995441	611	*	288	858	ENSG00000105971	2124.49	1.94852	1.66629e-58	CAV2
265	chr7	116152279	116152885	607	*	41	857	ENSG00000105974	23107.4	2.19667	4.63573e-72	CAV1
266	chr7	128470372	128470710	339	*	46	2318	ENSG00000128591	24286.4	1.7721	1.42945e-44	FLNC
267	chr7	131222771	131223571	801	*	116	5420	ENSG00000128567	5988.65	1.50043	2.40769e-25	PODXL
268	chr7	131338876	131339512	637	*	101	5420	ENSG00000128567	5988.65	1.50043	2.40769e-25	PODXL
269	chr7	135443008	135443310	303	*	35	389558	ENSG00000189320	81.8817	2.17589	7.33562e-08	FAM180A
270	chr7	140325982	140326484	503	*	320	27147	ENSG00000146966	3519.22	1.39483	7.79201e-28	DENND2A
271	chr7	143067173	143067524	352	*	174	9715	ENSG00000159784	590.295	1.84474	9.64054e-41	FAM131B
272	chr7	150723100	150723397	298	*	19	285973	ENSG00000181652	118.269	1.07656	0.0127237	ATG9B
273	chr7	151297124	151297379	256	*	147	51422	ENSG00000106617	1255.56	2.30925	1.54881e-67	PRKAG2
274	chr7	151384709	151385121	413	*	262	51422	ENSG00000106617	1255.56	2.30925	1.54881e-67	PRKAG2
275	chr7	151439876	151440200	325	*	81	51422	ENSG00000106617	1255.56	2.30925	1.54881e-67	PRKAG2
276	chr7	151451244	151451638	395	*	877	51422	ENSG00000106617	1255.56	2.30925	1.54881e-67	PRKAG2
277	chr7	157101776	157102060	285	*	153	10049	ENSG00000105993	11954.6	1.01403	5.57504e-52	DNAJB6
278	chr7	157102547	157102999	453	*	155	10049	ENSG00000105993	11954.6	1.01403	5.57504e-52	DNAJB6
279	chr8	8395155	8395490	336	*	51	157285	ENSG00000275342	3099.32	1.09314	1.14315e-12	PRAG1
280	chr8	26014830	26015136	307	*	31	64641	ENSG00000221818	15.1697	1.42681	0.0145199	EBF2
281	chr8	37000437	37001059	623	*	95	157855	ENSG00000215262	6.1493	5.03063	0.00188727	KCNU1
282	chr8	86777505	86777898	394	*	23	254958	ENSG00000205176	16.2111	5.74128	0.000567445	REXO1L1P
283	chr8	86796533	86796824	292	*	12	254958	ENSG00000205176	16.2111	5.74128	0.000567445	REXO1L1P
284	chr8	86831537	86831838	302	*	14	254958	ENSG00000205176	16.2111	5.74128	0.000567445	REXO1L1P
285	chr8	102039342	102039846	505	*	69	441374	ENSG00000248599	5.2134	5.18137	0.000677435	AC018781.1
286	chr8	118859969	118860266	298	*	46	2131	ENSG00000182197	6550.5	1.20375	1.28869e-21	EXT1
287	chr8	118953013	118953333	321	*	143	2131	ENSG00000182197	6550.5	1.20375	1.28869e-21	EXT1
288	chr8	119037362	119037626	265	*	11	2131	ENSG00000182197	6550.5	1.20375	1.28869e-21	EXT1
289	chr8	119345170	119345503	334	*	353	2131	ENSG00000182197	6550.5	1.20375	1.28869e-21	EXT1
290	chr8	128866268	128866659	392	*	133	5820	ENSG00000249859	340.497	1.22346	1.00774e-08	PVT1
291	chr8	128919904	128920393	490	*	208	5820	ENSG00000249859	340.497	1.22346	1.00774e-08	PVT1
292	chr8	128930920	128931185	266	*	66	5820	ENSG00000249859	340.497	1.22346	1.00774e-08	PVT1
293	chr8	131495578	131495937	360	*	394	50807	ENSG00000153317	7407.4	1.08037	4.67241e-27	ASAP1
294	chr8	131536926	131537264	339	*	95	50807	ENSG00000153317	7407.4	1.08037	4.67241e-27	ASAP1
295	chr8	142164137	142164445	309	*	77	22898	ENSG00000105339	1469.52	1.35242	1.20471e-43	DENND3
296	chr9	5446945	5447411	467	*	51	29126	ENSG00000120217	323.624	2.97202	5.07779e-54	CD274
297	chr9	5509580	5509899	320	*	108	80380	ENSG00000197646	137.941	1.59767	7.36295e-10	PDCD1LG2
298	chr9	12814390	12814655	266	*	26	286343	ENSG00000153714	175.711	2.09968	3.21645e-14	LURAP1L
299	chr9	35518187	35518497	311	*	642	9853	ENSG00000198853	2608.47	1.73012	4.61923e-100	RUSC2
300	chr9	38017295	38017614	320	*	150	6461	ENSG00000107338	1465.47	1.27763	4.32068e-18	SHB
301	chr9	38046868	38047547	680	*	86	6461	ENSG00000107338	1465.47	1.27763	4.32068e-18	SHB
302	chr9	38443304	38443719	416	*	54	347252	ENSG00000137142	580.178	2.14122	6.9327e-65	IGFBPL1
303	chr9	38681842	38682957	1116	*	301	158228	ENSG00000204860	45.6417	3.43691	1.52383e-12	FAM201A
304	chr9	74755450	74755735	286	*	33	9615	ENSG00000119125	761.697	2.55535	9.98697e-40	GDA
305	chr9	100639312	100639728	417	*	62	2304	ENSG00000178919	349.402	2.29811	3.58159e-37	FOXE1
306	chr9	100985523	100985914	392	*	1108	55357	ENSG00000095383	462.515	2.18811	4.24017e-48	TBC1D2
307	chr9	110517251	110517857	607	*	127	9314	ENSG00000136826	330.165	1.56021	7.4154e-08	KLF4
308	chr9	112813243	112813522	280	*	33	11217	ENSG00000241978	11074.5	1.02232	2.11854e-31	AKAP2
309	chr9	112878372	112878672	301	*	38	11217	ENSG00000241978	11074.5	1.02232	2.11854e-31	AKAP2
310	chr9	114490989	114491312	324	*	38	158401	ENSG00000165181	8.46987	2.42934	0.0334917	SHOC1
311	chr9	117566629	117567069	441	*	300	9966	ENSG00000181634	89.0339	1.19509	0.000229856	TNFSF15
312	chr9	127048280	127048972	693	*	125	10783	ENSG00000119408	8959.61	1.08721	1.05457e-25	NEK6
313	chr9	127071997	127072265	269	*	395	10783	ENSG00000119408	8959.61	1.08721	1.05457e-25	NEK6
314	chr9	133837918	133838229	312	*	21	84929	ENSG00000130720	129.113	1.46915	2.55113e-08	FIBCD1
315	chrX	10415805	10416114	310	*	43	4281	ENSG00000101871	1581.45	1.15693	2.39622e-23	MID1
316	chrX	48345644	48346099	456	*	197	24140	ENSG00000068438	3401.26	1.04442	1.0399e-42	FTSJ1
317	chrX	128756857	128757159	303	*	51	8862	ENSG00000171388	612.381	2.74358	5.38369e-27	APLN
318	chrX	133803925	133804379	455	*	67	10761	ENSG00000170965	82.0856	2.94763	3.74106e-32	PLAC1
319	chrX	139805465	139805789	325	*	70	286411	ENSG00000203930	86.5282	1.68989	1.83376e-10	LINC00632
320	chrX	139806485	139806748	264	*	55	286411	ENSG00000203930	86.5282	1.68989	1.83376e-10	LINC00632
321	chrX	153597303	153598110	808	*	35	2316	ENSG00000196924	161615	1.44841	4.76765e-61	FLNA

## Sheet: TAZ-CAMTA1_ChIP_RNAseq_merged
	seqnames	start	end	width	strand	V5	geneId	ENSEMBL	baseMean	log2FoldChange	padj	Gene
1	chr1	16470691	16473814	3124	*	143	1969	ENSG00000142627	5020.24	0.501333	0.000612835	EPHA2
2	chr1	16500171	16500446	276	*	130	1969	ENSG00000142627	5020.24	0.501333	0.000612835	EPHA2
3	chr1	26745568	26745877	310	*	20	79727	ENSG00000131914	640.034	0.464931	0.0116243	LIN28A
4	chr1	27319850	27320229	380	*	60	388610	ENSG00000253368	1601.23	0.523867	0.00389772	TRNP1
5	chr1	27325825	27326224	400	*	98	388610	ENSG00000253368	1601.23	0.523867	0.00389772	TRNP1
6	chr1	28764542	28764887	346	*	69	65979	ENSG00000204138	2601.1	0.507389	9.70537e-12	PHACTR4
7	chr1	43672425	43672985	561	*	229	10969	ENSG00000117395	5155.5	-0.289743	0.0307495	EBNA1BP2
8	chr1	48035652	48035948	297	*	123	2306	ENSG00000186564	276.81	0.406688	0.00742505	FOXD2
9	chr1	85666871	85668161	1291	*	392	84144	ENSG00000097096	235.87	1.61446	8.52058e-11	SYDE2
10	chr1	86045969	86047024	1056	*	462	3491	ENSG00000142871	10596.6	1.63658	1.77893e-45	CCN1
11	chr1	86072754	86073248	495	*	69	3491	ENSG00000142871	10596.6	1.63658	1.77893e-45	CCN1
12	chr1	86078137	86078727	591	*	45	3491	ENSG00000142871	10596.6	1.63658	1.77893e-45	CCN1
13	chr1	92202283	92202618	336	*	45	7049	ENSG00000069702	1252.63	0.47461	0.000424856	TGFBR3
14	chr1	94219904	94220360	457	*	60	8412	ENSG00000137936	3028.46	-0.330701	0.0485998	BCAR3
15	chr1	94701686	94701982	297	*	37	9411	ENSG00000137962	4982.78	0.624257	0.00997667	ARHGAP29
16	chr1	94791431	94791703	273	*	30	9411	ENSG00000137962	4982.78	0.624257	0.00997667	ARHGAP29
17	chr1	110419465	110420459	995	*	180	1435	ENSG00000184371	3189.29	0.574135	7.97303e-07	CSF1
18	chr1	145092201	145092948	748	*	211	9554	ENSG00000265808	4612.53	0.215046	0.0422749	SEC22B
19	chr1	151167717	151168396	680	*	218	8394	ENSG00000143398	3765.17	0.524072	1.32465e-06	PIP5K1A
20	chr1	151960675	151961361	687	*	69	6281	ENSG00000197747	12016	0.421689	0.00283557	S100A10
21	chr1	154944978	154945721	744	*	114	6464	ENSG00000160691	17857.7	0.407	0.00256523	SHC1
22	chr1	156866462	156866916	455	*	69	375033	ENSG00000187800	1120.15	1.20428	1.25344e-18	PEAR1
23	chr1	157989200	157989745	546	*	398	55243	ENSG00000183853	10728.7	0.313736	0.0109875	KIRREL1
24	chr1	202558413	202558703	291	*	111	4660	ENSG00000077157	1810.48	0.752705	1.23566e-18	PPP1R12B
25	chr1	214578011	214578393	383	*	30	5784	ENSG00000152104	5617.29	0.650999	2.75952e-18	PTPN14
26	chr1	214725070	214725779	710	*	505	5784	ENSG00000152104	5617.29	0.650999	2.75952e-18	PTPN14
27	chr1	231275423	231276229	807	*	30	440730	ENSG00000119283	26.9508	-1.74176	0.00318276	TRIM67
28	chr10	14116505	14116793	289	*	60	55691	ENSG00000151474	2369.14	-0.448008	3.30471e-05	FRMD4A
29	chr10	95048585	95049037	453	*	164	26509	ENSG00000138119	15695.7	0.711985	5.09576e-07	MYOF
30	chr10	95218439	95218982	544	*	30	26509	ENSG00000138119	15695.7	0.711985	5.09576e-07	MYOF
31	chr10	112170369	112170880	512	*	18	1847	ENSG00000138166	787.259	-0.695421	0.00933959	DUSP5
32	chr11	9685672	9685988	317	*	90	23075	ENSG00000133789	3816.15	0.331996	0.00144267	SWAP70
33	chr11	12398728	12399341	614	*	444	55742	ENSG00000197702	12811.8	0.74527	1.38415e-47	PARVA
34	chr11	12439588	12440294	707	*	39	55742	ENSG00000197702	12811.8	0.74527	1.38415e-47	PARVA
35	chr11	12578393	12578738	346	*	142	7003	ENSG00000187079	10940	0.802215	5.71262e-07	TEAD1
36	chr11	12695648	12696339	692	*	554	7003	ENSG00000187079	10940	0.802215	5.71262e-07	TEAD1
37	chr11	12824088	12824355	268	*	45	7003	ENSG00000187079	10940	0.802215	5.71262e-07	TEAD1
38	chr11	12915216	12915827	612	*	37	7003	ENSG00000187079	10940	0.802215	5.71262e-07	TEAD1
39	chr11	14443839	14444215	377	*	191	22800	ENSG00000133818	2136.44	0.635847	1.86337e-09	RRAS2
40	chr11	19391844	19392220	377	*	77	89797	ENSG00000166833	2387.67	-0.368434	0.0275091	NAV2
41	chr11	36171351	36171636	286	*	76	143458	ENSG00000179241	1672.49	-0.324929	0.0443742	LDLRAD3
42	chr11	44009067	44009525	459	*	37	387763	ENSG00000187479	147.521	0.51896	0.0425006	C11orf96
43	chr11	46312294	46312889	596	*	153	90993	ENSG00000157613	742.929	1.21006	8.88048e-16	CREB3L1
44	chr11	46316827	46317184	358	*	38	90993	ENSG00000157613	742.929	1.21006	8.88048e-16	CREB3L1
45	chr11	62276155	62276573	419	*	51	79026	ENSG00000124942	122265	0.565724	1.15239e-09	AHNAK
46	chr11	62312607	62313996	1390	*	146	79026	ENSG00000124942	122265	0.565724	1.15239e-09	AHNAK
47	chr11	62320800	62321240	441	*	38	79026	ENSG00000124942	122265	0.565724	1.15239e-09	AHNAK
48	chr11	67780335	67781497	1163	*	373	221	ENSG00000006534	1300.36	0.41211	0.000929458	ALDH3B1
49	chr11	85780367	85780966	600	*	54	8301	ENSG00000073921	8631.63	0.388764	0.00520168	PICALM
50	chr11	94470403	94470880	478	*	69	154810	ENSG00000166025	6561.4	-0.346688	0.00597216	AMOTL1
51	chr11	101980790	101981077	288	*	11	10413	ENSG00000137693	7292.14	0.325414	0.00202403	YAP1
52	chr11	101982302	101982654	353	*	45	10413	ENSG00000137693	7292.14	0.325414	0.00202403	YAP1
53	chr11	102139149	102139523	375	*	90	330	ENSG00000023445	138.571	0.635553	0.0377052	BIRC3
54	chr11	113423910	113424358	449	*	146	1813	ENSG00000149295	181.345	-0.933802	0.000126221	DRD2
55	chr11	121337186	121337565	380	*	52	6653	ENSG00000137642	4958.87	0.79394	1.01367e-08	SORL1
56	chr11	125260776	125261290	515	*	101	63876	ENSG00000165495	537.562	0.689963	0.000102096	PKNOX2
57	chr11	128584864	128585765	902	*	77	100507392	ENSG00000254703	247.901	-0.506408	0.0025952	SENCR
58	chr11	130348299	130349056	758	*	38	170689	ENSG00000166106	608.323	0.857622	1.99931e-10	ADAMTS15
59	chr11	130350333	130350607	275	*	12	170689	ENSG00000166106	608.323	0.857622	1.99931e-10	ADAMTS15
60	chr12	1714807	1715268	462	*	52	81029	ENSG00000111186	481.159	0.771411	0.00118377	WNT5B
61	chr12	12419925	12420296	372	*	378	4040	ENSG00000070018	2588.51	0.426105	0.00560745	LRP6
62	chr12	48214295	48214642	348	*	89	51564	ENSG00000061273	5153.46	0.241598	0.0226575	HDAC7
63	chr12	52585646	52586238	593	*	174	144501	ENSG00000167767	1730.68	0.987494	0.000816918	KRT80
64	chr12	53318538	53319368	831	*	69	3856	ENSG00000170421	14283.6	1.47745	1.15028e-37	KRT8
65	chr12	53339108	53339865	758	*	69	3875	ENSG00000111057	26282.3	0.652417	7.14253e-07	KRT18
66	chr12	56614848	56615309	462	*	30	10193	ENSG00000181852	3274.28	0.474768	0.0493946	RNF41
67	chr12	65672464	65672880	417	*	23	253827	ENSG00000174099	1780.2	0.718677	1.86003e-08	MSRB3
68	chr12	94179180	94179599	420	*	30	8738	ENSG00000169372	389.304	-0.324776	0.0491051	CRADD
69	chr12	104612982	104613669	688	*	77	7296	ENSG00000198431	33083.7	0.535282	0.0348803	TXNRD1
70	chr12	106424495	106424846	352	*	114	9891	ENSG00000074590	3145.05	0.540339	5.54788e-05	NUAK1
71	chr12	106468366	106469154	789	*	77	9891	ENSG00000074590	3145.05	0.540339	5.54788e-05	NUAK1
72	chr12	106477725	106478039	315	*	86	9891	ENSG00000074590	3145.05	0.540339	5.54788e-05	NUAK1
73	chr12	106517472	106517733	262	*	60	9891	ENSG00000074590	3145.05	0.540339	5.54788e-05	NUAK1
74	chr12	120524622	120524935	314	*	95	92558	ENSG00000135127	37.5426	1.67084	0.0100226	BICDL1
75	chr13	21635103	21635912	810	*	361	26524	ENSG00000150457	922.068	1.52422	2.64391e-42	LATS2
76	chr13	78549376	78549892	517	*	33	1910	ENSG00000136160	780.204	1.65793	1.23155e-33	EDNRB
77	chr13	80510585	80511317	733	*	52	10253	ENSG00000136158	1269.95	-0.490081	0.000272692	SPRY2
78	chr13	81030328	81030675	348	*	20	10253	ENSG00000136158	1269.95	-0.490081	0.000272692	SPRY2
79	chr13	97774389	97775392	1004	*	60	10150	ENSG00000139793	5478.88	0.642447	0.0185178	MBNL2
80	chr13	97845914	97847006	1093	*	94	10150	ENSG00000139793	5478.88	0.642447	0.0185178	MBNL2
81	chr13	97874681	97876342	1662	*	25	10150	ENSG00000139793	5478.88	0.642447	0.0185178	MBNL2
82	chr13	97908526	97908826	301	*	22	10150	ENSG00000139793	5478.88	0.642447	0.0185178	MBNL2
83	chr13	97910015	97911140	1126	*	44	10150	ENSG00000139793	5478.88	0.642447	0.0185178	MBNL2
84	chr13	97927088	97927361	274	*	67	10150	ENSG00000139793	5478.88	0.642447	0.0185178	MBNL2
85	chr13	97959831	97961450	1620	*	345	10150	ENSG00000139793	5478.88	0.642447	0.0185178	MBNL2
86	chr13	97980281	97980794	514	*	65	10150	ENSG00000139793	5478.88	0.642447	0.0185178	MBNL2
87	chr14	23449613	23450968	1356	*	1429	84962	ENSG00000129474	9629.72	1.53981	7.72263e-18	AJUBA
88	chr14	23451833	23452477	645	*	885	84962	ENSG00000129474	9629.72	1.53981	7.72263e-18	AJUBA
89	chr14	55031972	55032386	415	*	12	23034	ENSG00000020577	2581.58	0.551401	0.000291521	SAMD4A
90	chr14	55118581	55119512	932	*	311	23034	ENSG00000020577	2581.58	0.551401	0.000291521	SAMD4A
91	chr14	55240189	55240475	287	*	52	23034	ENSG00000020577	2581.58	0.551401	0.000291521	SAMD4A
92	chr14	75761947	75762206	260	*	15	731223	ENSG00000259687	13.8709	2.26169	0.0391109	LINC01220
93	chr14	89021184	89021544	361	*	104	11099	ENSG00000070778	1232.53	0.738053	1.05392e-12	AL162171.1
94	chr14	102746509	102747063	555	*	30	5891	ENSG00000080823	1296.65	-0.279383	0.0491822	MOK
95	chr15	57719653	57720169	517	*	102	84952	ENSG00000128849	895.542	0.676047	6.57469e-05	CGNL1
96	chr15	58839441	58839708	268	*	17	102	ENSG00000137845	7600.93	0.319506	0.0377156	ADAM10
97	chr15	63268526	63269190	665	*	60	7168	ENSG00000140416	23789.7	0.547885	1.12143e-05	TPM1
98	chr15	63337020	63337462	443	*	96	7168	ENSG00000140416	23789.7	0.547885	1.12143e-05	TPM1
99	chr15	69706738	69707872	1135	*	69	9493	ENSG00000137807	4117.41	0.585719	0.00297496	KIF23
100	chr15	77436810	77437535	726	*	69	79834	ENSG00000173517	4818.64	0.339659	0.000606986	PEAK1
101	chr15	79296668	79296972	305	*	60	5923	ENSG00000058335	134.707	0.901626	0.0381216	RASGRF1
102	chr15	83478872	83479421	550	*	23	123720	ENSG00000156232	724.845	0.597113	0.000154263	WHAMM
103	chr16	122632	123022	391	*	105	64285	ENSG00000007384	1735.66	0.650598	1.39191e-07	RHBDF1
104	chr16	3070424	3071127	704	*	69	51330	ENSG00000006327	3033.22	0.915044	1.05905e-07	TNFRSF12A
105	chr16	3071665	3072737	1073	*	174	51330	ENSG00000006327	3033.22	0.915044	1.05905e-07	TNFRSF12A
106	chr16	46782372	46782661	290	*	40	91807	ENSG00000140795	310.161	0.921676	1.32276e-06	MYLK3
107	chr16	66908556	66909073	518	*	52	57546	ENSG00000172840	1653.37	0.289004	0.017457	PDP2
108	chr16	68679683	68680140	458	*	52	1001	ENSG00000062038	1193.52	1.00991	1.75044e-14	CDH3
109	chr17	783017	783542	526	*	93	64359	ENSG00000167693	1791.1	0.728753	5.76866e-08	NXN
110	chr17	836637	836916	280	*	174	64359	ENSG00000167693	1791.1	0.728753	5.76866e-08	NXN
111	chr17	854803	855462	660	*	261	64359	ENSG00000167693	1791.1	0.728753	5.76866e-08	NXN
112	chr17	1391299	1391915	617	*	995	4641	ENSG00000197879	10838.9	0.554021	4.06152e-05	MYO1C
113	chr17	3571288	3571708	421	*	120	30851	ENSG00000213977	4806.33	0.416893	0.00871835	TAX1BP3
114	chr17	7254529	7255474	946	*	573	147040	ENSG00000213859	1277.42	0.641682	4.07172e-05	KCTD11
115	chr17	8287787	8288752	966	*	30	6154	ENSG00000161970	31543.4	-0.29968	0.00205281	RPL26
116	chr17	9551502	9552052	551	*	153	124739	ENSG00000154914	231.423	0.675464	0.00225552	USP43
117	chr17	33760201	33760832	632	*	133	55106	ENSG00000172123	950.486	0.436485	0.0134053	SLFN12
118	chr17	36607100	36607720	621	*	744	57636	ENSG00000275832	5404.48	0.72726	8.18633e-15	ARHGAP23
119	chr17	36620868	36621397	530	*	75	57636	ENSG00000275832	5404.48	0.72726	8.18633e-15	ARHGAP23
120	chr17	40575233	40575965	733	*	398	284119	ENSG00000177469	22717.4	1.1865	3.85223e-18	CAVIN1
121	chr17	47913737	47914249	513	*	52	729220	ENSG00000204584	22.0443	1.56664	0.0147984	FLJ45513
122	chr17	48287766	48288048	283	*	139	1277	ENSG00000108821	951.61	1.03645	0.000266133	COL1A1
123	chr17	48296272	48296659	388	*	30	1277	ENSG00000108821	951.61	1.03645	0.000266133	COL1A1
124	chr17	55952432	55953028	597	*	275	51649	ENSG00000181610	2563.61	-0.257189	0.0137852	MRPS23
125	chr17	57232047	57232686	640	*	185	348235	ENSG00000182628	1597.5	0.659043	2.83699e-07	SKA2
126	chr17	73549106	73549585	480	*	174	3993	ENSG00000073350	1015.84	0.422493	0.00107209	LLGL2
127	chr17	81066619	81067385	767	*	152	284207	ENSG00000176845	538.626	0.437518	0.0474523	METRNL
128	chr18	3261453	3262365	913	*	1036	103910	ENSG00000118680	10882.2	0.398696	5.36217e-09	MYL12B
129	chr18	10925846	10926263	418	*	45	63895	ENSG00000154864	3798.18	0.249504	0.0302424	PIEZO2
130	chr18	12308451	12308825	375	*	67	84617	ENSG00000176014	6630.39	0.499509	0.022078	TUBB6
131	chr18	77725352	77725768	417	*	45	440498	ENSG00000226742	284.455	0.913163	9.31621e-07	HSBP1L1
132	chr19	1027936	1028849	914	*	164	1265	ENSG00000064666	8063.88	0.576528	5.20546e-09	CNN2
133	chr19	2540320	2541524	1205	*	889	4616	ENSG00000099860	977.097	0.629185	3.59317e-06	GADD45B
134	chr19	2578785	2579220	436	*	46	4616	ENSG00000099860	977.097	0.629185	3.59317e-06	GADD45B
135	chr19	6744832	6745182	351	*	69	9322	ENSG00000125733	3342.1	0.244376	0.00117605	TRIP10
136	chr19	15217867	15218127	261	*	69	85360	ENSG00000105137	3531.24	0.836982	1.79878e-10	SYDE1
137	chr19	17403331	17403630	300	*	60	126549	ENSG00000160117	635.535	-0.475131	0.000360556	ANKLE1
138	chr19	34971987	34972691	705	*	1010	126374	ENSG00000142279	955.442	2.45537	7.65694e-39	WTIP
139	chr19	40029827	40030125	299	*	30	163126	ENSG00000176396	658.235	0.556617	1.13245e-08	EID2
140	chr19	48222464	48223086	623	*	323	30846	ENSG00000024422	10312.9	0.696998	5.36217e-09	EHD2
141	chr19	54362249	54362538	290	*	52	91663	ENSG00000179820	3260.6	0.450078	0.00169011	MYADM
142	chr2	11294959	11295219	261	*	23	130814	ENSG00000162976	634.468	0.329359	0.0347988	PQLC3
143	chr2	11484979	11485525	547	*	114	9475	ENSG00000134318	3281.84	0.69903	0.0225689	ROCK2
144	chr2	20212343	20212760	418	*	82	4148	ENSG00000132031	531.015	1.68147	6.60535e-31	MATN3
145	chr2	28619533	28620004	472	*	174	2355	ENSG00000075426	5985.01	0.329458	0.0268107	FOSL2
146	chr2	36598512	36599788	1277	*	104	51232	ENSG00000150938	9816.06	0.573925	1.42973e-05	CRIM1
147	chr2	36608141	36608427	287	*	69	51232	ENSG00000150938	9816.06	0.573925	1.42973e-05	CRIM1
148	chr2	54892808	54893067	260	*	17	6711	ENSG00000115306	22759.7	0.298873	2.33044e-06	SPTBN1
149	chr2	64881252	64882185	934	*	524	9792	ENSG00000179833	1650.9	0.378769	0.00600851	SERTAD2
150	chr2	64995020	64995286	267	*	38	9792	ENSG00000179833	1650.9	0.378769	0.00600851	SERTAD2
151	chr2	102422721	102423005	285	*	30	9448	ENSG00000071054	13426.5	-0.208572	0.00932552	MAP4K4
152	chr2	121672588	121673530	943	*	123	2736	ENSG00000074047	1186.16	0.639347	0.00337494	GLI2
153	chr2	121692915	121693341	427	*	60	2736	ENSG00000074047	1186.16	0.639347	0.00337494	GLI2
154	chr2	121694657	121695161	505	*	23	2736	ENSG00000074047	1186.16	0.639347	0.00337494	GLI2
155	chr2	128432859	128433243	385	*	34	55679	ENSG00000072163	478.474	3.03127	2.36684e-63	LIMS2
156	chr2	159314442	159315041	600	*	211	8502	ENSG00000144283	3485.23	0.552512	2.56574e-05	PKP4
157	chr2	201983011	201983757	747	*	86	8837	ENSG00000003402	2074.94	0.16376	0.045758	CFLAR
158	chr2	202897750	202898370	621	*	143	8324	ENSG00000155760	2542.47	0.425687	1.12323e-05	FZD7
159	chr2	235890038	235890450	413	*	287	23677	ENSG00000130147	4262.93	0.357853	0.00680267	SH3BP4
160	chr2	235905190	235905827	638	*	45	23677	ENSG00000130147	4262.93	0.357853	0.00680267	SH3BP4
161	chr2	238223793	238224104	312	*	133	1293	ENSG00000163359	4751.93	-0.722642	0.0186444	COL6A3
162	chr2	238341290	238341615	326	*	45	1293	ENSG00000163359	4751.93	-0.722642	0.0186444	COL6A3
163	chr20	17951957	17952911	955	*	94	92667	ENSG00000125871	2856.93	0.254718	0.0066301	MGME1
164	chr20	30300377	30301599	1223	*	152	598	ENSG00000171552	5620.75	0.387192	0.000112018	BCL2L1
165	chr20	30307845	30308569	725	*	180	598	ENSG00000171552	5620.75	0.387192	0.000112018	BCL2L1
166	chr20	32497279	32497654	376	*	123	22913	ENSG00000125970	10373.4	-0.313037	0.020549	RALY
167	chr20	36536186	36536704	519	*	54	128434	ENSG00000132821	409.495	1.77411	1.76166e-20	VSTM2L
168	chr20	52790525	52790851	327	*	37	1591	ENSG00000019186	230.735	-1.95078	5.03713e-15	CYP24A1
169	chr20	62066261	62066597	337	*	85	3785	ENSG00000075043	12.2646	-1.50662	0.0364689	KCNQ2
170	chr21	18899958	18900225	268	*	45	1525	ENSG00000154639	430.958	2.1521	6.15507e-33	CXADR
171	chr21	35899149	35899617	469	*	86	1827	ENSG00000159200	3868.5	1.0051	8.30648e-13	RCAN1
172	chr21	46348705	46349043	339	*	37	3689	ENSG00000160255	124.991	1.72647	8.09106e-06	ITGB2
173	chr22	36725465	36726120	656	*	95	4627	ENSG00000100345	39701.7	0.404891	0.00163367	MYH9
174	chr22	36764587	36765371	785	*	143	4627	ENSG00000100345	39701.7	0.404891	0.00163367	MYH9
175	chr22	38614686	38615080	395	*	153	23764	ENSG00000185022	607.032	0.546795	0.0366334	MAFF
176	chr22	41686719	41687035	317	*	114	5905	ENSG00000100401	7733.94	-0.335706	0.000508296	RANGAP1
177	chr22	50731767	50732557	791	*	584	23654	ENSG00000196576	10147.4	0.477988	2.85318e-05	PLXNB2
178	chr3	16525302	16526428	1127	*	133	23180	ENSG00000131378	2508.13	0.636016	3.49116e-07	RFTN1
179	chr3	49506637	49507329	693	*	107	1605	ENSG00000173402	8402.8	0.88971	7.44105e-15	DAG1
180	chr3	50301808	50302548	741	*	102	7869	ENSG00000012171	1213.28	1.465	1.64355e-11	SEMA3B
181	chr3	58033690	58034187	498	*	68	2317	ENSG00000136068	29152.8	0.61599	8.17241e-05	FLNB
182	chr3	124782026	124782362	337	*	114	57493	ENSG00000173706	10780.5	0.472637	1.13245e-08	HEG1
183	chr3	134032225	134032601	377	*	123	51421	ENSG00000114019	5194.21	2.3241	3.43776e-118	AMOTL2
184	chr3	134045636	134046173	538	*	261	51421	ENSG00000114019	5194.21	2.3241	3.43776e-118	AMOTL2
185	chr3	134076332	134076949	618	*	192	51421	ENSG00000114019	5194.21	2.3241	3.43776e-118	AMOTL2
186	chr3	134077317	134077625	309	*	10	51421	ENSG00000114019	5194.21	2.3241	3.43776e-118	AMOTL2
187	chr3	134082696	134083239	544	*	645	51421	ENSG00000114019	5194.21	2.3241	3.43776e-118	AMOTL2
188	chr3	134092213	134093797	1585	*	961	51421	ENSG00000114019	5194.21	2.3241	3.43776e-118	AMOTL2
189	chr3	170469452	170469769	318	*	114	200916	ENSG00000163584	2206.74	-0.371962	0.0157084	RPL22L1
190	chr4	7912518	7912776	259	*	23	60312	ENSG00000196526	8267.21	0.341407	0.00303732	AFAP1
191	chr5	956680	957627	948	*	233	100506688	ENSG00000215246	130.567	1.32053	8.62083e-06	AC116351.1
192	chr5	16890183	16890440	258	*	21	4651	ENSG00000145555	14327.8	0.350396	0.00396933	MYO10
193	chr5	17169474	17169762	289	*	28	10409	ENSG00000176788	2291.35	0.664324	0.000293105	BASP1
194	chr5	32224101	32224370	270	*	94	64083	ENSG00000113384	5308.92	0.157076	0.0272503	GOLPH3
195	chr5	33736408	33736681	274	*	39	81792	ENSG00000151388	10377	0.424654	0.00056721	ADAMTS12
196	chr5	33892176	33893068	893	*	71	81792	ENSG00000151388	10377	0.424654	0.00056721	ADAMTS12
197	chr5	38765596	38766327	732	*	108	9180	ENSG00000145623	15770.7	0.517522	0.00029706	OSMR
198	chr5	38783291	38783609	319	*	56	9180	ENSG00000145623	15770.7	0.517522	0.00029706	OSMR
199	chr5	38845886	38846339	454	*	122	9180	ENSG00000145623	15770.7	0.517522	0.00029706	OSMR
200	chr5	39423971	39425270	1300	*	246	1601	ENSG00000153071	9628.49	0.346702	0.00070423	DAB2
201	chr5	52160527	52160818	292	*	30	3672	ENSG00000213949	11661.1	0.742437	8.83924e-08	ITGA1
202	chr5	54455975	54456254	280	*	52	493869	ENSG00000164294	5676.18	0.757085	8.60955e-09	GPX8
203	chr5	55864863	55865176	314	*	88	4214	ENSG00000095015	6834.52	-0.367286	0.00810015	MAP3K1
204	chr5	56988528	56989496	969	*	76	345651	ENSG00000169067	62.3757	-1.59429	0.0029887	ACTBL2
205	chr5	57137449	57138090	642	*	113	345651	ENSG00000169067	62.3757	-1.59429	0.0029887	ACTBL2
206	chr5	57312239	57312566	328	*	81	10769	ENSG00000145632	8444.08	-0.400474	0.00398859	PLK2
207	chr5	68797782	68798216	435	*	126	100506658	ENSG00000197822	724.086	1.6527	1.58615e-12	OCLN
208	chr5	135329471	135329793	323	*	37	7045	ENSG00000120708	26371.5	-0.392035	0.0117688	TGFBI
209	chr5	135347543	135348276	734	*	47	7045	ENSG00000120708	26371.5	-0.392035	0.0117688	TGFBI
210	chr5	135393248	135394350	1103	*	292	7045	ENSG00000120708	26371.5	-0.392035	0.0117688	TGFBI
211	chr5	150016653	150017378	726	*	89	11346	ENSG00000171992	2426.23	1.19331	4.52671e-24	SYNPO
212	chr5	150024418	150024971	554	*	93	11346	ENSG00000171992	2426.23	1.19331	4.52671e-24	SYNPO
213	chr5	153747565	153748260	696	*	111	55568	ENSG00000164574	5382.63	0.276776	0.0436186	GALNT10
214	chr5	158635479	158636405	927	*	129	153830	ENSG00000145860	10583.2	0.153704	0.0141792	RNF145
215	chr5	159510283	159510830	548	*	87	114825	ENSG00000170234	1799.66	0.299411	0.0117131	PWWP2A
216	chr5	162886932	162887286	355	*	23	134492	ENSG00000170584	2588.16	0.325009	0.00448541	NUDCD2
217	chr6	37093895	37094450	556	*	104	5292	ENSG00000137193	1122.78	0.888365	0.000227072	PIM1
218	chr6	37105305	37105858	554	*	77	5292	ENSG00000137193	1122.78	0.888365	0.000227072	PIM1
219	chr6	74289898	74290319	422	*	104	26503	ENSG00000119899	973.125	0.444972	0.0334831	SLC17A5
220	chr6	74295491	74296051	561	*	77	26503	ENSG00000119899	973.125	0.444972	0.0334831	SLC17A5
221	chr6	75915126	75915419	294	*	19	1303	ENSG00000111799	7146.72	2.42462	3.61418e-74	COL12A1
222	chr6	75915687	75915967	281	*	18	1303	ENSG00000111799	7146.72	2.42462	3.61418e-74	COL12A1
223	chr6	86388763	86389022	260	*	52	387066	ENSG00000203875	2995.96	-0.370578	0.0155412	SNHG5
224	chr6	132272297	132273024	728	*	385	1490	ENSG00000118523	8122.71	2.54225	4.01469e-37	CCN2
225	chr6	143998853	143999499	647	*	143	9749	ENSG00000112419	1004.3	0.810111	0.000198917	PHACTR2
226	chr6	158402258	158402799	542	*	174	8871	ENSG00000078269	2575.01	0.396261	0.00782822	SYNJ2
227	chr6	163837611	163838004	394	*	37	9444	ENSG00000112531	4899.42	0.632591	4.54929e-05	QKI
228	chr7	1576493	1577559	1067	*	394	7975	ENSG00000198517	1886.64	1.2066	2.81683e-26	MAFK
229	chr7	5631069	5631877	809	*	425	6624	ENSG00000075618	13820.4	0.497157	0.0026157	FSCN1
230	chr7	22600871	22601348	478	*	409	100506178	ENSG00000232759	40.6027	1.64774	4.36046e-06	AC002480.1
231	chr7	22616853	22617235	383	*	60	100506178	ENSG00000232759	40.6027	1.64774	4.36046e-06	AC002480.1
232	chr7	22626202	22626955	754	*	138	100506178	ENSG00000232759	40.6027	1.64774	4.36046e-06	AC002480.1
233	chr7	27135175	27135707	533	*	160	3198	ENSG00000105991	545.361	1.00184	9.00621e-19	HOXA1
234	chr7	30027444	30028753	1310	*	98	9805	ENSG00000136193	19372.3	0.276714	0.00204192	SCRN1
235	chr7	39773417	39773784	368	*	100	349114	ENSG00000188185	516.046	0.360683	0.0398443	LINC00265
236	chr7	42533048	42533614	567	*	29	2737	ENSG00000106571	3529.67	-0.377902	0.00715449	GLI3
237	chr7	55132663	55133075	413	*	61	1956	ENSG00000146648	7757.38	0.1885	0.0456863	EGFR
238	chr7	55133348	55133893	546	*	45	1956	ENSG00000146648	7757.38	0.1885	0.0456863	EGFR
239	chr7	101000819	101001099	281	*	60	136227	ENSG00000160963	362.579	0.528535	0.00675283	COL26A1
240	chr7	101045057	101046005	949	*	230	136227	ENSG00000160963	362.579	0.528535	0.00675283	COL26A1
241	chr7	115994461	115995253	793	*	218	858	ENSG00000105971	2124.49	0.84575	2.20477e-10	CAV2
242	chr7	116151772	116153031	1260	*	67	858	ENSG00000105971	2124.49	0.84575	2.20477e-10	CAV2
243	chr7	116165247	116165638	392	*	38	857	ENSG00000105974	23107.4	0.885928	3.883e-11	CAV1
244	chr7	129934234	129934492	259	*	19	51200	ENSG00000128510	8124.8	1.92986	8.18688e-31	CPA4
245	chr7	130013296	130014253	958	*	262	1357	ENSG00000091704	26.1289	1.4604	0.00623047	CPA1
246	chr7	131546885	131547278	394	*	70	91584	ENSG00000221866	515.422	-0.726103	0.0121013	PLXNA4
247	chr7	134427070	134427416	347	*	90	800	ENSG00000122786	17077	0.632073	2.85844e-05	CALD1
248	chr7	134464064	134464569	506	*	335	800	ENSG00000122786	17077	0.632073	2.85844e-05	CALD1
249	chr7	150065922	150066506	585	*	50	29803	ENSG00000214022	8966.94	0.21662	0.0322122	REPIN1
250	chr7	151384460	151385166	707	*	265	51422	ENSG00000106617	1255.56	0.505866	0.00381482	PRKAG2
251	chr7	151451083	151451720	638	*	649	51422	ENSG00000106617	1255.56	0.505866	0.00381482	PRKAG2
252	chr8	1771745	1772089	345	*	45	9639	ENSG00000104728	3349.75	0.529286	1.26938e-05	ARHGEF10
253	chr8	6451629	6452008	380	*	60	285	ENSG00000091879	85.4312	-0.838797	0.0230961	ANGPT2
254	chr8	22454683	22455558	876	*	683	541565	ENSG00000241852	1572.62	0.436951	0.0398646	C8orf58
255	chr8	27471827	27472407	581	*	54	1191	ENSG00000120885	7930.29	1.00497	7.44105e-15	CLU
256	chr8	37659128	37659509	382	*	57	25960	ENSG00000020181	6548.88	0.262225	0.0312031	ADGRA2
257	chr8	38857155	38857665	511	*	23	8754	ENSG00000168615	9482.94	0.649174	0.000670864	ADAM9
258	chr8	74048447	74048874	428	*	68	157869	ENSG00000164764	767.099	-0.603918	0.00277035	SBSPON
259	chr8	142164055	142164415	361	*	101	22898	ENSG00000105339	1469.52	0.319529	0.0171174	DENND3
260	chr9	707011	707400	390	*	58	23189	ENSG00000107104	4383.02	0.334648	0.000113744	KANK1
261	chr9	5509461	5509868	408	*	22	80380	ENSG00000197646	137.941	0.872332	0.00841613	PDCD1LG2
262	chr9	78987063	78987379	317	*	37	55312	ENSG00000135002	851.805	0.677732	0.00165536	RFK
263	chr9	86046814	86047642	829	*	436	257019	ENSG00000172159	3496.85	0.23797	0.029583	FRMD3
264	chr9	86124470	86124739	270	*	66	257019	ENSG00000172159	3496.85	0.23797	0.029583	FRMD3
265	chr9	86153128	86153406	279	*	29	257019	ENSG00000172159	3496.85	0.23797	0.029583	FRMD3
266	chr9	89990731	89991127	397	*	41	1612	ENSG00000196730	5388.26	0.252181	0.00753329	DAPK1
267	chr9	91149434	91150423	990	*	185	158046	ENSG00000130045	101.711	1.0441	1.34201e-06	NXNL2
268	chr9	97675333	97675718	386	*	27	84909	ENSG00000148120	1301.87	0.835327	9.3821e-16	C9orf3
269	chr9	97684284	97685128	845	*	93	84909	ENSG00000148120	1301.87	0.835327	9.3821e-16	C9orf3
270	chr9	98269647	98270217	571	*	37	5727	ENSG00000185920	1620.68	1.04778	6.46979e-09	PTCH1
271	chr9	100893014	100893273	260	*	10	7464	ENSG00000106789	1356.44	-0.294857	0.00263629	CORO2A
272	chr9	124113550	124113911	362	*	50	2040	ENSG00000148175	8123.48	0.321014	0.000298607	STOM
273	chr9	131314982	131315253	272	*	30	6709	ENSG00000197694	27548.3	1.02346	4.38594e-46	SPTAN1
274	chr9	131316389	131317843	1455	*	255	6709	ENSG00000197694	27548.3	1.02346	4.38594e-46	SPTAN1
275	chr9	131320799	131321311	513	*	93	6709	ENSG00000197694	27548.3	1.02346	4.38594e-46	SPTAN1
276	chr9	134483402	134483665	264	*	32	2889	ENSG00000107263	4833.33	0.486859	3.40776e-06	RAPGEF1
277	chr9	134483975	134484312	338	*	168	2889	ENSG00000107263	4833.33	0.486859	3.40776e-06	RAPGEF1
278	chr9	134609440	134609876	437	*	96	2889	ENSG00000107263	4833.33	0.486859	3.40776e-06	RAPGEF1
279	chr9	137494456	137494750	295	*	183	1289	ENSG00000130635	25458.7	0.439994	0.000154263	COL5A1
280	chrX	152066053	152066588	536	*	557	7739	ENSG00000147394	2431.65	2.63663	5.28588e-135	ZNF185
281	chrX	153597502	153597835	334	*	52	2316	ENSG00000196924	161615	0.411596	0.00010014	FLNA

## Sheet: CAMTA1_ChIP_RNAseq_merged
	seqnames	start	end	width	strand	V5	geneId	ENSEMBL	baseMean	log2 Fold Change	padj	Gene
1	chr1	7740313	7740827	515	*	69	23261	ENSG00000171735	1421.58	0.396604	0.00322264	CAMTA1
2	chr1	17338253	17338505	253	*	72	23400	ENSG00000159363	2347.33	1.05751	9.9015e-29	ATP13A2
3	chr11	66025420	66025979	560	*	155	64837	ENSG00000174996	1774.58	0.702457	1.352e-08	KLC2
4	chr11	118023704	118024144	441	*	21	6330	ENSG00000177098	2747.62	0.949728	0.00016903	SCN4B
5	chr12	6579427	6579824	398	*	152	6843	ENSG00000139190	983.997	0.405147	0.0246059	VAMP1
6	chr14	74180690	74181113	424	*	63	9240	ENSG00000176903	2633.57	0.241486	0.0111706	PNMA1
7	chr14	90848967	90850029	1063	*	2104	801	ENSG00000198668	7582.07	0.42242	7.7692e-07	CALM1
8	chr14	93650620	93651214	595	*	390	64112	ENSG00000165943	1235.4	0.562395	2.61703e-09	MOAP1
9	chr14	94547159	94547611	453	*	72	57062	ENSG00000089737	7689.58	0.411186	0.000229765	DDX24
10	chr14	102438663	102438987	325	*	734	1778	ENSG00000197102	30557.3	0.826255	1.95863e-19	DYNC1H1
11	chr15	25199719	25200233	515	*	998	6638	ENSG00000128739	5362.88	2.16607	3.31609e-129	SNRPN
12	chr15	43477510	43478110	601	*	354	23582	ENSG00000166946	1210.78	0.958573	6.44307e-29	CCNDBP1
13	chr15	43810677	43810950	274	*	163	4130	ENSG00000166963	1216.1	2.6432	2.7783e-74	MAP1A
14	chr15	68871784	68872166	383	*	370	10391	ENSG00000103647	318.216	1.42216	7.57226e-20	CORO2B
15	chr16	2255245	2256208	964	*	201	64223	ENSG00000167965	2699.89	0.352289	0.025561	MLST8
16	chr16	14723865	14724136	272	*	80	5073	ENSG00000140694	3180.36	0.262764	0.00512066	PARN
17	chr16	29911504	29911843	340	*	108	253982	ENSG00000174939	246.008	1.15982	4.67431e-21	ASPHD1
18	chr16	89984285	89984736	452	*	229	4157	ENSG00000258839	850.794	0.420522	0.00106379	MC1R
19	chr16	89988993	89989671	679	*	145	10381	ENSG00000258947	3262.46	1.11977	4.30374e-14	TUBB3
20	chr17	8534378	8534812	435	*	81	4628	ENSG00000133026	12958.4	0.419229	3.60069e-08	MYH10
21	chr17	11924100	11924347	248	*	20	6416	ENSG00000065559	1534.37	0.385225	0.000636821	MAP2K4
22	chr17	20946725	20947072	348	*	208	23326	ENSG00000124422	19092.3	0.303703	0.00125634	USP22
23	chr17	40834596	40835299	704	*	354	8506	ENSG00000108797	3759.39	1.13179	1.7538e-27	CNTNAP1
24	chr2	44588278	44589158	881	*	630	79823	ENSG00000143919	213.863	0.45192	0.0445854	CAMKMT
25	chr2	219827819	219828174	356	*	101	8941	ENSG00000171450	57.6406	0.998954	0.0480418	CDK5R2
26	chr20	23342130	23342711	582	*	302	64412	ENSG00000125812	2171.95	0.475477	0.00038002	GZF1
27	chr20	57581374	57581627	254	*	50	1522	ENSG00000101160	14220.5	0.359495	0.0138046	CTSZ
28	chr3	158450219	158450618	400	*	63	5918	ENSG00000118849	136.061	0.974142	0.00968587	RARRES1
29	chr4	85503927	85504225	299	*	81	1040	ENSG00000163624	52.3163	4.02626	1.20228e-23	CDS1
30	chr5	71404225	71405041	817	*	338	4131	ENSG00000131711	20810.4	1.13866	7.9491e-08	MAP1B
31	chr5	95998014	95998608	595	*	60	831	ENSG00000153113	16713	0.277755	2.90764e-05	CAST
32	chr5	149109565	149109830	266	*	54	133522	ENSG00000155846	475.611	0.503947	0.0308959	PPARGC1B
33	chr5	150535279	150535547	269	*	109	309	ENSG00000197043	16028.1	0.80715	2.11889e-06	ANXA6
34	chr7	4681569	4681855	287	*	86	221937	ENSG00000164916	3559.33	0.28383	0.0140216	FOXK1
35	chr7	100812238	100812524	287	*	34	7425	ENSG00000128564	785.821	2.74005	1.047e-45	VGF
36	chr9	129677046	129677295	250	*	94	9649	ENSG00000136828	346.672	0.99276	0.000193	RALGPS1
37	chr9	131314330	131314659	330	*	234	6709	ENSG00000197694	27548.3	0.762043	3.92741e-25	SPTAN1
38	chrX	75647964	75648287	324	*	111	57692	ENSG00000198934	540.123	2.67441	7.94845e-45	MAGEE1
39	chrX	148586639	148586884	246	*	30	3423	ENSG00000010404	4286.44	0.87058	4.12428e-21	IDS
