# Supplementary material for: TAZ-CAMTA1 and YAP-TFE3 alter the TAZ/YAP transcriptome by recruiting the ATAC histone acetyltransferase complex
Source: eLife. 2021 Apr 29;10:e62857. doi: 10.7554/eLife.62857 (PMC8143797; doi:10.7554/eLife.62857)
Supplement: Figure 7—source data 1. [file elife-62857-fig7-data1.xlsx]

## Sheet: Sheet1
short hairpin number	Gene name	Gene description	Clone ID	Oligo Sequence	RefSeq ID
sh#1	YEATS2	YEATS domain containing 2	TRCN0000144252	CCGGCGTCAGAGTTCAAGTTCATTTCTCGAGAAATGAACTTGAACTCTGACGTTTTTTG	NM_018023
sh#2	YEATS2	YEATS domain containing 2	TRCN0000144134	CCGGCCTAACTACAAACAGCAAGAACTCGAGTTCTTGCTGTTTGTAGTTAGGTTTTTTG	NM_018023
sh#3	YEATS2	YEATS domain containing 2	TRCN0000144016	CCGGCCAGTCAGAAATCTGTTCTATCTCGAGATAGAACAGATTTCTGACTGGTTTTTTG	NM_018023
sh#4	YEATS2	YEATS domain containing 2	TRCN0000140296	CCGGGCGAGCTACGAACAATGCTAACTCGAGTTAGCATTGTTCGTAGCTCGCTTTTTTG	NM_018023
sh#5	YEATS2	YEATS domain containing 2	TRCN0000431997	CCGGATAACAGCAATATGGATATAGCTCGAGCTATATCCATATTGCTGTTATTTTTTTG	NM_018023
sh#1	ZZZ3	zinc finger, ZZ-type containing 3	TRCN0000376579	CCGGTCAAAGAACTTGGTCATAAATCTCGAGATTTATGACCAAGTTCTTTGATTTTTG	NM_015534
sh#2	ZZZ3	zinc finger, ZZ-type containing 3	TRCN0000370301	CCGGTTCCCGATCTACTCGTGTTACCTCGAGGTAACACGAGTAGATCGGGAATTTTTG	NM_015534
sh#3	ZZZ3	zinc finger, ZZ-type containing 3	TRCN0000135859	CCGGCGCATCCTGAAGAAATCTCTTCTCGAGAAGAGATTTCTTCAGGATGCGTTTTTTG	NM_015534
sh#4	ZZZ3	zinc finger, ZZ-type containing 3	TRCN0000133685	CCGGGCATCAGATGACGAAAGTATTCTCGAGAATACTTTCGTCATCTGATGCTTTTTTG	NM_015534
sh#5	ZZZ3	zinc finger, ZZ-type containing 3	TRCN0000370272	CCGGGACGACAGCACCCTCTTAATACTCGAGTATTAAGAGGGTGCTGTCGTCTTTTTG	NM_015534
sh#1	EP400	E1A binding protein p400	TRCN0000370638	CCGGGCCTTATACGAGGACGTTATCCTCGAGGATAACGTCCTCGTATAAGGCTTTTTG	NM_015409
sh#2	EP400	E1A binding protein p400	TRCN0000312678	CCGGTCACAACCTCGGTCAAGTTTACTCGAGTAAACTTGACCGAGGTTGTGATTTTTG	NM_015409
sh#3	EP400	E1A binding protein p400	TRCN0000312679	CCGGGGAGGTCTTCAAGGAGTATTTCTCGAGAAATACTCCTTGAAGACCTCCTTTTTG	NM_015409
sh#4	EP400	E1A binding protein p400	TRCN0000312676	CCGGCAGCCGTACCACAGGTATAAACTCGAGTTTATACCTGTGGTACGGCTGTTTTTG	NM_015409
sh#5	EP400	E1A binding protein p400	TRCN0000050260	CCGGGCGGAAACTCATGGAGGAAATCTCGAGATTTCCTCCATGAGTTTCCGCTTTTTG	NM_015409
sh#1	NCOA2	nuclear receptor coactivator 2	TRCN0000276447	CCGGATCCGTTCTCAGACTACTAATCTCGAGATTAGTAGTCTGAGAACGGATTTTTTG	NM_006540
sh#2	NCOA2	nuclear receptor coactivator 2	TRCN0000019642	CCGGGCACAGGAAATAGCCATAGTTCTCGAGAACTATGGCTATTTCCTGTGCTTTTT	NM_006540
sh#3	NCOA2	nuclear receptor coactivator 2	TRCN0000019639	CCGGGCACTCTTGTTGCTGCACAAACTCGAGTTTGTGCAGCAACAAGAGTGCTTTTT	NM_006540
sh#4	NCOA2	nuclear receptor coactivator 2	TRCN0000319399	CCGGGCACTCTTGTTGCTGCACAAACTCGAGTTTGTGCAGCAACAAGAGTGCTTTTTG	NM_006540
sh#5	NCOA2	nuclear receptor coactivator 2	TRCN0000019640	CCGGCCAGGAATGATGGGTAATCAACTCGAGTTGATTACCCATCATTCCTGGTTTTT	NM_006540
sh#1	TCF20	transcription factor 20	TRCN0000015490	CCGGCGCTTGATGATATACTGTCTTCTCGAGAAGACAGTATATCATCAAGCGTTTTT	NM_005650
sh#2	TCF20	transcription factor 20	TRCN0000297821	CCGGGCACAGGCTTATGGAACACAACTCGAGTTGTGTTCCATAAGCCTGTGCTTTTTG	NM_005650
sh#3	TCF20	transcription factor 20	TRCN0000280429	CCGGGCTAGTTTCAACAACAAGAAACTCGAGTTTCTTGTTGTTGAAACTAGCTTTTTG	NM_005650
sh#4	TCF20	transcription factor 20	TRCN0000280378	CCGGCGCTTGATGATATACTGTCTTCTCGAGAAGACAGTATATCATCAAGCGTTTTTG	NM_005650
sh#5	TCF20	transcription factor 20	TRCN0000015492	CCGGGCACAGGCTTATGGAACACAACTCGAGTTGTGTTCCATAAGCCTGTGCTTTTT	NM_005650
sh#1	NCOR2	nuclear receptor co-repressor 2	TRCN0000060707	CCGGGCAGTGTAAGAACTTCTACTTCTCGAGAAGTAGAAGTTCTTACACTGCTTTTTG	NM_006312
sh#2	NCOR2	nuclear receptor co-repressor 2	TRCN0000060704	CCGGCCTCTATTACTACCTGACTAACTCGAGTTAGTCAGGTAGTAATAGAGGTTTTTG	NM_006312
sh#3	NCOR2	nuclear receptor co-repressor 2	TRCN0000060703	CCGGGCCTGTCTAAAGCCTTAACTACTCGAGTAGTTAAGGCTTTAGACAGGCTTTTTG	NM_006312
sh#4	NCOR2	nuclear receptor co-repressor 2	TRCN0000060705	CCGGGCTTCACAACACAGGCATGAACTCGAGTTCATGCCTGTGTTGTGAAGCTTTTTG	NM_006312
sh#5	NCOR2	nuclear receptor co-repressor 2	TRCN0000060706	CCGGGCAGCGCATCAAGTTCATCAACTCGAGTTGATGAACTTGATGCGCTGCTTTTTG	NM_006312
sh#1	EP300	E1A binding protein p300	TRCN0000039885	CCGGGCCTTCACAATTCCGAGACATCTCGAGATGTCTCGGAATTGTGAAGGCTTTTTG	NM_001429
sh#2	EP300	E1A binding protein p300	TRCN0000039886	CCGGCCCGGTGAACTCTCCTATAATCTCGAGATTATAGGAGAGTTCACCGGGTTTTTG	NM_001429
sh#3	EP300	E1A binding protein p300	TRCN0000039883	CCGGCCTCACTTTATGGAAGAGTTACTCGAGTAACTCTTCCATAAAGTGAGGTTTTTG	NM_001429
sh#4	EP300	E1A binding protein p300	TRCN0000231133	CCGGTAACCAATGGTGGTGATATTACTCGAGTAATATCACCACCATTGGTTATTTTTG	NM_001429
sh#5	EP300	E1A binding protein p300	TRCN0000231134	CCGGATACTCAGCCGGAGGATATTTCTCGAGAAATATCCTCCGGCTGAGTATTTTTTG	NM_001429
sh#1	CSRP2BP (KAT14)	CSRP2 binding protein (KAT14)	TRCN0000107700	CCGGCGGCCATTGATGTGTTGTCATCTCGAGATGACAACACATCAATGGCCGTTTTTG	NM_020536
sh#2	CSRP2BP (KAT14)	CSRP2 binding protein (KAT14)	TRCN0000107701	CCGGGCTGTCCTACTTCTGTGACAACTCGAGTTGTCACAGAAGTAGGACAGCTTTTTG	NM_020536
sh#3	CSRP2BP (KAT14)	CSRP2 binding protein (KAT14)	TRCN0000107702	CCGGCCCTTATACCTCTCGGATCTTCTCGAGAAGATCCGAGAGGTATAAGGGTTTTTG	NM_020536
sh#4	CSRP2BP (KAT14)	CSRP2 binding protein (KAT14)	TRCN0000107703	CCGGCAAGGTTATTTCAGGTGGAAACTCGAGTTTCCACCTGAAATAACCTTGTTTTTG	NM_020536
sh#5	CSRP2BP (KAT14)	CSRP2 binding protein (KAT14)	TRCN0000107704	CCGGGCACCTCTCGATTACTGTTATCTCGAGATAACAGTAATCGAGAGGTGCTTTTTG	NM_020536
sh#1	NFRKB	nuclear factor related to kappaB binding protein	TRCN0000014868	CCGGCAGGGAGGTTGCATCATTGTTCTCGAGAACAATGATGCAACCTCCCTGTTTTT	NM_006165
sh#2	NFRKB	nuclear factor related to kappaB binding protein	TRCN0000014870	CCGGCCCTGTGTGAAATACGACATTCTCGAGAATGTCGTATTTCACACAGGGTTTTT	NM_006165
sh#3	NFRKB	nuclear factor related to kappaB binding protein	TRCN0000232106	CCGGTCACCAGCACTCAGGTAAATACTCGAGTATTTACCTGAGTGCTGGTGATTTTTG	NM_006165
sh#4	NFRKB	nuclear factor related to kappaB binding protein	TRCN0000014872	CCGGGCCACGTTGGATTTACAAGAACTCGAGTTCTTGTAAATCCAACGTGGCTTTTT	NM_006165
sh#5	NFRKB	nuclear factor related to kappaB binding protein	TRCN0000232107	CCGGAGAGGATGGCTTCCGTGAAAGCTCGAGCTTTCACGGAAGCCATCCTCTTTTTTG	NM_006165
sh#1	TRIM24	tripartite motif-containing 24	TRCN0000021260	CCGGCCATGAAATGAGCCTGGCTTTCTCGAGAAAGCCAGGCTCATTTCATGGTTTTT	NM_003852
sh#2	TRIM24	tripartite motif-containing 24	TRCN0000021259	CCGGCGCATGAAACTTATGCAACAACTCGAGTTGTTGCATAAGTTTCATGCGTTTTT	NM_003852
sh#3	TRIM24	tripartite motif-containing 24	TRCN0000021262	CCGGGCAGCAGTACAGCATTACTTTCTCGAGAAAGTAATGCTGTACTGCTGCTTTTT	NM_003852
sh#4	TRIM24	tripartite motif-containing 24	TRCN0000195174	CCGGCCTTGTTAAGTTAACACCTATCTCGAGATAGGTGTTAACTTAACAAGGTTTTTTG	NM_003852
sh#5	TRIM24	tripartite motif-containing 24	TRCN0000194983	CCGGCCATTTCTGTTAACCTCTTATCTCGAGATAAGAGGTTAACAGAAATGGTTTTTTG	NM_003852
sh#1	CREBBP	CREB binding protein	TRCN0000006485	CCGGCCCGATAACTTTGTGATGTTTCTCGAGAAACATCACAAAGTTATCGGGTTTTT	NM_004380
sh#2	CREBBP	CREB binding protein	TRCN0000006486	CCGGGCTATCAGAATAGGTATCATTCTCGAGAATGATACCTATTCTGATAGCTTTTT	NM_004380
sh#3	CREBBP	CREB binding protein	TRCN0000006488	CCGGCCGTTTACCATGAGATCCTTACTCGAGTAAGGATCTCATGGTAAACGGTTTTT	NM_004380
sh#4	CREBBP	CREB binding protein	TRCN0000011027	CCGGCGTGCCAAATATGTCTCAGATCTCGAGATCTGAGACATATTTGGCACGTTTTT	NM_004380
sh#5	CREBBP	CREB binding protein	TRCN0000367481	CCGGTAACTCTGGCCATAGCTTAATCTCGAGATTAAGCTATGGCCAGAGTTATTTTTG	NM_004380
sh#1	NCOA6	nuclear receptor coactivator 6	TRCN0000063263	CCGGGCAGATTATGACCAATCAAATCTCGAGATTTGATTGGTCATAATCTGCTTTTTG	NM_014071
sh#2	NCOA6	nuclear receptor coactivator 6	TRCN0000063264	CCGGCCCTAAACTTACCTCACAGTACTCGAGTACTGTGAGGTAAGTTTAGGGTTTTTG	NM_014071
sh#3	NCOA6	nuclear receptor coactivator 6	TRCN0000303657	CCGGACAAATGAACCCAGCTAATTTCTCGAGAAATTAGCTGGGTTCATTTGTTTTTTG	NM_014071
sh#4	NCOA6	nuclear receptor coactivator 6	TRCN0000303658	CCGGGCCCATTGTTGGTCAACTTATCTCGAGATAAGTTGACCAACAATGGGCTTTTTG	NM_014071
sh#5	NCOA6	nuclear receptor coactivator 6	TRCN0000299538	CCGGGCAGATTATGACCAATCAAATCTCGAGATTTGATTGGTCATAATCTGCTTTTTG	NM_014071
sh#1	EPC2	enhancer of polycomb homolog 2	TRCN0000062734	CCGGGCCAGTATTATGCTCCTCGTTCTCGAGAACGAGGAGCATAATACTGGCTTTTTG	NM_015630
sh#2	EPC2	enhancer of polycomb homolog 2	TRCN0000062735	CCGGCGAGAATTTAGTAGAGCCATACTCGAGTATGGCTCTACTAAATTCTCGTTTTTG	NM_015630
sh#3	EPC2	enhancer of polycomb homolog 2	TRCN0000062737	CCGGCCACACCACTACAAACCACTTCTCGAGAAGTGGTTTGTAGTGGTGTGGTTTTTG	NM_015630
sh#4	EPC2	enhancer of polycomb homolog 2	TRCN0000062736	CCGGGCAGAGAGCAACGTCAACTATCTCGAGATAGTTGACGTTGCTCTCTGCTTTTTG	NM_015630
sh#5	EPC2	enhancer of polycomb homolog 2	TRCN0000363358	CCGGGACATTGCCTGTGATCAATAACTCGAGTTATTGATCACAGGCAATGTCTTTTTG	NM_015630
sh#1	IRF2BP2	interferon regulatory factor 2 binding protein 2	TRCN0000364917	CCGGGGCCCTTCGAGAGCAAGTTTACTCGAGTAAACTTGCTCTCGAAGGGCCTTTTTG	NM_182972
sh#2	IRF2BP2	interferon regulatory factor 2 binding protein 2	TRCN0000364916	CCGGAGCTAGTGGAGAGGTCTATTGCTCGAGCAATAGACCTCTCCACTAGCTTTTTTG	NM_182972
sh#3	IRF2BP2	interferon regulatory factor 2 binding protein 2	TRCN0000364854	CCGGCCCAATGATTACCCTTAATTACTCGAGTAATTAAGGGTAATCATTGGGTTTTTG	NM_182972
sh#4	IRF2BP2	interferon regulatory factor 2 binding protein 2	TRCN0000034174	CCGGCCTGATCTTAGTAGCAGACAACTCGAGTTGTCTGCTACTAAGATCAGGTTTTTG	NM_182972
sh#5	IRF2BP2	interferon regulatory factor 2 binding protein 2	TRCN0000364851	CCGGTGATCTTAGTAGCAGACAATGCTCGAGCATTGTCTGCTACTAAGATCATTTTTG	NM_182972
sh#1	NCOR1	nuclear receptor co-repressor 1	TRCN0000060656	CCGGGCCATCAAACACAATGTCAAACTCGAGTTTGACATTGTGTTTGATGGCTTTTTG	NM_006311
sh#2	NCOR1	nuclear receptor co-repressor 1	TRCN0000299678	CCGGGCCCACAGATGATGAAGAAATCTCGAGATTTCTTCATCATCTGTGGGCTTTTTG	NM_006311
sh#3	NCOR1	nuclear receptor co-repressor 1	TRCN0000299677	CCGGGCTCTCAAAGTTCAGACTCTTCTCGAGAAGAGTCTGAACTTTGAGAGCTTTTTG	NM_006311
sh#4	NCOR1	nuclear receptor co-repressor 1	TRCN0000303750	CCGGCTATCAGCCAGAGGTTGTTAACTCGAGTTAACAACCTCTGGCTGATAGTTTTTG	NM_006311
sh#5	NCOR1	nuclear receptor co-repressor 1	TRCN0000310464	CCGGGCCATCAAACACAATGTCAAACTCGAGTTTGACATTGTGTTTGATGGCTTTTTG	NM_006311
sh#1	MLL2 (KMT2D)	myeloid/lymphoid or mixed-lineage leukemia 2	TRCN0000013138	CCGGCCCACCTGAATCATCACCTTTCTCGAGAAAGGTGATGATTCAGGTGGGTTTTT	NM_003482
sh#2	MLL2 (KMT2D)	myeloid/lymphoid or mixed-lineage leukemia 2	TRCN0000013140	CCGGCCTCGCCTCAAGAAATGGAAACTCGAGTTTCCATTTCTTGAGGCGAGGTTTTT	NM_003482
sh#3	MLL2 (KMT2D)	myeloid/lymphoid or mixed-lineage leukemia 2	TRCN0000013139	CCGGCCTGAATTGAACAACAGTCTTCTCGAGAAGACTGTTGTTCAATTCAGGTTTTT	NM_003482
sh#4	MLL2 (KMT2D)	myeloid/lymphoid or mixed-lineage leukemia 2	TRCN0000013141	CCGGCGCTTTGAGTTGCCATTTGATCTCGAGATCAAATGGCAACTCAAAGCGTTTTT	NM_003482
sh#5	MLL2 (KMT2D)	myeloid/lymphoid or mixed-lineage leukemia 2	TRCN0000235741	CCGGCTGTTGTATAGTTGGACTATGCTCGAGCATAGTCCAACTATACAACAGTTTTTG	NM_003482
sh#1	EPC1	enhancer of polycomb homolog 1	TRCN0000073264	CCGGCCAGTCTTCAATGCTAAAGATCTCGAGATCTTTAGCATTGAAGACTGGTTTTTG	NM_025209
sh#2	EPC1	enhancer of polycomb homolog 1	TRCN0000073265	CCGGGCTTTGTTACAGCCTTCAAATCTCGAGATTTGAAGGCTGTAACAAAGCTTTTTG	NM_025209
sh#3	EPC1	enhancer of polycomb homolog 1	TRCN0000073266	CCGGGCTCATTCACATACAGCCTTTCTCGAGAAAGGCTGTATGTGAATGAGCTTTTTG	NM_025209
sh#4	EPC1	enhancer of polycomb homolog 1	TRCN0000073263	CCGGGCCGAACAATACCAGCAACATCTCGAGATGTTGCTGGTATTGTTCGGCTTTTTG	NM_025209
sh#5	EPC1	enhancer of polycomb homolog 1	TRCN0000229403	CCGGATCCGACCGAAACGGAAATATCTCGAGATATTTCCGTTTCGGTCGGATTTTTTG	NM_025209
sh#1	C11orf30 (EMSY)	chromosome 11 open reading frame 30	TRCN0000230140	CCGGCTACGAGTGGTAGCATCATTACTCGAGTAATGATGCTACCACTCGTAGTTTTTG	NM_020193
sh#2	C11orf30 (EMSY)	chromosome 11 open reading frame 30	TRCN0000230141	CCGGAGACTAGCCCTACCATAATTTCTCGAGAAATTATGGTAGGGCTAGTCTTTTTTG	NM_020193
sh#3	C11orf30 (EMSY)	chromosome 11 open reading frame 30	TRCN0000218503	GTACCGGCGTACTCCTTCTGACAAATTTCTCGAGAAATTTGTCAGAAGGAGTACGTTTTTTG	NM_020193
sh#4	C11orf30 (EMSY)	chromosome 11 open reading frame 30	TRCN0000218618	GTACCGGTAATATGTCTGGACCTAATAGCTCGAGCTATTAGGTCCAGACATATTATTTTTTG	NM_020193
sh#5	C11orf30 (EMSY)	chromosome 11 open reading frame 30	TRCN0000230142	CCGGCATTATGCAGCAGGCATTAAGCTCGAGCTTAATGCCTGCTGCATAATGTTTTTG	NM_020193
