# Supplementary material for: TAZ-CAMTA1 and YAP-TFE3 alter the TAZ/YAP transcriptome by recruiting the ATAC histone acetyltransferase complex
Source: eLife. 2021 Apr 29;10:e62857. doi: 10.7554/eLife.62857 (PMC8143797; doi:10.7554/eLife.62857)
Supplement: Figure 8—source data 1. [file elife-62857-fig8-data1.xlsx]

## Sheet: DEG_TC_shYEATS2_VS_shNT_pad
ext_gene	baseMean	log2FoldChange	padj
LPAR6	53.1327	-2.89398	0.000637782
LINC02582	60.1454	-2.54343	2.84674e-06
FAP	66.4373	-2.15559	0.0421839
HYPK	97.8971	-1.94387	0.0415503
PRND	77.229	-1.90325	0.000614552
TRBV20-1	76.7965	-1.86947	0.00213319
NA	87.8514	-1.824	0.000215816
PYGM	82.1899	-1.76939	0.000221839
PI15	131.332	-1.76771	0.0464835
BMPER	71.4094	-1.75913	0.0462891
MXRA8	87.4438	-1.5936	0.0059457
SLC14A1	1291.59	-1.58624	0.000202145
FNDC1	281.067	-1.57809	0.00346949
HSPB6	532.375	-1.53299	0.00555865
YEATS2	2554.72	-1.38851	9.24204e-14
GZMM	716.414	-1.33319	0.0297761
CD4	222.713	-1.2285	0.0059457
COL1A2	1143.95	-1.17031	1.09504e-06
PLD1	666.9	-1.11355	0.0474026
GLIPR1	542.462	-1.09721	4.59929e-05
ALX1	168.066	-1.09252	0.03761
SPANXB1	489.705	-1.04817	0.000202145
PEG10	38978.6	-1.03828	0.00940612
MATN2	2664.56	-0.962048	2.34636e-06
HR	217.914	-0.893565	0.0445899
NFATC2	478.575	-0.830548	0.0408735
SEL1L3	3372.65	0.606616	0.0221454
NEO1	8132.46	0.636777	0.0142915
LYN	569.353	0.650763	0.0415503
SDK1	1765.96	0.696703	0.012272
DPYSL3	1622.81	0.697522	0.0327653
SH3RF3	778.406	0.718994	0.0297761
GPC4	1336.9	0.777493	0.00211356
RALGAPA2	4114.45	0.802383	0.00216884
SLC2A3	2525.29	0.806379	0.00681988
ADAM23	1347.3	0.824966	0.00337092
LRIG1	1075.3	0.8693	0.000162664
SLC7A1	2848.22	0.888251	0.0126856
IL17RD	1195.77	0.911658	0.00667021
PCYT1B	256.206	0.913398	0.042131
SMOX	1750.33	0.932112	0.0016363
GNAL	375.111	0.960936	0.0461969
SOX4	2498.69	0.963713	0.0227634
LINC02762	200.052	0.96443	0.0408735
FJX1	514.847	0.987538	0.0167069
COL14A1	338.733	0.998422	0.0464269
TSPAN13	293.13	1.0033	0.0461969
GCNT2	267.183	1.0088	0.00296512
MTHFD2	5589.11	1.01542	0.00399096
PDGFA	1035.43	1.02433	0.0421839
BMP6	166.301	1.05815	0.0408735
L3MBTL4	134.274	1.07859	0.0341316
PPFIBP2	362.375	1.08063	0.028235
SLC3A2	5929.53	1.08426	0.0016363
CTH	535.5	1.09689	0.0464269
SDC2	2033.51	1.13436	1.80223e-05
AP006333.1	126.9	1.13815	0.0397486
SERPINE1	662.737	1.18587	0.000183422
NPAS3	318.885	1.20584	0.00352871
TRIB3	6385.91	1.21854	0.0401736
ATF3	272.449	1.22847	0.00633483
CEACAM1	1356.56	1.24755	0.00182286
RIMS4	343.255	1.26093	0.00450179
NRCAM	106.766	1.26269	0.027421
SLC7A5	11310.8	1.28162	0.00465014
MYO5B	188.339	1.31168	0.0202131
RNF150	413.765	1.33919	0.0082456
TRPA1	699.229	1.38108	0.0216839
STC2	3185.23	1.4044	0.0293625
LUCAT1	249.967	1.44457	3.30241e-06
FRMD4B	134.936	1.47784	0.00827989
DDIT3	1280.59	1.49706	0.000767527
NECAB2	68.2199	1.50406	0.012196
AKR1C3	537.492	1.50947	0.0126856
TCL6	409.236	1.52604	0.0149536
LYPD6B	456.485	1.55621	0.0415503
ZNF469	270.47	1.56275	0.00211356
FAM110B	845.936	1.57733	0.0151756
LBH	692.223	1.57735	1.36906e-05
SH3GL2	150.135	1.58128	0.00337887
ADM2	699.858	1.60319	0.0334886
OSGIN1	1249.17	1.61335	0.00622032
EPHA4	299.197	1.6152	7.64034e-06
H2BC11	83.2064	1.61737	0.0272838
NTN1	60.2539	1.62082	0.0474026
ADRA1B	187.31	1.63408	0.000183422
EFR3B	61.1685	1.65918	0.00827989
AC104051.2	171.205	1.73653	6.20484e-07
CXCL12	538.313	1.74614	1.86782e-09
AKR1C2	140.839	1.74714	0.00026699
CLSTN2	352.283	1.74943	0.000350047
MARK1	94.6144	1.75219	0.00216884
FRAS1	779.893	1.80963	0.00370404
CHAC1	565.993	1.81592	0.0102185
NPY	155.272	1.87954	0.0140865
PPM1H	165.263	1.88475	4.2941e-05
MEGF6	167.785	1.95113	0.0341316
NMRAL2P	127.784	2.03241	3.4297e-05
KLHDC7A	45.1184	2.17382	0.0478376
EGFLAM	171.031	2.24046	3.92328e-06
RIMKLA	103.961	2.24247	0.0462891
SDK2	51.1493	2.30349	0.024563
SAMD5	253.303	2.3383	4.47899e-09
ANKRD18A	84.0239	2.35877	0.0059457
NTRK3	170.448	2.39248	9.5704e-06
MEGF11	26.044	2.403	0.042131
RSAD2	68.2329	2.64988	0.0415503
ABCB1	25.78	2.65695	0.0426355
MGAT4A	71.1615	2.68469	0.000755388
AKR1B10	986.137	2.69217	0.000100824
PCDH19	53.9813	2.69453	0.0111999
EDN3	67.8446	2.9445	5.43833e-08
DMBT1	291.829	3.08499	0.000755388
SLPI	175.301	3.0974	1.09504e-06
MYH8	692.77	3.4415	0.000221839
PARD3B	136.963	3.53733	3.78504e-06
GRIP1	26.4017	3.63042	0.0082456
GALR1	64.0183	3.70441	1.58261e-08
LSAMP	90.4319	3.84143	0.000193802
LRP2	222.158	4.48438	9.24204e-14
MECOM	30.6374	4.59609	0.0164285
MPPED2	46.8764	5.63877	1.35357e-07
RSPH10B2	37.9548	5.82498	0.00381101
PCSK2	37.1838	5.8264	6.67332e-11
CHGA	625.437	5.89541	4.20046e-08
DACH1	14.3242	7.18007	0.00450179

## Sheet: DEG_TC_shZZZ3_VS_shNT_pad
ext_gene	baseMean	log2FoldChange	padj
AC011462.1	120.181	-9.00289	0.0103312
CCL14	59.9807	-7.53754	0.000488029
NXF2B	73.086	-7.34326	0.0048487
CELF6	12.1059	-6.7754	0.0449729
AC008870.2	9.69469	-6.59877	0.0355738
GRIN3A	37.6499	-5.97287	0.00154156
RGS7	38.2791	-5.46171	0.0187383
LPAR6	53.1327	-5.06703	1.70146e-08
MALL	172.354	-4.84037	1.45951e-16
CD93	48.7652	-4.53716	0.000889608
NPY6R	10.2935	-4.41226	0.0153077
CA4	24.9401	-4.17933	6.04983e-05
AC073896.1	31.5592	-4.1407	0.0244275
AL499616.1	13.3883	-3.94094	0.0306591
STK32A	25.3994	-3.90596	0.0176601
SAMD11	394.532	-3.85174	1.41142e-26
LMOD2	11.5906	-3.69431	0.0463201
IGF1	37.9092	-3.6474	0.000465398
RGS5	2365.59	-3.63429	5.15915e-11
SUCNR1	17.2759	-3.54374	0.0371912
PCSK1	1517.45	-3.37402	4.27906e-26
LINC02593	310.428	-3.32425	3.95125e-29
NPTX1	496.747	-3.18912	7.88446e-09
ADCY5	25.7926	-3.09078	8.52464e-05
TDO2	60.0922	-3.05184	9.41244e-07
TYRP1	91.9342	-2.91441	1.14441e-05
SPNS2	25.3948	-2.89662	0.0160762
KIAA1210	145.403	-2.86851	0.0113343
CLEC3B	181.747	-2.84691	8.34689e-10
AL078590.2	46.5043	-2.79441	0.0479163
COL3A1	827.862	-2.68425	6.61212e-14
HMCN1	1239.46	-2.68111	0.00931923
PCDHB14	49.3372	-2.67871	0.000198154
FAT3	203.694	-2.6677	0.000846409
MKX	174.256	-2.62553	0.0123855
SCTR	53.0559	-2.5475	0.000238213
PCDHB12	21.1689	-2.50767	0.0270339
PTGDS	193.603	-2.48862	4.84942e-11
COLEC10	117.972	-2.4683	0.00610719
PALMD	34.7523	-2.45093	0.000828269
LINC02691	25.387	-2.44367	0.0293337
SLC8A1	157.862	-2.38827	6.13561e-06
SLC24A3	39.6135	-2.37278	0.000721071
OR2C3	21.5168	-2.36088	0.0242394
ADAMTSL1	94.6441	-2.35873	8.34689e-10
EVX1	31.4523	-2.35636	0.00621542
CLEC18B	23.9795	-2.35389	0.0248765
NR0B1	294.25	-2.34804	8.34689e-10
C7	289.668	-2.33214	0.00206668
MFAP2	349.562	-2.29396	0.00984614
PCDHB8	24.1239	-2.26389	0.0279914
ARMC4	144.662	-2.244	0.0420088
SPP1	4337.69	-2.21791	3.7402e-16
SCUBE2	122.824	-2.21181	1.36676e-09
AL645608.2	48.1954	-2.20052	0.00105735
NA	97.2464	-2.18637	6.11594e-05
ELOVL3	38.9987	-2.15312	0.00620136
CACNA1H	41.5383	-2.14882	0.0456954
AK5	208.438	-2.12413	8.31006e-10
PCDHB13	97.5921	-2.09179	2.25945e-06
H4C15	389.223	-2.04815	0.00136552
AL669942.1	50.9536	-2.04213	0.00503595
LPAR1	374.767	-2.00431	0.00320497
PYGM	82.1899	-1.99943	6.24391e-06
LMNTD2-AS1	299.591	-1.96026	0.003235
PKD1P5	124.569	-1.95128	0.0156266
BMX	131.773	-1.928	5.84598e-05
RNF112	80.3873	-1.889	0.0160762
EDNRA	222.525	-1.88659	0.0233859
PRUNE2	42.3583	-1.88146	0.0270339
COL2A1	668.32	-1.88025	0.0181056
CYP4F12	77.4902	-1.87689	0.0096507
AC140479.2	81.8124	-1.86736	0.0107749
NA	39.8186	-1.86252	0.0466268
ST8SIA5	81.3203	-1.85967	0.0138778
MMP9	195.075	-1.85871	0.00483044
SPRN	189.766	-1.84267	9.6335e-06
ID2	813.717	-1.84125	3.50729e-15
PEG10	38978.6	-1.84061	1.79159e-10
IGDCC3	71.6141	-1.7862	0.0099035
EXTL1	35.973	-1.77505	0.0319505
CP	163.642	-1.75575	0.0396577
RUNDC3A	99.7608	-1.75573	0.000131754
PCDHB15	68.3419	-1.73371	0.01711
CHRNE	50.4236	-1.72574	0.0257037
GPER1	124.26	-1.72242	0.0100821
APLNR	97.3415	-1.71245	0.0435927
DAPL1	113.088	-1.71158	0.0427422
PTHLH	142.302	-1.71153	9.98792e-05
AL096711.2	96.3083	-1.71043	0.0191414
SEMA3C	2207.19	-1.7085	0.0314149
MAOB	428.484	-1.70756	0.0129441
TSPOAP1	267.886	-1.69393	2.02855e-05
PDE1C	763.789	-1.69186	1.59332e-05
MAGEB3	88.1001	-1.66757	0.0144352
SHC4	188.253	-1.66133	0.00212558
PID1	263.828	-1.64199	0.00033283
TNFRSF11B	3560.79	-1.63886	0.000228667
SPARCL1	742.399	-1.63488	6.02331e-06
COL8A1	1600.33	-1.62957	0.0017683
SELL	56.512	-1.62419	0.0386247
FHAD1-AS1	41.7847	-1.6241	0.00892342
ZNF471	185.11	-1.60011	0.0458432
KCNC1	100.853	-1.58515	0.00136552
SPON1	68.8087	-1.58152	0.00380657
RGS4	639.07	-1.56198	4.82252e-08
H2AC13	39.0467	-1.55779	0.0363373
CTSO	474.357	-1.54494	2.20985e-06
JPH4	994.158	-1.54163	0.0178551
FBXL7	121.869	-1.53612	0.00299006
COL5A2	841.911	-1.50748	0.0308128
CORO2B	209.018	-1.50313	2.67825e-06
PLAT	16916	-1.49396	3.09578e-06
TENM2	450.308	-1.48226	0.0453872
IGLON5	605.638	-1.47876	0.000131754
LINC01106	906.67	-1.47635	3.57006e-07
TEK	374.815	-1.47627	0.000507559
UNC5B	1289.28	-1.47055	7.45265e-10
TLE2	1438.03	-1.46853	0.000106919
ALDH1L1	429.926	-1.44658	0.00127681
SCN4B	3269.24	-1.44531	4.7594e-08
CARMIL3	61.5673	-1.44344	0.00631788
SELP	160.703	-1.44269	0.0359851
KCNN1	152.515	-1.44129	0.026618
PRAP1	179.571	-1.42658	0.00536407
PPP1R1B	121.527	-1.42522	0.0253544
FAM133A	215.627	-1.41801	0.0401368
CTSK	82.3849	-1.40378	0.0288698
RBMS3	390.718	-1.4005	0.00383675
SLC38A4	660.082	-1.39242	0.0407435
KIRREL2	71.5585	-1.38012	0.0250105
HR	217.914	-1.37975	6.34141e-06
VCAM1	2174.62	-1.37873	3.28541e-06
ADGRG6	1481.41	-1.37149	0.00459634
PCLO	297.973	-1.37107	0.0105595
DKK1	361.97	-1.36369	0.00564919
MMP25	80.5914	-1.35783	0.0365015
AC245060.6	116.494	-1.3481	0.0330654
ZSCAN31	211.932	-1.33889	0.0141671
GCOM1	63.7326	-1.33768	0.032754
UGT8	170.442	-1.33497	0.000824494
NA	359.054	-1.3167	0.0270339
FN1	176837	-1.30538	8.50107e-05
NA	304.066	-1.28789	0.0361694
FMN2	166.702	-1.28653	0.0384998
LTBP1	2655.94	-1.28593	0.0317747
SHC2	989.203	-1.2843	4.00208e-05
TMEM37	644.702	-1.28179	0.0132106
NA	2777.45	-1.26475	0.000712029
CMAHP	79.6009	-1.25476	0.03913
ACE	174.923	-1.24971	0.0106091
LINC01123	878.003	-1.23429	5.3192e-12
IDO1	275.659	-1.22118	0.000322627
GZMM	716.414	-1.21682	0.0244275
C1orf115	696.103	-1.21523	2.10593e-08
PTGER4	208.753	-1.21346	0.00482265
COL9A3	3647.6	-1.20443	0.000944902
COL15A1	16691.5	-1.19665	0.000524781
RGS11	219.396	-1.18005	0.00356177
C3orf80	167.452	-1.1797	0.0307057
CDH15	157.345	-1.17898	0.0156266
MGP	2852.34	-1.17632	0.00148423
UBE2QL1	295.88	-1.1722	0.00448498
ARHGAP18	1050.41	-1.17064	0.00957956
HOXA13	243.339	-1.16658	0.0010109
LINC02202	114.613	-1.1607	0.017007
SNED1	3264.84	-1.1566	2.15963e-05
SPANXB1	489.705	-1.1313	1.06235e-05
FBN1	2240.45	-1.12869	0.0119877
PDE8B	867.385	-1.12433	2.32976e-05
SPRY1	340.879	-1.12399	0.00594333
PDE11A	2272.42	-1.11786	7.61628e-05
EFEMP1	409.341	-1.11668	0.01457
TNFAIP3	390.196	-1.11396	0.00136552
ABAT	236.976	-1.1057	0.00694694
CITED2	1429.48	-1.10562	0.000737843
TPD52L1	1644.91	-1.09943	1.78452e-05
IPO5P1	313.091	-1.095	0.0017683
SNCAIP	238.792	-1.09264	0.0320585
SBSPON	271.656	-1.09249	0.0343626
CGNL1	590.8	-1.08172	2.28934e-05
SLC39A8	337.188	-1.08083	0.00459634
PDE9A	420.761	-1.07484	0.0103233
SIM2	239.849	-1.0702	0.000154676
SLC22A17	1063.06	-1.06082	0.0164154
OPRL1	368.735	-1.05776	0.00489017
AL353803.2	214.57	-1.04617	0.0247476
MFAP4	1475.53	-1.04323	0.00482265
RTN4RL1	219.743	-1.03296	0.0136865
OLFML2B	1313.71	-1.03081	0.029714
ABCG4	115.083	-1.02732	0.0264373
H2AC6	2189.83	-1.02583	2.18878e-05
IRX3	705.068	-1.02556	0.0462682
ID3	6242.35	-1.014	0.0293873
DNER	649.909	-1.01367	0.0327379
TPD52	1337.92	-1.00617	0.000154676
MATN2	2664.56	-0.994226	1.61876e-07
SMAD6	803.328	-0.990437	0.0103312
LPAR2	263.899	-0.987297	0.0257037
ZNF467	769.855	-0.985039	0.0277149
SMAD7	373.741	-0.984495	0.0181547
ELL2	1929.74	-0.982249	0.0228505
ST6GAL1	1379.48	-0.981718	0.0157971
NDUFA6-DT	189.293	-0.964602	0.0099035
SMAD9	278.407	-0.964547	0.0252747
NR2F1	3511.9	-0.961115	1.22892e-06
SGK1	3910.02	-0.957962	7.96275e-06
PTPRB	200.873	-0.957804	0.044693
TM7SF2	3200.41	-0.955216	0.0427422
COL11A2	595.075	-0.95417	0.0466268
TNFSF10	741.135	-0.950459	0.0127883
RAB26	449.512	-0.940174	0.00621404
KCNE4	2435.84	-0.934624	6.68202e-06
SELENBP1	3138.84	-0.911907	0.0332564
CILP2	707.444	-0.90848	0.0106091
PLCD4	939.783	-0.906687	0.0373223
ZNF521	2108.27	-0.893097	0.0357697
PLEKHG4B	1038.63	-0.889405	0.0298031
B4GALNT4	1173.24	-0.883125	0.0257037
ENPP2	574.082	-0.869667	0.00789919
H4C8	500.414	-0.860255	0.00770249
MMP15	1485.31	-0.85702	0.017007
SCUBE3	1203.02	-0.833138	0.00139537
H2BC21	611.66	-0.816414	0.0466268
TRO	3525.1	-0.815378	0.0220675
SPOCK1	4128.99	-0.812626	0.000104393
FLT1	554.13	-0.80821	0.0343973
TSPYL2	1360.82	-0.801358	0.0154353
PTGER2	400.048	-0.799199	0.0342881
PNMA3	332.84	-0.797438	0.0191331
MRC2	12613.5	-0.796866	0.0136033
LRATD2	2385.87	-0.789444	0.0264139
CLSTN3	7528.21	-0.783701	0.04046
SULT1A4	470.472	-0.778631	0.0351411
ST6GALNAC2	850.649	-0.77569	0.0240225
POLR2M	3113.88	-0.774886	0.00625518
RTL5	1631.72	-0.773656	0.00510991
NCALD	684.779	-0.764223	0.0277149
PKP2	570.904	-0.75641	0.0157196
LAMB2	7751.92	-0.756397	0.0259345
ADAM12	615.637	-0.754231	0.025895
NR2F2	4569.1	-0.743233	0.00116034
H2AC11	324.671	-0.731651	0.0121094
TGFBR2	6124.07	-0.722191	0.0112862
ZSWIM5	738.71	-0.713075	0.00397319
CCDC80	3000.48	-0.710587	0.0142671
MFSD6	1131.88	-0.699556	0.0143463
METTL7A	716.155	-0.691313	0.0466938
COL8A2	612.305	-0.690336	0.0288698
TSPY26P	1099.42	-0.669665	0.0157971
ARHGEF25	1873.24	-0.668802	0.017007
LTBP4	3420.92	-0.644715	0.0285635
PIR	1734.32	-0.632222	0.0170635
PLEKHG5	1053.33	-0.632033	0.0285635
HOXA5	558.34	-0.619016	0.0466268
NISCH	3192.68	-0.604374	0.00421072
ETV1	1691.98	-0.594971	0.0168239
VIT	857.757	-0.574145	0.0341111
PIK3R3	2528.61	-0.553598	0.0257037
MEX3B	928.013	-0.523072	0.0153077
LDB2	3456.83	-0.517876	0.0250105
OLA1	2036.87	0.420146	0.048924
APLP2	14820.3	0.423034	0.0452312
TSR1	4953.46	0.46069	0.0253755
GMPS	2407.77	0.463639	0.0276755
ATP2A2	8891.56	0.497247	0.0240214
VHL	2326.28	0.508802	0.0455244
RTN4	11287.2	0.511649	0.0319871
TPM4	10462.4	0.527837	0.0129297
CNN3	7446.69	0.539237	0.00956065
USP31	554.184	0.551543	0.0319419
NUP88	1991.96	0.5533	0.0357697
MAPKAPK5	1113.04	0.556627	0.0156266
TRIP13	2045.91	0.564679	0.0460217
SMS	2868.88	0.565898	0.0102729
CENPH	1138.01	0.569819	0.0457488
MCM3	5984.23	0.569881	0.0424117
B4GALT5	5346.39	0.578538	0.0113641
MSANTD3	939.182	0.57937	0.0183424
ETS1	5865.97	0.589454	0.0468517
KPNB1	16026.6	0.590398	0.00268659
RCAN1	2110.64	0.595204	0.03913
MYO19	1932.14	0.595854	0.0396577
TJP2	1585.44	0.598154	0.00929766
LATS2	832.141	0.600637	0.02518
GRB10	3289.82	0.601506	0.0491964
UXS1	1193.34	0.611046	0.0179783
CREG1	2103.45	0.617626	0.0150641
INCENP	1897.37	0.620184	0.00853688
TRIB1	775.57	0.631237	0.0456954
NSD2	3697.84	0.634427	0.00448498
SCD5	621.492	0.652316	0.017007
ETS2	1088.48	0.65279	0.0117551
SPATS2L	2624.85	0.658344	0.00110105
AJUBA	4175.48	0.665901	0.00538958
AMOTL1	4836.09	0.669405	0.00301134
NRG1	2473.91	0.6701	0.00126274
SAMD4A	1369.34	0.67024	0.0348502
RAB17	2417.11	0.673297	0.0308128
SLC43A3	3167.13	0.684317	0.0185229
TAP2	3446.21	0.684959	0.0116916
NES	4268.85	0.692683	0.0201262
STC1	1375.59	0.693768	0.0191331
BTBD11	575.156	0.694338	0.01381
GJA5	764.976	0.695904	0.0102175
HIVEP3	495.374	0.698993	0.0128015
CHAF1A	900.894	0.705957	0.00480611
PMP22	3961.07	0.708561	0.00577497
RRAGD	709.4	0.713506	0.0339111
PAICS	6110.47	0.732952	0.0028775
SUN2	3893.43	0.735301	0.00923908
FHL2	1766.85	0.735865	0.0402003
MGAT5	4676.68	0.742416	8.76516e-05
TYMS	2491.58	0.74278	0.0354197
PERP	1494.86	0.765281	0.00861719
RHPN2	617.469	0.769248	0.0107749
PTPRJ	3431.96	0.770468	0.0257037
CKS1B	1694.49	0.771336	0.0473593
KLF6	2174.16	0.772864	0.00634852
GBP2	517.495	0.777494	0.0187383
CIT	1189.14	0.78074	0.00288165
NGFR	2133.13	0.782568	0.0198052
MTHFD2	5589.11	0.784858	0.02964
MAFK	1209.9	0.798128	0.0154353
TSC22D1	6340.18	0.799287	2.77191e-07
SLC7A1	2848.22	0.8042	0.0137745
WNT5A	849.11	0.807258	0.0390851
ITGA6	5237.59	0.809416	0.029503
TSPAN18	2154.04	0.812566	0.00053086
AC125807.2	586.272	0.813589	0.042727
HSPB8	995.542	0.819963	0.0483437
MIR4435-2HG	924.939	0.823646	0.0386247
DKK3	19833.6	0.829026	0.0428813
NA	1867.96	0.829195	0.00130384
LOXL2	15031.6	0.839776	0.0102224
ESPL1	1514.38	0.859773	0.00569866
SH3BP4	1824.42	0.860382	8.04265e-05
CCN2	1299.1	0.862613	0.0143391
NFE2L3	2331.61	0.872696	0.000496767
FANCD2	1084.28	0.881272	0.0238283
PIM1	592.38	0.884674	0.0116578
AMOTL2	2161.35	0.89221	0.0351202
PCYT1B	256.206	0.89355	0.0173103
TSPAN13	293.13	0.895573	0.0463737
KLHL13	218.043	0.897752	0.0357215
IER5	1178.83	0.902782	0.0306591
FERMT1	442.75	0.921351	0.00211659
AUNIP	195.044	0.922281	0.0139019
EYA2	481.413	0.922606	0.0222983
GNAL	375.111	0.928199	0.021967
ITGA3	17067.8	0.943048	0.00621542
ABTB2	679.644	0.943367	0.00779379
DRD2	124.164	0.944195	0.0456954
CDC42EP3	461.49	0.947644	0.0042882
PVR	3084.66	0.950413	0.00123916
SPECC1	1338.39	0.952453	0.00728097
FJX1	514.847	0.952838	0.00868628
LRIG1	1075.3	0.961401	2.67825e-06
NEDD9	979.245	0.963992	0.0228505
AC005747.1	1584.85	0.965808	0.0378169
TRABD2A	373.771	0.97466	0.00912916
ENPP1	374.629	0.982495	0.0366581
SORD2P	349.474	0.985744	0.0390461
LAMP3	196.895	0.988302	0.0317747
TMEM255A	459.642	0.999919	0.00191586
RUNX2	408.783	1.00617	0.0268341
UHRF1	1392.23	1.00712	0.00376959
TENT5C	139.223	1.00969	0.0452312
MYC	603.716	1.01091	0.0153727
GNG4	414.41	1.01152	0.00209502
CCL2	1636.99	1.01155	0.0162432
ZIC2	260.044	1.02045	0.0411787
ICOSLG	146.936	1.02996	0.0306591
EMP1	1530.92	1.03145	0.000129416
ENDOD1	3093.11	1.04253	1.34612e-06
HMGA1	6487.34	1.04546	0.0104588
VIPR1	227.397	1.04894	0.00657989
BDNF	158.148	1.052	0.0491104
LINC02762	200.052	1.05361	0.00452324
OCLN	347.755	1.05979	0.00053086
ITGB3	1006.78	1.06123	0.00750057
PPFIBP2	362.375	1.06482	0.0106536
PLEKHA6	506.364	1.06707	0.0385067
PKD1L2	564.186	1.06888	5.85056e-05
SERPINE1	662.737	1.07216	0.000416962
AP000446.1	148.949	1.07374	0.0145297
MTFR2	142.427	1.08207	0.0342881
CYB5R2	208.806	1.08436	0.0481358
IL6R	482.429	1.08564	0.0250105
MAFF	385.129	1.10527	0.00218681
SDC2	2033.51	1.11165	8.32084e-06
SH3RF2	151.312	1.11177	0.0223029
ZNF488	190.484	1.12605	0.0466268
SNTB1	354.71	1.14333	0.0220218
CD44	13870.8	1.14349	0.000217305
PDK1	802.072	1.14385	0.000665547
SERPINB8	251.417	1.14633	0.00990007
USP43	130.082	1.14723	0.0307057
FBLN5	715.206	1.14929	0.00768331
BHLHE41	296.843	1.15622	0.00475468
MLPH	1257.39	1.17527	1.71387e-05
ADGRG1	393.601	1.17586	0.00963675
HTR1D	134.57	1.1824	0.0366119
ARL4C	481.376	1.18744	1.45967e-05
SLC7A5	11310.8	1.18926	0.00448498
PLAU	2013.19	1.19074	6.23851e-05
COL6A3	2994.63	1.1922	0.00033283
ADCY1	279.139	1.20038	0.00035637
JUN	933.447	1.23115	6.42484e-06
AC099548.2	99.2402	1.25283	0.015078
SUSD5	256.542	1.25928	0.00126274
PLCH1	85.8744	1.27163	0.03913
ECM1	232.578	1.29722	0.00572661
CDKN1A	464.672	1.30603	0.000246905
DPYSL3	1622.81	1.30827	8.34689e-10
BASP1	1507.84	1.3124	7.61628e-05
ADAMTS15	520.632	1.31483	0.00210266
FENDRR	746.411	1.31581	0.000322627
SRPX2	1205.12	1.3232	0.00155303
CD24	463.451	1.32425	6.31197e-05
NOG	81.3798	1.32434	0.00750057
KIAA1755	441.491	1.32879	0.0268204
NTF3	96.8316	1.33758	0.0112303
S100A16	582.082	1.33866	0.000203175
C3	394.823	1.35698	0.00211547
IGFBPL1	207.758	1.35753	0.00379948
JPH1	119.501	1.35872	0.000756884
NPTX2	376.115	1.36072	3.66787e-05
CSF2RA	645.111	1.37667	1.0199e-06
PHLDA1	5330.79	1.38004	9.30797e-18
GPC4	1336.9	1.38207	4.42542e-13
LEF1	110.946	1.38518	0.00224077
IL32	191.01	1.38985	0.00994446
CREB5	407.914	1.39711	0.0017683
COLEC12	1405.07	1.40358	1.62716e-11
CADM1	324.166	1.41637	4.33623e-05
MARK1	94.6144	1.41878	0.0138778
FOSL1	511.011	1.42375	0.000255755
AC018755.2	73.2106	1.42708	0.0374387
BEND4	201.097	1.42973	0.0491964
MYO5B	188.339	1.43397	0.00190556
ESX1	234.746	1.45134	0.000363752
SEMA5A	981.21	1.47393	0.00047221
CD70	302.494	1.47746	0.0047081
CDCP1	518.889	1.47862	9.41244e-07
GPR1	116.408	1.48141	0.00545057
CLSTN2	352.283	1.48432	0.00218681
TIMP3	22114.8	1.4931	1.28166e-16
DOCK3	196.831	1.49528	1.24617e-05
ANK1	156.467	1.49604	0.0327186
THBS2	2286.28	1.50252	3.19639e-06
BMP2	154.974	1.50286	0.000955134
KHDRBS3	101.278	1.50414	0.0014818
CCN1	2365.13	1.50611	3.47206e-06
EBF3	63.4126	1.53297	0.00789919
PPL	111.605	1.54083	0.00728302
EBI3	102.545	1.56696	0.00898091
CXCL12	538.313	1.56843	3.03103e-08
PRKCB	2720.01	1.57913	0.00792148
CELF2	383.492	1.6214	2.535e-08
LIPG	543.997	1.63221	0.00683266
KCTD12	428.908	1.64511	0.00522177
CACNG4	217.645	1.64968	1.85155e-05
FAM110B	845.936	1.65066	0.00257804
ATF3	272.449	1.65983	2.34456e-06
PIP5K1B	64.5364	1.66058	0.00177379
S100A3	112.809	1.66518	0.0238157
CLU	6302.83	1.67036	5.36107e-06
CD274	73.7078	1.68064	0.00564919
PSG4	55.3758	1.7036	0.0385766
TMEM158	175.543	1.70696	0.00129025
ANKFN1	113.565	1.71763	0.0125189
RNF144B	93.9646	1.72788	3.74054e-05
CPA4	1283.45	1.73381	0.000979039
GDF15	136.255	1.74875	0.0451762
NA	103.279	1.75009	0.0144663
LEPR	220.18	1.75175	0.00501213
TNFRSF12A	1104.55	1.76373	0.000816409
AOX1	39.7298	1.77332	0.0487477
NA	110.783	1.77776	1.14441e-05
AC008514.1	112.253	1.7811	0.000708579
IGSF1	94.8734	1.79403	5.39856e-05
SDK1	1765.96	1.80012	1.88811e-22
HEY2	77.433	1.80327	6.11594e-05
SEMA6A	614.172	1.81862	0.00076161
MARCHF4	147.257	1.82862	0.000975774
RASGRF2	215.559	1.82922	7.70198e-07
COL5A3	391.256	1.8633	1.23555e-05
ERG	315.659	1.88017	0.00217797
IL1B	53.1302	1.88174	0.0147761
C7orf57	34.0317	1.88221	0.0124708
AP1M2	90.4861	1.88722	0.019003
SH3GL3	128.524	1.94124	2.15104e-05
TNFRSF9	124.559	1.95233	6.54981e-05
CHP2	100.612	1.9723	0.0357697
CACNA2D3	192.083	1.97778	2.65638e-10
CNTNAP3	320.914	1.97836	0.000322627
ITIH5	85.4475	2.01116	3.54286e-05
NTN1	60.2539	2.02771	0.000689756
SCARA5	205.087	2.03846	3.16902e-08
ANOS1	149.533	2.03849	0.000814192
S100A2	73.329	2.06385	3.08767e-05
LIPH	113.808	2.08033	1.27949e-06
LRRN4	32.2518	2.08509	0.00703255
SV2B	127.394	2.09878	3.19639e-06
BMP6	166.301	2.11381	4.84942e-11
ANO4	53.6235	2.11769	0.000144982
CEACAMP10	38.1371	2.20749	0.00199228
SLC12A8	106.394	2.21916	9.15868e-09
DYNC1I1	72.4321	2.22588	0.0161907
SLC1A6	103.408	2.22626	1.77212e-07
ARFGEF3	111.386	2.24849	9.93867e-05
GALNT18	121.252	2.26053	3.63171e-10
KRT80	185.226	2.27695	1.65724e-08
PLCL2	63.4555	2.30046	2.40598e-06
MGAT4A	71.1615	2.33312	0.00217797
FAM201A	52.9966	2.34984	0.00130384
UGT3A1	28.0532	2.35825	0.0306591
CALHM6	28.3721	2.36108	0.00390208
LINC02167	30.6877	2.36601	0.00217797
MOB3B	94.7637	2.37826	9.02719e-10
OR2T33	19.7776	2.38527	0.0142822
NA	65.2955	2.41056	0.000275756
CATSPER1	22.2897	2.41292	0.0466268
TM4SF19	26.2734	2.43085	0.00526828
H19	5040.91	2.43444	1.30344e-09
CYP26B1	77.1282	2.45901	1.21425e-07
TP73	16.5529	2.46267	0.0280317
AL136962.1	98.3065	2.48333	2.25945e-06
FLRT2	49.2546	2.48994	0.0319871
AC104051.2	171.205	2.51849	5.51344e-17
SMOC1	147.447	2.53526	0.000154833
CYP19A1	19.7898	2.56714	0.0424899
FAM180A	20.1329	2.58759	0.041556
TP63	371.746	2.58815	9.67911e-18
PCSK2	37.1838	2.60315	0.0358239
VAV3	75.942	2.60945	9.5965e-06
ARHGAP6	86.5378	2.63403	0.00330982
NRXN3	104.714	2.67568	9.58349e-06
GALR1	64.0183	2.69979	8.01735e-05
MOXD1	313.664	2.73801	1.27399e-12
LAMA1	2598.25	2.75451	1.65691e-18
NA	49.0858	2.75695	0.0191331
FNDC1	281.067	2.77866	4.86977e-14
ABCB4	63.9494	2.84626	1.77587e-05
SLCO5A1	38.1917	2.91123	0.0203423
DEFB1	27.4173	2.94375	0.00177379
ABCB1	25.78	2.9552	0.00301134
HS6ST3	40.7218	3.04329	6.00694e-05
RFPL4A	25.9498	3.04814	0.0157583
MME	43.2622	3.07545	0.0257037
GRIN2A	1173.62	3.1477	0.0230455
TRIML1	30.9451	3.14976	0.000322627
CXCL14	658.226	3.15436	1.41142e-26
HHIP	38.3221	3.16279	5.10992e-05
NPY	155.272	3.19759	1.15787e-09
PKHD1	19.4675	3.23521	0.0111501
KRT75	55.4285	3.23739	1.8329e-07
KRT17	18.0991	3.24681	0.00683266
CALB2	407.135	3.28931	0.0096507
PARD3B	136.963	3.29566	5.36107e-06
LRATD1	155.821	3.30873	4.34556e-19
ANXA8L1	11.1031	3.35495	0.0233747
GADD45G	24.8076	3.37695	0.00012682
PCDH19	53.9813	3.4027	3.98315e-05
CCK	14.0461	3.43681	0.00559057
ANKRD18A	84.0239	3.46612	7.10244e-08
PCDH8	14.1212	3.58289	0.0105311
PRRX1	90.4035	3.60739	6.81751e-09
NA	20.853	3.68275	0.000320186
NEFL	128.68	3.69374	8.91988e-16
WNT7A	9.36906	3.69996	0.0238766
FAT2	111.572	3.74228	1.30076e-24
TMEM132C	50.7556	3.8218	6.63792e-05
MUC6	20.7097	3.86777	0.00191586
LRRC55	27.1444	3.8974	0.00984614
CSMD2	33.5869	3.97466	1.32538e-05
TUBA3E	37.0321	4.00639	0.00596849
ALDH1A1	23.0848	4.1235	0.00268659
LRP2	222.158	4.13148	1.28804e-12
KRT15	126.109	4.14775	1.39721e-15
SAMD5	253.303	4.15216	1.03943e-33
COL22A1	15.4996	4.20622	0.000993311
LPAR3	40.5379	4.36228	2.73029e-08
IGHE	8.48758	4.53344	0.0238283
ANKS1B	15.2707	4.55223	0.00382624
NTRK2	30.0855	4.59286	9.115e-07
KRT5	95.0469	4.72028	4.86977e-14
PADI3	38.3252	5.14491	8.34689e-10
MPPED2	46.8764	5.23004	4.37241e-07
RSPH10B2	37.9548	5.23864	0.00536988
ANXA8	13.9346	5.27074	0.0027056
LSAMP	90.4319	5.78929	4.74167e-12
KCNA1	127.974	5.92164	7.1175e-15
BMS1P9	8.04158	6.71208	0.00956065
DACH1	14.3242	6.8403	0.00302121
ATP10A	23.5651	6.86451	0.00068457
LINC01582	6.48892	7.31346	0.00675462

## Sheet: DEG_YT_shYEATS2_VS_shNT_pad
ext_gene	baseMean	log2FoldChange	padj
MYH13	148.802	-12.0707	1.68878e-13
MYH8	692.77	-11.6525	1.36493e-20
MYH1	59.0316	-10.5889	1.4816e-10
MYH4	22.2407	-8.99245	4.3756e-06
MYHAS	16.3751	-8.91668	2.09973e-06
IDI2-AS1	17.0254	-8.80858	7.85952e-07
HCG9	53.194	-8.71215	4.13867e-05
NA	48.271	-8.33922	1.24249e-06
TRIML2	1331.66	-8.32367	1.65891e-10
NA	69.4296	-8.32087	3.36377e-06
TMEM132C	50.7556	-8.29952	6.32758e-07
PHF24	74.394	-8.12961	9.86043e-09
ZNF727	15.8328	-8.12609	1.37576e-05
TCL1B	53.3057	-8.11333	2.72608e-06
TAGAP	30.9292	-8.07691	3.04836e-06
NA	12.338	-8.03519	0.000138865
KLHDC7B	70.6784	-8.01124	1.01559e-15
WFDC21P	64.0083	-7.98802	5.50989e-06
SILC1	61.2741	-7.91164	5.27135e-15
LCN2	26.3053	-7.91156	7.86193e-06
AC006970.2	32.4674	-7.74105	6.4164e-06
FGF21	7.5998	-7.69057	0.000531867
AL136962.1	98.3065	-7.65497	1.95e-19
NMUR2	11.8794	-7.61412	8.49576e-05
WT1-AS	162.301	-7.54686	1.11838e-15
IGKC	6.21843	-7.54308	0.00137264
LRRC15	16.4819	-7.52129	8.06139e-05
HSPB2-C11orf52	61.8183	-7.51978	0.000576035
CHRM3-AS2	6.12422	-7.49772	0.00248768
COL22A1	15.4996	-7.47626	8.80218e-05
RFPL4A	25.9498	-7.46823	1.92211e-05
LINC01519	7.85102	-7.34714	0.00170069
PAX7	10.2707	-7.30666	0.000175561
AOC1	32.6049	-7.2627	3.39846e-05
TRPV6	103.385	-7.26172	2.83639e-19
NA	6.20666	-7.23312	0.00391551
LINC01933	11.3747	-7.23124	0.00393873
CCR8	21.5175	-7.20595	0.00134429
GALP	6.48789	-7.15778	0.00114208
TTPA	11.7804	-7.13321	0.000319268
AC243960.1	8.97493	-7.11504	0.000249058
KLK8	8.74373	-7.05852	0.00108764
NA	17.1857	-7.05639	0.00257284
NA	13.9746	-7.0453	0.00826802
PLEKHA3P1	6.45771	-7.03367	0.000649335
LINC02254	4.7446	-7.02358	0.00676133
CES5A	6.03159	-6.98341	0.00305922
HNF4A	22.1918	-6.94171	5.91598e-06
HNRNPA1P21	18.3238	-6.93949	0.00202045
CDX2	14.5421	-6.92667	0.000126982
CCND2	14.6633	-6.88491	0.000307836
PRIMA1	10.0717	-6.8678	0.00082289
DUX4L31	4.44578	-6.79804	0.00795319
TMEM179	17.9488	-6.79114	0.000642604
KLK15	3.88287	-6.75662	0.0127986
AC005323.1	3.7304	-6.74329	0.0390681
TAT	13.3999	-6.73985	0.000502603
LRRC55	27.1444	-6.69264	0.000177539
CALB2	407.135	-6.65072	7.2238e-08
AL139327.1	11.2876	-6.62604	0.000563456
NA	6.37129	-6.59321	0.00369737
LINC02368	4.16296	-6.58135	0.00750408
MYH2	211.88	-6.56542	7.39045e-05
AC069280.1	4.59159	-6.55382	0.00355917
SULT2A1	84.648	-6.47292	1.36605e-19
NA	6.72802	-6.46847	0.0215369
TRPC7	44.9013	-6.46826	6.32209e-12
NA	4.63129	-6.46041	0.0175271
OR2T32P	6.02341	-6.4568	0.0152419
DUX4L45	13.8935	-6.45454	0.000693077
NA	5.25406	-6.44345	0.0029846
WDFY4	12.9992	-6.43675	0.00872071
TRIML1	30.9451	-6.43194	0.000654031
GPR12	6.70011	-6.42013	0.00238869
SLITRK2	16.2718	-6.39678	2.88237e-05
LYPD9P	45.4022	-6.38293	4.40339e-12
SFRP5	20.8562	-6.36792	0.000693077
SOX11	12.0052	-6.36124	0.00116755
RFPL4AL1	13.8182	-6.34469	0.0013825
AC078925.4	15.9278	-6.34	0.000929199
CTAGE15	9.466	-6.33387	0.00213698
AC005307.1	604.703	-6.32961	1.81755e-31
DRD5P2	3.99902	-6.31644	0.0286236
WT1	424.94	-6.30874	2.61729e-20
LAMA1	2598.25	-6.21838	1.44868e-95
HRG	4.7967	-6.20966	0.00593185
ZNF423	118.959	-6.18721	2.07985e-16
AP1M2	90.4861	-6.1741	4.79026e-20
ADAMTS18	19.5378	-6.16813	0.00299468
RIMS4	343.255	-6.16131	3.50084e-29
PARM1	1984.71	-6.14854	4.47591e-13
ATP10A	23.5651	-6.13449	5.45383e-06
AC027348.1	4.25783	-6.09895	0.0142987
DCLK3	14.5236	-6.09531	0.00102525
FNDC1	281.067	-6.09161	5.72793e-10
COBL	111.307	-6.08294	0.000177442
IP6K3	85.1802	-6.05929	1.89327e-20
GSTA1	6.15716	-6.04417	0.0102902
TMEM132E	16.8883	-6.0352	2.15016e-05
CDH12	54.5216	-6.01799	1.95633e-08
FIBIN	11.6639	-5.97537	0.000180451
CEACAM21	55.355	-5.93736	8.41348e-09
LINC01262	14.5586	-5.93232	6.45364e-05
SLIT3	780.564	-5.93137	1.13032e-36
REN	6.05332	-5.92888	0.00841225
CRYAB	3829.19	-5.89535	3.83159e-12
IGSF5	73.6239	-5.89264	1.95779e-21
CYP4F22	8.04656	-5.88959	0.0045945
MCTP1	334.482	-5.86468	4.26873e-09
TRABD2B	40.2766	-5.86323	6.19964e-05
NA	7.04561	-5.83862	0.00801139
LINC01582	6.48892	-5.83369	0.0142257
SHISA3	299.741	-5.816	9.30089e-18
MYH15	39.5307	-5.81182	2.12842e-06
EBF3	63.4126	-5.81149	5.70199e-15
AC136628.1	9.19375	-5.78736	0.0031716
LINC02211	7.26153	-5.72518	0.00201909
UGT3A1	28.0532	-5.70203	0.00149171
DAPL1	113.088	-5.69577	1.60917e-15
GSTA3	10.5003	-5.68133	0.00864009
NLRP5	59.0657	-5.67809	8.8757e-14
MAPK4	29.6924	-5.65768	0.00894899
SIGLEC14	38.2101	-5.63483	2.78546e-05
SMOC2	35.3824	-5.62354	0.00384093
CLEC3A	32.6793	-5.61915	1.60878e-10
RAI2	5.82387	-5.61591	0.0212686
NRXN3	104.714	-5.61423	9.18175e-14
DUX4L46	7.0686	-5.60954	0.0076974
USH1C	3.99397	-5.59059	0.0494144
AL117378.1	114.005	-5.56996	1.1359e-21
DSG2	296.564	-5.56826	8.62009e-30
ATP1A2	159.33	-5.56805	8.67309e-28
NA	10.2857	-5.54469	0.00841419
SULF1	5.66511	-5.54175	0.0304166
CTNNA2	10.3997	-5.53826	0.000915992
LINC02617	4.44875	-5.49712	0.0206223
CST2	35.9971	-5.48349	3.3737e-11
AC142384.1	4.70274	-5.43679	0.022157
SH3GL3	128.524	-5.42997	9.94726e-28
PRKCB	2720.01	-5.42339	2.00182e-35
OR2T8	9.23461	-5.35287	0.0231301
RPSAP41	9.7597	-5.35168	0.027856
SDK2	51.1493	-5.34566	2.55552e-07
AL161908.1	4.08881	-5.30947	0.0287723
GPC4	1336.9	-5.30838	3.62974e-125
ZNF300P1	9.20513	-5.28823	0.0175145
MYBPC2	12.1995	-5.2457	0.000193892
PNMA3	332.84	-5.19247	1.97065e-53
AL499616.1	13.3883	-5.18665	0.0141583
GIMAP8	51.9744	-5.14202	9.7823e-11
TLX1NB	3.97423	-5.13635	0.0436313
PRR18	5.0446	-5.13119	0.0250714
CUX2	157.634	-5.12475	1.56277e-10
AC008514.1	112.253	-5.11779	1.4841e-18
MEGF6	167.785	-5.10171	5.49761e-16
DDIT4L	7.3274	-5.09312	0.00343684
RGS8	22.5137	-5.07928	0.00999965
ERVFRD-1	8.1616	-5.07582	0.00284607
CHGA	625.437	-5.07527	9.96011e-08
CHST4	70.6306	-5.04479	3.1344e-09
NR1H4	297.901	-5.02089	3.461e-23
SDR42E1	119.106	-4.9981	2.66928e-13
TENM2	450.308	-4.99432	2.04872e-22
FGF19	10.5273	-4.99053	0.00247907
BCAN	248.892	-4.98579	4.76354e-07
PROX1-AS1	9.50492	-4.96547	0.0173587
ZNF98	28.6785	-4.95299	5.97458e-07
ZFP42	538.134	-4.94813	2.16484e-05
KIAA1210	145.403	-4.94776	1.80748e-07
GDF15	136.255	-4.93926	3.79612e-20
FAM30A	7.00482	-4.93883	0.03507
CACNA1E	52.2429	-4.90824	8.90404e-10
FREM1	1180.16	-4.90263	1.47547e-06
AC015987.1	4.76852	-4.8952	0.0287723
CILP	27.3464	-4.89099	5.96463e-08
AC100868.1	3.95327	-4.86453	0.0459022
FEV	10.1278	-4.82531	0.0427215
KCNA1	127.974	-4.8237	0.0138695
NA	16.0558	-4.82229	0.0170662
OLFM4	26.5614	-4.8	0.0198729
GRID1	65.1586	-4.79512	1.84615e-13
TMEM176A	36.1416	-4.77893	1.3675e-07
PRDM16	12.1088	-4.77659	5.47245e-05
GPX3	1552.89	-4.77642	2.26572e-10
NA	7.27193	-4.75816	0.0251538
CHP2	100.612	-4.74346	6.0845e-10
DDC	20.21	-4.73543	0.0451536
LOXL1	21.565	-4.73069	0.0158785
NAALAD2	32.7039	-4.72934	5.98933e-07
INMT-MINDY4	20.5618	-4.72242	0.0108017
CX3CL1	602.025	-4.7125	7.59397e-27
PPP2R2C	14.7475	-4.70242	0.00363688
AQP10	14.0053	-4.68318	0.00167565
STOX2	129.444	-4.68216	8.47133e-08
SUSD4	14.3515	-4.67567	0.0314647
ATP6V0D2	4.84058	-4.67365	0.0306616
SLC6A12	210.923	-4.64719	1.1716e-19
POM121L2	17.9066	-4.64382	7.59919e-06
LINC-ROR	6.73274	-4.64185	0.0407196
INHBE	515.418	-4.63195	1.71305e-07
IL20RA	11.4803	-4.6113	0.000663124
MATK	40.1561	-4.60554	0.00609312
LINC01081	12.283	-4.58648	0.000175488
TUBA3C	210.22	-4.57627	1.85768e-10
PTN	20.5444	-4.56514	0.000930258
AC008870.2	9.69469	-4.5604	0.0368173
NA	5.8202	-4.55459	0.0420825
MARVELD3	97.8142	-4.48789	9.28065e-24
KLHDC7A	45.1184	-4.47599	5.97127e-11
FOXQ1	6.41328	-4.46691	0.00898004
AC024022.1	5.47265	-4.46487	0.0174925
TFCP2L1	28.6305	-4.45506	1.49284e-07
GJB2	13.6146	-4.4533	0.0345236
GRIA1	257.967	-4.4483	1.22979e-12
KRT17	18.0991	-4.44257	0.00254142
INSYN1-AS1	17.2599	-4.44156	0.000201449
L3MBTL2-AS1	17.1565	-4.4283	1.54574e-05
OSCAR	98.2405	-4.4219	8.37614e-27
TMEM233	21.0967	-4.41928	6.87474e-05
LINC02167	30.6877	-4.41613	1.80056e-06
NOX4	5.76276	-4.41601	0.0102902
SCTR	53.0559	-4.41446	1.87849e-11
OCA2	17.7797	-4.39733	8.09661e-05
GDAP1L1	21.6171	-4.38712	0.000384927
CLEC4M	30.325	-4.38405	9.60334e-10
CYP3A7	21.6835	-4.36738	0.0141963
INSYN1	511.914	-4.35025	1.43759e-28
BTK	16.4432	-4.34757	2.49702e-05
AC237221.1	43.0067	-4.34139	3.81034e-09
AC148476.1	11.7179	-4.33049	0.00254232
SV2B	127.394	-4.32177	4.76918e-30
CHRD	93.0768	-4.32127	3.88565e-19
SHANK2	24.4374	-4.30966	8.79626e-06
ADGRD1-AS1	14.4254	-4.30857	0.0457674
AGBL1	14.3702	-4.30473	0.000176765
C6orf223	9.25311	-4.30102	0.00364602
TMEM176B	38.9979	-4.29608	2.88604e-10
GPC3	320.761	-4.28007	5.01949e-22
AC120036.1	8.59634	-4.27557	0.0120241
FAM149A	79.8181	-4.26966	3.18892e-15
FBN3	29.0958	-4.25205	0.000797371
STK32A	25.3994	-4.22871	0.000207928
ENPP6	21.3093	-4.22822	7.71848e-05
DHRS3	17.8463	-4.20348	2.39033e-05
ZBED6CL	18.316	-4.19995	0.000158048
AC100803.3	9.34872	-4.19402	0.00870935
NA	304.066	-4.19033	4.55442e-20
LINC02582	60.1454	-4.17022	7.99493e-07
TMEM51-AS1	66.5842	-4.16958	5.62018e-12
CACNG3	6.61723	-4.12604	0.0294486
SHISAL1	228.019	-4.10457	1.3456e-11
FAM87A	13.6642	-4.10297	0.00148409
SPNS3	5.82047	-4.10234	0.0460625
FABP3	79.2301	-4.10096	7.44857e-13
CFAP221	20.753	-4.09529	0.000755253
MMP28	65.0705	-4.08914	4.58662e-05
PKP1	10.3289	-4.0859	0.00709133
TREML3P	9.08817	-4.07923	0.0397461
LINC00865	12.684	-4.07311	0.00906939
AC104791.1	6.93182	-4.0729	0.0290414
NA	6.12193	-4.07115	0.0440747
ADCY2	115.106	-4.06561	1.28826e-09
SLC7A3	49.0331	-4.05791	1.99517e-05
NA	537.156	-4.05775	8.44437e-24
NA	13.7515	-4.04847	0.00285884
SEMA6A	614.172	-4.04157	1.87102e-20
RARRES2	7215.29	-4.04114	1.06364e-17
CDHR1	15.9196	-4.03001	0.00575418
NTRK1	60.5613	-4.02108	1.71764e-11
AC005336.1	19.599	-3.99751	0.000685453
IL1RL1	10.0353	-3.99279	0.00883512
LIMS2	352.336	-3.98976	8.57407e-17
IRF8	40.9138	-3.98906	2.51868e-06
KCNQ1	12.7332	-3.98355	0.00390994
WSCD1	303.932	-3.9831	4.79643e-17
GJA1	8.19511	-3.98194	0.0134163
ESR2	37.7336	-3.96835	1.93542e-11
LMOD1	169.724	-3.96251	6.84783e-27
C8orf49	53.0657	-3.96049	9.60334e-10
CLCNKA	18.2259	-3.95533	0.000133469
LEMD1	42.68	-3.95394	2.81807e-05
SAMD5	253.303	-3.9442	2.18918e-27
GPR27	25.6553	-3.93439	0.0059251
BMP7	1074.11	-3.93395	2.24865e-42
KIF26B	20.2691	-3.92934	0.00188724
AL356515.1	6.55347	-3.92423	0.0289187
DUSP26	45.6707	-3.92311	2.86017e-09
GADD45G	24.8076	-3.92206	0.000255869
TCHH	19.3505	-3.91987	1.39387e-05
CACNA2D2	102.542	-3.91673	4.14555e-13
PTGDS	193.603	-3.91246	1.49533e-34
NPHS1	14.0221	-3.90858	0.00084959
THPO	8.59872	-3.9009	0.0227481
PLCH1	85.8744	-3.8976	9.96984e-20
LINC01287	21.8857	-3.89631	0.000654486
MUC3A	29.1267	-3.88546	1.35476e-05
SELP	160.703	-3.8817	1.03802e-09
ZNF114	311.372	-3.87363	6.76835e-34
PLIN4	108.419	-3.87331	1.37976e-18
FSTL4	20.8678	-3.87326	2.90532e-05
NRCAM	106.766	-3.85958	8.54011e-22
RPSAP70	12.7691	-3.8539	0.0075892
ERG	315.659	-3.84732	8.95711e-13
THNSL2	64.5478	-3.8236	8.04546e-11
AC018647.1	10.0093	-3.81947	0.0149016
NA	65.2955	-3.8138	6.77535e-10
INMT	1378.13	-3.80428	1.77056e-06
PEG3	5782.58	-3.79483	1.26356e-31
SELE	13.6152	-3.78783	0.0072199
FBLN5	715.206	-3.78145	1.26356e-31
TMEFF1	122.345	-3.76798	8.71887e-06
SLC47A1	148.277	-3.74914	6.97374e-13
GPR1-AS	7.16665	-3.74277	0.0313983
MFAP4	1475.53	-3.73959	5.93928e-42
AL160191.3	9.32221	-3.72513	0.00960859
AC092447.8	17.1666	-3.72427	0.000138164
AC109635.3	46.152	-3.7217	2.06969e-08
ZNF716	46.1438	-3.71819	2.44354e-09
AC010327.5	9.63054	-3.71705	0.00841225
ESR1	20.9478	-3.71504	0.00462584
ILDR2	37.0209	-3.71301	0.000112183
TBX15	23.5043	-3.70966	2.85373e-06
PKD1L2	564.186	-3.70621	1.37105e-66
KCNJ6	362.539	-3.70475	2.25813e-09
CD5L	7.97211	-3.69638	0.0149753
CEBPA	56.4506	-3.69529	3.83885e-09
CAVIN4	29.7377	-3.68483	2.31725e-06
AMHR2	10.5479	-3.67345	0.0120446
TMEM255A	459.642	-3.66645	2.23317e-44
MRO	67.0013	-3.65775	3.14094e-07
TMEM47	6.84298	-3.65628	0.0318986
KCNF1	65.766	-3.65144	2.29591e-08
AC247036.1	47.4164	-3.64944	3.62064e-06
IL34	25.9818	-3.64326	0.000714229
ADGRB1	63.5674	-3.62538	1.38915e-06
NPAS1	730.116	-3.62417	2.61756e-21
ASPA	46.6297	-3.6241	1.51815e-07
GPR1	116.408	-3.62038	2.6066e-17
FAM49A	291.85	-3.61018	1.61282e-44
POU2F3	16.462	-3.60753	0.0077342
LINC01139	74.2232	-3.59817	3.8287e-11
NPY1R	28.432	-3.58134	4.41503e-05
PALMD	34.7523	-3.56884	4.73438e-08
LILRA2	12.1296	-3.56427	0.00205626
GALR1	64.0183	-3.54315	1.76124e-07
NA	23.0452	-3.53481	2.28527e-05
LMX1B	103.553	-3.52798	1.5657e-13
BTNL9	86.5282	-3.5127	1.27745e-07
TUBA3E	37.0321	-3.50343	0.0017792
ULBP1	436.862	-3.49318	9.41773e-34
GJB3	10.1429	-3.49123	0.0111467
NEFL	128.68	-3.48273	9.13946e-10
AC104129.1	8.51016	-3.48119	0.00791407
UBD	15.2558	-3.46007	0.00135362
H19	5040.91	-3.44502	3.88565e-19
GFRA2	76.0999	-3.4347	3.19096e-08
ERVV-2	39.5215	-3.43451	1.39151e-06
UGT3A2	1220.41	-3.42376	9.12068e-51
KLHDC8A	17.4483	-3.41998	0.00753772
LINC01356	49.4035	-3.41907	4.73208e-09
VAV3	75.942	-3.41196	3.31462e-10
AC009055.2	58.9726	-3.4062	1.07073e-10
SOX8	24.2826	-3.39831	0.000103007
NA	13.3351	-3.39226	0.00750872
AC097359.2	157.669	-3.3899	6.66629e-29
NUDT10	24.1872	-3.38696	4.26189e-06
RSPH10B	53.7801	-3.3807	0.00534236
FAM155B	262.062	-3.36164	1.3184e-21
CACNA1H	41.5383	-3.35364	1.46206e-06
SUCNR1	17.2759	-3.33363	0.000801208
ACTN2	32.2946	-3.32576	0.00793268
LRP3	506.976	-3.32549	1.33237e-15
KLK6	10.4978	-3.32427	0.0145353
NOG	81.3798	-3.31948	1.1679e-10
ZGRF1	415.221	-3.31764	1.47543e-11
ZNF536	9.75095	-3.31554	0.0208114
TP73	16.5529	-3.30701	0.00555104
BANF1P2	6.72248	-3.29434	0.0388644
NA	11.7037	-3.29061	0.00310678
TUBA8	63.6327	-3.27996	0.00249516
PRDM13	31.4028	-3.27794	3.30498e-05
TLR4	811.536	-3.27784	2.40793e-20
CXADR	664.91	-3.27562	2.19649e-19
NPTX2	376.115	-3.27014	1.87773e-24
PRRT4	83.1079	-3.25942	8.04949e-09
PPP1R14C	9.6038	-3.25885	0.014301
CHRM1	42.639	-3.2467	6.25109e-05
NTF3	96.8316	-3.23956	5.17113e-09
RPLP0P2	160.308	-3.23573	2.06698e-11
ASAH2	55.0425	-3.23253	0.00700546
CLDN2	22.5763	-3.23238	0.0320975
VLDLR-AS1	46.493	-3.23211	3.35484e-06
ALPL	33.7698	-3.23081	0.000125749
AC091078.1	7.41336	-3.22727	0.0290827
DOCK3	196.831	-3.21975	2.12878e-22
HSPB2	93.3565	-3.21925	6.64654e-07
SLC13A5	154.615	-3.21712	5.88848e-18
ZNF454	100.027	-3.21213	1.02033e-12
COLCA2	7.48022	-3.20271	0.0329046
KCNAB2	1475.03	-3.20025	8.84066e-36
LINC00508	46.1683	-3.19793	2.15963e-07
NTN1	60.2539	-3.19355	4.51386e-06
UNC5B	1289.28	-3.19028	6.34877e-49
JAKMIP3	47.8577	-3.18421	2.7429e-06
STUM	18.1509	-3.17929	0.0270737
CHRM4	72.1678	-3.17818	2.28824e-09
TSPEAR-AS1	14.3818	-3.16815	0.0100599
DES	38.3913	-3.16791	6.14293e-05
NLRP2	66.6303	-3.16452	4.5344e-06
ST6GALNAC3	222.932	-3.16166	4.17958e-07
BTNL8	8.04285	-3.1593	0.0323245
HPN	12.1868	-3.15605	0.0026958
SPP1	4337.69	-3.15463	1.55909e-34
ALOXE3	26.723	-3.15236	1.45769e-06
CT45A7	22.8572	-3.14759	0.00755548
AC104257.1	11.1429	-3.14539	0.027856
SYK	11.3697	-3.13331	0.0221837
NA	16.7495	-3.13087	0.0189861
AC138028.6	10.175	-3.12363	0.0114618
DEFB1	27.4173	-3.11524	6.32574e-06
ARHGEF16	49.1654	-3.10734	5.42891e-06
HLA-DMB	631.07	-3.10622	2.93318e-20
C5orf66	15.2225	-3.10301	0.0118015
IFI27	478.375	-3.10109	2.3981e-09
PCDH1	2239.61	-3.08097	1.92294e-21
MSI1	122.081	-3.08073	8.92321e-11
KCNJ4	34.9889	-3.06917	7.79626e-07
C1S	2815.25	-3.06627	1.43759e-28
IL33	82.5293	-3.05734	1.34768e-09
USH1G	18.8724	-3.05711	0.0118359
PCSK5	821.715	-3.05074	1.27707e-24
SIGLEC5	38.4642	-3.04793	0.00244731
GIMAP5	89.9714	-3.04596	2.91446e-11
FBXL7	121.869	-3.03802	7.05712e-14
APCDD1L-DT	100.606	-3.03737	3.86885e-10
ZBTB7C	420.668	-3.03671	2.15198e-14
ACTL8	41.6611	-3.03631	0.00177694
ELAVL2	50.6216	-3.03507	0.0032861
ATP2B2	90.8594	-3.02581	5.62782e-09
IGSF9B	85.6897	-3.02255	3.45132e-05
SLC1A6	103.408	-3.01495	2.41024e-10
LINC02159	37.1097	-3.01361	0.00012894
PLP1	431.495	-3.01025	0.00122285
NEBL	184.482	-3.00405	1.45831e-12
AC118758.3	58.9708	-2.9989	0.0209257
NEFM	55.756	-2.98843	0.00173242
MORC2-AS1	19.0167	-2.98756	0.00546099
HSPB8	995.542	-2.98676	8.67309e-28
UCA1	1516.43	-2.98626	1.45971e-21
AC100802.1	57.2115	-2.97774	1.39868e-06
DACH1	14.3242	-2.97183	0.035599
ADCY5	25.7926	-2.97015	0.000779692
AC027612.2	12.5804	-2.96712	0.0265938
KLF15	139.536	-2.96243	7.14364e-13
ADAMTS2	462.769	-2.95753	5.1242e-13
PRKCQ	20.2786	-2.95313	0.0237835
KIF1A	48.7016	-2.94766	0.000260449
CAMSAP3	165.772	-2.94621	7.89337e-10
SYT2	15.6031	-2.94103	0.0499496
CYP4F11	427.536	-2.9409	3.97391e-07
NA	10.1544	-2.93505	0.0195774
PCSK2	37.1838	-2.93258	0.00467311
WSCD2	30.2956	-2.93231	0.0314273
KREMEN2	307.07	-2.92618	7.05974e-13
STC2	3185.23	-2.92518	2.70586e-13
C7orf57	34.0317	-2.91929	7.05303e-06
NA	149.906	-2.91899	2.38023e-08
GJA3	379.977	-2.89958	4.36952e-32
AC018755.2	73.2106	-2.89338	7.55816e-07
CALB1	23.3464	-2.89037	0.000383228
PRSS16	106.289	-2.88555	1.17909e-08
ZNF676	18.2595	-2.88276	0.00680332
CHST1	265.268	-2.85797	1.69672e-08
AGBL4	14.0823	-2.85299	0.00926137
BMP6	166.301	-2.85011	9.3953e-18
CYP2B7P	12.6863	-2.8449	0.0281736
LINC01293	10.2513	-2.84172	0.01984
CTH	535.5	-2.83754	1.64461e-18
ESPNL	12.1478	-2.83456	0.0260127
MAT1A	901.902	-2.83141	4.07499e-28
RGMA	71.2057	-2.82538	0.0016344
TSHZ2	135.425	-2.82351	0.0039579
CHODL	15.8652	-2.81874	0.00532117
DUSP9	207.21	-2.81767	6.4874e-14
ADGRD1	32.2745	-2.81718	0.000646634
AC112721.1	11.8798	-2.79896	0.0355893
TENM1	2308.47	-2.79887	4.59959e-09
GRIK4	24.4961	-2.79879	0.000919374
PPFIBP2	362.375	-2.78925	2.55083e-21
ONECUT2	99.6362	-2.78583	6.41276e-10
HUNK	308.368	-2.78571	1.27415e-08
ANK2	891.092	-2.77437	5.30844e-11
CELF2	383.492	-2.77175	7.01845e-32
LCP1	215.9	-2.76522	6.02152e-07
WDR86	554.921	-2.74793	4.25467e-26
PDE2A	258.49	-2.74125	0.000263661
P2RX7	923.847	-2.73916	3.60663e-28
NA	49.0858	-2.73045	0.00568478
AL117335.1	11.8226	-2.72458	0.0241199
CLCN5	385.033	-2.72425	3.27113e-12
TMEM132D-AS1	668.587	-2.72382	2.26293e-15
CXCL14	658.226	-2.71937	5.78279e-09
WDR86-AS1	72.3745	-2.71667	8.74977e-06
IL17D	45.9005	-2.71079	3.27717e-07
TNMD	32.5506	-2.70778	0.000570853
NTF4	39.1114	-2.70328	1.25947e-05
SPTA1	34.1564	-2.70088	0.0210341
LINC00426	12.44	-2.69576	0.0287128
KEL	77.1824	-2.69474	2.9564e-06
RGS16	580.172	-2.68944	1.1729e-18
OR2T33	19.7776	-2.68255	0.00164025
KLK1	55.5176	-2.67277	2.24807e-05
SYT7	229.465	-2.67188	2.91495e-12
SPARCL1	742.399	-2.66545	2.42965e-16
PPIL6	26.4007	-2.66004	0.0392328
AC073343.1	17.9157	-2.65842	0.00889173
OLFML1	50.2321	-2.65616	3.8799e-05
SLC30A2	27.3435	-2.65172	0.0321301
KCNA2	47.419	-2.64308	0.000821184
MYL3	14.1585	-2.64176	0.0403953
TCL1A	116.855	-2.64008	6.40439e-07
AC040168.1	18.1539	-2.62364	0.0068825
AP001528.2	31.9157	-2.62055	0.00275705
MAGEA11	1050.46	-2.61761	5.6045e-11
RRAGD	709.4	-2.61456	4.73323e-33
CLGN	86.0431	-2.61002	4.4032e-05
CRYBG2	23.7912	-2.60681	0.00648822
PIP5K1B	64.5364	-2.60539	6.37898e-07
PRKAG2-AS1	41.1193	-2.60531	2.58784e-05
POM121L9P	20.1769	-2.60348	0.00155392
IRS4	17.7672	-2.60181	0.0118171
KCNK3	25.0387	-2.60108	0.0139396
DTX4	375.047	-2.59944	1.31206e-13
ACSM5	27.4709	-2.59208	0.0044241
CEBPA-DT	35.5994	-2.59191	1.86907e-05
CCDC169-SOHLH2	38.7052	-2.58716	0.000128019
LINC02600	39.012	-2.58019	0.000159601
MNX1-AS1	63.3923	-2.57651	8.52904e-06
PLAC1	37.815	-2.57114	3.53497e-05
EPPK1	50.0191	-2.57066	4.28446e-05
KCNH2	213.182	-2.56598	4.03024e-15
NECAB2	68.2199	-2.56359	5.62077e-08
ZIM2-AS1	41.2897	-2.56053	0.0184394
TKTL1	59.2551	-2.55781	2.66768e-05
TMEM74B	172.144	-2.55299	4.75015e-08
TTYH1	117.564	-2.54922	0.00343684
NA	15.0277	-2.54843	0.0352197
LINC01133	21.8308	-2.54783	0.007289
TMEM266	52.1249	-2.54586	7.95942e-06
NTRK3	170.448	-2.54406	4.10946e-06
HEY2	77.433	-2.53515	1.48531e-06
AC003975.1	14.1646	-2.53513	0.0188825
RTN4R	315.985	-2.52802	9.30175e-09
NA	29.398	-2.52709	0.00106948
ASNSP1	225.314	-2.52618	3.09088e-07
SLC7A11	896.111	-2.52047	0.00571021
XYLT1	1563.12	-2.50661	7.27206e-47
ATF3	272.449	-2.50625	7.64156e-17
ADM2	699.858	-2.50498	1.46293e-07
CNTFR	1505.8	-2.49469	2.19544e-11
FAM83H	326.456	-2.48849	7.31127e-09
ZNF99	9.53432	-2.48703	0.0285197
AP006333.1	126.9	-2.48676	2.35193e-12
GRIK5	52.9516	-2.48558	0.00157713
RFTN2	52.5391	-2.47383	0.000102805
PPIAP46	21.8234	-2.47052	0.00223136
CCL15	36.597	-2.4656	0.000113169
FUT1	113.122	-2.46121	1.8112e-11
KCNIP1	84.8233	-2.45287	5.19755e-05
LRRC37A7P	54.2386	-2.44778	1.94994e-05
NA	110.783	-2.43962	4.50677e-10
ATP1A3	184.546	-2.43913	1.25648e-13
NA	27.676	-2.4388	0.00856032
AC136604.3	14.5547	-2.43865	0.0139016
WIPF3	24.4201	-2.43276	0.00873231
ZNF492	68.7042	-2.42944	8.46389e-06
KLK10	22.3747	-2.4216	0.00201926
CD8B	14.2599	-2.42128	0.0246265
COL6A3	2994.63	-2.42085	1.09247e-18
ACY3	129.862	-2.42048	0.000153654
UPP1	1694.72	-2.41479	8.62539e-11
SHANK1	100.47	-2.41152	1.42459e-11
FAT2	111.572	-2.40535	1.08679e-09
ACSS3	124.794	-2.4038	8.32415e-10
GFRA3	187.974	-2.39714	7.85952e-07
SH3RF2	151.312	-2.393	1.81244e-11
BLVRB	2138.04	-2.38941	2.3624e-10
SLC7A5	11310.8	-2.38831	8.7652e-14
WNT10B	51.3989	-2.38761	1.56141e-05
IGFBP5	27458.8	-2.37793	2.28226e-11
AC011476.3	81.5363	-2.37731	5.28905e-09
MIR924HG	36.7814	-2.37588	0.00236515
CSF2RA	645.111	-2.37303	3.20092e-22
TRPM8	12.2777	-2.37067	0.040659
ASS1	709.649	-2.36421	1.09083e-05
ATG9B	77.733	-2.35133	0.00183881
LARGE1	633.247	-2.34986	2.61053e-27
NA	36.2324	-2.34872	0.000819562
NAP1L3	82.0276	-2.34742	7.49033e-07
SOHLH2	108.573	-2.34219	2.80281e-12
SULT1C2	232.948	-2.34214	3.85528e-11
ACPP	11.5446	-2.34148	0.0421907
RB1CC1	1838.03	-2.34124	5.73743e-07
SLCO5A1	38.1917	-2.33863	0.0450059
DNAH10OS	18.4678	-2.33798	0.017203
SMTNL2	29.01	-2.33055	0.02379
LINC01639	14.0538	-2.32147	0.0427876
ELFN1	246.365	-2.31887	8.95711e-13
GREB1	372.377	-2.31884	4.4218e-22
CEROX1	30.0664	-2.31838	0.0108107
TNN	53.6951	-2.31713	2.90559e-05
FAM180A	20.1329	-2.31043	0.00654078
AC010719.1	32.2615	-2.30935	0.0106595
CGNL1	590.8	-2.30312	1.74566e-25
IDH1	8923.76	-2.30074	2.31056e-17
TRIM29	143.391	-2.29643	0.000158048
MGAT3	833.348	-2.29184	2.18611e-23
SULT1A2	326.088	-2.29087	2.7466e-07
VSTM4	424.56	-2.27927	2.66375e-13
TNFSF9	134.01	-2.27427	5.78943e-07
SMAD9	278.407	-2.27279	2.05498e-13
AC131009.3	12.5757	-2.27175	0.0417803
CCDC169	181.318	-2.26697	2.32757e-12
COL2A1	668.32	-2.26607	0.000241901
UNC5D	17.9435	-2.25794	0.0211207
LRRC32	270.915	-2.2546	1.03985e-09
PSAT1	10696.8	-2.25391	3.06955e-10
TEX15	79.5741	-2.24876	0.00318134
C22orf34	33.1845	-2.24801	0.00181582
AC092447.5	10.4562	-2.24665	0.0407995
LRP2	222.158	-2.24456	0.000241901
DUSP2	193.106	-2.24168	5.05621e-05
RAP1GAP	251.381	-2.24046	1.48161e-09
CD48	14.476	-2.24022	0.0392551
C21orf91	805.018	-2.23683	9.21482e-09
C1orf158	14.2167	-2.23661	0.0240897
OLFM1	339.579	-2.23534	1.27676e-07
SNX10	282.384	-2.23517	5.37876e-07
AC139491.2	20.4224	-2.22872	0.0352051
FERMT3	262.682	-2.22708	1.90067e-06
MAGEB6	21.8868	-2.2218	0.0166473
TRIM74	20.4103	-2.22067	0.03492
GATA4	1572.17	-2.22026	1.17175e-16
CREB5	407.914	-2.21714	6.61369e-10
ACKR3	46.0796	-2.21481	0.00684016
TM6SF1	111.47	-2.21362	0.000117777
TLX1	49.8802	-2.21303	0.00410825
KCNJ11	33.1126	-2.21185	0.000510941
HPGD	16.1471	-2.21159	0.0425716
AP000662.1	71.131	-2.2095	0.000145194
MACROH2A2	383.624	-2.2089	2.99144e-12
BIRC3	139.85	-2.20308	0.000188324
ZNF723	14.2142	-2.20166	0.0194
OLFM2	831.74	-2.1954	6.22127e-11
FGD5	910.346	-2.19533	4.47307e-13
MMP23B	30.8853	-2.19421	0.0041506
KCNQ4	25.9541	-2.19126	0.00268733
CNN1	133.292	-2.18654	3.41401e-08
CPXM2	513.972	-2.18319	6.21193e-14
NRG4	25.0832	-2.18208	0.0384733
AC008870.1	21.4083	-2.1805	0.00637719
VSX1	17.9241	-2.1783	0.00386239
LRRC2	80.4071	-2.17713	5.87376e-05
GCSAML	48.3582	-2.17532	2.24513e-05
EDA	1105.59	-2.17456	4.80688e-19
ITGAX	95.0595	-2.17196	5.60165e-08
DGCR5	38.856	-2.16916	0.00674038
CLEC11A	911.427	-2.168	2.74617e-11
SBDS	3028.1	-2.16622	3.80212e-21
FSD1L	77.1589	-2.16563	0.00256638
NUPR1	3967.9	-2.16464	1.35734e-07
ELMO1	320.92	-2.16274	0.00019251
ENTPD1	132.769	-2.16122	3.0793e-06
TNFSF15	89.4292	-2.15871	2.79381e-05
ENOSF1	316.796	-2.15506	8.28583e-06
GFOD1	600.161	-2.14645	1.21538e-07
IL6R	482.429	-2.14572	5.59395e-10
TNFRSF9	124.559	-2.14474	4.9009e-07
ARHGDIG	32.0683	-2.14377	0.0198729
DLX3	151.687	-2.14301	2.18861e-07
CYP7B1	22.8674	-2.14227	0.0371426
ARHGAP28	1386.03	-2.14129	4.62046e-08
PCAT19	74.5606	-2.13951	1.26728e-05
DDIT3	1280.59	-2.13605	3.15709e-10
KLF4	175.596	-2.13122	3.54425e-07
MYCL	127.603	-2.13033	6.48525e-07
WWC1	404.298	-2.12719	1.34569e-07
MFAP3L	44.4899	-2.12302	0.0320803
AL161772.1	117.02	-2.12238	5.96751e-08
SLC25A25	825.208	-2.11079	1.20613e-14
LINC01551	25.0168	-2.10199	0.0217546
OLIG2	13.3761	-2.10176	0.0354155
NA	117.163	-2.09006	3.84953e-06
SLC25A48	99.8352	-2.08918	0.00261129
RBBP8	785.05	-2.08822	1.39646e-05
LRRN2	417.809	-2.07953	5.19559e-07
TMEM37	644.702	-2.07704	1.47796e-07
VXN	66.7472	-2.07074	5.49524e-05
LGI3	23.5878	-2.07017	0.0208101
CTSS	601.732	-2.06732	3.03668e-11
GAL	31.8344	-2.06529	0.0126643
GRIN2C	33.1573	-2.06162	0.00207484
NA	97.2464	-2.0568	1.07722e-05
FXYD2	31.1377	-2.0507	0.0131088
AC091806.1	77.5589	-2.04461	1.15091e-06
SLC22A15	160.551	-2.04175	0.00111344
AC018413.1	36.2468	-2.04031	0.0180693
AC209154.1	41.1545	-2.03911	0.000206153
MEGF11	26.044	-2.03857	0.0368891
SLC7A2	1061.14	-2.0359	1.69127e-10
NA	130.302	-2.03552	0.000642067
SBDSP1	343.599	-2.02984	1.08238e-09
CERS1	530.166	-2.01293	9.95374e-10
ZNF711	190.077	-2.01039	0.00188459
HSBP1L1	238.735	-2.01008	4.70875e-18
C1QTNF5	801.42	-2.00952	3.73464e-08
ADRA1B	187.31	-2.00874	1.5472e-08
TLR3	452.033	-2.00691	4.60638e-08
NUP50-DT	100.413	-2.00537	1.59067e-05
IFRD1	2224.28	-2.00463	3.32748e-10
CECR2	358.267	-2.00385	2.4425e-11
ACHE	105.017	-1.99898	3.0459e-05
CEACAM19	76.1281	-1.99144	6.70451e-05
TMEM92	181.49	-1.9905	0.00221498
AC087203.3	32.0205	-1.99016	0.00152356
VPS13A	1477.36	-1.99004	0.0196456
TDRD10	44.2781	-1.9899	0.000654695
NA	54.1182	-1.98915	0.0174596
IQGAP2	1308.13	-1.98626	9.43283e-08
IL31RA	46.0301	-1.98613	0.000924472
SHE	208.195	-1.98374	9.29058e-09
ADD2	2043.22	-1.97879	1.01559e-15
MICE	27.5453	-1.97607	0.0188825
SLC16A7	164.025	-1.97302	0.00012314
SLC25A18	39.6653	-1.97027	0.00146803
CPA1	48.0902	-1.97019	0.017484
PITX1	237.422	-1.9688	1.38019e-05
SMIM10L2B	71.377	-1.96705	1.77686e-05
NA	39.126	-1.96366	0.0122601
CHAC1	565.993	-1.96201	0.000124647
STX7	1070.33	-1.95964	8.00953e-13
LINC01638	91.2499	-1.95871	2.92393e-05
KCNS1	182.545	-1.95659	2.5202e-07
ANKFN1	113.565	-1.95124	0.000241901
AC069120.1	32.3657	-1.95116	0.0232689
THAP9-AS1	444.985	-1.94308	7.2238e-08
TMEM64	552.216	-1.94134	1.66782e-07
PPARGC1B	331.461	-1.94004	3.67186e-10
HINT3	354.063	-1.93732	4.80285e-07
PLAT	16916	-1.93159	1.46391e-11
HOXD13	252.399	-1.93103	7.12846e-11
AUTS2	1100.85	-1.93049	1.68586e-09
GRAP2	95.5689	-1.92844	0.000875242
TCEA1	4469.49	-1.92385	1.53858e-16
BX088651.2	17.8421	-1.92334	0.0205585
ESRP1	135.819	-1.91906	4.03724e-07
GALNT9	91.8677	-1.91833	0.00121661
GPER1	124.26	-1.91672	0.000369923
MTHFD2	5589.11	-1.9167	1.84805e-14
RGS5	2365.59	-1.90958	0.000908613
NRARP	66.2307	-1.90278	0.000310325
APOL1	3924.77	-1.90013	6.14983e-15
CACNG4	217.645	-1.89621	5.89926e-05
NA	26.9085	-1.89604	0.0217704
SH2D5	193.712	-1.89451	2.99463e-07
BRCA2	157.19	-1.8912	0.0260237
AL353751.1	109.638	-1.89102	3.11312e-05
SPART	1833.61	-1.88787	9.41447e-11
PLIN5	38.5076	-1.88384	0.0234221
SERPING1	1247.33	-1.88249	2.22921e-10
KIF26A	165.8	-1.87914	6.25582e-05
GOLGA4	903.426	-1.87716	6.1638e-05
CTSV	471.037	-1.87668	1.67503e-11
MYO7A	137.824	-1.87504	0.00446286
LINC02387	72.26	-1.87467	0.00749863
LAMP3	196.895	-1.87062	1.10541e-10
PYGM	82.1899	-1.8694	9.36551e-05
GBP1P1	18.8073	-1.86641	0.0402243
DLL3	241.909	-1.86502	1.69919e-10
RPS6KA2	1029.52	-1.86286	7.26728e-19
APLNR	97.3415	-1.86247	0.00459976
SLC16A4	760.63	-1.8619	5.7449e-14
IQANK1	46.8904	-1.86122	0.00202622
LINGO1	112.569	-1.86029	0.000761202
AC026992.2	16.5564	-1.85658	0.0409176
GPNMB	4256.7	-1.85499	7.56002e-20
ATP8A1	141.149	-1.84697	0.00651466
ZIC5	51.3381	-1.84599	0.00324707
FHIT	37.6978	-1.84597	0.0118492
CEBPG	1152.95	-1.84437	5.65023e-07
TUBE1	352.303	-1.84176	1.7702e-08
RASL11B	54.302	-1.84153	0.0041506
ZNF596	81.0622	-1.84102	0.00767982
CA13	146.689	-1.84099	1.66879e-08
TRAF5	644.459	-1.82933	2.6107e-05
ADAT2	189.944	-1.82478	0.000890554
CARMIL2	76.1887	-1.81897	0.00957504
MAFF	385.129	-1.81585	7.62469e-11
MCC	3442.81	-1.81471	2.06088e-16
RNF6	460.402	-1.81366	7.86193e-06
SNCG	533.117	-1.81323	4.14093e-05
DLGAP1-AS2	178.081	-1.81222	1.81449e-07
SULT1A1	4720.04	-1.80974	8.14732e-06
ZNF354B	201.833	-1.80756	0.00240465
NXPH4	644.356	-1.8072	5.00387e-07
ALG13	989.31	-1.80622	0.0017409
AC125611.4	26.0539	-1.80035	0.030601
SOS1-IT1	31.2152	-1.79778	0.0231705
NFKBIB	605.334	-1.78942	2.35126e-10
ZFAND1	508.796	-1.78919	4.10946e-06
SLC25A30	786.971	-1.78284	9.03471e-08
POSTN	1153.36	-1.78194	8.09661e-05
FAS	134.149	-1.78154	0.000366321
ABO	124.951	-1.78073	0.00125971
FAM91A1	1878.54	-1.78053	8.28583e-06
ADGRG3	34.3201	-1.77757	0.00856032
PCOTH	20.5307	-1.77256	0.0207479
SLC19A3	155.214	-1.7699	0.000213961
CEACAM1	1356.56	-1.76848	3.0057e-09
TRIB3	6385.91	-1.76679	2.31725e-06
SGK3	208.977	-1.76443	6.16641e-06
COL14A1	338.733	-1.76194	2.07586e-07
SMC3	1024.27	-1.76142	3.69643e-05
SLC3A2	5929.53	-1.76012	5.226e-12
CHMP1B2P	56.9765	-1.75905	0.0156749
HSPB6	532.375	-1.75834	1.84751e-05
LIN28A	224.465	-1.75596	5.46559e-05
FAM184B	27.1262	-1.75546	0.0385041
CCDC183-AS1	217.612	-1.75411	1.47065e-07
DCST2	26.06	-1.75339	0.0327243
SLC25A32	858.087	-1.7523	1.06093e-11
MSX2	247.335	-1.75207	2.57102e-05
PLEKHG1	282.238	-1.75153	0.00191957
SLC6A9	614.24	-1.75	1.76753e-05
AC022167.2	174.505	-1.74911	1.51993e-06
KCNE3	58.8083	-1.74657	0.00496042
NRIP1	750.089	-1.73486	0.00603474
KBTBD11	121.593	-1.7323	0.00026626
ARRDC4	1365.01	-1.73158	1.43374e-11
NUDCD1	880.314	-1.72914	3.76204e-06
TMEM63C	327.543	-1.72684	2.73422e-07
GAS1	326.8	-1.72472	0.00288693
BMP2	154.974	-1.72001	2.64167e-05
CYP1A1	242.66	-1.71671	1.71305e-07
RNF165	118.7	-1.7111	0.000397117
CMPK2	71.7836	-1.71057	0.018375
NIPAL2	737.186	-1.70752	6.03575e-06
FHAD1	97.8395	-1.70743	1.5324e-06
BCL11A	60.7259	-1.7065	0.00609312
AC105450.1	41.6823	-1.70465	0.0031808
PCMTD1	675.975	-1.70378	1.05451e-05
DNAJB9	957.001	-1.70218	5.00355e-09
NIBAN1	1237.47	-1.70187	5.94828e-07
IL2RB	466.683	-1.70148	7.34988e-09
CYP11A1	166.638	-1.70136	1.14877e-05
TMPRSS3	41.8045	-1.70024	0.00748829
RND1	126.778	-1.69761	0.00221623
CLDN1	174.862	-1.69125	0.0062453
PCDHGB5	108.078	-1.69046	8.80218e-05
MS4A15	112.035	-1.6897	0.000257923
LRRC4B	655.937	-1.681	0.000301194
ADAM23	1347.3	-1.67683	1.2587e-16
LINC02610	34.2327	-1.67578	0.00524828
SLC39A14	4543.99	-1.6756	9.72233e-22
LYNX1	660.055	-1.67508	1.76753e-05
PCCA-DT	465.959	-1.67502	4.75394e-12
TCF15	86.2003	-1.66997	0.00177694
MAP7D2	509.887	-1.66956	3.11471e-09
AC107884.1	28.1876	-1.66611	0.0424529
AC079466.1	42.8788	-1.66598	0.00496799
KIRREL2	71.5585	-1.66319	0.000160423
AF131216.3	44.8791	-1.66113	0.0042387
DNASE1L2	63.1352	-1.66013	0.0287723
H2BC15	122.605	-1.65974	2.92452e-05
ARHGEF10	2091.2	-1.65812	3.00092e-09
SORL1	3282.74	-1.65805	6.31096e-11
TMEM140	1123.95	-1.65733	2.68163e-12
PPP1R12B	986.82	-1.6502	0.000278943
LAMC3	587.155	-1.6494	8.66149e-11
TRIM58	163.543	-1.64774	0.00357871
LINC02289	25.825	-1.64765	0.040508
AC121761.1	22.2172	-1.64484	0.0495342
FGFR4	276.794	-1.64425	9.34574e-05
REEP1	303.461	-1.64385	3.8799e-05
PRELID3A	82.0237	-1.64132	3.22007e-05
ASNS	6962.29	-1.64104	9.19057e-05
RBPMS2	318.379	-1.63997	1.30233e-06
CCPG1	1611.41	-1.63943	7.98296e-07
EIF4EBP1	4036.89	-1.63824	3.08988e-05
NBN	1034.47	-1.63766	5.79267e-05
HHLA1	57.9039	-1.62844	0.00415903
SLC6A1	28.8764	-1.62755	0.0108798
GARS1	10012.5	-1.62736	7.66369e-09
ZC3H12B	90.0397	-1.62703	0.000539914
PTHLH	142.302	-1.6252	0.000127969
PUM3	1022.85	-1.62495	6.98692e-05
AL590004.3	301.192	-1.6214	1.71227e-05
SLC8A3	646.563	-1.61932	1.14112e-06
LAIR1	104.253	-1.61874	0.000890554
RIMS3	571.256	-1.6186	0.000125202
EDA2R	69.0539	-1.61657	0.00158718
AC083862.2	115.696	-1.61192	6.72941e-07
PANK3	1725.51	-1.61156	6.8022e-05
N4BP3	86.3828	-1.61005	0.00394007
SRPX2	1205.12	-1.6095	4.62735e-06
ZFR2	252.36	-1.60776	8.8801e-05
SLC2A3	2525.29	-1.60741	3.37214e-15
XPOT	7157.3	-1.60629	1.06615e-05
NOC3L	964.814	-1.60417	9.01764e-07
TPD52L1	1644.91	-1.60116	1.33968e-12
DLGAP3	28.7858	-1.60075	0.0367949
NKD1	322.101	-1.59979	0.000180134
PPM1H	165.263	-1.59963	1.16136e-05
POTEF	136.891	-1.59777	0.00123719
DDR2	8460.8	-1.59723	6.18217e-08
TINCR	65.973	-1.59588	0.0238743
PALM	1510.13	-1.59554	2.53192e-08
AC116351.1	128.357	-1.59257	0.0013438
LINC01686	42.9681	-1.59203	0.0303467
ME1	408.917	-1.59152	6.4548e-06
LBH	692.223	-1.59008	5.34723e-07
FAM167A	251.226	-1.58886	2.42462e-07
OSGIN1	1249.17	-1.58651	0.000403384
SLC38A1	5356.07	-1.5857	2.44666e-06
SPDL1	419.152	-1.5845	3.99293e-05
LINC00189	134.095	-1.58358	3.03269e-07
SERPINA3	66.9812	-1.58238	0.00705451
PARP8	88.8578	-1.58058	0.0060376
LMO2	813.61	-1.57984	3.62963e-12
FBXL21P	688.5	-1.57821	0.00536909
CARD9	38.3538	-1.57795	0.00247907
ZFPM2-AS1	248.678	-1.57586	0.00119498
CNKSR1	58.0545	-1.57528	0.00680768
RFXAP	168.518	-1.57477	0.000159846
ALKBH8	391.532	-1.57423	0.00084959
MORC4	1512.88	-1.57321	5.11666e-12
LONRF2	255.229	-1.57271	0.000748198
GOLGA6L9	170.442	-1.56853	0.00256638
HLA-F-AS1	199.646	-1.56776	9.6412e-07
CHD7	1499.63	-1.5668	1.20785e-05
DYNC1I1	72.4321	-1.56678	0.0157814
U2AF1L5	1276.32	-1.56623	3.99285e-06
TP63	371.746	-1.56465	4.88968e-07
LGALS12	430.57	-1.56227	2.15017e-05
GAPDHP14	29.2437	-1.55937	0.025482
RRN3P3	186.825	-1.55917	2.15324e-06
NAMPTP1	143.308	-1.55904	0.00112836
YEATS2	2554.72	-1.55142	2.85775e-19
LINC00662	333.517	-1.55067	4.95325e-05
NAMPT	2975.27	-1.54875	5.7008e-05
LINC01694	114.146	-1.54838	0.00114436
ESRG	81.6327	-1.54763	0.000409945
C4A	2142.66	-1.5474	0.00278643
NAT2	25.7624	-1.54517	0.044702
ZNF234	497.898	-1.54415	3.08988e-05
ADGRG2	91.8123	-1.54356	0.0126106
SPRYD7	423.506	-1.54323	1.86489e-12
ANO4	53.6235	-1.5419	0.016435
JAG2	393.156	-1.54174	9.51118e-07
PNMA6A	378.449	-1.54167	6.52945e-07
SETDB2	368.926	-1.54035	0.00162317
ATP1B2	460.828	-1.53968	8.19311e-07
ST8SIA2	198.471	-1.53862	6.00375e-05
CXCL12	538.313	-1.5386	2.76861e-08
NMRAL2P	127.784	-1.53522	0.000248025
CRACD	113.246	-1.53468	0.0258541
FOXF2	225.7	-1.53205	1.34547e-08
PIK3C2A	1994.12	-1.52558	0.00393066
AC125807.2	586.272	-1.52557	1.08279e-07
AC027237.5	34.1479	-1.52532	0.0319394
RASGRP3	90.4542	-1.52462	4.28251e-05
CHMP4C	88.3622	-1.52382	0.000586073
LIFR	11801.4	-1.52155	0.00230955
AC016831.1	48.3554	-1.52083	0.0188097
AL365181.2	57.6553	-1.52002	0.00320621
COL15A1	16691.5	-1.52002	1.95158e-07
UFM1	845.358	-1.51951	1.32128e-07
RASL12	178.303	-1.51811	0.000217676
XPNPEP3	776.598	-1.51736	1.28248e-05
EDNRB	705.343	-1.51617	1.40363e-07
ZBTB10	839.7	-1.51589	3.26731e-05
ZDHHC11B	37.4022	-1.51533	0.0178969
RPP25	978.819	-1.51216	1.36343e-06
MYLK3	151.168	-1.51123	7.80758e-05
AC008555.2	41.0078	-1.51078	0.0226987
MYCBP2	4487	-1.50786	9.25882e-05
VEGFA	2890.66	-1.50746	2.01973e-07
AKAP5	151.781	-1.50628	0.00830322
CEP83	159.504	-1.50392	0.000672641
FGF1	151.827	-1.50358	0.00142292
MAP3K2	897.569	-1.50123	0.0100599
ANKRD18A	84.0239	-1.50098	0.0321745
SHMT2	9387.1	-1.49922	0.00033707
SDS	52.0686	-1.49898	0.0352812
AL137003.1	325.21	-1.49736	0.00551349
CASKIN1	108.014	-1.49457	0.0124985
AC007405.4	60.0931	-1.49204	0.000750048
TSPAN7	81.6905	-1.49196	0.00307894
RORA	229.296	-1.49195	0.000376227
PPP1R3B	1284.58	-1.49194	1.3508e-12
TNFRSF12A	1104.55	-1.48976	0.00163159
FAR2P1	307.084	-1.48142	0.0111468
RADIL	76.8676	-1.48048	0.0102441
RSPO4	338.961	-1.47957	7.26801e-08
AC087477.2	63.3018	-1.47918	0.0199325
PPP1R15A	1547.16	-1.47877	7.23088e-11
PRMT3	827.194	-1.47744	1.55025e-05
TLCD4	285.84	-1.47436	0.00835934
MTDH	3774.79	-1.47375	1.03572e-07
SRSF12	51.1701	-1.47292	0.0112599
MROH8	106.536	-1.47204	0.00252081
FLT1	554.13	-1.47078	3.68267e-08
SH3BGR	66.0827	-1.46942	0.00722332
MPHOSPH8	942.899	-1.46862	2.93226e-08
GRPEL2	605.575	-1.4683	1.88691e-05
DTNA	221.637	-1.46445	0.000195172
CLTB	1357.41	-1.45926	2.89352e-05
AGFG2	2415.42	-1.45846	0.000515297
PHF20L1	1207.43	-1.45801	0.00182521
ERN1	875.041	-1.45736	4.4899e-06
CHST3	728.999	-1.45694	1.80369e-06
CYP2S1	1395.72	-1.45462	4.23961e-05
KANK1	2708.54	-1.45456	2.30311e-08
PTPRU	915.554	-1.45043	1.53672e-09
IL6ST	17688	-1.44914	0.00383483
ZBED3-AS1	362.082	-1.44845	0.000328271
VSTM2L	292.505	-1.4483	0.0418207
B4GALT6	373.86	-1.4482	0.000303104
HOMER1	570.691	-1.44801	0.00134074
SLC9A3	168.685	-1.44765	0.000693077
SOX7	43.4562	-1.44581	0.0248022
GPRC5B	1046.03	-1.44549	1.6996e-07
ZIC2	260.044	-1.44515	0.000130691
ATXN1-AS1	137.338	-1.4443	0.0130111
NLRP12	69.6274	-1.4387	0.000931459
PLXNC1	200.07	-1.43788	0.0218443
PTGIS	1011.14	-1.43554	1.66976e-09
NA	46.8996	-1.43409	0.023672
CT45A1	261.41	-1.43368	2.67161e-06
PROSER1	1071	-1.43274	3.63277e-09
ABCA5	409.752	-1.43234	0.0312201
RBM26-AS1	74.717	-1.43178	0.00492112
AC006504.1	41.3503	-1.43031	0.0262749
SSTR2	109.914	-1.42838	0.00573937
CELF5	48.1861	-1.42821	0.0465366
ZDBF2	648.493	-1.42699	0.0153593
PVT1	202.265	-1.42596	0.00241329
SLC7A1	2848.22	-1.42559	4.31168e-09
CD6	118.404	-1.42491	0.000241075
ZNF704	1681.63	-1.42479	1.07873e-06
KCNG1	713.842	-1.4201	4.94646e-05
FLNC	13945.4	-1.41992	6.5571e-08
PLEKHF2	457.69	-1.41848	0.000180451
CACNA1B	67.8615	-1.41696	0.00449959
TUB	3347.48	-1.41377	7.11237e-19
WARS1	11983.4	-1.41367	8.73855e-05
CCT6B	81.4486	-1.41209	0.000360616
RHOU	220.913	-1.41067	0.000284632
VPS9D1-AS1	278.467	-1.40945	1.73779e-05
ANKRD18B	106.656	-1.40887	0.00778456
CYP39A1	265.278	-1.40851	0.000288202
SSR3	4239.41	-1.40758	4.21351e-10
AC012618.3	81.3694	-1.40562	0.0147707
IPMK	138.43	-1.4052	0.00811112
KAZN	1327.24	-1.40389	2.88989e-10
WWP1	916.878	-1.40328	0.000357491
BCAT1	1538.67	-1.40201	7.92979e-08
CLSTN2	352.283	-1.39337	0.00139643
OBI1	592.431	-1.393	0.00435106
CALD1	9507.68	-1.39104	4.28261e-05
UBAP1L	114.096	-1.39035	0.00384456
CCDC138	229.915	-1.38899	0.00135774
WRN	865.641	-1.38867	0.000601082
BCL6	680.622	-1.38601	1.5086e-13
IARS1	13328.8	-1.38302	6.57837e-06
ARL5B	408.818	-1.38227	0.0154981
TLE3	1013.28	-1.38218	2.94615e-05
IGFL2-AS1	64.6337	-1.38107	0.0349488
AIF1L	1010.99	-1.38039	1.90275e-06
BOD1	1569.58	-1.37987	5.14861e-14
LONRF1	381.059	-1.37847	0.000223117
APCDD1L	394.883	-1.3767	0.00083081
SH3BP5	1342.82	-1.37477	3.415e-07
NYAP1	179.94	-1.37365	0.000283796
NA	207.802	-1.37313	0.0135436
MIA2	788.998	-1.37105	2.34891e-07
INTU	324.514	-1.37071	0.000459633
HSPA13	1462.67	-1.36931	0.00139635
TNFAIP3	390.196	-1.36921	6.45601e-06
AGAP2	165.254	-1.36861	0.000486564
ZNF252P	1043.66	-1.36743	3.54493e-06
WWC2	1347.48	-1.36543	7.48199e-06
APOL4	121.907	-1.36464	0.00370967
C4orf46	368.382	-1.36431	5.12957e-05
ZNF770	741.846	-1.36329	0.0052918
SGTB	708.095	-1.36202	8.20977e-09
NLRP3	89.3382	-1.36143	0.00203666
CLIP4	1069.34	-1.36096	6.45601e-06
OTUD6B	235.544	-1.36069	0.00567396
AC011481.3	57.2428	-1.36028	0.00638095
BCL2	161.413	-1.3557	0.000146847
MBNL2	3101.67	-1.35482	0.000956208
NDUFA4L2	113.819	-1.35375	0.023147
MTMR8	63.4028	-1.35179	0.0471639
MLXIPL	226.976	-1.34796	7.67738e-07
PCK2	3700.44	-1.34786	0.00028365
COL26A1	368.117	-1.34751	0.0105747
USP25	842.155	-1.34462	8.66703e-05
NR4A1	291.914	-1.34418	4.18991e-06
DNAH14	176.775	-1.34089	0.000387283
ZNF257	75.3337	-1.34025	0.0417858
LACTB2	401.358	-1.33968	5.66848e-07
ABCC4	4666.1	-1.33747	9.05552e-05
ZCWPW1	153.881	-1.33681	0.000642067
HOXA1	336.266	-1.33495	1.5324e-06
ZNF566	209.765	-1.33353	0.0106044
KCNB1	54.5827	-1.32838	0.0301653
LHFPL6	459.088	-1.32832	0.00533314
GPT2	2582.03	-1.32722	5.51396e-07
ESM1	77.2424	-1.32721	0.030601
MICU3	76.7894	-1.32719	0.00402502
GRB10	3289.82	-1.32052	2.10621e-10
NHLRC3	414.769	-1.31986	0.00107991
TMEM191C	75.2461	-1.31919	0.014178
PDCD1LG2	69.1736	-1.31828	0.0213671
EMILIN3	178.463	-1.31827	0.0461248
OSBPL6	428.405	-1.31769	1.13896e-07
ZNF23	324.774	-1.31748	0.0209202
G0S2	1885.11	-1.31711	3.23058e-06
TRAM1	3903.59	-1.3158	1.70822e-05
FBXO10	1236.24	-1.31543	8.14792e-10
AC097532.2	171.585	-1.31541	0.00084959
ZCCHC8	685.867	-1.31499	2.14341e-05
FAM215B	49.8299	-1.31445	0.0255012
RENBP	344.892	-1.31425	1.96094e-05
RCAN1	2110.64	-1.3119	4.98854e-11
ITPR1	945.189	-1.31106	9.83383e-06
IL2RG	99.3642	-1.31	0.0239134
ATP6V1C1	1097.22	-1.30848	0.000634204
TEAD4	1013.74	-1.30829	0.000175488
EIF3C	39142.3	-1.30804	4.4366e-06
GRASP	182.96	-1.30508	0.00387693
PHF21B	63.5507	-1.30456	0.0375401
PTGS1	3176.38	-1.30403	0.0118628
FAM89A	582.458	-1.30355	1.51137e-07
SHLD2	565.262	-1.30353	0.00524676
DNAJC10	2469.05	-1.30343	0.000848874
SLC2A4	454.42	-1.30337	1.79957e-05
TNFRSF1B	656.535	-1.30299	0.000159846
CHRNE	50.4236	-1.30235	0.0444665
MINDY4	810.923	-1.30195	5.71331e-05
SYDE2	154.286	-1.29967	0.0129432
CRNDE	345.613	-1.29936	0.00239969
SPTBN2	1384.72	-1.2991	1.37239e-06
TLN2	1516.78	-1.29876	3.04565e-08
TMCC3	233.048	-1.29795	0.000205638
AC092111.1	109.999	-1.2963	0.000580121
APOL6	2653.29	-1.29526	1.3587e-10
LRRC58	1241.64	-1.29489	0.0102322
MYH14	1628.14	-1.29483	0.000366321
RIF1	885.934	-1.29375	0.0459351
EXOSC8	617.92	-1.29296	8.61597e-07
HLA-F	932.716	-1.29292	0.000568766
HSPA9	18173.1	-1.29048	1.59704e-08
ZNF26	440.973	-1.28957	0.00322769
MTFR2	142.427	-1.28909	0.00128444
EPHX1	4268.91	-1.28879	0.00368525
METTL4	251.102	-1.28816	0.0302553
FRMD4B	134.936	-1.28761	0.00541376
VPS36	644.656	-1.2856	0.00529329
BACH1	1392.17	-1.28489	0.00109908
PNPLA7	140.954	-1.28409	0.000243105
FOXN2	364.684	-1.28387	0.00144593
AP001528.1	68.0716	-1.28246	0.0265003
ABCG2	290.41	-1.28056	0.00952941
PPM1K	674.508	-1.28036	0.000751328
SLC8A2	71.4301	-1.28031	0.0361401
SESN2	1370.02	-1.27928	0.000452379
IRX5	68.5422	-1.27813	0.0459351
MAK16	1709.4	-1.27757	5.78364e-07
USP31	554.184	-1.27713	2.49969e-12
GNAL	375.111	-1.27658	3.57113e-05
PTPDC1	407.413	-1.27653	0.00182521
SLC1A5	10261.9	-1.27646	5.2482e-06
FAM215A	41.5042	-1.27455	0.0342918
KIF6	125.84	-1.27337	0.00304717
LIN54	448.587	-1.27314	0.000257119
MYBL1	164.282	-1.27259	0.00731082
LTN1	1149.71	-1.27111	0.0254394
OPA1	1184.76	-1.27042	0.00783983
CPEB1	381.103	-1.27037	0.00020763
CDK8	590.319	-1.27021	4.36021e-07
ZNF185	2049.84	-1.26813	0.000376227
AC020904.2	45.6958	-1.26772	0.0490463
BHMT2	407.932	-1.26607	5.11341e-05
NPIPB12	215.406	-1.26526	0.00201926
ETS2	1088.48	-1.26524	1.87228e-10
TMEM38B	481.154	-1.26491	0.000142813
LYPD8	82.9248	-1.26446	0.00859613
UBLCP1	1399.62	-1.26224	0.000363157
SMG1P2	76.3801	-1.26057	0.00721828
PAQR5	338.671	-1.2591	1.23539e-05
SMCO4	126.561	-1.2575	0.0232465
SLC5A3	5528.33	-1.25724	0.00662954
SYNE1	1063.22	-1.2571	0.000761202
RCHY1	572.941	-1.25621	4.13587e-06
QKI	3704.45	-1.25473	5.953e-07
SLC39A10	1023.35	-1.25445	0.0166438
MRPS31P4	62.6812	-1.25371	0.0269377
USP2-AS1	102.081	-1.25244	0.00548539
FANCM	153.908	-1.252	0.0168083
BNC2	545.985	-1.24835	0.00199838
VPS13C	1864.79	-1.24761	0.0379454
ZNF12	1200.28	-1.24645	0.00394007
CNTNAP3	320.914	-1.24594	0.0200849
RBAK	551.682	-1.24526	0.0110777
IL1RAP	441.344	-1.24515	5.25146e-05
CDC37L1	364.205	-1.24264	0.00967683
WWOX	469.534	-1.24094	3.12767e-05
PMAIP1	485.467	-1.23958	0.0105747
CDH13	6898.93	-1.23822	1.38742e-08
ADAMTSL3	65.7251	-1.23754	0.0420841
PLEKHA8P1	141.085	-1.23754	0.0023999
ZRANB2	2112.97	-1.2344	0.00252081
FIGN	292.46	-1.23317	0.0252748
CADPS	406.168	-1.23314	0.000947651
ANO6	3704.12	-1.23072	1.88117e-07
LATS2	832.141	-1.23033	1.64804e-10
GLB1L	3053.34	-1.23015	1.64697e-09
NA	146.07	-1.23001	0.00198675
ENTPD1-AS1	158.71	-1.22835	0.00872071
ALG11	428.784	-1.22738	0.000131697
NEXN	182.288	-1.22733	0.0215937
AC243964.4	177.841	-1.22729	6.94805e-05
TSTD2	1544.23	-1.22577	6.98497e-11
GLI1	79.6669	-1.22573	0.0405352
CDK18	1145.56	-1.22443	5.75897e-06
IL32	191.01	-1.22403	0.00718813
UHRF1BP1L	606.186	-1.22208	0.000663838
PCM1	2315.76	-1.219	0.0216177
PHIP	642.316	-1.21772	0.0465366
ZNF354C	379.209	-1.21745	0.0321301
CHORDC1	810.637	-1.21672	0.00415903
KLHL7-DT	145.942	-1.21633	0.0202358
ATP6V1FNB	64.4382	-1.21404	0.0481751
NFAT5	5180.94	-1.21233	0.00311712
SNAI2	647.449	-1.21134	1.39681e-08
SMG1P3	221.509	-1.21078	0.00107588
NLGN3	86.2156	-1.20969	0.00788599
AC138393.1	73.0346	-1.20835	0.0196647
FUOM	494.092	-1.2074	0.00124349
AF117829.1	107.615	-1.20724	0.0144555
CLINT1	7257.91	-1.20597	1.87687e-05
PALB2	641.797	-1.20545	0.00687851
KDM7A	312.549	-1.20448	0.038575
PTDSS1	3433.83	-1.20365	5.97624e-06
PARD6B	156.321	-1.20283	0.00627243
ZEB2	735.638	-1.20208	0.00116755
MMP17	129.895	-1.20201	0.0277923
COX19	441.145	-1.20064	1.12127e-07
SMIM10L2A	156.829	-1.20049	0.000338156
AC005747.1	1584.85	-1.20043	0.00057377
NRTN	52.1404	-1.20029	0.0464807
NUAK1	983.88	-1.19852	1.76166e-07
KLHL29	744.162	-1.19828	4.5851e-09
KCNJ12	227.437	-1.19798	0.000963119
TRPM7	941.664	-1.19798	0.0225438
ZNF280A	138.926	-1.19783	0.0011063
AC017100.1	67.9264	-1.19765	0.0158196
CHN2	217.446	-1.19705	0.00967683
CDR2	892.606	-1.19593	1.57823e-08
PRR5	845.093	-1.19505	0.000576942
AFDN	1962.72	-1.19439	0.000886711
C11orf96	95.5367	-1.19373	0.00388436
TAF4B	340.862	-1.19288	0.0010827
ZNF354A	231.184	-1.19134	0.0307419
SYNPO	1976.1	-1.19012	0.0105497
NARS1	5932.07	-1.18943	0.000415145
NKX3-1	1271.4	-1.18875	0.0019166
ATXN2L	6566.03	-1.18836	2.4694e-07
SLC35F6	2356.32	-1.18711	1.67383e-06
RB1	3788.03	-1.18687	0.00148725
MTBP	233.039	-1.18628	0.0170754
RNF122	248.945	-1.18586	0.00324707
VSIR	741.998	-1.18471	0.00313421
N4BP2L2	845.054	-1.18418	0.0436568
DENND4C	1464.77	-1.18279	0.00390172
LY6E-DT	106.991	-1.18279	0.00339365
AL109918.1	682.712	-1.18166	0.0017567
HSPA12A	390.598	-1.18142	6.59284e-05
LINC01239	55.3526	-1.18051	0.0167294
SMOX	1750.33	-1.18044	1.42026e-07
ECHDC1	723.602	-1.18017	0.000900838
PMM2	1588.72	-1.17959	1.15247e-05
AC023794.2	46.1423	-1.17893	0.0314273
OSTM1	795.674	-1.17875	0.000576657
FAM92A	563.072	-1.17652	0.000303411
CSPP1	356.894	-1.17649	0.000696063
SLC1A4	1283.33	-1.17326	0.000280806
SOS1	1860.94	-1.17286	0.00861476
FOXD2-AS1	256.395	-1.1699	0.000154548
STOM	6287.95	-1.16914	1.30715e-09
AGPAT5	1223.26	-1.16869	0.000151766
PVR	3084.66	-1.1676	2.13639e-06
SHANK3	460.679	-1.16715	0.000174431
BEND4	201.097	-1.16625	0.0468328
IRX3	705.068	-1.16603	0.00281047
CSMD1	152.735	-1.16593	0.012978
DMGDH	217.504	-1.16552	0.00250982
CDC42EP1	3448.77	-1.16428	0.000624722
CEBPZ	1128.29	-1.16341	0.038413
NCOR1P1	197.248	-1.1611	0.000624001
MDFI	2336.68	-1.16055	0.000200561
HLA-B	14801.5	-1.16054	0.00109744
CENPJ	210.52	-1.15981	0.0421481
RALA	3000.16	-1.15866	9.83772e-07
LAPTM4B	13194.1	-1.15813	2.98345e-17
SLAMF7	59.7003	-1.15763	0.017203
DDX21	3761.82	-1.15747	6.80898e-05
UTP23	626.739	-1.15669	0.00175206
HKDC1	79.0092	-1.15651	0.00526996
HSPH1	3310.97	-1.15524	2.81237e-05
ZFP69B	191.812	-1.15485	0.0348101
IMMP2L	264.908	-1.15462	0.00142542
MEIS3P2	152.688	-1.15406	0.00205974
TMEM192	1249.27	-1.1505	1.85325e-07
CD164	5020.49	-1.15035	0.000604973
NFIL3	578.836	-1.14957	1.66106e-07
AL139002.1	137.944	-1.1494	0.00282381
ZNF391	426.148	-1.14884	0.000329551
TRMT13	463.306	-1.14844	0.0436065
TNRC6C-AS1	971.811	-1.14837	1.19913e-08
ZNF613	152.054	-1.14819	0.00917399
KRCC1	328.433	-1.14777	0.028417
TMEM65	697.588	-1.14724	0.00680406
SLC19A2	310.131	-1.14704	0.000375859
FKTN	1143.44	-1.14499	0.00538674
DNAJB5	1132.66	-1.14353	0.00139836
CANX	17658.7	-1.14324	5.00834e-06
ZNF468	892.121	-1.14279	0.00262269
UGGT2	1565.24	-1.14217	0.0398825
FNIP1	1874.24	-1.14183	0.00476898
UBE2J1	2007.85	-1.14135	2.04033e-07
ACSL1	544.794	-1.1413	1.99223e-08
LINC02609	109.78	-1.14088	0.00483549
CCDC88A	1404.44	-1.1406	0.0283904
ICAM1	10930.6	-1.14055	8.27207e-07
PIM1	592.38	-1.13793	4.23603e-05
DAB2IP	3573.99	-1.13673	6.86374e-06
RRN3	1929.18	-1.1356	1.00417e-05
CYP4V2	266.292	-1.13444	0.00386239
PLS3	6935.98	-1.1319	4.12573e-05
SLC39A8	337.188	-1.13164	0.000241075
SP6	106.885	-1.13108	0.0260954
TMEM68	368.675	-1.13074	0.000708474
NA	203.549	-1.13071	0.00189557
EIF2S2	6421.18	-1.13057	0.000888301
CACNA1A	208.852	-1.13013	0.00318725
DNAJC2	606.954	-1.13013	0.0249971
H2BC18	255.396	-1.12929	4.11508e-06
DCAF13	1574.12	-1.12859	0.0121441
NOTCH1	729.347	-1.12834	4.60434e-05
ZNF331	345.113	-1.12753	0.00618446
GFPT2	383.332	-1.12532	0.000732893
C12orf66	261.565	-1.12531	5.65969e-05
SLC16A1-AS1	204.54	-1.12525	0.00313822
RPL22L1	1095.05	-1.12502	4.89896e-08
MIOS	686.709	-1.1244	0.00948867
AGTPBP1	479.905	-1.12393	0.0119713
DIAPH2	395.485	-1.12313	7.29347e-05
KIF27	129.655	-1.12302	0.0286244
WHAMMP3	118.185	-1.12125	0.0215595
UFL1	617.885	-1.12059	0.0315657
LONP1	4386.29	-1.12045	0.000435785
MAP1LC3B	4631.94	-1.11973	2.78594e-10
DENND4A	842.006	-1.1196	0.0123911
CLIP1	1643.41	-1.11953	0.000739874
PAPLN	1065.33	-1.11895	0.000291803
WTIP	835.82	-1.11681	0.00706729
TNFRSF10B	4287.7	-1.11638	6.53624e-11
NAPEPLD	411.637	-1.11595	0.0139698
TGDS	669.344	-1.11586	0.000380099
DIS3	2521.15	-1.11548	0.0250593
CTSK	82.3849	-1.11437	0.0358513
AGO2	1932.07	-1.11348	2.59022e-09
AL031985.3	163.085	-1.11288	0.0155156
AC023824.6	70.4666	-1.11263	0.0104396
CHM	730.773	-1.11255	0.0287723
L3HYPDH	496.797	-1.11204	0.00329661
VPS37A	838.447	-1.11124	3.8799e-05
EIF4EBP3	130.399	-1.1109	0.0239966
ZC3HAV1L	333.907	-1.10903	0.00400753
ZC3H15	1016.13	-1.10884	0.0238803
RPF2	774.522	-1.10735	0.00182267
ITGB3	1006.78	-1.10725	0.000623701
ZNF879	85.4378	-1.10693	0.0215218
PRR22	73.7312	-1.10671	0.0207967
E2F8	290.655	-1.10655	0.0261264
PPP1R15B	2107.22	-1.10446	1.63719e-09
WFDC1	111.059	-1.10386	0.0351943
GIMAP2	510.229	-1.10366	0.00550895
ZFAND2A	367	-1.10295	4.41503e-05
FEZ1	952.26	-1.10234	0.00186448
NPTXR	1869.32	-1.10166	3.08989e-05
SPSB4	164.375	-1.10148	0.00562859
MMP11	939.997	-1.10116	0.000142704
DAPK1	2067.13	-1.1007	7.85424e-06
TBC1D31	298.565	-1.10043	0.00147399
DDIT4	4598.97	-1.10017	0.00312081
SCLT1	242.95	-1.10003	0.00173099
YTHDF3	3022.71	-1.09965	8.52114e-06
PAXIP1-AS2	535.161	-1.09954	0.000243105
RFK	598.431	-1.09911	0.000370379
ADAP1	246.78	-1.09888	0.00305206
IMPA1	395.325	-1.09664	0.0201876
ITIH5	85.4475	-1.09597	0.0349937
E2F5	323.145	-1.09423	9.88102e-05
ADAMTSL1	94.6441	-1.09287	0.0274315
NIFK	1112.36	-1.09267	7.82858e-05
JMJD1C	713.069	-1.09193	0.0237708
SAMD9L	547.331	-1.09119	0.046527
SYNE2	1275.73	-1.09057	0.00546882
SLC25A36	1599.61	-1.09052	0.0427563
U2SURP	1716.63	-1.08746	0.0341118
CLCN3	2113.56	-1.08742	0.00378371
NOL6	5588.21	-1.08719	6.38199e-05
HLX	1332.82	-1.08546	0.000199022
RAD50	2236.22	-1.08455	0.0132595
WHAMMP2	88.7217	-1.08435	0.0434653
RFX3	279.427	-1.08422	0.00409787
STON1	802.506	-1.08421	0.00421175
THUMPD1	1309.01	-1.0839	0.00811112
ZNF850	209.864	-1.08375	0.0347128
DNAJC3	4888.26	-1.08335	0.00014919
ZNF503-AS1	178.537	-1.0833	0.00603474
HAUS6	1012.08	-1.08138	0.0273363
FAM102A	1630.37	-1.08047	0.000273514
PDGFRB	9170.63	-1.08014	0.000227401
MMRN2	221.604	-1.07936	0.00122069
OR10H5	84.9487	-1.0793	0.0465366
CDKN2B-AS1	92.729	-1.07848	0.0296496
HAP1	252.994	-1.07744	0.000641862
SAMD11	394.532	-1.07712	0.00562859
PPM1E	235.147	-1.07662	0.00214346
ADAM9	5099.48	-1.07552	0.00677895
LHX8	287.367	-1.07364	0.00231816
PSMG1	1252.75	-1.0735	4.19798e-06
DSCC1	231.335	-1.07227	0.0124994
JPH2	489.545	-1.07081	0.029846
APOL2	1747.16	-1.06997	1.71745e-08
PTAR1	1183.43	-1.0699	0.0402819
ORC5	928.234	-1.06909	2.04779e-06
AC067750.1	111.073	-1.06904	0.0235759
ZHX1	1239.76	-1.069	0.0328261
PPP1R26-AS1	63.6321	-1.06891	0.0323589
HEYL	79.5091	-1.06769	0.0378555
NINJ2	83.5113	-1.0676	0.047129
EPRS1	5181.23	-1.06696	0.000755253
BCLAF1	2344.37	-1.06427	0.0355531
DPYSL5	1022.72	-1.06343	0.00899042
NOCT	176.467	-1.06275	0.00240465
ABCC6P1	120.826	-1.06247	0.0437131
BNIP2	1498.54	-1.06136	0.0149154
GPR146	124.14	-1.06122	0.0180185
CEP120	655.497	-1.05928	0.0356052
MFHAS1	859.553	-1.05917	2.36688e-05
SPHK1	654.846	-1.05906	0.000542956
PRAP1	179.571	-1.05797	0.0166575
HOTAIR	130.624	-1.05786	0.00491072
NT5E	1633.68	-1.05738	0.000540296
NR1D2	1600.45	-1.05688	0.0120233
ZNF239	254.396	-1.0562	2.07991e-05
SCOC	682.669	-1.05612	0.0351943
PTP4A3	370.447	-1.05575	0.0103752
AC141586.1	313.156	-1.05475	0.000911898
CYS1	67.9139	-1.05434	0.0231665
TIGD7	589.218	-1.05248	0.0239526
GGCT	771.772	-1.05087	0.0026118
ECHDC2	102.409	-1.05084	0.0237835
OSGIN2	427.015	-1.05052	0.00189557
ASAH1	2469.97	-1.05029	1.03283e-06
SALL1	911.163	-1.04986	1.02629e-05
TNFSF10	741.135	-1.04896	0.000610062
KCNC3	166.383	-1.04856	0.00483549
CFAP97	1117.61	-1.04854	0.0158216
ATP6V1H	1478.58	-1.04841	1.41166e-06
TIAM1	1833.59	-1.04737	0.00175206
UHRF1BP1	4685.08	-1.0458	3.2961e-07
WASHC4	1001.39	-1.0457	0.0471654
AF279873.3	212.414	-1.04467	0.00307108
ADAM11	419.427	-1.04409	0.00250982
ZNF337-AS1	201.224	-1.04392	0.00312438
FNIP2	801.706	-1.04355	0.00530668
LYN	569.353	-1.04315	2.65476e-07
LARP4	1459.92	-1.04284	0.00952092
IFIT3	980.62	-1.04281	0.00123879
SUSD1	1177.64	-1.0426	2.01973e-07
EFR3A	1957.7	-1.04259	0.00171669
INTS8	1436.07	-1.04126	0.000227394
BET1	803.567	-1.04103	0.00907694
PDE9A	420.761	-1.03809	0.00288434
NSD3	2376.09	-1.03771	0.000319505
YTHDC2	1427.54	-1.03698	0.015475
CARD10	954.059	-1.03673	0.0123509
AC102953.2	445.868	-1.03572	1.74946e-05
NOD2	137.482	-1.035	0.0178397
DCAF10	1264.43	-1.03386	0.000645217
MRE11	1004.79	-1.03355	0.00590254
ATP6V1B2	4141.25	-1.03309	1.19694e-05
KCNK5	458.58	-1.03209	0.0101102
SRRM3	366.165	-1.03195	0.0156367
IGLON5	605.638	-1.03173	0.00528803
ATP11A	1484.68	-1.03153	0.000765763
SNX16	238.296	-1.02967	0.0117076
MASP1	56.6148	-1.02928	0.0492769
USP48	1970.41	-1.029	0.00417594
NA	119.267	-1.02885	0.0214576
AARS1	17487.8	-1.02651	0.00177157
RNF41	3034.46	-1.02634	0.00264287
HYAL1	231.557	-1.02551	0.00198551
AL353743.1	71.6297	-1.02543	0.0451953
RSL1D1	5523.45	-1.02381	1.19918e-05
GLS	2086.13	-1.0238	0.0418207
PTPN11	4961.99	-1.02308	0.0077195
IFIT2	1126.67	-1.02288	0.012066
FAM230C	136.276	-1.02264	0.00610364
KATNB1	1222.59	-1.02211	0.00032442
CPEB4	399.139	-1.0215	0.0232461
PHACTR2	570.98	-1.02149	0.0286718
WHAMM	510.23	-1.02047	0.000276984
TESC	85.2324	-1.01994	0.0450686
GFM1	1522.58	-1.01962	0.000134031
EPHX2	855.902	-1.01955	0.00031606
NUP58	977.366	-1.01628	0.00257214
PTER	351.359	-1.01618	0.0320029
RNF138	656.622	-1.01617	0.0233106
CTNS	1624.33	-1.01514	0.000134445
EEF1E1	409.161	-1.01459	0.00161101
VCPIP1	725.113	-1.01446	0.00975402
P4HA1	1751.35	-1.0144	0.00185375
ZNF550	562.348	-1.01405	0.0139025
FAM27E3	333.097	-1.01398	0.00679477
RFESD	179.726	-1.0135	0.0201613
RRS1	1254.89	-1.01178	0.000102222
IL3RA	127.624	-1.01161	0.0163898
FUT10	435.437	-1.01151	2.13648e-05
GSR	3507.55	-1.01026	0.000295831
ZNF644	669.993	-1.01	0.0365546
MAPK6	1636.35	-1.00957	0.005658
SNHG17	1150.78	-1.00914	0.000532175
TMEM70	628.806	-1.00851	1.93431e-07
ZNF563	80.5024	-1.00809	0.043367
USP16	662.137	-1.00756	0.0251531
RBM34	813.466	-1.00626	0.00496893
REM1	387.704	-1.00592	0.012659
RPL7	24151.3	-1.00549	0.000431001
ZC2HC1A	134.869	-1.00429	0.0358072
B3GNT10	185.018	-1.00417	0.00187745
PIP4P2	557.733	-1.00399	0.000107989
HOTAIRM1	565.817	-1.00346	0.00339365
BCOR	2324.48	-1.00315	2.7036e-06
TMOD2	615.761	-1.00197	0.0397474
REST	1222.29	-1.00181	0.0246238
C4B	3687.51	-1.00181	0.0400123
FAM49B	1825.09	-1.00175	8.85461e-05
ERI2	357.317	-1.00165	0.0252465
DESI2	1669.44	-1.00127	0.000478364
NA	89.0361	-1.0012	0.0128769
GPR180	1047.4	-1.00111	0.0238745
POLR3E	1721.87	-1.00064	2.5903e-05
ZNF525	172.801	-1.00056	0.0345311
YES1	1569.71	-0.99921	0.0216424
FAM135A	298.216	-0.998607	0.0284117
SNHG8	1060.88	-0.99849	0.00198639
RAPGEF4	1112.34	-0.997562	0.00234443
GLI2	569.513	-0.997204	0.00637244
NFIA	832.399	-0.995536	0.00060965
ULBP3	86.2291	-0.994319	0.0244454
NCR3LG1	1098.02	-0.993859	4.47597e-06
LRG1	241.651	-0.99358	0.0140079
FAR2P2	234.903	-0.993406	0.0213733
ZNF146	1212.73	-0.99167	0.0321568
CITED4	173.796	-0.991342	0.0155156
SNHG15	766.521	-0.99105	0.000378509
NSMAF	1541.8	-0.990539	1.25234e-07
AC008443.3	118.586	-0.990495	0.0287723
CLN8	851.901	-0.989403	5.41023e-07
LINC02055	68.1927	-0.989242	0.0396215
TMEM138	1477.87	-0.989241	0.00054898
SMG1P7	152.769	-0.989239	0.0252144
PGM3	1452.4	-0.98817	0.000966098
LINC02861	89.6336	-0.988126	0.0404515
ZNF473	757.366	-0.987871	5.12957e-05
LINC02593	310.428	-0.987318	0.00171391
HOXC13-AS	69.8415	-0.987277	0.0300218
APOE	8607.41	-0.986916	0.0018286
RAB2A	2397.52	-0.984997	2.96232e-09
OSBPL1A	2032.74	-0.984725	3.95272e-08
NA	147.311	-0.982257	0.00677895
PAM16	179.809	-0.982245	0.0252623
BRI3	2248.31	-0.982089	0.00395442
ZBTB24	348.873	-0.980986	0.0126643
DNAJA3	1420.12	-0.979737	0.000306825
SEMA5A	981.21	-0.978851	0.0146115
TXNRD1	14418.3	-0.977725	0.00464313
PDE8B	867.385	-0.975866	9.88102e-05
MZF1-AS1	98.562	-0.975577	0.0496343
PDPN	1047.92	-0.975443	0.0233291
MROH1	935.896	-0.975433	0.000588094
DNAJC3-DT	420.547	-0.974585	0.019399
MORC3	588.447	-0.974409	0.0185628
BIRC2	1282.96	-0.974118	0.0464422
WDR11	1776.54	-0.973672	3.3856e-05
NT5C3A	623.387	-0.973243	0.012846
RRM2B	833.172	-0.973033	0.0406868
CLPX	1454.22	-0.972409	0.000596133
AL450124.1	82.7477	-0.971715	0.0191751
RGS11	219.396	-0.97147	0.00879273
RIPK2	341.122	-0.969954	0.000610062
ENAH	3454.27	-0.96933	0.00167589
PYGO1	442.78	-0.969097	0.0433313
ABHD13	301.494	-0.968653	0.012978
TP73-AS1	1393.32	-0.968022	1.62704e-05
TEAD1	7750.83	-0.967889	0.00494391
KDSR	2071.36	-0.967654	3.37679e-10
ARHGAP18	1050.41	-0.967536	0.0120713
SERP1	2983.21	-0.967042	2.31274e-06
CAPN7	1016.25	-0.965523	0.010654
ERVK13-1	806.573	-0.963954	0.00361147
PLEKHA1	421.653	-0.963577	0.023792
SIRT4	92.4441	-0.962701	0.0298757
LRPPRC	3625.69	-0.962567	0.00958409
LRRC8B	226.776	-0.962121	0.0386313
TBC1D15	782.761	-0.961599	0.0182376
LYPLA1	2282.33	-0.961066	0.000159846
APOC1	819.636	-0.960437	0.016669
ZKSCAN2	801.645	-0.960432	3.40692e-05
SEPHS2	3631.64	-0.960364	7.02626e-10
UBXN8	397.996	-0.959931	0.0089549
ZNF765	243.1	-0.958566	0.0330757
PCGF6	190.831	-0.957086	0.0164773
CDC42EP5	208.539	-0.957084	0.0456664
SEC63	1514.13	-0.95564	0.00174069
MIA3	1916.86	-0.954931	0.00535282
NA	244.388	-0.954329	0.00700951
ZNF19	152.58	-0.953819	0.00455804
EVI5	651.499	-0.953012	0.0176404
ABCG1	1136.94	-0.952428	0.000398966
TRUB1	506.147	-0.952321	0.00704654
FKBP14	1401.49	-0.952103	0.00749642
NUDT11	236.463	-0.952102	0.00342391
EXTL2	1840.62	-0.951839	0.00337495
UBN2	833.865	-0.951408	0.03284
PLEKHA8	971.258	-0.950894	0.00641212
PLIN2	3888.18	-0.950502	0.000636372
XPO4	891.978	-0.950408	0.0156603
TMEM116	302.38	-0.949623	0.000450216
FNTA	1918.73	-0.947668	4.75015e-08
ADAMTS10	724.697	-0.947138	0.000213865
OGT	11752.1	-0.946263	0.00663462
SCARB1	3550.97	-0.946029	0.00270462
BAG2	730.545	-0.945731	0.00806693
ZNF658	169.306	-0.94446	0.0499534
CAMSAP2	1366.93	-0.943661	0.0428765
RAB9A	746.098	-0.94299	2.49702e-05
CCDC144NL	693.564	-0.942111	0.000144445
PWWP2A	1062.63	-0.941726	0.00536543
UTP14C	511.458	-0.941688	0.0123533
TFAP4	301.953	-0.940859	0.00677895
ALDH1L1	429.926	-0.940382	0.0241419
ZNF626	87.1134	-0.940159	0.033862
MCPH1	825.545	-0.940028	1.57546e-06
NCKAP1	4177.96	-0.940023	0.00967683
PRKDC	16303.3	-0.939556	0.000226417
ACADM	814.504	-0.937633	0.0143125
CIPC	899.808	-0.937554	8.67624e-05
PRDM5	311.765	-0.935314	0.0283674
TGS1	1088.2	-0.935106	0.00092669
FNDC10	740.211	-0.932038	0.00209554
EN2	295.826	-0.930192	0.000380099
MTUS1	2330.66	-0.929453	0.00415405
AIMP1	717.819	-0.928538	0.0480014
CDC42BPA	2436.03	-0.92849	0.0291592
SERPINE1	662.737	-0.927459	0.000507979
OTUD6B-AS1	187.298	-0.927317	0.0405282
ANKRD6	571.002	-0.927264	0.000327625
NFIB	2197.26	-0.927212	0.00243513
HERPUD1	3809.91	-0.926783	0.00358039
SCYL2	1395.06	-0.926741	0.0207597
EIF3J	1420.57	-0.925522	0.000497434
YARS1	8082.49	-0.924034	0.0100249
TSPAN18	2154.04	-0.923769	6.20257e-06
CSPG4	1490.06	-0.920925	0.000156166
ELOA-AS1	96.4555	-0.920748	0.0153703
MBP	1754.98	-0.9206	0.00102125
LINC01667	359.742	-0.91819	0.00870935
SLMAP	942.218	-0.916345	0.0427876
NBR2	156.741	-0.915418	0.0101461
BTG3	418.235	-0.915146	0.020349
TMEM205	1649.97	-0.913602	0.0170125
ZNF43	281.354	-0.913598	0.00586596
TAX1BP1	5335.48	-0.912355	0.00489607
SLC38A6	288.874	-0.911508	0.00218251
UHRF2	1281.67	-0.910946	0.0191751
PLEKHA6	506.364	-0.91022	0.0291815
RNMT	1621.18	-0.909802	0.0451953
RSL24D1	2659.07	-0.909736	0.00137757
LARS1	5659.03	-0.909436	6.94788e-05
FOXN3	2583.55	-0.907895	0.000174494
XBP1	3777.39	-0.907156	0.017315
TAF2	1555.83	-0.904892	0.00720653
RAPGEF3	739.521	-0.9038	0.01073
DHX36	1659.97	-0.903613	0.0137753
FAXDC2	918.997	-0.902341	0.000648887
MSANTD3	939.182	-0.901679	9.51118e-07
PUS7	943.158	-0.900623	0.000452222
AJUBA	4175.48	-0.900006	2.41231e-06
ZFAND5	6000.07	-0.899616	3.29895e-05
RAG1	76.9303	-0.899367	0.0451953
AC093525.6	150.78	-0.898656	0.0256585
VASH2	161.821	-0.898314	0.0188825
UBL3	592.456	-0.898077	0.0402243
BAGE2	563.624	-0.897598	0.000131251
LINC01029	759.466	-0.897538	0.000362907
CPVL	3077.44	-0.897329	0.00439013
CLN6	1586.7	-0.896764	0.000832769
TAF1D	2027.36	-0.896647	0.0188845
AC124798.1	183.622	-0.896581	0.0121099
DDI2	1020.61	-0.89629	0.0205718
ZBTB33	983.982	-0.896051	0.0428276
GFPT1	2378.23	-0.895812	0.000364342
NMRK1	147.618	-0.895538	0.00699454
ZNF761	226.21	-0.894974	0.0402243
SMIM19	672.203	-0.894926	0.000142813
UPF3B	301.682	-0.893788	0.0150418
SET	13087.2	-0.893772	9.39858e-06
PDE11A	2272.42	-0.892939	0.000709435
STAG3L5P-PVRIG2P-PILRB	811.516	-0.89162	0.000585644
TXLNG	806.003	-0.891358	0.0141991
ARHGEF35-AS1	686.854	-0.891007	0.00033566
UCHL5	706.52	-0.890738	0.013504
RAB17	2417.11	-0.890154	0.000133531
ERAP1	4379.67	-0.887822	0.00344261
ZC3H8	361.724	-0.887123	0.0378866
LZTFL1	614.825	-0.886166	0.022219
SLC25A37	4433.41	-0.885904	0.000727153
SLC31A1	2923.42	-0.885215	7.58601e-08
MTERF3	354.156	-0.885119	0.032238
ZNF595	1500.69	-0.885105	0.000916111
TMEM126B	868.016	-0.884304	0.00323266
ZNF330	715.734	-0.88129	1.54663e-05
SDAD1	1874.77	-0.88041	0.000489316
STX3	1271.24	-0.880062	0.00105701
GOLGA7	1766.64	-0.879874	7.1175e-08
USP38	669.961	-0.879058	0.0216177
EDEM1	1690.17	-0.878917	0.00169165
NPL	157.246	-0.878801	0.0162978
CREG1	2103.45	-0.878421	6.51453e-06
KIAA0930	2298.3	-0.878215	0.0159117
AP000769.1	590.188	-0.878156	0.000446421
ARL4D	444.807	-0.878004	0.0368415
RASL10B	1747.11	-0.877648	0.000423188
SEPTIN3	430.498	-0.877505	0.00906432
RBBP6	1079.61	-0.876456	0.00240069
CCDC59	343.575	-0.875784	0.0012016
DLGAP4-AS1	88.3284	-0.875686	0.0411601
CAMK1D	921.816	-0.875634	8.08033e-06
TBL1XR1	2538.07	-0.875461	0.0352185
RIOK2	732.6	-0.874535	0.0351151
ARFGEF1	1608.48	-0.8745	0.0459455
RAD51D	900.248	-0.874364	0.00161915
SPATA13	721.635	-0.873199	0.0228082
ERICH1	397.551	-0.872969	0.00687712
MTHFD1L	1064.58	-0.872319	0.0320356
TFB2M	536.382	-0.872275	0.00532117
TEX30	561.175	-0.87126	0.0149154
UBE2W	543.623	-0.870914	0.0041506
CYB5RL	690.03	-0.869557	0.000469364
BNIP3L	4755.57	-0.869188	0.00341345
BTBD1	2473.59	-0.867917	0.0205446
RFC3	660.335	-0.867678	0.00489424
CLOCK	747.404	-0.867099	0.0430003
INPP5B	997.699	-0.867077	0.000553496
PPAT	864.405	-0.865714	0.00880669
WASL	1940.67	-0.865649	0.0260475
CYLD	1096.69	-0.865503	0.00434547
EML1	484.474	-0.864629	0.00201107
ANKRD46	331.944	-0.863922	0.00313822
PELI1	412.57	-0.862591	0.0105501
NCL	13826.1	-0.862096	8.75587e-05
MTSS1	1103.19	-0.861114	0.031804
FAM114A2	648.793	-0.861055	0.00100715
SH3RF3	778.406	-0.860148	9.88806e-05
AVPI1	262.818	-0.856182	0.012386
MAN1A1	354.325	-0.856028	0.0447391
NPM1	12715.6	-0.856006	0.00257757
CCDC25	3146.11	-0.855022	0.00256516
FLYWCH1	2155.73	-0.854099	5.95403e-05
ECI1	2205.39	-0.853136	0.0324818
ABITRAM	648.956	-0.852104	0.0140435
ZMYM2	1341.06	-0.851739	0.0346164
FAM133B	586.405	-0.850816	0.0274564
RAB3GAP2	1547.68	-0.850693	0.0174432
SMG1	4154	-0.848634	0.0105845
SASH1	751.937	-0.848528	0.00676351
DDX18	2664.69	-0.848233	0.0138015
SPAG16	245.068	-0.847148	0.0176829
VAMP4	293.658	-0.846702	0.00880669
MOSPD1	777.046	-0.846454	0.0213961
NDRG2	3696.11	-0.845753	0.00282224
EPB41	1722.95	-0.844226	3.0115e-07
IQCB1	490.549	-0.844059	0.00427514
STX17	579.537	-0.842404	0.0117076
RAB3D	604.149	-0.8416	0.0120814
SORBS1	271.321	-0.841141	0.0043014
CD3EAP	619.026	-0.841035	0.0156743
SIRPA	2599.89	-0.840754	0.00110125
TSPEAR-AS2	314.985	-0.839727	0.00284191
MTFR1	902.61	-0.839631	0.000823139
EIF3E	5569.54	-0.839463	0.0289408
CHCHD3	2162.65	-0.838687	1.60597e-05
ZNF275	1426.77	-0.838134	1.52594e-05
INTS10	2216.03	-0.837603	0.000135399
PACSIN2	3584.98	-0.837161	0.00027027
TNKS	3181.67	-0.837089	2.7213e-06
PABPC1	36481.2	-0.835761	0.00128339
CNNM1	413.598	-0.835621	0.000887756
DPY19L4	1327.52	-0.835218	0.0417629
KTN1-AS1	273.041	-0.833689	0.00971531
MPZ	254.573	-0.831434	0.00163447
MVB12B	548.985	-0.831051	0.00134429
KRT8P12	211.894	-0.831022	0.0253612
ZNF189	546.855	-0.830263	0.0491106
CUL1	2965.53	-0.83009	0.000109882
FGFR1OP2	428.484	-0.828466	0.0473057
RWDD4	479.965	-0.828426	0.0394089
LSM8	743.099	-0.826936	0.0041506
PINX1	414.005	-0.826775	0.0274584
SPAG9	3265.34	-0.826323	0.0360743
PWP2	765.78	-0.824937	0.0419402
METTL21A	573.621	-0.823326	0.000141176
GTF3A	1623.23	-0.823165	0.000118818
C2	716.745	-0.822096	0.00449134
LYSMD2	252.553	-0.821686	0.00168745
PRKAB2	748.451	-0.821313	0.000452575
ZMAT3	804.427	-0.820208	0.00756937
SLFN5	2800.95	-0.818521	0.043241
FEM1B	1985.38	-0.816093	0.0106615
ZNF383	295.771	-0.81592	0.0420825
SAMD4A	1369.34	-0.814613	0.000685453
DR1	1698.42	-0.814265	0.000280442
SEPTIN7P2	264.616	-0.81393	0.0421294
MAF	448.523	-0.813767	0.0278952
WDR43	1112.09	-0.813342	0.0319627
CXCL16	808.38	-0.813075	0.0245248
NOP16	1178.52	-0.812686	0.00646815
RNASEH2B	621.272	-0.812369	0.0283085
LINC01138	166.149	-0.812002	0.0161603
ZNF571-AS1	225.605	-0.811963	0.0273077
MICU2	450.877	-0.811508	0.0424478
SERPINH1	44687.6	-0.810872	0.00454897
SFMBT1	532.779	-0.809094	0.000958335
IMPACT	898.929	-0.808979	0.03665
TMEM51	535.378	-0.808836	0.0115649
KCNN3	227.965	-0.807967	0.0167933
ADH5	5767.06	-0.807843	0.000891089
ZDHHC2	783.921	-0.806677	0.000345354
ACTA2	195.982	-0.805537	0.0418001
CLDN12	1092.53	-0.805444	0.0427215
TLE2	1438.03	-0.805146	0.0348655
DTWD2	224.038	-0.801901	0.0162362
SMIM13	656.746	-0.799008	0.00609312
ADRA1D	736.762	-0.798986	0.00960192
CEBPB	1152.89	-0.798373	0.0120335
SLC23A2	3490.51	-0.79724	0.000199022
LYPLAL1	307.338	-0.796497	0.00326096
GPR158	286.637	-0.792859	0.0270657
PLEKHA3	316.216	-0.79166	0.020304
MRRF	976.252	-0.790361	4.2746e-05
AC022034.1	159.637	-0.790069	0.0407604
FYN	2323.87	-0.789575	0.000104532
RTN4	11287.2	-0.789515	5.47227e-06
PNMA8A	2206.06	-0.788309	3.41864e-05
COG3	1248.34	-0.788102	0.00139744
USO1	2482.24	-0.787697	0.0404905
SDC2	2033.51	-0.786906	0.00134779
PLAU	2013.19	-0.786345	0.00615292
AL365181.3	216.218	-0.786318	0.015793
PLCG2	544.518	-0.785947	0.015874
TMEM86A	489.683	-0.785038	0.0195966
GNAO1	902.036	-0.784942	0.00246052
ACBD3	1225.99	-0.784515	0.0284117
CEP76	221.842	-0.784382	0.0471134
METAP1D	278.534	-0.783858	0.022788
FAM43A	435.349	-0.783382	0.017203
ATP6V1G1	1720.85	-0.783175	0.000427803
GOLT1B	1072.75	-0.783073	0.0198237
SLC38A7	1262.79	-0.783018	0.00016754
CCNG1	8415.43	-0.780506	8.38388e-05
PSMG3-AS1	1024.03	-0.778753	0.00758989
PARN	1790.17	-0.778645	3.94476e-05
NA	873.341	-0.77818	0.000905855
ADAM12	615.637	-0.777582	0.00400122
CABP4	277.418	-0.776175	0.00896195
SYNJ1	642.244	-0.776088	0.0118628
LYRM1	516.587	-0.774316	0.000368736
KCTD3	1445.87	-0.77374	0.0435869
AMOTL2	2161.35	-0.772556	0.0237708
ZNF597	243.674	-0.771714	0.0101838
FAM122A	642.869	-0.771578	0.000775095
TRIM24	1649.75	-0.77142	0.00700546
ZNF542P	908.11	-0.771292	0.000951891
FAM86B1	215.822	-0.771017	0.0152758
SMARCA2	3313.35	-0.771007	0.000246551
PDGFA	1035.43	-0.770881	0.030965
REXO5	254.86	-0.769688	0.0382637
SPAG1	177.866	-0.768563	0.0283696
NDUFAF6	301.54	-0.768222	0.0119937
KNOP1	2186.23	-0.767514	0.00361264
NUFIP1	584.55	-0.766466	0.000440101
SLC7A6	1911.42	-0.76599	8.33328e-05
IMPAD1	3498.41	-0.764765	0.000555712
OPTN	2294.98	-0.763917	0.000992677
MTMR6	664.445	-0.763789	0.00963962
CR381653.1	285.55	-0.762953	0.010393
TRIM37	1733.33	-0.762549	0.00330927
RMDN1	1323.3	-0.761605	0.00456102
ATXN7L1	447.916	-0.761134	0.000489265
ZNF419	500.263	-0.76051	0.0096263
AC092279.2	162.947	-0.760461	0.0171366
SUPV3L1	761.897	-0.760343	0.00290204
KAT6A	2902.1	-0.760104	0.00909315
PXK	600.361	-0.759984	0.00132852
DDX19A	4592.06	-0.759733	0.00409042
ATP6V1E2	242.819	-0.758203	0.0251799
NOTCH2	10974.4	-0.757937	4.89175e-06
S1PR2	535.896	-0.756845	0.00212528
GLIS2	732.964	-0.756217	0.00960231
ZNF169	175.382	-0.755954	0.0348101
C8orf76	792.408	-0.755617	6.56793e-05
NFE2L1	19366.2	-0.753225	6.32988e-06
SHC2	989.203	-0.753149	0.0150259
ZBTB37	416.088	-0.753116	0.0360716
PTPN12	3681.97	-0.752641	0.0307846
ORC6	793.727	-0.751601	0.00106532
SRBD1	610.508	-0.751216	0.0479148
HNRNPA1L2	135.879	-0.749497	0.0481004
NEMP1	1472.03	-0.749394	0.0136877
FAM216A	668.224	-0.747895	0.000554296
TYRO3	1740.32	-0.746942	0.0145369
RRP12	2118.01	-0.746104	0.00698981
RBM18	1074.94	-0.745775	0.00123021
ZNF322	1494.16	-0.745584	0.0126109
SMAD6	803.328	-0.744793	0.0268483
NEK6	5032.22	-0.744698	0.0043862
WDR36	2317.62	-0.74458	0.0285544
TMEM268	1130.82	-0.743281	0.00281047
THBS2	2286.28	-0.742963	0.0278274
RBPMS	981.685	-0.742478	0.0269377
ASAP1	3775.47	-0.741823	0.0048242
RASA4B	725.446	-0.741359	0.0200669
P4HA2	2433	-0.741136	0.000540632
GOLM1	3211.44	-0.740689	0.000480158
CSNK1A1	4221.06	-0.740615	5.95369e-05
MARCHF3	253.563	-0.74021	0.0402243
ABCC1	3948.89	-0.739782	0.00293067
PLGRKT	373.572	-0.739759	0.00235916
AKNA	1307.84	-0.737942	0.00531956
NOLC1	3395.07	-0.736889	3.54904e-05
NA	4296.82	-0.736708	0.00284037
ZNF841	347.545	-0.73603	0.0271955
RBM28	1860.28	-0.735854	0.00162356
URI1	1854.3	-0.733135	0.00311719
RNF170	500.959	-0.732848	0.0337858
TONSL	1019.09	-0.732035	0.0146739
TUBGCP3	624.242	-0.731273	0.00757546
CREM	268.75	-0.730506	0.0185781
GCSHP5	276.989	-0.730342	0.0273077
PNMA2	2251.69	-0.729984	2.61974e-05
GAS5	5042.73	-0.729872	0.00375053
SPTAN1	18067.4	-0.729819	0.00237035
SLC43A1	1132.98	-0.729538	0.0324767
ZNF773	382.176	-0.728214	0.0316351
CLCN7	1807.02	-0.725959	0.0217704
DHRS11	824.832	-0.724677	0.0114932
ABCE1	2517.17	-0.724477	0.049194
RHBDL3	392.886	-0.724245	0.0368173
AP3M2	1176.55	-0.723706	0.00540968
RXYLT1	654.75	-0.723462	0.00979042
MYBBP1A	5512.33	-0.722506	0.00833125
METTL22	1008.21	-0.722453	0.0310207
GPR137B	378.585	-0.721474	0.00136475
CERS6	1492.32	-0.720759	0.0301026
HSPA5	35020.7	-0.720489	0.000357437
KLHL7	1628.87	-0.719642	0.0168754
PEA15	7147.47	-0.719467	0.0261879
TGFBR3	1281.09	-0.717116	0.040659
GPN3	531.58	-0.717028	0.00137495
RBM20	326.331	-0.716201	0.0107427
[truncated: 2,607 more rows]

## Sheet: DEG_YT_shZZZ3_VS_shNT_pad
ext_gene	baseMean	log2FoldChange	padj
HCG9	53.194	-8.95273	3.92521e-05
IL1RL1	10.0353	-8.3437	0.000139932
FGF19	10.5273	-8.20063	0.000139932
KLHDC7B	70.6784	-7.76279	1.05542e-20
UGT1A10	9.99061	-6.92807	0.00532719
NPY6R	10.2935	-6.71388	0.00145271
UGT1A8	7.12107	-6.34895	0.0187968
FGF21	7.5998	-6.31001	0.00716131
NA	10.3137	-6.20044	0.00370213
FIBIN	11.6639	-6.19881	0.000159718
LCN2	26.3053	-6.15261	1.87437e-08
FAM30A	7.00482	-5.99234	0.0300576
L3MBTL2-AS1	17.1565	-5.69923	1.91042e-06
UGT1A9	11.4507	-5.69657	0.0137084
MYH15	39.5307	-5.42526	1.65041e-05
MUC5B	19.8908	-4.78164	0.00911608
LINC01081	12.283	-4.76191	0.000120089
GPR1	116.408	-4.7321	2.47639e-25
INHBE	515.418	-4.7254	1.58524e-07
MYBPC2	12.1995	-4.68776	0.000451439
HNF4A	22.1918	-4.61944	0.000103467
PTGDS	193.603	-4.59955	9.0664e-44
PRDM16	12.1088	-4.59111	0.000267404
TBX15	23.5043	-4.59024	6.44028e-07
FAM47E-STBD1	37.608	-4.50908	2.36718e-06
PROX1-AS1	9.50492	-4.4821	0.0416188
MYHAS	16.3751	-4.47618	8.04092e-05
TENM2	450.308	-4.46432	2.42116e-18
OSCAR	98.2405	-4.32627	3.12248e-26
CILP	27.3464	-4.29262	2.42331e-07
NMRAL2P	127.784	-4.25963	1.36107e-20
MAGI2-AS3	9.30667	-4.24107	0.00996374
IL34	25.9818	-4.22784	4.25151e-05
PHF24	74.394	-4.11572	4.20382e-07
AKR1B10	986.137	-4.11408	1.09558e-12
ADGRB1	63.5674	-4.02217	1.58524e-07
AC112721.1	11.8798	-3.96458	0.00983169
NR1H4	297.901	-3.9488	6.41324e-15
AC100802.1	57.2115	-3.92942	8.27209e-10
WT1-AS	162.301	-3.86867	6.25907e-08
SLITRK2	16.2718	-3.86079	0.000996525
TAT	13.3999	-3.82317	0.00163964
NA	13.9455	-3.80911	0.047794
KIAA1210	145.403	-3.79952	4.04635e-05
FBN3	29.0958	-3.79925	0.00295532
AC091078.1	7.41336	-3.7971	0.0283348
CHI3L1	76.7522	-3.76638	5.54014e-08
NAT16	7.94798	-3.75478	0.0061619
MYH13	148.802	-3.72875	2.08929e-12
GSTA3	10.5003	-3.63736	0.0225983
DNAH10	114.712	-3.60334	1.0728e-07
C1S	2815.25	-3.55116	1.50926e-37
ESPNL	12.1478	-3.50562	0.00862528
CACNA1H	41.5383	-3.49894	2.21095e-07
ADM2	699.858	-3.48517	1.31735e-13
WT1	424.94	-3.46333	1.4342e-07
GDF15	136.255	-3.44096	4.39786e-11
PKP1	10.3289	-3.41935	0.0225557
CLEC3A	32.6793	-3.38946	2.1815e-08
ASS1	709.649	-3.37183	1.44284e-10
NRXN3	104.714	-3.36651	2.19389e-10
CLCNKA	18.2259	-3.35927	0.00172137
CDH12	54.5216	-3.35072	0.000467678
LINC01262	14.5586	-3.31538	0.00227122
GDAP1L1	21.6171	-3.30368	0.0071541
CYP21A1P	8.50507	-3.29933	0.0214068
GRIK5	52.9516	-3.29681	1.50433e-05
AREG	9.93241	-3.29531	0.010514
PPP1R14C	9.6038	-3.23687	0.0187968
STC2	3185.23	-3.21114	1.53423e-15
ACTN2	32.2946	-3.18278	0.00580078
MMP28	65.0705	-3.16325	0.000859394
SFTPC	9.16327	-3.15494	0.0283698
STK32A	25.3994	-3.13411	0.0117928
PLIN4	108.419	-3.10558	5.09436e-13
SILC1	61.2741	-3.08612	1.75756e-09
INSYN1	511.914	-3.05853	6.41324e-15
AC005336.1	19.599	-3.0534	0.00620871
DHRS3	17.8463	-3.04619	0.00046384
VLDLR-AS1	46.493	-3.0355	1.53226e-05
TKTL1	59.2551	-3.03205	9.08986e-07
KCNQ1	12.7332	-3.02153	0.0374218
ATP1A2	159.33	-3.0206	5.25336e-13
CSF3R	14.5747	-3.01581	0.0428247
LINC02211	7.26153	-3.01005	0.0417381
SELP	160.703	-3.00435	1.68523e-07
SLC7A3	49.0331	-3.00067	0.00190531
IGFBP5	27458.8	-2.997	1.98252e-17
LPO	17.5289	-2.97007	0.00716131
SLIT3	780.564	-2.9679	2.08768e-11
CYP4F11	427.536	-2.96256	5.66315e-07
COL22A1	15.4996	-2.95194	0.00841185
ATP10A	23.5651	-2.94619	0.000386458
CSTA	16.8679	-2.93159	0.036752
SLCO2B1	9.57196	-2.93095	0.0317437
BCAN	248.892	-2.91074	0.00889156
C3orf80	167.452	-2.9099	1.28837e-11
AC116351.1	128.357	-2.90511	1.46807e-09
SLC7A11	896.111	-2.89323	0.00183809
LILRA2	12.1296	-2.88714	0.0228034
BEST1	63.6523	-2.86535	2.58033e-08
AC100803.3	9.34872	-2.85724	0.0359891
IDI2-AS1	17.0254	-2.84365	0.00132019
IDH1	8923.76	-2.84119	1.24802e-25
MEGF6	167.785	-2.83089	3.61081e-06
MFAP4	1475.53	-2.8272	5.28317e-24
ANK2	891.092	-2.81818	5.14786e-11
GALNT9	91.8677	-2.81617	1.7216e-06
C4B	3687.51	-2.81486	2.15589e-11
LINC00900	32.6461	-2.81174	0.00092475
ZNF727	15.8328	-2.77607	0.0113528
THNSL2	64.5478	-2.76333	1.7426e-06
LGALS12	430.57	-2.75228	7.47196e-15
LINC01551	25.0168	-2.74211	0.00359237
TM6SF1	111.47	-2.7368	2.07405e-06
C4A	2142.66	-2.72663	1.87437e-08
IL20RB	33.0934	-2.72367	0.000238872
NRCAM	106.766	-2.72144	4.01486e-13
AP006333.1	126.9	-2.71822	3.18619e-14
DUSP26	45.6707	-2.71786	2.00136e-05
DDIT3	1280.59	-2.69531	1.53423e-15
LAMP3	196.895	-2.69134	2.49396e-20
DSG2	296.564	-2.68543	3.02579e-08
DUOXA1	76.8079	-2.67637	2.49831e-07
PLAC1	37.815	-2.66857	3.23365e-05
ASPA	46.6297	-2.66616	2.90934e-05
ASNSP1	225.314	-2.65191	1.19043e-07
SPP1	4337.69	-2.63682	1.06742e-23
CHAC1	565.993	-2.63039	1.58524e-07
FAM87A	13.6642	-2.6148	0.0217575
LCP1	215.9	-2.59901	5.16536e-06
AL365361.1	48.0768	-2.59892	0.000467678
CST7	16.679	-2.58457	0.00317389
CTH	535.5	-2.581	4.79214e-15
CDX2	14.5421	-2.56725	0.0214068
TRPV6	103.385	-2.55314	0.000171311
NUPR1	3967.9	-2.54613	5.80574e-10
IFI27	478.375	-2.53301	3.08091e-06
JAKMIP3	47.8577	-2.53298	0.000201958
DAPL1	113.088	-2.52596	4.23965e-05
MRO	67.0013	-2.52541	0.000775983
SCTR	53.0559	-2.5078	2.71317e-06
CLGN	86.0431	-2.50667	0.000143275
IL31RA	46.0301	-2.50593	3.07347e-05
AC125611.4	26.0539	-2.49941	0.00313828
PLIN5	38.5076	-2.49709	0.00292918
HPN	12.1868	-2.48766	0.0252771
TAGAP	30.9292	-2.48279	0.00145271
IP6K3	85.1802	-2.48025	3.41083e-08
SERPINA1	98.3548	-2.47512	5.31739e-05
CARNS1	37.1908	-2.46959	0.000602734
SH3GL3	128.524	-2.46289	2.62974e-10
GCSAML	48.3582	-2.45743	1.84422e-06
TNFRSF9	124.559	-2.43777	6.19956e-09
AC148477.5	20.0893	-2.43128	0.0100495
GATM	35.5362	-2.42282	0.00431245
MYH1	59.0316	-2.41323	1.07175e-05
AC006970.2	32.4674	-2.41141	0.000640776
POM121L2	17.9066	-2.40659	0.014666
OSGIN1	1249.17	-2.3962	2.94686e-08
AL713998.1	25.971	-2.39443	0.0110698
AL136962.1	98.3065	-2.39365	1.90579e-09
TMEM255A	459.642	-2.38803	8.11213e-21
TMEM176A	36.1416	-2.38243	0.00262563
DHH	34.2812	-2.36975	0.0247017
SMPD3	48.4469	-2.36496	0.0254801
AGBL1	14.3702	-2.34912	0.0493322
DES	38.3913	-2.33832	0.00459372
NTRK1	60.5613	-2.33719	3.94097e-06
CARD9	38.3538	-2.33279	1.7193e-05
EGR3	20.8278	-2.33206	0.0185294
KCNA2	47.419	-2.33118	0.00483549
WFDC21P	64.0083	-2.32361	0.00442229
NDUFA4L2	113.819	-2.32078	3.40938e-05
UNC5B	1289.28	-2.3176	4.22567e-26
AC097359.2	157.669	-2.31478	3.95238e-15
LAMA1	2598.25	-2.30931	7.51008e-14
PRKCB	2720.01	-2.30659	1.14973e-06
RNF165	118.7	-2.30598	1.43648e-06
KCNA3	68.979	-2.30123	0.00531238
ART5	18.4826	-2.29891	0.0448376
ESR2	37.7336	-2.2898	4.2778e-05
ESRP1	135.819	-2.28864	3.70971e-09
TMIE	21.2313	-2.28079	0.00476218
DLGAP1-AS2	178.081	-2.27701	5.35511e-11
GJA3	379.977	-2.27167	1.61702e-20
NAP1L3	82.0276	-2.26935	2.67883e-06
AC005307.1	604.703	-2.26304	6.63349e-05
LONRF2	255.229	-2.26069	6.10038e-07
LUCAT1	249.967	-2.25904	4.0789e-16
C8orf49	53.0657	-2.2582	7.48563e-05
ST6GALNAC3	222.932	-2.25778	0.00064997
AC069120.1	32.3657	-2.25098	0.0116405
CPEB1	381.103	-2.24539	6.8984e-12
STOX2	129.444	-2.24307	0.0123546
FBLN5	715.206	-2.24171	1.274e-11
WARS1	11983.4	-2.23868	9.09815e-11
TMEM176B	38.9979	-2.22762	0.000175931
P2RX7	923.847	-2.22683	1.80855e-18
NIBAN1	1237.47	-2.22258	4.43582e-11
RARRES2	7215.29	-2.2137	1.92168e-05
PLEKHA6	506.364	-2.2021	3.48828e-09
AC015909.1	15.869	-2.19106	0.0487012
ACSM5	27.4709	-2.19091	0.0145314
IGF2	457.601	-2.18733	2.80548e-26
TMEM63C	327.543	-2.18703	6.2352e-11
PSAT1	10696.8	-2.18212	2.71886e-09
RFTN2	52.5391	-2.17355	0.00110182
NUDT10	24.1872	-2.16725	0.00249997
LINC01303	42.0784	-2.16615	0.000974783
CHST1	265.268	-2.16045	4.70803e-05
MYH8	692.77	-2.1568	0.00436461
LAIR1	104.253	-2.15621	6.42394e-06
CX3CL1	602.025	-2.15363	3.86998e-06
C1orf158	14.2167	-2.14767	0.0427517
TNFRSF10C	19.7623	-2.14594	0.0200992
BEX2	140.677	-2.13924	0.00197366
SULT1C2	232.948	-2.13517	2.9248e-09
PNMA3	332.84	-2.13445	1.22737e-17
CACNA1E	52.2429	-2.13087	0.00707396
NTF4	39.1114	-2.13032	0.000817745
NEBL	184.482	-2.11029	2.07405e-06
TRIB3	6385.91	-2.10998	1.63128e-08
LRRC2	80.4071	-2.10645	0.000171662
NA	25.334	-2.10344	0.00469871
ACSS3	124.794	-2.09996	1.47927e-07
INMT	1378.13	-2.08147	0.0282532
MMP23B	30.8853	-2.07959	0.0110722
SHISA3	299.741	-2.07924	0.00538578
COL14A1	338.733	-2.07246	6.26234e-10
LRRC37A7P	54.2386	-2.05576	0.000399406
ULBP1	436.862	-2.05293	9.77742e-13
AP001596.1	17.9545	-2.04696	0.0369821
NXPH4	644.356	-2.03852	1.84838e-08
SLC6A9	614.24	-2.03532	6.28907e-07
MEGF11	26.044	-2.0325	0.0244245
SAMD11	394.532	-2.03177	2.28619e-08
LINC01133	21.8308	-2.02278	0.0418627
SLC2A3	2525.29	-2.02058	3.23847e-23
VEGFA	2890.66	-2.01943	1.75492e-12
SLC16A7	164.025	-2.0149	0.000127905
LIMS2	352.336	-2.01452	5.0747e-05
IGSF5	73.6239	-2.00422	1.02196e-05
MAFF	385.129	-2.00288	1.03087e-12
NPAS1	730.116	-1.9991	8.80756e-07
CACNA1B	67.8615	-1.99762	4.5266e-05
KLF15	139.536	-1.99761	2.21678e-06
SLC7A5	11310.8	-1.9896	2.24056e-09
MSC	551.044	-1.98651	4.52044e-07
SLC16A6	71.324	-1.9825	0.00223387
SEMA3E	18.2871	-1.97799	0.0304274
LINC02387	72.26	-1.97413	0.00682083
ALG13	989.31	-1.97403	0.000821099
TNMD	32.5506	-1.96756	0.00618577
ZC3H12B	90.0397	-1.96611	2.46598e-05
ERN1	875.041	-1.95425	4.28365e-10
TRIM58	163.543	-1.95386	0.000626788
PAPLN	1065.33	-1.94816	3.09658e-11
F11-AS1	113.538	-1.94099	0.0294022
ASNS	6962.29	-1.93713	3.8162e-06
AC007405.4	60.0931	-1.92905	1.44553e-05
FAM215B	49.8299	-1.92079	0.00095493
CCPG1	1611.41	-1.91797	8.641e-09
PRKAG2-AS1	41.1193	-1.91544	0.0020125
KCNJ6	362.539	-1.91102	0.00690811
UGT3A2	1220.41	-1.8998	4.96241e-16
MSC-AS1	230.505	-1.89227	1.14056e-06
ADRA1B	187.31	-1.88395	1.84393e-07
IL6	38.6322	-1.88125	0.00213819
ME1	408.917	-1.87606	1.09065e-07
CEBPG	1152.95	-1.87532	6.27696e-07
KCNK15	48.6216	-1.87517	0.00642103
RPS6KA2	1029.52	-1.87289	1.52835e-18
KCNAB2	1475.03	-1.87125	2.77434e-12
AMBP	44.7905	-1.86915	0.0122264
PTPRH	338.34	-1.86659	7.159e-08
ERVV-2	39.5215	-1.86145	0.0161066
PNCK	53.1023	-1.85903	0.00206069
FUT1	113.122	-1.85889	4.27583e-07
NOXA1	28.6582	-1.85723	0.00971739
PLAT	16916	-1.84956	2.62788e-10
ZMYND15	23.4137	-1.8478	0.0410822
SLC40A1	108.381	-1.847	1.15113e-05
IQANK1	46.8904	-1.84648	0.00220845
LYPD6B	456.485	-1.84136	0.000384648
PMEL	48.1542	-1.84059	0.0113493
CPA1	48.0902	-1.83717	0.0336241
LYNX1	660.055	-1.83484	2.91018e-06
CUX2	157.634	-1.83013	0.0146367
BIRC3	139.85	-1.828	0.00395054
MTHFD2	5589.11	-1.82073	1.09558e-12
LINC01239	55.3526	-1.81885	0.000153763
KCNH2	213.182	-1.81706	2.60562e-08
AGAP2	165.254	-1.81551	2.71411e-06
LINC00243	23.9064	-1.81305	0.0242542
FAM149A	79.8181	-1.81184	5.16854e-05
DNM1P51	105.663	-1.80562	0.00945967
FOLR1	125.894	-1.79908	0.000409645
IL2RG	99.3642	-1.7937	0.00172296
PRAP1	179.571	-1.79294	1.66901e-05
LINC00662	333.517	-1.79165	2.91018e-06
IL2RB	466.683	-1.78555	2.13883e-09
ARRDC4	1365.01	-1.78467	6.68226e-12
LYPD9P	45.4022	-1.78189	0.00341671
IRF8	40.9138	-1.78135	0.0158244
NECAB2	68.2199	-1.77912	0.000181084
PAQR5	338.671	-1.77483	2.9319e-10
CD96	28.867	-1.77232	0.0419606
CST2	35.9971	-1.77225	0.0124648
ADGRG3	34.3201	-1.77041	0.0106392
MMP17	129.895	-1.76829	0.000741882
EPDR1	1058.58	-1.7681	1.67687e-18
LIFR	11801.4	-1.76513	0.000462279
ITGAX	95.0595	-1.76233	1.7193e-05
ATF3	272.449	-1.7587	1.5099e-08
HSBP1L1	238.735	-1.75824	5.0806e-14
SLC22A15	160.551	-1.75641	0.00973961
DMGDH	217.504	-1.75433	2.58862e-06
KLHDC7A	45.1184	-1.75391	0.00669141
PKD1L2	564.186	-1.75252	1.08021e-16
GSKIP	440.377	-1.75222	6.26382e-05
SLC25A18	39.6653	-1.75045	0.00578304
PCK2	3700.44	-1.74624	1.76988e-06
SULT1A2	326.088	-1.74554	0.00023725
ICAM1	10930.6	-1.74088	9.02281e-15
AC083862.2	115.696	-1.73898	1.0728e-07
FABP3	79.2301	-1.73734	0.00406665
VSX1	17.9241	-1.73703	0.0354661
TMEM40	70.2183	-1.73333	0.0380063
C21orf91	805.018	-1.73233	2.77815e-05
AC016831.1	48.3554	-1.73218	0.00933833
CLIP4	1069.34	-1.7312	7.17741e-09
HLA-DMB	631.07	-1.72748	1.7216e-06
LINC00508	46.1683	-1.72666	0.00734372
ANGPTL4	338.958	-1.72171	0.00439375
AC008555.2	41.0078	-1.72074	0.0104157
RIMS3	571.256	-1.72006	6.16835e-05
KCNJ11	33.1126	-1.71982	0.0101867
AOC1	32.6049	-1.71887	0.027612
KREMEN2	307.07	-1.71556	9.54445e-05
SH3RF3-AS1	23.2675	-1.71451	0.0394409
KIF1A	48.7016	-1.71239	0.0404289
SERPINA3	66.9812	-1.7057	0.00483549
EPHX1	4268.91	-1.70511	9.00843e-05
CEACAM1	1356.56	-1.70296	2.55686e-08
CEBPA	56.4506	-1.70221	0.00444496
ATP2B2	90.8594	-1.69942	0.00144177
PANX2	200.213	-1.69768	2.07405e-06
ABCC4	4666.1	-1.69735	4.98593e-07
PRSS16	106.289	-1.69682	0.00176496
LINC02610	34.2327	-1.69603	0.00497812
BHLHE41	296.843	-1.69462	1.13932e-07
PTGS1	3176.38	-1.69448	0.000967169
CHST4	70.6306	-1.6922	0.0274178
AL117378.1	114.005	-1.68883	0.00345488
CAVIN4	29.7377	-1.68539	0.0369065
SULT2A1	84.648	-1.6838	2.63844e-05
ZIC5	51.3381	-1.68028	0.0112854
KCNF1	65.766	-1.67753	0.0155586
XYLT1	1563.12	-1.67512	3.90965e-21
TMEM140	1123.95	-1.67497	3.28069e-12
DLL3	241.909	-1.67399	2.03548e-08
ATP1B2	460.828	-1.67092	1.21017e-07
KLK10	22.3747	-1.66726	0.0476357
SOHLH2	108.573	-1.66668	9.10271e-07
KCNJ4	34.9889	-1.66561	0.00826199
AZGP1	97.8991	-1.66263	0.000643564
FAM167A	251.226	-1.66224	6.9823e-08
NA	36.2324	-1.66178	0.0256637
WNT10B	51.3989	-1.66091	0.00422575
SHC4	188.253	-1.65998	4.34823e-05
ABLIM2	31.5127	-1.65797	0.0225983
CHMP4C	88.3622	-1.65788	0.000230549
FHIT	37.6978	-1.65601	0.0370906
DNAJB9	957.001	-1.65389	2.8738e-08
APOL1	3924.77	-1.6526	4.89413e-11
PTH1R	52.0492	-1.65245	0.0030419
IFRD1	2224.28	-1.6498	7.829e-07
SLC3A2	5929.53	-1.64685	3.05623e-10
NA	149.906	-1.64656	0.00483494
SLC16A4	760.63	-1.6416	9.73782e-11
BCL6	680.622	-1.64108	2.15319e-18
RPLP0P2	160.308	-1.63906	0.00264029
RB1CC1	1838.03	-1.63709	0.00154549
BLVRB	2138.04	-1.63644	6.01228e-05
GPNMB	4256.7	-1.634	4.92398e-15
HR	217.914	-1.62523	3.80557e-08
SLC16A11	51.8709	-1.62299	0.012843
FN1	176837	-1.62119	4.53894e-08
TMEM51-AS1	66.5842	-1.60934	0.00989581
FAM83H	326.456	-1.60823	0.000565601
SBDS	3028.1	-1.60289	2.14816e-11
FAM215A	41.5042	-1.59767	0.00896221
SMAD9	278.407	-1.59616	5.92027e-07
CD38	152.926	-1.59577	3.07347e-05
SERPING1	1247.33	-1.59281	2.29466e-07
AC020929.1	77.4238	-1.5924	0.0169733
LINC01139	74.2232	-1.59227	0.00844875
SHISAL1	228.019	-1.58897	0.0157615
AQP3	151.228	-1.58727	6.55614e-05
SLC1A4	1283.33	-1.58706	5.08762e-07
GPC4	1336.9	-1.58527	1.33944e-17
CAMSAP3	165.772	-1.58514	0.00264029
ELFN1	246.365	-1.5838	1.7596e-06
CNTFR	1505.8	-1.58119	9.62916e-05
NQO1	35627.5	-1.57887	5.55559e-06
MYCL	127.603	-1.57511	0.000425919
LMNTD2	58.5444	-1.57352	0.00466026
TMEM266	52.1249	-1.56993	0.00951532
CHRD	93.0768	-1.56638	0.000890438
LMO2	813.61	-1.56572	1.1579e-11
TMEM191C	75.2461	-1.56326	0.00378145
C7	289.668	-1.56077	0.0380591
XPOT	7157.3	-1.55478	3.71506e-05
GATA4	1572.17	-1.55436	3.41585e-08
AL021392.1	22.1927	-1.55375	0.0484219
SLC7A2	1061.14	-1.55219	3.86696e-06
CEBPB	1152.89	-1.54618	1.17551e-07
COL15A1	16691.5	-1.54204	2.31496e-07
SEMA6A	614.172	-1.54114	0.00207157
KLF4	175.596	-1.53932	0.000614149
ZNF853	899.853	-1.53681	1.89465e-08
SHMT2	9387.1	-1.53651	0.000375042
HKDC1	79.0092	-1.53344	0.000216494
KIRREL2	71.5585	-1.53298	0.000844671
TXNRD1	14418.3	-1.52942	3.10144e-06
PCCA-DT	465.959	-1.52896	6.24377e-10
CSF2RA	645.111	-1.52703	2.37689e-09
LHX8	287.367	-1.52523	8.50921e-06
CECR2	358.267	-1.52374	7.25003e-07
IGLON5	605.638	-1.52363	1.88944e-05
AP1M2	90.4861	-1.51868	0.00380664
NAMPT	2975.27	-1.51689	0.000141451
LINC02593	310.428	-1.51292	6.68171e-07
SLC1A6	103.408	-1.51154	0.0011888
AF131216.3	44.8791	-1.50356	0.0129913
SLC39A14	4543.99	-1.50023	4.25211e-17
NLRP12	69.6274	-1.49838	0.000758552
DNAJB5	1132.66	-1.49614	2.08108e-05
HOXA1	336.266	-1.49288	9.22912e-08
SLC25A30	786.971	-1.49074	2.07238e-05
DUSP2	193.106	-1.49062	0.0164158
JAG2	393.156	-1.4881	3.23004e-06
PPP1R1B	121.527	-1.48669	0.00690811
DDIT4	4598.97	-1.4848	4.38627e-05
AKR1C3	537.492	-1.48423	0.00139251
ZMAT3	804.427	-1.47762	2.49831e-07
BHMT2	407.932	-1.47178	2.7057e-06
MAGEA11	1050.46	-1.47139	0.000998687
RAG1	76.9303	-1.47027	0.000463517
TMPRSS3	41.8045	-1.46546	0.0333943
BTF3L4P2	129.758	-1.46543	0.00333126
GFOD1	600.161	-1.4614	0.00100503
KCNE3	58.8083	-1.46069	0.0317588
GFRA3	187.974	-1.46049	0.00615703
SERPINE1	662.737	-1.45819	1.23559e-08
C12orf66	261.565	-1.45678	1.5565e-07
ITIH5	85.4475	-1.44644	0.0043623
TPD52L1	1644.91	-1.44584	4.25225e-10
NAMPTP1	143.308	-1.44534	0.00435743
FKBP9P1	144.323	-1.44461	3.62383e-06
FAM102A	1630.37	-1.44322	6.92834e-07
LINC02861	89.6336	-1.44212	0.00216171
ZNF114	311.372	-1.439	1.12614e-05
ENPP2	574.082	-1.43864	1.89012e-08
RUNX2	408.783	-1.43676	4.10332e-05
GARS1	10012.5	-1.43484	9.7963e-07
SLC7A1	2848.22	-1.43389	7.17741e-09
OLFML1	50.2321	-1.43317	0.0260532
CTSV	471.037	-1.43294	7.42636e-07
PDGFA	1035.43	-1.43179	1.2778e-05
CACNG6	150.901	-1.4307	0.0013756
SEC23B	3222.47	-1.42679	1.8384e-11
TLR4	811.536	-1.4247	0.000322941
STX7	1070.33	-1.42357	8.19721e-07
CDH15	157.345	-1.4229	0.000220886
DOCK3	196.831	-1.41993	1.05302e-05
LGMN	2896.81	-1.41647	3.19817e-10
RND1	126.778	-1.41625	0.0197956
HUNK	308.368	-1.41472	0.0100079
GHR	64.6562	-1.41	0.00618517
CLDN1	174.862	-1.40858	0.0410589
B4GALNT3	483.789	-1.40709	0.001678
DDR2	8460.8	-1.40499	4.97611e-06
ASPG	217.872	-1.40316	0.00122987
KIF21B	372.605	-1.402	5.11316e-06
IL1R1	1184.59	-1.40064	0.000243557
NA	304.066	-1.39887	0.00470248
AP000662.1	71.131	-1.39786	0.0314287
SGTB	708.095	-1.39604	5.81192e-09
LBH	692.223	-1.39533	2.29215e-05
PDE11A	2272.42	-1.39443	3.18049e-08
FTL	97234.9	-1.3917	0.000110923
SOCS3	894.578	-1.3911	0.000906359
PTPRU	915.554	-1.39042	1.28467e-08
APOE	8607.41	-1.39016	5.77557e-06
PPP1R15A	1547.16	-1.3852	2.6412e-09
SLC2A4	454.42	-1.38435	7.2787e-06
TCEA1	4469.49	-1.38367	1.87495e-08
TRIM16L	3167.66	-1.38133	8.57344e-05
PCSK4	85.968	-1.37959	0.0236929
AC004854.2	48.7081	-1.37482	0.0483958
AC118549.1	950.488	-1.37121	0.00216183
ARHGAP18	1050.41	-1.3705	0.000247801
CD55	543.052	-1.37031	2.51604e-09
CEBPD	156.526	-1.36918	0.00427991
EBF3	63.4126	-1.36415	0.00622192
PPP4R4	56.2206	-1.36211	0.0143828
SESN2	1370.02	-1.3619	0.000263015
NLRP5	59.0657	-1.36095	0.0101584
ZGRF1	415.221	-1.35811	0.0216407
SBDSP1	343.599	-1.35708	0.000149237
IFI6	2625.66	-1.35681	0.000710487
UPP1	1694.72	-1.35456	0.00126016
MAN1C1	247.831	-1.35425	0.0058854
TMEM100	175.804	-1.3526	0.00687867
TYRP1	91.9342	-1.3503	0.0113155
SEMA3B	660.452	-1.34912	0.00391878
TSPAN33	579.801	-1.34821	0.00473346
MBNL2	3101.67	-1.34332	0.0017496
FAM66C	47.1075	-1.34284	0.0427517
CLCN5	385.033	-1.34166	0.00239912
RTN4R	315.985	-1.33884	0.00831435
LIF	184.108	-1.33824	1.03826e-05
FTH1	82418.1	-1.33669	0.000203784
GPC3	320.761	-1.33564	0.00556316
MZF1-AS1	98.562	-1.33556	0.0065901
CA12	157.887	-1.33489	0.0116837
AC017100.1	67.9264	-1.33277	0.00915568
C3	394.823	-1.3321	0.000741882
RGS11	219.396	-1.3318	0.000313017
CLIC6	134.767	-1.33128	0.000102277
EEF1A2	3725.81	-1.33099	0.0111416
SULT1A1	4720.04	-1.3309	0.00292918
MBP	1754.98	-1.32881	9.01771e-07
SMAD6	803.328	-1.31922	2.30329e-05
LOX	937.184	-1.3179	8.17243e-06
SLC35F6	2356.32	-1.31569	1.41827e-07
MAT1A	901.902	-1.31541	2.4828e-06
CHRM4	72.1678	-1.31478	0.0248382
SLC47A1	148.277	-1.31475	0.0143517
TMED2	6748	-1.31433	6.61365e-16
AC022167.2	174.505	-1.31407	0.000679855
RASGRF2	215.559	-1.31328	2.41644e-06
SH3RF2	151.312	-1.31268	0.000685313
LARGE1	633.247	-1.31066	5.81192e-09
GLB1L	3053.34	-1.31051	2.2599e-10
NFKBIB	605.334	-1.3099	1.22009e-05
FBLN2	8498.83	-1.30439	0.00249099
ICAM5	765.703	-1.30416	1.62414e-07
FAM66B	35.4561	-1.30193	0.0375579
IL6R	482.429	-1.29973	0.000602308
ZFP92	133.392	-1.29655	0.000597779
ELMOD1	45.1267	-1.2938	0.0335121
ITPR1	945.189	-1.2935	2.19931e-05
ZSCAN31	211.932	-1.29273	0.00566047
GNAL	375.111	-1.29172	4.12106e-05
AMOTL2	2161.35	-1.28978	5.55875e-05
LRRN2	417.809	-1.2897	0.00476398
LSR	532.799	-1.28738	0.0496607
C1QTNF5	801.42	-1.28647	0.00152618
PARP8	88.8578	-1.28484	0.0414526
C2	716.745	-1.27999	3.28814e-06
NCR3LG1	1098.02	-1.27936	2.3368e-09
VASN	2634.28	-1.27844	4.72122e-05
ENTPD8	54.1929	-1.27693	0.035394
AC148477.2	75.1935	-1.27693	0.00767011
IARS1	13328.8	-1.27637	6.63915e-05
ATXN1-AS1	137.338	-1.27589	0.0470877
NA	64.3974	-1.27354	0.0414526
CXADR	664.91	-1.27303	0.00237956
ATP1A3	184.546	-1.27238	0.000214341
HSPB6	532.375	-1.27171	0.00507779
PPFIBP2	362.375	-1.27086	7.80534e-05
FAM49A	291.85	-1.26918	7.11628e-07
HOTAIRM1	565.817	-1.26771	0.00019187
HOTAIR	130.624	-1.2662	0.000781503
RRAGD	709.4	-1.26607	5.22732e-08
CACNA2D2	102.542	-1.26435	0.0256123
SMIM10L2A	156.829	-1.26385	0.000215842
FICD	291.785	-1.26105	8.88758e-05
BMP7	1074.11	-1.26011	8.57344e-05
TUBE1	352.303	-1.25986	0.000375042
RNF6	460.402	-1.25939	0.00528834
STOM	6287.95	-1.25623	1.15655e-10
CCDC183-AS1	217.612	-1.2553	0.000422992
FAS	134.149	-1.2537	0.0253802
MGAT3	833.348	-1.25238	1.75984e-07
JDP2	803.451	-1.2506	4.8766e-05
MOCOS	466.71	-1.25033	5.19156e-07
CYFIP2	677.634	-1.25002	0.0341211
GPT2	2582.03	-1.24652	5.43903e-06
PLPPR3	207.385	-1.24538	0.024465
CYP2S1	1395.72	-1.24423	0.00102969
RFTN1	2745.34	-1.24354	5.15592e-09
WDR86	554.921	-1.24313	4.99614e-06
NLGN3	86.2156	-1.24245	0.00854478
RIMS4	343.255	-1.24169	0.000736278
EPM2A	131.246	-1.23631	0.000616449
MROH8	106.536	-1.23362	0.0198358
ZNF423	118.959	-1.23325	0.0189947
ANO6	3704.12	-1.23249	3.33589e-07
SLC12A8	106.394	-1.23221	0.00244742
PCDH1	2239.61	-1.23138	0.000998687
NIPAL2	737.186	-1.23125	0.00304447
AC124798.1	183.622	-1.23114	0.000449972
CLDN11	118.388	-1.22985	0.00455102
LINC01638	91.2499	-1.22713	0.0193992
AC209154.1	41.1545	-1.22536	0.0428794
OTUD1	137.392	-1.22324	0.00281491
MIA2	788.998	-1.2232	9.21787e-06
L3HYPDH	496.797	-1.21749	0.00172454
SNTB1	354.71	-1.2165	0.00282114
CA13	146.689	-1.21585	0.000376162
HLA-F-AS1	199.646	-1.21479	0.000338043
BTF3L4	1411.04	-1.21465	8.7205e-12
NEK6	5032.22	-1.21459	8.39098e-07
CCT6B	81.4486	-1.21368	0.00386702
MMP25	80.5914	-1.21294	0.0335721
CGNL1	590.8	-1.20942	1.63462e-07
HK2	1295.42	-1.20624	2.2306e-06
CHST3	728.999	-1.20032	0.000207828
ZFPM2-AS1	248.678	-1.19723	0.0282532
APOL6	2653.29	-1.19557	8.46804e-09
FLNC	13945.4	-1.1941	1.5612e-05
SLC38A3	200.194	-1.19196	0.00408197
NBR2	156.741	-1.18889	0.000809902
CCDC169	181.318	-1.18736	0.000676512
MARVELD3	97.8142	-1.18606	0.00227621
LRATD2	2385.87	-1.18603	1.15113e-05
HINT3	354.063	-1.18434	0.0065303
PNPLA7	140.954	-1.18309	0.00111297
PCMTD1	675.975	-1.18118	0.00620871
RETREG1	231.564	-1.1793	0.0043623
ALPK2	554.557	-1.17871	0.00462259
RNF41	3034.46	-1.17849	0.000658911
ABCG1	1136.94	-1.1784	1.01093e-05
NA	51.0571	-1.17693	0.0262208
IRF5	94.3256	-1.17334	0.0399907
GFI1	64.2029	-1.17161	0.0224539
TIAM1	1833.59	-1.17152	0.000579997
FUOM	494.092	-1.1713	0.00287472
SNX10	282.384	-1.16597	0.0269063
SLC1A5	10261.9	-1.16465	6.9271e-05
LPP	1170.15	-1.16437	0.00623613
EDNRB	705.343	-1.16426	0.000152912
RBPMS2	318.379	-1.16227	0.00156106
SMOX	1750.33	-1.16218	4.25137e-07
ERRFI1	9737.74	-1.16213	3.38652e-09
LATS2	832.141	-1.1617	3.80386e-09
IGFBP3	205.547	-1.16107	2.06363e-05
ARL4D	444.807	-1.16066	0.00561809
SCNN1A	202.297	-1.15892	0.00195164
ADAMTSL4	615.165	-1.15783	8.28798e-06
B4GALT6	373.86	-1.15676	0.00840555
CLCNKB	140.681	-1.15509	0.0164158
TUB	3347.48	-1.15397	2.45297e-12
MORC4	1512.88	-1.15382	1.68355e-06
SLC16A5	241.121	-1.15279	0.00220872
MEIS3P2	152.688	-1.14978	0.00314809
FAM20A	867.697	-1.14917	0.0276232
CSF1	3574.77	-1.1483	0.00186229
AC008514.1	112.253	-1.14636	0.0263996
UHRF1BP1	4685.08	-1.14442	3.18384e-08
CTSS	601.732	-1.14344	0.00100336
TGIF1	1316.8	-1.14242	6.45683e-05
FBXO27	128.634	-1.14222	0.0017207
RTN4	11287.2	-1.14173	1.48995e-11
LMOD1	169.724	-1.1409	0.00450769
AARS1	17487.8	-1.14052	0.000658911
FHOD3	395.444	-1.14001	0.000100071
GOLGA4	903.426	-1.13889	0.0401265
SPART	1833.61	-1.1366	0.000439814
NLRP3	89.3382	-1.13522	0.0177635
RSPO4	338.961	-1.13505	8.72794e-05
SEL1L3	3372.65	-1.13451	6.2352e-11
USP46	912.241	-1.13432	0.0267703
RRN3P3	186.825	-1.13414	0.00134384
KLHL15	346.76	-1.1336	0.0270482
KCNE4	2435.84	-1.13336	1.75753e-09
SMIM10L2B	71.377	-1.13317	0.0261067
EIF4EBP1	4036.89	-1.13179	0.0108645
RFESD	179.726	-1.13103	0.0115032
LMO4	1064.53	-1.13061	0.000241521
AC091806.1	77.5589	-1.12948	0.0161365
SLC25A25	825.208	-1.1293	0.000179519
SERPINB8	251.417	-1.1292	0.0026657
PTK2B	183.512	-1.12538	0.0387171
COX19	441.145	-1.12452	1.14771e-06
TLE2	1438.03	-1.11776	0.00285024
TACC1	3346.16	-1.11705	8.93652e-06
HSPA9	18173.1	-1.11668	2.81193e-06
CELF2	383.492	-1.11496	9.69801e-06
GPR146	124.14	-1.11478	0.0179442
BOD1	1569.58	-1.11247	4.80619e-09
OSMR	12897.5	-1.10933	1.334e-05
SLC31A1	2923.42	-1.10855	1.27788e-11
TMCC3	233.048	-1.10847	0.00259012
DNAJC3	4888.26	-1.10797	0.000163973
ECHDC2	102.409	-1.10621	0.0233461
INPP5B	997.699	-1.10321	8.39755e-06
PDE6B	137.477	-1.10125	0.00639058
GREB1	372.377	-1.09859	1.60588e-05
WDR11	1776.54	-1.09754	3.33492e-06
PIM1	592.38	-1.09639	0.000136432
TNFRSF10B	4287.7	-1.09551	3.23026e-10
BCL2L13	3511.09	-1.0942	7.13894e-08
PLAAT3	1247.19	-1.09366	2.16819e-10
APMAP	11210.8	-1.09319	6.99659e-08
ONECUT2	99.6362	-1.09275	0.0368257
HOXC13-AS	69.8415	-1.09209	0.0211268
MS4A15	112.035	-1.08926	0.0374897
TIMP3	22114.8	-1.08884	3.21992e-09
SLC39A8	337.188	-1.08537	0.00073307
HTRA3	1679.56	-1.08432	0.00327643
HSPA5	35020.7	-1.08327	2.45271e-08
FBXO2	786.343	-1.08072	0.0144759
GPLD1	87.3757	-1.07996	0.0236595
HSPB8	995.542	-1.07943	0.000515051
SARS1	6848.75	-1.07899	0.00358453
DIXDC1	1602.58	-1.07743	3.93147e-06
CILP2	707.444	-1.0745	0.000263982
NFE2L1	19366.2	-1.07318	4.21595e-11
FGF1	151.827	-1.07195	0.0472319
ADAM23	1347.3	-1.07125	6.3396e-07
AIFM3	132.645	-1.07028	0.0243967
LRP3	506.976	-1.06684	0.0379649
GFPT1	2378.23	-1.06587	2.15996e-05
PPM1H	165.263	-1.06556	0.0087165
SRPX2	1205.12	-1.06447	0.00712113
HSPA13	1462.67	-1.06413	0.0274178
SSR3	4239.41	-1.06328	9.04458e-06
DLGAP1-AS1	97.2839	-1.06229	0.0348238
CXCL16	808.38	-1.06099	0.00313828
AL161772.1	117.02	-1.06057	0.0161377
KANK1	2708.54	-1.06043	0.000160575
PXK	600.361	-1.05943	3.86696e-06
SYBU	301.895	-1.05826	0.0074352
LONP1	4386.29	-1.05694	0.00166608
PLTP	8569.58	-1.05403	0.000889692
PTP4A2	6183.21	-1.05378	3.25808e-05
H2BC15	122.605	-1.04815	0.0201283
ZBTB47	575.247	-1.04779	0.00126376
PPP1CB	2781.15	-1.0472	0.0153403
GCLM	854.12	-1.04673	0.00497812
SCN4B	3269.24	-1.04588	0.000104215
ANAPC10	175.964	-1.0457	0.00313814
EDEM1	1690.17	-1.04463	0.000198687
ZDHHC2	783.921	-1.04296	2.44716e-06
IL1RAP	441.344	-1.04221	0.00149595
SH3RF3	778.406	-1.04007	2.21891e-06
AC093525.7	295.721	-1.03915	0.00649306
B3GALNT1	822.278	-1.03903	0.00562789
GABARAPL1	1818.11	-1.03835	6.7518e-09
CLIP1	1643.41	-1.0362	0.00327678
GFPT2	383.332	-1.03547	0.00332573
SLC13A5	154.615	-1.03345	0.0114733
MYO1F	279.113	-1.03292	0.00753006
BLCAP	2651.2	-1.03071	1.994e-07
SSC5D	260.09	-1.0301	0.00729929
FLT1	554.13	-1.02936	0.000371299
HERPUD1	3809.91	-1.02445	0.00167692
SLC22A23	172.753	-1.02355	0.00533344
KIF6	125.84	-1.02344	0.0311202
SLC2A9	136.838	-1.02344	0.00709834
AKNA	1307.84	-1.02277	7.14165e-05
RENBP	344.892	-1.02238	0.00217889
SEMA5A	981.21	-1.02217	0.0155456
IL3RA	127.624	-1.02205	0.0221574
CANX	17658.7	-1.02093	0.000103104
LY6E-DT	106.991	-1.02021	0.0189955
ACE	174.923	-1.01854	0.0241443
DPCD	326.966	-1.01546	0.002625
FAM27E3	333.097	-1.01391	0.0103201
CYS1	67.9139	-1.01217	0.0405749
PLEKHF2	457.69	-1.01154	0.0181883
RAP1GAP	251.381	-1.0113	0.0193992
FEZ1	952.26	-1.01067	0.00777861
FOXF2	225.7	-1.00988	0.000462279
AL109976.1	88.3356	-1.00902	0.0246765
ANKRD46	331.944	-1.00761	0.000556252
ZNF185	2049.84	-1.00716	0.0104784
FGFR1	4328.99	-1.00446	4.87457e-07
YARS1	8082.49	-1.00323	0.00705506
CNST	608.488	-1.00123	3.56813e-05
ULBP3	86.2291	-1.00048	0.0328773
LDLRAD4	148.49	-0.997135	0.035229
SYNE1	1063.22	-0.996516	0.0164063
SLC38A6	288.874	-0.996373	0.00105611
PRKCE	696.77	-0.995229	0.000134365
CD82	947.361	-0.994924	3.58781e-05
FAM89A	582.458	-0.994473	0.000171311
GPR137B	378.585	-0.994336	6.00363e-06
NFIL3	578.836	-0.994231	1.32035e-05
BCAT1	1538.67	-0.993952	0.000467678
E2F5	323.145	-0.99356	0.000684717
HTATSF1P2	174.394	-0.992915	0.0324272
NR4A1	291.914	-0.992211	0.00170361
LRG1	241.651	-0.991725	0.0213514
CFB	730.379	-0.991545	0.00886167
IFIT3	980.62	-0.987454	0.00386702
BEND6	203.866	-0.986095	0.0427517
FBXO25	867.182	-0.985979	0.000131319
FBXO32	454.902	-0.985841	0.00240143
FRRS1	162.507	-0.984639	0.00784705
GRTP1	139.77	-0.983756	0.0096433
ZFAND2A	367	-0.978121	0.000547464
NDRG1	3587.37	-0.976669	0.0128815
PNMA6A	378.449	-0.976184	0.00483907
DHFR2	252.356	-0.973608	0.0192368
MGST1	1910.1	-0.973534	0.00294425
PLCH1	85.8744	-0.97309	0.0319095
CADPS	406.168	-0.972518	0.0193992
CREB3L2	3155.41	-0.971746	0.00460206
USP25	842.155	-0.971363	0.0113364
LINC01597	114.329	-0.970913	0.0282532
NNMT	4540.62	-0.966845	0.00282782
ZBTB7C	420.668	-0.963652	0.0481792
EIF2S2	6421.18	-0.962912	0.0093629
NACC2	1183.71	-0.961654	0.000183614
HOXD8	330.727	-0.961489	0.000118905
MLXIPL	226.976	-0.96145	0.000967169
PRDM5	311.765	-0.96043	0.034636
WRNIP1	2862.42	-0.957659	8.03119e-06
TNRC6C-AS1	971.811	-0.956252	5.46663e-06
TMEM205	1649.97	-0.956179	0.0180318
GSR	3507.55	-0.955452	0.00114127
UFM1	845.358	-0.954926	0.00311231
CGB7	81.4259	-0.95398	0.0343524
CYP11A1	166.638	-0.952617	0.0354069
ELOVL5	4357.03	-0.952569	2.09856e-05
JCAD	4883.05	-0.9504	0.000766755
SMIM3	455.138	-0.948306	0.000150424
GLDN	202.843	-0.947627	0.00199861
JMJD7	246.867	-0.946873	0.00911677
ITGB3	1006.78	-0.945874	0.00695177
PVR	3084.66	-0.945855	0.000328879
GHITM	3135.9	-0.944058	3.11224e-08
DCAF10	1264.43	-0.941248	0.00352216
C1R	6192.9	-0.940333	0.00022841
SYTL1	178.51	-0.939601	0.00363877
AC010186.2	165.693	-0.9396	0.0395161
MAP1LC3B	4631.94	-0.939192	4.00306e-07
HSFX1	119.54	-0.938622	0.0234692
NA	244.388	-0.937853	0.0123161
SPRYD7	423.506	-0.937116	7.33027e-05
CADM4	1090.91	-0.937075	0.00500969
SUSD1	1177.64	-0.936055	6.69118e-06
ZFAND3	5312.41	-0.932934	0.0068375
BMP8B	107.106	-0.932446	0.0236883
AC009779.3	374.302	-0.932309	0.000440523
ARHGEF2	8115.64	-0.930454	0.00186569
UEVLD	487.333	-0.930081	0.00728131
NFE2L2	3266.74	-0.927776	0.0136847
SERP1	2983.21	-0.927501	1.14054e-05
VPS37A	838.447	-0.926516	0.00134687
MIR22HG	615.09	-0.92614	0.00223032
LZTFL1	614.825	-0.925507	0.0242344
U2AF1L5	1276.32	-0.924372	0.0198236
AC005747.1	1584.85	-0.923963	0.0177843
MYOF	6782.68	-0.923559	1.19963e-06
WTIP	835.82	-0.923068	0.0478441
FZD7	2426.88	-0.920385	9.69801e-06
SEPHS2	3631.64	-0.920025	8.46804e-09
ALDH1L1	429.926	-0.918661	0.0426909
PECR	326.389	-0.914212	0.00148515
NOTCH2	10974.4	-0.912745	3.2888e-08
LYN	569.353	-0.911198	1.44342e-05
CYBRD1	4847.84	-0.909578	2.12796e-05
NA	146.07	-0.909338	0.0419404
CCN2	1299.1	-0.906786	0.00240143
NEO1	8132.46	-0.906567	7.42675e-07
HLA-F	932.716	-0.906305	0.0359891
RNF187	4868.54	-0.905561	0.0253802
RAB3D	604.149	-0.905293	0.00947818
VLDLR	919.552	-0.905037	0.0200325
AC093525.6	150.78	-0.904219	0.0358189
AC092111.1	109.999	-0.90376	0.032655
GTPBP2	3164.19	-0.903618	4.59395e-07
SCUBE3	1203.02	-0.901865	7.30039e-05
PPP1R15B	2107.22	-0.900994	2.7057e-06
HOXC8	360.423	-0.900356	0.000868817
PROSER1	1071	-0.899223	0.000839697
SERPINB9	1898.8	-0.897234	0.0026449
TAOK3	676.154	-0.89706	0.00220845
CSPG4	1490.06	-0.895726	0.000407588
THAP9-AS1	444.985	-0.89522	0.042557
EAF1	1137.66	-0.894976	1.07912e-06
CTBS	649.864	-0.894128	7.78768e-05
CDKN2B	1300.41	-0.893883	0.00500969
ELOA-AS1	96.4555	-0.892043	0.0271058
MPHOSPH8	942.899	-0.892039	0.00272818
MVB12B	548.985	-0.89193	0.000776009
RAB17	2417.11	-0.891423	0.00021288
SMPDL3B	276.597	-0.890953	0.0374091
SHANK1	100.47	-0.888656	0.0352267
VSTM4	424.56	-0.885761	0.014902
ECHDC3	206.823	-0.885458	0.0273491
TMEM192	1249.27	-0.885047	0.000178867
SLC22A17	1063.06	-0.884926	0.0275583
NINJ2-AS1	175.443	-0.884516	0.0133184
RBM47	207.762	-0.884485	0.0248931
WIPI1	1461.82	-0.884305	7.99918e-05
SLC8A3	646.563	-0.883412	0.0250589
RRAS2	1204.17	-0.881403	0.000538862
CLEC11A	911.427	-0.879434	0.0273267
CPAMD8	112.64	-0.877113	0.0499306
P2RX5	297.85	-0.87691	0.0185726
AVPI1	262.818	-0.876847	0.0151535
OSTM1	795.674	-0.875481	0.0236883
CYLD	1096.69	-0.87515	0.006019
P4HA1	1751.35	-0.873989	0.0141156
PSMD5	1813.39	-0.873606	0.000113273
NKX3-1	1271.4	-0.873565	0.047794
FAM160B1	505.306	-0.872752	0.0382344
OPTN	2294.98	-0.870686	0.000203784
CBS	4683.51	-0.869976	0.00655605
MAN2B2	2090.53	-0.868643	2.08335e-06
MTRR	1795.57	-0.868366	0.000826076
SLC23A2	3490.51	-0.868012	6.64794e-05
DUSP5	781.164	-0.864543	0.00396857
RAB11FIP1	1837.87	-0.863823	2.76259e-05
P2RX6	882.919	-0.863701	0.000470435
ZNF77	326.658	-0.863539	0.00195811
GCLC	1518.52	-0.862799	0.0224053
ZNF275	1426.77	-0.861569	1.30129e-05
NA	593.295	-0.859294	0.0340063
TEAD1	7750.83	-0.857847	0.0232224
FAM43A	435.349	-0.856197	0.0121406
SAT1	1942.91	-0.856012	0.00329213
SLC25A32	858.087	-0.854522	0.00401365
TGFBR3	1281.09	-0.854048	0.0178414
RAB6A	3422.66	-0.854028	4.28419e-05
SHC2	989.203	-0.852636	0.00741434
HYOU1	22108	-0.852341	2.09856e-05
MIA3	1916.86	-0.851983	0.0232413
CDH13	6898.93	-0.8512	0.000365294
PPARA	1418.92	-0.850504	0.00140075
B4GALT4	856.834	-0.850221	3.69119e-06
MSRB3	1296.94	-0.849822	0.0007338
DPYSL2	4597.52	-0.847597	8.49479e-09
LINC00963	2402.66	-0.846988	0.00321199
PEG3	5782.58	-0.846988	0.0472327
NSMAF	1541.8	-0.845193	1.61914e-05
MACROH2A2	383.624	-0.843814	0.0237347
ATXN7L1	447.916	-0.84257	0.000121516
ID2	813.717	-0.8401	0.00114638
UBE2W	543.623	-0.839612	0.009211
ARSB	1622.33	-0.839578	3.9379e-05
MAPRE3	962.193	-0.838961	0.0188327
AC009093.1	277.446	-0.838934	0.0385623
MATN3	349.049	-0.83874	0.0321174
CLTB	1357.41	-0.838038	0.0449085
CABP4	277.418	-0.838021	0.00656137
CHMP2B	649.462	-0.83221	0.0138742
FKBP14	1401.49	-0.831556	0.0351135
ZNF337-AS1	201.224	-0.83046	0.0338728
RASA4	1940.62	-0.830088	0.00313298
CHST15	1217.11	-0.827817	0.0365031
SH3KBP1	5138.82	-0.827511	0.00874142
ADAL	234.261	-0.826402	0.0186681
KRT8P12	211.894	-0.824696	0.0394241
NAB2	1240.36	-0.82317	0.00495856
SRXN1	3341.36	-0.822146	0.00167244
LINC00189	134.095	-0.82141	0.0192368
GPAT3	482.036	-0.821343	0.0265741
AEBP1	10647.4	-0.820953	0.000282581
RAB2A	2397.52	-0.819962	2.29506e-06
SPRED1	1784.15	-0.818115	0.00310496
APOL2	1747.16	-0.817676	5.26894e-05
TNFSF10	741.135	-0.816672	0.0164158
HLA-B	14801.5	-0.815817	0.0489211
TCN2	1754.45	-0.813883	0.0172004
CTSD	18643.9	-0.813843	0.0274178
C8orf31	371.012	-0.813784	0.00938715
ADCY9	1009.53	-0.811944	0.00412729
INSR	712.547	-0.809473	0.0429588
LAMP2	6900.52	-0.808887	1.86128e-06
DTWD2	224.038	-0.808832	0.0232161
RCAN1	2110.64	-0.808416	0.00022596
DZIP1	4112.39	-0.807667	0.00556316
MMP11	939.997	-0.807444	0.0126282
Z97192.2	186.882	-0.807025	0.0331285
EID2	469.221	-0.804437	0.00046384
PSPH	3433.29	-0.801808	0.00251731
ZBTB25	459.09	-0.800049	0.0202545
PIGBOS1	267.124	-0.799797	0.00352618
ZNF397	499.063	-0.79818	0.00446217
BHLHE40	1130.83	-0.797875	0.00690117
ACSL1	544.794	-0.797653	0.000259883
SORL1	3282.74	-0.796963	0.0074438
PDGFRB	9170.63	-0.796549	0.0158839
KLHL21	2254.86	-0.795581	0.0360977
RAMAC	952.556	-0.7948	0.00076514
SMAD7	373.741	-0.793524	0.0359512
OSGIN2	427.015	-0.792248	0.0380591
ANKRD6	571.002	-0.789033	0.00436461
TMEM39A	1064.03	-0.788767	0.00147919
WHAMM	510.23	-0.788519	0.010839
AJUBA	4175.48	-0.787291	8.72794e-05
ST3GAL1	3447.74	-0.787273	0.0445026
SLC9A1	1234.93	-0.787072	0.0201283
RAB9A	746.098	-0.786947	0.000974783
LACTB2	401.358	-0.785565	0.0100312
H2BC18	255.396	-0.784919	0.00320722
DUSP4	6641.66	-0.783976	7.13171e-05
ZCCHC8	685.867	-0.782804	0.0317067
SLC16A1	2905.27	-0.782652	0.00275435
GNE	3388.71	-0.782239	0.000926471
ARHGEF37	355.952	-0.781831	0.00571512
TXNIP	25142.5	-0.781097	0.00159828
NRAS	2540.58	-0.780489	0.0115032
LYSMD2	252.553	-0.779335	0.00465825
FBXO45	680.849	-0.779087	0.021888
CCDC71L	826.024	-0.777933	0.00679889
SLC33A1	1140.74	-0.777597	0.00071384
RPP25	978.819	-0.776532	0.0405915
PLA2R1	742.295	-0.77547	0.0417241
OGT	11752.1	-0.775202	0.0495088
TMX4	4047.81	-0.775179	0.00244061
RNF11	2297.22	-0.774498	0.000267404
CCDC9B	1088.35	-0.77377	0.0358189
SLC43A1	1132.98	-0.771601	0.0337236
SLC25A33	436.997	-0.770927	0.0159816
ABHD4	4091.69	-0.770199	0.0448376
BACE2	2236.71	-0.769946	0.0177714
PLEKHB2	3175.57	-0.768105	2.39681e-05
GRB10	3289.82	-0.76418	0.00106493
PCSK5	821.715	-0.76407	0.0419404
LINC02762	200.052	-0.763309	0.023961
CAPZA1	3116.87	-0.763147	0.047656
PIP4P2	557.733	-0.763067	0.00763035
IL27RA	1894.64	-0.762637	0.012093
LGALS8	1350.04	-0.7622	0.00641573
BPGM	558.166	-0.760652	0.00164625
MPZ	254.573	-0.760467	0.00659703
DNAL1	501.404	-0.759773	0.0399228
ZFP41	1078.11	-0.759768	0.0141883
DNASE2	3008.59	-0.757705	0.0170429
TSTD2	1544.23	-0.757568	0.000238232
UBE2J1	2007.85	-0.757246	0.00194548
BMERB1	615.738	-0.756513	0.00295532
SQSTM1	11191.9	-0.754828	0.0483468
RAB27A	560.732	-0.753778	0.0402352
PGM3	1452.4	-0.753695	0.0253802
ZBTB7B	881.926	-0.753182	0.0467395
ATF4	12142.4	-0.750802	0.0134984
RTN3	6447.76	-0.749159	0.00216281
NUDT7	145.907	-0.748205	0.0399228
ATP11A	1484.68	-0.74786	0.0330686
SEC63	1514.13	-0.747227	0.0297365
YIPF4	1528.15	-0.746886	0.0359891
PLCG2	544.518	-0.746639	0.0350232
ATP6V1H	1478.58	-0.746529	0.00179869
NOMO2	7956.69	-0.745761	0.00150228
ITPRIPL2	2514.32	-0.743773	0.00145271
AL031587.5	360.319	-0.742041	0.00144177
DYRK1A	1806.29	-0.741691	0.00914143
ZFYVE28	236.893	-0.741556	0.0450982
TMEM126B	868.016	-0.741273	0.0258421
CARS1	6654.53	-0.741004	0.0258276
TUSC1	271.76	-0.740349	0.0477234
IER3IP1	554.843	-0.737039	0.0281217
ROR2	1191.75	-0.734332	0.0245633
AMIGO2	417.07	-0.733779	0.0389898
BCOR	2324.48	-0.73375	0.00174931
QKI	3704.45	-0.732942	0.0119261
ARHGEF35-AS1	686.854	-0.732622	0.0066405
SLC38A7	1262.79	-0.732153	0.000784258
RBCK1	6374.26	-0.731741	0.0196737
CTSL	3889.94	-0.730371	2.68422e-05
SH3GLB1	2130.7	-0.728322	0.0018538
DDR1	5170.11	-0.727534	0.0244074
SMO	4043.44	-0.725945	0.0290918
TFRC	7486.03	-0.724655	0.034636
P4HA2	2433	-0.721991	0.00127704
SOAT1	1224.83	-0.718918	0.00596032
ALDH5A1	1573.85	-0.717716	0.000481178
CCZ1	4084.97	-0.717411	8.09797e-06
ACP5	1630.43	-0.71736	0.0461251
SLC48A1	1026.41	-0.716381	0.0359752
RRN3	1929.18	-0.7139	0.0160703
B2M	18655.5	-0.711593	0.000189369
KDM7A-DT	214.152	-0.711569	0.0302382
ZNF800	651.579	-0.71126	0.0423101
CCDC174	577.948	-0.71077	0.000736761
MTDH	3774.79	-0.710702	0.0358189
ZFYVE9	1619.38	-0.710435	0.00138259
ARHGEF12	8563	-0.70996	0.0380591
ZBTB2	539.882	-0.709667	0.0271058
ETV5	3213.78	-0.709615	0.0199458
KDSR	2071.36	-0.708223	1.60588e-05
CASP4	1776.8	-0.708018	0.00144925
PEA15	7147.47	-0.707394	0.0441463
ZNF252P	1043.66	-0.707329	0.0484408
HLCS	1694.6	-0.705786	0.000229018
FOXN3	2583.55	-0.70443	0.00839207
ARG2	1004.62	-0.704257	0.00364252
DNAJA3	1420.12	-0.701152	0.0233185
TOM1L1	622.707	-0.700842	0.0419425
CAMK2N1	1029.19	-0.70074	0.00122987
CDK18	1145.56	-0.700072	0.0280074
SLC66A3	390.579	-0.699612	0.020854
TBC1D20	3573.36	-0.699194	0.00590518
GLIS2	732.964	-0.698126	0.0280074
SLC39A1	5115.14	-0.697965	0.043507
EPB41	1722.95	-0.696938	6.21717e-05
GPALPP1	1003.9	-0.696362	0.0253802
SDCCAG8	362.261	-0.695399	0.0371694
KAZN	1327.24	-0.695273	0.00751837
IGF2R	7293.84	-0.693887	0.0311039
RASA4B	725.446	-0.693364	0.0476947
FAM241B	182.751	-0.69018	0.0417381
SMARCD3	1523.98	-0.689336	0.0399497
ZNF419	500.263	-0.688632	0.0320775
SLC7A6	1911.42	-0.688027	0.000799612
ATF6	2603.57	-0.685962	0.00274648
ANKRD11	7172.51	-0.685576	0.00709834
SLC25A37	4433.41	-0.685438	0.019725
FOXF1	653.502	-0.684737	0.0333222
SERPINH1	44687.6	-0.683749	0.0318764
VAPA	3213.76	-0.683541	4.33995e-05
MXRA7	4517.97	-0.683271	0.0253816
SNAI2	647.449	-0.682721	0.00467363
SNHG17	1150.78	-0.682329	0.0440537
LYPLAL1	307.338	-0.681953	0.0213595
EDA	1105.59	-0.675993	0.0247062
FLYWCH1	2155.73	-0.67582	0.00358367
GADD45A	696.633	-0.675204	0.000255699
AC090204.1	301.436	-0.671717	0.022382
C1orf109	789.355	-0.671406	0.030239
RALGAPA2	4114.45	-0.670988	0.00258947
PPP1R26	1504.2	-0.670571	0.0155456
EMC1	6063.57	-0.668815	0.0067503
FSTL3	904.217	-0.667414	0.0359185
PLXNB2	10284.5	-0.666942	0.014666
OSBPL6	428.405	-0.666376	0.0226617
EXOSC8	617.92	-0.66572	0.0350232
SORT1	4465.66	-0.664953	4.91238e-05
GBA	3495.3	-0.661955	0.0118483
SLC9A8	1366.58	-0.660284	0.00153599
SLC12A7	1349.31	-0.658803	0.0140458
DIS3L	1676.57	-0.658579	0.00328292
ADH5	5767.06	-0.658518	0.0142192
RNF103	608.608	-0.656903	0.0239763
SLC20A1	1975.49	-0.653605	0.022221
PACSIN2	3584.98	-0.653034	0.0102796
PSAP	42084.7	-0.651641	0.00944067
LTK	483.751	-0.647743	0.0403785
ARHGEF10L	587.439	-0.646115	0.0401265
CNTNAP1	3128.91	-0.645329	0.0192368
TMEM268	1130.82	-0.644437	0.0178405
KREMEN1	2651.56	-0.641806	0.00692687
ATXN1L	2694.19	-0.639332	0.000693606
ATXN2L	6566.03	-0.639099	0.0194683
AEN	964.156	-0.638623	0.0467067
PRXL2A	2239.03	-0.637635	0.00429908
COG3	1248.34	-0.635739	0.0201283
RAP1B	4896.65	-0.634854	0.0107044
LINC02693	1499.98	-0.634483	0.0038144
FAM220A	925.614	-0.6325	0.00423817
TLCD2	1227.09	-0.632193	0.0303522
FOPNL	882.288	-0.630975	0.0161284
RNF145	6507.17	-0.627974	0.00552689
SLC2A10	1961.93	-0.626138	0.00315548
MICALL1	2377.36	-0.625495	0.039165
SIRT5	600.446	-0.625169	0.0310316
ACTR2	7993.3	-0.624921	0.0389898
LAMP1	5710.68	-0.624253	0.0124783
CIDECP1	337.972	-0.623724	0.0299602
RANBP9	1628.7	-0.62342	0.0127311
LYRM1	516.587	-0.623264	0.00856946
ERLIN2	3194.77	-0.622507	0.001181
WNK1	7634.19	-0.622255	0.0117414
YIPF6	1449.42	-0.621491	0.0460175
CREG1	2103.45	-0.620231	0.00413374
SEC61A1	16822.7	-0.619773	0.024713
RASSF3	2888.07	-0.619754	0.0311202
ITGA11	6909.09	-0.618206	0.00851797
PNMA2	2251.69	-0.617487	0.000862295
CLN8	851.901	-0.617213	0.00580078
DERL1	2273.3	-0.615507	0.00933833
AP000769.1	590.188	-0.613827	0.032146
CCDC59	343.575	-0.613541	0.0487012
ASB7	694.151	-0.612207	0.0152178
TSEN15	1119.64	-0.611873	0.0170479
SFMBT1	532.779	-0.609799	0.0266004
ZNF717	415.354	-0.609103	0.0399228
GCC1	1698	-0.608948	0.000775983
PNMA8A	2206.06	-0.608127	0.00346616
FBXO10	1236.24	-0.602687	0.0192368
DCUN1D2	474.995	-0.60261	0.00951532
CDR2	892.606	-0.602224	0.0157954
CES2	4012.48	-0.598332	0.0115032
RIOK3	1472.64	-0.598274	0.0355911
SNX9	1068.08	-0.597995	0.00288946
AAK1	1594.69	-0.596842	0.021888
SEC11C	377.626	-0.595632	0.0200726
NIPAL3	1462.77	-0.595087	0.00358574
ANAPC16	1609.37	-0.594754	0.000220886
VHL	2326.28	-0.59293	0.00293629
MID2	500.769	-0.590398	0.0237191
MX2	6002.28	-0.590099	0.00890158
NOMO1	10117.4	-0.589374	0.00612429
TLN2	1516.78	-0.588352	0.0418724
MCPH1	825.545	-0.588143	0.00782769
ITM2B	32746.2	-0.588123	0.0322004
SMIM19	672.203	-0.587525	0.030206
ALG2	1482.15	-0.586732	0.0206591
BUD31	2961.44	-0.583728	0.0432588
PARN	1790.17	-0.583272	0.00519009
EIF3M	6696.31	-0.582859	0.00267843
CECR7	1146.19	-0.579615	0.00300129
ATP6V1G1	1720.85	-0.578078	0.0214068
GTF3A	1623.23	-0.574666	0.0179442
MSANTD3	939.182	-0.56932	0.00605946
LAPTM4B	13194.1	-0.567717	0.000238232
ERP44	2563.84	-0.565784	0.00165405
CALU	17273.3	-0.565508	0.0299211
PIR	1734.32	-0.564213	0.0161377
ALG5	536.759	-0.563905	0.0389316
RAB31	1775.62	-0.562663	0.00751353
PHYH	756.579	-0.562586	0.0152041
ARHGEF3	739.775	-0.560521	0.039165
PMS2	1322.43	-0.560359	0.0119803
URI1	1854.3	-0.560152	0.0484219
NXPE3	1603.01	-0.557419	0.02564
METTL21A	573.621	-0.557304	0.0239763
ORC5	928.234	-0.556791	0.0397802
NRIP3	978.763	-0.555969	0.0104784
CYP2U1	890.114	-0.551071	0.0399907
UNKL	634.321	-0.549742	0.0307772
TLK2	1397.36	-0.546796	0.0440537
PRKAB2	748.451	-0.546762	0.044608
FNDC3B	3731.16	-0.546185	0.0281217
GRK5	663.216	-0.545124	0.0414526
POLR3C	1159.74	-0.542566	0.0424748
CHPT1	729.274	-0.542517	0.0110698
ASAH1	2469.97	-0.5418	0.0374218
ARMC10	1673.69	-0.541617	0.0088512
ATP6V1E1	2544.15	-0.540175	0.0067256
SCRN1	9474.25	-0.540103	0.000451801
DNAJC1	590.29	-0.540051	0.0197869
LGALS3	3060.71	-0.540043	0.0344025
TANGO2	848.518	-0.539424	0.0408581
CCZ1B	1079.03	-0.539333	0.0269954
C8orf76	792.408	-0.539009	0.0105354
RTF2	4579.63	-0.538525	0.0330686
ARHGAP35	7016.38	-0.537997	0.00174269
SIAE	1096.05	-0.535568	0.0306268
LRRC8D	2161.38	-0.534327	0.0123889
ZNF330	715.734	-0.531091	0.0253816
RRP1B	2247.33	-0.530174	0.00384546
SLC39A7	8697.59	-0.529074	0.0078735
F8	487.46	-0.52904	0.0459287
PHYKPL	1073.17	-0.528752	0.0385554
CHCHD3	2162.65	-0.525656	0.0194783
PARP6	1393.11	-0.52474	0.0411848
NPC1	1877.43	-0.523344	0.0417241
MAN2A2	3634.91	-0.522959	0.0380591
RAD23B	6322.41	-0.521589	0.0177649
TMEM70	628.806	-0.509939	0.0266359
CSNK1A1	4221.06	-0.50747	0.0157692
SMARCA2	3313.35	-0.504707	0.0401265
DCAF8	3453.82	-0.503783	0.00548463
EIF5	5825.51	-0.501385	0.0171231
KCTD15	2916.53	-0.49864	0.0329551
CELSR1	2693.18	-0.498504	0.0422251
PIP4K2B	5568.07	-0.495346	0.0105053
SCD	22515.2	-0.490713	0.00500969
ZNF410	1915.11	-0.490188	0.0489776
TNKS	3181.67	-0.487046	0.01988
PIEZO1	7475.94	-0.486253	0.0358189
TBRG1	1955.84	-0.4806	0.0107484
IQSEC1	1440.26	-0.479433	0.0381566
ATXN10	3777.64	-0.47678	0.00917918
PDXDC1	3760.63	-0.466885	0.0124783
KLHDC10	3050.92	-0.465102	0.00862825
MRPS10	1837.93	-0.4651	0.0452452
PATL1	2794.93	-0.451643	0.0168466
H2AZ1	5314.14	-0.44828	0.0182822
KIF7	1250.87	-0.446097	0.0399228
NFATC3	2007.75	-0.444428	0.0162089
SCPEP1	3627.89	-0.429592	0.0212174
MYLIP	1335.04	-0.423709	0.0324037
FKBP15	2214.31	-0.42304	0.043507
GOLGA7	1766.64	-0.417472	0.0359752
KCTD20	5122.62	-0.416717	0.0357789
PHACTR4	2307.74	-0.399748	0.0498566
MORC2	1814.95	0.414079	0.0292881
PABPN1	4834.47	0.414272	0.044608
SH2B1	2610.11	0.4151	0.0467067
CTNND1	14241	0.422184	0.0173353
LDB2	3456.83	0.428562	0.0379193
CDK5RAP3	2755.41	0.42992	0.0379507
NPEPPS	6373.51	0.442328	0.009211
ATP1A1	24994.7	0.442358	0.0360078
NUMA1	14412.3	0.442566	0.0410404
NUP155	3807.17	0.443011	0.0359891
H3-3A	11230.8	0.446431	0.0156353
SHROOM3	1967.8	0.447424	0.0245599
TSC22D1	6340.18	0.450366	0.00729929
CUL9	2458.87	0.453078	0.0478441
VASH1	4048.57	0.454945	0.047794
MAU2	2342.49	0.455957	0.0427356
MAPK1IP1L	3398.8	0.456668	0.0179442
EXOSC10	2322.81	0.457108	0.0183647
HDAC6	2275.94	0.459349	0.0277805
KDM3B	8155.76	0.467486	0.0107426
ANTXR1	8957.9	0.475578	0.00272085
RAI1	3185.39	0.47744	0.036878
AP1G2	2230.23	0.478493	0.0358993
GBA2	2131.45	0.479245	0.0291509
KPNB1	16026.6	0.480068	0.00920279
KRI1	1287.94	0.481075	0.0193564
CAPN2	6185.16	0.483365	0.0387659
SH3PXD2A	2357.39	0.488386	0.0407214
METTL17	2013.44	0.488991	0.0305193
MAPRE1	6964.39	0.494768	0.0116046
HEXIM1	2134.99	0.496097	0.00531721
ETS1	5865.97	0.503978	0.0493322
FAM214B	791.098	0.505096	0.0195894
COQ10A	575.995	0.506346	0.0410404
SMYD4	924.028	0.508066	0.0281756
MCMBP	1342.56	0.510609	0.0273491
CHD8	5085.88	0.513296	0.0271058
CHD3	7809.79	0.513762	0.0472924
EHBP1L1	3646.08	0.515442	0.0158839
TPM4	10462.4	0.515634	0.00487701
ITPRIPL1	572.25	0.517024	0.0397741
DMAP1	1254.8	0.517465	0.0328913
NDUFA12	1012.13	0.518618	0.0216978
FBXL5	1089.26	0.518666	0.034636
KHDRBS1	6415.01	0.518896	0.00308221
CA5B	628.05	0.522512	0.0418168
PYGL	2413.36	0.525248	0.00985305
KIFAP3	771.69	0.527895	0.0168415
EIF4B	18514	0.529678	0.0067503
BUB3	2721.19	0.531047	0.0206881
MDC1	2179.2	0.531954	0.0406601
NA	1867.3	0.534364	0.00512254
RCAN3	994.134	0.539055	0.0291515
AREL1	3038.53	0.543165	0.00591965
AMDHD2	1021.71	0.547129	0.0299211
AC090114.2	956.925	0.547917	0.0417881
STAT6	4933.49	0.548068	0.034636
SEPTIN8	5770.52	0.55049	0.00175888
CYB5D1	439.295	0.556319	0.0484219
CNN3	7446.69	0.556507	0.00177139
TOM1L2	3366.41	0.556855	0.00996374
MCM3	5984.23	0.5578	0.0167987
SREBF2	9224.33	0.558044	0.0360371
PMP22	3961.07	0.558897	0.0200992
CORO2A	634.127	0.559468	0.0134984
A2M	6435.55	0.559746	0.0225983
TSPY26P	1099.42	0.560932	0.0275638
CCDC80	3000.48	0.560958	0.0358452
THYN1	1166.43	0.561095	0.00654019
LSM3	801.452	0.561254	0.0327851
TRERF1	1311.06	0.561393	0.0244362
PRMT2	2878.36	0.561415	0.0108114
MCM6	2777.86	0.564623	0.0171521
TMEM14A	516.466	0.564945	0.0331095
ST3GAL5	2937.74	0.566998	0.0101867
TTF2	1043.48	0.571525	0.0413918
RMI2	750.938	0.576224	0.0242344
HARS2	1505.04	0.577384	0.00657009
TMSB4X	22419.2	0.579063	0.0151336
MT-CO3	150653	0.579665	0.0215632
TUBGCP6	1981.39	0.580403	0.0275583
RTL5	1631.72	0.583667	0.0269882
NRDE2	820.712	0.584736	0.0117727
SOGA1	5124.63	0.584871	0.00112142
RFX5	2789.31	0.585881	0.00775028
ATP1B1	8373.74	0.590642	0.0183788
CTBP1	3409.99	0.59294	0.0476975
IK	2894.71	0.593874	0.0476975
C11orf95	1489.69	0.595944	0.00763035
GAS8	967.576	0.598136	0.0374618
PFDN1	1449.01	0.598329	0.0120427
PAICS	6110.47	0.600466	0.00902331
SRSF2	5558.87	0.601361	0.00117068
AFAP1L1	1079.93	0.603485	0.0175913
PDE6D	688.833	0.60393	0.0240976
TCAF1	4294.13	0.604958	0.0243598
SCN5A	481.424	0.605231	0.026402
KDM1B	776.43	0.60699	0.0171231
HARS1	2788.23	0.607428	0.02337
USP13	956.407	0.607781	0.0274635
METTL3	2387.8	0.60827	0.00286292
BTBD11	575.156	0.611073	0.0143828
SEPTIN6	2273.65	0.611683	0.0333129
NARF	2104.87	0.611726	0.0270482
LRCH4	1416.34	0.611975	0.0363709
MICAL1	1145.34	0.612173	0.0140313
TSPYL1	1665.97	0.614862	0.0267002
TPM3	11466	0.617207	0.0357951
DHRS1	523.67	0.618696	0.0291395
RFC5	844.72	0.620391	0.0225075
EVL	1491.31	0.620776	0.0371164
SEC14L1	9425.8	0.622212	0.0096433
DHX8	4546	0.624051	0.0395891
EMP1	1530.92	0.627132	0.0283348
CASC3	3462.81	0.63011	0.00917676
RPL36AL	1687.9	0.630924	0.00911608
DELE1	2677.54	0.631409	0.0253802
YWHAH	2302.04	0.632283	0.00673343
CBX2	2085.65	0.633712	0.0452525
CKLF	759.803	0.634472	0.00700496
CEP68	1087.72	0.634709	0.0169569
VAMP2	1194.39	0.635689	0.00090442
TRMT2A	1566.79	0.637188	0.0244362
CMTM3	4578.72	0.637844	0.0335721
TRIM34	350.087	0.638604	0.0244581
FAM168A	5326.82	0.640612	0.00223962
OAS3	3075.27	0.644223	0.0363812
LAP3	1505.25	0.644439	0.0121406
NES	4268.85	0.645217	0.0126282
TRIO	6016.65	0.645804	0.0370906
TCEAL1	410.138	0.647228	0.0146788
SKP2	2720.29	0.648235	0.0122441
TDRKH	630.885	0.648403	0.00734724
SYNRG	2755.67	0.648479	0.000676512
RPA1	5048.26	0.648701	0.0132902
SUMO2	6109.46	0.649412	3.24726e-05
FAM171A1	1275.66	0.650001	0.0166187
DLK1	1403.99	0.650862	0.0354244
ZSWIM8	3621.23	0.653393	0.00440235
CPOX	694.235	0.654532	0.00919617
PHRF1	2751.34	0.655229	0.0185933
PHF20	2117.37	0.656868	0.000721305
H2AZ2	4242.5	0.657926	0.016309
DCK	423.85	0.658564	0.0411052
CAV1	5591.1	0.658804	0.0407167
ACTL6A	1555.75	0.660107	0.009211
RAN	8091.93	0.661183	0.0179789
NUP188	4075.38	0.662092	0.010504
PHLDB1	6083.7	0.662807	0.0240927
MYO9B	4691.59	0.665529	0.00262563
PSME2	4195.38	0.666027	0.0491212
TAF7	2178.72	0.667366	0.00155438
TADA2A	750.986	0.668228	0.000903988
USP35	591.227	0.670147	0.0194863
VIT	857.757	0.670696	0.00195811
F11R	1576.26	0.672014	0.00511258
GALNT11	1545.47	0.672149	0.000617502
PIGU	1035.97	0.67223	0.0271088
WDR70	2095.42	0.674164	2.8541e-05
TTC5	723.047	0.677355	0.0327851
ARHGEF17	8205.88	0.680816	0.00259889
IFFO2	1721.11	0.681472	0.0324613
SFRP1	9640.65	0.681921	0.000304491
STRADA	838.725	0.681966	0.00327643
DENND2A	1640.76	0.68423	0.0224539
CAPN5	2680.59	0.684998	0.0311039
SREBF1	4402.45	0.685917	0.00292918
SLFN11	1758.72	0.686691	0.0205701
NCALD	684.779	0.688631	0.0275583
GLIPR1	542.462	0.68876	0.0062575
JADE2	2152.74	0.689633	0.0101558
LBR	1724.66	0.690344	0.0417241
ATXN7L2	308.172	0.690692	0.0427529
RCC1	3367.9	0.692221	0.0385192
CCT3	8590.58	0.693298	0.0388504
HNRNPM	5459.17	0.693374	9.86874e-05
POP1	794.415	0.693385	0.011465
NRP2	1479.89	0.695272	0.0362661
H2BC5	713.077	0.69602	0.00687867
MANSC1	816.349	0.696579	0.0030971
NPHP4	568.1	0.69733	0.025844
DSN1	913.932	0.698123	0.028629
NEDD8	4041.8	0.699871	0.0102796
FMC1	486.961	0.699947	0.0436433
TGM2	17838	0.700389	0.0462754
CCDC84	388.428	0.700729	0.00742034
DIAPH1	5330.07	0.700906	0.0116046
YWHAQ	9481.78	0.701182	0.000228319
GLI3	3570.51	0.70168	0.00225131
TANC2	3631.81	0.701992	0.0030447
IQCA1	350.482	0.702525	0.00448629
DAXX	4260.83	0.703419	0.0143192
TYK2	3370.56	0.703445	0.0187786
NEURL4	1617.05	0.704274	0.000519788
PCGF3	1263.21	0.705036	0.000407588
PTMA	19341.4	0.705149	0.0262208
TUBGCP2	1927.87	0.705425	0.0349278
CETN2	1537.03	0.705826	0.0188482
OGDH	5609.02	0.706044	0.0385457
GIT1	2730.63	0.707185	0.0299676
RBBP7	5140.29	0.707667	0.000518602
UFC1	1609.49	0.709099	0.0011813
ATAT1	523.131	0.713342	0.000998687
NPEPPSP1	236.642	0.714209	0.034636
REEP5	3296.04	0.714752	0.0123553
FANCI	2015.58	0.71657	0.00592551
BCAS3	1286.77	0.717606	0.0193136
CALM1	3861.5	0.718253	0.000139442
CDC25B	8524.31	0.719667	0.0450982
PPIA	45502.8	0.719819	0.0326239
RPA3	964.64	0.723402	0.00230749
MARCKSL1	10497	0.723879	0.00973961
METAP1	1595.73	0.72779	0.000998687
CCDC88C	725.446	0.72912	0.0372127
MANEAL	1557.54	0.731429	0.0326673
SIPA1L2	1388.58	0.733342	0.0385752
TRO	3525.1	0.734975	0.0180007
HSBP1	7625.36	0.736086	0.00147323
CPNE2	2727.35	0.736997	0.0491374
MFSD10	1932.58	0.738081	0.00578304
GAK	1822.57	0.738413	0.0192312
SLC25A42	645.69	0.738637	0.0353817
SHOX2	318.781	0.739648	0.0237491
HDAC3	2415.27	0.741504	0.0224984
GPR161	1176	0.741589	0.00208409
FZD1	1196.95	0.744644	0.0227967
NBEAL2	1020.15	0.744842	0.0427517
PLCG1	8335.93	0.745684	0.001832
NELFCD	3426.99	0.746594	0.00128176
GPR153	451.87	0.749139	0.0138085
BRD8	3932.4	0.749854	8.95288e-05
ENDOV	650.934	0.749999	0.0175044
HIC2	382.548	0.750738	0.00735688
TMCO6	591.712	0.751465	0.00478297
OSBPL3	994.777	0.752242	0.0156064
COLGALT1	9019.8	0.754477	0.0130577
L2HGDH	510.976	0.757475	0.0461213
POLD3	697.4	0.757856	0.0189947
ACVR2B	445.093	0.759922	0.043295
WDR6	8652.03	0.760832	0.00011022
SLC2A12	380.89	0.761617	0.0427356
EYA2	481.413	0.761985	0.0382843
SKA1	407.301	0.762388	0.0247905
TIMP2	18728.4	0.763698	0.00362652
POMT2	1034.4	0.76378	0.00487701
ATAD3B	442.483	0.76415	0.0410419
ROGDI	523.496	0.764611	0.0427517
EMC6	415.455	0.765498	0.0390646
SDHA	7742.1	0.767029	0.00736598
CASP2	2022.19	0.768332	0.00824648
BRAT1	2193.85	0.768341	0.0431808
TMTC4	934.638	0.769749	0.00403925
EED	939.192	0.770364	0.0200726
BTBD3	2225.71	0.770497	0.00468254
ZMIZ2	1881.68	0.770567	0.000448952
HAUS7	1296.53	0.770946	0.00610255
KCTD14	797.894	0.771573	0.0185933
HMGB3	1836.22	0.773382	0.00281592
SLBP	1171.72	0.775132	0.000250851
GSTT2B	936.055	0.776557	0.014471
TUBB2B	2543.39	0.776573	0.0100806
PIK3R2	3323.05	0.776716	0.01988
UNG	2399.17	0.777558	0.0209597
FRMD4A	1511.47	0.779018	1.61251e-06
EZH2	987.891	0.780275	0.0166187
DPF3	371.919	0.781136	0.00859725
DBNL	7026.65	0.781225	0.0470463
LIMD2	2463.97	0.782538	0.0319978
DNMT1	5801.26	0.783019	0.00853503
CABIN1	4385.55	0.783882	0.00885145
PRKX	705.775	0.78389	0.0132039
PNP	781.759	0.784006	0.00907547
SLC2A6	1014.95	0.78402	0.0306661
ZNF431	329.783	0.784995	0.0373519
P3H2	1478.96	0.785242	0.0380063
NA	885.841	0.785587	0.0240099
PAK1	2615	0.786494	0.000882805
MAP4K2	1663.1	0.786981	0.00466624
LSM11	983.938	0.786989	0.000679855
RPL23A	17751.4	0.788232	0.0206591
TBCB	1684.71	0.78989	0.0410589
FAM86C2P	248.814	0.790792	0.0431861
TMPO	2956.32	0.79095	0.0333222
MCRS1	2442.14	0.793269	0.0445026
LTA4H	2628.83	0.793544	0.000109972
EPB41L2	1777.2	0.793928	0.00436352
DIP2A	1528.55	0.795461	0.0187968
NAV1	3074.19	0.796748	0.00198082
RFC2	1804.41	0.798286	0.0361424
ACLY	12898.2	0.798518	0.00316134
PCOLCE2	408.073	0.799655	0.0127371
TBCD	2254.37	0.80046	0.0232421
AAAS	1878.51	0.800824	0.0246019
MOV10	4225.2	0.801232	0.00301694
GAL3ST4	1007.33	0.802063	0.00447331
MCM5	3108.61	0.802777	0.0393465
TMEM97	1425.55	0.80284	0.00843045
PTPN18	899.37	0.80423	0.00443894
XRCC1	1139.62	0.804857	0.00333059
KIAA0895L	709.185	0.805741	0.0403256
TRIM62	653.594	0.80613	0.0355844
TCTN3	1863.08	0.806555	0.0447836
ZRANB3	217.127	0.806567	0.0116837
MASTL	310.578	0.806751	0.0417381
MAD2L1	852.889	0.807667	0.0424285
MTMR4	2542.37	0.808687	1.55454e-06
DCAF11	2222.12	0.809613	0.0238907
SMARCA4	5840.83	0.809941	0.000770242
CENPN	984.594	0.80999	0.00797842
KCTD7	1302.55	0.810651	5.57837e-05
NCAPH2	1193.62	0.812347	0.0421793
MED31	354.384	0.812464	0.022221
PARP2	882.574	0.81613	0.00035207
SPIN4	472.825	0.816241	0.0341787
LASP1	14844.9	0.816559	0.0106392
CALR	44493.1	0.818197	0.00384065
HERC5	446.888	0.818294	0.00223068
OLMALINC	714.182	0.818954	0.0116597
ALDH7A1	5826.58	0.820199	1.7371e-05
UBR7	2057.71	0.821257	0.000175931
GLA	1085.41	0.821583	0.00298173
PRKD1	790.183	0.822578	0.0385629
MCRIP1	1819.71	0.822769	0.0436433
ERG28	1524.28	0.823183	0.00290077
CCDC85C	1347.58	0.82419	0.0172004
TCTEX1D2	154.295	0.824253	0.0271058
HAUS4	1393.86	0.824834	0.0116923
CNIH3	603.441	0.825864	0.0065303
CEP131	606.134	0.827064	0.00587537
UBB	31297.6	0.828294	0.036889
MAFB	1897.94	0.828637	0.0199968
PLEKHO1	577.33	0.828846	0.0478572
RFX1	522.415	0.829288	0.0265388
PAFAH1B3	1752.1	0.830263	0.0402774
TNFRSF19	538.077	0.83119	0.000781503
CCN4	217.811	0.833668	0.0197004
MYD88	1967.54	0.833913	0.00359237
OSGEP	550.764	0.835292	0.00102525
RANBP1	2618.55	0.839866	0.00314903
COTL1	8973.76	0.840646	0.0277409
RPL23AP42	6851.62	0.842281	0.0257531
P3H3	919.545	0.843632	0.0110516
STBD1	190.693	0.845102	0.0232413
DCAF15	904.466	0.845639	0.0200726
ATRIP	564.073	0.847108	0.00359237
ADCY1	279.139	0.847307	0.0176026
IL7R	359.656	0.847695	0.0104068
DROSHA	3272.09	0.848628	0.000974783
HSD17B7	258.18	0.850497	0.0282532
TBC1D1	1574.37	0.850989	3.53412e-06
NAGK	1419.11	0.85247	0.0223121
ZNF560	193.709	0.852566	0.0152293
NUDT1	631.716	0.854044	0.0322381
MAF	448.523	0.854321	0.026487
HMGN2	18845.1	0.854824	0.00313298
MYO18A	6268.65	0.855536	0.00313828
EML1	484.474	0.855968	0.00225072
CNP	8135.36	0.857064	0.0170391
MED24	2696.82	0.85909	4.0033e-05
PDGFRL	702.516	0.860857	0.0248653
PARP1	8598.13	0.860964	0.000591613
DHFR	3412.68	0.862828	5.15102e-06
PDCD4-AS1	261.361	0.8638	0.021888
TMEM256	1276.11	0.864915	0.0389975
APOBEC3C	3195.83	0.86512	0.0132688
SPICE1	415.89	0.86594	0.00742034
FTSJ3	4301.92	0.869586	0.000467678
CCDC34	784.063	0.869707	0.000941618
KLF6	2174.16	0.871437	0.000275477
ARHGAP5-AS1	247.455	0.871793	0.0230069
SMS	2868.88	0.871993	5.09313e-07
ADD1	6801.66	0.872815	0.00262563
MOSPD3	862.106	0.874184	0.0339036
C1orf35	351.249	0.875147	0.0106687
CPM	241.323	0.875541	0.0152041
IP6K2	2760.5	0.875608	1.33323e-07
LMNB2	6309.86	0.876024	0.006019
TCIRG1	1594.02	0.876502	0.00485141
TFAP2A	1884.85	0.877304	4.68485e-06
WDR54	1114.39	0.877525	0.0224539
RECQL4	1835.7	0.879717	0.00399227
SRD5A3	410.475	0.879901	0.0123546
CKS2	1411.15	0.879939	0.00049525
FADS2	13522.8	0.880859	0.00760203
CALHM5	197.483	0.88126	0.00843045
RAB40B	460.996	0.881597	0.0247091
STARD13	571.028	0.88168	0.00171915
TSPAN13	293.13	0.882548	0.00625338
STARD8	1135.32	0.883343	0.00569025
S1PR1	388.113	0.883786	0.0210067
FRMD6	9026.55	0.886016	0.00116597
STIM2	1059.5	0.887977	0.00264236
KHDC1	169.686	0.887988	0.0157692
RCAN2	3189.28	0.888715	0.000143368
CDKN2D	185.111	0.889169	0.0250832
RACGAP1	2333.67	0.88973	0.00151233
EHMT2	4877.55	0.891131	0.00244021
RABGGTA	600.086	0.891333	0.00225207
DTYMK	1174.15	0.891794	0.0258276
FN3KRP	1364.31	0.892375	0.0056973
MET	1042.32	0.892692	0.0354047
PXMP4	1118.7	0.893259	0.0378208
SPIRE2	742.726	0.894327	3.27152e-05
CENPA	337.535	0.895565	0.000959969
TLR2	169.248	0.895715	0.0189797
AKAP12	1874.78	0.895978	0.0096433
FSD1	978.367	0.896081	0.00902331
HMGN3	746.821	0.896527	0.00130306
JPH1	119.501	0.897365	0.0273491
AMOTL1	4836.09	0.897952	1.79814e-06
DIAPH3	1247.13	0.898537	0.0121611
AC011450.1	103.78	0.900268	0.0487012
ANAPC15	614.308	0.900307	0.0103663
GMNN	663.712	0.900782	0.0233159
SRR	604.289	0.900976	0.0322944
RNASE1	365.096	0.901505	0.0148994
TSPAN11	2707.43	0.901801	0.0396723
RNF144B	93.9646	0.903801	0.0318926
PAK4	1554.55	0.904406	0.0395156
AUNIP	195.044	0.905294	0.00714108
USP21	1168.32	0.906221	0.00107104
RNPEP	2565.1	0.906747	0.0230633
WDR62	595.216	0.907314	0.0253595
TRABD2A	373.771	0.909491	0.0066992
SFMBT2	422.257	0.909637	0.0103183
CTXN1	349.584	0.910242	0.0173968
SLC29A1	2459.56	0.912428	0.00117068
CYTH2	2850.92	0.912678	1.4697e-05
RGCC	120.955	0.914739	0.048285
EMC9	475.647	0.915161	0.0324189
ANKRD13B	539.082	0.915855	0.00107448
SMTN	1425.06	0.91617	0.00425132
SIX1	362.769	0.916235	0.00533226
DDAH2	2295.34	0.916289	0.0067147
MAST4	464.913	0.916322	0.0176026
SOBP	581.891	0.916445	0.000107733
NUTF2	3833.01	0.916767	0.00532719
THSD4	2083.36	0.919042	0.000429176
SPA17	258.095	0.919265	0.0132031
SETD9	226.588	0.919942	0.0100132
PREP	2100.19	0.920556	0.0016994
FASN	11992.7	0.920669	0.0164466
NDUFA2	1341.23	0.920702	0.0117013
RGS14	450.159	0.921399	0.0448434
ARRB2	955.989	0.921924	0.00189772
NA	207.255	0.92329	0.0110722
F2R	9109.42	0.923903	0.000486736
AC104051.2	171.205	0.924003	0.00754713
SETBP1	575.972	0.924216	0.034636
TUBB	58032.5	0.926006	0.0137312
ALYREF	1781.47	0.927216	0.00431476
TMEM44	673.334	0.928003	0.000133339
KDM1A	5039.25	0.928306	4.00868e-06
ARL6IP6	538.574	0.92858	0.00623156
PCYT1B	256.206	0.930237	0.00879934
COL3A1	827.862	0.931736	0.0291509
NRM	1022.09	0.934422	0.031103
SGSM2	4367.8	0.935093	6.27696e-07
RUSC1	877.296	0.935213	0.00253646
SPSB4	164.375	0.935293	0.0194863
GALNT14	670.786	0.937166	0.000741319
MAOA	650.08	0.938115	0.0114733
TGFB1I1	1962.07	0.940029	0.0256123
AC109439.2	151.532	0.940175	0.0103201
ITGA10	144.295	0.94072	0.0497309
NTHL1	556.564	0.940945	0.0335121
MGAT5	4676.68	0.94096	2.42372e-08
DPYD	324.993	0.941953	0.021977
CDH24	1171.62	0.942055	3.78067e-05
DAAM2	2772.7	0.943407	0.000141767
CSGALNACT1	345.022	0.944401	0.0357288
CENPH	1138.01	0.94746	6.05197e-06
NASP	3240.62	0.947492	0.000297849
SUFU	1071.44	0.950426	0.0012001
FANCL	477.24	0.950866	0.000339574
PPP2R5D	3606.26	0.95099	0.0041226
METTL7A	716.155	0.951173	0.000388684
LRIG1	1075.3	0.951713	1.02613e-06
SLC25A5	9289.76	0.952354	0.0063466
VRK1	388.7	0.953532	0.00159924
CENPX	1049.09	0.957628	0.0224984
ACTG1	80077.2	0.961165	0.021772
PCDHB13	97.5921	0.961684	0.0207243
UBE2S	2573.1	0.962666	0.0380591
CRIP2	2927.61	0.962904	0.0200726
MAGED4	697.458	0.964933	0.0185726
FEN1	2549.36	0.965946	0.00251811
TEDC2	503.238	0.965966	0.0121808
KIF3C	1187.46	0.968885	0.000467678
LRWD1	1372.9	0.970467	0.0243967
NA	137.972	0.97048	0.0349963
CNTROB	1409.55	0.971091	3.1564e-05
TRAF3IP2	603.524	0.973136	0.00397074
ECM1	232.578	0.973526	0.0201283
SPATA6	366.977	0.974867	0.00817838
H1FX-AS1	76.3736	0.976411	0.0479439
POLA2	1025.83	0.976759	0.036889
SEMA6C	426.709	0.976794	0.00113732
PRPS2	1654.25	0.977404	0.00022596
HECTD3	2111.29	0.977949	0.00362715
ZNF653	205.008	0.978211	0.0357646
CTC1	761.649	0.979828	8.50921e-06
BEAN1	210.266	0.980434	0.0326556
FERMT1	442.75	0.982381	0.000298157
NADK2	2351.24	0.98317	0.0189955
SF3A3	3637.54	0.984119	0.000462279
CEP72	430.658	0.984213	0.00307905
MARCKS	3001.38	0.984903	0.00236752
GRAMD2B	515.693	0.986572	0.00301694
THEMIS2	230.054	0.986632	0.00556513
MYO1D	1375.09	0.986956	6.66624e-06
NLE1	1396.1	0.989973	0.00778846
GPR39	105.132	0.991449	0.0273862
ZNF774	154.127	0.991864	0.0418627
EIF4E2	2167.63	0.995122	0.00120711
HNRNPA1	26744.3	0.995744	2.44382e-12
P4HA3	217.578	0.996154	0.0107137
CHEK2	529.807	0.996192	0.000215842
TRPV2	1121.31	0.999717	0.00436461
FANCD2	1084.28	0.999942	0.00189772
TBX3	4179.98	1.0033	7.84211e-06
DDX12P	101.083	1.0059	0.0298162
SUSD2	624.259	1.00735	0.0203916
PMEPA1	469.797	1.00958	0.00191563
SCARA3	1887.42	1.01092	0.00773993
FDXACB1	143.637	1.01216	0.00484163
RNF144A	455.703	1.01466	0.000122151
PODXL2	4347.55	1.01515	0.00195811
TCTN2	544.578	1.01563	0.000230539
C3orf70	260.109	1.01567	0.0328742
TMSB15B	201.2	1.01706	0.00051348
CALM3	11454.5	1.01791	0.00104232
ENDOD1	3093.11	1.01901	6.8655e-07
AGAP2-AS1	437.118	1.0196	0.00915774
CENPF	1517.86	1.0202	0.02999
FZD2	1117.38	1.02107	0.00249099
NA	531.283	1.02205	0.0275018
CDK5R1	240.529	1.02393	0.00844875
NA	300.087	1.02493	0.00349832
BICC1	583.162	1.02605	0.00313828
FCHSD1	892.199	1.02889	1.05236e-05
AC007996.1	102.581	1.02939	0.0146485
CDKN2C	1100.12	1.03088	4.28419e-05
AC009779.4	139.023	1.03246	0.0187968
DCBLD2	4022.26	1.03261	0.00549702
MYH10	7985.62	1.0329	0.000233976
GLB1L2	142.183	1.03296	0.0146018
SOCS2-AS1	154.183	1.03397	0.00874322
DBF4B	584.605	1.03463	0.000141451
GDPD5	894.095	1.03476	1.17659e-05
ANPEP	781.823	1.03488	0.000414538
APAF1	704.755	1.03541	0.00393699
MED16	2203.77	1.03623	0.00735688
SLCO2A1	631.751	1.03674	0.00674537
FAM81A	89.3815	1.03789	0.0357663
MCM4	3992.14	1.04037	0.0123033
CKAP2	1319.74	1.0406	0.00537891
SUV39H1	644.996	1.04118	0.0136736
ITPKB	1232.58	1.04141	6.56682e-05
MAEA	1910.63	1.04151	0.0013075
ADAMTSL1	94.6441	1.04154	0.013484
DDX39A	1364.96	1.04288	0.00190281
TAGLN2	11071.4	1.04527	0.0195091
KIAA1841	215.372	1.04567	0.0403785
PIK3R3	2528.61	1.04723	8.78284e-09
TDP1	543.314	1.04729	0.000127905
FDPS	3083.25	1.04773	0.0014516
GGT5	486.801	1.04816	0.00585468
FAM131B	279.833	1.052	0.0317588
NCAPD2	6479.4	1.05209	0.00022841
TULP3	1195.35	1.05571	9.33242e-08
LTBP2	2347.6	1.05629	8.72794e-05
MPP2	1185.9	1.05641	0.00178391
CIT	1189.14	1.05862	2.12476e-06
BGN	45707.8	1.05945	0.00148775
CNIH2	393.77	1.06326	0.005521
CDCA4	838.349	1.06443	0.00155438
PLSCR3	1986.25	1.06608	0.00481229
FBXO5	368.28	1.06672	0.00128254
TUBB3	1915.9	1.06755	0.0104182
CHTF18	877.373	1.0678	7.30173e-06
E2F1	1006.92	1.06815	0.00954393
RAD51	190.311	1.07022	0.0297074
TUBB4B	10500.2	1.07037	0.0277988
GINS3	505.396	1.07056	1.81644e-05
FAM110A	226.832	1.07084	0.0093093
PTPRN2	583.896	1.07086	5.88961e-07
DPF1	120.467	1.07137	0.0149341
WNK4	898.517	1.07207	0.000376959
WEE1	1135.01	1.07337	1.65608e-05
CBX1	3254.81	1.07498	3.30431e-07
CORO1A	192.109	1.07536	0.0379564
HSPA2	1301.1	1.0767	0.000685384
SLC6A16	197.188	1.07743	0.0166671
NCAPG2	1703.62	1.07824	1.37022e-05
MVK	825.892	1.07897	0.0209482
KIF22	2239.76	1.07921	0.000196844
ARAP3	2856.29	1.08179	0.000144857
SMC4	1863.8	1.08204	0.0259024
TENT5A	340.49	1.08486	0.000726539
MAP3K1	4054.52	1.08496	0.000428303
BUB1B	767.95	1.08517	0.00190531
FBLN1	4964.53	1.08621	0.000463976
RGS12	728.966	1.08735	1.82697e-05
PCNA	3762.23	1.08929	0.00184195
ARHGEF39	442.409	1.09097	0.00039546
STARD5	285.344	1.09113	0.0184978
TMSB10	20823.4	1.09129	0.00367238
DUBR	168.29	1.09175	0.0178414
ARFGEF3	111.386	1.09186	0.0300381
NACAD	1010.23	1.09356	0.00495159
HHAT	233.286	1.09674	2.91812e-05
HIC1	1211.81	1.09757	0.00832289
PTGER2	400.048	1.09809	0.000268203
CENPW	182.579	1.09837	0.000924219
DDX46	1384.07	1.09845	0.0102575
SCN8A	324.914	1.09851	0.0104277
RHOBTB1	751.83	1.09984	0.0189955
GALNT5	259.714	1.10248	0.0032216
CCDC3	443.393	1.10359	0.00661595
SVIL	3640.02	1.10371	0.000641608
HNRNPA1P48	128.98	1.10675	0.0160703
INKA2	468.979	1.10746	0.000201204
PALLD	3546.16	1.1076	9.03288e-06
IGSF9	89.1291	1.10802	0.0248233
TRNAU1AP	720.681	1.10828	0.000359583
ILK	8696.28	1.10849	0.00225072
ITGA8	287.82	1.10913	0.0173037
CASP6	510.216	1.11251	0.000253073
CCNG2	1329.66	1.11577	9.44563e-05
PIF1	334.801	1.11651	0.0113155
SYT13	480.949	1.1167	5.73954e-06
MYO19	1932.14	1.11697	9.55603e-08
SLFN12	669.039	1.11778	0.00201579
BCL2L11	697.656	1.11988	0.000163454
CDH2	503.186	1.12596	1.37582e-06
TSPAN15	515.185	1.12864	6.0624e-05
SHROOM4	568.21	1.12875	5.31251e-05
RBMS2	2488.78	1.12907	0.0148907
PLD2	1278.03	1.12935	2.0158e-07
TMOD1	724.955	1.13307	0.00179869
PSRC1	1148.88	1.13308	0.00050821
WDR76	304.603	1.13319	0.0207397
HAVCR2	111.046	1.13556	0.0244074
TREX1	491.006	1.13678	0.00107505
HMGCS1	2968.52	1.13703	0.00304447
HAUS5	973.245	1.13718	1.19043e-07
IER5	1178.83	1.13833	0.000511421
CCDC15	168.057	1.13935	0.00484219
SGO1	159.124	1.14164	0.00128254
CD200	85.338	1.14616	0.0253802
ANG	113.136	1.14703	0.00996374
EGFLAM	171.031	1.14716	0.040449
ARHGDIA	8796.59	1.14896	0.00313096
HROB	297.999	1.15099	0.000359584
POLE	2220.24	1.15292	4.27583e-07
DDAH1	1498.27	1.15358	7.94737e-05
KPNA2	5520.02	1.15362	0.00036181
NUSAP1	885.757	1.15429	0.0133145
ACBD7	83.54	1.15491	0.0149135
BMP4	625.951	1.15771	1.014e-07
PKMYT1	579.705	1.15831	0.0114266
MYO5B	188.339	1.15999	0.00804592
CAMK1G	781.788	1.16343	0.00156112
TIMELESS	2962.67	1.16344	1.38342e-07
DYRK1B	641.237	1.16688	0.00156112
BAALC	223.225	1.16883	0.00199035
ANXA1	1054.68	1.17195	0.036284
PGM2L1	326.129	1.17226	0.00240143
NT5DC2	2536.01	1.17271	0.000797177
PPL	111.605	1.17397	0.030206
GALNT6	1275.47	1.17551	1.56851e-05
CYSLTR2	120.385	1.17636	0.0115035
CCDC32	559.416	1.17756	2.61998e-05
DRD2	124.164	1.18231	0.00175827
PLCD4	939.783	1.1828	0.000511421
CHN1	422.358	1.18454	9.67826e-05
MND1	95.0607	1.1866	0.0192743
CCNB2	1752.86	1.19185	4.6276e-07
STMN3	4989.25	1.19289	0.000183614
FXYD6	1415.19	1.19303	4.33995e-05
FANCE	331.965	1.19519	0.00203206
SLFN13	1324.3	1.19575	2.77369e-05
BUB1	1095.49	1.19704	0.000223115
ITGA9	1174.17	1.19751	0.0111697
CDKN3	336.604	1.1976	0.00519009
FANCG	1365.96	1.19783	0.000440523
MCM2	4160.44	1.20105	0.000220266
LAMA4	5355.22	1.20169	0.000159718
MCUB	227.489	1.20364	5.47159e-06
ADAM19	1559.84	1.20469	2.19654e-08
PLIN3	3397.97	1.20539	0.00413374
DDX11	1031.36	1.20619	0.00020508
CMBL	3254.25	1.20823	2.47114e-06
NA	573.071	1.20892	0.0102286
PLCL2	63.4555	1.20911	0.0160657
ENOX1	108.903	1.21233	0.0357951
HMMR	786.959	1.21377	0.0224838
RAB3B	996.877	1.21444	4.38126e-05
CHAF1B	805.582	1.21457	0.00184195
NRP1	5491.33	1.21611	0.000332097
CDC7	565.872	1.2163	0.0305425
H2AX	3013.33	1.22017	0.00277709
LINC01224	212.708	1.22229	0.00285348
PRC1	2555.66	1.22277	0.00027663
CHST2	414.736	1.22291	0.00112142
MYL6	19756.4	1.22415	0.00180632
SOX4	2498.69	1.22447	3.39843e-05
BMF	1327.24	1.22571	2.63844e-05
SLC25A48	99.8352	1.22834	0.0482328
[truncated: 502 more rows]
