# Supplementary material for: TAZ-CAMTA1 and YAP-TFE3 alter the TAZ/YAP transcriptome by recruiting the ATAC histone acetyltransferase complex
Source: eLife journal article supplement (doi:10.7554/elife.62857), 2021-04-29
Supplement: supp [file elife_poa_e62857_Figure_3_source_data_1.xlsx]

## Sheet: DEgenes_NIH3T3_YAP5SA_vs_EV
Gene	baseMean	log2 Fold Change	padj
Upk1b	1749.01	14.3011	1.38556e-25
Slc6a12	232.627	12.3364	6.78178e-23
Wnt7a	83.295	11.5844	7.61315e-20
Wnt7b	75.6654	11.5093	1.15623e-18
Anxa8	232.838	11.3274	3.77217e-19
Cdh15	124.665	11.2631	1.0579e-18
Vip	761.406	11.1669	5.91316e-17
Serpinb9g	65.5698	11.1537	4.43149e-19
Il31ra	119.783	10.4167	1.72315e-16
Robo3	32.484	9.8912	3.56212e-12
4933402E13Rik	48.2596	9.67657	3.14367e-14
Lamb3	47.9384	9.67567	1.13737e-13
Crct1	218.199	9.63951	3.67962e-14
Tmem150b	157.485	9.61141	2.91117e-07
Birc7	495.598	9.46955	2.53426e-75
Jph2	553.318	9.0264	1.73136e-88
Serpinb1c	17.2023	9.00703	1.38697e-10
Dnah11	127.606	8.93768	2.64552e-07
Serpinb9e	15.7512	8.91519	2.899e-11
Psca	64.9212	8.87952	1.52558e-11
Gm15056	33.5746	8.79269	0.00852119
Ankk1	13.3364	8.69128	1.12536e-10
Cnfn	24.0948	8.56601	2.76127e-10
Gm1110	11.9262	8.56001	7.90303e-09
Doc2a	128.94	8.53954	0.00110897
Adamts13	189.315	8.5217	0.00267047
Ikzf4	76.1794	8.36125	1.37697e-21
Sult4a1	8.2985	8.3019	1.77011e-08
Dppa4	15.3659	8.29964	4.14757e-09
Sh3tc1	213.073	8.26823	4.67289e-29
Got1l1	8.44042	8.23198	1.60526e-08
Gm9428	14.619	8.20204	1.087e-09
Vmn1r44	18.9788	8.19314	3.43855e-10
1700012B07Rik	12.4703	8.19105	1.48317e-09
NA	188.127	8.14379	1.80725e-40
Pkhd1	14.1614	8.12416	6.89623e-06
Gm13415	175.334	8.11422	5.17609e-40
Tmem171	242.282	8.1107	1.98185e-20
Ccl20	50.886	8.10956	2.37895e-09
Atg9b	216.608	8.10373	4.88723e-54
Adam22	234.575	8.07445	5.49911e-27
Serpinb1a	435.17	8.04609	3.14611e-76
Serpinb9f	8.68143	8.01638	4.00216e-07
Gm13418	7.05192	7.99999	9.49831e-08
Limch1	706.477	7.91837	4.75796e-72
Hist1h4n	13.899	7.71133	3.79004e-08
Gdf15	40.7717	7.69073	1.75148e-11
Gm27286	31.9452	7.68379	1.2344e-07
Pax8	75.1137	7.66488	1.49753e-22
Serpina5	6.80192	7.65808	3.20155e-07
Arhgap9	58.2115	7.60288	2.88863e-19
Prg2	8.09846	7.56716	5.17848e-07
Ces2e	38.3663	7.56165	2.25235e-11
Ces2f	8.0356	7.55293	2.11817e-07
Gm25043	5.79462	7.50332	1.13647e-06
Rapgef5	8.0565	7.48207	5.84215e-07
Ccdc113	31.5383	7.47354	8.60125e-19
Ctnnd2	13.329	7.4689	3.37197e-08
1520401A03Rik	8.11418	7.44944	2.0381e-06
Parm1	50.6274	7.41426	1.27034e-08
Krt14	42.8436	7.39115	7.95272e-19
Serpinb9b	3482.51	7.32778	1.27156e-86
Epn3	33.3138	7.32683	3.7581e-14
Snca	7.3962	7.32219	2.09823e-05
Gm13284	12.9921	7.30839	1.84242e-07
Sntg1	26.6545	7.27436	3.58289e-08
Cyp3a13	57.5751	7.26898	3.77761e-21
Gm12153	16.7324	7.18473	5.36639e-08
1700009N14Rik	112.449	7.18176	9.57587e-28
Gm43154	35.3263	7.16794	1.18747e-07
Nkain4	34.4227	7.16062	1.39833e-12
Snx20	7.50168	7.15875	1.2579e-05
Upk3bl	49.5526	7.11848	1.8431e-19
Vnn1	94.9677	7.10906	8.32663e-17
Msln	8968.24	7.05865	3.70216e-34
B230206L02Rik	12.4341	7.012	9.4424e-07
Cyp24a1	5.8173	6.9939	8.44757e-06
Cblc	13.395	6.98478	1.20277e-06
Trav13-2	8.53747	6.96673	1.28867e-06
Gm21293	16.493	6.94899	3.10361e-06
Btn2a2	21.6726	6.91192	1.87522e-09
NA	26.0631	6.90028	6.3349e-07
Tmem246	6.73677	6.89985	1.72769e-05
Gm5286	7.53189	6.89576	7.57452e-07
Gm15389	6.56767	6.88097	7.14077e-06
Psd4	5.21905	6.86138	5.47849e-05
Serping1	32.7794	6.84565	1.20578e-07
Gm12295	5.96544	6.84482	2.29845e-05
Hbb-bh1	14.9421	6.82004	3.82279e-08
Tnnt3	106.612	6.80957	1.14695e-20
NA	240.539	6.7837	0.000711276
Spo11	29.7567	6.76635	7.39566e-07
Krt7	1408.92	6.74254	1.43894e-124
Slc47a1	16.3281	6.7414	2.27213e-06
Slc2a12	153.088	6.73372	0.0113902
Ptprt	174.328	6.71787	1.18908e-09
Fras1	50.5421	6.70647	1.96856e-06
Myom2	1179.53	6.66895	6.94407e-72
Dsp	6.3802	6.65117	0.000396677
Gm5812	53.478	6.62794	0.00623354
B3gnt3	5.75918	6.61221	1.50174e-05
Plekhs1	102.302	6.59776	1.32856e-36
Dnaic1	8.46166	6.56152	6.37648e-05
Hepacam	5.66674	6.45635	0.000108421
Arg1	5.52335	6.43466	1.86866e-05
Foxa3	6.49281	6.4309	6.56182e-06
Vill	20.0197	6.40689	4.41902e-06
Kdr	75.9215	6.39678	5.52899e-22
Far2os1	51.8405	6.37525	1.54656e-25
Ninj2	25.8424	6.33897	2.76918e-15
Gm13710	14.9198	6.32401	1.7579e-10
Ptprq	158.596	6.28864	1.57353e-25
Hist1h2br	20.3653	6.27246	8.55945e-07
Sgce	5.71942	6.26431	1.32964e-05
4933427D06Rik	13.6444	6.25437	4.64245e-07
Gm53	5.85482	6.24515	3.9176e-05
Serpinb6b	303.433	6.21975	3.11667e-85
Gm10505	10.248	6.21042	7.3364e-07
Ttn	108.536	6.08378	2.69173e-07
Zfp750	9.30652	6.07599	5.5603e-07
Inpp5d	43.7488	6.04812	1.60179e-10
Slamf9	31.6721	6.04319	1.58741e-13
Sh3rf2	283.663	6.02522	3.56195e-39
Fgfbp1	21.3966	6.02487	7.22749e-09
Mogat2	37.4973	6.02334	1.79254e-16
Siglecg	4363.02	5.9092	3.82335e-132
Gpr174	13.3352	5.9016	1.76083e-06
Csf1r	229.307	5.88239	1.02779e-51
BC051019	6.8173	5.83613	6.33307e-05
Fyb2	205.462	5.83232	2.4281e-29
Prl3d2	7.10839	5.81061	2.83583e-05
Lama5	488.289	5.80083	6.75398e-26
Klra4	79.2878	5.79942	1.27418e-19
Fgf21	49.4827	5.76597	1.62195e-11
Synpr	13.6668	5.74175	5.00923e-05
Ifitm10	12.423	5.72561	1.02343e-08
Psme2b	18.2671	5.72003	1.07523e-05
Syk	89.2727	5.69854	6.77611e-18
Tnfsf18	94.0493	5.69757	4.59705e-21
Upk3b	18.3839	5.68024	1.04049e-06
Scel	35.5646	5.6497	0.000200101
Card10	5.87499	5.64968	0.000292852
Fcgbp	17.6499	5.62835	3.79199e-12
Wdfy4	18.0942	5.62638	2.22548e-05
9530053A07Rik	64.3729	5.61136	4.50046e-21
Btn1a1	43.1525	5.59059	1.07298e-16
Hephl1	25.6022	5.56218	0.000103598
Smarca5-ps	60.0376	5.56089	0.0110861
Klk8	65.8813	5.5538	3.72579e-23
Lamc3	81.7366	5.52982	4.07334e-25
Ptgs2	3952.83	5.52219	6.24654e-35
Hspb7	111.585	5.52017	2.0059e-33
Slc15a3	5.50767	5.49545	4.26934e-05
2610028E06Rik	10.9757	5.4521	4.98943e-05
Myoz2	26.2064	5.44479	1.06462e-17
AU021092	16.8814	5.44477	0.000129574
Slc30a2	5.64036	5.44253	0.000132401
NA	43.8698	5.43971	1.24561e-07
Emcn	5.59271	5.42407	6.48131e-05
Ttll9	5.37735	5.41111	0.000605084
Gm14341	16.9376	5.4036	4.84939e-10
Nppb	446.926	5.36504	1.97182e-44
Tgtp1	20.6147	5.3414	1.98633e-11
Fst	208.705	5.32317	6.84705e-37
Fcna	17.1669	5.31944	2.3684e-05
Dpp4	5.2659	5.31774	0.000572953
Cobl	32.6394	5.26482	2.24812e-10
Gm10696	6.66762	5.25515	0.000973294
Lims2	179.016	5.2548	1.39425e-40
Sbk3	20.1066	5.23994	2.02486e-08
Ccdc81	6.3181	5.23798	0.000159029
S100a7a	436.701	5.2243	2.35799e-81
Ablim3	364.565	5.21178	2.97386e-49
Des	60.7591	5.20267	1.39538e-16
Gm26635	8.22307	5.1806	0.0311635
Gadd45g	1363.86	5.17733	1.44417e-90
Ccn1	16942.6	5.16433	1.41278e-33
Tmeff2	105.296	5.16156	1.63452e-27
Als2cl	101.828	5.15861	9.31033e-10
Cyp2ab1	5.55444	5.14719	0.000755515
Mat1a	7.83477	5.1418	2.03192e-06
Vmn1r-ps128	315.81	5.1375	3.30963e-44
Serpine1	8069.15	5.09786	1.40158e-53
Adgrl4	5.88532	5.09478	0.000387156
Tmem182	44.6317	5.08462	8.44675e-16
Folr1	25.65	5.07569	1.37414e-14
Dppa2	32.6822	5.07272	3.51266e-16
Suox	3135.58	5.04747	8.77757e-164
Rnd1	586.338	5.02821	7.60599e-58
Gm27224	10.4132	5.02103	8.43734e-08
Vtn	30.2387	4.99739	3.0026e-08
Csrnp1	607.384	4.98804	3.69395e-55
Lman1l	19.177	4.98614	3.63105e-12
Tcp11x2	18.4497	4.96239	4.2697e-09
Gprc5a	2003.57	4.95709	1.7594e-70
Slc2a3	86.4905	4.95143	6.31986e-14
NA	87.8527	4.93449	1.01982e-29
Misp	6.78213	4.91676	0.000484245
Pim1	2348.87	4.91247	9.85701e-51
Tnni2	25.5221	4.89445	1.6777e-14
Klhl30	170.201	4.89378	1.63147e-28
Pmaip1	85.1552	4.87351	2.11664e-33
Cdc42bpg	72.4716	4.86989	1.97144e-14
Pkp2	365.327	4.85562	1.1e-76
Eps8l2	14.9763	4.84602	7.62978e-05
Hapln1	63.3439	4.8374	0.00520182
Foxn1	11.8092	4.82326	2.3197e-08
Syt8	16.5799	4.79698	5.95537e-07
Xlr3a	7.7169	4.75807	0.000253163
Gsta1	191.607	4.75634	9.41165e-33
3425401B19Rik	10.9322	4.75255	0.00242168
Sdcbp2	61.6266	4.75191	4.02043e-26
Gm15854	18.2366	4.75035	0.000108349
Rtn4r	11.4556	4.74613	1.84009e-08
Sorl1	6.29132	4.71192	0.00238966
Eml2	184.966	4.70641	2.30779e-51
Gm20521	108.193	4.6825	1.22443e-23
Gadd45b	5683.92	4.67525	6.4142e-65
Adrb3	11.4173	4.67484	1.60174e-08
Itih4	19.7059	4.65123	1.41158e-12
Sh3bgr	6.33077	4.64421	0.000559405
Prss27	17.7206	4.63928	1.1417e-09
Gm19345	11.4622	4.63273	5.79598e-08
Gm6088	11.0474	4.62501	0.00242263
Cdh5	11.0026	4.61167	0.00167843
Gm11351	79.4254	4.60464	3.35223e-29
Otoa	5.7293	4.60373	0.00360672
Klra5	12.8328	4.60094	4.97546e-07
Itga7	815.144	4.5913	4.77116e-56
Aldh1l1	17.66	4.58347	3.71777e-07
Oprk1	32.0318	4.58111	0.000429704
Tmem184a	18.1597	4.57451	8.12981e-08
Sbsn	1060.83	4.57205	2.85469e-200
Cdkn1a	10457.6	4.56884	1.75698e-73
Tuba8	7.27493	4.56484	9.41398e-06
Gm13988	25.6352	4.56039	2.83919e-10
Serpinb9c	5.60867	4.51936	0.00819581
Mamld1	9.31357	4.51119	1.49306e-05
Gata3	165.703	4.50476	2.84029e-36
Cdhr2	8.71526	4.49439	8.97051e-06
Gm6650	24.4531	4.48952	7.80202e-08
Tmem40	10.0962	4.47747	5.06036e-08
Panx3	37.5769	4.46369	0.00332101
Bach2os	7.93623	4.4627	0.000365216
Plcxd1	187.986	4.45151	3.91034e-69
Cfap70	23.3829	4.40052	1.10582e-07
Gli1	5.47793	4.36915	0.00456022
Cnksr1	26.3964	4.36586	5.15947e-09
Cd209c	391.252	4.35773	1.32808e-30
Clca3b	16.0026	4.3564	3.40632e-07
Gm10256	43.0094	4.35453	9.23566e-11
Cd68	539.089	4.34513	1.26871e-33
Mef2b	78.08	4.34051	0.015414
Slc17a7	5.76032	4.33126	0.00231296
Psg17	21.4702	4.32864	3.55924e-08
Gm15287	92.6024	4.32667	1.21386e-37
Ncf2	13.4177	4.31838	2.69049e-07
Gm10109	6.4094	4.29636	0.000171754
Klk1b27	12.0421	4.29578	0.00914322
Rpl29	569.759	4.29448	5.66514e-62
1110017D15Rik	13.7426	4.27704	3.34291e-07
Drc1	7.20544	4.27517	4.72599e-05
Wnt11	29.781	4.27132	8.87968e-10
2310002F09Rik	28.5421	4.26275	9.16208e-11
Cyp4f40	16.7882	4.26141	0.000475594
2900026A02Rik	18.9707	4.25829	1.12442e-08
Fgd5	6.72017	4.25814	0.00085392
Best3	5.26857	4.24455	0.00201567
Itga3	4169.26	4.23552	8.66376e-61
Perp	26.9901	4.22393	1.05565e-12
Trpm5	54.9835	4.21503	5.59442e-33
Lncenc1	53.164	4.19101	3.47348e-33
Gal3st2	33.3969	4.18631	0.00748399
Ccn2	7484.58	4.182	1.00869e-19
Chac1	2414.32	4.17861	8.86626e-71
Rassf7	636.397	4.17104	1.94673e-57
Cd80	43.1441	4.16588	2.34534e-16
Pkp1	13.7725	4.15096	2.74307e-09
C530050E15Rik	28.3054	4.14844	9.31198e-11
Zbtb8b	15.332	4.13588	8.60364e-09
Bcam	6.82103	4.13019	0.00294061
Ripor2	382.915	4.12868	1.12459e-31
Islr2	6.80116	4.12867	0.000199986
Casp14	18.0441	4.12661	1.12058e-07
Aif1l	2280.4	4.12368	8.31024e-90
Aldh1a1	6563.73	4.118	6.524e-30
U90926	10.0577	4.11765	0.0190203
Rtn4rl2	154.968	4.11462	9.82047e-25
Olfr456	23.6615	4.11141	1.09444e-07
Acvrl1	34.106	4.11011	2.07588e-14
Mypn	6.08665	4.09197	0.038064
Tnn	22.3836	4.08576	3.13667e-09
Prkag3	47.0875	4.07617	7.22817e-17
Mme	42.6056	4.07587	3.76848e-18
Hist1h4h	20.5801	4.0711	2.34828e-07
Pard6b	681.024	4.06033	1.46198e-43
NA	1301.96	4.04527	1.57115e-57
Llgl2	523.028	4.04484	1.21417e-64
Enkur	17.5217	4.03213	5.99533e-06
Speer3	6.08558	4.01841	0.0239814
Gm26640	7.68674	4.01789	1.97153e-06
Ddx4	6.74895	4.00599	0.036922
Muc15	5.02288	4.00505	0.0011263
NA	141.938	4.00487	1.04231e-33
Prrg3	9.64916	4.00082	0.000931104
Hist1h1e	12.4531	3.99138	1.23031e-08
Tjp2	3236.99	3.98693	2.76142e-83
Hist1h4i	68.6987	3.97094	2.83423e-14
Itgb7	197.254	3.97078	2.2558e-26
Dusp27	32.8036	3.96804	7.90303e-09
Tm4sf4	8.03116	3.96752	3.51539e-05
Gm20400	779.139	3.95922	4.72295e-26
Klk14	5.47072	3.93976	0.00371095
Dppa5a	5.54731	3.92654	0.00188017
Serpina1c	24.4037	3.92543	0.00155976
Exph5	13.8078	3.91347	0.00149188
Nr1d1	3745.69	3.91078	1.91835e-15
Gm26579	5.92831	3.90973	6.34505e-05
Adra1d	14.405	3.90755	1.50575e-05
Fbxw10	18.3928	3.89486	3.10397e-06
Slc2a5	32.5193	3.88982	2.64615e-05
BC051077	62.1749	3.88197	3.10917e-20
Krt80	423.338	3.87931	3.68446e-40
Tinagl1	7597.99	3.87603	1.09918e-61
Ces2g	117.943	3.87582	1.37809e-23
Dusp13	6.94157	3.86041	4.82772e-05
Gm12840	2928.57	3.85315	2.47061e-14
Tgm2	2829.88	3.85281	3.80952e-102
Serpinb1b	80.3828	3.84335	2.00752e-22
Rap1gap2	970.539	3.84271	2.78429e-51
Itgam	17.4115	3.82863	3.57589e-05
Pdlim1	2636.81	3.81145	8.1219e-37
Trim7	396.682	3.80017	1.7388e-105
Cpa4	91.4893	3.79376	6.95991e-12
Slc14a2	5.19824	3.79345	0.00184804
Hist1h1c	1898.76	3.79297	5.00114e-29
Inhba	546.698	3.78983	1.62834e-11
Sulf1	1797.81	3.78869	1.17641e-38
Crybg2	69.9443	3.78798	5.82632e-27
Prg4	107.048	3.77747	2.9909e-13
Snhg7os	10.4409	3.7754	4.48591e-05
Prelid3a	26.9271	3.7585	3.79e-11
Itgb4	228.691	3.7384	1.30299e-07
4930590J08Rik	8.3098	3.72751	0.000319293
Ripk3	33.3137	3.7252	3.56854e-12
Sorbs2	490.771	3.7236	4.1321e-24
Serpina1a	229.691	3.71848	1.29112e-23
Acer1	15.4656	3.71625	1.31203e-09
Btg3	59.408	3.7159	0.00144338
Amd-ps3	45.5337	3.71542	1.65937e-05
Sptbn4	27.9721	3.71113	2.24117e-08
Clca4a	15.0127	3.70986	5.78368e-07
Gm13067	13.0292	3.6997	1.58684e-07
Erbb3	69.4612	3.6953	2.92238e-09
4921536K21Rik	33.3751	3.69329	3.70114e-13
Klf5	911.993	3.69022	9.99016e-89
Fmnl1	6.07609	3.66765	0.0397168
Acmsd	84.3831	3.66572	4.72223e-23
Apol7d	28.8615	3.66317	2.58884e-14
Svop	24.5737	3.66058	3.81633e-08
Gm9750	83.5296	3.65692	3.40462e-22
Rassf6	30.4641	3.65036	1.72992e-06
Tmem71	6.05739	3.64963	0.00755448
Mill2	7.23658	3.63538	0.0132055
Ptprj	72.0627	3.63018	1.34162e-14
Frat2	305.788	3.63	6.7693e-48
Ano3	117.044	3.6299	6.03396e-39
Arhgap45	18.5664	3.62711	7.3323e-09
Clic3	21.7678	3.62415	3.2621e-11
Gm16702	278.18	3.61925	1.86891e-34
Mmp15	11.3276	3.61566	9.76594e-06
Slc1a7	20.647	3.6118	3.07801e-10
Cntfr	7.67095	3.61135	0.00013781
Dll4	13.8711	3.60391	7.36986e-07
Tpd52l1	5.15098	3.60388	0.00152676
Eda2r	1123.27	3.59548	7.03956e-50
Aloxe3	163.782	3.59001	8.2886e-28
Gria3	1179.23	3.57987	6.10166e-61
Nes	211.71	3.57873	1.33692e-11
NA	101.866	3.57496	1.9996e-35
Synpo2l	127.413	3.56925	4.72795e-13
Dbil5	14.3152	3.56366	1.38165e-10
NA	125.656	3.56136	3.83897e-18
Acta1	8.40078	3.5516	0.00424
Ccl6	20.1502	3.55118	4.63155e-05
Mreg	281.105	3.55078	5.94435e-22
Ccdc106	72.3699	3.5454	2.08476e-33
NA	324.8	3.54298	6.38513e-25
Traf3ip3	5.65411	3.53692	0.0298334
Ak7	5.83558	3.53318	0.00136541
Mgll	24.8496	3.53306	3.17727e-07
Pla1a	89.475	3.52142	1.04855e-15
Cavin2	13533.1	3.51384	7.32422e-27
Cxcl1	119.975	3.50901	1.35237e-17
Slc17a9	18.005	3.50683	9.05013e-06
Hist1h2bl	33.1839	3.49814	4.66673e-08
Ecscr	21.5515	3.49554	0.0188396
Tfap2b	5.18127	3.49004	0.0145488
Shank2	22.5862	3.48805	0.00124243
Plb1	53.1638	3.4848	5.2219e-15
Cystm1	169.287	3.48205	1.08131e-21
AU018091	5.2365	3.47877	0.0127288
Gm6133	18.6208	3.47286	1.95336e-07
Plaur	1149.59	3.4633	3.09278e-39
Stox2	10.8713	3.46318	1.60105e-06
Cdsn	1502.66	3.45855	1.68915e-50
Scn3a	16.9456	3.45636	7.19254e-05
Pkhd1l1	6.11466	3.44513	0.0165929
Pdzd2	406.351	3.44374	8.13038e-08
Vmn1r43	19.1844	3.43845	6.1902e-05
Car14	32.9969	3.43477	4.48063e-08
Dnah7a	5.72966	3.42963	0.0177761
Efhd1	6.47739	3.42776	0.00180677
Cryab	13202.5	3.42113	2.06417e-53
Gm12037	11.0513	3.41769	1.8535e-07
Dusp14	1099.25	3.41257	1.13982e-65
Ppm1h	131.711	3.39874	1.88623e-16
Cacna1b	7.34009	3.37344	0.0145488
Trim72	12.4588	3.36315	1.1648e-05
Gm12505	700.528	3.36027	1.76496e-24
Nrap	5.64632	3.35664	0.00930969
Vmn1r45	6.48979	3.34615	0.00055555
Chmp4c	13.4507	3.34311	6.71316e-07
Gm16998	21.0663	3.34208	1.38313e-10
Hes7	30.3535	3.34068	5.44726e-18
Htatip2	7.89252	3.34062	0.000847648
Anxa3	7482.76	3.33847	4.85452e-52
Gm38393	571.023	3.33722	2.24828e-29
Adgrd1	8.97435	3.33688	0.0031605
Tmem144	24.4305	3.33031	5.4283e-09
Usp17le	14.6759	3.32978	1.07955e-05
Lzts1	36.2712	3.32914	2.82161e-17
Gm27406	15.9308	3.32844	3.55308e-05
2200002D01Rik	188.591	3.32378	1.46198e-43
Vgf	80.4861	3.3176	9.18172e-25
Hist1h2bc	898.562	3.31584	1.21885e-15
Igf2os	450.391	3.31356	4.85058e-16
Gch1	62.9056	3.3111	7.66264e-19
Lnx1	47.5047	3.30962	8.02582e-12
Dyrk4	47.6637	3.30414	1.83216e-15
Dusp8	245.719	3.29932	6.00161e-27
NA	63.6267	3.29878	1.49527e-09
Gm23849	8.01641	3.2901	0.000939352
Stxbp2	15.114	3.28818	3.51148e-05
Diras2	135.873	3.28561	2.07075e-18
Pla2g5	14.7706	3.27618	0.00217559
Wnt9a	916.147	3.2718	4.84302e-47
Mab21l3	6.5462	3.27076	0.00267477
Gm16531	8.9146	3.26983	0.0251794
Lamc2	395.784	3.24719	9.50203e-35
Gm12415	16.9163	3.2403	5.46582e-08
Gpr39	133.086	3.23475	2.11118e-16
Gabre	296.546	3.23308	3.99035e-42
Cited2	5203.84	3.2256	4.64639e-124
Gm11380	56.6062	3.2225	4.74405e-16
Pgk1-rs7	137.628	3.22229	0.0320526
Il3ra	21.8702	3.22143	2.15747e-08
Prrt3	27.499	3.21996	4.54832e-12
Gm6166	5392.04	3.21684	9.46845e-65
Tmem266	7.99765	3.21621	0.00023518
H19	1822.87	3.21571	2.51364e-05
Prrt2	13.9941	3.21562	0.0161115
Mylpf	41.0963	3.21365	1.31262e-17
Gm11331	59.2267	3.19966	1.15828e-07
Gm11520	9.98397	3.19703	7.99164e-07
Ephx1	9309.26	3.19518	5.61894e-57
Klra1	6.79692	3.19155	0.0398959
Insl6	38.1948	3.1905	2.51536e-19
Ppp1r32	13.4553	3.18485	1.04407e-05
Hoxb6	11.0481	3.18162	0.000371082
Spns3	13.8364	3.18147	0.00021348
Mbp	219.51	3.17719	1.08423e-31
Fabp5	6643.32	3.17204	6.90458e-72
Kctd4	12.5247	3.15814	0.00118366
Disp2	132.671	3.1579	6.72866e-33
Nkpd1	5.18649	3.14902	0.0204236
Crabp2	68.1968	3.14627	1.53296e-18
Txk	7.53937	3.14368	0.0019624
Klhl40	24.7039	3.14286	4.56422e-10
Tg	42.0632	3.13757	2.22548e-05
Krt88	15.95	3.13325	4.84661e-06
Tmem37	109.536	3.12709	1.75924e-27
Ihh	7.21811	3.12145	0.000390372
Psrc1	2282.57	3.11023	2.16994e-41
NA	15.1542	3.10782	1.07523e-05
1700013F07Rik	7.10914	3.10711	0.00340219
Sh3tc2	46.0176	3.10564	4.07904e-13
Hist1h2ae	5.95294	3.10272	0.000993721
Cgn	236.025	3.0967	3.08102e-18
Smyd1	7.58711	3.09612	0.00168235
Gm11525	36.8013	3.09609	6.94186e-14
Shisa6	8.9042	3.09554	0.00230558
4930486L24Rik	435.539	3.09106	1.35945e-17
Ifit1bl1	78.35	3.08616	1.99695e-15
Tmem130	8.43132	3.08143	4.20112e-05
Chrnb1	351.149	3.07934	6.52107e-23
Arrdc4	1906.49	3.07854	1.46332e-19
Afap1l2	7.39197	3.07277	0.0258797
Plcd3	1876.45	3.07223	1.4554e-36
Thsd7b	12.2717	3.07049	0.000211101
Kank4os	15.9161	3.05985	2.9664e-06
Syt17	46.8465	3.05584	1.40539e-10
Prrg2	490.591	3.05485	7.53155e-40
Nrcam	42.6001	3.04837	1.56176e-11
Gdnf	878.659	3.04474	1.4745e-36
Cth	393.519	3.04368	3.01795e-06
Hes1	186.857	3.03254	2.75228e-09
2310061I04Rik	1207.43	3.0199	1.14367e-65
Clcnkb	11.326	3.01955	0.0108709
Snhg15	979.434	3.018	6.52705e-48
Mmel1	15.8091	3.01654	2.31724e-07
Ngf	909.539	3.01333	2.96024e-44
Brsk2	7.69045	3.00282	0.000638239
Apob	19.0315	3.00067	0.00103938
4933406C10Rik	13.8313	2.99975	3.07334e-07
Gm14057	34.7491	2.98877	1.94913e-14
Gm13713	5.07248	2.98451	0.0369351
Gm26867	112.232	2.98073	3.46583e-14
Fgd6	331.605	2.97806	1.63147e-28
NA	5.21045	2.97702	0.00485681
Trpm1	12.5995	2.97676	2.25647e-06
Cd96	6.04585	2.95615	0.00108055
Ankrd1	4164.1	2.9559	4.17635e-20
Slco3a1	1020.79	2.94158	1.72868e-61
Cbx3-ps7	16.1464	2.93918	2.84462e-05
Myrfl	5.47279	2.93888	0.00726812
Dusp18	16.5537	2.93747	7.47482e-05
Rhpn2	103.224	2.932	1.26524e-16
Gm6311	19.5835	2.92913	0.000304955
Lmntd2	7.73438	2.92848	0.000674103
Prickle4	8.01411	2.92555	0.000178084
Myh11	10.2782	2.92265	0.000905967
Pde1c	5.53648	2.92171	0.0097075
Spdef	6.00928	2.91846	0.00234066
Eif2c5	9.61856	2.91611	0.0284568
Efcab8	17.7495	2.91232	7.3563e-06
Rspo4os	11.5071	2.91154	1.32915e-05
Pvr	3501.59	2.90206	1.64561e-59
Lrrn4cl	2335.88	2.89717	7.60075e-23
1700028J19Rik	26.7202	2.88818	2.32799e-12
Gm26651	25.6122	2.88273	3.50696e-06
Cpz	10.4857	2.8755	0.00307771
Map3k9	11.5342	2.87371	0.000803332
Gsdmc4	5.21948	2.87068	0.00211092
Arhgef28	758.863	2.86963	4.65813e-60
3830403N18Rik	23.8022	2.86779	3.44161e-10
Snord55	6.83401	2.86763	0.000530117
Fas	523.474	2.86618	7.20303e-38
Vpreb1	24.2958	2.85869	2.82832e-13
Camk2a	97.0639	2.85817	1.57047e-13
Kcp	5.25636	2.856	0.00385058
Hspb2	59.2804	2.85564	4.17539e-22
Txlnb	29.588	2.85122	5.28311e-07
Aaas	2372.65	2.85084	5.846e-32
B4galt4	584.345	2.84974	4.00857e-82
Cyp2c55	890.339	2.84969	1.70665e-46
Trap1a	12.3381	2.84469	0.000206104
Ppp1r18os	8.82965	2.84402	4.48342e-05
Rapgef3os2	8.64117	2.83908	0.00107705
Eno3	744.512	2.83587	5.28177e-22
Stard8	6.07483	2.83176	0.022972
Catsperd	26.5426	2.82734	6.10898e-08
Hoxb3	9.19371	2.82619	0.00146113
Pla2g4b	67.6178	2.82434	2.82843e-08
Vmn1r40	12.07	2.81675	0.00113661
Papss2	2566.38	2.81554	4.90967e-79
Cgnl1	1941.4	2.81102	1.55749e-15
Arl4d	342.751	2.81001	5.1913e-18
Igf2bp1	2960.66	2.80469	2.14227e-181
Lrrc75a	924.749	2.80458	4.2731e-95
Hist1h2ac	24.7419	2.80251	2.59419e-06
Fam71f2	47.8792	2.80208	4.67573e-09
Hbegf	543.538	2.80197	4.94472e-31
Gdf5	22.5718	2.80176	7.24386e-05
Dglucy	1002.1	2.80145	2.38183e-48
Klra2	109.477	2.79948	2.60156e-13
Hoxb3os	9.4246	2.79913	0.00479836
E130218I03Rik	17.7344	2.79578	0.000678589
Hist1h2bk	54.9734	2.79479	4.1938e-06
Colec11	15.1532	2.79262	1.68474e-05
Zfp341	461.723	2.78984	7.10463e-39
Dennd2d	8.9194	2.7871	0.00785403
Igf2	11022.7	2.78587	5.71693e-06
Olfr1318	12.8938	2.78394	0.000654985
Heph	11.4374	2.77135	0.0018042
Cfap57	7.19103	2.77033	0.00131429
Parvg	9.60611	2.77008	0.00238758
Ddah1	1706.49	2.76719	2.45422e-22
Ddias	367.242	2.76552	5.68014e-13
Stbd1	242.833	2.76527	3.58184e-27
BC051665	8.5578	2.76249	0.000450075
Stc2	605.894	2.75752	1.11083e-22
Gm12185	28.3835	2.75396	2.17838e-05
Gm11944	37.0662	2.74707	6.27355e-12
Avpi1	1533.79	2.7461	1.4174e-84
Gm26574	14.5484	2.7447	1.26599e-05
Bcar3	810.138	2.74147	1.45281e-42
Hacd4	175.973	2.74096	9.65699e-18
Tnnt2	43.7598	2.7353	6.63635e-05
Grb14	1511.86	2.73467	5.23181e-32
Prss36	320.862	2.7321	1.72196e-34
Zfp941	7.94307	2.7286	0.00611402
Hist2h2aa2	243.085	2.72173	1.72971e-08
Pnpla2	1540.39	2.71998	1.19306e-41
Susd2	15.1337	2.71263	0.0095374
Procr	826.051	2.70721	2.49506e-38
Hyal3	30.5649	2.70585	5.57797e-08
Nfam1	6.77098	2.70494	0.00348424
Gipc2	16.0911	2.70339	3.8596e-06
Gpr68	23.12	2.70333	6.44706e-06
Platr14	62.6936	2.70167	1.64921e-15
Lipg	535.173	2.70032	2.69387e-35
Nectin1	1412.4	2.6983	5.20816e-56
Apol9b	84.642	2.69648	2.94604e-11
Flnc	35973.8	2.69496	1.71331e-57
Pim3	2043.37	2.69457	1.68414e-31
Gm26885	5.43663	2.69403	0.00498783
Gm12138	2019.19	2.68909	5.73955e-19
NA	5.722	2.68804	0.000784487
Gm17090	14.7525	2.68785	0.000650612
Ifnlr1	8.94873	2.68604	0.0215865
Bmp6	5.90151	2.68442	0.0101204
Tnfrsf10b	1728.08	2.68382	1.46544e-49
Sema6b	29.711	2.6807	9.707e-08
Matn3	9.12213	2.67837	0.000787007
Ass1	199.832	2.67825	4.80652e-23
Gm6292	5.54976	2.67758	0.00508398
Gm16166	9.03589	2.67686	0.00225975
Tigit	30.288	2.6735	3.494e-09
Tbc1d2	1016.92	2.67209	2.32033e-33
Gm10639	17.1434	2.66718	8.4207e-05
Cst6	60.2186	2.66629	1.36559e-09
Gja1	1405.95	2.6633	1.78861e-15
Btg2	1025.67	2.66177	4.52939e-20
1110002E22Rik	5.89952	2.66034	0.0409039
Gm11642	21.1304	2.65426	4.71181e-09
Otud1	340.362	2.65274	5.3419e-36
1700125H20Rik	6.1123	2.63971	0.00216104
Bbc3	624.09	2.62907	6.1942e-41
Serpina9	31.4217	2.62748	3.00674e-08
Aqp5	257.823	2.62384	1.20947e-17
Muc2	8.80912	2.62352	0.000526839
Cstl1	15.0012	2.62297	4.53037e-05
Rbmy	70.4737	2.61742	5.19078e-05
S100a11	28004.5	2.61617	9.41309e-36
Ica1	26.0975	2.61539	1.89554e-05
Gm26397	15.375	2.61258	8.92105e-06
Asns	8358.73	2.61241	3.12579e-32
Erc2	648.41	2.6124	1.91769e-53
Gm10499	78.6602	2.61053	7.47775e-22
Inka2	122.816	2.60921	4.48617e-10
Atf3	486.708	2.60534	1.42647e-34
Dlc1	2597.47	2.6034	9.88074e-61
4833427G06Rik	113.596	2.59875	2.26248e-28
Jmjd7	318.036	2.5967	8.23235e-36
Akr1b3	27184.1	2.59374	2.08261e-16
Tmem43	6334.66	2.59317	1.24126e-41
Gm10230	10.1898	2.59098	0.0318305
Gm26708	7.91283	2.58944	0.00327573
Atg16l2	1186.28	2.58918	6.66309e-18
Fam110a	459.328	2.58491	1.24944e-26
Fam71f1	49.3539	2.58372	2.34164e-08
Steap1	1193	2.58107	1.70489e-18
Ms4a4d	289.801	2.57887	2.14121e-09
Gtse1	869.287	2.57851	2.76154e-13
2310043M15Rik	5.02573	2.57594	0.0382349
Gm15694	10.9593	2.57114	4.3239e-05
Plcxd2	1602.48	2.56975	7.70004e-54
Rin1	4778.35	2.56714	1.9735e-66
Podnl1	3817.28	2.56435	1.34949e-57
Cfap43	26.3488	2.56424	1.87338e-05
Cltb	2400.27	2.56232	4.59959e-39
Dgat2	90.8686	2.55851	1.69462e-18
Ehd1	9278.79	2.55801	1.82132e-45
Zfp36	1397.59	2.55527	2.97876e-15
Gm15264	33.1505	2.54948	6.73376e-09
Jag1	1491.58	2.54333	2.48154e-27
NA	5457.01	2.54173	1.35588e-14
Rhox5	444.766	2.54009	4.72935e-21
Ttll7	695.451	2.53993	3.81266e-41
Angptl6	251.31	2.53722	1.02655e-24
Gm13285	29.5364	2.5369	4.60781e-08
Usp2	268.407	2.536	1.16184e-14
Prss23os	1155.33	2.53566	1.3995e-22
Kcnab3	152.166	2.5345	6.68216e-21
Ablim1	3555.85	2.53165	2.41932e-35
1110046J04Rik	236.266	2.53134	2.55577e-22
Has1	15.9996	2.53086	0.00501495
Foxf1	338.94	2.5285	6.12957e-61
Gm12254	5.36025	2.51977	0.0334597
Slco2a1	4121.36	2.51863	3.84123e-49
Fhl1	107.271	2.518	6.70609e-06
Patl2	5.17127	2.51498	0.0154758
Tslp	20.9833	2.51259	0.000178442
Cct2	26032.4	2.51076	2.31758e-82
Mst1	6.56499	2.50823	0.0033362
Plac8	10.1334	2.50381	0.0012552
Abcb1b	1465.6	2.50367	9.35434e-51
Cep295nl	32.7266	2.50347	1.32585e-10
Maff	1125.07	2.50118	2.53873e-24
Apold1	41.2477	2.49759	2.79335e-13
Nomo1	5376.94	2.49354	1.86597e-40
Gm5570	6.54343	2.49203	0.0129659
Adgrg6	18.6663	2.49103	0.000184099
Egln3	507.425	2.4906	3.9221e-40
Rpl12	5438.52	2.49027	3.57808e-30
Gm13981	7.33767	2.48824	0.00230558
Gm14760	24.3093	2.48698	0.000344526
Gm5106	7.07986	2.48578	0.00768567
Klf10	2846.2	2.48194	2.2963e-18
Cep72	201.861	2.47879	1.1447e-34
Fap	55.2208	2.47818	5.64892e-05
Lrrc31	14.7314	2.47652	0.00729061
Npr3	1290.29	2.47391	1.12366e-09
Oplah	158.757	2.47278	2.23492e-20
Kcnu1	19.0465	2.47213	0.00113586
Lrp2bp	10.0251	2.4708	0.000418917
Gm4654	5.85885	2.46468	0.00371433
Pfkfb3	882.241	2.46372	3.98472e-18
Aqp6	6.59685	2.46345	0.00720169
Pram1	33.2473	2.4625	0.000172165
Gm26543	9.39539	2.45478	0.00401078
Higd2a	2214.02	2.45457	6.64608e-72
Prdx6	12709.3	2.45349	5.09494e-39
Gm16170	35.3825	2.45325	2.0969e-07
1700047I17Rik2	769.112	2.44909	6.02339e-61
Per1	5421.88	2.4486	7.57643e-17
Adgrf5	8.0508	2.44761	0.040828
Plch2	6.80368	2.44545	0.0196271
Piwil2	15.3765	2.44522	0.00205977
Soat2	50.1027	2.44189	1.10435e-08
Hist1h2bq	18.5108	2.44125	0.00212292
Hspb6	825.736	2.44041	1.31786e-22
Nlrp4e	17.5464	2.43858	0.00589336
Unc5c	5.83703	2.43465	0.0181984
Plk2	10524.6	2.43169	6.19312e-65
Rpl3l	10.455	2.43141	0.00481951
Nhej1	239.237	2.42398	1.17485e-28
Gm26809	35780.5	2.42389	4.98946e-15
Rmrp	8.64383	2.42339	0.0137781
Mafk	2125.93	2.41982	5.19673e-29
Lyrm9	234.522	2.41793	3.4852e-21
Rps2-ps6	64.9768	2.41728	1.60096e-09
Bst2	1204.43	2.41442	2.64436e-21
Nectin4	8.83963	2.40977	0.00519378
C130074G19Rik	6.26789	2.40625	0.00447983
St18	9.87711	2.39914	0.00910993
Nhlrc2	1888.9	2.39853	4.9906e-116
Jag2	9.33033	2.39649	0.000456838
Crx	15.3876	2.39614	0.00365211
Cnn1	11.1513	2.38869	0.000294435
Gm15246	19.6545	2.3877	5.02765e-06
Gm1141	15.3311	2.38569	7.78947e-05
Abca7	2260.68	2.38354	1.95585e-49
Gm6139	18.0661	2.37829	0.000299959
Il15ra	123.638	2.37765	3.74091e-12
Itga6	3086.58	2.37743	8.77433e-54
Tspan13	14.977	2.37668	1.66382e-05
Serpini1	53.6256	2.37517	1.43744e-13
Hspbap1	670.334	2.37127	2.17949e-71
Gm11599	19.4868	2.37115	1.83454e-05
Lenep	70.2866	2.37075	3.56835e-06
Slc35e4	1871.81	2.37027	9.92568e-33
Pcdh12	5.12989	2.3699	0.0154611
Hcfc1r1	8234.32	2.36979	5.85349e-29
Uck2	2613.5	2.36766	6.53789e-49
Hecw2	21.5744	2.35827	0.0139248
Tlr1	42.2317	2.35812	2.29375e-09
Hist1h2al	73.645	2.35771	5.08202e-09
Odc1	6015.14	2.35472	5.94842e-66
Tuft1	1030.06	2.35222	3.86509e-27
Golga7b	16.5421	2.35145	7.12824e-05
Grin3a	5.74326	2.34603	0.0188214
Glns-ps1	14.7089	2.34539	9.92399e-05
Dnah6	60.0058	2.34414	1.31773e-09
Fry	21.3299	2.34347	4.78278e-05
Ltc4s	33.9005	2.34222	3.48974e-05
Ccdc180	8.66808	2.34014	0.0311635
Als2cr12	58.853	2.33366	3.02365e-09
Ccng1	10250.7	2.33017	2.1901e-51
Rras2	2707.73	2.33014	3.06138e-36
9130008F23Rik	333.961	2.32946	9.03208e-29
Ccdc78	27.3555	2.32864	3.6716e-08
Slc43a3	2964.66	2.32149	6.46133e-21
Ndufaf6	307.056	2.31948	4.30225e-33
Rgs17	87.0002	2.31781	1.18173e-09
Pnkp	1016.33	2.31707	1.72632e-51
Cgref1	204.551	2.31445	7.17424e-21
Adrb2	121.655	2.30877	6.53928e-20
Lta	33.8405	2.30767	4.1704e-08
Acox2	9.84335	2.30528	0.00928514
Fstl3	1713.82	2.30524	3.70416e-29
Pbld2	34.8622	2.30052	1.3113e-05
Thoc6	1074.78	2.29644	3.30005e-52
Kif5a	70.9254	2.29407	1.92294e-09
Ikzf2	190.722	2.29368	2.46502e-09
Tnnc1	109.152	2.29305	3.79593e-19
Ace2	6.18265	2.29179	0.0090948
Eif3d	11371.2	2.29092	3.87075e-45
Klf4	2396	2.29026	3.46698e-36
Aph1b	607.012	2.28999	8.6238e-40
Nfkb2	5751.41	2.2868	4.61982e-43
Esd	14951.2	2.28508	8.86735e-40
Dyrk3	209.797	2.28343	9.99417e-28
Usp17la	30.3176	2.28131	3.1119e-07
Mfge8	10440.9	2.27845	1.53556e-27
Alx4	5.88386	2.27727	0.01251
D630029K05Rik	40.7902	2.27629	1.87562e-08
Lag3	35.7173	2.27273	1.80154e-08
Pmm1	3567.22	2.27249	5.85743e-36
Mslnl	8.19116	2.27193	0.00605766
Gm25053	5.00441	2.27149	0.0152401
Tspan9	8905.53	2.26619	5.73381e-46
Thy1	3489.69	2.2649	2.71746e-28
Slc9a3r1	541.036	2.26268	9.41101e-22
Styk1	452.367	2.25985	3.01633e-14
Dlk2	145.183	2.25973	4.79668e-10
Epha2	1944.11	2.25901	2.17737e-14
Fitm2	1939.48	2.25875	2.14405e-41
Phactr2	110.901	2.25777	5.92244e-09
Mcub	378.097	2.25768	4.17738e-28
Gm16062	85	2.25704	2.36561e-10
Igfbp6	10099.9	2.25644	5.1672e-33
Slc1a2	18.6491	2.25643	0.0242141
Mycl	20.2114	2.25483	0.00033284
Nyap1	908.685	2.25262	6.46347e-29
2019-09-05	7626.58	2.25245	4.50548e-41
Optc	22.3132	2.25226	2.39124e-05
Synpo2	219.909	2.25037	3.56191e-18
Ap2a2	11186.2	2.24953	2.32914e-72
AA467197	26.5667	2.24651	9.45624e-08
Map3k20	2221.02	2.24561	4.12015e-59
Syngr4	10.8753	2.24542	0.00143228
Gm27206	7.5617	2.2446	0.00363866
Clpb	1889.54	2.2435	2.04229e-28
Lgals9	3984.47	2.2418	5.16778e-39
Slc43a2	56.2889	2.24073	1.33629e-06
Amotl2	15490.2	2.24015	6.9345e-36
Tnfrsf21	266.515	2.24001	3.54269e-25
Nabp2	2302.58	2.2388	9.81633e-47
Prr11	1150.45	2.23492	6.46412e-15
Pdgfb	7.20281	2.23475	0.0479814
4933427I04Rik	39.5447	2.23252	1.17071e-09
Gm15708	52.2114	2.23122	8.04004e-10
Tmprss6	29.4034	2.22559	0.00010013
Amy1	9.16465	2.22342	0.00485215
Il11	23.3421	2.22097	2.44799e-07
Blvrb	2497.9	2.21793	1.96572e-35
Sorbs1	833.086	2.21671	2.40329e-35
Rps2-ps10	66192	2.21624	1.04949e-48
Gm10291	6.77228	2.21498	0.0157786
Spire1	861.397	2.21456	2.8062e-42
Brsk1	879.023	2.21187	1.62267e-39
Ybx3	12605.6	2.21115	2.63675e-44
Pold4	1270.66	2.20825	9.59355e-27
Nek2	1268.79	2.20634	7.73166e-13
Selp	38.6398	2.20423	0.0124287
Muc13	7.74344	2.20082	0.00804644
Arl14epl	50.5468	2.19889	3.03286e-10
Alkbh2	215.756	2.19763	9.04791e-40
Emx2	282.5	2.19669	5.17153e-19
Pgf	5.84826	2.19581	0.0306082
Stambpl1	1280.98	2.19504	8.14476e-36
Rpl10a	10385.2	2.19318	2.28546e-23
Gm6736	924.298	2.19092	4.0589e-10
Wwc1	1254.51	2.19032	8.29029e-20
Taldo1	5508.67	2.18854	1.33244e-32
Dusp1	2323.36	2.18854	2.94874e-13
Ulbp1	1078.85	2.18653	1.03379e-16
Cd74	18.4667	2.18623	0.00800112
Rnf43	74.7715	2.18594	1.64832e-09
Tuba1b	52546.5	2.18567	5.4939e-16
Hecw1	7.38388	2.18557	0.00856659
Pcsk4	254.378	2.18504	1.63944e-37
Grk5	918.525	2.18434	3.40618e-19
Wdr45	2171.77	2.18139	1.37483e-42
Mif	7576.74	2.17921	3.46124e-31
Gm15730	7.29256	2.17908	0.00463859
Gm15541	42.6485	2.17849	1.22511e-10
Kcnj15	706.135	2.17836	1.20097e-09
Snupn	481.367	2.17766	1.88062e-93
Relt	217.473	2.1764	8.0162e-26
Stim1	2475.82	2.17534	4.0122e-47
Fbxo15	9.25004	2.17234	0.00789175
1700015F17Rik	5.54917	2.16865	0.0227011
Sphk1	627.953	2.16762	2.04927e-13
Gm2a	1019.03	2.16563	1.01574e-41
Prss23	12096.7	2.16551	2.39708e-39
Ppfia3	146.669	2.1644	1.10024e-21
Eef2	390506	2.16101	3.15894e-25
Fendrr	16.4166	2.1592	0.00110424
Gm14659	5.05122	2.15906	0.0459615
Plekhn1	640.735	2.15841	1.54559e-17
Gm10566	25.438	2.15495	3.66106e-06
Tubb4a	66.1147	2.1543	5.38275e-14
Fam189b	38.7043	2.15362	3.36151e-07
Lrwd1	1708.04	2.1503	4.06099e-37
Rab11fip1	1416.02	2.14949	5.69676e-36
C3ar1	28.4568	2.14861	0.00218449
Gm5620	281.541	2.14765	1.44424e-09
Gm10420	383.052	2.14504	3.83783e-18
Pfkp	1611.63	2.14377	4.24011e-23
Myo1g	7.06017	2.13976	0.0473886
Tmem132b	17.5317	2.13936	0.00669842
Gm16982	30.2646	2.13933	6.05912e-09
Ccdc9b	3998.15	2.1345	1.1487e-66
Inafm2	1281.57	2.12724	2.83738e-95
NA	13.1109	2.12648	0.00101266
Gpank1	589.397	2.12589	5.53081e-19
Prps1	1657.91	2.1249	1.20748e-40
Gm11263	10.2203	2.12487	0.000807236
Mtfr2	211.422	2.12373	4.98362e-08
Rras	2672.58	2.12279	6.1514e-27
Ppp1r2-ps4	7.02067	2.12264	0.0221357
Pstpip1	90.413	2.12165	1.15897e-09
Tmem245	7288.01	2.11806	7.16939e-53
Chn2	8.32244	2.11617	0.0335053
D630023F18Rik	6.98901	2.11523	0.0479814
Cacna1g	708.8	2.11052	4.57229e-08
Zfas1	5923.01	2.10843	1.98131e-20
Rps2-ps13	65962.3	2.10456	8.44455e-44
Txnip	34226	2.10321	9.43568e-06
Gm15510	5.6279	2.10282	0.0355272
Mief2	738.724	2.10253	3.76338e-30
Nuak2	683.313	2.10252	1.84876e-30
NA	10.8783	2.1023	0.0172061
Atp8b5	13.2202	2.10186	0.00403816
Hspa12a	126.854	2.10137	1.2963e-17
Mfap3l	581.845	2.10117	1.30337e-16
Dcxr	824.751	2.10014	1.52636e-19
Rusc2	4030.03	2.09837	8.96398e-20
Gss	1651.84	2.09761	1.21795e-29
Fat1	9394.68	2.09401	4.33028e-22
Dele1	1859.41	2.09227	5.09304e-30
Exoc6	416.782	2.09105	6.22176e-27
Gm5921	644.89	2.09034	3.59685e-25
Ptgis	3691.45	2.08898	3.53095e-20
Ggct	110.657	2.08877	3.65475e-13
Cd151	4413.73	2.08872	2.02233e-44
Hist1h1d	29.1634	2.08326	8.38925e-06
P2ry6	8.54463	2.08322	0.0479824
Slmapos2	3326.36	2.08142	2.98851e-14
Tspan15	23.8425	2.08115	0.00503672
Glul	897.371	2.08077	5.16316e-16
Rpl13a	71987.7	2.0802	4.71682e-27
Rps2	1054.56	2.07586	8.68735e-29
Rasgrp3	117.912	2.07337	3.90617e-14
Reep6	146.638	2.07193	2.73234e-21
Gm11884	8.16574	2.06996	0.0138256
Ctps	9423.68	2.06843	1.15226e-35
Stard13	1677	2.06589	1.14073e-11
Gm16061	14.2603	2.06518	0.0121418
Sord	8476.14	2.06478	8.28334e-18
Gm6410	85.2821	2.06437	4.04233e-13
Ndufs2	12117.4	2.06423	2.39582e-43
Gm7665	5.93822	2.06235	0.0240465
Gm12933	53.051	2.05925	3.69737e-06
Mucl3	111.714	2.05862	1.47534e-12
Slc6a15	33.4923	2.05822	0.00027943
Hcrtr1	11.6373	2.05816	0.00102515
Lrrc1	506.016	2.05755	5.85252e-35
Ier3	749.798	2.05742	1.53059e-17
Upk1a	25.379	2.05735	2.87509e-06
Zfp286os	14.2589	2.05696	0.000107483
Trac	20.1752	2.05532	0.000102535
Itpkc	1053.76	2.05466	1.12972e-22
Cdkn2d	517.371	2.05349	3.01793e-16
Lama2	873.841	2.05309	2.52675e-12
Gm11427	43.6166	2.053	1.82539e-07
Cfap100	434.407	2.05215	2.48722e-15
Vps36	2824.13	2.052	1.98447e-88
Cdkl1	21.1172	2.0515	0.000171969
Fam241a	67.4537	2.0514	2.29782e-15
Dbhos	23.8002	2.05116	3.57066e-05
Gfer	1246.8	2.05054	2.11733e-40
Nlrp4f	12.241	2.04906	0.00513621
Nmnat1	220.61	2.04873	6.1538e-45
Nrm	626.762	2.04559	2.55683e-13
Ezr	2125.96	2.04455	6.47545e-48
Ppp1r15a	3481.36	2.04315	4.79383e-35
Slc25a25	821.544	2.04314	4.0724e-17
Cdk18	2832.68	2.04144	7.36013e-25
Wdr12	1978.77	2.04112	1.17827e-47
Gm11496	7.0416	2.03757	0.0247458
Pcdh9	103.423	2.0363	3.87312e-07
Ints12	1233.99	2.03502	5.33758e-32
NA	7.03501	2.0302	0.0194793
Cdiptos	63.1405	2.02893	1.75454e-09
Ube2c	1898.38	2.02838	1.04614e-10
Cct4	19364.5	2.02766	4.22489e-67
Unc13d	41.0409	2.02681	1.89878e-08
Pde8b	714.994	2.02657	1.47352e-20
Elp6	429.594	2.02618	7.55374e-29
Arrb2	918.812	2.02573	8.22585e-34
Pdlim7	2855.18	2.02566	2.19899e-38
Tob1	562.354	2.02413	3.76782e-22
Map6	3232.03	2.02381	8.61847e-31
Snhg6	1874.93	2.02224	4.80384e-20
Wt1	33.018	2.02114	0.00280258
Dbndd2	321.974	2.02104	2.46373e-17
Nop53	8144.38	2.02026	5.35888e-18
Tfec	10.9954	2.01817	0.0390069
Aen	3318.37	2.01611	8.8025e-26
Ttc41	109.454	2.01556	5.41488e-11
C1qtnf2	17.2784	2.01499	0.000330284
Cdh17	219.837	2.01499	1.16779e-24
Trim12a	37.332	2.0117	4.38426e-07
AW047730	11.9843	2.01025	0.027192
Gm15228	7.64746	2.01001	0.0128924
Glrx3	6612.61	2.00885	3.89062e-47
Gm26788	40.9635	2.00798	2.38387e-09
Gm27021	16.6205	2.00615	0.000328925
Gm4609	20.1689	2.00521	0.00092818
Slc4a4	911.507	2.00465	7.42615e-17
Nalcn	35.6845	2.00409	0.000221665
Mfsd9	752.609	2.00206	2.066e-39
Aph1c	281.884	2.00167	5.58064e-17
Pbx4	103.308	1.9992	9.43522e-17
Gm10169	48.9051	1.99877	2.12107e-06
A630095E13Rik	9.98393	1.99716	0.0154818
Gm7334	682.963	1.99687	2.33642e-47
9930111J21Rik2	470.863	1.99664	1.11882e-08
Tpd52	282.175	1.99378	1.28575e-14
Noc2l	3844.88	1.99356	2.16166e-55
Gramd1a	2969.75	1.99218	1.6977e-19
Zfp428	275.33	1.9919	7.17454e-29
Phactr4	1891.98	1.98739	5.49055e-31
Faf1	5358.73	1.98485	9.07278e-66
Spata5l1	220.823	1.98403	3.43189e-14
Nmnat3	174.672	1.9837	1.21633e-18
Tc2n	5.4235	1.98296	0.0340473
Synb	17.5918	1.98251	0.00231634
Ckap2	2101.54	1.98103	3.82337e-11
Gm10293	22.8418	1.98093	2.17223e-05
Gm3376	148.22	1.97992	9.69439e-10
Thpo	50.8452	1.97985	3.26006e-07
Abcc12	7.63866	1.97828	0.019158
Gjc2	6.21039	1.97624	0.0296931
Gm11518	16388.7	1.97621	8.1815e-34
Rpl8	66813.6	1.97597	3.12608e-32
Cnbd2	352.58	1.97589	2.25967e-15
Chrm1	15.2512	1.97501	0.012304
Kctd13	656.92	1.97398	6.22873e-21
Limk2	1846.81	1.97141	7.34145e-51
Gm16253	14.9915	1.97133	0.000109113
Zfp809	553.77	1.97084	6.7226e-29
Pidd1	231.843	1.96925	1.17293e-11
Myo1c	17434	1.96902	2.00358e-45
Ahr	292.299	1.96755	3.06419e-17
Sp2	1110.54	1.96689	1.02276e-21
Poln	47.9599	1.96668	1.62954e-06
Dynlt1a	769.809	1.966	4.77571e-26
Arvcf	1255.27	1.96357	3.99035e-42
Psmd4	6484.29	1.96261	2.11543e-31
Adipor1	9075.21	1.96187	1.05681e-34
Efna1	1322.87	1.96047	1.05488e-10
Gcnt3	16.2547	1.95968	0.00113854
Tubb3	51.3541	1.9585	1.46597e-05
Cyp2s1	8.77257	1.95744	0.0410156
NA	59602.8	1.9559	1.73631e-45
Cmip	3604.49	1.95522	4.01823e-53
Hsf2bp	28.1603	1.95425	7.94517e-05
Gm11687	35.3526	1.95323	6.28428e-07
Btnl7-ps	9.5548	1.94891	0.00443019
Clk3	1992.49	1.94624	3.98031e-34
Zbtb7b	2933.13	1.94564	6.4336e-27
Htr1b	5.21266	1.94486	0.0435037
Rnf128	22.0282	1.94187	0.00529142
Car6	110.811	1.93903	0.0045322
P2rx3	1054.95	1.93802	0.000115073
4933438K21Rik	20.6102	1.93711	0.000159056
Cd93	188.258	1.93668	9.84664e-07
Ctc1	2558.24	1.93655	3.83466e-15
Klrg2	65.682	1.93641	2.65231e-10
Rhbdd1	2472.9	1.93427	2.32895e-36
Gm12091	282.241	1.93323	1.24102e-08
Usp3	2309.15	1.93224	1.76324e-20
Ttc21a	7.5525	1.93109	0.0420165
Fam220a	353.537	1.92869	2.30488e-05
Arl5c	11.2525	1.92648	0.00245978
Sync	42.3306	1.92269	4.73191e-07
Myl12a	24114.2	1.92263	4.53187e-47
Rab3c	286.38	1.91994	1.46658e-05
Psmd8	7697.48	1.91895	3.8392e-25
Atp6v0e2	330.967	1.91842	4.05408e-09
Rrm1	7755.01	1.91737	7.84319e-15
9230111E07Rik	13.9676	1.91655	0.00108263
Stk32c	7.69142	1.91599	0.00611949
Ptprf	4297.63	1.91527	8.89941e-99
Pef1	4262.68	1.91527	3.11323e-27
Zfp143	1097.91	1.91525	3.62677e-38
Hspa8	63221.4	1.91468	1.43564e-46
Kcmf1	5176.9	1.91387	1.63445e-69
Dennd5b	74.3048	1.91235	1.45691e-05
Entpd1	10.4057	1.91138	0.0129671
Fam110c	419.383	1.91059	1.56903e-19
2310022A10Rik	765.783	1.91025	6.32804e-30
Gm28042	211.213	1.90684	3.83808e-10
F11r	12.5259	1.90645	0.014653
Chst7	291.627	1.90568	1.11934e-15
Mocos	401.673	1.90564	2.63818e-27
Hagh	1322.18	1.90231	2.26957e-45
Syn3	37.6547	1.90143	0.000250609
Mras	3862.45	1.9005	4.27338e-28
Nppa	6.94284	1.89983	0.0354379
Gpat3	333.521	1.8993	6.16902e-17
4933417D19Rik	27.8523	1.89923	0.000101031
Gm10481	14.1271	1.89748	0.00159848
Syn1	1096.84	1.89561	4.37182e-38
Smg9	787.712	1.89552	3.55283e-28
Utp4	3049.02	1.89517	2.22057e-42
Gm14471	11.3453	1.89482	0.00900033
Gm23969	8.05661	1.89445	0.0211772
Ifrd1	4709.93	1.89308	3.49102e-21
Gm14494	1272.81	1.89248	4.67766e-14
Dlgap4	3400.88	1.89081	3.20294e-26
Pycr2	1798.03	1.88839	3.49178e-44
Arhgap19	667.757	1.88634	7.957e-11
Gm9726	134.082	1.88553	1.91931e-10
Dusp9	278.676	1.88532	2.78831e-10
Nr4a1	921.089	1.88344	1.90692e-06
Me3	835.395	1.88333	3.0096e-30
Adora2b	955.538	1.88236	2.76457e-25
Pdgfa	1217.55	1.88127	3.46124e-51
Kifc5b	429.922	1.88079	1.12907e-09
Acot2	886.342	1.87994	1.45133e-23
Klhdc8a	1128.7	1.87792	1.27204e-10
Lysmd1	338.131	1.87441	1.00521e-30
Rpl18	36466.2	1.87179	5.22386e-26
Snrnp48	727.375	1.87118	1.43245e-28
Dapk3	1412.1	1.87074	4.29154e-28
Snord83b	17.5634	1.86915	0.00179401
Mgam	514.757	1.86638	0.000155552
Atxn10	13554.5	1.86489	1.27318e-33
Sgms2	1191.81	1.86481	4.90789e-38
Adcy1	1520.54	1.8643	6.95842e-13
Gmds	1941.41	1.86251	3.28159e-41
Pttg1	1028.15	1.85983	5.67238e-14
Gm26825	36666	1.85701	2.84236e-35
Gm13394	70314.7	1.85698	2.8741e-29
Arid3a	862.628	1.85674	3.65451e-19
Gm13832	8.69972	1.85604	0.0144996
Rnf169	1270.19	1.85498	1.01442e-24
Tspan33	25.3226	1.85481	0.000324031
Rdh9	51.9867	1.85365	3.82303e-05
Chfr	2461.95	1.85256	8.28358e-29
2010015M23Rik	28.6583	1.85219	0.000126212
Sqor	2866.17	1.85205	4.05299e-52
Ly6i	6.09454	1.85156	0.0455229
Mpi	945.575	1.85121	1.53344e-29
Flt1	1329.71	1.85106	4.66835e-54
Rasa4	4237.67	1.85059	4.39933e-29
Loxl4	984.285	1.84911	3.29006e-13
Tmprss11d	8.31346	1.84816	0.0126012
Kars	8104.3	1.84706	3.14458e-41
Palm3	21.3394	1.84579	0.0252518
Ide	5488.79	1.84428	1.05956e-40
Dus3l	1405.01	1.84177	6.03455e-41
As3mt	32.983	1.84018	0.00044502
Csnk1e	4058.99	1.83865	2.19412e-68
Gm16577	5.33035	1.83767	0.0482025
Thap1	316.451	1.83756	3.89948e-19
Serpinb9	1571.53	1.83624	3.54745e-31
Mdm2	3807.44	1.83535	5.57044e-39
Abcb6	523.639	1.83487	2.03604e-24
D6Ertd527e	17.7753	1.83341	0.00569164
4921524J17Rik	641.611	1.83319	5.74317e-47
Gm6316	9.35818	1.83078	0.0186804
1700061G19Rik	8.01976	1.83062	0.0082653
Rpl28-ps1	40054.7	1.83062	8.65341e-18
Rpsa	106522	1.82928	1.41903e-23
Ttc1	1980.79	1.82893	7.13375e-44
Ipo5	14120.8	1.82517	6.70152e-46
Pik3cb	1633.02	1.82457	1.05174e-28
Creb3l3	9.15282	1.82453	0.0311909
Spock2	18.6998	1.82186	0.000307768
Samhd1	3737.54	1.82175	9.58281e-49
Ppef1	316.488	1.82156	3.41378e-20
Eif3g	4110.82	1.82097	1.8464e-39
Rnf114	2517.37	1.82078	6.54056e-21
Rab3ip	2085.05	1.82037	3.34595e-44
Plek	6.23796	1.81929	0.0365503
Col10a1	24.8955	1.81216	3.04208e-06
Gm10036	36.6804	1.81203	8.23425e-06
Wdr66	88.1271	1.81143	1.85918e-09
Rps18-ps3	520.125	1.8111	8.12197e-11
Hoxb1	35.6242	1.8107	0.0399071
Trmt10a	1090.23	1.8047	4.42434e-26
Gm10029	43.05	1.80453	0.00105589
Gm12033	19598.8	1.80439	1.2762e-22
Cisd1	1216.64	1.8019	1.46111e-25
Gm15640	32.6141	1.80153	0.000444513
Tas1r2	31.2379	1.80125	1.8337e-06
Abcc1	6563.18	1.7992	6.46826e-48
Hmcn2	50.9119	1.79881	0.00818767
Rab39b	192.572	1.79791	5.64774e-07
Rps27l	3039.05	1.79752	4.30976e-33
Gm13068	8.71313	1.7957	0.0223066
Gm24119	8.33837	1.79556	0.0413384
Prdx5	5188.91	1.79542	1.92015e-37
Ube2t	295.388	1.79446	8.296e-08
Selenoh	777.659	1.79418	8.13518e-21
Trip6	4067.67	1.7934	1.13488e-25
Tent5c	31.8844	1.79291	0.000485513
Slc22a13b-ps	8.8269	1.79289	0.0325789
Yjefn3	129.027	1.79259	6.89379e-10
Babam2	2414.2	1.79141	6.4824e-34
Rnh1	9811.71	1.78999	5.13322e-22
Hist1h2be	35.4358	1.78954	0.00013598
E030030I06Rik	73.1121	1.78952	9.86066e-06
Ip6k3	40.3684	1.78932	0.000958758
Ptpn14	6806.86	1.78776	1.20261e-70
Gm24044	25.6457	1.7877	0.00012238
Raet1e	152.564	1.78742	3.71194e-14
Irf7	51.0882	1.78724	2.81283e-06
Nectin2	3231.19	1.78626	1.21355e-41
Trpt1	309.83	1.78616	6.08009e-24
Rasgef1a	8.73535	1.78404	0.027868
Gm3200	26.124	1.78392	2.75556e-05
Thap4	2190.18	1.78355	4.93898e-29
Gars	14768.9	1.78078	3.67882e-35
Snx15	878.822	1.78073	2.9599e-77
Tbc1d7	554.073	1.78023	1.23928e-32
Wwox	869.252	1.77976	4.9182e-29
9230114K14Rik	104.746	1.77801	4.6358e-10
2410006H16Rik	10631.4	1.77734	1.18358e-10
Ripor3	41.9626	1.77709	0.00168832
Rpl10	12459.8	1.77699	4.53938e-14
Lsm11	725.402	1.77684	4.65185e-23
Hspa4l	3271.54	1.77625	2.27531e-13
Mcrip2	335.853	1.77612	2.86164e-16
NA	56.0079	1.77548	3.97549e-05
Acot9	3567.36	1.77477	2.7632e-30
Kctd7	323.977	1.77451	1.20273e-19
Gm12366	374.608	1.77286	1.1573e-09
Adamts4	1372.94	1.77215	7.99619e-16
Syngr3	13.501	1.77137	0.0437546
Zfp474	8.43615	1.76975	0.0261424
Ptprd	25.4249	1.76943	0.0401623
Nudt15	117.4	1.76885	1.69604e-13
Adamtsl1	75.6229	1.76819	0.00651039
Bax	4107.2	1.76718	1.21935e-29
Srp72	10229	1.76594	2.9905e-35
Gm5786	119.656	1.76562	2.9821e-13
Il7	12.9041	1.76521	0.0220362
Klhl26	2008.49	1.76496	3.19956e-45
Flrt3	33.1467	1.76406	0.00539901
Prkd1	1467.09	1.76402	3.41843e-46
Hdgf	20795.9	1.76297	6.89738e-42
Gm15191	9.5406	1.76224	0.0128305
Gm10602	148.956	1.76166	9.05059e-22
Gm11249	1092.35	1.76088	1.82628e-10
Lmbr1l	980.758	1.76032	1.35159e-17
Dst	14726.7	1.75916	6.8527e-25
Plekha8	1302.29	1.75882	2.45712e-42
Rpusd3	280.617	1.75777	1.82532e-18
Mknk2	5451.66	1.7562	2.13829e-17
Efnb1	347.492	1.7558	2.74001e-20
2019-09-04	46.9701	1.75454	2.9437e-05
Lias	1391.86	1.75438	5.96602e-67
Cfap61	19.5288	1.75425	0.00659328
BC022960	75.2846	1.75372	5.08273e-08
Cavin4	290.981	1.75255	4.3722e-12
Rgl3	384.48	1.7495	4.55728e-28
Tent5b	1620.45	1.74915	9.54717e-25
Rnu1a1	7.85051	1.74914	0.0450533
Eif3i	12035.1	1.74911	3.56437e-26
Gm11478	30.239	1.74864	0.000308696
Atp1a1	13088.3	1.74819	5.93296e-33
Ppp2r5d	4897.84	1.74759	1.85952e-35
Cct5	20882.6	1.74716	4.34928e-60
Gm8349	64.4501	1.7455	8.34688e-13
Mrpl32	969.424	1.74328	5.97405e-48
Epb41l4aos	846.538	1.74253	2.5113e-10
Rpl27-ps1	134.872	1.74144	1.00822e-07
Nxf3	15.3805	1.74118	0.0291824
Nosip	1483.98	1.7387	3.21171e-31
Nme2	20448.7	1.73717	2.12775e-49
Clu	185.671	1.73638	3.38002e-08
Ccdc170	17.3266	1.73632	0.00082208
Gmip	1120.36	1.7358	1.525e-22
Junb	1589.77	1.73563	2.79648e-08
Ddit3	6642.72	1.73512	2.06991e-13
Slc19a2	1917.48	1.73427	6.00735e-32
Atp6v1g2	90.0985	1.73405	1.05593e-12
Cnn2	23457.3	1.73211	3.44905e-49
Cabp4	6.74359	1.73193	0.0271138
Mcu	1703.92	1.73112	2.70881e-56
Bsg	26626.7	1.73107	1.2075e-23
Mrvi1	124.373	1.7309	7.7686e-05
Zmat3	4898.11	1.73009	1.89646e-30
Dusp4	2570.48	1.72885	2.51376e-09
Disp1	2262.13	1.72836	1.46942e-61
Slc39a10	3524.38	1.72757	1.954e-13
Slc2a9	175.161	1.72449	8.42365e-17
Gm4737	8568.32	1.72433	3.91407e-22
Mrps18b	1968.32	1.72385	2.5208e-38
Tsen54	797.312	1.7228	3.50363e-30
Rps2-ps4	80.9541	1.72087	0.000769017
Krt86	11.2594	1.72065	0.00355913
Mybbp1a	15401.1	1.72052	1.15313e-33
Tmc7	16.6533	1.7202	0.00648123
Rpl35a-ps5	15.4156	1.72016	0.00148515
Flt3	12.61	1.71956	0.0065981
A230020J21Rik	18.8725	1.71879	0.00198432
Ufc1	3015.99	1.71787	1.93104e-26
Mnd1	246.532	1.71662	5.77465e-25
Slc12a4	4348.57	1.71594	2.28993e-56
Car5b	116.617	1.71433	5.63706e-13
Aim2	214.759	1.71422	6.12734e-15
Rabggtb	5299.56	1.71377	7.56899e-48
Tnpo2	9752.2	1.71372	6.06098e-35
Gm26619	12811.5	1.71257	2.71233e-12
Retreg1	1973.38	1.71144	2.09712e-21
Phlda1	939.969	1.70944	3.03092e-11
Fam177a	1383.29	1.70938	9.64205e-30
Fau	8902.56	1.70899	7.60014e-16
Pld2	1123.43	1.70886	3.01842e-27
NA	329.905	1.70734	1.34986e-09
Siglece	8.05101	1.7068	0.0137849
Rps3	56649	1.70563	6.04113e-19
Gm6433	39.0436	1.70551	0.000451327
Znrf2	1311.36	1.70499	7.55631e-22
Nudt22	470.217	1.70469	7.85897e-37
Fxr2	4780.18	1.70404	5.28483e-30
Gm5805	361.4	1.704	3.63135e-07
Gm13075	19.6946	1.70393	0.00121998
Chp1	6682.07	1.70284	5.84405e-24
Nuggc	50.0947	1.70258	3.44102e-08
Mrpl17	2145.42	1.70221	1.92894e-46
Nepro	974.788	1.70029	5.83762e-33
Gm26917	957.874	1.69989	2.35096e-31
Crim1	4958.72	1.6993	1.65525e-14
Rpl18-ps2	29.0676	1.69915	5.36772e-05
Fgf18	10.0584	1.69852	0.0497861
Me1	3504.25	1.69843	8.11077e-38
Rpl27	2340.73	1.69814	7.59673e-13
Col5a2	40728.6	1.69764	1.41863e-14
Raet1d	118.664	1.69683	4.34832e-09
Mrpl45	1814.46	1.69669	2.14184e-32
Rps6-ps4	132833	1.69654	1.16548e-19
Zfp579	654.351	1.69633	1.84026e-17
Gm12070	115.878	1.6959	0.000889361
Sgsm1	11.8223	1.6949	0.0198025
Ncam1	1630.79	1.69455	4.27099e-21
Ubl4a	2372.33	1.6944	4.42324e-43
Ifi205	92.8112	1.69427	0.00919431
Tnfaip3	769.744	1.6941	1.23762e-11
Bcl2l1	4294	1.69345	5.49911e-27
Tmem170	255.305	1.69331	2.63989e-24
Cdipt	3223.08	1.693	2.6376e-57
Gm5915	8.23253	1.69266	0.0362785
Pqlc3	1007.22	1.69264	7.68389e-26
Gm3534	28.9513	1.69255	0.000166936
Aurka	1220.68	1.69142	3.28269e-06
Chchd5	838.866	1.69073	1.1218e-16
Gm10382	31.8708	1.68943	0.00848048
Il15	186.935	1.68827	2.63456e-13
Bambi	119.379	1.68769	1.21271e-08
Rack1	120397	1.68724	3.44545e-17
Numbl	3202.63	1.68699	6.22248e-31
Gm10108	146.644	1.68672	7.14734e-06
Gm16470	10.755	1.68451	0.00499984
Drap1	6991.13	1.68447	1.22054e-42
Gm6682	155.907	1.68276	4.09934e-07
Cd24a	2574.11	1.68206	1.63741e-06
Ajuba	2948.79	1.68112	2.80425e-33
Gm2546	31.8994	1.6811	1.15173e-06
Wbp2	5052.65	1.68064	2.39364e-14
Orai1	454.009	1.68064	3.93781e-16
Fblim1	958.475	1.68059	6.60622e-21
Gm10275	71607.8	1.68057	1.07824e-15
Tmbim1	4932.48	1.68032	2.32051e-31
Hint3	384.631	1.67785	5.17131e-14
Ubxn1	7751.98	1.67633	2.51219e-49
3110009E18Rik	177.724	1.67354	1.20998e-08
Utp14a	2739.52	1.67098	4.46057e-40
Gm11953	12.3139	1.67068	0.0129149
Slc22a4	48.5266	1.67067	0.000170168
Cdc20	2852.26	1.66996	1.33339e-07
Rnf31	992.472	1.66845	1.66572e-18
Thbs1	56074	1.66723	4.7132e-07
Oser1	2251.69	1.66622	2.89698e-19
Gm42743	86.7926	1.66569	0.000568762
Ercc6l2	120.823	1.66461	1.14223e-08
Ncmap	11.3482	1.66459	0.0276408
Rhbdf2	448.645	1.66386	2.73013e-21
Ftl1-ps1	92.976	1.66269	0.000272608
Cdk6	743.129	1.66259	4.26037e-26
Ddb1	78266.8	1.66215	1.67768e-45
Rpl13-ps6	16.4444	1.66149	0.0124557
Gm2541	306.225	1.66097	2.34969e-06
Mvp	5662.64	1.66081	5.04475e-30
Kif18b	709.532	1.65955	8.82973e-07
Rps16	14597.3	1.65732	2.22305e-20
Sms-ps	1178.87	1.65719	7.06464e-19
Gm10653	235.115	1.65613	0.000339235
Psat1	15457.8	1.6552	5.55896e-09
Ier5	3710.22	1.65403	3.25423e-28
Pfkm	3671.09	1.65373	4.69578e-31
Gm12286	430.983	1.65358	4.35596e-10
Cdc34	2896.49	1.65196	1.80502e-23
Stxbp3-ps	13.8844	1.65157	0.0217878
Ddit4	1013.74	1.65038	1.08362e-19
Sgcd	202.506	1.64936	5.78104e-06
Gm4968	86.2847	1.64932	1.53244e-07
Wdr93	28.3575	1.64896	1.64451e-05
Dbp	721.647	1.64849	3.31943e-07
Gm11185	17.003	1.64796	0.00615831
Lin37	543.541	1.64761	4.04002e-20
Tmem63b	2442.58	1.6469	9.8927e-53
Supt3	1376.16	1.64611	2.45838e-21
Prorsd1	28.6761	1.64347	0.000524621
Arl14ep	4362.34	1.64315	4.37571e-21
Cd81	15598.9	1.64309	3.99888e-21
Vrk2	912.338	1.64306	5.46657e-46
Clic4	7974.14	1.64243	5.82596e-21
Myl6b	236.337	1.64046	3.26786e-13
Kcna4	440.106	1.63946	1.53845e-11
Uhrf1bp1l	3287.03	1.63931	1.07782e-49
Gm13050	29.9662	1.63721	4.19711e-05
Tubb4b	9221.44	1.6368	8.04838e-10
Plekha7	19.497	1.63637	0.0112821
Trib3	1385.44	1.63591	2.23526e-06
Irak3	70.0482	1.63577	8.03468e-09
Prkag2	1252.87	1.63483	1.67732e-48
Tpk1	262.273	1.63429	4.84776e-21
Mrrf	1845.38	1.63363	2.04376e-33
B3gnt5	34.6745	1.63036	0.0111433
Tap1	754.365	1.63003	1.70127e-16
Ccdc107	815.764	1.62937	1.44469e-37
Gm10243	15969.9	1.62869	9.2416e-21
Sbno2	2509.39	1.62844	1.86021e-28
Hsdl2	1811.39	1.62638	3.40687e-44
Smpd1	2430.28	1.62633	4.84494e-25
Gm13464	317.042	1.62557	9.05798e-11
Tmem209	1826	1.62511	8.40693e-37
Oxsr1	2997.3	1.62459	2.55109e-40
Farp2	1084.05	1.62413	9.02825e-37
Hspg2	28446.7	1.62404	1.28644e-16
Upp1	35.4715	1.62377	0.00754706
Ryr1	20.1311	1.62344	0.00465666
Ntn4	184.271	1.62228	6.32949e-10
Sp6	12.2716	1.62224	0.0323253
Gm12176	45.1795	1.62214	3.47062e-05
Eif3h	21120	1.61631	2.70502e-15
Sik3	2887.66	1.61624	1.16091e-31
Hbs1l	4908.21	1.61618	1.57841e-94
F8a	147.148	1.6153	5.07872e-10
Por	4956.62	1.61518	2.1034e-18
Ubxn6	3031.37	1.6148	2.00351e-29
Rps15	55482.9	1.61429	2.48159e-15
Eif4ebp1	7809.69	1.61423	1.39446e-34
Faim2	94.5207	1.614	2.22936e-08
Gm17383	49.2421	1.61378	0.000238483
Col5a3	679.716	1.61201	1.82069e-07
Gpx4	15070.7	1.61101	1.10323e-21
C9orf72	868.87	1.60948	1.40195e-78
Gm14252	6.16975	1.60925	0.0461698
Fam107b	3625.92	1.60907	7.75652e-21
Cngb1	14.2618	1.60847	0.0492261
Sh2d4a	65.9653	1.60835	1.14088e-12
Kcnj2	21.5382	1.60725	0.0221341
Nrg1	1866.44	1.60711	1.70521e-21
Awat2	33.2016	1.60697	3.20616e-05
Dot1l	2904.51	1.60621	4.12621e-25
Dedd2	306.174	1.60595	4.96787e-16
Zdhhc2	222.392	1.60503	5.204e-07
Naa38	1144.54	1.60476	5.27173e-32
C2cd2l	454.103	1.60457	5.43063e-11
Gm13509	20.746	1.60439	0.0022076
Gm26850	12.5362	1.60371	0.0451702
Ttc16	24.8797	1.60332	0.00109596
Maoa	11869.7	1.60239	7.20283e-19
Parl	1832.88	1.60234	2.1355e-33
1810037I17Rik	1837.47	1.60205	3.50364e-35
Rmc1	1218.19	1.59968	7.63439e-25
Gm26578	320.257	1.59944	3.13501e-23
Kat5	1999.46	1.59878	1.32474e-27
Gm25442	9.79066	1.59864	0.0297174
Tom1l1	742.84	1.59844	8.51888e-29
Gm12416	46.4808	1.59836	0.000447833
Grk2	3292.24	1.5981	1.21253e-44
Rps11	38460.8	1.59804	6.87055e-18
Specc1	3432.28	1.59765	2.09671e-19
Prnp	14550.6	1.59744	1.52864e-22
Copg2	4967.6	1.59637	2.75581e-35
Sbds	2941.88	1.59506	4.0009e-38
Castor1	337.806	1.59505	2.52588e-19
Mgmt	694.136	1.59473	9.46298e-22
Gm26909	21.6103	1.59435	0.000110738
Ptx3	4202.89	1.59415	3.49533e-06
Bloc1s2	1188.42	1.59374	1.42318e-79
Qsox1	10100.2	1.59283	1.36764e-21
Trim16	1755.35	1.59201	6.74988e-21
Lrrc8e	165.339	1.59136	5.54481e-13
Rps6-ps3	125.057	1.59066	4.97884e-08
Rasl11b	155.403	1.58955	9.8153e-08
Gapdh	2734.94	1.58756	0.00151151
Tbx6	29.7974	1.58732	0.000937336
NA	737.341	1.58732	2.63253e-18
Tkt	7929.85	1.5873	6.40482e-29
Ptchd4	348.95	1.5865	0.000651328
Gm13436	72.5382	1.58645	1.40411e-05
Bex3	8754.03	1.58637	4.55181e-42
Aldh18a1	7021.69	1.58522	1.29677e-19
Tubd1	135.319	1.58511	7.22616e-15
Cox5a	4353.77	1.58488	1.45606e-28
Ppp1r3a	78.0668	1.58423	0.0396522
Rpl7a-ps5	17.2004	1.5833	0.000909089
Haus8	750.97	1.58312	1.05305e-11
Cox6a2	24.8909	1.58233	0.00263556
Rpl3	68.9326	1.58155	0.000826796
Adrm1	5007.96	1.58124	9.79616e-24
Spon1	17.9031	1.58026	0.0179956
Sh3bp1	1826.72	1.57989	3.03946e-28
Kat8	866.028	1.57923	1.43983e-25
Cav1	38978.1	1.57879	9.21901e-37
Kif2a	2279.02	1.57794	5.07128e-32
Rpl9	44619	1.57791	4.03746e-20
4932414N04Rik	12.4576	1.57765	0.00908617
Dkk2	170.648	1.57718	0.0360764
Taf10	2599.1	1.57571	6.65832e-23
Inppl1	6885.39	1.5748	1.58608e-56
5430416N02Rik	1000.53	1.57229	1.42292e-39
Ighmbp2	888.997	1.57177	2.59693e-40
Fam118b	1286.98	1.57124	1.84315e-33
NA	1727.99	1.56961	0.00135808
Gm11517	11.3153	1.56814	0.0283908
Rpl9-ps7	28.2271	1.56806	0.000384419
Gm13226	135.786	1.56805	7.61239e-08
Vdac1	9711.99	1.56791	6.96751e-48
Strbp	1590.73	1.56751	1.55637e-23
Fam129b	15591.5	1.56723	1.53965e-21
Gm8355	4111.76	1.5667	4.69374e-06
Rad51d	1139.79	1.5659	1.15292e-27
Acsl1	1302.46	1.5657	0.0131801
Txnl4a	1437.89	1.56547	7.2421e-18
Wdr36	2910.01	1.56447	8.44275e-44
Acot13	2081.69	1.56399	3.21786e-24
Pdcd2l	631.812	1.56269	1.13448e-18
Nob1	1945.87	1.56207	2.8327e-40
Ttll2	60.6508	1.56187	0.0489842
Schip1	526.864	1.56143	4.3397e-22
Pkmyt1	487.068	1.55998	8.66517e-08
Tpmt	384.435	1.55997	4.66533e-32
Gm13864	254.082	1.55937	2.25792e-09
Dstn	11056.4	1.55928	4.22936e-38
Mta3	1941.02	1.55905	4.02206e-39
Dis3	2028.2	1.55812	2.38141e-20
Slc25a30	2177.75	1.55804	2.97157e-16
Mmp16	66.211	1.55788	0.000389496
1110038B12Rik	8194.91	1.55788	3.54133e-16
Ell2	681.475	1.55589	3.3799e-14
Grsf1	4328.91	1.55553	4.24162e-33
Tmem88	67.0204	1.55482	2.83998e-05
Sgtb	669.205	1.55369	4.48366e-26
Bnc1	128.643	1.55368	0.000261824
Gk	712.742	1.55325	2.07579e-10
Cav2	3663.33	1.5524	7.95272e-19
Lrrc57	651.394	1.55114	1.83088e-29
Snta1	63.9187	1.55101	7.62139e-05
Cfl2	7309.76	1.54935	5.80547e-23
Zfp598	2577.34	1.54827	4.3393e-41
Fez2	3426.09	1.54764	2.41005e-19
Txnl1	3876.01	1.54719	1.18727e-48
Slc25a39	8371.76	1.54673	6.4828e-22
Gm12922	36.5244	1.54632	0.000899822
Acvr2b	107.623	1.5463	2.91079e-09
Gm5093	17.4771	1.54612	0.00471272
Gm15489	7.30829	1.54596	0.0286241
Rab11fip5	6386.28	1.54567	8.67642e-19
Trmt1	3494.04	1.54536	1.50858e-25
Rnps1	1965.84	1.54495	2.32707e-21
Gm12915	36.1215	1.54488	6.5422e-06
Prkrip1	783.112	1.5448	5.92305e-24
Gm4335	27.545	1.54463	0.000541761
Fxyd5	177.009	1.54173	8.68685e-05
Gtpbp4	3254.65	1.54134	6.57263e-48
Whamm	496.75	1.54036	2.46601e-14
Gm20517	50.8354	1.5401	1.42642e-07
Mak16	2982.45	1.53993	1.05111e-32
Fancc	434.979	1.53947	9.98913e-20
Eif2b5	4375.14	1.53903	1.36513e-35
Sap25	22.9336	1.53778	0.0339114
Olfr1314	22.5936	1.53485	0.00126661
Prkaa2	23.6089	1.53405	0.0115772
Ints11	1652.19	1.53066	5.34747e-27
Ctif	1560.76	1.52972	2.87838e-37
Slc35g1	93.2118	1.52938	9.78215e-07
Mthfd1l	1964.85	1.52914	4.37505e-10
Wdr91	824.479	1.52882	8.10704e-17
Lzic	586.74	1.5285	1.45581e-19
Tagln	2708.69	1.52692	1.98817e-07
Shmt2	7386.88	1.5268	3.8773e-09
Knstrn	1791.18	1.52661	1.29655e-09
Pik3cd	389.174	1.52631	7.96153e-15
Aimp2	1282.29	1.52388	4.34051e-18
Rpl15	5028.83	1.52332	3.31183e-21
Zc3hc1	1726.95	1.52213	1.977e-36
Pgam5	2236.53	1.52195	1.14013e-38
Rusc1	481.212	1.5213	1.54085e-10
Zfp335	1805.27	1.52102	4.01141e-18
Map4k1	81.714	1.5207	2.22514e-10
Rpl21-ps15	1077.51	1.52035	2.55734e-05
Rpl3-ps1	93867.3	1.51906	1.11581e-15
Rpl13	43964.5	1.51877	1.93567e-13
Creld1	74.5769	1.51837	6.08579e-05
Acyp2	175.948	1.51743	4.09017e-18
Flnb	18993.6	1.51684	1.18584e-26
Ifitm1	15.279	1.51569	0.0408045
Bpnt1	749.389	1.51552	3.09591e-19
Rpl15-ps2	26.4542	1.51501	0.0053794
Pithd1	813.319	1.51351	4.1026e-19
Dlgap5	995.048	1.51252	9.70708e-08
Asnsd1	5010.28	1.51154	6.92336e-28
Rb1	846.903	1.51088	8.21039e-19
Polr2h	1088.85	1.50997	2.63233e-30
Gm2574	455.518	1.5097	1.24993e-18
Klc4	995.625	1.50938	5.41464e-11
0610010K14Rik	1202.24	1.50846	1.15838e-18
Gm3222	53.9995	1.5073	3.05621e-07
Cntnap1	62.9968	1.50698	1.68944e-07
Mrpl38	1679.11	1.50667	6.61721e-31
Lpcat4	1034.7	1.50661	1.47289e-20
BC016548	15.3621	1.50614	0.00527011
Gabpb1	1205.66	1.50597	1.25304e-32
Zfp622	2476.5	1.50578	7.23745e-11
Ppp6c	1863.57	1.50554	2.17089e-43
Slc48a1	9279.75	1.50503	6.53347e-21
Esyt1	2873.96	1.50497	3.5751e-31
Rps14	37307.5	1.50478	5.24206e-10
Abhd11	803.72	1.50442	3.00458e-22
Rbks	25.2999	1.5039	0.00066119
Lats2	3075.23	1.50386	1.47806e-26
Tor4a	194.187	1.5035	1.16349e-09
Grik5	256.858	1.50331	2.17422e-13
Emd	2493.99	1.50317	5.54183e-23
Ppme1	2062.27	1.50287	9.03959e-31
Polr2c	2424.52	1.50127	5.81347e-27
Gm15337	9.80195	1.50112	0.0249118
Sars	17432.9	1.50101	3.65167e-34
Eif2b3	1233.24	1.50057	1.36172e-40
Ttc25	33.3401	1.49879	0.0162304
Sil1	1576.43	1.49745	4.7938e-13
Asl	1505.36	1.49731	3.69823e-17
Tubg1	1655.84	1.49668	1.25456e-11
Phlda3	4700.22	1.49468	7.65512e-11
Isg20	692.621	1.49456	2.79233e-12
Spag4	73.3501	1.494	1.11357e-06
Mettl21e	9.7712	1.49332	0.0252258
Pwp1	2355.65	1.49306	1.13098e-36
Slc3a2	11311.1	1.49236	7.01744e-31
Serbp1	24175.3	1.49105	1.52048e-41
Hebp2	255.395	1.4904	3.02889e-17
Gtf3c1	5130.11	1.48943	3.41944e-26
Htra1	323.733	1.48914	1.78989e-20
Usp39	3405.71	1.4887	1.02587e-19
Gm9083	22.2364	1.48748	0.00290671
Lrp2	44.9614	1.4866	0.00307414
Wnt4	10.6499	1.48606	0.0444568
Sod1	7945.1	1.48585	1.53992e-30
Man1a	1574.81	1.48568	2.43058e-12
Ghitm	11802.3	1.48516	1.29956e-27
Gm17501	28.8555	1.48491	0.0126896
Phgdh	14268.9	1.48444	2.23739e-12
Fuk	922.142	1.4834	1.10007e-30
Gm8318	56.0556	1.48295	1.27235e-05
Vps11	2731.76	1.48257	2.46368e-12
Pkd1l3	40.6579	1.48211	3.19931e-05
Fam83h	457.876	1.4813	9.21848e-29
6430562O15Rik	12.1798	1.47969	0.00577384
Eif2b2	1629.98	1.4784	1.75944e-22
Vwa1	45.313	1.47798	0.000228169
Rpl10a-ps1	49044.2	1.47759	8.66145e-13
Gng3	55.7802	1.47755	0.00179428
Col20a1	635.223	1.47695	8.85716e-08
Dcaf15	1619.34	1.47644	5.26902e-18
Fbxl8	383.151	1.47626	1.0403e-12
Rpl24	25807.9	1.47535	1.8215e-15
Pde5a	58.3391	1.475	6.23146e-07
Brinp1	311.655	1.47496	7.54479e-05
Fzd6	270.123	1.47483	3.24507e-13
Fuca2	3318.4	1.47464	1.17371e-19
Fbxl20	3801.09	1.47437	4.78868e-11
Atxn2l	6670.12	1.47236	6.49872e-37
Arhgef39	102.944	1.47157	0.000134686
Ftl1	156446	1.47155	7.11588e-15
Camk2b	29.4969	1.47073	0.0294707
Gm9013	38.9956	1.47038	0.000596646
Gm13632	65.5249	1.47037	9.9528e-08
Nkiras2	1742.75	1.46973	1.28024e-15
Map1lc3a	2634.2	1.46952	4.01405e-17
Psmd11	5834.12	1.46905	1.19333e-41
Cit	699.307	1.46848	2.71745e-05
Bysl	1467.65	1.46757	7.04174e-17
Plpp2	931.329	1.46702	5.14496e-21
Il17rc	2513.62	1.46669	8.40346e-65
Wincr1	360.43	1.46662	4.33432e-06
Cox18	676.039	1.46634	4.23181e-25
NA	3226.76	1.46613	3.75374e-18
Ppa1	2005.85	1.46601	3.13257e-13
Pgpep1	2247.35	1.46501	4.21499e-25
Cox7a2l	10855	1.46443	4.14606e-12
Pde6g	13.4121	1.4617	0.0182522
Gm10080	25.4548	1.46006	0.000208393
Inca1	136.146	1.45937	2.96575e-08
Mpp6	1620.76	1.45909	1.9237e-10
1810009A15Rik	1592.77	1.45853	3.80751e-28
A530013C23Rik	96.1171	1.45833	5.84273e-07
Qars	5609.25	1.45716	3.87188e-17
Cpxm1	32.083	1.45677	0.000231955
Ctbs	628.373	1.45661	4.88584e-37
Pcbp1	15320.2	1.45646	1.01573e-30
Polr1d	2742.96	1.45535	7.38816e-44
Wwp2	3084.46	1.4549	3.2512e-19
Mecp2	3791.3	1.45405	9.51465e-17
Aldh1a7	739.24	1.45383	0.00547473
S100a3	56.3242	1.45314	0.000181851
Rpl17-ps9	231.501	1.45313	6.78275e-10
Rbms2	13507.5	1.45307	7.35837e-14
Gm4204	1280.22	1.45293	5.77596e-12
Cib2	11.9596	1.4525	0.0109067
Ssh1	2810.46	1.45247	2.85691e-38
Dvl1	2494.32	1.45239	8.14218e-29
Zhx2	795.621	1.45213	2.37895e-12
Nfil3	1259.06	1.45209	1.07208e-12
Gm26767	23.9265	1.4515	0.00141396
Tnfsf9	487.32	1.45069	8.78222e-09
Aoc2	159.816	1.45054	9.37912e-08
Ube2cbp	39.2823	1.45035	0.000141267
Abcg4	19.2543	1.45034	0.00823752
Spindoc	1533.97	1.44913	2.9809e-17
Bscl2	225.836	1.44685	2.87118e-08
Polk	816.699	1.44653	1.18339e-13
Btf3	18129.3	1.44634	5.63972e-23
Ptprv	67.1469	1.44602	0.0460287
Cmtr1	4053.65	1.44513	1.86256e-37
Wdr74	1689.81	1.44467	1.03502e-21
Rps6-ps1	64.5235	1.44367	4.0964e-05
1190005I06Rik	16.8688	1.44177	0.0146549
Rps5	42435.7	1.44159	3.13827e-11
Slc7a5	7418.66	1.44154	1.66382e-05
Usp20	1287.73	1.44014	1.09394e-23
Stip1	10290.2	1.43979	8.91293e-17
Bach2	553.851	1.4395	8.92484e-06
E2f7	788.128	1.43944	3.5339e-05
Limk1	1848.01	1.43862	2.2996e-16
Rps23	23042	1.43844	6.20345e-10
Gm7536	46411.4	1.4378	3.46955e-15
Idh3b	5787.05	1.43571	8.86814e-23
Gpi1	20361.7	1.43566	3.95537e-19
Pam16	808.404	1.43546	8.61804e-30
Cobll1	2804	1.43516	1.67044e-28
Cpt1c	488.929	1.43503	4.24688e-26
Thnsl1	299.735	1.435	1.40815e-19
Eif3l	10508.6	1.43485	3.1183e-26
Fmo3	67.83	1.4347	0.0362951
Eif4b	44123.9	1.43446	7.55793e-18
Plekhh3	1084.08	1.4341	1.49148e-18
Rps10	48037.2	1.43285	3.37329e-13
Rab26	6.78843	1.43206	0.0360979
Rin3	39.4385	1.43147	0.000356031
Impdh1	2647.66	1.43143	6.68199e-35
Sod3	262.731	1.43124	0.0039596
Pnpla6	1143.85	1.43081	1.83463e-40
Tuba4a	1663.61	1.42975	3.68901e-09
Tns2	5211.11	1.42963	1.30703e-25
Ndufb6	1520.58	1.42907	3.45929e-31
Rps25	29032.2	1.42891	2.97274e-15
Wnk4	1179.84	1.42852	5.63706e-13
Tmem106c	1500.54	1.42818	3.9723e-19
Pabpc1	86856.5	1.42793	6.68445e-23
Bhlhe41	899.549	1.42771	9.0621e-09
Zfp473	122.705	1.42689	2.38956e-05
Rbm28	3905.03	1.42613	1.53683e-22
Rpl26	50023.3	1.42591	9.5694e-18
Atp7b	74.217	1.42589	5.38742e-09
Gm11960	82.0533	1.42541	4.26596e-05
Slc30a6	877.15	1.42533	4.51459e-40
Fam228b	22.3499	1.42493	0.000600734
Gm6969	2684.56	1.42446	4.53736e-11
Hgs	3316.3	1.42421	4.4174e-19
Dnm3	207.351	1.42358	1.37202e-05
Prrg4	14.3106	1.42198	0.0275429
Rpl41	80605.6	1.4219	1.57142e-12
Popdc3	16.7202	1.42167	0.0399341
Gamt	997.19	1.42148	1.38092e-16
Amacr	720.34	1.42099	4.55911e-18
Emc3	5381.19	1.42063	2.86702e-26
Serpinb6a	9297.12	1.41964	1.26082e-35
Tbrg1	7943.99	1.41865	7.09304e-23
Ttc32	115.941	1.41737	2.57292e-13
Emc6	1268.95	1.41734	1.18134e-56
Gm11808	30010.5	1.41662	2.86863e-16
Calr3	72.6683	1.41502	3.07956e-09
Rpsa-ps9	649.6	1.41474	8.99363e-07
Gm12454	22.7433	1.41395	0.0242376
Rps15a-ps6	8.09262	1.41349	0.0457064
Platr20	22.754	1.41242	0.00322806
Adra1b	80.7311	1.41221	0.000194814
Dcaf4	1122.33	1.41186	5.93266e-17
Mta1	6436.5	1.41145	4.23636e-28
Cpeb2	370.5	1.41091	4.28883e-13
Cdc42ep5	621.059	1.41068	7.43349e-12
Gm8172	44.9062	1.41061	0.000240628
Tpx2	3448.02	1.41022	2.58107e-06
Adss	4524.18	1.40992	6.33337e-34
Il18r1	15.3082	1.40907	0.0274449
NA	28.3464	1.40887	0.000373596
Rpp30	619.708	1.40878	1.91518e-18
Uroc1	10.6707	1.40855	0.0389576
Ndufb4	577.867	1.40838	4.93649e-13
Rassf1	1982.54	1.40836	4.12826e-25
Gm5847	8.50274	1.40791	0.0405576
Tll1	41.9695	1.40776	0.0117047
Reep4	971.131	1.40724	2.88215e-12
Trmo	211.405	1.40714	6.60245e-11
Mmaa	989.49	1.40644	7.32375e-12
Ifi35	678.757	1.40616	1.22755e-16
Arl2	2679.75	1.40594	1.57341e-14
Rabl3	368.05	1.40557	5.69418e-15
Gm5526	15.9332	1.40529	0.00731935
Zfand2b	745.081	1.40501	2.68944e-32
Mcts2	402.548	1.4038	2.66644e-22
Rpp40	775.796	1.40274	2.79335e-13
E2f6	108.696	1.40216	1.03605e-08
Zfp511	616.624	1.40201	3.61669e-20
Rpl17	47230	1.40196	5.87358e-12
Gm4691	61.0778	1.40162	0.000513103
Sympk	8088.67	1.40144	8.31189e-21
Gm20636	8.32814	1.4007	0.0371671
Nmt1	7745.59	1.40053	2.5591e-25
Zfp593	763.25	1.40009	8.12072e-17
Necap1	2428.8	1.39926	1.39085e-32
Mapre3	1426.06	1.3987	3.43712e-13
Slc8a3	48.2896	1.39802	0.00105002
Slc29a2	224.335	1.39785	2.78225e-14
Ciao2b	1227.32	1.39669	5.2147e-21
Gabarapl2	2747.47	1.39627	6.47501e-15
Tuba1a	32146.5	1.39606	3.22028e-18
Usp22	5532.79	1.39568	6.42579e-14
Paxx	701.554	1.39557	1.86466e-13
Aip	2860.22	1.39496	2.88116e-22
Hras	1694.37	1.39288	3.31209e-15
2310039H08Rik	526.435	1.39283	3.82318e-21
Rpl28	2509.81	1.39209	5.23955e-07
Pif1	283.187	1.39197	0.000391145
Snrnp200	11710.4	1.39192	6.42815e-29
Rpl7a	25955.2	1.39185	3.74039e-13
Pdzd11	1920.32	1.39181	3.42025e-24
Tcirg1	2505.67	1.3911	3.3689e-17
Rplp0	148996	1.39057	4.47395e-16
Rarg	5414.78	1.39056	1.02662e-22
Ap2a1	5510.98	1.38957	1.84125e-26
Aup1	6846.04	1.3893	6.44488e-32
Adk	3190.01	1.38726	1.06684e-29
Sap30	554.942	1.38678	8.1308e-11
Ogfod1	1856.05	1.38574	5.76488e-27
Eif3k	5580.64	1.38509	5.51562e-14
Gm8730	13578.6	1.38492	2.8981e-12
Zpr1	2032.14	1.38455	5.26957e-21
Pes1	5474.44	1.38441	3.89292e-32
C1qbp	6609.16	1.38437	1.24096e-29
Hist3h2a	838.648	1.38401	5.9687e-11
Ccnk	2008.51	1.38327	2.78194e-12
Mars	4381.01	1.38281	1.47131e-16
Tpst2	2312.6	1.38233	6.10943e-19
Snap47	3433.56	1.38213	1.7486e-24
Rps2-ps5	10.8547	1.38186	0.0125077
Pih1d1	1075.57	1.3801	1.97578e-14
Hoxc4	166.514	1.38001	1.07344e-15
Vopp1	3424.57	1.3794	9.95744e-21
Ppp1r35	376.755	1.37855	1.12694e-10
Aldoa	31312.4	1.37839	3.47028e-14
Apbb1	1088.66	1.37818	3.10185e-25
Immp2l	226.884	1.37788	6.09247e-12
Notch3	14.4193	1.37739	0.0351482
Gm14438	233.544	1.37721	0.000200651
Cs	17852.7	1.37698	2.13397e-22
Gm11627	21.5912	1.37688	0.00266479
Map3k13	64.7495	1.37681	1.38561e-07
Pla2g12a	876.474	1.37618	5.67422e-16
Gjc3	18.46	1.3758	0.00460546
Agpat4	1161.53	1.37501	2.00113e-17
Rpl38	13527.7	1.37307	7.34271e-14
Plekhf2	391.596	1.3729	1.39214e-17
Lgmn	8054.73	1.37248	2.95098e-12
Gm7488	1833.11	1.37226	4.70994e-27
Yipf3	3447.55	1.37154	5.65923e-11
Naa10	1512.75	1.37078	1.38439e-22
Yif1b	1695.9	1.37053	1.52619e-19
Ak1	2929.21	1.36955	3.25344e-23
Mettl22	320.13	1.36952	1.77008e-18
Eif2d	2660.7	1.36947	2.06487e-18
Lsm12	2001.62	1.36897	2.79444e-50
Kifc1	820.52	1.36799	2.90741e-06
Lrrc28	607.672	1.36675	1.7684e-30
Map1b	6864.42	1.36668	1.09894e-17
Brf2	644.311	1.36633	4.13043e-17
Gm10247	32.7554	1.36616	0.00148695
Mrps31	966.283	1.3651	1.5048e-15
Mdh2	12364.9	1.36454	4.32324e-22
Dusp11	7910.27	1.3642	4.04182e-19
Zfp703	916.217	1.36417	2.26339e-10
Basp1	5262.23	1.36338	4.56157e-24
Hsd3b7	1224.25	1.36232	2.42029e-13
Rpl7a-ps11	16425.8	1.36197	2.55615e-12
Fggy	872.059	1.36171	1.92205e-17
Rab4a	910.112	1.36067	1.6185e-25
Mrps16	1130.11	1.3606	3.88805e-25
Utp23	570.547	1.35963	6.76812e-48
Eef1d	9782.43	1.35791	1.49365e-17
Gm9396	66.4315	1.35677	0.000316435
Gnb5	631.123	1.35557	6.30403e-19
Snx7	2260.56	1.35481	5.65858e-12
Psmb7	5329.24	1.35463	2.03665e-34
Serp2	10.3655	1.35419	0.0423854
Rplp1	72292.2	1.35238	3.13779e-12
Ptrh1	1785.44	1.35176	4.23338e-16
Mtg1	484.346	1.35149	1.19815e-12
Idh3g	3552.81	1.3512	7.34145e-51
Tns4	36.473	1.3512	0.0202953
Cacnb3	4366.29	1.35119	6.0434e-11
2810025M15Rik	454.551	1.35069	7.20736e-13
Spryd7	748.305	1.35027	5.39284e-35
Naa25	2845.12	1.35002	5.78856e-31
Ercc3	2067.81	1.34905	1.54783e-27
Rps6ka5	321.241	1.34806	2.84599e-12
Pcdh1	2459.62	1.34764	2.26813e-19
Inpp5k	2174.2	1.34748	4.96271e-17
Actr10	3839.07	1.34748	5.05401e-40
Trim11	1637.38	1.34727	1.33245e-26
Psma7	5994.92	1.34714	6.47856e-23
Gm10327	77.9235	1.34705	3.80201e-05
Gtpbp2	2282.05	1.34618	1.04987e-23
Rpl15-ps3	37991.8	1.3456	5.18928e-11
Slc37a2	33.4439	1.34536	0.000823326
2310022B05Rik	12775.9	1.34529	7.61548e-11
Ufsp1	105.013	1.34516	6.88522e-09
Spry1	847.992	1.34508	3.51153e-07
Nsmce1	1028.99	1.34451	1.65103e-21
Rfc4	532.278	1.34396	1.92007e-12
Gm15793	214.717	1.34381	1.4975e-05
Rpl35	28922.3	1.34348	2.34203e-16
Ccni	10061	1.34312	1.43883e-16
Slc20a1	2917.81	1.34269	2.30562e-14
Gm14150	809.443	1.34268	1.56383e-14
4632427E13Rik	66.3201	1.34207	0.00629253
Susd6	4237.93	1.34111	2.391e-11
Gm13292	28.6976	1.3408	0.0187954
Rpl19	61202.7	1.34043	5.68713e-12
Bcorl1	1056.98	1.34015	8.9817e-13
Nmt2	3256.68	1.34004	4.3466e-18
Col18a1	133.754	1.33922	0.00228677
Baz2a	4071.96	1.33887	6.6679e-72
Timmdc1	721.405	1.33806	1.22393e-22
Stap2	79.9004	1.33632	1.20825e-06
Coq10b	1114.82	1.3363	2.08623e-13
Tm4sf1	4004.71	1.33581	2.76232e-13
Pwwp2b	1031.02	1.33544	1.26146e-11
Mea1	2622.42	1.33494	4.78464e-24
Gm20900	83.4022	1.33471	0.000259355
NA	20.7135	1.33466	0.0141027
Ang2	58.0556	1.33465	0.000693789
Rrp12	1698.78	1.33409	1.3531e-08
Snord37	16.5197	1.33399	0.0231505
Eed	1239.55	1.33386	4.9894e-25
Git2	3927.94	1.33303	1.87918e-15
Pex16	676.27	1.33296	1.59609e-16
Pitpnm1	3326.04	1.3329	1.34495e-37
Gm10073	9.99838	1.33269	0.0373945
Npepps	9806.65	1.33208	3.50556e-32
Rpl4	100332	1.33131	2.81078e-14
Dnajc4	650.837	1.33096	4.01505e-11
Ddx39	3293.01	1.3307	1.70268e-09
Thumpd3	1520.85	1.33042	3.59516e-29
Nploc4	4231.42	1.33008	1.1671e-16
Lap3	4765.23	1.3289	2.58205e-31
Mrps30	1413.12	1.32829	1.79821e-28
Ap2m1	16486.6	1.32773	2.86095e-28
Irs2	2222.68	1.32763	3.67213e-20
Dtwd1	574.376	1.32751	9.8178e-27
Phb2	9596.17	1.32678	1.05681e-22
Ptgs2os	66.7624	1.32651	0.000831357
Gm17709	122.554	1.32539	6.1214e-12
Gm7808	50.8315	1.32536	0.000160793
Gm9843	23508.3	1.32535	8.09579e-11
NA	4706.05	1.3253	2.16767e-21
Fbxo47	20.0265	1.32519	0.0114416
Psmb6	4995.4	1.3242	5.46313e-28
Agpat3	4907.69	1.32388	5.01163e-32
Ndufb4c	1556.46	1.32382	2.35296e-20
Rpl6	74724	1.32345	1.32713e-13
Prc1	2935.88	1.32344	2.90829e-05
Nadk	3967.33	1.3221	7.59872e-23
Pabpc4	13810.9	1.32206	9.10547e-23
Psmd12	4257.97	1.32152	4.17008e-32
Ssr4	4717.05	1.32124	1.62893e-12
[truncated: 8,566 more rows]

## Sheet: DEgenes_NIH3T3_YAP-TFE3_vs_EV
Gene	baseMean	log2 Fold Change	padj
Crct1	218.199	11.7709	3.92822e-19
Gm43154	35.3263	10.3647	1.04068e-13
Lypd5	36.5374	10.2789	2.22404e-12
Gal3st2	33.3969	10.0926	6.35177e-12
Ptprt	174.328	9.71126	8.78735e-18
Fras1	50.5421	9.68217	4.26896e-11
Rbpms2	29.2354	9.162	2.6373e-12
Ankrd29	28.1866	9.1373	0.00220363
Prr32	25.911	8.97151	2.53343e-09
Dthd1	17.0548	8.95654	1.5535e-08
Scel	35.5646	8.85478	2.02931e-08
Lyz2	828.236	8.60499	1.02485e-91
3425401B19Rik	10.9322	8.55674	4.23839e-08
AU021092	16.8814	8.27854	1.26363e-08
Abcc2	27.6158	8.19767	3.28599e-14
Mgam	514.757	8.00256	6.66945e-69
Hephl1	25.6022	7.94246	8.10609e-08
Gm6083	6.94732	7.78689	1.1442e-06
Sntg1	26.6545	7.76761	3.62034e-08
Als2cl	101.828	7.76057	1.8382e-19
Vill	20.0197	7.743	1.70199e-07
Cfap52	5.90096	7.6975	8.63497e-06
Anxa8	232.838	7.6295	3.96373e-08
Atp9a	5.32848	7.52473	0.000261923
Gm6088	11.0474	7.27491	4.70922e-06
Cyp4b1	7.70014	7.257	8.06e-05
Cyp4f14	11.0506	7.24456	1.40688e-06
Tmem150b	157.485	7.11285	0.00116673
Ttll2	60.6508	7.05665	7.55859e-26
Klk1b27	12.0421	7.00887	2.83946e-05
Serpinb6c	18.6077	6.99387	1.17191e-09
Sh3tc1	213.073	6.9895	1.44119e-19
Hist1h4n	13.899	6.82978	1.2458e-05
Slc27a6	6.664	6.81289	8.00383e-05
Lctl	9.52412	6.77206	1.89415e-05
Gpr174	13.3352	6.76606	1.91477e-07
Slc2a12	153.088	6.70672	0.0396856
Mypn	6.08665	6.69841	0.00161318
Rapgef5	8.0565	6.69243	7.24643e-05
Ecscr	21.5515	6.66832	9.41191e-06
Ppp1r3a	78.0668	6.60599	1.74484e-22
Slc6a12	232.627	6.55662	4.0067e-06
Mef2b	78.08	6.55432	0.000925556
Lamb3	47.9384	6.38344	1.70997e-05
Col4a4	11.5651	6.38273	6.23931e-05
Gm15127	7.21099	6.25766	9.38556e-05
Gbp8	10.3215	6.21411	2.33245e-05
Vnn1	94.9677	6.11493	2.11068e-11
Cpne4	29.4482	6.07281	1.67864e-08
Tph1	18.1044	6.02961	2.95777e-10
Serpinb1a	435.17	6.01083	5.16182e-41
Mup5	8.55503	6.00889	0.000579928
Cyp24a1	5.8173	5.96666	0.00106297
Ptprn2	18.064	5.90527	4.38539e-07
Havcr2	173.016	5.89211	1.45919e-26
Slco2b1	11.75	5.88121	0.000557922
Spo11	29.7567	5.8669	0.000159095
Gm9428	14.619	5.81487	0.000198256
Insc	11.9876	5.70546	0.000242775
Prg4	107.048	5.6769	2.45653e-27
Lhx4	18.423	5.64705	3.95049e-07
Elmo1	276.945	5.61616	1.4346e-17
Il31ra	119.783	5.59667	0.000179083
Gm16531	8.9146	5.59094	0.000224204
Eif2c5	9.61856	5.58566	3.30448e-05
NA	10.5488	5.55132	1.89437e-07
Rufy4	5.67829	5.53754	9.84845e-05
Gm7609	148.6	5.50053	5.60867e-37
Limch1	706.477	5.47393	3.69541e-33
Serpind1	71.4025	5.46685	1.76868e-28
Plekha6	15.6018	5.46528	2.0918e-09
Gm15854	18.2366	5.46522	6.45583e-05
Arhgap9	58.2115	5.38494	6.13242e-09
Itln1	5.00508	5.36337	0.00917961
Csprs	36.2346	5.32367	3.32502e-12
Unc93a	52.6368	5.32327	8.01436e-18
Lgr6	16.1482	5.31434	3.16017e-06
Serping1	32.7794	5.30837	0.000389181
Adam22	234.575	5.29054	6.00683e-11
Chst1	44.5196	5.22647	5.73765e-10
Hbb-bh1	14.9421	5.07161	0.000421887
Ranbp3l	21.2844	5.06629	6.14757e-05
Ikzf4	76.1794	5.04529	2.10546e-07
Ifnlr1	8.94873	5.03392	1.51708e-05
Myom2	1179.53	5.02103	2.16318e-39
Ankk1	13.3364	5.01074	0.00246897
Mgll	24.8496	4.98506	1.79459e-12
Cdh5	11.0026	4.98003	0.00292418
Gm25043	5.79462	4.9666	0.00958959
2610028E06Rik	10.9757	4.96132	0.00144975
A730049H05Rik	20.8064	4.91218	1.55569e-05
Ccl6	20.1502	4.90062	6.39468e-08
Gm15080	6.20334	4.89643	0.0162448
Enkur	17.5217	4.87345	2.46572e-07
Wdr72	6.57381	4.86459	8.40116e-05
Sorl1	6.29132	4.84514	0.00814072
Serpinb1c	17.2023	4.83924	0.00591941
Hist1h2bg	15.8432	4.81077	0.000942239
Psca	64.9212	4.80805	0.00277302
Upk1b	1749.01	4.78389	0.00473937
Dnaic1	8.46166	4.7737	0.0198387
Dnah7a	5.72966	4.76031	0.00267111
Muc15	5.02288	4.75059	0.000389181
NA	26.0631	4.74747	0.00473838
Slc2a3	86.4905	4.71791	1.75645e-11
Rpl3l	10.455	4.71158	2.37899e-08
Fam186a	5.7807	4.68666	0.00544542
Crmp1	10.1756	4.65895	1.20449e-07
Fcna	17.1669	4.6287	0.00159933
Slc30a2	5.64036	4.62568	0.00645884
Klra1	6.79692	4.60902	0.00705607
Ptprj	72.0627	4.57623	1.0863e-21
Nrcam	42.6001	4.54191	4.85565e-24
Calcb	38.5236	4.49135	0.000879705
Pdzd2	406.351	4.44716	4.33783e-11
Tfec	10.9954	4.43581	2.21121e-06
Gm5286	7.53189	4.42878	0.0124157
Serpinb9b	3482.51	4.42524	1.66643e-30
Wt1	33.018	4.4109	2.09849e-11
Unc93a2	67.4971	4.40315	2.34204e-23
Des	60.7591	4.38988	8.13453e-11
Gm10230	10.1898	4.37208	0.000394136
Lrrc31	14.7314	4.35698	4.27331e-06
Gm26749	17.4855	4.32314	0.0120431
Gm10256	43.0094	4.31624	1.68274e-09
Cacnb4	40.6066	4.28767	4.9351e-18
Gm53	5.85482	4.26348	0.0268555
Rtn4r	11.4556	4.22759	6.25537e-06
Otoa	5.7293	4.2156	0.0263392
Fndc1	5.82028	4.20893	0.0412434
Klhl30	170.201	4.14389	2.99049e-19
Cngb1	14.2618	4.13896	5.01801e-08
Gm17067	9.65781	4.12235	1.39281e-05
Trpc5os	6.19007	4.12235	0.000651746
Gm13713	5.07248	4.11559	0.00916489
Loxl2	5.43925	4.08995	0.025506
Tfeb	959.762	4.07562	1.96579e-97
Gm26740	5.6017	4.068	0.00325038
Card10	5.87499	4.06537	0.0296069
Sgce	5.71942	4.03718	0.0286542
Gm13415	175.334	3.98473	5.26677e-09
Parm1	50.6274	3.98116	0.0179724
Speer4cos	8.08248	3.9785	2.22812e-06
Ifit1bl1	78.35	3.96583	3.03997e-24
Ccdc3	14.8637	3.92644	7.7687e-07
Tmem71	6.05739	3.9228	0.0139201
Klra5	12.8328	3.92079	0.000158209
Gm2619	5.8171	3.90622	0.00153261
Birc7	495.598	3.90504	5.36128e-12
Col6a4	50.0417	3.90021	1.60224e-16
Hpgds	7.14621	3.88077	0.000992095
Slc2a5	32.5193	3.87828	0.000190822
Klra4	79.2878	3.87574	3.82171e-08
P2ry6	8.54463	3.85097	0.000344361
Eps8l1	19.9726	3.83041	2.78538e-08
Arxes1	501.997	3.81137	7.40939e-28
Ggt5	37.7648	3.78352	0.000377272
Fmo3	67.83	3.78125	8.63117e-09
Snta1	63.9187	3.77876	9.45544e-25
Rnf128	22.0282	3.76385	1.62555e-08
Prss12	16.0826	3.74901	4.68552e-08
Slc4a10	26.5177	3.74133	0.000626925
Tmem255a	15.7638	3.73731	1.17843e-07
Gpr35	13.2528	3.71789	1.97555e-09
Fmo2	37.1448	3.7006	1.67587e-06
Tgtp1	20.6147	3.69118	6.80918e-05
Gm12153	16.7324	3.68873	0.0362479
Gm7592	64.2928	3.68391	3.12538e-15
Hist1h2ac	24.7419	3.68024	2.15567e-09
Rbmy	70.4737	3.65168	7.13895e-08
Olr1	36.0086	3.64272	6.37582e-10
Gngt2	39.7396	3.63015	9.83085e-22
Selp	38.6398	3.61164	0.000118097
Dusp27	32.8036	3.61071	1.79586e-06
Kdr	75.9215	3.59998	1.92113e-06
Lama5	488.289	3.58147	2.34655e-09
Siglecg	4363.02	3.52481	1.11823e-45
Bmp6	5.90151	3.51926	0.00215051
Mettl7b	5.57502	3.50484	0.0277223
Upk3b	18.3839	3.47581	0.0195917
Ms4a4d	289.801	3.47509	6.12313e-15
Adgrd1	8.97435	3.46465	0.0081699
Nxf7	10.4051	3.461	0.016862
Lims2	179.016	3.45439	1.60224e-16
Mamld1	9.31357	3.44699	0.0063527
Slc9a9	20.8768	3.41715	7.28566e-07
Sybu	5.6768	3.37133	0.00353522
Gch1	62.9056	3.36192	3.25951e-18
Jph2	553.318	3.34886	2.76601e-11
Nlrp10	17.466	3.34014	4.1847e-05
D630023F18Rik	6.98901	3.32264	0.00207468
Gsta3	16.3646	3.30499	4.28324e-05
Ccdc180	8.66808	3.27664	0.00603348
Itga7	815.144	3.27535	2.39018e-27
Klra17	8.1159	3.27298	0.00458212
Nlrc5	42.3917	3.25909	3.10794e-14
Il6	22.4655	3.25394	2.06205e-05
Phactr2	110.901	3.22054	1.60224e-16
Syk	89.2727	3.21449	2.44979e-05
Fn3k	24.3983	3.20253	3.1098e-05
Crb2	8.06936	3.18644	0.00110007
Clcnkb	11.326	3.18641	0.0278991
Folr1	25.65	3.17881	3.16633e-05
Gm15433	6.51795	3.16144	0.0160467
Eml2	184.966	3.16053	8.01927e-22
P2ry10b	6.20737	3.14888	0.0202949
Nxf3	15.3805	3.14495	0.000132105
Cstl1	15.0012	3.14276	4.29235e-06
Upk3bl	49.5526	3.13617	0.00121148
Rhpn2	103.224	3.12843	9.56377e-18
Trpv4	13.027	3.12711	6.50091e-06
C1qtnf2	17.2784	3.11578	3.47278e-08
Lrrc24	8.09439	3.11562	0.0266055
Slc6a4	6.59237	3.11289	0.011487
Kctd4	12.5247	3.08527	0.00647577
Cavin4	290.981	3.08509	1.5301e-34
Enho	74.8155	3.07681	7.25322e-24
Tmeff2	105.296	3.04507	3.32785e-08
Obscn	23.8335	3.0408	0.000341972
Tspan15	23.8425	3.0207	9.83223e-05
Hist1h4i	68.6987	3.01221	1.64748e-07
Usp17le	14.6759	2.99049	0.000524999
Gm12138	2019.19	2.98219	1.41731e-21
Sp110	64.3258	2.97739	1.59913e-11
Gfpt2	60.1366	2.97271	3.43186e-17
Ifitm10	12.423	2.95763	0.0217509
Cyp3a13	57.5751	2.95438	0.0022063
Mfsd6	21.5132	2.94015	0.000131917
Cd74	18.4667	2.92435	0.00103842
Susd2	15.1337	2.92114	0.016862
Ptprv	67.1469	2.92062	0.000101429
Hes1	186.857	2.91675	1.36053e-07
C1qtnf5	193.524	2.9145	6.6017e-21
Popdc3	16.7202	2.90317	1.93884e-05
Col14a1	21.1701	2.89641	2.36767e-06
Sod3	262.731	2.886	1.25135e-08
Tmem184a	18.1597	2.885	0.00617949
Akr1b3	27184.1	2.87542	1.86838e-18
Mamdc2	140.42	2.87408	1.3782e-18
Cxcl1	119.975	2.85874	8.94081e-11
Hecw2	21.5744	2.84952	0.0108302
Ppfibp2	6.68357	2.84659	0.037432
Aloxe3	163.782	2.83308	2.28274e-16
Icam1	7.77692	2.833	0.00489469
Tceal5	16.3223	2.82557	0.00362601
Rasl10b	32.8639	2.81889	3.05481e-06
Tnfsf15	5.53261	2.81148	0.0262997
Sh3bgrl2	10.5907	2.80711	0.00148
Hist1h4h	20.5801	2.79815	0.00328803
Ptchd1	55.7226	2.78057	2.33072e-06
Tinagl1	7597.99	2.77973	1.50338e-30
Tspan32	38.523	2.7654	5.86388e-07
Prss27	17.7206	2.76505	0.00325392
Tspan12	74.6818	2.75994	4.26896e-11
Has1	15.9996	2.75155	0.00853384
Adamtsl1	75.6229	2.7509	7.38837e-05
B3gnt5	34.6745	2.75021	3.30088e-05
Ripk3	33.3137	2.73687	5.93992e-06
C3ar1	28.4568	2.73135	0.000318416
Gm10642	6.90692	2.73085	0.0434608
Heph	11.4374	2.71017	0.00865156
Nes	211.71	2.70838	4.79695e-06
Slc6a15	33.4923	2.70788	4.0067e-06
Gm16998	21.0663	2.70757	2.88435e-06
Hsd11b1	26.9144	2.70523	0.0050283
Apob	19.0315	2.70357	0.013118
Eln	24.7987	2.68862	8.98542e-06
Fyb2	205.462	2.66676	7.29821e-06
Anpep	300.051	2.66485	1.54073e-10
Acsbg1	82.3921	2.66227	7.1698e-13
Ip6k3	40.3684	2.65383	1.77713e-06
Tns4	36.473	2.6475	9.35631e-06
Catsperd	26.5426	2.63452	4.0067e-06
Dpep2	58.1446	2.63377	1.11093e-12
Htr1b	5.21266	2.62999	0.01371
Sp100	229.871	2.6263	5.58085e-15
Prrt4	6.2351	2.62107	0.0161706
Plekha2	266.083	2.61602	6.48593e-16
Tg	42.0632	2.60798	0.00262035
Cd28	13.1809	2.59982	0.000817551
Gm12059	5.20445	2.59891	0.0462498
Gm3376	148.22	2.59406	4.10687e-15
Pmaip1	85.1552	2.59031	1.24571e-08
Clcnka	6.20998	2.58991	0.0141291
Serpinb6b	303.433	2.58771	2.27942e-13
Ankrd1	4164.1	2.58671	2.69899e-14
Ppef1	316.488	2.58669	3.6776e-39
Arxes2	825.75	2.57746	7.55859e-26
Ifi205	92.8112	2.57716	0.000259778
NA	7.96478	2.57147	0.00987502
As3mt	32.983	2.56297	2.20599e-06
Hist1h2bl	33.1839	2.55914	0.000586303
Dusp9	278.676	2.55646	7.55288e-17
Adra1d	14.405	2.54482	0.0287985
Hrc	7.30196	2.53825	0.0105356
Gm5570	6.54343	2.5364	0.0331596
Sema3c	667.71	2.53463	1.75933e-05
Btn1a1	43.1525	2.51683	0.00266543
Nipal3	40.6686	2.51171	4.0067e-06
Aff2	6.18238	2.51098	0.022671
Abcc3	10.3585	2.50976	0.011057
Gm6736	924.298	2.49743	1.56408e-11
Gpr179	12.9174	2.48534	0.0137655
Prkg1	134.489	2.48073	3.40778e-13
Inmt	199.452	2.47002	8.12837e-08
Hist1h2bc	898.562	2.4662	5.06355e-08
Pltp	1305.02	2.46581	5.99242e-21
Mogat2	37.4973	2.45286	0.010449
Camk2a	97.0639	2.45195	4.68654e-09
Syt17	46.8465	2.44898	3.94448e-06
Crybg2	69.9443	2.44367	4.16783e-10
Itga3	4169.26	2.42933	2.99049e-19
Usp17la	30.3176	2.42083	3.59522e-07
Erc2	648.41	2.42074	1.63458e-44
Cth	393.519	2.41752	0.00147534
Dkk2	170.648	2.41454	0.00413927
Zfp600	19.8695	2.41417	0.0284697
Chn2	8.32244	2.40201	0.0393533
Abca8a	34.1344	2.40118	0.0133015
Mreg	281.105	2.39747	2.25539e-09
Lman1l	19.177	2.39394	0.00968052
Grk5	918.525	2.39079	2.35102e-21
Alx4	5.88386	2.38919	0.0301835
Gm12840	2928.57	2.3791	3.30448e-05
Abcb11	9.53087	2.36721	0.000812038
Cobl	32.6394	2.36428	0.0353853
Ica1l	23.4277	2.34423	0.000731242
Sorbs2	490.771	2.34249	7.925e-09
Map3k9	11.5342	2.34133	0.0276615
Gipc2	16.0911	2.33856	0.00044972
Adgrg6	18.6663	2.33667	0.00215051
Plscr2	362.9	2.33559	1.41651e-10
Lamc3	81.7366	2.32251	0.000297053
Gm20400	779.139	2.30761	2.08395e-08
Gm11884	8.16574	2.30688	0.0155811
Gria3	1179.23	2.30322	2.93936e-24
Oit3	92.9721	2.29193	4.59628e-05
Golga7b	16.5421	2.28229	0.00063727
Cst6	60.2186	2.2669	3.09507e-06
Slc45a3	239.23	2.2619	2.99049e-19
Adra1b	80.7311	2.25664	2.31633e-09
Fry	21.3299	2.25102	0.000511346
Tgm2	2829.88	2.24942	1.10798e-33
C130026I21Rik	69.2435	2.2361	8.38795e-08
Il3ra	21.8702	2.22787	0.00120537
Cgref1	204.551	2.22748	3.80467e-18
Nhsl2	58.4472	2.22412	0.0120726
Rex2	58.7624	2.21951	6.12391e-05
Mucl3	111.714	2.20169	3.28546e-13
Gm11496	7.0416	2.19538	0.0420105
Acta2	22267.6	2.19427	2.93936e-24
Cgnl1	1941.4	2.18576	1.1251e-08
Ephx1	9309.26	2.17942	1.68577e-25
Fgf18	10.0584	2.17557	0.0287321
Mmp28	209.928	2.17108	2.48622e-11
Tent5c	31.8844	2.16755	8.06e-05
Pkp2	365.327	2.16383	4.87233e-14
Paqr7	35.8722	2.1552	0.000128715
Hist1h2bq	18.5108	2.15117	0.0266055
Plxna4	92.7583	2.13344	5.51352e-06
Gm4841	16.5159	2.11519	0.00288427
Ereg	462.348	2.10971	1.70392e-07
Cd93	188.258	2.10136	9.60668e-07
Defb41	36.0806	2.09995	1.35133e-09
Matn4	26.3751	2.09501	2.18539e-06
Lmcd1	190.966	2.08117	1.50208e-05
Bst2	1204.43	2.07918	9.79518e-15
Fst	208.705	2.07677	2.00898e-05
Synpo2l	127.413	2.07618	0.000330853
Herc3	407.835	2.06056	4.53838e-23
Fgfbp3	84.8235	2.0555	2.1349e-15
Cyp3a41a	110.788	2.05545	0.00269263
Olfm1	251.978	2.04908	4.90156e-07
Fbxl7	12.4387	2.04437	0.00196547
Gm38393	571.023	2.0377	2.68383e-10
Ptgs2	3952.83	2.03469	8.72659e-05
Mcam	18.6258	2.03403	0.015247
Sema6b	29.711	2.03161	0.000507026
Gm12505	700.528	2.02754	1.97748e-08
Sorbs1	833.086	2.02557	4.09531e-28
Dennd5b	74.3048	2.01909	2.54793e-05
Plac8	10.1334	2.01769	0.0363112
Hspb7	111.585	2.01438	0.000275865
Acvrl1	34.106	2.00873	0.00224662
Slc22a13b-ps	8.8269	2.00603	0.0437497
Veph1	84.6208	2.00547	0.000459231
Tmem37	109.536	2.00182	2.39149e-10
Aim2	214.759	1.99901	5.52073e-19
Mmp3	85.4281	1.99226	0.000574407
Prrg4	14.3106	1.99056	0.00521182
AA467197	26.5667	1.98997	1.87857e-05
1700020L24Rik	39.0935	1.98474	1.39377e-06
Pla1a	89.475	1.9788	0.000102143
Gm10825	19.2366	1.97254	0.000525312
P2rx3	1054.95	1.9708	0.000546442
Csrnp1	607.384	1.97077	2.82056e-08
Ifit1bl2	54.3037	1.96533	5.33638e-08
Gbp11	15.6837	1.95745	0.00749662
Rap1gap2	970.539	1.95676	1.03927e-12
Dgat2	90.8686	1.95412	5.97671e-10
Hist1h1d	29.1634	1.95398	0.000179119
A530016L24Rik	46.4352	1.95131	0.007137
Abca4	66.5511	1.9452	3.37912e-07
Dock8	275.29	1.94404	3.95195e-05
Cystm1	169.287	1.94255	2.20599e-06
Cdkl1	21.1172	1.94247	0.00187009
Hist1h1c	1898.76	1.93965	2.57221e-07
Slc23a3	79.8074	1.92532	8.132e-05
Pdlim1	2636.81	1.92478	5.0055e-09
Cd59a	250.561	1.92078	1.04068e-13
Aldh3a1	155.603	1.92063	0.000274601
Mrgpre	112.849	1.91622	3.19429e-09
Rassf7	636.397	1.91562	1.67708e-11
Pid1	12.1802	1.91427	0.00297401
Igfbp7	2473.48	1.90994	5.72604e-14
Ntn4	184.271	1.90989	2.25283e-12
Hsf2bp	28.1603	1.90526	0.000526896
Csdc2	64.8768	1.90311	2.8478e-06
Kank4os	15.9161	1.90274	0.0237301
Lamc2	395.784	1.87763	5.50425e-11
Efcab8	17.7495	1.87733	0.0231299
3830403N18Rik	23.8022	1.87208	0.00044972
Gm26912	15.591	1.87174	0.000656555
Tshz3	29.6125	1.86888	0.00138387
Adamts9	285.326	1.86413	5.47961e-07
Gm26651	25.6122	1.85884	0.0171667
Slc7a2	1073.85	1.85781	4.47852e-11
Gm28044	9.24747	1.85384	0.0488452
2310002F09Rik	28.5421	1.85261	0.0392688
Fibin	47.2475	1.84611	0.00298577
Car9	41.7109	1.84487	0.00139027
Igfbp6	10099.9	1.84146	7.0629e-21
NA	188.127	1.83513	0.0326733
Prrt3	27.499	1.83459	0.00119903
Brinp3	129.325	1.83345	7.51215e-05
Gm15128	352.175	1.83241	0.000119013
Nlrp4f	12.241	1.82696	0.0420105
Sap25	22.9336	1.8268	0.0299919
Raet1d	118.664	1.82632	2.01446e-09
Cdh19	11.6423	1.82581	0.0482273
Tmc7	16.6533	1.82414	0.00983209
Raet1e	152.564	1.82179	1.04068e-13
Tjp2	3236.99	1.82091	9.00346e-17
4933438K21Rik	20.6102	1.81983	0.0018378
Mustn1	214.872	1.81225	4.76786e-13
Cd53	21.1945	1.81085	0.0265874
Vwf	71.1865	1.80491	0.000145982
Olfr1314	22.5936	1.80222	0.000435621
Hist1h2be	35.4358	1.79706	0.000607384
Pfkfb3	882.241	1.79655	5.52525e-09
Cryab	13202.5	1.78822	4.80269e-14
Mical1	409.283	1.7874	2.77367e-20
Ercc6l2	120.823	1.7804	6.75632e-09
Klf4	2396	1.77833	8.98918e-21
Akap6	117.142	1.77817	1.72412e-09
Myzap	43.567	1.77702	1.05468e-05
Chrnb1	351.149	1.777	3.12238e-07
Prlr	9.92	1.77434	0.0232011
Suox	3135.58	1.76632	2.99049e-19
Dmtn	35.7838	1.76519	3.80915e-05
Trim63	604.448	1.76278	0.00027546
Ptgir	52.0924	1.76165	8.32713e-09
Klk8	65.8813	1.75715	0.0211199
Lmod1	164.811	1.75005	2.81014e-05
Mndal	41.5969	1.74707	0.000382383
Cntf	90.7066	1.74336	5.40788e-07
Cox6a2	24.8909	1.73568	0.00342701
Rflnb	613.747	1.72649	1.41736e-15
Fuca2	3318.4	1.72592	5.40991e-25
Krt80	423.338	1.72302	1.34921e-07
Cxxc5	218.834	1.71835	4.0669e-13
Prr5	206.04	1.71624	1.43087e-13
Nhsl1	543.136	1.70324	1.40157e-05
Apol9b	84.642	1.69989	0.00035145
Cldn34c1	161.847	1.69834	7.38839e-09
Rnd1	586.338	1.69277	2.84392e-06
Zdhhc2	222.392	1.68623	9.21846e-07
Prorsd1	28.6761	1.68584	0.00122026
Pfkp	1611.63	1.68376	2.38413e-13
Zfp980	23.431	1.68239	0.0217965
Thpo	50.8452	1.67916	0.000124638
Mfrp	16.5064	1.67747	0.007896
Uroc1	10.6707	1.67413	0.0356017
E230025N22Rik	56.1671	1.67299	4.54742e-05
Gm14444	29.8485	1.6722	0.00311014
Tspan33	25.3226	1.67106	0.00498528
Trim30d	101.524	1.67031	0.000281647
Gdpd5	258.317	1.6661	7.58759e-19
Rhox5	444.766	1.66527	1.67864e-08
Gpr39	133.086	1.66076	0.000374534
Svep1	11238.1	1.65958	6.37582e-10
Arhgap20	61.5028	1.65922	0.00432607
Pi15	156.893	1.65233	1.84877e-05
Ccn1	16942.6	1.64917	0.00128152
Dhrs13os	15.2352	1.64695	0.0180193
Fgd6	331.605	1.64465	3.23434e-08
Tnfsf9	487.32	1.64233	8.68972e-10
Fstl3	1713.82	1.64124	5.72604e-14
Gm1141	15.3311	1.63911	0.0308486
Sphk1	627.953	1.63043	5.32117e-07
Zfp981	48.7276	1.62937	0.000388362
Chac1	2414.32	1.6245	2.49652e-10
Tinag	23.1949	1.62186	0.025516
Serpinb1b	80.3828	1.62103	0.000736991
Kcnj15	706.135	1.61956	6.65645e-05
Mgp	2186.49	1.61638	1.727e-06
Gm10382	31.8708	1.60178	0.0421541
Pcdh17	32.8339	1.59819	0.00379514
Smim3	135.046	1.59765	6.04242e-11
Otud1	340.362	1.59473	2.6373e-12
4430402I18Rik	54.469	1.58914	0.0062152
Slc37a2	33.4439	1.5842	0.000236047
Duox2	35.6035	1.58328	0.00517399
Serpine1	8069.15	1.58015	3.30448e-05
Dlk2	145.183	1.57715	0.00015722
Ptgs2os2	206.376	1.57598	0.000428545
Nmnat3	174.672	1.57511	5.50425e-11
Thbd	4214.75	1.57286	2.35915e-10
Cavin2	13533.1	1.56848	2.72509e-05
Slc16a1	2748.76	1.56668	5.69544e-12
Gcnt3	16.2547	1.55797	0.0379932
Ube2t	295.388	1.55702	3.14547e-05
Plscr4	108.354	1.55531	1.71536e-08
Fads3	4292.42	1.54741	1.16148e-09
Fhl1	107.271	1.5474	0.0288208
Txlnb	29.588	1.54691	0.0398373
Gm12439	13.9723	1.54235	0.00942225
Zfp52	703.599	1.53943	0.000584371
Tnr	97.7196	1.52797	0.0128892
Tmem117	124.902	1.52648	1.83588e-07
Tril	35.0587	1.52538	0.00044972
Hrct1	51.6807	1.52414	0.000158195
Gm12454	22.7433	1.52308	0.0417815
Samd10	92.4619	1.52025	5.32117e-07
Rtn4rl2	154.968	1.51894	0.00202025
Cd55	298.581	1.51873	0.00613038
Sh3rf2	283.663	1.51141	0.0113322
Neurl1a	101.678	1.50651	1.13685e-06
Cd80	43.1441	1.50263	0.028302
Eda2r	1123.27	1.49785	2.37899e-08
Pstpip1	90.413	1.49657	0.000188183
Pim1	2348.87	1.49282	9.21312e-05
Gstt1	157.094	1.49228	0.000746501
Acy3	101.983	1.48661	5.79452e-07
Dnph1	336.876	1.48368	1.41963e-05
Slco3a1	1020.79	1.4822	6.12313e-15
Ryr1	20.1311	1.48098	0.0345448
S100a11	28004.5	1.47579	7.01793e-11
Loxl4	984.285	1.47365	1.07983e-07
Colq	10.8199	1.47274	0.0186342
Zfp40	305.318	1.47134	0.0129261
Ogn	19779	1.46776	0.0318245
Mtss1	37.2625	1.46665	0.000410149
Dusp8	245.719	1.46566	4.183e-05
Dmpk	271.59	1.46438	7.51288e-07
Arrb1	618.125	1.46306	3.77426e-12
Inhba	546.698	1.46122	0.0491607
Igfbp4	605.66	1.45702	0.00156333
2210016F16Rik	2097.05	1.44467	9.95907e-10
Glt8d2	963.685	1.44327	2.10647e-09
Gpat3	333.521	1.44065	3.90057e-09
Lancl3	159.496	1.43987	2.69153e-05
E2f6	108.696	1.43903	2.77909e-08
Fat1	9394.68	1.43748	8.77645e-10
Fam241a	67.4537	1.43643	4.99676e-07
Pcdh10	140.297	1.4324	3.58526e-07
Thy1	3489.69	1.42865	1.14168e-10
Col7a1	345.917	1.42585	0.000206048
Sgcd	202.506	1.42571	0.000617526
Nppb	446.926	1.42441	0.00259514
Cltb	2400.27	1.42291	1.71613e-11
Maff	1125.07	1.42154	1.70392e-07
Hist2h2aa2	243.085	1.42067	0.0194697
Gm17382	35.2997	1.41947	0.000398442
Gimap6	24.9888	1.41926	0.000780891
Gadd45g	1363.86	1.41646	1.28017e-06
Gpsm3	22.9222	1.41383	0.00241175
Optn	361.568	1.41316	7.7054e-17
NA	37.8215	1.41254	0.0250316
Nalcn	35.6845	1.41112	0.0400286
Gm16178	25.2223	1.40862	0.0140675
Nabp1	861.666	1.40744	3.429e-08
2610316D01Rik	31.6754	1.40738	0.0293364
Slc9a3r1	541.036	1.40614	6.39468e-08
Ddah1	1706.49	1.4006	1.43816e-05
Ngf	909.539	1.40008	3.76472e-09
Cd274	79.8468	1.39852	4.99676e-07
Angpt4	781.82	1.39542	0.00377579
Ikzf2	190.722	1.39142	0.00242565
Serpinb9	1571.53	1.39124	5.42471e-17
Dnah6	60.0058	1.39014	0.00303321
Pla2g4b	67.6178	1.38871	0.0386504
Tmem88	67.0204	1.3868	0.00106779
Pla2g16	886.313	1.38648	1.00423e-08
Ablim1	3555.85	1.38233	4.51902e-10
S100a7a	436.701	1.37727	2.04356e-05
Nexn	586.759	1.37685	0.00577517
Thnsl2	60.9839	1.37352	4.66652e-06
Tnxb	839.043	1.3723	3.05429e-17
C2cd2	903.626	1.36764	4.82779e-16
Ptgds	167.419	1.36675	0.000707752
Htr2a	66.9065	1.36476	0.000193611
Dlc1	2597.47	1.36414	4.8998e-16
Cemip	8576.3	1.36259	0.00125951
Arhgap18	896.458	1.36237	0.000795158
Spon2	2156.98	1.36131	6.64965e-05
Paqr4	951.034	1.35963	8.64317e-10
Cbr2	50.3359	1.35947	0.0137118
Trib3	1385.44	1.35713	0.000647872
Thbs1	56074	1.35664	0.000342414
Neu3	186.831	1.35601	9.08289e-10
Slco2a1	4121.36	1.35585	1.14489e-13
Gm26809	35780.5	1.35525	0.00014376
Calhm5	378.444	1.35473	8.02777e-16
Kank1	1147.22	1.34374	1.68454e-10
Atp10d	515.968	1.33848	0.000916075
Cgn	236.025	1.3381	0.00198725
Hacd4	175.973	1.33748	0.000389591
Vmn1r-ps128	315.81	1.33562	0.00397155
Fam117a	85.5209	1.33342	0.00357367
Sulf1	1797.81	1.33272	8.08627e-05
Ptgs1	3977.96	1.33135	1.22255e-12
Herc6	237.692	1.32748	2.83506e-06
Man1a	1574.81	1.32692	6.14598e-09
Mfsd4b5	246.147	1.32003	6.24486e-06
4930458D05Rik	61.1937	1.31828	0.00493616
Sync	42.3306	1.31622	0.00417282
Sult1a1	55.76	1.30988	0.0310583
Cyp2j9	75.571	1.30703	3.1098e-05
Aig1	239.708	1.30593	3.30692e-08
Abhd6	166.97	1.3051	8.67364e-09
Rab30	327.368	1.30281	0.00210271
Tlr1	42.2317	1.29915	0.00869224
Fzd4	527.593	1.29647	7.88998e-05
Stac3	27.4495	1.29295	0.00914454
Kcnab3	152.166	1.29178	3.42564e-05
Hist2h3c2	70.034	1.29087	0.0171977
Zc2hc1c	99.2364	1.28828	4.63446e-05
Ccl9	880.619	1.28741	0.00298112
4833417C18Rik	23.3663	1.28169	0.0194284
Gm16364	22.2522	1.28146	0.0133606
Trpm2	50.5079	1.27676	0.0125522
Ctla2b	860.001	1.27478	0.00163893
Agmo	28.0253	1.27477	0.00190696
Atp1a3	132.1	1.27235	0.00423894
Rin3	39.4385	1.27056	0.00717934
Serpina1a	229.691	1.26777	0.00649384
Papss2	2566.38	1.2647	2.23245e-15
Dusp1	2323.36	1.26259	0.000279137
Il15	186.935	1.25738	7.82149e-07
Fam13a	488.683	1.25593	6.1762e-09
4930486L24Rik	435.539	1.25239	0.00473937
Anxa3	7482.76	1.24887	3.74683e-07
Stc2	605.894	1.24867	0.000131777
Tmem38b	711.449	1.24758	5.17545e-08
Dennd3	112.465	1.24756	0.00032967
Ano3	117.044	1.24587	0.00032706
Col11a1	3443.82	1.24337	0.0346395
Rasl11b	155.403	1.24163	0.000270672
Clvs1	109.391	1.23997	0.012167
Ttc39b	2306.34	1.23918	2.0165e-11
Malat1	24972	1.23778	0.000892201
Ube2l6	711.571	1.23717	9.0637e-06
Ripor2	382.915	1.23693	0.00494777
Rarb	39.2521	1.23229	0.0223836
Inava	109.661	1.23032	8.73662e-07
Foxf1	338.94	1.22812	2.19815e-13
Stap2	79.9004	1.22741	5.56517e-05
Sox5	174.359	1.21954	0.0169484
Wnt9a	916.147	1.21801	2.26544e-06
Gabarapl2	2747.47	1.21722	2.32005e-10
Dqx1	97.9924	1.21491	6.47434e-05
Baiap2l1	282.535	1.21322	5.90284e-05
Rab27b	133.451	1.21179	0.00352851
Ahi1	1541.58	1.20653	1.88096e-11
Hoxa1	320.537	1.2055	5.50329e-06
Atp2b4	128.206	1.20508	0.0325047
Steap1	1193	1.2046	0.000489106
Cd14	165.794	1.20456	7.43692e-05
Shroom3	71.8822	1.20409	0.00141621
Ifit1	122.496	1.20128	0.000200955
Crlf1	353.01	1.19828	0.00234525
Dpep1	950.765	1.19243	0.00681752
Col5a2	40728.6	1.1921	1.07274e-06
Ccn4	3715.73	1.19075	0.0340668
Stx11	348.399	1.18965	1.01038e-10
Celsr3	31.2622	1.18885	0.0240938
Stard13	1677	1.1884	0.000892201
Steap2	5089.31	1.18544	3.22881e-08
Npr3	1290.29	1.18483	0.0211199
Ass1	199.832	1.18114	0.000215405
Ehd1	9278.79	1.17661	2.60074e-09
Tln2	2751.79	1.17476	7.98777e-11
Ppp1r12b	4138.33	1.17434	3.6643e-14
Xylb	84.7051	1.17265	2.99276e-05
Csf1r	229.307	1.17216	0.0257787
Depdc7	242.164	1.17138	4.04424e-06
Cd24a	2574.11	1.17068	0.00537719
Pard6b	681.024	1.17051	0.0009381
Afmid	240.574	1.16675	2.5621e-05
Spaca6	1058.43	1.16672	0.00101169
Fgd3	456.621	1.16387	0.00222105
Phactr4	1891.98	1.16108	4.67326e-10
Sdsl	62.0152	1.16042	0.0176658
Arhgap29	5638.4	1.15309	9.31771e-06
Gm11427	43.6166	1.15249	0.0214633
Gm20634	348.125	1.1521	0.000110488
Usp2	268.407	1.14556	0.00441342
Trpm5	54.9835	1.14049	0.0189525
Diras2	135.873	1.13674	0.0199312
Tob1	562.354	1.1334	1.28017e-06
Gm20632	184.179	1.13258	2.25932e-05
Morc4	3288.74	1.12028	4.32898e-09
Slmapos2	3326.36	1.11671	0.000479385
Zfp36	1397.59	1.11147	0.00489815
Gm15287	92.6024	1.10835	0.0156821
Gprc5a	2003.57	1.10397	0.00109274
Maoa	11869.7	1.09926	2.49932e-08
Pkib	43.1685	1.09856	0.0213648
Apol9a	154.793	1.09842	0.00971202
Asah2	1867.36	1.09748	1.05538e-08
Rbm47	58.666	1.09337	0.0440551
Vldlr	180.106	1.09192	0.00737405
Cep295nl	32.7266	1.09156	0.0417815
Mbp	219.51	1.08769	0.000917051
Arl6ip1	275.407	1.0871	2.86956e-11
Prnp	14550.6	1.08427	8.97026e-10
Slc16a11	113.138	1.08422	0.000164844
Slc35g1	93.2118	1.08389	0.00342902
Mocos	401.673	1.08131	2.55494e-08
Jph1	69.6353	1.08041	0.00365843
Fam110c	419.383	1.07819	6.02475e-06
Lama2	873.841	1.07611	0.0021411
Hist1h2al	73.645	1.07228	0.0439429
Gpc6	435.677	1.06982	0.000202491
Stat2	1625.25	1.06941	4.68552e-08
Nadk2	1271.55	1.06935	8.45008e-08
Gm16062	85	1.06929	0.0184804
Boc	364.911	1.06856	0.0024
Tacc1	884.445	1.0675	6.34628e-08
Fign	239.683	1.06738	0.00188341
Isoc1	868.247	1.0668	7.63753e-06
Alcam	657.787	1.06237	0.000160386
Znrf2	1311.36	1.06046	4.7007e-08
Adam11	158.384	1.0587	0.0163133
Pla2g12a	876.474	1.05806	9.28382e-09
Raph1	579.108	1.05781	3.99758e-05
Crip2	63.4424	1.05535	0.000343289
Hbegf	543.538	1.05524	0.00022249
Ahr	292.299	1.05398	8.96136e-05
Plaur	1149.59	1.05353	0.000901276
Tnfrsf10b	1728.08	1.05352	1.93827e-07
Nr4a1	921.089	1.05261	0.0378286
Polk	816.699	1.05189	1.04814e-06
Grk4	204.381	1.05107	1.23748e-05
Gm21750	59.6553	1.04111	0.0419908
Aif1l	2280.4	1.03827	1.08281e-05
Cited2	5203.84	1.03241	2.7614e-12
Ism1	148.832	1.03084	0.0313887
E230016K23Rik	97.9789	1.02839	0.0228935
Gm14296	55.8944	1.02598	0.0355883
Dmxl2	711.167	1.02519	0.00274501
Fcgr4	95.6593	1.02516	0.00918473
Avil	62.469	1.01978	0.0346395
Myom1	84.6285	1.01727	0.00611496
Slc25a25	821.544	1.01207	0.000377046
Stbd1	242.833	1.00976	0.00148425
Lipg	535.173	1.00955	7.17628e-05
Serpinb8	975.251	1.00819	0.000611643
Acot2	886.342	1.00696	1.76053e-06
Platr14	62.6936	1.00617	0.0245414
Vgll3	2688.7	1.00587	0.00303446
Ephx2	595.984	1.00365	8.35829e-07
Chst7	291.627	1.00274	0.000311366
Stim1	2475.82	0.998732	1.45986e-09
Tfpi	73.5739	0.996384	0.0190437
Diaph3	1284.11	0.995029	0.0496356
Stk17b	1172.32	0.9922	4.98987e-07
Gm5620	281.541	0.988481	0.0306071
Zfp951	126.521	0.988216	0.00197843
Hip1	3266.38	0.987921	1.05852e-16
Abca9	166.197	0.985976	0.044652
Rin1	4778.35	0.984975	1.69127e-09
Nrp1	3718.26	0.984476	6.13497e-07
Slc43a3	2964.66	0.984341	0.000765161
Prex2	704.514	0.984232	0.00342701
Atp1a1	13088.3	0.983042	5.92109e-10
Adora2b	955.538	0.980787	1.33845e-06
Dhrs13	291.788	0.980299	0.00458212
Gabre	296.546	0.979045	0.000638769
Slc25a40	773.25	0.978279	2.66815e-05
Dusp14	1099.25	0.969522	2.82718e-05
Mpp5	1955.41	0.967705	1.8658e-05
Il15ra	123.638	0.967547	0.0304254
Fam111a	2899.28	0.967425	0.00561684
Slc39a10	3524.38	0.965803	0.000412507
Col1a1	121831	0.965248	0.000753412
Tent5b	1620.45	0.964555	3.38796e-07
Chst12	2131.44	0.963631	1.0399e-08
Pgrmc1	9425.55	0.963303	4.90631e-13
Pde8b	714.994	0.963113	0.000139415
Fbn1	5465.36	0.96261	0.00237864
Slc25a42	514.849	0.962609	4.21957e-07
Gm11816	245.277	0.961791	0.00125951
Chrd	441.396	0.960975	6.3684e-05
Cd248	6880.53	0.960798	4.5081e-05
Mgst3	998.44	0.959124	5.7922e-07
Zfp53	773.896	0.958557	0.00129006
Bmp2k	1711.02	0.958024	1.87865e-10
Gm15764	62.4239	0.955568	0.00911152
Gm17167	121.345	0.953396	0.0127193
Serpine2	1071.18	0.948346	0.000598518
Gm2115	916.891	0.947087	0.00193363
Serpinb6a	9297.12	0.945663	4.57086e-15
Tubb4a	66.1147	0.943643	0.0107232
Lyrm9	234.522	0.942847	0.00240113
Btg2	1025.67	0.941179	0.00942225
Ncam1	1630.79	0.940578	3.05905e-06
Ptpn21	3194.64	0.937788	7.44853e-08
Prickle1	1065.18	0.934357	8.51542e-05
Mindy2	1585	0.933988	0.00473937
Ulbp1	1078.85	0.933504	0.0035312
Rras2	2707.73	0.932601	9.64886e-06
Hacd2	1385.13	0.928473	5.7922e-07
Myo1c	17434	0.928401	9.55776e-10
Cracr2a	41.7314	0.926232	0.0130803
Fas	523.474	0.926159	0.000509409
Tmsb4x	9263.72	0.926094	1.55424e-12
Phtf2	418.804	0.925396	0.000144632
Lyn	252.21	0.924554	0.00376938
Col12a1	2667.38	0.92455	3.41621e-10
Dbndd2	321.974	0.923997	0.00122427
Kcnk2	223.851	0.92354	0.000324701
Ddr1	5318.49	0.92285	4.98185e-09
Ehd3	485.489	0.922825	0.00235881
Ier3	749.798	0.922072	0.00138387
Gja1	1405.95	0.914216	0.0366653
Gstm2	1617.93	0.914038	0.00074069
Acvr2a	745.877	0.913415	0.000967195
Styk1	452.367	0.912934	0.0155811
Pla2g4a	4766.45	0.912829	0.0127187
Dtd1	634.765	0.912676	5.51352e-06
Pcx	1264.13	0.909562	0.0157572
Fgf10	1182.62	0.909287	0.000294042
Atp11a	5318.33	0.90669	2.0918e-09
Sp140	412.307	0.904604	0.000960951
C1qtnf1	929.018	0.904522	2.0415e-09
Tjp1	4773.97	0.903789	3.23434e-08
Stambpl1	1280.98	0.902571	5.9634e-06
Rusc2	4030.03	0.902405	0.00096353
Emx2	282.5	0.901868	0.00271972
Bag2	1009.74	0.900075	9.04006e-07
Ltbp1	3648.12	0.898362	0.000153786
Cdk18	2832.68	0.897902	8.63844e-05
Gm19705	81.4969	0.895873	0.0170564
Tor4a	194.187	0.892542	0.0026074
Sgms1	1435.26	0.890796	6.94592e-06
Lgals9	3984.47	0.890621	4.47497e-06
Eml5	284.73	0.888885	0.0257988
Stom	2151.23	0.884946	0.00039648
Akap12	11002.4	0.882167	8.06e-05
Jag1	1491.58	0.88126	0.00188341
Rasgrp3	117.912	0.880545	0.0113896
Itga6	3086.58	0.879165	3.38796e-07
2500002B13Rik	80.4231	0.879064	0.00303446
Lgmn	8054.73	0.875677	9.67236e-05
Sparc	83467.8	0.87547	0.000100989
Trim30a	433.048	0.874563	0.00685921
Cdkn1a	10457.6	0.872103	0.00526935
Cobll1	2804	0.87043	5.88226e-10
Slc46a3	77.8282	0.869767	0.0331596
Cd151	4413.73	0.868172	1.76929e-07
Efemp1	43132.4	0.865	6.70869e-07
Osgin1	375.321	0.86447	0.0112101
Dynll2	6105.99	0.863423	9.25241e-11
Hebp2	255.395	0.861547	1.71586e-05
Gzf1	2233.83	0.859934	2.31108e-09
Rrp8	1637.73	0.859644	3.23755e-05
Tnfaip8	770.731	0.858854	2.06007e-14
Prss23os	1155.33	0.856588	0.00801117
Adamts1	17979	0.855347	0.0197842
Col4a5	13744.7	0.852489	2.84258e-10
Mpp6	1620.76	0.849831	0.00176642
Yif1b	1695.9	0.849065	4.21957e-07
2210408F21Rik	135.681	0.847817	0.000158195
Ero1l	4526.18	0.847591	0.00617949
Gsn	46199.2	0.846104	7.99313e-08
Ppp1r15a	3481.36	0.845795	6.45434e-06
Epb41l5	589.556	0.84519	4.43194e-06
Pdgfrl	4182.67	0.844757	0.00339926
Tdg	173.571	0.842622	0.00275419
Apobec1	552.475	0.840105	0.000331312
Tbc1d2	1016.92	0.8398	0.00180399
Lin54	751.046	0.837917	0.00106071
1110046J04Rik	236.266	0.836297	0.0117283
Clip1	4554.96	0.832439	1.57626e-07
Prss23	12096.7	0.83241	8.98542e-06
Ccng1	10250.7	0.831419	1.8038e-06
Pdgfc	1278.89	0.831305	8.2382e-06
Rsu1	5433.91	0.829883	3.43186e-17
Lpin3	493.553	0.829475	0.00270218
Sord	8476.14	0.829427	0.00466007
Psmd8	7697.48	0.827466	0.000112248
2810433D01Rik	81.5747	0.826309	0.0256404
Ackr3	559.072	0.823459	0.0359824
Hsp90aa1	28139.5	0.822684	0.01371
Sorbs3	4375.99	0.822354	1.20012e-07
Efnb1	347.492	0.821429	0.000232447
Tmem45a	630.865	0.819544	0.00498528
Sh3bp5l	2141.08	0.817448	3.79447e-07
Ptprg	2392.26	0.81669	0.00039831
Zfp953	159.308	0.81423	0.0250236
Deptor	1172.46	0.813766	0.0055497
Map2k3os	158.98	0.812452	0.0488606
P4ha1	9161.32	0.811113	0.000140311
Stard10	184.967	0.809933	0.0386002
Sash1	2475.13	0.808761	5.50813e-11
Tns3	8946.53	0.801471	3.29784e-07
Wwp1	1335.55	0.801155	0.00033782
Hoxc5	124.722	0.800485	0.0465873
Col1a2	322977	0.799777	0.000516054
Csf1	14262.9	0.799331	0.00933101
Pdzd7	210.035	0.794071	0.00591523
Fzd7	1499.06	0.793408	4.02401e-07
Lzts3	586.233	0.793084	0.000116636
Adamtsl4	642.44	0.792268	2.35513e-05
Col5a1	27771.2	0.792085	0.00131458
Nudt16	122.149	0.789453	0.00366834
Pxdc1	198.417	0.788849	0.00352967
Mtmr10	1541.37	0.788435	8.40116e-05
Cdh2	5735.01	0.786902	4.82284e-06
Nectin1	1412.4	0.786727	8.20379e-05
Lgals3bp	961.56	0.786298	0.00950283
H6pd	4608.68	0.785855	0.000457855
Tmem173	257.463	0.78496	0.000539878
Qsox1	10100.2	0.784451	3.86138e-05
Tuba1b	52546.5	0.783727	0.0232259
Rnf113a1	147.465	0.783665	0.000651281
Ank2	3380.14	0.782015	1.21903e-05
Enpp4	380.571	0.781189	0.000144849
Pofut1	2332.66	0.781031	0.00154807
Itpr3	5436.34	0.779547	5.60711e-07
Prdx6	12709.3	0.779257	0.000435621
Ext2	5673.34	0.778786	4.13643e-05
Myo1d	3631.06	0.777592	7.06478e-06
Grem1	116.249	0.775949	0.0257988
Slc35e4	1871.81	0.775174	0.00115763
Calhm2	211.522	0.7722	9.48468e-05
Tlcd2	144.263	0.771964	0.0141531
Cgrrf1	795.802	0.765226	1.54532e-07
Camk1	3159.84	0.764969	1.34018e-07
Vopp1	3424.57	0.763759	4.09791e-06
Plagl1	737.43	0.761627	0.0378931
Tuft1	1030.06	0.761568	0.00452214
Nnmt	470.887	0.761264	0.000887104
Daglb	227.501	0.760827	0.00101557
Lgals4	78.2854	0.76022	0.0323365
Ghitm	11802.3	0.758944	5.67547e-07
Psmb10	782.004	0.758296	0.00052087
Ccnyl1	2407.21	0.75827	3.04965e-06
Slc41a3	517.545	0.755816	2.02439e-06
Cyb5r1	3302.74	0.755696	0.00613038
Tmbim1	4932.48	0.754971	3.39368e-06
Dnajb4	1668.42	0.754464	4.02081e-07
Macrod1	694.036	0.7494	0.0228342
Grik5	256.858	0.747949	0.00249526
Colca2	129.851	0.747775	0.00391105
Tns2	5211.11	0.745224	1.03272e-06
Cpox	1136.26	0.742661	0.0114842
A530040E14Rik	89.2667	0.741758	0.0342155
Osbpl10	87.8907	0.741627	0.0191438
Grn	30705.8	0.741093	0.000654791
Adamts5	15137.1	0.740228	0.00929343
Npc1	3965.69	0.73659	0.000159785
Enpp3	439.679	0.735869	0.0242862
Uvrag	2392.79	0.734565	1.62289e-06
Zhx3	1585.71	0.733974	2.76393e-05
Iqsec2	575.081	0.733794	7.82553e-05
Tlr4	2569.99	0.732176	0.0013433
Col8a1	3683.9	0.732122	0.0327948
Epn2	3510.42	0.729407	0.000116636
Itpr1	2029.83	0.728778	1.58489e-05
Atp10a	1864.78	0.727357	0.0126617
Radil	568.492	0.726697	0.000221072
Sms-ps	1178.87	0.726549	0.00106899
Galnt10	2209.83	0.725474	0.000225238
Map3k20	2221.02	0.724632	4.30253e-06
Pcdh1	2459.62	0.722868	2.13509e-05
Mgat3	1523.24	0.722712	4.05076e-05
Plod2	1368.67	0.721878	0.00184139
Pcgf5	1180.44	0.720254	6.1291e-06
Rdh10	613.145	0.71955	0.000114806
Angptl4	1038.17	0.719428	0.0311277
Dab2	7942.18	0.719092	0.00191289
Gm12346	480.59	0.716621	0.048771
Hoxa4	123.194	0.716299	0.0199811
Akap2	11618.7	0.7162	2.81014e-05
Cav1	38978.1	0.715231	2.40275e-07
Zfp809	553.77	0.714972	0.000697325
Adipor1	9075.21	0.713125	0.000120166
Crebl2	1856.82	0.712836	3.61088e-05
Arvcf	1255.27	0.712833	1.74494e-05
Flnb	18993.6	0.711551	9.41191e-06
Abhd14b	229.661	0.710944	0.0121596
Syne2	2077.97	0.709546	0.00178862
Plekhf2	391.596	0.70918	0.000137697
Il6st	23732.5	0.707376	0.000442675
Man2b1	3916.82	0.706134	0.000159107
Amotl1	7811.02	0.705401	5.73305e-06
Dock4	204.616	0.704646	0.00424522
Cfl2	7309.76	0.702963	0.000104161
Nqo2	413.421	0.701873	0.00220823
Spire1	861.397	0.701383	0.000270672
Sap30	554.942	0.701235	0.00737405
2200002D01Rik	188.591	0.700603	0.0355468
Cyb5r3	22966.3	0.697092	9.90598e-06
Lrrc51	118.586	0.696898	0.00345344
Asap3	387.6	0.696722	0.016971
Fez2	3426.09	0.696495	0.000579928
Tango2	725.875	0.695492	3.43188e-06
Ifi203	486.725	0.694443	0.00231415
Tmem245	7288.01	0.693603	1.11134e-05
Dlg3	2321	0.693059	3.02108e-09
Hipk2	2809.34	0.692273	2.88409e-05
Fth1	88712.8	0.691273	0.00447776
Pank1	534.818	0.690848	0.00343245
Prkci	7019.67	0.690639	0.000211886
A930004D18Rik	436.695	0.690491	0.00822501
Gm10516	98.2277	0.6904	0.00757763
Mink1	2720.96	0.690392	4.71949e-08
Ino80c	526.2	0.690019	0.000190822
Utrn	8786.27	0.689891	6.1291e-06
Hotairm1	163.786	0.686839	0.012051
Gsto2	540.367	0.686466	0.0100323
Abca5	1770.48	0.685148	0.00882628
Neo1	4545.56	0.684835	1.60006e-09
Nop10	1906.59	0.683492	2.03054e-06
Endod1	423.569	0.683379	0.00706692
Cfap157	270.246	0.682608	0.00072029
Lats2	3075.23	0.681634	2.25288e-05
Pros1	1181.25	0.681577	0.00012768
Dysf	3326.04	0.679825	0.00470627
Rab20	279.557	0.679541	0.0135745
Creb3l1	1785.61	0.679533	0.0155821
Crim1	4958.72	0.679235	0.0146377
Arhgef18	3617.65	0.678624	1.33554e-05
Usp13	226.286	0.67528	0.047138
Osbpl5	2420.06	0.674696	0.000160626
Cda	445.524	0.673031	0.0102504
Hikeshi	958.391	0.667675	9.43603e-08
Fam110a	459.328	0.66697	0.0385241
Hspb6	825.736	0.666159	0.0446603
Gstt3	236.484	0.665396	0.00765579
Ttc12	284.539	0.665089	0.0297989
Slc1a5	4845.64	0.66384	0.00331851
Prr5l	589.662	0.663504	0.0437787
Disp1	2262.13	0.662589	9.40532e-09
Anxa1	40517.7	0.662233	3.14547e-05
Pgam1	19698	0.660919	0.00369343
Spsb1	515.999	0.6603	0.000202819
Large1	4374	0.659571	4.26896e-11
Macf1	20441.9	0.659078	0.0130801
Plod1	3492.52	0.658543	0.000702567
Atp1b3	3296.65	0.658184	0.000549651
Enpp5	660.232	0.657775	0.0203958
Rbms2	13507.5	0.657309	0.00555924
AI429214	333.036	0.656766	4.59628e-05
Chfr	2461.95	0.655023	0.000960951
Lmbr1l	980.758	0.652366	0.0116851
Hspg2	28446.7	0.652274	0.00697992
Gclc	1433.97	0.650246	0.00313679
4930523C07Rik	776.032	0.650149	0.0308736
Orai1	454.009	0.647983	0.0127187
Adam9	10091.1	0.647861	0.00147859
Naaa	680.275	0.647291	0.00234143
Plpp1	5028.84	0.646645	0.00277338
Mafk	2125.93	0.646345	0.0201829
Osgin2	294.272	0.645955	0.00412434
H2-K1	1381.17	0.645604	0.00335797
Erich1	560.534	0.644754	0.000192876
Ap1s2	981.329	0.644074	0.00146091
2019-03-03	99.1951	0.642779	0.0386975
Abca3	2846.91	0.640993	9.0637e-06
Fbxo32	1611.24	0.638161	0.0338623
Apcdd1	937.525	0.637516	0.00114427
Dnaja4	286.777	0.636319	0.0301522
Myl12a	24114.2	0.636315	3.3275e-05
Slc39a13	2542.7	0.636028	0.00183949
Pld2	1123.43	0.634486	0.000736991
Lrrc27	419.785	0.633966	0.0405403
Tesk2	669.592	0.632811	0.00183681
Dhrs9	1469.94	0.631942	0.0355
Apba1	301.824	0.63096	0.0297917
Slc19a1	824.104	0.629181	0.0391759
Gmpr	213.327	0.628993	0.0137118
Paics	14440	0.628799	1.98362e-18
Zfp595	165.656	0.627889	0.0487296
Bsg	26626.7	0.626807	0.002723
Slc16a13	668.48	0.626669	0.00199415
Pqlc3	1007.22	0.626538	0.00115849
Prps1	1657.91	0.624401	0.00110911
Hras	1694.37	0.623121	0.00365337
Fyn	3259.62	0.621389	1.52923e-09
Tmem62	479.903	0.620888	0.0025611
Zfp57	2113.08	0.620469	0.0330614
Ftl1	156446	0.620398	0.00780866
Haus8	750.97	0.620219	0.0417107
Pex13	1616.35	0.62001	1.30894e-06
Ptges	1888.1	0.619998	0.0143422
Snap47	3433.56	0.618561	7.24643e-05
Esyt1	2873.96	0.617357	3.30088e-05
Plpp2	931.329	0.616713	0.000896668
Ubl3	1139.36	0.616011	4.03394e-06
Rtn3	10304.3	0.615865	8.16917e-05
Man2b2	7485.81	0.614765	0.00225513
Hoxa6	269.207	0.614111	0.0247427
Gm26691	125.395	0.613317	0.0407428
Cyb5a	3603.74	0.611769	0.0022768
Acaa2	2550.42	0.610677	0.00602349
Tex2	1768.88	0.609302	1.51708e-05
Mcub	378.097	0.608761	0.0247874
Itgb1	37771.6	0.608703	9.40313e-09
Ldlrad4	327.725	0.607908	0.00110911
Dst	14726.7	0.607363	0.00349508
Nomo1	5376.94	0.605716	0.0102075
Slc48a1	9279.75	0.604767	0.00163792
Wdcp	317.267	0.6039	0.00865146
Rb1	846.903	0.602681	0.00379206
Zhx2	795.621	0.601976	0.0228342
Glce	2652.83	0.601572	0.00473937
Ifngr1	2047.3	0.600885	9.27024e-07
Fbxl2	422.339	0.600854	0.0201997
Pdzrn3	1450.78	0.600603	0.00501272
Aph1b	607.012	0.599281	0.00525344
Glb1l	1400.04	0.599181	0.00223933
Irak2	771.003	0.598205	0.00148425
Telo2	1265.21	0.597547	0.00106297
Cyp39a1	736.973	0.597187	6.12391e-05
Usp12	2202.54	0.596035	5.75866e-06
Trim7	396.682	0.595659	0.0108125
Exoc6	416.782	0.59527	0.0179178
Zfp763	273.826	0.595191	0.0406396
Mtus1	3124.59	0.594003	0.0201507
Flot1	2483.62	0.593735	0.0022063
Ide	5488.79	0.593444	0.000245493
Thsd7a	4019.13	0.592974	0.0107069
Ppip5k1	941.108	0.59195	1.51518e-05
Ehd4	2099.21	0.591938	0.000946254
Mlh3	176.758	0.591535	0.0408818
Sec62	6353.82	0.59054	0.00126947
Naga	3447.19	0.589956	0.0049921
Cers6	4036.26	0.588259	0.000421887
Heg1	6138.24	0.587978	0.00360772
Acyp2	175.948	0.587964	0.0078475
Abcb1b	1465.6	0.58713	0.00470627
Tef	3446.4	0.586953	0.0125662
Sms	1954.67	0.586241	0.0020848
Tpm2	4623.6	0.58598	1.33335e-06
Lrch1	792.257	0.582279	5.45096e-05
Dzip1l	1361.68	0.581502	3.9868e-06
Nagpa	1014.53	0.580037	0.00315765
Cacna1c	477.688	0.579802	0.0294791
Cuedc1	1729.79	0.579695	7.2827e-05
Rap2b	1894.25	0.578696	2.61225e-06
Abcg2	2509.43	0.578356	0.00161318
Gm43517	631.92	0.577831	0.0277833
Lamb2	7100.08	0.576064	0.043116
Slc35d1	859.598	0.575965	2.84392e-06
Cbx5	6654.6	0.575939	0.0404599
Me1	3504.25	0.575667	0.000196721
Cdk6	743.129	0.574959	0.00270366
Ptpmt1	905.176	0.574524	0.000249303
Cdc42bpa	4204.49	0.574244	0.0361724
Txnrd1	11050.7	0.574095	0.00644674
Slc38a4	4435.55	0.573068	0.0315569
Nucb1	11251.8	0.572502	4.15571e-06
Nhlrc2	1888.9	0.572268	1.92113e-06
Magi3	1822.47	0.57226	0.0179662
Tsc22d2	3177.02	0.571685	0.0143936
Pigl	298.542	0.571033	0.000352434
1110012L19Rik	1013.89	0.570842	0.00124781
Hsd17b10	3298.47	0.570778	0.00117456
Syngr2	2533.95	0.569413	1.94169e-05
Fam177a	1383.29	0.568387	0.00183681
Clic4	7974.14	0.567468	0.009172
Gpr155	418.013	0.567314	0.0176376
Vcl	15499.8	0.566775	4.58692e-05
Ifrd1	4709.93	0.565766	0.0296907
Ccn3	191.591	0.565347	0.0457435
Fut11	609.835	0.565045	0.00406745
Klc1	5592.89	0.564268	2.12058e-07
Stip1	10290.2	0.56355	0.00860363
Tep1	1733.77	0.561574	1.26776e-05
Rpain	423.731	0.561485	0.00648077
Azin2	2031.84	0.561212	0.00994358
F2r	8616.17	0.561005	2.19042e-05
Il10rb	939.898	0.558996	6.41706e-07
Mrc2	8828.93	0.558373	0.0114317
Napb	476.588	0.55757	0.00342701
Nudt7	341.509	0.556789	0.00148018
Ezr	2125.96	0.556466	0.00101169
Ctbs	628.373	0.556283	2.62072e-05
Cpeb3	346.758	0.554836	0.0153955
Tmpo	7007.13	0.554518	0.0101103
Gpx4	15070.7	0.554311	0.00796771
Tmco3	1560.17	0.553648	2.43787e-05
Itpripl2	5913.85	0.552475	0.00012815
Rhod	1593.06	0.551545	0.0177873
Exoc3l	208.874	0.551463	0.008442
Samd4	3008.14	0.55039	0.000145289
Prkce	764.757	0.550147	0.000771467
Map1b	6864.42	0.548075	0.00494011
Ctps	9423.68	0.547685	0.00822501
Cd47	2998.69	0.546968	0.00595197
Fut8	1050.84	0.545386	0.000656583
Nudt18	604.058	0.54431	0.0086467
Scamp1	1792.18	0.542608	0.00269344
Prdx5	5188.91	0.542174	0.00130462
Galm	284.678	0.541803	0.0254794
Galk1	1811.4	0.541071	0.0162599
Adamts10	953.872	0.54065	0.000100817
Ptch1	475.914	0.539009	0.00335147
Mosmo	928.799	0.538587	0.0075112
Abca7	2260.68	0.538571	0.0078567
Cdipt	3223.08	0.537211	9.49359e-06
Myo6	987.17	0.53699	0.00371919
Lamc1	22727	0.536653	0.00146071
Pde4dip	2967.36	0.536386	4.85319e-11
Tspan9	8905.53	0.536311	0.00685921
H2-DMa	231.974	0.536108	0.0398274
Dusp3	2333.35	0.535916	0.00617335
Sptbn1	59834.8	0.532563	0.0036564
S100a6	44661	0.531598	0.0178272
Tmem60	583.239	0.531277	0.000216287
Ctif	1560.76	0.531204	0.00015279
Abi2	1463.95	0.52909	0.00125472
Kremen1	3328.73	0.528922	0.000163253
Wwc2	6641.56	0.528868	0.000135052
1810037I17Rik	1837.47	0.527902	0.000593383
Lgr4	1019.43	0.52774	0.0188266
Sptan1	24705.8	0.527735	0.000423692
Pcdh7	730.661	0.526678	0.0437497
Tnfaip1	4512.56	0.526338	0.000100484
Ube2h	7839.74	0.525945	0.0398274
Slc20a2	2786.73	0.525581	0.0022597
Cd81	15598.9	0.525138	0.0177582
Tns1	7417	0.524729	0.000974407
Ap4b1	1040.57	0.523382	2.01245e-06
Ttc7b	1433.93	0.522869	0.000636988
Emilin1	5288.59	0.522159	0.0355883
Snx7	2260.56	0.521758	0.0424354
Pml	1978.1	0.521703	0.00670964
Emilin2	6079.77	0.519392	0.00013083
Pcdhb22	261.12	0.518867	0.00598002
Tfdp2	1412.09	0.518429	0.0143027
Ncoa3	2075.84	0.517543	4.3911e-06
Cd99l2	3754.26	0.514688	0.000131904
Sike1	1752.91	0.514454	0.000912689
Tpk1	262.273	0.514408	0.0242517
Dlg1	7243.82	0.513461	0.00852741
Ostf1	2423.37	0.513067	5.51352e-06
Nrip1	567.816	0.512399	0.00958685
Abhd17c	2306.6	0.509935	0.00479083
Smco4	219.148	0.509827	0.0358867
Lonp1	6941.8	0.50796	0.00362601
Coq7	524.639	0.50795	0.00384367
Net1	1218.27	0.50791	0.0115409
1700047I17Rik2	769.112	0.504137	0.00764567
Cald1	39536.2	0.503503	0.0175026
Cav2	3663.33	0.5027	0.0261652
Lrrk1	3325.76	0.502644	0.00145099
Usp32	4236.09	0.501567	0.0199731
Gng8	129.103	0.50094	0.0350556
Ccdc181	639.329	0.499379	0.0033228
Sdhaf2	1871.04	0.498967	0.00014376
Hoxa5	641.171	0.49846	0.0152649
Clcn5	3296.84	0.497146	2.31633e-09
Fyco1	2113.39	0.496664	0.000234313
Magi1	863.009	0.496587	0.00160687
Mief2	738.724	0.496552	0.0439178
Galc	1514.6	0.495779	0.00298164
Ebna1bp2	3539.68	0.495586	0.0348391
Mfsd8	360.644	0.493661	0.038801
Uxt	499.676	0.492398	0.0236973
Arhgdib	13907.1	0.491966	0.0146419
Specc1	3432.28	0.490903	0.0338655
Ahnak	67844.7	0.490595	0.00320519
Sec14l1	5437.38	0.489653	8.36276e-05
Chchd4	753.278	0.487764	0.0113737
Gm11110	223.663	0.486894	0.0361428
Jmjd4	1066.64	0.486537	2.33061e-05
Htra1	323.733	0.486513	0.0188517
Cachd1	1495.5	0.48573	0.00325038
Aldoa	31312.4	0.485101	0.0415861
Slc19a2	1917.48	0.484743	0.00875642
Fig4	2668.68	0.484007	0.0123745
Limk2	1846.81	0.483793	0.00271492
Tead1	8305.98	0.482216	0.0018353
Npnt	449.344	0.480604	0.0415699
Bnip3	1792.54	0.479526	0.0125012
Vcam1	8733.75	0.478599	0.000865007
Rapgef2	1760.9	0.478318	0.0209808
Slc9a1	2227.4	0.47684	1.41963e-05
Ankrd40	3457.24	0.475927	6.05655e-05
Cox5a	4353.77	0.475918	0.00744707
Amotl2	15490.2	0.475111	0.0464455
Fdx1	723.867	0.474211	0.0388223
Znrd1	628.223	0.472656	0.0490282
Narf	1213.77	0.472328	0.0382757
Mvp	5662.64	0.472042	0.00987502
Slc22a5	722.565	0.471753	0.0127603
Inpp5k	2174.2	0.471261	0.0218132
Tcf7l2	966.997	0.470731	0.011122
Acap3	1180.43	0.470373	0.00865156
S100a10	14257.3	0.46983	0.00380935
Gng12	10176.6	0.469681	0.00581799
Epb41l4a	2231.96	0.469126	0.000297189
Fat4	5165.51	0.468997	0.0492678
Ccdc9b	3998.15	0.468758	0.00186056
Slc23a2	2101.09	0.468546	0.0365209
Lactb2	1674.43	0.466091	0.0264066
Tmsb10	24402.9	0.465817	0.00942225
Ddr2	21485.5	0.465352	0.0496356
Nmnat1	220.61	0.465261	0.0168518
Hoxc4	166.514	0.46511	0.0434785
Mfsd12	933.956	0.46365	0.042789
Ogfod1	1856.05	0.463487	0.00315326
Rab29	491.98	0.462863	0.0101057
Fn3krp	425.753	0.459561	0.00834717
Atl2	1798.46	0.45897	0.000602113
Pfdn4	874.693	0.458326	0.00583844
Emp3	1776.51	0.45681	0.0303427
Arhgef5	944.691	0.455365	0.00318659
Slc8b1	1315.17	0.455075	0.0478586
Smpd1	2430.28	0.454932	0.0256215
4921524J17Rik	641.611	0.454799	0.00432397
Cers4	1306.68	0.454567	0.000655673
Insig2	2774.63	0.454091	0.007137
Fkbp10	8574.96	0.45302	0.0287495
Otud7b	4504.23	0.452553	1.6556e-06
Abcc1	6563.18	0.452518	0.00275419
Dtna	3290.17	0.450006	0.00654663
Prrx1	19059.6	0.449939	0.00143239
Ctsl	40956.2	0.449938	0.0136298
Ampd3	3598.28	0.449871	0.010059
Acot9	3567.36	0.449652	0.0255125
Rtn4	18961.5	0.449058	0.00404644
Cnnm4	356.218	0.448622	0.0166436
Kank2	6902.79	0.447819	0.000617526
Ctnnal1	2217.42	0.447726	0.0464649
NA	1559.71	0.447562	0.0345708
Map1a	6290.43	0.446292	0.008442
Thnsl1	299.735	0.445408	0.0333255
Bcl2l1	4294	0.444677	0.0302921
Tmem106b	10840	0.444604	0.0488442
Tpm1	28225.3	0.444241	0.000878274
Etfb	2261.36	0.443307	0.00625505
Bag1	4120.74	0.441914	0.0113737
Got1	2662.48	0.441517	0.0142709
Sema3f	4201.92	0.440462	0.0228401
Cdk5rap1	416.98	0.440296	0.00161944
Col4a3bp	1675.62	0.44009	0.00454595
Irgm1	1281.38	0.439186	0.00494777
Ak1	2929.21	0.439146	0.0113737
Hprt	2471.18	0.438637	0.0284219
Pear1	2676.77	0.437977	0.0107896
Rbm18	1817.8	0.437765	0.0225565
Nsmaf	1785.08	0.437712	0.000382172
Ap2a2	11186.2	0.437627	0.00467986
Add3	3445.32	0.436945	0.0110916
Adarb1	849.01	0.43551	0.0234284
Necap1	2428.8	0.434206	0.0024
Arfgap1	3463.67	0.433261	0.00608909
Ganab	13601.1	0.432467	0.00018074
Traf6	1586.59	0.432147	8.06e-05
Mitd1	486.746	0.431765	0.0460612
Akap13	5008.33	0.430962	0.02154
Erlin2	2954.04	0.430014	0.0046455
Itprid2	2850.83	0.428899	0.000377046
Eya1	701.829	0.428861	0.00125825
Pdia6	14361.8	0.428527	0.0106011
Rab10	6118.68	0.428491	0.000204377
Map2k3	4419.74	0.428289	0.0200167
Tmem80	217.739	0.427632	0.0404599
Dagla	576.298	0.427503	0.00333927
Gin1	216.262	0.425952	0.0486393
Lrrc75a	924.749	0.424465	0.0175364
Vwa8	2171.69	0.424043	0.0193945
Dag1	10803.4	0.423923	0.000656583
NA	387.349	0.423202	0.00610318
Mprip	17779.7	0.423033	7.4608e-07
Tmem135	1215.61	0.421616	0.0212997
Mapk14	3703.83	0.42111	0.000315874
Stx16	1833.51	0.420712	0.046527
Isca2	752.086	0.419233	0.00244342
2019-09-11	12235.3	0.419188	0.00645884
Galnt1	3098	0.418171	0.0117573
Adar	2479.58	0.417853	0.00101344
Pde10a	470.057	0.4149	0.0156378
P4hb	39144.3	0.413217	0.0348391
Piezo1	14797.3	0.409178	0.029056
Myadm	15438	0.408393	9.10591e-05
Edem1	4433.87	0.408137	0.000375919
Ripor1	4272.02	0.407205	0.00325038
Plekhb2	3753.77	0.406775	0.0402154
Eci1	1615.09	0.406196	0.007137
Cd109	12991.4	0.406004	0.0461347
Mr1	1889.34	0.405321	0.0246742
Sri	3410.65	0.404159	8.53646e-05
Nat10	2589.32	0.403994	0.021993
Phka2	2086.32	0.402999	0.0158036
AC149090.1	18121.4	0.401888	0.00636222
Dnajb6	7299.02	0.401836	0.0142535
Cyld	2898.73	0.401815	0.0399851
Mthfr	3144.2	0.401098	0.0110326
Ptp4a2	11669.3	0.399988	0.0081699
Atl3	9377.88	0.398398	0.0340096
Entpd4	1607.12	0.398309	0.0186342
Wfs1	1732.71	0.397445	0.0228342
Fbxo10	1508.82	0.397244	0.0322461
Ajuba	2948.79	0.396295	0.0304084
Snap23	1353.92	0.395844	0.00709696
Gpx1	3782.34	0.395844	0.0359952
Taok3	2501.87	0.395428	0.000293147
Sqor	2866.17	0.395106	0.0105356
Arhgap17	1804.27	0.394166	0.000516081
Fuz	552.498	0.392324	0.0300912
Cpd	4849.18	0.392115	0.0195464
Kpna6	7686.85	0.391815	0.00188525
Hspb8	6743.15	0.391224	0.0219208
Dcaf17	807.489	0.391052	0.0345708
Elob	5284.4	0.390686	0.011057
Ehbp1l1	2904.93	0.390618	0.00737405
Uaca	2130.93	0.390157	0.0295698
Cnnm2	1162.64	0.389981	0.0341218
E130308A19Rik	977.579	0.388642	0.0355988
Vti1a	1513.74	0.388458	0.00760033
Higd2a	2214.02	0.387411	0.0328274
Gm10561	210.128	0.38734	0.0455279
Cdkn2c	2309.99	0.387114	0.0240004
Arpc2	10253.1	0.386673	7.5581e-05
Rad23b	17055.9	0.384944	0.0297917
Helz	2920.11	0.384367	0.00278612
Iqsec1	6250.87	0.383158	0.0341076
Samd8	1859.77	0.381579	0.016637
Cnn2	23457.3	0.380563	0.0101156
Tmem38a	516.326	0.380359	0.0285211
Ugp2	4229.53	0.380066	0.00790192
Trmt1l	1562.33	0.379971	0.000788681
Nudcd3	5085.87	0.379826	0.0457179
Faf1	5358.73	0.379652	0.00943391
Fam104a	1760.12	0.379437	0.0338808
Lmbrd1	2417.68	0.378924	0.0133324
Aifm2	1026.37	0.378684	0.00694655
Creb3	1212.47	0.378373	0.0486805
Cast	5248.56	0.378058	0.000508632
Elf4	2047.78	0.37796	0.000533355
Nectin2	3231.19	0.375478	0.0302146
Wdr44	567.308	0.37454	0.0291308
Agpat5	1466.32	0.374391	0.0219315
Ptpn12	2592.98	0.373702	0.0310917
Dnm2	5735.56	0.373653	0.0472609
Hibadh	3736.29	0.372774	0.0322461
Rdh13	1335.03	0.371862	0.0265493
Tnrc6c	2070.11	0.371558	0.000992095
Ptgfrn	7767.77	0.371454	0.0457179
Mpp1	3836.69	0.370188	0.0463505
Aph1a	5523.67	0.370081	0.0283954
Aak1	1915.97	0.368328	0.00525943
Larp4b	2101.21	0.367415	0.00884
Cpt1a	5815.36	0.367211	0.00277173
Slc39a6	3751.1	0.366995	0.0454285
Notch2	5564.2	0.365819	0.00609359
Pip5k1a	3867.2	0.365771	0.012108
Pigg	682.519	0.365638	0.0466002
Xpo5	4096.28	0.365533	0.0439429
Ywhah	6364.92	0.365439	0.0378236
Vps53	1711.37	0.364664	0.00152243
Osbpl1a	1582.54	0.364586	0.0324167
Vps36	2824.13	0.364112	0.00458358
Trim8	1911.48	0.363702	0.00408266
Zfp91	7065.38	0.363399	0.00632808
Eif3c	17700.4	0.362631	0.00637334
Tsku	1205.34	0.358867	0.0229352
Ehd2	12732.3	0.358015	0.0167062
Cdc42se2	2787.71	0.357489	0.00039298
Cdc42	11259.1	0.354689	4.09731e-05
Pygo2	2490.29	0.352486	0.00566343
Rubcn	3167.97	0.351942	0.0161983
Rapgef6	1995.6	0.35117	0.0386063
Ptprf	4297.63	0.351074	0.00150761
Kif1c	11260.9	0.349781	0.0325047
Fam98a	1905.21	0.34875	0.00518095
Pacsin2	4361.92	0.348603	0.00496133
Plxnb2	19455.3	0.347736	0.0253799
Tmem128	899.217	0.345685	0.0341439
Pnpla6	1143.85	0.345551	0.011765
Zfp39	324.659	0.345028	0.0316057
Rab7b	1493.16	0.343905	0.0303768
Txndc12	3770.54	0.343579	0.022671
Chmp2b	2474.73	0.343435	0.0223256
Cipc	1168.35	0.342668	0.00764567
Prkag2	1252.87	0.342584	0.0176247
Bcl9l	4861.61	0.341588	0.0042133
Snap29	2083.04	0.341267	0.0266442
Nfe2l1	17080.7	0.341186	0.0457179
Pdha1	9868.08	0.340508	0.000636988
Parva	10879.8	0.340178	0.00987502
Gpd2	3642.52	0.339947	0.00279292
Nsf	2095.64	0.339807	0.00431494
Polr2e	3801.98	0.339498	0.0459641
Zdhhc3	3899.94	0.338591	0.0304774
1700021F05Rik	907.393	0.335733	0.00113054
Tor1aip2	6209.14	0.33421	0.000264456
Vapa	4514.82	0.333756	0.0449001
Pi4ka	5631.27	0.330665	0.0042888
Ddb1	78266.8	0.330347	0.0318245
Ncstn	4112.5	0.326657	0.0160006
Anxa7	4754.84	0.325815	0.00494011
Bmp1	4680.34	0.324686	0.0121053
Pea15a	11198.5	0.321712	0.0471158
Myl6	22034.8	0.320819	0.000298259
Sh3pxd2a	15740.3	0.320387	0.000341972
Aldh3a2	3225.87	0.319785	0.00803387
Ankrd13c	1592.95	0.316236	0.0217143
Ascc2	3721.49	0.316177	0.0237009
Man1b1	5748.07	0.315102	0.0149155
Emp2	4062.73	0.314231	0.00481104
Smarcd3	630.858	0.312333	0.0294455
Rapgef1	5967.04	0.311721	0.0453305
Npepps	9806.65	0.311048	0.0358768
Utp23	570.547	0.309468	0.00914454
Slc1a4	3460.18	0.308778	0.0468856
Serinc3	12902.5	0.307503	0.0365209
Osbpl11	1140.02	0.305105	0.0158377
Lmtk2	2086.19	0.30222	0.0149039
Zzef1	3506.29	0.300327	0.0137118
Ptpn14	6806.86	0.299179	0.0220297
Stat6	5625.01	0.299154	0.00179256
Ccser2	3364.43	0.297681	0.0374294
Kif1b	4905.83	0.297231	0.0191121
Vrk3	1213.54	0.296537	0.0214965
Zfyve9	2465.72	0.293987	0.0201861
Pomgnt1	3559.58	0.292834	0.0298528
Socs6	1293.8	0.290525	0.0491063
Stat5b	2117.46	0.288683	0.00602349
Plgrkt	1248.26	0.288403	0.00414744
Tln1	13133.5	0.285042	0.0424354
BC031181	1034.18	0.284462	0.0349069
Adam17	3233.21	0.279131	0.00450917
Hipk1	4679.27	0.277689	0.0261189
Araf	2783.28	0.275736	0.0134969
Pitpnm1	3326.04	0.274572	0.0488563
Minpp1	2115.19	0.271772	0.0261497
Ccdc43	996.76	0.271289	0.0471697
Epb41l3	11414.4	0.270761	0.019957
Cyfip1	6745.9	0.270607	0.0282332
Cdk11b	2039.57	0.270067	0.0275159
4931406P16Rik	2722.44	0.269373	0.0478586
Adcy6	3708.43	0.268779	0.0125662
Sfxn3	5162.31	0.264614	0.0462673
Utp11	3221.33	0.262554	0.047731
Man2a1	13475	0.259411	0.0338655
Tmbim4	1686.78	0.258015	0.0490771
Fam114a2	3449.45	0.256961	0.00482132
Zfyve27	1433.9	0.248889	0.0217266
Habp4	1289.07	0.24881	0.00365464
Tmem131	4629.57	0.246121	0.0195399
Ubr5	12270.5	0.243176	0.0362152
Gpx8	2857.9	0.241609	0.0203958
Cers2	6182.42	0.237682	0.0399808
Heatr5a	3537.03	0.230496	0.0239327
Nras	3618.57	0.22392	0.0323562
Eml3	1886.2	0.223486	0.0375396
Gnb1	10433.3	0.22312	0.00367083
Agl	3359.57	0.213325	0.0199177
Glud1	8559.98	0.211511	0.0152151
Zfp106	11251.1	0.208048	0.0126502
Kif3b	2552.9	0.187415	0.0327645
Uri1	1845.88	-0.184472	0.0173326
Ppp2r5e	2577.24	-0.186804	0.0284697
Yap1	5868.32	-0.187134	0.0426801
Kdm1a	3091.89	-0.194058	0.0308243
Fem1c	1546.41	-0.203771	0.0471207
Abcd3	3631.05	-0.203933	0.0181078
Wwtr1	5195.54	-0.204088	0.0425386
Slc36a4	1156.58	-0.205466	0.0342185
Plxna1	20953.2	-0.211878	0.0222202
Fcf1	1579.92	-0.213209	0.0404146
Ddx6	7985.74	-0.214675	0.0486805
Qrich1	3515.07	-0.21706	0.0413923
Ppfia1	3284.49	-0.229999	0.0327645
Armc1	1584.7	-0.235135	0.0350026
Men1	2488.41	-0.235842	0.0355143
Kirrel	13677	-0.239076	0.00406745
Ccny	4186.36	-0.241404	0.0185033
Zmat2	2291.27	-0.241415	0.0347977
AI597479	1129.33	-0.241845	0.00566343
Prdm2	2816.52	-0.242736	0.0415861
Ctbp2	1278.49	-0.243641	0.0278718
Ago1	6615.47	-0.243787	0.00406745
Swi5	5268.15	-0.244501	0.0166717
Cdc5l	3272.3	-0.245551	0.0395112
Wdr59	1368.37	-0.247652	0.0373117
Chd4	15088.8	-0.249483	0.0245836
Hdgfl2	4078.47	-0.252983	0.0463505
2610002M06Rik	1470.1	-0.253171	0.034766
Ddi2	2416.31	-0.25346	0.0283409
Smug1	791.191	-0.25395	0.0380557
Gng10	2800.64	-0.254894	0.0257906
2610301B20Rik	1235.42	-0.258415	0.0449001
Trip12	11199.4	-0.258961	0.0242121
Chtop	5837.65	-0.260253	0.024776
Taf2	2167.71	-0.260348	4.68101e-05
Pprc1	3591.05	-0.266021	0.0495271
Rpl36al	5933.51	-0.26666	0.038253
Cdk5	1892.49	-0.266922	0.0302921
Smarce1	5139.95	-0.267426	0.0175122
Ythdf2	2107.95	-0.270268	0.0374294
Ctcf	2881.75	-0.270977	0.0194984
2810004N23Rik	1657.13	-0.271257	0.0205974
Thumpd1	2170.67	-0.272778	0.00267649
Cttn	14805.1	-0.274014	0.00123493
Armc10	1676.03	-0.274502	0.0482273
Mrps9	1479.1	-0.276121	0.00763073
Synj2	1645.38	-0.277246	0.0104629
Letmd1	1317.47	-0.277268	0.0179401
Wdr92	843.144	-0.27753	0.0465523
Slc7a6os	1293.86	-0.278978	0.0222643
Btf3l4	4495.98	-0.280832	0.0111756
Rbl2	2066.66	-0.281202	0.00498968
Brd1	2882.28	-0.281689	0.000355519
Lclat1	2716.89	-0.281828	0.0402859
Vipas39	1504.93	-0.282052	0.0338591
Dock7	10072.5	-0.282331	0.00941445
Wdr5	2950.25	-0.282856	0.0383191
Ppa2	1042.26	-0.28296	0.0399221
Gmps	4740.88	-0.283601	0.0383191
Klhl42	1851.79	-0.284177	0.0146165
Trub2	1464.18	-0.284243	0.0289468
Ibtk	1777.86	-0.285185	0.028302
Pcgf3	3689.92	-0.286068	0.00459046
Rmnd5a	3357.07	-0.286118	0.0379862
Smcr8	3771.34	-0.286836	0.0424597
Clns1a	2100.98	-0.2882	0.0257234
Csnk1g2	5738.74	-0.291456	0.048771
Rundc1	970.325	-0.291635	0.0472609
Nek6	2770.34	-0.292709	0.043194
Xpnpep3	989.099	-0.293275	0.00404644
Camkk2	1761.97	-0.293618	0.0223557
Zc3hav1l	1399.67	-0.293796	0.0109316
Zfp334	1151.13	-0.294952	0.0242121
Tbc1d24	2492.5	-0.295073	0.0280293
Elp2	4679.84	-0.295982	0.0285893
Rnf115	1861.02	-0.29933	0.0269063
Rtf1	2978.28	-0.299518	0.0487358
Ank	9508.85	-0.300261	0.0487358
Timm8b	906.714	-0.300807	0.0120598
Mex3c	2408.71	-0.301178	0.0319673
Tbl1xr1	2044.59	-0.301664	0.0482273
BC048403	738.729	-0.301943	0.0421234
Nhlrc3	2088.13	-0.30427	0.0214965
Egln2	2115.92	-0.304629	0.047279
Tsta3	1507.5	-0.304915	0.0350026
Mrps5	2126.39	-0.305612	0.0123824
Max	2035.94	-0.30569	0.0136301
Jmy	1698.02	-0.307249	0.00452871
Sco1	557.039	-0.307584	0.0209808
Zbtb9	615.739	-0.308175	0.045902
Sart3	2034.69	-0.308207	0.0415758
Usp42	1288.77	-0.308263	0.00379307
Zmiz2	2535.33	-0.309014	0.0228935
Tmem186	774.752	-0.309154	0.0447701
Zfp358	1303.34	-0.310048	0.0311277
Trnau1ap	1335.04	-0.311939	0.0383191
Fam53a	1630.05	-0.312995	0.0395562
Tubgcp2	1519.63	-0.314416	0.0471697
Atxn7l3	3554.49	-0.315787	0.00325038
Zyx	23862	-0.315886	0.0393956
Acap2	6513.12	-0.316544	0.0438789
Fastkd1	692.769	-0.317306	0.0245534
Gigyf2	4619.8	-0.319007	0.000416418
Nono	17185	-0.319128	0.0329538
Eif4a1	28085	-0.321039	0.0147518
Zfp799	721.491	-0.321091	0.016862
Gadd45gip1	1198.86	-0.321315	0.0200737
Rab11fip3	2701.59	-0.321421	0.0033507
Ado	1738.48	-0.324308	0.00462999
Rnf220	2987.61	-0.324813	0.0125917
Prr3	728.918	-0.325461	0.0112736
Slc37a3	2707.71	-0.326015	0.00181146
Srsf9	1778.89	-0.326063	0.00139935
Prmt6	763.814	-0.326171	0.0284697
Vkorc1l1	1525.06	-0.326582	0.000344361
Nsmce2	1712.98	-0.327025	0.029107
Cog3	2017.36	-0.327414	0.0306103
Washc5	9453.02	-0.327717	0.00230432
Sertad2	3856.91	-0.327888	0.016862
Cep170	6223.84	-0.328003	0.0482718
Yeats2	2822.94	-0.329213	0.00258803
Pip5k1c	2979.35	-0.331784	0.0354625
Stx6	2150.49	-0.331897	0.0228633
Gmcl1	1500.2	-0.332556	0.000116551
Polr1a	4966.44	-0.332752	0.044376
Dcun1d5	1542.9	-0.333067	0.0149835
Pcnx	4490.43	-0.333388	0.0133074
Vdac2	9351.95	-0.334102	0.0178288
Cacfd1	1602.51	-0.334225	0.0349391
Smim13	747.324	-0.334641	0.0486393
Mrm3	359.87	-0.334712	0.043116
Tet3	2987.45	-0.334854	0.0448146
Ccar2	1822.78	-0.335176	0.0333591
Hnrnpf	22991.5	-0.335385	0.009202
Mrpl9	1944.26	-0.335712	0.00533193
Armcx2	5543.69	-0.335899	0.00423504
Dnlz	934.932	-0.336271	0.0258786
Amer1	1350.76	-0.336287	0.00048873
Sbf1	5212.74	-0.336692	0.0299878
Actn1	13390.6	-0.336738	0.0185091
Fbxl19	1033.98	-0.33779	0.0294493
Anks3	1314.91	-0.337806	0.0483938
Pou6f1	1919.57	-0.338007	0.018024
Znrf1	2102.51	-0.338636	0.0233144
Surf6	1223.04	-0.339198	0.0115183
Gm7488	1833.11	-0.339841	0.047279
Ccdc22	1040.82	-0.341665	0.0062152
Farp1	7954.26	-0.344994	0.0111739
Mgat5	813.187	-0.345441	0.0472862
Sall2	1033.64	-0.345481	0.0245477
Tcf3	4577.6	-0.345981	0.0137118
Pdzd4	1139.55	-0.346972	0.0287495
Enah	2404.28	-0.347932	0.0317009
Carm1	4057.02	-0.348451	0.00583844
Ttc21b	2440.38	-0.349733	0.000834787
Zbtb5	524.871	-0.350282	0.0468856
Nlgn2	3845.6	-0.351901	0.0494159
Trak1	2002.75	-0.351943	0.0124599
Zbtb12	936.864	-0.352207	0.0127839
Zmynd19	1294.3	-0.352681	0.0496356
Mfsd14a	1911.46	-0.353867	0.0146274
Commd10	1041.84	-0.354429	0.0109816
mt-Nd2	99498.3	-0.354793	0.00731434
Ap5z1	1165.21	-0.354855	0.0155821
Tada2b	1040.97	-0.355217	0.000866236
Khdrbs1	7784.51	-0.355374	0.0127563
Uhrf2	4017.21	-0.355782	0.0355883
Bach1	2273.47	-0.356218	0.000538922
Mpnd	2802.89	-0.35721	0.0450376
Gigyf1	2070.37	-0.358511	0.0180994
Polr2h	1088.85	-0.358588	0.0446686
Bcl10	1391.52	-0.358768	0.0183883
Ehmt1	2812.1	-0.358991	0.000274601
NA	5575.68	-0.359096	0.0284831
Tmem14c	2037.87	-0.359493	0.0295698
Lrpprc	5310.3	-0.359774	0.0306865
Tomm34	1451.33	-0.359981	0.00669607
Eif2ak4	3546.11	-0.359982	0.00230025
Llgl1	4105.61	-0.361371	0.00881939
Nab2	4607.44	-0.361895	0.0299067
Cnbp	12294.5	-0.362049	0.0304578
Fbxl6	1647.64	-0.363285	0.0426647
Zbtb21	1062.93	-0.363539	0.0113788
Spast	2112.32	-0.363642	0.0370253
Set	10211.4	-0.364316	0.0482273
Timm9	538.733	-0.365117	0.0347898
Adam19	3337.63	-0.365481	0.0402154
Cep19	695.465	-0.3656	0.00158792
Gpsm2	2322	-0.365855	0.0467147
Pex5	3893.38	-0.366161	0.00112634
Tmx4	2058.45	-0.366861	0.00285787
Spata7	434.519	-0.366885	0.0075112
Tsc1	3398.46	-0.3671	0.0195917
Wipf1	3029.78	-0.367187	0.000100817
Lmo4	1591.79	-0.368529	0.00109459
Mrpl36	758.717	-0.368757	0.0079835
H1f0	12531.5	-0.368923	0.00754869
Ppm1l	2353.62	-0.369114	0.00567848
Slc4a2	6711.94	-0.369202	0.0484739
Elavl1	3244.2	-0.369851	0.0343289
Fads1	13261.2	-0.372019	0.0125662
Hectd3	2568.61	-0.372117	0.0206391
Prdx2	10872.4	-0.372394	0.0245534
Atic	6279.23	-0.372528	0.047138
Nob1	1945.87	-0.373843	0.0135232
Met	7204.02	-0.374118	0.0155719
Tecr	7238.64	-0.374957	0.032705
Aatf	2596.89	-0.375066	0.00438924
Txlna	4884.05	-0.37559	0.0126275
2310033P09Rik	321.554	-0.375703	0.0355962
Psme2	2209.65	-0.37576	0.00473838
Spin1	3118.16	-0.376024	0.00339686
Rnf34	1154.61	-0.37656	0.00279886
Spry2	928.098	-0.377135	0.0134969
Gas8	1271.18	-0.37736	0.0474521
Zfp655	3110.7	-0.378769	0.000746501
Deaf1	690.634	-0.379195	0.0394994
Ctnnbl1	1369.04	-0.380532	0.0110404
Fadd	424.191	-0.381004	0.0465523
Sipa1	1737.31	-0.381327	0.0389662
Prepl	2110.74	-0.381468	0.000389665
Slc38a7	2944.82	-0.381895	0.0311756
Noa1	980.094	-0.381896	0.0287689
Ywhaz	11408.9	-0.382888	0.00115849
Ebp	1605.35	-0.383059	0.0478866
Plk2	10524.6	-0.38383	0.0448298
Ift43	828.816	-0.383966	0.00163348
Mtfmt	419.594	-0.384561	0.0175411
Diexf	951.286	-0.384581	0.000574876
Dock1	3924.57	-0.386569	0.00427711
Ttc27	1412.86	-0.388133	0.00319388
Nat2	437.499	-0.388221	0.0287321
Ppp1r10	2578.2	-0.388384	0.0270106
Josd2	899.99	-0.388419	0.0149541
Tmem251	678.33	-0.388644	0.0308243
Nrp2	11248.5	-0.3887	0.0252814
Midn	4349.63	-0.388721	0.0395815
Plekha5	1255.59	-0.390034	0.0460612
Fam118a	816.166	-0.390514	0.00416372
Mrps26	1220.38	-0.391357	0.00577517
Rcl1	1451.16	-0.391857	0.0294112
Nol6	2151.23	-0.391953	0.0386002
Mum1	1919.34	-0.392495	0.000574318
Pus7l	363.065	-0.392993	0.0267017
Vim	152127	-0.393081	0.0326408
Mrpl52	1057.21	-0.393479	0.0035556
Mafg	3468.76	-0.393529	0.00127304
Nit2	1118.36	-0.3939	0.0307434
Echs1	2288.27	-0.39496	0.0123745
B4galt2	3537.66	-0.39567	0.0089743
Ralb	3073.45	-0.396826	0.0235696
Cttnbp2nl	3034.3	-0.396888	0.00551519
Usp47	10646.5	-0.397467	0.00164016
Pdgfrb	13123.5	-0.398043	0.012342
Gaa	16101.8	-0.398424	0.0482629
Elf2	3398.18	-0.399319	0.000408571
Fes	449.923	-0.4001	0.0335459
Zcchc14	3410.08	-0.400102	2.1031e-05
Dclre1b	430.498	-0.400234	0.0324457
Magee1	2530.57	-0.401184	0.00482119
Cd34	10535.6	-0.401278	0.0478586
Pip4p2	1878.03	-0.401579	0.00942225
Slc35e3	2219.99	-0.401593	0.0139535
Ctnnd1	14049.6	-0.401632	0.0230426
Naa10	1512.75	-0.402004	0.0290569
Coro1c	5207.16	-0.402052	0.0205493
5031425E22Rik	290.545	-0.403334	0.0291867
Ing2	511.697	-0.404255	0.0394714
Zfp827	2374.03	-0.404974	0.0215131
Cdkn2aip	683.726	-0.405043	0.0144871
Zfp706	4663.74	-0.405187	0.00858307
Rpp38	445.77	-0.405194	0.0345708
Myc	3282.76	-0.40528	0.0417815
Coq6	914.961	-0.405463	0.0478586
Rrp15	1350.95	-0.405544	0.0302761
Zbtb45	334.132	-0.406592	0.0482273
Armc9	957.29	-0.407148	0.000412507
Xrcc1	1307.69	-0.407344	0.0443362
Washc2	10254.8	-0.407427	0.023037
Mob3a	1207.13	-0.408013	0.0406396
Phc1	2184.53	-0.408156	0.020756
Hinfp	406.824	-0.408488	0.0262005
Gpatch2l	1358.91	-0.4089	0.0199441
Rbm4	516.682	-0.409135	0.0344516
Bcl7a	1302.55	-0.409166	0.00314948
Phf23	3785.99	-0.409212	0.0213812
D10Wsu102e	2431.21	-0.40964	0.00281964
Pik3r2	5877.98	-0.410201	0.0135745
Acaca	6220.31	-0.410387	0.0295583
Pcdh18	4140.88	-0.41046	0.0171681
Hnrnpa1	23929.7	-0.411297	0.029588
Sdad1	2442.35	-0.411422	0.00046355
Pdpr	1055.82	-0.411479	0.00159058
Pi4kb	3352.49	-0.411667	0.0133723
Syncrip	5515.5	-0.412488	0.0165493
Itsn1	2752.84	-0.412737	0.00053336
3110082I17Rik	709.111	-0.413504	0.0419908
Lgals1	85771.5	-0.413914	0.0308243
Nkrf	418.561	-0.413974	0.0098629
Stard5	614.993	-0.416505	0.0266257
Inf2	6535.96	-0.416647	0.021208
Stat1	1423.13	-0.416967	0.0308243
Armcx3	3815.42	-0.417018	0.017051
Irx5	374.891	-0.417697	0.0386002
Pabpc1	86856.5	-0.418172	0.0253799
Bola1	299.41	-0.418797	0.0462907
Parp8	1704.66	-0.419086	0.0102337
Maz	5576	-0.419155	0.00325038
Coprs	814.186	-0.419283	0.00195056
Wdr82	3294.64	-0.41938	0.000758588
Irs2	2222.68	-0.420349	0.0247517
Pitrm1	6900.71	-0.420675	0.000413556
Ogdhl	4923.88	-0.421863	0.0118499
Bcl7c	1233.6	-0.423192	0.0247921
Hnrnpa0	3624.46	-0.424447	0.0350517
Ppp1r13b	826.031	-0.424458	0.0167147
Polr1c	2348.16	-0.424898	0.0474057
Hbp1	5566.2	-0.425035	0.0454727
Tiparp	2669.57	-0.425361	0.00818274
Faap100	615.357	-0.426572	0.0416042
Usp28	1013.74	-0.426606	0.000178357
Taf6l	798.761	-0.426761	0.0439178
Kat2a	2700.15	-0.426915	0.0199441
Zfp362	2229.1	-0.427339	0.00207992
Hsdl1	1948.42	-0.427875	0.0102661
Fam136a	1289.21	-0.429132	0.0176474
Capn10	780.818	-0.429569	0.023816
Pip4k2b	4426.45	-0.430006	6.8926e-06
Stxbp1	3426.85	-0.430147	0.0235223
Sox12	1777.46	-0.430375	0.037933
Tax1bp3	4764.28	-0.430608	0.0230099
Impact	6753.39	-0.430621	0.0353732
Btd	882.145	-0.430926	0.0191121
Sema4c	1046.85	-0.431055	0.0157232
Mrpl2	1684.06	-0.433983	0.00822501
Lpar1	5879.93	-0.435073	0.0169484
4930402H24Rik	5341.15	-0.435465	0.000327193
Mpdu1	1210.81	-0.435917	0.00366834
Rbm3	13054.2	-0.436114	0.00741289
Gtf3c5	1178.5	-0.437346	0.000259631
Edc3	1285.87	-0.43804	0.00214392
Ap4m1	644.426	-0.438255	0.0323667
Cic	8307.86	-0.438279	0.0049728
Mrps33	1660.84	-0.440015	0.0179178
Apobec3	1537.87	-0.440208	0.0036564
Usb1	1737.63	-0.441479	0.00216825
NA	1773.33	-0.442543	0.000171461
Rbp1	2005.26	-0.442996	0.0417815
Xrcc5	2169.7	-0.444656	0.000777882
Slc12a7	1768.92	-0.444747	0.00415698
Rpl31	2778.26	-0.444761	0.00248968
Nmnat2	1973.93	-0.44477	0.0391759
Tsr2	1165.01	-0.445256	0.0082362
Fbxo41	890.838	-0.445429	0.0302866
Cbarp	525.044	-0.445457	0.0102731
Gtf2ird1	1929.06	-0.446181	0.000396912
Bcs1l	748.899	-0.446825	0.0299067
Rdh11	2494.14	-0.447532	0.0217241
Orai2	1421	-0.449008	0.00342193
Ick	1414.69	-0.449095	0.000654791
Zfp319	991.938	-0.450235	0.00119475
Tsen2	691.219	-0.450414	0.0107925
Ip6k2	1213.47	-0.450485	0.0253799
Agpat4	1161.53	-0.45054	0.0350026
Gm8186	1195.31	-0.450567	0.0161983
Fam126a	2910.9	-0.450838	2.99473e-05
Samd1	1577.42	-0.450974	0.0201837
Tmed1	963.052	-0.451752	0.0147466
Lta4h	6976.78	-0.452251	0.0204632
Eif3e	15575.4	-0.452836	0.0321943
Mettl27	1096.64	-0.453793	0.0433877
Lrfn4	2023.21	-0.454203	0.00413009
Vmac	1013.47	-0.454408	0.0238494
Atp6v0b	9934.29	-0.454616	0.0416022
Nrg1	1866.44	-0.455197	0.0426146
Zfp202	333.094	-0.456187	0.0086527
Zfp687	1806.06	-0.456507	1.24676e-06
Hdac3	3639.47	-0.456737	0.000898654
Rpl35	28922.3	-0.456779	0.0314047
Pcdhb17	304.615	-0.456793	0.0267017
Ilf2	3066.69	-0.457847	0.00267216
Mccc2	227.101	-0.458488	0.0357454
Ttyh2	1997.97	-0.459072	0.0322086
Tubb2a	6574.06	-0.459534	0.0258206
Ddx54	4300.18	-0.459539	0.0192062
Cog4	4133.2	-0.460025	0.020177
Tle1	1922.89	-0.460056	0.00489815
Wdr46	1834.74	-0.461166	0.0171887
Smad1	1578.22	-0.462855	0.0135651
Zfp142	2034.72	-0.463764	0.00153169
Ints7	1422.71	-0.464111	0.00365931
Soga3	486.85	-0.464148	0.0186342
Anxa6	6987.12	-0.464203	0.0389663
Tmcc2	1387.57	-0.464919	0.0386504
Ppp1r14b	5784.84	-0.465339	0.0401429
Poc1b	1164.78	-0.466749	0.00467643
Ptpn9	2903.92	-0.467136	0.000132175
Nsg1	1730.07	-0.467318	0.00551519
Mmp11	3113.34	-0.467447	0.000633187
Ddx39b	10038.8	-0.468124	0.00514639
Top3a	748.569	-0.468794	0.0266147
Cfap20	1689.54	-0.468984	0.000564438
Usp11	2202.58	-0.469057	0.0455643
Cdk5rap2	4844.5	-0.469078	0.0223043
Cpne8	1083.71	-0.469078	0.000140395
Ptma	34544.2	-0.470052	0.00646923
Mecom	1419.7	-0.470853	0.0208257
Ctnnb1	26831	-0.470992	1.97274e-06
Noct	8107.9	-0.471533	0.000159261
Bcl2l12	332.21	-0.472236	0.0345708
Gm29394	1296.62	-0.473125	0.00189831
Cblb	1328.18	-0.474001	0.00458358
Dock5	2703.99	-0.474002	0.0112544
Rps29	19692	-0.474476	0.0117125
Rufy3	357.841	-0.475518	0.0188705
Rpl8	66813.6	-0.475773	0.028935
Arhgap32	2413.88	-0.476307	0.00104277
Gm4540	805.271	-0.476478	0.0269383
Fnip2	5464.46	-0.47674	0.0198134
Ears2	383.165	-0.477237	0.00764051
[truncated: 633 more rows]

## Sheet: DEgenes_NIH3T3_TFE3_vs_EV
Gene	baseMean	log2 Fold Change	padj
Adamts13	189.315	10.249	0.00432051
Plekhh1	212.237	8.05063	3.2778e-06
Tmem150b	157.485	6.95802	0.00484556
Cyp4f14	11.0506	5.26446	0.00357575
Gm27286	31.9452	5.06094	0.0109157
Tfeb	959.762	4.82749	9.30957e-139
Abcc2	27.6158	4.77784	0.00019583
Gm26749	17.4855	4.46924	0.0233874
Tspan10	235.843	4.45188	0.000248593
Gpr174	13.3352	4.40161	0.00647911
Igfbp5	819.648	3.8582	1.04288e-11
Mep1a	25.5871	3.47847	0.000240044
Kdr	75.9215	3.46828	2.39332e-05
Gpnmb	3590.84	3.20751	2.37971e-25
Mamld1	9.31357	3.12599	0.040659
Dusp15	15.6381	2.73328	0.000132509
Agt	230.417	2.63781	1.34638e-09
Rragd	324.477	2.63001	9.85064e-16
Pmel	43.374	2.59759	4.41549e-18
Mgam	514.757	2.53849	3.97904e-06
Rnf43	74.7715	2.50293	1.65858e-10
Gm10256	43.0094	2.46751	0.00804914
Mreg	281.105	2.41548	8.37378e-09
Ptgds	167.419	2.39573	2.63575e-10
Celsr1	29.5417	2.35299	5.81053e-06
St3gal6	28.199	2.30185	0.024448
Plp1	415.719	2.14006	6.57429e-07
Erbb3	69.4612	2.11078	0.0159622
Tspan12	74.6818	2.00008	2.62015e-05
Kbtbd11	17.4369	1.97855	0.0109157
Rnf128	22.0282	1.94862	0.0384488
Trim63	604.448	1.92812	0.000189751
Rab27a	205.841	1.91279	2.21806e-13
Renbp	533.609	1.89847	9.32347e-22
Hyal1	467.981	1.89781	3.62537e-10
Notch4	22.947	1.89125	0.0246293
Peg3	3145.5	1.88124	3.20777e-18
Aloxe3	163.782	1.87698	2.1988e-06
Dmrtc1c2	1708.16	1.87397	0.0490982
Ccn3	191.591	1.84233	3.07983e-16
Pla2g2e	18.4721	1.74093	0.00132857
Hhatl	22.279	1.72329	0.0126349
Mlana	173.338	1.63152	0.0423338
Optn	361.568	1.6172	1.88678e-21
E330034G19Rik	21.0898	1.58902	0.000418658
Gm17382	35.2997	1.58342	0.000183659
Mx2	49.681	1.58189	0.00559142
Tfe3	4096.62	1.56571	2.23046e-27
Dmxl2	711.167	1.55836	3.26845e-06
Tnfrsf21	266.515	1.55764	1.06277e-10
Gm10010	87.0373	1.5476	2.61009e-05
Garem2	297.72	1.5247	5.21128e-17
Kcnk3	92.2143	1.51258	0.00644866
Selenop	9438.31	1.49236	3.8619e-05
Ttc39a	153.825	1.47601	6.90533e-06
Ccdc40	33.1828	1.45747	0.011175
Ttc39aos1	48.767	1.45583	0.00110372
Vgf	80.4861	1.45434	0.000578638
Nlrc5	42.3917	1.44135	0.0150112
Carmil3	108.312	1.4403	0.000192648
Hsd17b1	30.8224	1.42296	0.00715887
Gm16861	183.476	1.42113	9.19338e-14
Sytl2	158.028	1.37626	0.0129786
Col9a3	88.807	1.3065	5.28273e-06
Itgb3	406.415	1.30435	0.00272295
AA467197	26.5667	1.29546	0.0367141
Atf3	486.708	1.29427	1.91566e-07
2610318N02Rik	78.5731	1.28771	0.0175355
Adgrg1	72.7217	1.25195	0.00324165
Sap30	554.942	1.23509	4.65954e-07
Fbxo32	1611.24	1.22076	9.48023e-06
Fuca2	3318.4	1.20494	1.62836e-11
Lyst	3273.74	1.19908	2.77873e-18
3010001F23Rik	41.8613	1.18815	0.0117676
Ramp3	1853.84	1.18564	0.00237823
Ankrd12	2220.36	1.15177	3.36054e-06
Dusp4	2570.48	1.14523	0.00227232
Bhlhe41	899.549	1.14364	0.000153932
Dpf1	35.9273	1.14045	0.0482404
Pnpla7	844.563	1.13805	8.37378e-09
Adcy1	1520.54	1.13468	0.000482682
C77080	1863.18	1.1295	7.0482e-15
Smad9	231.53	1.12869	0.0104786
Klrg2	65.682	1.1224	0.00723334
Lrguk	36.6591	1.12229	0.0266559
Hebp2	255.395	1.11657	2.44312e-08
2500002B13Rik	80.4231	1.11265	0.000232894
Myo7a	1099.23	1.11212	9.86686e-07
Fnip2	5464.46	1.10537	6.55461e-10
Creg1	2258.35	1.09892	3.83779e-06
Slc25a44	2191.36	1.09838	2.73869e-11
Tcn2	1543.36	1.09104	4.88208e-05
Gabre	296.546	1.08961	0.000351343
Cry1	919.829	1.083	1.45205e-07
Myo5a	10004.3	1.07387	1.86643e-09
Washc2	10254.8	1.06631	3.08061e-12
Mrgpre	112.849	1.06146	0.0103747
Tbc1d2	1016.92	1.0579	0.000132509
Hk2	3039.31	1.05289	3.56073e-10
Gas2l3	1203.19	1.05142	0.00123245
Cndp2	2438.22	1.04748	0.000849116
Dpp7	5371.99	1.0462	2.50781e-06
Elovl4	159.97	1.04553	0.00234424
Gm7008	42.6258	1.04523	0.00356353
Chaf1b	1033.45	1.03757	0.000404044
Lrp12	1151.83	1.03608	2.81888e-16
Mcoln1	2770.65	1.02079	3.50718e-08
Mfsd1	8319.87	1.01371	5.43926e-14
C530008M17Rik	222.326	1.01113	0.0379772
Pappa2	2623.49	1.00369	0.000140975
5031439G07Rik	7244.86	0.990901	1.20683e-07
Gm8615	190.09	0.987076	0.00045973
Naglu	4106.85	0.982817	7.22057e-05
Pxylp1	827.891	0.97301	0.00429615
Tmem268	2601.3	0.966106	0.000114831
Dbp	721.647	0.965686	0.0392063
Akap6	117.142	0.953514	0.0127703
Sirpa	3616.51	0.952589	1.8999e-08
Phlda1	939.969	0.948187	0.00583718
1700003F12Rik	81.4792	0.946149	0.000294001
Macrod2	179.098	0.946094	1.22664e-06
Lrp8	1552.95	0.944421	0.037627
Ctns	2362.56	0.940218	1.5223e-09
Unc13b	378.855	0.938059	0.000694508
Tifa	255.899	0.931722	0.00429615
Apba1	301.824	0.928199	0.00126553
Cfap157	270.246	0.918929	4.9644e-06
Gnpda1	2534.47	0.917909	9.86686e-07
Sulf1	1797.81	0.917773	0.0329935
Shmt1	1266.24	0.914935	4.7157e-06
P2ry2	104.418	0.909297	0.0233874
Mical1	409.283	0.907553	8.99866e-05
Impact	6753.39	0.90223	8.13774e-07
Tmem140	492.409	0.899045	0.0329935
Mfsd11	2064.25	0.897661	1.89825e-07
Stk17b	1172.32	0.883494	4.51062e-05
Wdr62	764.181	0.881171	0.0100774
Ezr	2125.96	0.878986	8.23131e-08
Npc1	3965.69	0.877423	1.41902e-05
Naa80	610.378	0.877423	8.79859e-05
Lamp1	56088.3	0.86865	2.51505e-05
Slc39a8	483.111	0.86831	6.95059e-05
Sord	8476.14	0.859864	0.00879014
Gla	4390.1	0.855493	0.00074284
Eda2r	1123.27	0.843661	0.0138088
Ass1	199.832	0.842016	0.0397057
Atp6v1c1	4552.1	0.841431	1.96379e-07
Bhlhe40	3834.22	0.833814	0.00671421
Wdr81	3346.66	0.833023	1.10659e-05
Etl4	562.1	0.831321	0.0206021
Hacd2	1385.13	0.830121	4.59687e-05
Ang	240.462	0.827521	0.00308508
Pcdh10	140.297	0.827462	0.0249683
Grn	30705.8	0.817805	0.000429436
Enpp2	759.768	0.81753	0.0365392
Vash2	2507.45	0.815157	2.48997e-05
Zfp704	652.349	0.814073	0.0210343
Neu1	2682.13	0.812868	0.00060037
Zc3h8	210.383	0.809627	0.00490701
Hspa12a	126.854	0.805842	0.0257289
Gstp1	12119.6	0.804958	1.67114e-06
Angel1	396.214	0.79985	0.00587609
Zfand2a	2124.77	0.797834	4.30118e-05
Atp6v1h	5874.5	0.796474	3.49843e-07
Aim2	214.759	0.796083	0.0088273
Ctsa	21262.2	0.796012	0.00082002
Slc39a10	3524.38	0.794512	0.014804
Rell1	1320.85	0.794141	2.6118e-06
Fgfbp3	84.8235	0.793183	0.0338525
Abcc4	345.053	0.792661	0.037627
Cpeb2	370.5	0.791556	0.00165809
Opn3	112.064	0.791088	0.00341277
Znrf2	1311.36	0.788523	0.000416891
Trim37	1840.75	0.78836	1.14276e-09
Gm4673	94.5721	0.787911	0.0224243
Rufy3	357.841	0.768525	4.0675e-05
Ung	266.879	0.767935	0.0104786
Atp6v0d1	8071.89	0.765115	0.00289999
Tuba4a	1663.61	0.762544	0.0270046
Smyd3	1007.19	0.757184	0.00234858
Dnase2a	1680.91	0.75177	2.28609e-08
Cerk	1102.59	0.75164	8.60784e-08
Pnpo	218.655	0.744391	0.00288799
Clcn7	3441.41	0.740822	0.000124736
Rnase4	11680.3	0.735894	0.0129786
Maoa	11869.7	0.734495	0.00178052
Washc5	9453.02	0.728594	3.97834e-14
Nudt16l1	1616.99	0.726295	0.000232894
Cutc	134.627	0.722631	0.000913727
Dock4	204.616	0.720888	0.00921766
Fam214a	744.192	0.720732	0.0246458
Snai2	1626.1	0.719371	0.000297993
Bid	1806.51	0.717356	1.16998e-05
Nagpa	1014.53	0.717038	0.000427534
Slc36a1	1573.34	0.716124	1.10659e-05
Hexa	11840.4	0.715834	0.0350223
Gdf11	1582.16	0.715326	0.000493807
Vps18	2476.56	0.71167	0.00429615
Camkk1	480.616	0.710227	0.0187654
Zbed5	182.506	0.707529	0.00446805
Lurap1	310.617	0.707369	1.70638e-05
Ppfia3	146.669	0.705884	0.0381694
Ss18l2	298.595	0.700915	0.000107406
Slc25a33	464.665	0.694861	0.000345674
Fam171b	768.604	0.694103	0.00704143
Slc39a6	3751.1	0.693633	3.72907e-05
Mroh1	6120.31	0.693372	0.000470799
Tceal9	6722.96	0.68516	0.00101273
Pwwp2b	1031.02	0.679452	0.012152
Klhl21	1593.79	0.676237	0.0350223
4632404H12Rik	210.905	0.675929	0.00886383
Ctsb	36468.2	0.674504	0.0135505
Hsd3b7	1224.25	0.66874	0.00801067
Acy1	719.286	0.666968	0.00259045
Hsdl1	1948.42	0.665705	3.41077e-05
Slc29a3	2607.58	0.665618	0.000248593
Uap1l1	10255.9	0.665107	0.0211159
Gaa	16101.8	0.663836	0.000563862
Chrnb2	134.428	0.661873	0.00719361
Pogk	1686.35	0.661831	1.58545e-05
Atp6v0b	9934.29	0.659259	0.00328551
Mapk8ip1	2586.66	0.656421	0.00511308
Gba	4711.11	0.652413	0.000695637
Pikfyve	2011.64	0.652208	0.000153932
Pip4k2c	5308.5	0.650752	0.00421446
Ephx2	595.984	0.65047	0.0100617
Man2b1	3916.82	0.649546	0.00216524
Hectd3	2568.61	0.646383	1.73386e-05
Atp6v1a	10459.4	0.644834	0.00215829
Gns	20094.8	0.644548	0.00224645
Rnf157	1391.36	0.64441	7.48606e-06
Tsc1	3398.46	0.641195	1.34471e-05
6430548M08Rik	814.895	0.64056	0.000351343
Map3k6	224.274	0.640451	0.0199016
Vps8	2880.11	0.639834	0.000695637
Galc	1514.6	0.634727	0.000208184
St6galnac4	1396.81	0.630117	0.00524813
Col4a3bp	1675.62	0.629969	4.34274e-05
Oxct1	16865.7	0.628768	0.00220308
Ptrh1	1785.44	0.628709	0.00461077
Vegfb	3825.6	0.628576	0.00871428
Prkx	992.156	0.627507	0.00224645
Lnx2	610.26	0.626819	0.000913727
Ahcyl2	2542.95	0.623351	0.00938799
Nkain1	814.873	0.623327	0.0038475
Gclc	1433.97	0.621061	0.0137586
Ogdhl	4923.88	0.620886	0.000173085
Acap3	1180.43	0.618185	0.000744352
Plbd2	8599.31	0.61817	0.0051447
Slc20a1	2917.81	0.614839	0.0108138
Vps13c	3424.13	0.613673	0.00178052
Spns1	1815.84	0.613146	0.000236751
Gga2	4453.49	0.611187	0.00291117
Fbxl2	422.339	0.610836	0.0428889
Fv1	303.07	0.610561	0.00577424
Myo6	987.17	0.609302	0.0022639
Nat10	2589.32	0.608808	0.000436042
Mnt	3501.85	0.608475	0.0315259
Specc1	3432.28	0.607286	0.0137532
Ostm1	1935.94	0.60628	0.000490606
Osbpl1a	1582.54	0.605986	0.000189899
Ctsd	41499.8	0.605748	0.0484796
Gramd3	607.109	0.604762	0.00931248
Tmem192	1385.04	0.604338	0.00885354
Rragc	10260	0.602751	0.000941328
Mgst1	1067.81	0.601049	0.047913
Tmem251	678.33	0.599339	0.000500818
Adi1	3350.23	0.596713	0.00355031
Gnptab	4858.63	0.59228	9.02692e-05
Mif	7576.74	0.589111	0.0325206
Ccdc115	665.75	0.588577	0.00288799
Atxn3	1054.95	0.587959	0.0287398
Bax	4107.2	0.582219	0.00605762
Igf2r	15440.5	0.581448	0.00306773
Glmp	7292.41	0.580815	0.00479244
Col12a1	2667.38	0.580803	0.000888698
Hook2	814.672	0.580736	0.00412176
Rmnd1	1544.5	0.579309	0.00968695
Sec11c	466.889	0.578892	0.00167335
Fam160a2	1223.4	0.576517	9.56954e-06
Arfgef2	4840.92	0.575572	0.00113094
Ugp2	4229.53	0.573025	4.34608e-05
Sgpl1	13380.7	0.570824	9.92458e-05
Magi2	526.583	0.568882	0.000131657
Atp6v1d	4059.99	0.564711	0.0125079
Ogdh	6423.12	0.564413	0.002229
Parvb	2285.01	0.561916	0.00367696
Soat1	3693.86	0.56163	6.57429e-07
Slc17a5	1194.71	0.560315	0.0125102
Fnip1	4227.64	0.559794	0.00359932
Cdc14a	289.218	0.558876	0.0150464
Shpk	226.356	0.557204	0.00872523
Cuta	2544.8	0.556936	0.0117826
Pianp	1185.17	0.556869	0.0495645
Akap13	5008.33	0.556237	0.00450023
Ap5z1	1165.21	0.555609	7.82537e-05
Zfyve26	2479.5	0.555575	2.51721e-05
Dhtkd1	505.019	0.553293	0.00323423
Tmem199	785.075	0.551933	1.37657e-05
Diaph2	713.884	0.550201	0.0356927
Ccdc171	404.936	0.548555	0.0192951
Gtf2h1	3210.85	0.54664	0.00323447
Kif16b	1057.72	0.545675	0.000208184
Wdr7	1610.4	0.542079	0.000132509
Tmem150a	1636.62	0.541468	0.00955472
Commd4	942.146	0.540663	0.000351343
Sbno1	4742.8	0.540132	0.00344368
Rai14	4032.08	0.537907	0.0135808
Itpr3	5436.34	0.536597	0.00425849
Mrs2	469.061	0.534015	0.0128424
Plpbp	2115.6	0.53119	9.61158e-12
Mgat4b	6635.71	0.531074	0.0228821
Nln	2979.6	0.530578	2.48997e-05
Nr2c2ap	954.218	0.52931	0.0382896
Prkdc	1324.77	0.52605	0.00370866
Nars2	357.798	0.524997	0.00563148
Fam50a	3368.13	0.524884	0.00202693
Gnl3	3183.6	0.522765	0.0249803
Vps33a	2892.01	0.522696	4.09388e-07
Fndc10	367.932	0.520683	0.047607
Dcun1d4	1164.46	0.518121	0.0287544
Tpp1	8880.77	0.517482	0.0186287
Htt	2803.66	0.514465	0.000321634
Txnrd3	885.446	0.514436	0.0079195
Plpp2	931.329	0.514137	0.0212342
Snx8	2047.56	0.511004	0.00267298
Slc35f6	2258.27	0.509732	0.0074596
Rdh13	1335.03	0.508858	0.0029626
2019-03-08	6434.71	0.505103	2.33334e-25
Serac1	662.409	0.504527	0.0114559
AI413582	932.471	0.504477	0.0433917
Orai2	1421	0.502362	0.00220825
mt-Nd6	36849	0.500379	0.00945113
Pno1	1764.16	0.499157	0.0399079
Scpep1	18619.7	0.495791	0.00443796
Tmem87b	2010.23	0.495284	0.0329935
Armcx6	583.59	0.495083	0.0230936
Cd3eap	705.052	0.49373	0.047913
Cln5	1783.71	0.490249	0.0122644
Flt1	1329.71	0.490045	0.00216524
Tmeff1	2004.06	0.489167	0.00575944
Pnpla6	1143.85	0.487785	0.000364727
Snx30	5144.86	0.487696	0.00636614
Ank2	3380.14	0.484745	0.037627
Slc20a2	2786.73	0.48471	0.0152412
Lrpprc	5310.3	0.484237	0.00469318
Scarb2	3430.45	0.483704	0.00967276
Nr6a1	421.218	0.483653	0.018975
Tbc1d16	1866.94	0.482479	0.00940529
Zfp655	3110.7	0.481461	2.51721e-05
mt-Nd5	120858	0.47638	0.00743188
Bcas3	993.416	0.471435	0.0244986
Lta4h	6976.78	0.46979	0.0362271
Foxn2	1053.3	0.465703	0.0267815
Fbxw7	724.764	0.46486	0.0456934
Rnf115	1861.02	0.463813	0.000366625
Clcn5	3296.84	0.462738	1.87716e-07
Nepro	974.788	0.46189	0.0253651
Phf20	3151.25	0.46013	1.40112e-05
Tctn3	629.411	0.459696	0.000913727
Elf2	3398.18	0.459647	9.73698e-05
Vac14	1852.54	0.457451	0.0313305
Kmt2c	2822.83	0.456758	0.0072583
Vps26a	5958.59	0.452398	0.00312884
Tbc1d24	2492.5	0.445935	0.000675586
Atg3	1744.11	0.4453	0.00259045
Nsmce2	1712.98	0.443314	0.00359574
2410131K14Rik	1774.51	0.442788	0.00302774
Atg7	2072.14	0.442426	0.0404982
Abhd12	3305.45	0.441359	0.0230936
Paxip1	2358.46	0.440842	0.0109355
Slc26a2	908.018	0.440485	0.00545094
Hnrnph2	3745.44	0.438333	0.0173148
Slc25a15	757.373	0.43547	0.00302774
Coprs	814.186	0.434274	0.00302774
Nup50	3476.73	0.43415	0.0329935
Bex3	8754.03	0.433051	0.00657258
Wdr12	1978.77	0.429597	0.0435171
Cstb	9856.09	0.425593	0.00542518
Utp18	1810.57	0.424762	0.0419541
Hivep1	1746.58	0.42462	0.00075144
Celf1	4225.59	0.424102	0.034903
Ccdc93	3957.53	0.423445	0.0203964
Adamtsl5	3366.85	0.421616	0.0114568
Jak1	13668.7	0.421332	0.0206591
Lrp11	3762.57	0.418649	0.0270046
Degs1	9219.28	0.418455	0.036522
Zfand5	4632.45	0.417807	0.0374469
Als2	1499.84	0.414846	0.00598062
Irak1bp1	511.688	0.413418	0.036522
Nckap1	11777.1	0.412592	0.023069
Ift88	627.085	0.412085	0.0464135
Kdm4c	2657.63	0.41175	0.017173
2019-09-08	10704.7	0.410181	0.00786764
Bcl7a	1302.55	0.410066	0.00751717
Rab43	2992.19	0.408858	0.0213794
Pcyt1a	4562.39	0.408083	0.000210099
Atp6ap2	4358.09	0.406215	0.045584
Mtrr	953.952	0.404072	0.021783
Asxl2	1701.6	0.402724	0.0163483
Nup188	4987.88	0.400557	0.0235933
Max	2035.94	0.400396	0.00161166
Ube2q1	5225.36	0.399833	0.00060081
Hps3	1032.07	0.398517	0.0136856
Tmem181a	524.561	0.397597	0.00220825
Dolk	812.965	0.396621	0.00955472
Parp8	1704.66	0.393326	0.0415685
Pusl1	543.021	0.391702	0.0326481
Dnajc13	5378.58	0.385782	0.0414741
Golgb1	5482.12	0.385621	0.0187046
Rab3gap2	4136.32	0.385483	0.00397652
Dzip1	1896.61	0.385042	0.00302774
Rhoq	7241.96	0.383865	0.0114559
Ppp1r37	2197.92	0.383724	0.0482404
Lrfn4	2023.21	0.382949	0.0482027
Tulp4	16880	0.379754	0.00645428
Zfp28	611.041	0.379682	0.0179305
mt-Nd2	99498.3	0.379245	0.00970103
Aak1	1915.97	0.378765	0.010556
Agfg1	2748.19	0.377343	0.00168983
Uggt1	8254.06	0.377079	0.00569323
Rcbtb1	2189.38	0.376051	0.0219903
mt-Co2	249818	0.375801	0.00982183
Focad	3203.35	0.373466	0.0103621
Gid4	1936.27	0.370285	0.00715012
Agtrap	1417.4	0.364531	0.0314203
Atp7a	1656.52	0.362742	0.0453277
Tceal8	3073.45	0.361602	0.00509776
Akap10	1520.8	0.360886	8.90087e-05
Mtch2	7896.97	0.358531	0.000219407
Taok3	2501.87	0.354876	0.00462898
Gpr89	1644.68	0.354319	0.0149164
Rsad1	456.032	0.352879	0.0322642
Usp28	1013.74	0.350896	0.00743188
Tmed8	1367.15	0.34729	0.0201843
Smcr8	3771.34	0.3443	0.0246911
Pi4ka	5631.27	0.342719	0.00806138
Mycbp2	4214.14	0.342219	0.0197644
D6Wsu163e	991.324	0.341019	0.0102522
Noct	8107.9	0.339244	0.0301721
Nhlrc3	2088.13	0.338222	0.0203877
Pdpr	1055.82	0.33611	0.0329935
Timm8b	906.714	0.335727	0.00885354
Fbxl17	1422.49	0.334234	0.0233416
Anapc1	10971.1	0.329289	0.00871428
Kif3b	2552.9	0.322582	9.686e-05
Cipc	1168.35	0.322507	0.0338312
2610301B20Rik	1235.42	0.320482	0.018929
Nf2	4991.38	0.319746	0.0483193
Spg11	3357.71	0.318995	0.00516431
Bach1	2273.47	0.317936	0.00710069
Pitrm1	6900.71	0.314491	0.0346209
Huwe1	19835	0.311547	0.00872523
Ncoa3	2075.84	0.311492	0.0350223
Micall1	3562.67	0.310768	0.0465553
Kif1b	4905.83	0.306751	0.0358317
Slc38a1	5119.47	0.306561	0.00955472
Sfxn1	2367.25	0.305006	0.00624124
Prepl	2110.74	0.302899	0.0185329
Mafg	3468.76	0.302765	0.047913
Tbcel	1611.7	0.29646	0.00949854
Acadl	4515.65	0.291974	0.0350223
Dnajc11	1545.72	0.291634	0.0213794
Ago2	7856.33	0.289278	0.0405738
Tmem126b	728.036	0.278294	0.036635
Pacs2	7227	0.274974	0.0350223
Zfp652	3085.87	0.269912	0.0437019
Nop14	3249.95	0.254444	0.0151051
Ankrd13a	3982.56	0.235366	0.0435171
Zfp106	11251.1	0.228926	0.0129786
Btbd7	2855.62	0.226549	0.00406918
Cltc	24544.1	0.224904	0.00429615
Tgfbrap1	1916.49	0.218408	0.047607
Kctd3	1744.74	-0.191657	0.0431382
Marveld1	6344.79	-0.256786	0.0235447
Wwtr1	5195.54	-0.256954	0.016738
Ugdh	6304.04	-0.292473	0.0440131
Man2a1	13475	-0.29628	0.0296992
Cd9	9138.52	-0.298432	0.0442338
Wipf1	3029.78	-0.303553	0.00604651
Fyn	3259.62	-0.306521	0.0261525
Zbed3	1298.09	-0.315102	0.000191642
Smim11	611.447	-0.315589	0.0324873
Dnmbp	2254.51	-0.320186	0.00955472
Hdac7	6665.61	-0.326595	0.0022639
Myl6	22034.8	-0.328533	0.000695637
Farp1	7954.26	-0.329769	0.0404116
St3gal2	8902.02	-0.329849	0.0197644
Comt	3881.09	-0.331314	0.0268951
Calu	43535	-0.347234	0.0455822
Atf4	16684.1	-0.351057	0.0377054
Sh3gl1	4195.01	-0.352367	0.037627
Cpne1	5044.13	-0.354109	0.000226545
Tpm1	28225.3	-0.354773	0.0308543
Gypc	1383.77	-0.356168	0.0460766
E2f4	3205.64	-0.362522	0.0136856
Emp2	4062.73	-0.36411	0.00255117
Tmem63a	1994.57	-0.365964	0.0184145
Nfix	9711.49	-0.368979	0.0464135
Parva	10879.8	-0.372858	0.0104499
Scd2	61452.8	-0.382106	0.016106
Gtf3c5	1178.5	-0.383093	0.00559232
Fbxl14	1290.48	-0.384916	0.0284208
Synj2	1645.38	-0.389421	0.000351343
Rab3ip	2085.05	-0.395621	0.0477112
Lmo4	1591.79	-0.396337	0.00120175
Foxd2os	411.513	-0.39823	0.0467952
Gsap	597.175	-0.398901	0.0464381
Dnajc24	378.385	-0.399227	0.0356939
Adamts10	953.872	-0.40142	0.0212687
Ehd2	12732.3	-0.406721	0.0129786
Trim8	1911.48	-0.409593	0.00322081
Il17rc	2513.62	-0.409672	0.000219407
Cpne8	1083.71	-0.416413	0.00302774
Tnfsf12	1683.3	-0.41776	0.0354427
Trio	8424.77	-0.418824	0.0430817
Tram2	3451.19	-0.419107	0.00131471
Dynlt1b	1798.34	-0.419235	0.00644866
Rbpj	6189.69	-0.421345	0.00429615
Ajuba	2948.79	-0.422076	0.0468337
Rbpj-ps3	2159.93	-0.422505	0.00533503
Mab21l1	801.04	-0.423195	0.049836
Ctso	1002.43	-0.427816	0.0471114
Tpst1	2809.18	-0.42945	0.0387351
Fam3c	4044.64	-0.430007	0.0192283
Tns2	5211.11	-0.430212	0.03223
Slc6a9	2482.06	-0.430936	0.0257023
Tspo	2413.33	-0.435955	0.00538651
Fuz	552.498	-0.436855	0.0370952
Jdp2	2313.38	-0.437217	0.0243931
Parp12	537.14	-0.438868	0.0159622
Man1c1	553.327	-0.440015	0.0468337
Pcdh18	4140.88	-0.440028	0.0231672
Ext1	3885.77	-0.440473	0.0172425
Cplx2	1224.28	-0.44679	0.0122231
Cavin1	29736.2	-0.447755	0.021603
Sbno2	2509.39	-0.447965	0.0435478
Rgs10	422.067	-0.45365	0.0428889
Ebp	1605.35	-0.458924	0.0313027
Osbpl3	2074.06	-0.464939	0.0309092
Tecr	7238.64	-0.467895	0.0122644
Acadvl	2866.06	-0.467898	0.00885354
Anxa2	27933.3	-0.468794	0.0457795
Epb41l2	9926.27	-0.469564	0.000913727
Efemp1	43132.4	-0.469927	0.0449347
Sqor	2866.17	-0.476509	0.00414707
Tgfbr3	8535.56	-0.477651	0.018929
Peli2	1908.88	-0.480979	0.0055921
Acly	18875.7	-0.483312	0.0300727
Fads2	5458.47	-0.486326	0.00324165
9930012K11Rik	537.673	-0.488727	0.047913
Cask	3506.67	-0.488755	0.00688622
Mcc	1935.55	-0.490156	0.00955472
Alkbh7	365.089	-0.49096	0.00798191
Scd1	8875.78	-0.494441	0.00425849
Rnf150	1744.58	-0.495584	0.0451571
Csad	1257.89	-0.501043	0.0186287
Rasa4	4237.67	-0.505574	0.0410503
Cog4	4133.2	-0.507497	0.0213794
Atf5	11430.6	-0.512187	0.00715012
Mars	4381.01	-0.517472	0.0354427
Nfkb2	5751.41	-0.518522	0.0359815
Synpo	5453.72	-0.519289	0.0492359
Lpar1	5879.93	-0.519491	0.00794252
Fez1	805.268	-0.520409	0.0246458
Tbx18	1240.53	-0.520804	3.36054e-06
Fhl2	3219.08	-0.524402	0.0147004
Papss2	2566.38	-0.527857	0.0132448
Gsdmd	431.267	-0.528819	0.00105695
Gpr176	2045.39	-0.538512	0.00761289
Il1rap	2529.83	-0.539156	0.0316388
Lurap1l	1882.94	-0.539592	0.0129458
Trp53i13	637.871	-0.53984	0.0329935
Rufy1	2070.82	-0.54533	0.029449
Tdrkh	618.162	-0.545914	0.0186035
Noc4l	1562.45	-0.546029	0.0072583
Runx1	1094.06	-0.548619	4.34608e-05
Il4ra	1231.92	-0.550111	0.0170094
Shb	889.408	-0.550345	0.00201762
Sertad1	765.388	-0.552179	0.0270046
Nol7	912.346	-0.552768	0.0136869
E430018J23Rik	232.9	-0.557452	0.0203957
Mmp11	3113.34	-0.559891	8.79859e-05
Pced1b	224.748	-0.562026	0.00572346
Plekha1	3449.24	-0.569809	0.00474323
Ccdc9b	3998.15	-0.570497	0.000315805
Ifi35	678.757	-0.574982	0.0190206
Itga2b	570.237	-0.575644	0.0354427
Srebf2	11304.8	-0.576993	0.00277652
Tgfb3	3717.22	-0.584311	0.0253651
Cdc42ep2	2880.64	-0.589507	0.00865331
Foxc1	342.306	-0.591264	0.00534572
Tmem119	3163.06	-0.594279	0.035162
Frmd6	6537.82	-0.594519	0.00167335
Tgfbr2	6135.16	-0.595062	0.0123027
Cavin3	2957.83	-0.595262	0.0157903
Abcd2	730.852	-0.595539	0.0435171
Htra1	323.733	-0.595579	0.0118911
Rpl35a	516.715	-0.597865	0.040669
Vangl1	1595.13	-0.609044	0.0170094
Pdlim2	3693.38	-0.613291	0.0361177
Tmem62	479.903	-0.617	0.0103987
Spry2	928.098	-0.618845	2.54486e-05
Sdc4	3683.17	-0.62142	0.00189908
Rnaseh2c	449.848	-0.621688	0.0127437
Erg28	1761.04	-0.622755	0.0228979
Trp53cor1	155.845	-0.624144	0.0492359
Tm4sf1	4004.71	-0.636453	0.0115342
Il1r1	1964.7	-0.638617	0.029449
Npnt	449.344	-0.640352	0.0124374
Pygo2	2490.29	-0.640601	1.20683e-07
Irs1	2008.22	-0.642208	0.018796
Medag	7575.22	-0.645537	0.0431382
Fhl3	1894.25	-0.64697	0.00302774
Mettl26	461.256	-0.650327	0.0236123
Plpp1	5028.84	-0.652797	0.0073338
Myc	3282.76	-0.652926	0.000709338
Igfbp6	10099.9	-0.654821	0.0129786
Arhgap28	1085.41	-0.66098	0.00715012
Lmo7	1891.86	-0.662574	0.000232894
Plpp5	772.267	-0.662932	0.00105581
Lhx9	259.943	-0.664269	0.0270046
Adamts4	1372.94	-0.66877	0.0412724
Cdc42ep5	621.059	-0.668881	0.0250127
Tspan11	2916.15	-0.675488	0.0079195
Tiam2	1483.53	-0.676381	0.0484796
Jund	2487.54	-0.677876	0.0122231
Nuak1	2656.8	-0.692295	0.00131471
Enpp1	302.983	-0.692371	0.0433267
Ror2	442.146	-0.692585	0.00906517
Map3k14	972.115	-0.693175	0.00414707
Olfml3	3715.9	-0.696177	0.000837921
Gas2	879.719	-0.696183	0.037627
Kcnk2	223.851	-0.700544	0.0358317
Rgs3	1513.57	-0.701975	0.0170094
Plk2	10524.6	-0.703967	7.31591e-05
Hspa1a	228.634	-0.704846	0.0192951
Galnt17	1070.27	-0.710147	0.00138478
Ablim1	3555.85	-0.712035	0.0131038
Fzd2	5450.7	-0.712767	2.88798e-05
Isg20	692.621	-0.713011	0.0198058
Trib2	1232.91	-0.713958	0.00618928
Pcyt1b	608.163	-0.718521	0.0431382
Timp3	19304	-0.720625	0.0158265
Hspa1b	1228.88	-0.729915	1.28629e-05
Gng2	472.989	-0.732305	0.0121029
Clip4	144.43	-0.732885	0.0318527
Mvk	1649.65	-0.733749	0.0313448
Klc3	265.353	-0.737301	0.0128424
Pcdh19	2133.01	-0.743232	0.00284676
Fam43a	1435.29	-0.763996	0.000239502
Arntl	722.482	-0.771825	2.6118e-06
Lrig1	3532.65	-0.778341	0.000171623
Ngf	909.539	-0.783282	0.0123801
Gm11816	245.277	-0.784898	0.0403534
Inka1	187.779	-0.800197	0.0132771
Ldlr	7632.96	-0.802692	0.0231672
Il13ra1	219.047	-0.819218	5.31057e-05
Itgb5	5005.64	-0.820599	0.000482682
Angptl6	251.31	-0.826088	0.0399079
Hmgcr	4300.91	-0.828816	0.0493231
Gpr85	486.545	-0.831174	0.00170916
Grem2	1174.53	-0.832585	0.0189902
H2-T23	367.107	-0.836883	0.0246458
Amigo2	624.692	-0.837276	8.93232e-07
Klf4	2396	-0.842622	0.000315805
Cx3cl1	722.211	-0.845047	0.00811329
Gm45713	119.869	-0.845904	0.00355031
Kcna4	440.106	-0.855739	0.0128424
Mn1	1568.86	-0.859365	0.000631017
Cercam	171.237	-0.860905	0.0138088
Lbh	5291.65	-0.864108	0.0287544
Podnl1	3817.28	-0.86575	9.48023e-06
Nfil3	1259.06	-0.86617	0.000956026
Hexdc	950.816	-0.873223	3.2778e-06
Cyp51	10822.3	-0.873581	0.0192375
Fdft1	6536.74	-0.874215	0.00931248
Nsdhl	4567.87	-0.879858	0.0175967
Itgbl1	4703.42	-0.885847	0.0289078
Csrp2	1603.4	-0.88641	0.0379772
Gbp2	472.494	-0.888849	0.000913727
Gpr63	64.546	-0.902434	0.021783
S1pr3	3918.19	-0.904576	3.45816e-07
Kank3	220.094	-0.905275	0.0204327
Olfml2b	2018.26	-0.910879	0.00375144
Lsp1	852.155	-0.913239	0.000153335
Adm	2177.28	-0.935004	0.0101217
Fosl1	1007.4	-0.956994	0.0329935
Gm13056	41.4265	-0.959051	0.0310417
Rgs16	180.081	-0.967254	0.049836
Dhcr24	6989.87	-0.976916	0.0246293
Ecm1	1410.01	-0.989877	0.0136856
Pmvk	936.203	-1.00353	0.000888698
Acy3	101.983	-1.01328	0.0201843
NA	84.0996	-1.01813	0.0171606
Fdps	10188	-1.01905	0.0192951
Ccdc141	352.393	-1.02167	0.00631918
Ccl7	1521.62	-1.03259	0.00185162
AW551984	1346.71	-1.04434	0.0200334
Fbln5	11686	-1.05564	5.5599e-07
Tm7sf2	703.38	-1.07809	0.00082002
Col5a3	679.716	-1.08207	0.0103987
Phex	174.47	-1.09007	0.0230572
Cdsn	1502.66	-1.09025	0.000316113
Neurl1a	101.678	-1.09386	0.0136329
Gprc5a	2003.57	-1.10149	0.00511425
Xpnpep2	463.223	-1.10157	0.0022639
Il34	440.881	-1.11706	0.000123475
Osr2	352.692	-1.14269	0.0194289
Chrnb1	351.149	-1.1502	0.0115511
Ifi27l2a	63.9926	-1.15252	0.0108138
Clu	185.671	-1.16993	0.0100606
Tnfaip8l1	90.3199	-1.20172	0.0190206
Hap1	31.386	-1.20764	0.0231672
Gm15280	482.243	-1.25291	1.45205e-07
H2-K2	70.2593	-1.28831	0.00210659
Gm17057	15.8782	-1.3173	0.0457528
Ifi47	69.2341	-1.32784	0.000141192
Tek	47.7847	-1.36954	0.0451565
Ccl2	2277.44	-1.37939	0.00102466
Fam19a1	75.2999	-1.41711	0.0340091
Depp1	214.697	-1.4468	0.00713429
Angptl4	1038.17	-1.45074	2.6118e-06
Cd55	298.581	-1.47253	0.0261016
Gm15710	93.558	-1.48185	0.00074284
Cfap161	19.8324	-1.5406	0.0286169
Crabp1	530.683	-1.57138	3.83779e-06
Ngef	111.946	-1.59007	0.0430817
Serpina3g	65.5042	-1.60793	0.0313448
Krt87	33.7743	-1.63971	0.0375972
Gfra2	25.3859	-1.78933	0.0203565
Cpa4	91.4893	-1.96891	0.023069
Cytip	32.0779	-1.98922	0.0309092
Sorcs2	114.366	-1.99165	1.10659e-05
Nes	211.71	-2.09812	0.045584
Serpina3h	32.6238	-2.14821	0.0102522
Aqp1	1103.31	-2.35277	0.000141192
Msln	8968.24	-2.42945	0.00153852
Rhbdl2	8.37355	-2.79022	0.0458971
Palm3	21.3394	-3.05088	0.00955472
Serpina3i	55.9035	-3.13674	6.11495e-05
Lamc3	81.7366	-3.53607	0.0441025
Nr1i3	116.726	-4.19759	0.0483193
Fgf21	49.4827	-4.51089	0.0384488
Sla2	584.631	-9.71515	1.69234e-07
NA	19.9543	-24.2127	4.30118e-05

## Sheet: DEgenes_NIH3T3_TAZ4SA_vs_EV
Gene	baseMean	log2 Fold Change	padj
Vip	761.406	14.8504	1.21969e-28
Slc6a12	232.627	12.0377	2.08929e-21
Il31ra	119.783	11.856	1.31685e-20
Upk1b	1749.01	11.1738	1.15674e-15
Anxa8	232.838	11.0619	6.75851e-18
Ccl20	50.886	10.7456	2.62974e-15
Arhgap36	36.0143	10.6067	0.00496367
Panx3	37.5769	10.518	7.12051e-15
Hapln1	63.3439	10.4574	2.14078e-10
Slc2a12	153.088	10.4263	6.96718e-05
4933402E13Rik	48.2596	10.2321	2.11432e-15
Parm1	50.6274	9.82814	4.75871e-14
Gm15056	33.5746	9.81276	0.00399697
Sntg1	26.6545	9.48956	4.89914e-13
Cnfn	24.0948	9.2067	2.09909e-11
H2-Aa	11.9577	8.99975	0.0284595
Gm5812	53.478	8.75585	0.000287428
Serping1	32.7794	8.6749	2.05543e-11
Wnt7a	83.295	8.66817	3.21818e-11
Vill	20.0197	8.66562	3.19518e-10
Wnt7b	75.6654	8.43268	3.65855e-10
Robo3	32.484	8.36316	1.02901e-08
Pkhd1	14.1614	8.34852	5.61416e-06
Dppa4	15.3659	8.34511	6.41331e-09
Serpinb9g	65.5698	8.31993	1.03828e-10
Gm27286	31.9452	8.26714	2.02029e-08
Csmd1	7.47178	8.21086	3.07121e-07
Limch1	706.477	8.05476	5.25594e-74
Cdh15	124.665	7.99296	1.25373e-09
Slc47a1	16.3281	7.97843	2.53832e-08
Oprk1	32.0318	7.97643	3.22262e-10
Ddx4	6.74895	7.95308	6.04251e-06
Ces2e	38.3663	7.83675	8.22826e-12
Ptprq	158.596	7.82794	1.53854e-38
Lamb3	47.9384	7.74655	8.82299e-09
U90926	10.0577	7.73936	2.92506e-06
1700012B07Rik	12.4703	7.69439	2.84774e-08
Gdf15	40.7717	7.68042	3.90332e-11
Cntn2	22.2163	7.55995	1.77302e-12
Hist1h4n	13.899	7.55496	1.30544e-07
Scel	35.5646	7.48558	7.01699e-07
Gm9428	14.619	7.3917	8.80609e-08
Sorbs2	490.771	7.33838	3.36074e-91
Serpinb1a	435.17	7.30238	3.14864e-62
AU021092	16.8814	7.28489	1.7013e-07
Snx20	7.50168	7.27276	1.36542e-05
Map3k7cl	13.8284	7.23041	3.50902e-08
Hepacam	5.66674	7.20044	1.89854e-05
Serpinb1c	17.2023	7.15943	8.72976e-07
Serpinb9e	15.7512	7.14759	2.67228e-07
Dsp	6.3802	7.12899	0.00019946
Snca	7.3962	7.09123	5.93863e-05
Hephl1	25.6022	7.06868	5.59128e-07
Gm12153	16.7324	7.01015	2.05295e-07
1520401A03Rik	8.11418	6.9943	1.42946e-05
Prg2	8.09846	6.95705	7.15122e-06
Jph2	553.318	6.94606	5.522e-52
Kdr	75.9215	6.93352	3.11733e-25
Arg1	5.52335	6.89442	5.89493e-06
Cblc	13.395	6.87613	2.98824e-06
NA	188.127	6.83435	3.06388e-28
Gvin1	17.1401	6.79451	5.6973e-05
Speer3	6.08558	6.77838	6.25717e-05
Sh3tc1	213.073	6.77634	2.11963e-19
Cacna1s	6.26984	6.75393	0.00122339
Synpr	13.6668	6.74357	2.12898e-06
Tmem171	242.282	6.71849	5.50896e-14
Btn2a2	21.6726	6.66973	1.34139e-08
B230206L02Rik	12.4341	6.63294	6.18899e-06
Birc7	495.598	6.63213	1.14678e-36
Cyp3a13	57.5751	6.61395	2.97114e-17
1700009N14Rik	112.449	6.60854	3.7203e-23
Gm21293	16.493	6.5817	1.69472e-05
Ces2f	8.0356	6.57881	1.28584e-05
Ikzf4	76.1794	6.52301	3.78636e-13
Gm4070	36.8662	6.52188	5.12538e-09
Gm5286	7.53189	6.50231	5.58645e-06
Des	60.7591	6.48855	4.90537e-25
NA	26.0631	6.44916	5.7593e-06
Plekhs1	102.302	6.42943	3.27549e-34
Ctnnd2	13.329	6.39894	4.73144e-06
Fgfbp1	21.3966	6.39477	1.37594e-09
Serpinb6b	303.433	6.38857	2.40561e-89
Gm6650	24.4531	6.37644	1.02153e-14
Vmn1r44	18.9788	6.33258	3.06652e-06
Fcna	17.1669	6.26418	7.58827e-07
Nkain4	34.4227	6.23503	1.69641e-09
Cyp4f40	16.7882	6.19814	2.34811e-07
Mogat2	37.4973	6.1981	5.06864e-17
Ankk1	13.3364	6.18021	1.35921e-05
Crct1	218.199	6.16011	4.08929e-06
Upk3b	18.3839	6.12351	2.02415e-07
Psme2b	18.2671	6.11638	3.61194e-06
Ube4bos1	31.3665	6.10293	0.0074497
NA	240.539	6.09548	0.00339324
4933427D06Rik	13.6444	6.0883	1.60197e-06
Gm26635	8.22307	6.05604	0.0125881
Arhgap9	58.2115	6.02669	4.41058e-12
Hist1h2br	20.3653	6.02314	3.9316e-06
Serpinb9f	8.68143	6.02313	0.000309758
Fmo2	37.1448	5.98927	6.67138e-18
Cobl	32.6394	5.98869	6.49794e-13
Sbk3	20.1066	5.93711	2.73984e-10
Vtn	30.2387	5.92688	6.80404e-11
Inpp5d	43.7488	5.92391	7.60904e-10
Slamf9	31.6721	5.90226	1.31598e-12
Dpp4	5.2659	5.86846	0.000183248
Tcp11x2	18.4497	5.82985	5.61466e-12
Serpina5	6.80192	5.80712	0.000244854
Serpinb9c	5.60867	5.78476	0.000657058
Serpinb9b	3482.51	5.77662	1.61813e-53
Atg9b	216.608	5.74252	5.77812e-27
Gm10696	6.66762	5.70612	0.000413741
Doc2a	128.94	5.68003	0.0450707
Upk3bl	49.5526	5.65073	3.0853e-12
Susd2	15.1337	5.62892	5.75786e-09
Gli1	5.47793	5.61634	0.000216915
Gm15854	18.2366	5.60631	6.57926e-06
Tmeff2	105.296	5.60266	6.13379e-32
Col4a4	11.5651	5.58965	0.000163061
B3gnt3	5.75918	5.51781	0.000593991
Gpc2	10.6703	5.50809	0.00260191
Als2cl	101.828	5.47896	1.33037e-10
Trav13-2	8.53747	5.44025	0.000323216
Card10	5.87499	5.4383	0.000301852
Sh3rf2	283.663	5.4164	2.54623e-31
Ablim3	364.565	5.41134	1.92616e-52
Ttll9	5.37735	5.4099	0.000885186
Msln	8968.24	5.39315	5.7596e-20
Wdfy4	18.0942	5.37099	0.000107202
Gal3st2	33.3969	5.36	0.000388935
Acta1	8.40078	5.33499	7.50433e-06
Epn3	33.3138	5.33164	1.23866e-07
Myom2	1179.53	5.33114	1.35319e-45
Dnaic1	8.46166	5.28471	0.00219074
Pdzd2	406.351	5.27177	1.51862e-16
Dppa2	32.6822	5.2628	5.06921e-17
Got1l1	8.44042	5.25806	0.000846292
Vnn1	94.9677	5.24823	3.07047e-09
Gm11351	79.4254	5.20936	7.56104e-37
Cyp2ab1	5.55444	5.20096	0.000667738
Olfr456	23.6615	5.1693	2.33675e-11
Lama5	488.289	5.15388	3.13451e-20
Foxa3	6.49281	5.1502	0.000598146
Slc2a3	86.4905	5.13438	1.36722e-14
Psca	64.9212	5.01464	0.000410973
Fmnl1	6.07609	5.01451	0.00457424
Adgrl4	5.88532	5.01295	0.000636726
Sgce	5.71942	4.99274	0.00113439
Misp	6.78213	4.9813	0.000556766
Gm25043	5.79462	4.96512	0.0030326
2900026A02Rik	18.9707	4.95295	3.66895e-11
Klra4	79.2878	4.95274	3.6097e-14
Inhba	546.698	4.9459	1.96676e-18
Tnnt3	106.612	4.94081	4.91574e-11
Mmp16	66.211	4.93805	1.11806e-35
Siglecg	4363.02	4.93744	1.70084e-91
Slc30a2	5.64036	4.92593	0.000842528
Car6	110.811	4.92144	2.38303e-14
Pmaip1	85.1552	4.9182	1.61126e-33
Bcam	6.82103	4.91547	0.000400072
Gm10505	10.248	4.90585	0.000189994
Gm8430	288.018	4.89932	0.0258908
Mef2b	78.08	4.89792	0.00741644
Rnd1	586.338	4.89686	2.63713e-54
Fmo3	67.83	4.88624	1.45719e-15
Tll1	41.9695	4.88469	4.38297e-24
Tnfsf18	94.0493	4.86561	3.17819e-15
Folr1	25.65	4.86121	4.36543e-13
Tmem246	6.73677	4.86116	0.0045287
Ninj2	25.8424	4.8358	6.11598e-09
BC051019	6.8173	4.82983	0.0015889
Scn3a	16.9456	4.8275	1.05054e-08
Gm43154	35.3263	4.80414	0.00118576
Shank2	22.5862	4.78452	8.40865e-06
Hist1h4h	20.5801	4.77339	1.40624e-09
Adam22	234.575	4.76582	1.14215e-09
Slc17a7	5.76032	4.76264	0.000944211
Wnt11	29.781	4.75226	1.43111e-11
Klk14	5.47072	4.73385	0.000467538
Cd74	18.4667	4.72892	4.5387e-10
Klk8	65.8813	4.71845	1.66666e-16
Sh3bgr	6.33077	4.69523	0.000675383
Fyb2	205.462	4.69002	7.47786e-19
Afap1l2	7.39197	4.6756	0.000422214
Lims2	179.016	4.66208	1.62393e-31
Syk	89.2727	4.66128	6.14423e-12
Sorl1	6.29132	4.64776	0.00361251
Prl3d2	7.10839	4.64096	0.00146737
Tslp	20.9833	4.63986	2.00162e-13
Fras1	50.5421	4.62445	0.00229452
Hp	45.6433	4.61265	1.26376e-16
Hist1h4i	68.6987	4.60917	1.31174e-18
Aldh1a1	6563.73	4.58786	3.08616e-36
Ttn	108.536	4.58675	0.000200444
St3gal6	28.199	4.58262	1.05477e-10
C530050E15Rik	28.3054	4.57091	1.3398e-12
Btn1a1	43.1525	4.56827	4.29091e-11
Gm10256	43.0094	4.55557	1.9562e-11
Pdgfb	7.20281	4.55353	1.17403e-05
Ripor2	382.915	4.55311	9.3772e-38
Ptgs2	3952.83	4.52233	2.59546e-23
Emcn	5.59271	4.51946	0.00165821
Crybg2	69.9443	4.49834	3.54926e-37
Fgf21	49.4827	4.49505	3.86689e-07
Zfp750	9.30652	4.48716	0.000485348
Nkpd1	5.18649	4.48208	0.000715071
Vmn1r-ps128	315.81	4.48132	3.06785e-33
Best3	5.26857	4.47682	0.00138707
C1qtnf3	20.4942	4.47624	1.70175e-09
Clca3b	16.0026	4.47314	2.54211e-07
Fap	55.2208	4.45217	1.05574e-13
Ifitm10	12.423	4.44337	2.13288e-05
Krt14	42.8436	4.44283	4.35773e-07
Nes	211.71	4.4343	5.12867e-17
Pkhd1l1	6.11466	4.43236	0.00188554
Ccdc81	6.3181	4.43168	0.00231054
Pkp1	13.7725	4.42131	3.51674e-10
Tmem71	6.05739	4.40032	0.00119138
Spo11	29.7567	4.36093	0.00413642
Ip6k3	40.3684	4.36005	1.21403e-18
A730049H05Rik	20.8064	4.33395	4.89342e-05
Gata3	165.703	4.30013	1.40894e-32
Cmklr1	11.0591	4.29845	1.95578e-05
Gpr39	133.086	4.29317	5.8273e-28
4930590J08Rik	8.3098	4.28253	3.74177e-05
Ccl6	20.1502	4.26498	8.58302e-07
Pkp2	365.327	4.24557	5.79659e-58
Islr2	6.80116	4.24539	0.000173847
Chst1	44.5196	4.24383	2.41066e-07
Fst	208.705	4.23354	3.74549e-23
Sema3d	11.7324	4.23159	7.65297e-08
Gm53	5.85482	4.22869	0.0114906
Atp2a3	10.6744	4.21703	5.93863e-05
Slc39a4	5.3281	4.20821	0.000567369
Svop	24.5737	4.19427	3.67438e-10
Gm6088	11.0474	4.18878	0.00875359
Erbb3	69.4612	4.18613	2.41373e-11
Gm13713	5.07248	4.18601	0.00246519
Gm27406	15.9308	4.15178	2.15552e-07
Sdcbp2	61.6266	4.15038	1.21918e-19
Gm20521	108.193	4.1473	2.58928e-18
Stbd1	242.833	4.13135	1.36265e-60
NA	87.8527	4.11868	1.94446e-20
Prelid3a	26.9271	4.11027	6.46479e-13
1110017D15Rik	13.7426	4.10817	1.61668e-06
Prss27	17.7206	4.10472	1.76197e-07
Itgb7	197.254	4.1001	1.3057e-27
Serpina1a	229.691	4.08879	6.44124e-28
Mamld1	9.31357	4.08363	0.000167004
Cdh5	11.0026	4.07872	0.00832524
Sh3tc2	46.0176	4.07688	5.81947e-22
Gm13284	12.9921	4.06577	0.00906011
Fendrr	16.4166	4.06163	4.94497e-11
Gm10230	10.1898	4.06057	0.0003476
Npr3	1290.29	4.05591	1.05092e-23
Klra5	12.8328	4.04007	1.87939e-05
Cyp24a1	5.8173	4.03978	0.0240898
Tgtp1	20.6147	4.02043	1.57358e-06
1700013F07Rik	7.10914	4.01366	0.000114256
Htatip2	7.89252	4.00963	5.51196e-05
Atp2b4	128.206	3.99465	1.64712e-20
1110002E22Rik	5.89952	3.98698	0.0018664
Hspb7	111.585	3.97924	2.81512e-17
Mab21l3	6.5462	3.97235	0.000232534
Gm13415	175.334	3.96577	1.02487e-09
Hbb-bh1	14.9421	3.96309	0.00350587
Vwce	9.51362	3.94871	0.000102259
Serpina1c	24.4037	3.94316	0.00199401
Fcgbp	17.6499	3.93024	5.45457e-06
Fgd5	6.72017	3.93006	0.00292864
Itgam	17.4115	3.91938	3.36348e-05
Ccn2	7484.58	3.89686	6.9985e-17
Pla2g5	14.7706	3.88961	0.000284098
Itgb4	228.691	3.88525	6.9745e-08
Slc1a7	20.647	3.86521	2.49224e-11
Lamc3	81.7366	3.86437	2.73163e-12
Rassf6	30.4641	3.86409	6.03517e-07
2310002F09Rik	28.5421	3.86242	1.06494e-08
Serpinb1b	80.3828	3.85145	3.90568e-22
Gm16702	278.18	3.83479	4.66331e-38
Tmem182	44.6317	3.82521	4.85102e-09
Tuba8	7.27493	3.80803	0.000419138
Gprc5a	2003.57	3.80725	2.50964e-41
Klra1	6.79692	3.80264	0.0144336
Arhgap45	18.5664	3.8017	2.06063e-09
Cdc42bpg	72.4716	3.80098	6.65375e-09
Tnn	22.3836	3.79745	8.02409e-08
Gm19345	11.4622	3.78887	2.10431e-05
Gjb5	5.453	3.78084	0.0121243
Gm17090	14.7525	3.76535	1.14227e-06
Cth	393.519	3.76467	9.86229e-09
Slc2a5	32.5193	3.75457	0.000111645
Txlnb	29.588	3.74169	3.22379e-11
Foxn1	11.8092	3.74019	3.79338e-05
Tm4sf4	8.03116	3.73518	0.000156546
Slc17a9	18.005	3.73023	2.7107e-06
Soat2	50.1027	3.72155	3.93115e-19
Pim1	2348.87	3.7187	5.24742e-29
Hoxb3os	9.4246	3.71038	0.000139201
Rtn4rl2	154.968	3.70909	7.72196e-20
Ptprv	67.1469	3.68042	4.77805e-08
Brsk2	7.69045	3.6775	2.96563e-05
Card14	94.2188	3.67418	0.00725957
Car14	32.9969	3.67128	6.34629e-09
Ppp1r9a	32.1408	3.66867	0.00277712
Kank4os	15.9161	3.66768	1.60088e-08
Hoxb3	9.19371	3.66587	3.04886e-05
Hacd4	175.973	3.65371	1.36539e-30
Ano3	117.044	3.65045	4.65183e-39
Sult4a1	8.2985	3.64943	0.0388599
Tmem144	24.4305	3.64737	2.09142e-10
Cavin2	13533.1	3.64325	2.76107e-28
Mycl	20.2114	3.63891	1.98214e-09
Efcab8	17.7495	3.63756	1.40083e-08
Eda2r	1123.27	3.63451	2.28048e-50
Bach2os	7.93623	3.63047	0.00624285
Gm6133	18.6208	3.61896	8.82627e-08
S100a7a	436.701	3.60224	3.56484e-38
Gm20400	779.139	3.58352	4.29069e-21
Dusp18	16.5537	3.58171	1.20109e-06
Mmp15	11.3276	3.58009	1.81368e-05
Cd68	539.089	3.56771	1.5631e-22
Pde1a	91.3923	3.56068	2.10091e-19
Trap1a	12.3381	3.55949	2.58881e-06
Nfam1	6.77098	3.55516	9.47685e-05
Rasl10a	6.66973	3.55238	0.000124943
Csrnp1	607.384	3.55061	7.22013e-28
Piwil2	15.3765	3.54777	4.80657e-06
Serpine1	8069.15	3.54268	5.94807e-26
Fam71f2	47.8792	3.54209	1.10496e-13
Vmn1r40	12.07	3.53756	3.64333e-05
Drc1	7.20544	3.53604	0.00136687
Crx	15.3876	3.5323	8.40865e-06
Adra1d	14.405	3.51611	0.000173964
Cyp4f14	11.0506	3.51071	0.0267416
BC051077	62.1749	3.49456	3.86941e-16
Gm14341	16.9376	3.47913	0.000174616
Gm15287	92.6024	3.46906	8.84648e-24
Inka2	122.816	3.45461	1.12335e-16
Gm12840	2928.57	3.45201	2.15405e-11
Cd80	43.1441	3.45083	4.02163e-11
Rbmy	70.4737	3.44954	7.88855e-08
Pcdh9	103.423	3.44539	1.4029e-18
9530053A07Rik	64.3729	3.44393	3.20022e-08
Cdkn1a	10457.6	3.43817	1.93314e-41
Dcdc2a	6.01121	3.43717	0.00234185
Fam71f1	49.3539	3.43484	7.77896e-14
Ecscr	21.5515	3.43021	0.0298721
Ak7	5.83558	3.42994	0.00256498
Tmem184a	18.1597	3.42643	0.000130873
Gadd45b	5683.92	3.4239	1.02915e-34
Parvg	9.60611	3.41081	0.000139188
Tpd52l1	5.15098	3.40611	0.00380885
Hes1	186.857	3.40164	4.02163e-11
Itih4	19.7059	3.3923	8.36622e-07
Ces2g	117.943	3.39069	7.78375e-18
Gadd45g	1363.86	3.37536	2.84703e-38
Ppp1r3a	78.0668	3.36823	1.31547e-06
Hist1h1c	1898.76	3.36467	1.31211e-22
Shisa6	8.9042	3.36415	0.00127685
Plac8	10.1334	3.35923	7.18228e-06
Acox2	9.84335	3.35327	6.40281e-05
Aldh1l1	17.66	3.3469	0.000433216
4921536K21Rik	33.3751	3.33562	1.42748e-10
Ankrd1	4164.1	3.32986	9.87351e-25
Efhd1	6.47739	3.32707	0.00331928
Stard8	6.07483	3.31979	0.0048737
Chn2	8.32244	3.29422	0.00043444
Tinagl1	7597.99	3.2893	4.26023e-44
Gm12505	700.528	3.28176	5.98497e-23
Cpz	10.4857	3.27408	0.000817583
Rspo4os	11.5071	3.27086	1.02043e-06
Hist1h2bc	898.562	3.26946	7.53125e-15
Muc2	8.80912	3.23501	1.4586e-05
Gm13067	13.0292	3.23028	9.71259e-06
Mreg	281.105	3.22668	6.68721e-18
Eps8l2	14.9763	3.20333	0.0153485
Chac1	2414.32	3.19904	3.02446e-41
Mgll	24.8496	3.19577	7.45596e-06
Slc14a2	5.19824	3.19574	0.0125628
NA	1301.96	3.1945	1.25468e-35
Adgrg6	18.6663	3.19125	9.03128e-07
Ms4a4c	8.55212	3.18953	0.00544939
Hist1h2bq	18.5108	3.18423	4.97334e-05
Catsperd	26.5426	3.18047	1.05369e-09
NA	101.866	3.1793	1.3548e-27
Myh11	10.2782	3.17435	0.000378854
Dyrk4	47.6637	3.172	6.61167e-14
Tnnt2	43.7598	3.16679	4.45398e-06
Suox	3135.58	3.16355	8.17546e-64
Stxbp2	15.114	3.16229	8.82606e-05
Id4	162.21	3.15236	1.65441e-23
Hoxb6	11.0481	3.14476	0.000612569
Eml2	184.966	3.12936	2.45211e-22
AU018091	5.2365	3.12556	0.0343213
Gdf5	22.5718	3.12396	1.1725e-05
Ccdc106	72.3699	3.10418	5.41648e-25
Gpr68	23.12	3.10211	2.99127e-07
Gm26579	5.92831	3.10156	0.00280953
Mcam	18.6258	3.09834	4.9096e-06
Chrm1	15.2512	3.08569	6.33487e-05
Tlr1	42.2317	3.0851	1.50599e-15
Tceal5	16.3223	3.0776	0.000308158
Tubb4a	66.1147	3.0709	3.34453e-28
Hrc	7.30196	3.05908	0.000274021
Adrb3	11.4173	3.05785	0.000572579
Acvrl1	34.106	3.05394	7.089e-08
Crabp2	68.1968	3.04996	4.1044e-17
Slc24a3	7.06457	3.04858	0.0426127
Hist1h1e	12.4531	3.04758	3.69991e-05
Camk2a	97.0639	3.04428	7.29443e-15
Gm12185	28.3835	3.04279	3.87633e-06
Fgd6	331.605	3.04235	2.82361e-29
Apol9b	84.642	3.03981	7.73772e-14
Prss23os	1155.33	3.03597	2.03011e-31
Mrvi1	124.373	3.03557	1.64598e-12
Taf7l	8.4165	3.03462	0.00366627
Cyp2c55	890.339	3.03252	5.27138e-52
Fbxw10	18.3928	3.03121	0.000520636
Nr1d1	3745.69	3.02876	2.0511e-09
Csf1r	229.307	3.02378	8.49043e-14
Il3ra	21.8702	3.02175	3.08831e-07
Itga3	4169.26	3.01914	7.20814e-31
Il7	12.9041	3.01698	3.35749e-05
NA	5.21045	3.01519	0.00535734
Ccdc113	31.5383	3.00213	0.00170283
Cntfr	7.67095	2.99494	0.00265703
Gm26708	7.91283	2.99424	0.000634494
Apol7d	28.8615	2.99141	1.77059e-09
Enkur	17.5217	2.99113	0.00176865
Lrrc24	8.09439	2.98356	0.0120659
Dusp8	245.719	2.97998	1.17491e-21
Gm38393	571.023	2.97773	4.23853e-23
Mslnl	8.19116	2.97497	0.000246994
Olfr1318	12.8938	2.97466	0.000317326
Zbtb7c	40.91	2.96696	4.62011e-12
Gm10109	6.4094	2.96006	0.0173648
Has1	15.9996	2.95785	0.00108877
Nlrp4f	12.241	2.9537	2.77563e-05
Hist1h2ac	24.7419	2.94525	9.88068e-07
Kcnu1	19.0465	2.94492	0.000111601
Rap1gap2	970.539	2.94462	5.93804e-30
Ptpru	9.86757	2.94024	0.00190595
Hist1h2bg	15.8432	2.94004	0.0358589
Casp14	18.0441	2.93794	0.000373656
Myrfl	5.47279	2.9379	0.00905804
Rhpn2	103.224	2.93778	2.40374e-16
Slc43a3	2964.66	2.93249	3.52062e-32
Tmem132b	17.5317	2.92807	0.000173359
A330033J07Rik	5.57648	2.92736	0.0101158
Pgf	5.84826	2.92631	0.00314455
NA	7.96478	2.92454	0.000615342
Pdlim1	2636.81	2.91998	1.36145e-21
Aif1l	2280.4	2.91918	1.00712e-44
Stox2	10.8713	2.91514	0.000115308
Lman1l	19.177	2.91079	0.000195976
Cxcl1	119.975	2.89428	7.11072e-12
Prkaa2	23.6089	2.89144	3.80564e-07
Ppp1r32	13.4553	2.88743	0.00011261
Tmem37	109.536	2.88619	5.11612e-23
Trim7	396.682	2.87677	1.92641e-59
Insl6	38.1948	2.87596	2.03457e-15
Trib3	1385.44	2.87405	4.64905e-17
Usp17lc	5.35171	2.87366	0.0319494
Pla1a	89.475	2.87087	2.00424e-10
H19	1822.87	2.86643	0.000277583
Disp2	132.671	2.86125	1.32312e-26
Grin3a	5.74326	2.85788	0.00396691
Sulf1	1797.81	2.85556	6.0044e-22
Apob	19.0315	2.85481	0.00247126
Plaur	1149.59	2.84488	2.7296e-26
Llgl2	523.028	2.84457	1.15588e-31
Txk	7.53937	2.84264	0.00722037
Mylpf	41.0963	2.84047	1.60766e-13
A230072E10Rik	9.52952	2.83644	0.0054202
Gm23849	8.01641	2.8329	0.00672451
Gm6166	5392.04	2.8278	1.23324e-49
Nalcn	35.6845	2.82313	1.26495e-07
Brinp1	311.655	2.81974	1.09659e-14
Cystm1	169.287	2.81661	4.00869e-14
Gm3376	148.22	2.81614	9.50678e-19
Far2os1	51.8405	2.81019	2.65968e-05
Psg17	21.4702	2.81016	0.000918524
Elavl3	5.17449	2.80988	0.00941672
Calcrl	135.284	2.79694	6.06672e-08
Psrc1	2282.57	2.79278	5.32394e-33
Perp	26.9901	2.78733	9.81726e-06
Gm12037	11.0513	2.78257	4.95166e-05
Adgrd1	8.97435	2.78109	0.0188097
Lag3	35.7173	2.77919	4.33196e-12
Acer2	5.82046	2.77873	0.00955843
Gm11525	36.8013	2.77865	5.30962e-11
Mapk4	10.7908	2.77733	0.00172927
NA	324.8	2.77718	2.64268e-15
Itga2	5.07358	2.77427	0.0253835
1110035H17Rik	5.16977	2.76144	0.0109365
Cited2	5203.84	2.76031	3.46367e-90
Cdsn	1502.66	2.75879	6.51483e-32
Cgnl1	1941.4	2.75634	1.36587e-14
Acer1	15.4656	2.74595	2.2796e-05
Adamts9	285.326	2.74389	7.99728e-16
Fabp5	6643.32	2.74108	2.50048e-53
Ephx1	9309.26	2.73938	1.5315e-41
Gm13710	14.9198	2.73682	0.0154967
Btg3	59.408	2.73666	0.0278982
Trpm5	54.9835	2.7323	1.81187e-13
Rasgef1a	8.73535	2.7285	0.000430381
Fabp4	102.797	2.72677	1.63033e-14
Rasgrp3	117.912	2.72623	8.69864e-24
Klf5	911.993	2.72314	7.52131e-48
Mfap3l	581.845	2.7141	1.17962e-26
Nxf3	15.3805	2.71318	0.000465569
Cspg5	5.28249	2.71297	0.0238948
3830403N18Rik	23.8022	2.71248	4.96577e-09
Rpl29	569.759	2.70664	1.33936e-24
4933417D19Rik	27.8523	2.70617	1.54974e-08
Wdr66	88.1271	2.70087	5.54454e-20
Serpinb6c	18.6077	2.6985	0.0319949
D630029K05Rik	40.7902	2.69493	2.66895e-11
Angptl6	251.31	2.68921	2.94543e-27
Atp8b3	5.39718	2.68593	0.0287285
Notch3	14.4193	2.68103	8.78183e-06
Gria3	1179.23	2.67419	8.94614e-34
Pax8	75.1137	2.67398	0.00328537
Arl9	5.95129	2.6701	0.0156513
Styk1	452.367	2.66919	4.3003e-19
Gm27224	10.4132	2.66565	0.0119939
Ifit1bl1	78.35	2.66522	2.49441e-11
Tgm2	2829.88	2.66212	1.66934e-48
Unc5c	5.83703	2.65107	0.00828514
Atf3	486.708	2.65057	3.00239e-35
Snhg15	979.434	2.64737	1.78381e-36
Ccn1	16942.6	2.64053	2.57154e-09
Plch2	6.80368	2.6405	0.0149337
Adcyap1r1	11.1452	2.63955	0.00348416
Fas	523.474	2.63197	1.50808e-31
Cfap70	23.3829	2.62864	0.00325293
Pard6b	681.024	2.62671	2.39339e-18
Ddias	367.242	2.62654	1.74874e-11
Esr2	5.59804	2.62437	0.00252423
Cnksr1	26.3964	2.62052	0.00117701
Hist1h2ae	5.95294	2.61757	0.00853371
Pygm	20.097	2.61579	0.000645594
Gm5570	6.54343	2.61328	0.0101273
Clca4a	15.0127	2.60824	0.000977868
Dennd2d	8.9194	2.60652	0.0172078
Sema6b	29.711	2.60295	3.90395e-07
Tnni2	25.5221	2.60115	0.000168248
Trim72	12.4588	2.59935	0.00138285
Hes7	30.3535	2.58718	1.35241e-10
Vmn1r43	19.1844	2.58385	0.00454279
Arl4d	342.751	2.58188	5.61968e-15
Klf15	6.44747	2.57992	0.00667359
Dyrk3	209.797	2.57966	5.39059e-35
Dll4	13.8711	2.57859	0.000850392
Jag1	1491.58	2.5768	1.56977e-27
Ncf2	13.4177	2.57549	0.00513419
Ripk3	33.3137	2.57535	6.17952e-06
Pla2g4b	67.6178	2.57485	7.78076e-07
Gm13988	25.6352	2.57395	0.00106068
Gm13981	7.33767	2.57391	0.00189206
Dlc1	2597.47	2.57113	1.12536e-58
Acmsd	84.3831	2.56687	2.33096e-11
Tnfaip3	769.744	2.55454	1.18965e-24
NA	10.8783	2.55156	0.00368333
Wnt9a	916.147	2.5509	2.01315e-28
Hist1h2bk	54.9734	2.54783	4.5951e-05
A3galt2	6.70366	2.54591	0.0106592
Foxf1	338.94	2.54557	1.28138e-61
Tigit	30.288	2.54337	3.72287e-08
Hist1h2bl	33.1839	2.5373	0.000166386
Fam107a	8.43716	2.5367	0.00395959
Fgf18	10.0584	2.53637	0.00217991
Gm16166	9.03589	2.53453	0.00522126
Mylk2	10.0017	2.53427	0.000419476
A230050P20Rik	6.10578	2.52843	0.0050302
Itga7	815.144	2.52475	3.59779e-17
Colec11	15.1532	2.52141	0.000173739
Arhgef28	758.863	2.52006	7.71812e-46
Plekha6	15.6018	2.51952	0.00979389
Ifi44	10.7623	2.51467	0.000905665
Itga1	65.1732	2.50621	2.09635e-11
Lama2	873.841	2.50571	1.94739e-17
Pram1	33.2473	2.50319	0.000187804
NA	141.938	2.50245	3.17567e-13
Tg	42.0632	2.50098	0.00129105
Vmn1r45	6.48979	2.4949	0.0171977
Slc6a15	33.4923	2.49193	7.80236e-06
Hist1h2be	35.4358	2.49146	5.40247e-08
Lta	33.8405	2.49142	4.21504e-09
Sema3e	12.6723	2.48766	0.0040776
Ttpa	5.4066	2.48682	0.0416585
Foxs1	115.542	2.48507	9.76487e-14
Fxyd5	177.009	2.48373	8.50334e-11
Fat2	8.05602	2.48167	0.0315554
Snhg6	1874.93	2.48046	3.76814e-29
Ablim1	3555.85	2.47604	2.85155e-33
Plb1	53.1638	2.47293	9.47327e-08
1700015F17Rik	5.54917	2.47233	0.00981028
Cfap43	26.3488	2.47187	5.08619e-05
Nkain3	6.73636	2.46981	0.00744954
E330013P04Rik	7.30219	2.46443	0.00807813
P2ry6	8.54463	2.46276	0.0195404
Mirt1	5.89298	2.46169	0.0305994
P2rx3	1054.95	2.46086	1.14064e-06
Tjp2	3236.99	2.4577	1.16357e-31
NA	125.656	2.45732	7.66468e-09
Tent5c	31.8844	2.45452	1.1216e-06
F11r	12.5259	2.45036	0.00152169
Cnn1	11.1513	2.44496	0.000267297
Syt17	46.8465	2.44284	8.38333e-07
Klhl30	170.201	2.44278	1.77694e-07
Gja1	1405.95	2.44238	7.86446e-13
Dgat2	90.8686	2.43765	1.69272e-16
Spon1	17.9031	2.43507	0.000128071
Gm6311	19.5835	2.43411	0.0042368
Cd209c	391.252	2.43256	6.71928e-10
Ppm1h	131.711	2.42971	1.28495e-08
Hyal3	30.5649	2.42921	2.18077e-06
Amd-ps3	45.5337	2.42235	0.00884865
Snord55	6.83401	2.4205	0.00564259
Upp1	35.4715	2.41983	4.28011e-05
Prss23	12096.7	2.41815	3.79547e-48
Zbtb8b	15.332	2.41763	0.00206066
Spdef	6.00928	2.41655	0.0177664
Skap1	6.50101	2.41528	0.00993047
Klra17	8.1159	2.41434	0.0259583
Cdhr2	8.71526	2.41117	0.0375558
Dusp14	1099.25	2.41084	1.40894e-32
Gm12454	22.7433	2.40958	5.04046e-05
Hist2h2aa2	243.085	2.4078	1.20945e-06
Pappa2	2623.49	2.40748	2.62387e-29
Nlrp4e	17.5464	2.40551	0.00850815
Ppfia4	8.42056	2.39992	0.00425254
Tmc7	16.6533	2.39823	5.12315e-05
Hbegf	543.538	2.39145	2.22729e-22
Cd37	12.3825	2.3898	0.00325614
Ikzf2	190.722	2.38651	9.66718e-10
Lyrm9	234.522	2.38614	2.02133e-20
Popdc3	16.7202	2.38528	0.00023592
D6Ertd527e	17.7753	2.38321	0.000287192
Sptbn4	27.9721	2.37612	0.000763238
Hecw1	7.38388	2.37516	0.00454277
Pmp2	16.1772	2.37394	0.00151706
Hcrtr1	11.6373	2.37224	0.00012853
Aqp6	6.59685	2.37198	0.0126314
Flt3	12.61	2.36942	0.000143634
Sbsn	1060.83	2.36232	3.32707e-52
Klf4	2396	2.36151	8.08607e-38
Pim3	2043.37	2.36141	5.73296e-24
Rhbdf2	448.645	2.36094	9.87035e-42
Arl5c	11.2525	2.36087	0.000137529
Zfp941	7.94307	2.35554	0.0251479
D630023F18Rik	6.98901	2.35454	0.024778
Cyp2s1	8.77257	2.35245	0.0217736
2200002D01Rik	188.591	2.35101	3.15968e-21
Rpl12	5438.52	2.35027	1.66359e-26
Alas2	5.70414	2.34971	0.0284147
Mst1	6.56499	2.3486	0.00820209
Rnf128	22.0282	2.34819	0.000589221
Rassf7	636.397	2.34746	2.7666e-18
Proca1	10.974	2.34045	0.0010096
Trac	20.1752	2.33876	9.50637e-06
Ifitm1	15.279	2.33792	0.00100238
Gm5106	7.07986	2.33686	0.0161045
Gdap1l1	51.6148	2.33655	9.23821e-05
Tnnc1	109.152	2.33548	1.58907e-19
Gabre	296.546	2.33526	8.25829e-22
Gtse1	869.287	2.33482	8.93236e-11
Bcar3	810.138	2.33398	1.4857e-30
Obscn	23.8335	2.3314	0.00344835
Gm26809	35780.5	2.32939	1.34546e-13
Steap1	1193	2.32833	7.26035e-15
Gm16061	14.2603	2.32087	0.00541848
Kcnj14	9.64367	2.32039	0.0021161
Btg2	1025.67	2.31899	4.15847e-15
5430416N02Rik	1000.53	2.31491	7.69155e-87
Igfbp4	605.66	2.31304	5.85114e-09
Anxa3	7482.76	2.31244	4.82703e-25
Rdh9	51.9867	2.3122	2.67795e-07
Pde6g	13.4121	2.31014	8.1665e-05
Prickle4	8.01411	2.30871	0.00585682
Gsdmc4	5.21948	2.30362	0.0213939
Frat2	305.788	2.30134	3.42851e-19
Slc22a13b-ps	8.8269	2.29873	0.00495199
Avpi1	1533.79	2.29745	1.12571e-58
Gdnf	878.659	2.29458	9.75636e-21
Eln	24.7987	2.29149	6.36922e-05
Cldn15	6.75899	2.29089	0.0155514
Lenep	70.2866	2.2815	1.31472e-05
Spns3	13.8364	2.27442	0.0158158
Epha2	1944.11	2.27409	3.44137e-14
Sema4a	10.7638	2.27155	0.00614146
Atg16l2	1186.28	2.27062	1.19861e-13
Dusp1	2323.36	2.26193	1.00627e-13
Arl14epl	50.5468	2.26125	1.48099e-10
Ddit4	1013.74	2.26103	1.26349e-35
Gm1141	15.3311	2.25962	0.000245047
Cxcl10	13.0947	2.25821	0.00305524
Npy1r	34.6135	2.25477	2.58149e-06
Nectin4	8.83963	2.25314	0.0120545
Tspan12	74.6818	2.24045	5.31261e-08
Rab3c	286.38	2.23827	5.73617e-07
Hist2h2aa1	50.363	2.23819	0.0233344
9930111J21Rik2	470.863	2.23799	2.45589e-10
Spock2	18.6998	2.23659	3.97316e-06
Ptpn22	7.50157	2.23575	0.0436488
Lmntd2	7.73438	2.23556	0.0160889
Il11	23.3421	2.22869	3.26387e-07
4930486L24Rik	435.539	2.2278	2.35542e-09
Ccl5	19.0303	2.2268	0.000423193
2410006H16Rik	10631.4	2.22622	1.10025e-15
Heph	11.4374	2.22053	0.0192294
Dbhos	23.8002	2.21606	9.42916e-06
Mbp	219.51	2.21567	2.10853e-15
Aqp5	257.823	2.21441	1.69967e-12
Emx2	282.5	2.21202	6.90558e-19
Faim2	94.5207	2.20184	1.16757e-14
Cgn	236.025	2.20179	2.28416e-09
Grk5	918.525	2.20047	4.74014e-19
Cep295nl	32.7266	2.19812	4.96871e-08
Ptafr	9.39269	2.19557	0.000760213
Zfp36	1397.59	2.19547	3.22329e-11
Zfp341	461.723	2.19421	7.22058e-24
Poln	47.9599	2.19157	1.09232e-07
Mfsd6	21.5132	2.19007	0.00325072
Flt1	1329.71	2.18797	3.99545e-75
Ifit1	122.496	2.18672	7.04453e-15
Sla	6.12199	2.18177	0.0482044
Tubb3	51.3541	2.17369	1.79119e-06
Optc	22.3132	2.1734	6.70746e-05
Gm11520	9.98397	2.1703	0.00194374
Ptx3	4202.89	2.16971	3.06719e-10
Ttc25	33.3401	2.16666	0.000402579
Gm15640	32.6141	2.1616	2.57574e-05
Procr	826.051	2.15827	3.14933e-24
Syngr3	13.501	2.15625	0.0153169
Thsd7b	12.2717	2.15149	0.0182612
Sema3a	2160.94	2.1468	8.55007e-12
Map2	61.1152	2.1444	7.33725e-09
AW047730	11.9843	2.13622	0.0208145
Ppp1r2-ps4	7.02067	2.13615	0.025511
Lrp2	44.9614	2.13473	1.84429e-05
Noxred1	5.25716	2.13331	0.0102922
Cd96	6.04585	2.12909	0.0309495
Gipc2	16.0911	2.12675	0.000611442
Creb3l3	9.15282	2.12641	0.00981525
Tbx6	29.7974	2.12317	7.42491e-06
Wwc1	1254.51	2.12038	3.23308e-18
Bbc3	624.09	2.10689	4.33229e-26
Icam1	7.77692	2.10183	0.0247946
Gm11642	21.1304	2.10149	9.39961e-06
Mroh6	11.7668	2.10057	0.00406785
Gm11476	21.6878	2.10049	0.000212502
Ckap2	2101.54	2.09593	5.21538e-12
Ppp1r15a	3481.36	2.09353	3.90564e-36
Ovgp1	83.5052	2.09257	4.0676e-06
Abat	7.9587	2.091	0.0304301
Jag2	9.33033	2.08403	0.00368606
Gm14057	34.7491	2.08239	3.97453e-07
Lrrc75a	924.749	2.08097	9.51156e-52
Slc16a8	7.86923	2.0803	0.0126652
Mcub	378.097	2.07385	2.06133e-23
Epha1	75.8621	2.07255	1.2623e-13
Fhl1	107.271	2.06662	0.000386119
Platr14	62.6936	2.06577	4.14943e-09
4933406C10Rik	13.8313	2.06467	0.00107728
Usp17le	14.6759	2.06217	0.0146892
Gca	78.2071	2.05835	3.5765e-08
Aaas	2372.65	2.05253	1.06183e-16
Pstpip1	90.413	2.05211	7.02337e-09
Gpat3	333.521	2.05129	2.07827e-19
Mpeg1	23.1635	2.05065	0.000745517
Ngf	909.539	2.05037	1.62517e-20
Gch1	62.9056	2.04832	2.56728e-07
Ddit3	6642.72	2.04655	8.27525e-18
Gm12693	66.3424	2.04477	0.000166386
Gm12643	5.091	2.04425	0.0195317
Sap25	22.9336	2.04203	0.00405102
Pkd1l3	40.6579	2.04135	4.80482e-09
2010300F17Rik	13.1388	2.04029	0.00579291
Car9	41.7109	2.03786	6.3803e-05
Nyap1	908.685	2.03778	2.24317e-23
Car5b	116.617	2.03287	5.8832e-18
Hist1h2al	73.645	2.03279	1.03148e-06
Rasgrp2	25.3332	2.03247	0.0358489
Ripk2	653.004	2.02887	2.64617e-66
Thbs1	56074	2.02674	1.30499e-09
Fry	21.3299	2.02598	0.000768549
Camk2b	29.4969	2.02579	0.00212571
Prkcg	214.771	2.02446	8.23771e-17
Ccdc18	133.631	2.02202	0.000107153
Dbndd2	321.974	2.02131	5.66289e-17
B4galt4	584.345	2.01674	1.78283e-40
Rnu1a1	7.85051	2.01593	0.0217785
Gm16170	35.3825	2.01398	4.22695e-05
Ptgs2os	66.7624	2.00652	1.45078e-07
Slc43a2	56.2889	2.00253	2.56118e-05
Reep6	146.638	2.00034	1.67664e-19
Stap2	79.9004	1.98933	9.06956e-14
Lipg	535.173	1.98593	4.86643e-19
Gm9967	10.0629	1.98536	0.00676194
Rhof	50.5835	1.9847	6.3345e-07
Synb	17.5918	1.98022	0.00299431
Krt7	1408.92	1.97619	4.08023e-11
Ncam1	1630.79	1.97267	8.50627e-28
Gm16998	21.0663	1.9716	0.000600815
Arhgap19	667.757	1.97061	2.15944e-11
Il2rb	49.3821	1.96848	5.62868e-06
Gm11427	43.6166	1.96791	9.46081e-07
Gm11425	8.58176	1.9654	0.0261867
Prg4	107.048	1.96472	0.000473142
Gm9750	83.5296	1.96442	1.08719e-06
Gm2541	306.225	1.96295	3.19701e-08
Mapk15	11.1285	1.96048	0.0110306
Olfr1314	22.5936	1.96005	2.38981e-05
Tlcd2	144.263	1.95953	4.50324e-15
Tob1	562.354	1.95588	2.45484e-20
Rpl10a	10385.2	1.95316	2.36788e-18
Zfas1	5923.01	1.95298	2.78202e-17
Pfkfb3	882.241	1.9484	2.07263e-11
Gm16253	14.9915	1.94573	0.000180706
1110046J04Rik	236.266	1.94283	3.75775e-13
Spire1	861.397	1.94169	3.81646e-32
Adra1b	80.7311	1.94141	1.2376e-07
Gjc2	6.21039	1.93669	0.0404634
Abcb1b	1465.6	1.93339	4.31802e-30
Gng3	55.7802	1.92658	4.16528e-05
Gm42743	86.7926	1.92447	8.24677e-05
Dglucy	1002.1	1.9221	1.0228e-22
Plcd3	1876.45	1.92169	1.41226e-14
Myoz2	26.2064	1.92048	0.0101323
Epb41l4aos	846.538	1.92047	5.56882e-12
Mmel1	15.8091	1.92021	0.00239801
Gm26917	957.874	1.9159	3.12583e-39
Cd93	188.258	1.91102	2.24982e-06
Ntn4	184.271	1.91014	3.37484e-13
Abca7	2260.68	1.90834	1.70195e-31
D930019O06Rik	18.4991	1.90386	7.51062e-05
Matn3	9.12213	1.89932	0.0304349
Ccng1	10250.7	1.89916	6.6428e-34
Gm13436	72.5382	1.89759	2.21972e-07
Ggct	110.657	1.89715	1.18843e-10
Plcxd2	1602.48	1.89675	3.07283e-29
Slc9a3r1	541.036	1.89502	3.72853e-15
Slmapos2	3326.36	1.89484	1.15236e-11
Cep72	201.861	1.89107	6.58909e-20
Gm11399	8.86406	1.89066	0.0125546
Pkn3	159.008	1.8903	2.86634e-08
Zdhhc2	222.392	1.88895	3.54835e-09
Ddah1	1706.49	1.88838	1.13601e-10
Als2cr12	58.853	1.88563	3.86263e-06
Sgms2	1191.81	1.88263	3.1661e-38
Nek2	1268.79	1.87936	2.5173e-09
Mdm2	3807.44	1.87789	3.84322e-40
9330171B17Rik	7.55439	1.8775	0.00749294
Mucl3	111.714	1.87696	2.60859e-10
Gm15730	7.29256	1.87496	0.0211197
Oasl2	31.3698	1.87493	0.000836653
Hpx	24.3152	1.87286	0.000420857
Pllp	6.1627	1.8694	0.0380557
Pnpla2	1540.39	1.867	1.02286e-19
Dbp	721.647	1.86429	1.1794e-08
Ripor3	41.9626	1.86406	0.00124251
Gm15694	10.9593	1.86114	0.00613557
Slc25a33	464.665	1.85955	7.37494e-34
Aoc2	159.816	1.85931	6.73711e-12
Prr11	1150.45	1.85821	2.4142e-10
Dusp15	15.6381	1.85801	0.00371584
Gm11517	11.3153	1.85724	0.00953335
Slc9a9	20.8768	1.85502	0.00896698
Kifc5b	429.922	1.85477	3.67186e-09
Tnfrsf21	266.515	1.85463	4.1044e-17
Ass1	199.832	1.85119	4.01393e-11
Polk	816.699	1.85102	2.41318e-21
Slc4a4	911.507	1.85052	3.65921e-14
9230114K14Rik	104.746	1.84999	1.29359e-10
Zbtb7b	2933.13	1.84991	5.73296e-24
Arrdc4	1906.49	1.84943	1.64571e-07
Lamc2	395.784	1.8491	1.58048e-11
Avil	62.469	1.84686	1.24387e-06
Gm11263	10.2203	1.83726	0.00568743
Mtss1	37.2625	1.83625	6.37023e-07
Chmp4c	13.4507	1.83396	0.0146129
Nhlrc2	1888.9	1.83365	3.3492e-67
Rhbdd1	2472.9	1.83342	3.20263e-32
Gm11884	8.16574	1.83304	0.0383259
Mafk	2125.93	1.83227	1.05977e-16
Ttll2	60.6508	1.82833	0.0203416
Zfp143	1097.91	1.82677	2.93712e-34
Gm11934	9.44574	1.82676	0.00563879
NA	13.1109	1.82648	0.0071671
Rgs17	87.0002	1.82287	3.95181e-06
Tns4	36.473	1.81931	0.00154852
Cybrd1	13.8646	1.81649	0.00165836
Gm12138	2019.19	1.8146	6.04321e-09
Myc	3282.76	1.81367	2.1061e-33
Eef2	390506	1.81353	1.08786e-17
Gm773	40.148	1.81297	0.000142775
Kif18b	709.532	1.81211	1.22321e-07
9230111E07Rik	13.9676	1.81113	0.00277856
Bst2	1204.43	1.80669	4.62774e-12
Slc37a2	33.4439	1.80646	2.67295e-06
Ube2c	1898.38	1.8064	1.89082e-08
Crybg1	279.352	1.8063	7.31709e-09
Cct2	26032.4	1.80525	1.90789e-42
Gm26788	40.9635	1.80479	1.72588e-07
Spata5l1	220.823	1.80251	1.35037e-11
Klra2	109.477	1.80137	7.34357e-06
Slc25a25	821.544	1.7978	3.88527e-13
Slc35g1	93.2118	1.79429	8.91001e-09
2610318N02Rik	78.5731	1.79338	7.78914e-06
Hspb6	825.736	1.79156	2.5451e-12
Gm13050	29.9662	1.78972	8.55344e-06
NA	63.6267	1.78909	0.00247048
Gm13532	26.6412	1.78759	0.00115075
Prkag3	47.0875	1.78518	0.00132855
Col20a1	635.223	1.78426	1.44878e-10
Usp2	268.407	1.7837	1.63279e-07
4833427G06Rik	113.596	1.78211	3.68121e-13
Col5a2	40728.6	1.78168	1.52987e-15
Lgals9	3984.47	1.78158	1.52264e-24
1110038B12Rik	8194.91	1.78082	2.38435e-20
Siglece	8.05101	1.77688	0.0119192
Hist1h1d	29.1634	1.77668	0.000258354
1700061G19Rik	8.01976	1.77558	0.0131877
Ppbp	8.06429	1.77522	0.0364719
Pidd1	231.843	1.77503	2.2902e-09
Ccdc170	17.3266	1.77212	0.000811477
Gm4841	16.5159	1.76934	0.00694606
Tspan32	38.523	1.76727	0.00141571
Fam110a	459.328	1.76614	1.38642e-12
Gm26574	14.5484	1.76356	0.0103821
Tnfrsf10b	1728.08	1.76302	1.71834e-21
Gpank1	589.397	1.75974	5.5497e-13
Fam241a	67.4537	1.7538	3.91803e-11
Fam169b	128.33	1.75157	1.73388e-06
Aim2	214.759	1.75089	3.28734e-15
Stk32c	7.69142	1.75017	0.016592
Wt1	33.018	1.74988	0.0148609
As3mt	32.983	1.74833	0.00118095
Clic3	21.7678	1.74825	0.00395959
Ahr	292.299	1.7473	1.83783e-13
Clpb	1889.54	1.74529	3.22062e-17
Fat1	9394.68	1.74178	3.06387e-15
Krt80	423.338	1.73644	1.66478e-08
Upk1a	25.379	1.73616	0.000152655
Mx2	49.681	1.7353	0.000115168
Blvrb	2497.9	1.73505	1.23672e-21
Rpl15-ps2	26.4542	1.73396	0.00156383
Snhg12	1711.85	1.7322	2.75692e-17
Vldlr	180.106	1.73215	4.01035e-07
Irf7	51.0882	1.73056	9.14918e-06
Spag4	73.3501	1.72797	1.77168e-08
Arhgef39	102.944	1.72792	8.28648e-06
Akr1b3	27184.1	1.72754	1.22484e-07
Gm11944	37.0662	1.72688	5.04709e-05
Gm5921	644.89	1.72616	4.40851e-17
Serpinb9	1571.53	1.72502	3.6351e-27
Asns	8358.73	1.72491	2.64214e-14
Myo1a	26.0262	1.72483	0.000702666
Per1	5421.88	1.72461	1.21624e-08
Rpl13a	71987.7	1.72274	1.72449e-18
Gm13832	8.69972	1.72167	0.0295321
Pfkp	1611.63	1.72102	7.04453e-15
Ecm1	1410.01	1.71844	5.9233e-09
Pcsk4	254.378	1.7164	7.08623e-23
Gm45837	28.6985	1.71607	0.00122572
Gm15246	19.6545	1.71537	0.00219929
Vwa1	45.313	1.71448	2.05165e-05
Znrf2	1311.36	1.71437	1.11508e-21
Eci3	9.30671	1.71378	0.0139245
Ybx3	12605.6	1.7129	1.57736e-26
Alcam	657.787	1.71213	6.21533e-12
Rpl35a-ps2	2188.97	1.71213	8.23016e-08
Trpm1	12.5995	1.71066	0.0102498
Extl1	31.4452	1.71005	0.0293881
Bhlhe41	899.549	1.7049	9.66808e-12
Cyp26b1	1058.19	1.7048	9.67704e-06
Gm11380	56.6062	1.70479	7.49245e-05
Adrb2	121.655	1.70447	7.18903e-11
Ell2	681.475	1.70291	1.86773e-16
Vgf	80.4861	1.70239	9.81181e-07
Mcrip2	335.853	1.70201	1.14579e-14
Il15	186.935	1.7003	3.33976e-13
NA	27.029	1.70007	9.54201e-06
Fblim1	958.475	1.69973	5.82649e-21
Pold4	1270.66	1.695	8.46819e-16
Fhdc1	1544.68	1.69323	1.73911e-35
Crlf1	353.01	1.69218	6.35384e-07
Gm11478	30.239	1.69139	0.000679537
Thpo	50.8452	1.68931	2.7116e-05
Cnbd2	352.58	1.68758	3.58839e-11
Rps6-ps1	64.5235	1.68708	1.7376e-06
Gm11127	32.618	1.68596	0.00367914
9530026P05Rik	12.097	1.68531	0.00212412
Fam189b	38.7043	1.685	0.000151857
Lrp2bp	10.0251	1.68484	0.0290847
Map3k20	2221.02	1.68469	4.08201e-33
Rps2-ps6	64.9768	1.68256	6.6314e-05
Fibin	47.2475	1.68211	0.00259332
Gm10499	78.6602	1.68128	4.54025e-09
Gm10653	235.115	1.68093	0.000386533
Nppb	446.926	1.68088	4.78036e-05
Rpl21-ps15	1077.51	1.68013	4.58915e-06
Hmcn2	50.9119	1.67914	0.0178479
Lnx1	47.5047	1.67545	0.00145025
Bscl2	225.836	1.67534	1.64082e-10
Gm26810	8.92496	1.67527	0.041886
Fzd6	270.123	1.67506	1.59195e-16
Aldh1a7	739.24	1.67216	0.0016638
Recql4	294.08	1.67118	1.30572e-05
Gm7334	682.963	1.66703	1.224e-32
Gm15541	42.6485	1.6662	2.60019e-06
Gm11331	59.2267	1.66518	0.0119517
Plk2	10524.6	1.66066	2.45444e-30
Gm5822	14.5937	1.66043	0.0196502
Rpl23a-ps3	79.4766	1.65922	0.000118382
Lrrc71	28.9812	1.65893	0.00994512
Zfp811	11.9502	1.65831	0.00644021
Ces1g	19.455	1.65822	0.0241614
Mtfr2	211.422	1.65808	4.20725e-05
Fstl3	1713.82	1.6562	3.63761e-15
Plekha7	19.497	1.65455	0.0122818
Kifc1	820.52	1.65445	2.06535e-08
Dusp4	2570.48	1.65175	2.44241e-08
Rras2	2707.73	1.65133	2.61405e-18
Cgref1	204.551	1.6512	1.07793e-10
Gm9806	17.386	1.64845	0.0231536
Dkk2	170.648	1.64547	0.0346361
Gm4204	1280.22	1.64095	1.29733e-14
2310061I04Rik	1207.43	1.64011	1.51782e-19
Gm6969	2684.56	1.63932	6.0797e-14
Unc13d	41.0409	1.63896	8.88431e-06
1810032O08Rik	226.283	1.63755	2.18944e-14
Snord37	16.5197	1.63541	0.00507472
Slc7a5	7418.66	1.63123	1.54827e-06
4933430I17Rik	27.1512	1.62994	3.96815e-05
Cd53	21.1945	1.62772	0.0220561
Gm6736	924.298	1.62547	7.69571e-06
Jsrp1	11.6042	1.62485	0.0257976
Fgf11	9.95973	1.62457	0.0124372
Cenpw	161.258	1.6241	6.55271e-09
Snrnp48	727.375	1.62408	2.41318e-21
Rps2	1054.56	1.62067	1.59196e-17
Gm10029	43.05	1.61992	0.00468474
Gm10420	383.052	1.61524	2.05718e-10
Il15ra	123.638	1.61498	6.89549e-06
Inafm2	1281.57	1.61448	2.7726e-54
Slc39a10	3524.38	1.61339	1.57301e-11
Igf2bp1	2960.66	1.61161	3.24689e-59
Scarf1	6.60856	1.61135	0.0477475
E2f6	108.696	1.60993	4.298e-11
NA	10.0591	1.60873	0.0421324
Itga6	3086.58	1.60861	1.12204e-24
Ripply1	17.4089	1.60798	0.0322573
Ccdc163	481.253	1.60727	6.37474e-10
2900052L18Rik	59.7045	1.60713	3.02416e-07
Gm13573	14.3168	1.60703	0.0199521
Prdx6	12709.3	1.60649	5.76525e-17
Rhbdl1	40.6676	1.60538	0.000407676
Kcnj15	706.135	1.60507	1.59998e-05
Ttc41	109.454	1.60226	4.76589e-07
Pcgf5	1180.44	1.60222	1.15134e-29
NA	737.341	1.60161	3.06745e-18
Aen	3318.37	1.60098	2.8065e-16
Plk3	880.618	1.60083	1.22215e-22
Chd5	78.1594	1.59993	0.000951243
Gm27913	37.9961	1.59801	1.06941e-05
Ica1	26.0975	1.598	0.0163296
Gtpbp2	2282.05	1.5953	2.43157e-32
Slco2a1	4121.36	1.59492	6.89485e-20
Ezr	2125.96	1.59415	5.88409e-29
Amotl2	15490.2	1.59189	2.94663e-18
Fau	8902.56	1.59069	1.64008e-13
Eno3	744.512	1.59034	2.19582e-07
Nop53	8144.38	1.59027	3.01879e-11
Kcnab3	152.166	1.58899	1.98174e-08
4932414N04Rik	12.4576	1.58889	0.0108103
Ptprj	72.0627	1.58704	0.0033971
Dbil5	14.3152	1.58631	0.0137552
Apol9a	154.793	1.58379	8.57039e-06
Dusp9	278.676	1.58263	2.71211e-07
Rack1	120397	1.58156	7.4946e-15
Pde8b	714.994	1.58115	1.44647e-12
Me3	835.395	1.58096	3.51383e-21
Hspa4l	3271.54	1.58039	1.63707e-10
Cpxm1	32.083	1.57929	6.96059e-05
Diras2	135.873	1.57816	9.31175e-05
Rpsa-ps9	649.6	1.57772	6.4386e-08
Nmnat3	174.672	1.57607	1.26915e-11
Tmem63c	11.0959	1.57605	0.00810302
Gm13083	9.70568	1.57603	0.0405935
Odc1	6015.14	1.57553	1.46367e-29
Hsd3b3	12.4794	1.57549	0.0149314
Rnf169	1270.19	1.57533	1.02672e-17
Flrt2	1425.86	1.57298	3.57869e-09
Apold1	41.2477	1.57233	1.72423e-05
Gm15559	33.9714	1.57134	0.000182295
Aif1	20.8762	1.57079	0.000539232
Egln3	507.425	1.56792	5.46149e-16
Cdkn2d	517.371	1.56716	1.34388e-09
Prrg2	490.591	1.56481	8.14804e-11
Gdpd5	258.317	1.56416	2.29218e-17
Gsta1	191.607	1.56369	0.000324382
Thy1	3489.69	1.56356	1.08602e-13
Rps27a-ps2	26.3974	1.56232	0.0117141
Pvr	3501.59	1.56156	1.40712e-17
Pttg1	1028.15	1.55865	7.70798e-10
Selenoh	777.659	1.55843	1.40782e-15
Plekha2	266.083	1.55789	1.63192e-06
Lncenc1	53.164	1.55786	0.000110254
Gm13226	135.786	1.55723	1.54538e-07
Gm6139	18.0661	1.55626	0.0306787
Acyp2	175.948	1.5549	8.72517e-19
Veph1	84.6208	1.5535	0.00351991
Gm5805	361.4	1.55303	6.29024e-06
Txnip	34226	1.55296	0.00183196
Hid1	87.3926	1.55278	4.2837e-05
Slc19a2	1917.48	1.55195	2.66424e-25
Gm15793	214.717	1.55155	7.33773e-07
Gm16174	11.3703	1.5513	0.00660399
Loxl4	984.285	1.55069	2.58114e-09
Gm26510	11.3075	1.55068	0.0297077
Tmem169	34.2399	1.54938	0.000421931
Tmcc3	374.235	1.54799	1.49266e-09
Junb	1589.77	1.54734	1.41931e-06
Pmm1	3567.22	1.54658	7.62299e-17
Ehd1	9278.79	1.54543	6.81174e-17
Mettl21e	9.7712	1.54504	0.0225523
Gm10247	32.7554	1.54493	0.000342135
Hmgcll1	8.89719	1.5435	0.0492094
Tcaf2	513.739	1.54318	1.0656e-10
Gstm6	8.21389	1.54317	0.0470574
Rpl8	66813.6	1.54101	1.30272e-19
Papss2	2566.38	1.54079	7.91523e-24
Glul	897.371	1.54039	5.65172e-09
Gm13632	65.5249	1.53893	2.68156e-08
Uhrf1bp1l	3287.03	1.53819	2.75757e-43
Rb1	846.903	1.5366	4.96659e-19
Tpx2	3448.02	1.53423	4.80757e-07
Dnah6	60.0058	1.53411	0.000207432
Rpl18	36466.2	1.5316	2.22838e-17
Itpkc	1053.76	1.53156	1.02244e-12
Gm11249	1092.35	1.52989	6.61355e-08
Lysmd1	338.131	1.52965	2.88572e-20
Disp1	2262.13	1.52831	1.06659e-47
Col11a2	157.356	1.52765	8.24298e-05
NA	1727.99	1.52723	0.00250442
Rpl28-ps1	40054.7	1.52612	2.33199e-12
Atf7ip2	31.7953	1.52553	0.0363214
Trim12a	37.332	1.52532	0.000278129
Fbln1	65.6633	1.52485	0.00241121
NA	2233.7	1.52345	1.23599e-12
Gm15708	52.2114	1.52154	7.45752e-05
Tec	115.056	1.52101	2.42586e-10
Gm8623	21.7566	1.51949	0.0122432
Stx11	348.399	1.51909	2.13771e-18
Acot2	886.342	1.51769	2.54884e-15
Abcg4	19.2543	1.51538	0.00659428
Gm11599	19.4868	1.51515	0.0120951
Rpsa-ps11	28.0966	1.51353	0.0115907
Cyp2t4	9.34375	1.51166	0.0204518
Gm10275	71607.8	1.51086	1.52177e-12
Wdr45	2171.77	1.5099	1.77568e-20
Oxr1	3434	1.50944	1.47107e-09
Cfap100	434.407	1.50914	1.66386e-08
Tspan33	25.3226	1.50905	0.00519399
Gm6169	8.70969	1.50868	0.0407126
Sh2d6	55.4154	1.50839	0.000117122
Esd	14951.2	1.50652	1.66048e-17
Ap2a2	11186.2	1.50556	2.01189e-32
Rps2-ps10	66192	1.50523	1.33596e-22
Slc22a4	48.5266	1.50326	0.00105191
Isg15	100.302	1.50303	5.74538e-07
Ak1	2929.21	1.50259	2.93562e-27
Oplah	158.757	1.50251	7.98167e-08
Klf10	2846.2	1.50221	3.52909e-07
Rps6-ps4	132833	1.50078	3.06387e-15
Sp2	1110.54	1.50011	1.00543e-12
NA	329.905	1.50008	2.10579e-07
A630031M04Rik	11.4203	1.49958	0.0250565
Rusc2	4030.03	1.49894	2.48619e-10
Col28a1	133.4	1.49768	7.55752e-05
Msh5	95.2616	1.49539	8.76248e-05
Gm16364	22.2522	1.49399	0.000744044
Acy3	101.983	1.49191	1.03332e-07
Stard13	1677	1.49178	2.22801e-06
9130008F23Rik	333.961	1.49158	6.13997e-12
Cyp39a1	736.973	1.48978	1.03046e-30
4933427I04Rik	39.5447	1.48871	0.000149822
Cav2	3663.33	1.48768	5.47267e-17
Noc2l	3844.88	1.48735	9.63708e-31
Paqr3	356.34	1.48577	2.84654e-16
Dot1l	2904.51	1.48213	4.1715e-21
Arl14ep	4362.34	1.48207	5.61955e-17
Rnf114	2517.37	1.48168	7.47918e-14
Ercc6l2	120.823	1.48131	7.55813e-07
1700028J19Rik	26.7202	1.4809	0.00127424
Gm11824	14.1212	1.47907	0.0288119
Zfp286os	14.2589	1.47542	0.0101604
Gm9493	223.723	1.47219	5.16735e-05
Rpsa	106522	1.47085	2.98054e-15
Wincr1	360.43	1.47083	6.20137e-06
Prorsd1	28.6761	1.47067	0.00251938
Rps12-ps1	89.8586	1.46981	2.24982e-06
Col4a5	13744.7	1.46912	1.84269e-31
NA	58.6889	1.46883	3.08283e-05
Abcc1	6563.18	1.46755	1.1381e-31
Hspbap1	670.334	1.467	4.88752e-27
Trmt10a	1090.23	1.4663	3.63211e-17
Rps15	55482.9	1.46584	1.73656e-12
Usp3	2309.15	1.46527	6.60644e-12
Slco3a1	1020.79	1.46423	1.97078e-15
Fcer2a	17.19	1.46233	0.00347797
Gm26686	46.3167	1.46094	0.000186048
Gm19705	81.4969	1.45856	1.65044e-06
Prelp	2798.88	1.45755	0.00194938
Rpl17-ps10	39.5528	1.45659	0.00763907
Gm16409	267.078	1.45567	6.60891e-06
Gm14149	106.278	1.45529	8.82351e-11
Rpl9-ps6	49.2128	1.45434	0.0214054
Rpsa-ps5	10.0369	1.45353	0.0493426
Klrg2	65.682	1.45214	6.27101e-06
Zhx2	795.621	1.45185	5.04938e-12
Hsf2bp	28.1603	1.44928	0.0060691
BC022960	75.2846	1.44912	1.36543e-05
Clk3	1992.49	1.44894	5.98477e-19
Gm9855	2483.95	1.44889	5.99847e-34
Eif3d	11371.2	1.44852	2.7478e-18
Arrb2	918.812	1.44794	2.60785e-17
Zmat3	4898.11	1.44731	3.44074e-21
Rgl3	384.48	1.44723	5.31068e-19
Jmjd7	318.036	1.44622	2.59932e-11
Gm16201	31.2809	1.44571	0.00178806
Rps16	14597.3	1.44487	2.28268e-15
Specc1	3432.28	1.44445	1.13934e-15
Rpl17-ps4	69.9664	1.4428	0.000145549
Por	4956.62	1.4414	1.68994e-14
Lmcd1	190.966	1.44133	0.00169201
Rps3	56649	1.44005	1.83244e-13
Mamstr	61.7393	1.43931	0.020733
Rps6-ps3	125.057	1.43855	1.51008e-06
Crim1	4958.72	1.43759	2.15764e-10
Necab3	62.9227	1.43664	0.00163832
Yjefn3	129.027	1.43595	1.78958e-06
2019-09-05	7626.58	1.43415	6.58393e-17
Whamm	496.75	1.43328	3.17534e-12
Rhox5	444.766	1.43254	3.91888e-07
Kcmf1	5176.9	1.43073	1.26381e-38
Gm10036	36.6804	1.42949	0.000804735
Ttc16	24.8797	1.42911	0.00551757
Gm4968	86.2847	1.42907	1.03387e-05
Gm7367	116.35	1.42905	0.00870464
Gm11518	16388.7	1.42839	8.71356e-18
Rdh12	38.3277	1.42763	2.9817e-05
Gm26651	25.6122	1.42746	0.0451718
Ndufaf6	307.056	1.4274	1.13759e-12
Hcfc1r1	8234.32	1.42718	6.75587e-11
Gm14494	1272.81	1.4269	3.42158e-08
Hagh	1322.18	1.42659	2.1541e-25
Abca5	1770.48	1.42648	3.85833e-11
Mknk2	5451.66	1.42558	1.65556e-11
Gm15264	33.1505	1.42544	0.00297953
Wfikkn1	16.6228	1.42544	0.00435947
Gm12242	18.901	1.42474	0.0223337
Agpat4	1161.53	1.42471	3.09918e-18
Ldb3	22.1342	1.42293	0.0364058
Cxcl5	153.653	1.42264	0.000487173
Gm15050	189.902	1.42204	5.60111e-11
Guca1a	12.2852	1.42193	0.0208979
Chfr	2461.95	1.42087	5.47854e-17
Prss53	73.1378	1.42085	4.05693e-05
Ctc1	2558.24	1.42068	2.2084e-08
Grip2	30.0839	1.42039	0.0354993
Tmem43	6334.66	1.41963	6.81562e-13
Pqlc3	1007.22	1.4195	4.43213e-18
Rpl13	43964.5	1.41913	1.52529e-11
2610206C17Rik	15.8747	1.41717	0.0246708
Gm10020	173.495	1.41655	7.34111e-06
Mllt3	4797.05	1.41589	1.21405e-17
Strbp	1590.73	1.4146	5.8827e-19
Rps2-ps13	65962.3	1.41228	6.78681e-20
4933438K21Rik	20.6102	1.41008	0.0104609
Cdc25b	1752.31	1.40995	1.84827e-10
Rpl18-ps2	29.0676	1.40934	0.00132699
Awat2	33.2016	1.4093	0.000426868
Ltc4s	33.9005	1.40846	0.0227429
Maff	1125.07	1.40833	3.57863e-08
Fermt3	34.1368	1.40714	0.000119809
Cd151	4413.73	1.40459	3.23709e-20
Cd274	79.8468	1.40222	1.03362e-07
Flrt3	33.1467	1.4021	0.0381454
Slc35e4	1871.81	1.40125	8.61733e-12
Aurka	1220.68	1.40122	0.00020272
Gm10136	300.316	1.39989	5.7211e-07
Rps26	31879.8	1.39715	2.00177e-10
Hmgn5	168.658	1.39451	0.0250323
Ifi205	92.8112	1.3932	0.0438849
Otud1	340.362	1.39082	3.66785e-10
Gfer	1246.8	1.39014	1.1782e-18
Ccser1	471.616	1.38947	1.56572e-10
Cltb	2400.27	1.38877	6.98445e-12
Exoc6	416.782	1.3875	5.22344e-12
Gm4462	7.25704	1.38708	0.0472129
Gm17315	21.5568	1.38672	0.00121768
Slc25a28	779.065	1.38468	7.12887e-17
Faah	126.524	1.38456	1.81221e-05
Gm26555	27.3662	1.38358	0.00953994
Stambpl1	1280.98	1.38354	1.87048e-14
Gm9625	405.75	1.38241	5.60764e-08
Slc25a30	2177.75	1.3823	1.1217e-12
Gm12366	374.608	1.38057	4.6633e-06
Rpl13-ps3	18.704	1.38038	0.00790978
Rpl17-ps9	231.501	1.38018	8.76569e-09
Dcxr	824.751	1.37834	9.61225e-09
Gm8213	418.509	1.37768	1.69228e-09
Pid1	12.1802	1.37741	0.0279452
Tbc1d31	1630.86	1.37727	1.60307e-09
Gm13205	30.4443	1.37691	0.000478966
Hrct1	51.6807	1.37684	0.000248463
Nuak2	683.313	1.37591	3.35907e-13
Kcna4	440.106	1.3757	3.51526e-08
Tap1	754.365	1.37558	1.03552e-11
Mapre3	1426.06	1.37462	1.93824e-12
Phactr2	110.901	1.37287	0.00100434
Rps12	48476.2	1.37276	3.61256e-18
Cox7a2l	10855	1.37226	1.84383e-10
A230060F14Rik	15.6341	1.37173	0.0215987
Gm5828	12.078	1.37172	0.031311
Gm9083	22.2364	1.3715	0.00826424
Zwilch	669.388	1.36724	1.55582e-05
C77080	1863.18	1.3672	7.93665e-24
Rpsa-ps10	455.327	1.36625	1.83251e-06
Gm7808	50.8315	1.36614	0.000128044
Gm12712	27.7637	1.36519	0.0135809
Gm16062	85	1.36491	0.000329604
Acsbg1	82.3921	1.36472	0.000343138
Dennd5b	74.3048	1.36405	0.00320732
Cct6b	24.2356	1.36398	0.0016706
NA	10.1077	1.36368	0.0345327
Usp18	22.0619	1.36219	0.00238045
Rps12-ps24	14.8171	1.36198	0.0478354
Glns-ps1	14.7089	1.36186	0.0430399
Gm7536	46411.4	1.36156	2.27457e-13
Ccdc78	27.3555	1.36154	0.00331864
Rps12-ps3	32513.2	1.36112	1.91635e-10
Gm10382	31.8708	1.35992	0.0474811
Tmbim1	4932.48	1.35762	2.11265e-20
Slc2a9	175.161	1.35746	2.00661e-10
Krt86	11.2594	1.35727	0.0329093
Adcy1	1520.54	1.3569	4.29577e-07
Phlda1	939.969	1.35557	3.18227e-07
Gm13413	64.4604	1.35498	4.86882e-06
Apaf1	2157.69	1.35396	5.11248e-20
Gm3531	19.2652	1.35365	0.0157309
Castor1	337.806	1.35119	9.26492e-14
Nabp2	2302.58	1.35071	3.03266e-17
Rpl36-ps12	66.1186	1.34967	4.13313e-05
Kif2a	2279.02	1.34953	3.16263e-23
Gm10108	146.644	1.34775	0.000582777
4921524J17Rik	641.611	1.3467	4.22834e-25
Egfr	1382.65	1.34584	4.79761e-08
Cyp4x1	10.8668	1.34561	0.0479934
Impdh1	2647.66	1.34546	1.93e-30
Gm12176	45.1795	1.34536	0.000996193
Gm10243	15969.9	1.34485	3.85236e-14
Spry1	847.992	1.34466	6.0442e-07
Rps10	48037.2	1.34464	2.00637e-11
Ifi35	678.757	1.34455	6.27654e-15
Rps16-ps2	25503.3	1.3437	2.59677e-08
Rpl27-ps1	134.872	1.34357	7.91089e-05
Rabggtb	5299.56	1.34349	2.78834e-29
Hotairm1	163.786	1.34303	1.50014e-09
Sord	8476.14	1.34259	6.61565e-08
Phkg1	37.7522	1.34197	0.00249384
Ltbp1	3648.12	1.34187	1.93048e-10
Cpox	1136.26	1.34079	3.21697e-08
Gm4294	216.037	1.34069	0.00434593
Rpl4	100332	1.34047	4.37621e-14
Slc3a2	11311.1	1.34036	1.22766e-24
Col8a1	3683.9	1.34004	1.06999e-06
Gm20900	83.4022	1.33993	0.000333821
Gimap6	24.9888	1.33912	0.000507805
Col5a3	679.716	1.33794	2.81026e-05
Aloxe3	163.782	1.33753	0.000262883
Rin1	4778.35	1.33717	2.32804e-18
Eed	1239.55	1.33695	9.60962e-25
Rps14	37307.5	1.33514	7.48996e-08
Cpne9	17.4095	1.33488	0.0359476
Sinhcaf	1136.21	1.33435	1.69704e-09
Sorbs1	833.086	1.33333	5.48514e-13
NA	5457.01	1.33311	0.000129926
Sema3c	667.71	1.33186	0.0218106
Gm10051	181.073	1.33136	0.00436188
Uck2	2613.5	1.32782	1.0813e-15
Herc3	407.835	1.32775	2.4536e-10
Cep55	681.485	1.32708	0.019716
Prr5	206.04	1.32671	7.99004e-09
Rps25	29032.2	1.32624	6.20339e-13
Wdr12	1978.77	1.3262	3.27465e-20
Cst6	60.2186	1.32532	0.00737795
Slc29a2	224.335	1.32493	1.3134e-12
Sec31b	230.927	1.32455	1.98687e-06
Rpl23a	76915.4	1.32396	4.9e-11
Rplp0-ps1	63.1055	1.32314	0.000658382
C1qtnf12	46.381	1.32124	0.000407905
Gm15427	13183.1	1.32021	9.50066e-05
Pck2	4321.41	1.31977	1.45504e-12
Gm10169	48.9051	1.31947	0.00343151
Gm6433	39.0436	1.3194	0.0104786
Rpl17	47230	1.31889	2.09578e-10
Lrwd1	1708.04	1.31834	3.22894e-14
C2cd2l	454.103	1.31797	1.64654e-07
Trim24	3746.21	1.31702	9.42794e-11
Knstrn	1791.18	1.31697	3.42338e-07
Rpl22	11046.4	1.31643	8.48224e-09
Limk2	1846.81	1.31589	1.21184e-22
Tmem63b	2442.58	1.31537	2.29658e-33
Uba52	18378.2	1.31469	1.27733e-07
Tuft1	1030.06	1.31416	6.45978e-09
Rras	2672.58	1.31412	1.10112e-10
Prdx5	5188.91	1.31399	4.12078e-20
Pbx4	103.308	1.31363	2.09824e-07
Rps26-ps1	19459.1	1.31307	3.16098e-10
Rpl9	44619	1.31262	6.65751e-14
Mfsd2b	28.2561	1.31246	0.0274826
Baz2a	4071.96	1.31144	1.54829e-68
Snhg5	748.106	1.31135	6.74793e-11
Tmem245	7288.01	1.3108	1.782e-20
Naa25	2845.12	1.30987	9.05925e-29
Rpl17-ps5	73.1036	1.30957	0.0497922
Cdk18	2832.68	1.30949	1.4622e-10
A230020J21Rik	18.8725	1.30941	0.0280609
Nomo1	5376.94	1.30898	1.3211e-11
Espnl	43.3324	1.30778	0.00127357
Gm13075	19.6946	1.3072	0.0203015
Ager	26.4151	1.30681	0.00471275
Ide	5488.79	1.30665	1.58752e-20
Rps2-ps4	80.9541	1.30609	0.0162526
Gm9828	55.4899	1.30565	1.02811e-05
Dynlt1a	769.809	1.30499	1.05537e-11
Dlgap5	995.048	1.30476	7.96639e-06
Crnde	141.72	1.30309	4.24904e-09
Gm10132	193.159	1.30279	0.000346515
Plekhn1	640.735	1.30241	8.11876e-07
Efna1	1322.87	1.30237	3.96815e-05
Gmip	1120.36	1.30225	8.71911e-13
Nrg1	1866.44	1.30213	4.08873e-14
Rpl26	50023.3	1.30211	1.34136e-14
Ifrd1	4709.93	1.30177	2.67883e-10
Pdgfa	1217.55	1.30081	2.48303e-24
Gm14438	233.544	1.30072	0.00065289
Prss36	320.862	1.29968	3.14567e-08
Lsm11	725.402	1.29964	1.63139e-12
Wdr91	824.479	1.29765	4.57313e-12
Rps19-ps6	69.442	1.29741	0.0136877
Gm26707	18.8437	1.2974	0.0122268
Zfr2	251.143	1.29738	3.12314e-07
Yaf2	830.971	1.29668	7.91305e-16
Me1	3504.25	1.29624	5.30934e-22
Eif2b2	1629.98	1.29462	4.75354e-17
Cct4	19364.5	1.29376	1.84996e-27
Rpl39-ps	200.966	1.2926	6.87242e-05
Vezt	1941.87	1.29248	8.90708e-29
Erc2	648.41	1.29222	3.70821e-13
Zfp598	2577.34	1.29168	2.19279e-28
Vps36	2824.13	1.29141	8.17274e-35
Gm26578	320.257	1.29125	4.54731e-15
Tbrg1	7943.99	1.29122	1.00193e-18
Cd24a	2574.11	1.28926	0.000429069
Gm12933	53.051	1.28912	0.007184
Rps12-ps19	164.267	1.28892	6.34425e-08
Rps27a	38338.2	1.28762	4.69043e-11
Lif	170.503	1.2864	0.00071357
Ankrd61	29.4641	1.28628	0.00468484
Fam117a	85.5209	1.28603	0.00162886
Prps1	1657.91	1.28547	4.11005e-15
Gm11808	30010.5	1.28451	3.26033e-13
Ifit3b	229.697	1.28446	0.00122393
Pvt1	2024.37	1.28407	1.95199e-19
Syn1	1096.84	1.28311	1.54076e-17
Thap4	2190.18	1.28222	3.9477e-15
Nmnat1	220.61	1.282	3.25098e-17
Rps5	42435.7	1.28167	7.90106e-09
Milr1	11.1371	1.28135	0.0448442
Col10a1	24.8955	1.28131	0.00209767
Tex26	48.2602	1.28114	0.00129052
Syne2	2077.97	1.28113	4.58718e-11
Gm5459	15.1827	1.27914	0.0498493
Ppp2r5d	4897.84	1.27904	4.6261e-19
Gpr157	124.355	1.27862	5.76944e-05
Alkbh2	215.756	1.2786	2.228e-13
Gm17828	1219.48	1.27843	6.92005e-06
Gm15772	85.3886	1.27787	0.00194374
Dhx58	52.4208	1.27746	2.45848e-05
Gm5931	88.3662	1.27544	0.00138722
Zc3h8	210.383	1.27526	8.30951e-09
Rpl15-ps3	37991.8	1.27409	1.09281e-09
Ifih1	56.9752	1.27126	0.000890626
Dvl1	2494.32	1.26947	8.38546e-22
Edn1	882.978	1.26944	4.79813e-06
Sh2d3c	108.549	1.26942	2.3097e-05
Nova2	53.8752	1.26933	0.000412489
Thap1	316.451	1.26579	2.75426e-09
Rps18	7591.72	1.26571	1.36827e-05
Gdf9	43.0307	1.26458	0.00115753
NA	56.0079	1.26323	0.00597556
Rplp2	29391.3	1.26316	1.14536e-12
Rpl24	25807.9	1.26157	2.80065e-11
Cdh3	15.5694	1.26149	0.0197211
Rpl32-ps	16.7628	1.26108	0.018824
Rab3ip	2085.05	1.26068	2.95939e-21
Gab2	872.052	1.25946	9.60726e-10
Tjp1	4773.97	1.25927	1.06183e-16
H2-Q7	211.758	1.25861	6.8626e-06
Gm6030	218.769	1.25851	0.000624941
Pnkp	1016.33	1.25835	2.11765e-15
Rps15a-ps7	44.6226	1.25766	0.00207058
Gss	1651.84	1.25669	5.34755e-11
Gm12091	282.241	1.25495	0.00045695
Trim69	27.4781	1.25415	0.00323063
NA	16.7582	1.25414	0.0470782
Lpcat4	1034.7	1.25381	3.45242e-14
1700001O22Rik	11.2302	1.253	0.0397086
Bpnt1	749.389	1.25277	3.88527e-13
Rpl18a	66237.1	1.25021	4.0293e-08
Il18rap	98.6017	1.24969	0.000368705
Gm9726	134.082	1.24917	6.10743e-05
Mfrp	16.5064	1.2487	0.0344204
Gm9396	66.4315	1.24787	0.00134433
Igfbp6	10099.9	1.24683	1.53395e-10
Paip2b	3971.74	1.24529	5.39929e-15
Rpl28	2509.81	1.24507	1.27296e-05
Oxsr1	2997.3	1.24502	1.15726e-23
Ifi47	69.2341	1.24467	8.31309e-07
Sesn2	1711.21	1.24382	1.54537e-12
Pgpep1	2247.35	1.24273	5.92128e-18
Rps7	10325	1.24219	2.40939e-07
Dst	14726.7	1.24205	1.2808e-12
Anln	4893.27	1.24021	0.000698826
Gstt1	157.094	1.24013	0.00229073
Dqx1	97.9924	1.23975	9.54412e-06
Adipor1	9075.21	1.23966	3.81037e-14
Kctd13	656.92	1.23888	1.34139e-08
Per3	660.466	1.23748	4.62431e-09
Arvcf	1255.27	1.23727	7.27407e-17
Rpl35	28922.3	1.23689	1.14236e-13
Sphk1	627.953	1.23638	6.93515e-05
Rpl10a-ps1	49044.2	1.23616	5.31072e-09
Rps6ka5	321.241	1.23609	3.32655e-10
Gm20683	64.0041	1.23588	0.014591
Mif	7576.74	1.23581	1.78715e-10
Mme	42.6056	1.23489	0.0248676
Serpina9	31.4217	1.233	0.0222963
Dpm1	807.445	1.23204	2.86113e-07
Creb3l4	51.9795	1.23154	4.97708e-05
Zfp972	96.73	1.22903	6.20517e-05
Gm8116	1189.5	1.22781	1.68417e-31
Ptges	1888.1	1.22774	2.93535e-09
2310022A10Rik	765.783	1.22712	1.47064e-12
Ifi213	21.2848	1.22694	0.0144871
Mcu	1703.92	1.22621	4.05419e-28
Gm13456	238.448	1.22567	2.47729e-05
Fam220a	353.537	1.22536	0.0120659
Mroh2a	196.706	1.22524	0.00146309
Rps23	23042	1.22473	2.95158e-07
Zfpm1	851.748	1.22465	8.88702e-12
Pla2g4a	4766.45	1.22417	7.12951e-05
Rps25-ps1	24.6607	1.22368	0.0232114
Cdc34	2896.49	1.22307	5.29137e-13
Gm10335	326.993	1.22196	0.00165758
Schip1	526.864	1.22141	1.55571e-13
Isg20	692.621	1.2211	2.76035e-08
Glis2	2505.63	1.22047	8.27228e-19
Rpl27	2340.73	1.22045	6.37023e-07
Arhgap33	330.241	1.2201	2.99568e-07
Mttp	478.464	1.21972	3.10966e-23
6430562O15Rik	12.1798	1.21922	0.0320633
Cs	17852.7	1.21907	2.1515e-17
Htra1	323.733	1.21898	1.29473e-13
Lamb2	7100.08	1.21867	5.1497e-08
Dmtn	35.7838	1.21847	0.00365929
Cav1	38978.1	1.2184	6.93003e-22
Irf2bpl	2111.47	1.21778	4.12375e-19
Cdc20	2852.26	1.21768	0.00023151
Primpol	719.497	1.21706	1.24093e-18
Srp72	10229	1.21669	6.44739e-17
Nectin1	1412.4	1.21646	7.99254e-12
Stim1	2475.82	1.21588	5.04192e-15
Usp17la	30.3176	1.21535	0.0157003
Hspa5	48769.3	1.21455	1.2789e-07
Rplp0	148996	1.21453	3.47649e-12
Gm12922	36.5244	1.2145	0.0139271
Pdlim7	2855.18	1.2145	4.15005e-14
Spsb1	515.999	1.21409	5.19221e-15
Rpl15	5028.83	1.2135	1.66334e-13
Fam107b	3625.92	1.21252	5.72165e-12
Sap18b	2815.51	1.21067	1.23039e-20
2010015M23Rik	28.6583	1.20936	0.0213869
Mras	3862.45	1.20859	1.09166e-11
Gm15500	76446	1.20784	2.38491e-10
Ube2cbp	39.2823	1.2075	0.00257608
Pik3cb	1633.02	1.20704	8.53273e-13
Cdh2	5735.01	1.20593	1.14579e-14
Mss51	56.3204	1.20558	3.3669e-05
Retreg1	1973.38	1.20525	7.52331e-11
Cit	699.307	1.20501	0.000918524
Ccdc9b	3998.15	1.20461	1.90684e-21
C9orf72	868.87	1.20422	2.75757e-43
Gm5526	15.9332	1.20387	0.0297946
Dele1	1859.41	1.20267	2.48491e-10
Fitm2	1939.48	1.20237	3.91375e-12
Nr4a1	921.089	1.20225	0.00424844
Sbds	2941.88	1.20116	1.29683e-21
Ctps	9423.68	1.20073	2.08455e-12
Bex3	8754.03	1.2003	4.58087e-24
Gm2000	6602.44	1.19895	1.41931e-06
Gm9843	23508.3	1.19893	8.92664e-09
Ubxn1	7751.98	1.19753	3.42052e-25
Cox6a2	24.8909	1.19734	0.0354811
Thoc6	1074.78	1.1965	1.9804e-14
Sqor	2866.17	1.19513	8.14443e-22
Gm28042	211.213	1.19419	0.000203083
Gm5121	57.7777	1.19391	0.00822586
Mrps31	966.283	1.19328	8.36283e-12
Plpp2	931.329	1.1927	7.21189e-14
Grb14	1511.86	1.19207	1.03148e-06
Ier3	749.798	1.19154	2.36134e-06
Tpd52	282.175	1.19136	1.12293e-05
Serpini1	53.6256	1.19106	0.000812274
Gm10260	27463.1	1.1901	1.69521e-09
Mthfd2	2675.16	1.18946	0.000239115
Rpl30	7654.74	1.18921	7.16079e-13
Ska1	241.124	1.18854	0.00580132
Tmem170	255.305	1.18823	5.11423e-12
Gm10040	874.67	1.18812	2.85919e-20
Rpl3-ps2	54.6102	1.18764	0.00519413
Gm10602	148.956	1.18698	5.97633e-10
Rps19	31869.8	1.18697	1.10866e-08
Gm13421	26.55	1.18663	0.0162541
Ccl9	880.619	1.18625	0.00215961
Flnc	35973.8	1.18604	1.05401e-11
Wdr36	2910.01	1.18583	4.31181e-25
4930458D05Rik	61.1937	1.18575	0.00495127
Reep4	971.131	1.18536	9.6247e-09
Zfp354a	365.423	1.18532	5.3837e-07
Gk	712.742	1.18516	2.82731e-06
Dgka	489.676	1.18475	1.69644e-11
Rasl11b	155.403	1.18302	0.000148417
Tcirg1	2505.67	1.18213	2.24881e-12
2810025M15Rik	454.551	1.18121	8.43417e-10
Aldh18a1	7021.69	1.18033	4.7301e-11
Cenpv	267.479	1.18031	5.8939e-09
Tbc1d2	1016.92	1.17986	4.28565e-07
Prpf40b	1411.84	1.17986	7.80914e-11
Adarb2	76.9727	1.17963	0.00820218
Rpl37rt	7114.7	1.17931	1.40131e-10
Susd6	4237.93	1.17925	9.57003e-09
Mpp6	1620.76	1.1789	5.98879e-07
Gm8730	13578.6	1.1789	6.52158e-09
Gm7331	343.421	1.17804	0.00283759
Eef1b2	46128.2	1.17706	6.14593e-11
Zfpm2	579.748	1.17651	1.10731e-10
Rpl32	65196.3	1.1761	3.64593e-09
Trim36	26.6235	1.17606	0.0258908
Lrrn4cl	2335.88	1.17596	0.000174851
Gramd1a	2969.75	1.17552	2.95158e-07
Zfp335	1805.27	1.1755	6.09153e-11
Rbm38	607.993	1.17515	1.15287e-05
Ipo5	14120.8	1.175	3.1503e-19
Utp4	3049.02	1.17433	1.5988e-16
Esyt1	2873.96	1.17333	6.32759e-19
Mrpl32	969.424	1.17322	1.13737e-21
Nr1h5	425.424	1.1728	0.0216002
Rpl38-ps2	415.238	1.17248	0.0174537
Bcorl1	1056.98	1.17201	9.88651e-10
Gm13864	254.082	1.17116	1.54914e-05
Rpl19	61202.7	1.17081	4.12449e-09
Ccdc107	815.764	1.17028	2.40971e-19
Fbxo47	20.0265	1.17012	0.030213
Pif1	283.187	1.16999	0.00436685
Ghitm	11802.3	1.16811	4.16404e-17
Tmem240	41.6844	1.16753	0.0177508
Esrra	994.425	1.16732	4.93538e-09
Rpl36	15843.8	1.16555	5.95084e-09
Myl6b	236.337	1.16489	6.59107e-07
Rpl35a	516.715	1.16471	5.16795e-09
Slc38a9	414.905	1.16384	8.84976e-13
Faf1	5358.73	1.16378	8.34411e-23
Grsf1	4328.91	1.16249	1.52792e-18
Zc2hc1c	99.2364	1.16239	8.67107e-05
Cmip	3604.49	1.16115	5.74485e-19
Abcb6	523.639	1.16097	4.7587e-10
Cacnb4	40.6066	1.15931	0.0452262
Rpl6	74724	1.15877	2.19312e-10
Rps19-ps2	57.1087	1.15737	0.00923516
Gabpb1	1205.66	1.15686	2.83308e-19
Gm7027	42.1672	1.15659	0.000589221
Rtp4	57.7206	1.15599	1.31472e-05
Synpo2l	127.413	1.15598	0.0441631
Tkt	7929.85	1.1555	1.8975e-15
Gm12918	11988.4	1.1553	0.000766538
Prex2	704.514	1.15476	8.16375e-05
Dcbld2	3824.81	1.15372	4.18275e-11
Lat2	39.6941	1.1523	0.0055335
Rpl11	26732.1	1.1522	1.48118e-10
Snx15	878.822	1.152	9.4863e-32
Chchd5	838.866	1.15151	4.87631e-08
Gm6472	47311.2	1.15148	2.06429e-09
Wdr89	406.734	1.15132	0.000195346
Nob1	1945.87	1.14939	8.88696e-22
Etfbkmt	562.628	1.14913	6.70474e-07
Gm5786	119.656	1.14909	6.37587e-06
Fxr2	4780.18	1.14856	7.3852e-14
Gm13841	29018.9	1.14846	4.49951e-09
Tm4sf1	4004.71	1.14836	8.26588e-10
Gm11353	146.276	1.14558	0.000962592
Rpl3-ps1	93867.3	1.14503	4.22388e-09
Bcl2l1	4294	1.14473	1.41832e-12
Pde4b	1859.32	1.14362	0.000225205
Gm8172	44.9062	1.14362	0.0045355
Lyz2	828.236	1.14328	0.0250316
Higd2a	2214.02	1.14298	6.12981e-16
Nkiras2	1742.75	1.14	1.54852e-09
4930558J18Rik	24.7967	1.13971	0.0331264
Oas1b	52.6182	1.13889	0.00234096
Tpk1	262.273	1.13861	2.82769e-10
Sik1	2788.49	1.13776	9.30532e-06
Gm6177	33.6947	1.13735	0.0320431
Ska3	318.644	1.13718	0.000284859
Neurl1a	101.678	1.13654	0.000152676
Pycr2	1798.03	1.13598	3.26923e-16
Zyx	23862	1.13573	5.86035e-22
Gm3362	137.066	1.13501	0.000278328
Ccdc80	6478.72	1.13478	7.25191e-06
Grik5	256.858	1.13469	8.80561e-08
Tarsl2	774.445	1.13413	6.52256e-22
Eef1a1	672250	1.13395	2.40937e-08
Tnfrsf22	1190.81	1.13385	3.91888e-07
Rpl14	39168.8	1.13372	2.60168e-07
NA	127.646	1.13354	5.07932e-05
Afmid	240.574	1.13353	9.88594e-06
Rpl10	12459.8	1.13351	3.73995e-06
Adprm	564.479	1.13301	4.90436e-14
Prc1	2935.88	1.13197	0.00056621
Usp30	1743.1	1.13196	5.57282e-11
Nupr1	2029.05	1.13028	1.2239e-05
Gga3	928.529	1.12979	1.01351e-09
Glrx3	6612.61	1.12971	2.96906e-15
Nfkb2	5751.41	1.12876	5.33707e-11
Gm15542	49.2818	1.12874	0.0153779
Adora2b	955.538	1.12788	1.92528e-09
Csnk1e	4058.99	1.12775	7.91888e-26
Amacr	720.34	1.12758	1.98665e-11
Gm11449	50.6793	1.12758	0.0486507
Psat1	15457.8	1.12736	0.000147391
Cntnap1	62.9968	1.12672	0.000194916
Gm6767	22.917	1.12651	0.0370838
Atxn2l	6670.12	1.12637	1.34305e-21
Cdiptos	63.1405	1.12509	0.00210503
Zfat	598.196	1.12499	8.5247e-07
Klhl26	2008.49	1.12468	1.67697e-18
Rplp1	72292.2	1.12361	1.63877e-08
Sgtb	669.205	1.12273	1.03655e-13
Gm21817	26.912	1.12043	0.010639
Gm11687	35.3526	1.12024	0.0091704
Clcn3	952.431	1.11978	1.72724e-05
AU020206	146.36	1.11803	2.41323e-11
Gm10076	56.0716	1.117	0.00236453
Lats2	3075.23	1.11675	9.85193e-15
Dlgap4	3400.88	1.11666	1.44075e-09
Rpl38	13527.7	1.11641	2.97794e-09
Baiap2l1	282.535	1.11632	6.60493e-05
Gm26694	109.43	1.11611	0.000342663
Clic4	7974.14	1.11571	5.66809e-10
Bax	4107.2	1.11459	4.16406e-12
Synpo2	219.909	1.11261	5.70053e-05
Cyb5r1	3302.74	1.11208	1.97567e-06
Gm26909	21.6103	1.11181	0.0127561
Gm12599	17.2421	1.11054	0.0427087
Eif4ebp1	7809.69	1.11004	1.53311e-16
Klf7	2129.13	1.10857	3.64722e-11
Fez2	3426.09	1.10822	3.75761e-10
Vpreb1	24.2958	1.10732	0.0149915
Napb	476.588	1.10678	4.65982e-12
Fam110c	419.383	1.10669	5.71702e-07
Fosl1	1007.4	1.10621	0.00066447
Tmpo	7007.13	1.10604	4.77926e-10
Podnl1	3817.28	1.10568	2.98462e-11
Cpt1c	488.929	1.10559	2.01549e-15
Rpl19-ps11	96.0583	1.10556	0.00873177
Tmem209	1826	1.10482	3.91005e-17
Ptcd2	866.164	1.10465	2.65852e-18
S100a11	28004.5	1.10456	4.8409e-07
Rnf31	992.472	1.10424	2.03325e-08
Platr20	22.754	1.10374	0.0315767
Ube2g2	3636.51	1.10361	4.58739e-10
NA	8103.2	1.10313	7.54643e-09
Sh3bp1	1826.72	1.10301	6.25332e-14
Gm9013	38.9956	1.10292	0.0157518
Tsen54	797.312	1.1019	1.54778e-12
Mak16	2982.45	1.09989	8.15713e-17
Ddx11	404.973	1.09932	0.000343365
Traf2	1462.06	1.09894	2.93741e-08
Rpl41	80605.6	1.09877	1.13315e-07
Lrrc1	506.016	1.09748	2.88319e-10
Rps11	38460.8	1.09628	9.92083e-09
Cdc42ep3	3187.14	1.09621	7.98002e-15
Gm17638	49.7164	1.0962	6.91741e-05
Gm20517	50.8354	1.09585	0.00041735
Efnb3	30.2923	1.09557	0.00698265
Rpl34-ps1	26643	1.09511	5.28083e-09
Slc5a5	16.0311	1.09471	0.0362299
Brsk1	879.023	1.09397	4.22844e-10
Ccnb1	1707.03	1.09396	0.00279259
Pxdc1	198.417	1.09334	2.52671e-06
Psmd8	7697.48	1.09296	1.24328e-08
Gm16477	34.2426	1.09118	0.00124225
Ube2t	295.388	1.09021	0.00225005
Prdm15	720.488	1.09016	2.06935e-08
Klf11	571.759	1.09011	6.04685e-05
Rpl7a-ps11	16425.8	1.08955	5.11085e-08
Mapk8ip3	4942.51	1.08909	8.89408e-12
Rpp30	619.708	1.08896	4.06574e-11
Slc25a39	8371.76	1.0887	4.23856e-11
Grk2	3292.24	1.08661	9.87188e-21
Pef1	4262.68	1.08647	3.19036e-09
NA	1282.24	1.08633	0.00014408
Tnpo2	9752.2	1.08393	2.89326e-14
Lrrc8e	165.339	1.08235	2.89345e-06
Steap2	5089.31	1.0821	1.0391e-07
Cxxc5	218.834	1.08193	5.21147e-06
AA467197	26.5667	1.08124	0.025643
Fam198b	10855.8	1.08028	1.91802e-06
Rpl30-ps10	596.15	1.0796	0.0153105
Pcdh1	2459.62	1.07916	1.83114e-12
Gm6451	47.4037	1.07779	0.0249763
Rpl31-ps11	31.7754	1.07695	0.0150095
Clcn2	458.109	1.07663	3.3361e-10
Sik3	2887.66	1.07653	2.87722e-14
Rps20	53567.4	1.07581	5.05437e-07
Pam16	808.404	1.07575	1.04027e-16
3110009E18Rik	177.724	1.07523	0.000537332
Eif3h	21120	1.0751	3.89083e-07
Ints12	1233.99	1.07469	2.22313e-09
Zfp809	553.77	1.07448	5.81744e-09
Gm14226	33.8681	1.07392	0.00278051
Col11a1	3443.82	1.07364	0.0343083
Gm1840	48.6925	1.07364	0.0137068
Rcc1	1466.07	1.07362	3.71003e-08
Naa16	558.341	1.0735	6.06767e-10
Tbpl1	1549.16	1.07279	2.13092e-24
1190002N15Rik	866.503	1.07266	4.73985e-07
Ptgis	3691.45	1.072	6.62652e-06
Mybl1	202.101	1.07131	0.0204013
Hspb11	1261.44	1.07117	1.31659e-09
Ttc1	1980.79	1.07086	2.63736e-15
Rpl37	20885.3	1.07078	2.68121e-08
Troap	510.259	1.07031	0.00750583
Dlg4	3652.12	1.06972	5.43316e-13
Dusp11	7910.27	1.0689	7.75183e-12
Gm14633	22.7927	1.06848	0.031482
Nans	1668.58	1.06774	4.988e-09
Gm15501	77795.4	1.06746	1.60853e-08
Lzic	586.74	1.06712	9.88651e-10
Prkd1	1467.09	1.067	4.57519e-17
Tbc1d8	59.184	1.06651	0.000303103
A330069E16Rik	17.5809	1.06497	0.0427087
Pithd1	813.319	1.0646	1.10746e-09
2019-09-04	46.9701	1.06415	0.0208854
Spag5	1260.81	1.06402	0.00384029
Gm5879	60.469	1.06266	0.0421458
Kif5a	70.9254	1.06261	0.0120843
Nosip	1483.98	1.06256	6.01493e-12
Prkg1	134.489	1.0623	0.00300362
Pitpnm1	3326.04	1.06213	9.22382e-24
Mical1	409.283	1.06188	5.58814e-08
Shmt2	7386.88	1.06047	8.89657e-05
Lin37	543.541	1.05908	1.33092e-08
Heca	1189.44	1.05879	3.02948e-11
Map3k13	64.7495	1.05808	0.0001112
Ifit1bl2	54.3037	1.05705	0.0047009
Chp1	6682.07	1.05654	1.30725e-09
Actn3	77.2079	1.05648	0.000493843
Magohb	625.362	1.05621	8.88981e-06
Gm16982	30.2646	1.0556	0.0109365
Gm7488	1833.11	1.05556	4.65993e-16
Adss	4524.18	1.05447	5.08324e-19
Zcwpw2	14.8034	1.05425	0.0350738
Rps8	13664.6	1.05417	1.6496e-06
Amn1	462.951	1.05397	2.84725e-07
NA	140.032	1.05335	6.3443e-08
Rpl7a	25955.2	1.05319	9.55931e-08
Fhl2	3219.08	1.05298	2.06419e-11
Mnd1	246.532	1.05279	1.46276e-09
Grhl1	28.3021	1.05204	0.00921665
Gcnt2	266.778	1.05197	1.70897e-05
Ticam1	1747.62	1.05174	2.27435e-06
Pycr1	948.375	1.05102	8.47066e-05
Gm26703	14.1511	1.04833	0.0424421
Gm26619	12811.5	1.04805	4.33988e-05
Aldh1l2	7819.79	1.04741	1.92798e-05
Fip1l1	6051.92	1.04736	3.53942e-09
Elp6	429.594	1.04706	4.11963e-08
Gm20628	35.3135	1.04679	0.0331417
Gm6436	10382.7	1.04661	5.68673e-06
Ptpn14	6806.86	1.0465	2.16436e-24
Dlgap1	42.7282	1.04648	0.0112688
Gm14427	29.0327	1.04538	0.0300774
Map6	3232.03	1.04513	9.91335e-09
Lurap1l	1882.94	1.04487	5.60355e-11
Atp1a1	13088.3	1.04414	3.95875e-12
Eif3i	12035.1	1.04392	9.60726e-10
Rps15a-ps3	65.5614	1.0433	0.00114148
Emd	2493.99	1.0415	2.87464e-11
Gas5	17534.6	1.04095	3.76074e-06
Usp36	1623.51	1.04061	1.92985e-09
Pa2g4	8738.52	1.03965	8.59845e-10
A130014A01Rik	79.0835	1.03913	0.011765
Rpl31-ps16	94.3367	1.03893	0.00874651
Plekhf2	391.596	1.03864	3.4781e-10
Efnb1	347.492	1.03653	1.96251e-07
Gpx4	15070.7	1.03617	2.4552e-09
Fam214b	1462.59	1.03596	5.79186e-11
Hbs1l	4908.21	1.03496	1.46921e-38
Rps13-ps5	26.7089	1.0349	0.0240904
Atp5d	7992.53	1.03479	4.89914e-13
Sod1	7945.1	1.03451	5.54075e-15
Mthfd1l	1964.85	1.03434	5.29228e-05
Mrpl38	1679.11	1.03372	1.07308e-14
Nr4a2	174.197	1.03313	3.66569e-05
Tex30	300.78	1.03305	0.00165084
Pfkm	3671.09	1.03246	2.03453e-12
Hmga1	10223.7	1.0324	0.000107591
Gm17709	122.554	1.03164	2.40136e-07
Serpinb6a	9297.12	1.0309	7.07245e-19
Opn3	112.064	1.0303	1.36023e-06
Rps15a	30497.8	1.0299	1.8562e-08
Samhd1	3737.54	1.02958	7.21018e-16
Afdn	6938.09	1.02925	3.9006e-11
Nsa2	9495.71	1.02908	7.68371e-08
Zfp428	275.33	1.02858	5.06662e-08
Eef1g	80391.9	1.02852	1.4699e-10
Pdgfc	1278.89	1.02805	1.67539e-09
Wdr74	1689.81	1.02778	3.40473e-11
Gm12191	13447.1	1.02671	1.58383e-09
Trim47	1273.01	1.02633	2.662e-08
Gm6286	108.336	1.02626	0.00108486
Lrrc8c	1417.4	1.02623	1.51505e-07
Fbxl8	383.151	1.02545	1.96825e-06
Ppme1	2062.27	1.02499	1.73159e-14
Smndc1	2122.33	1.02447	7.27074e-15
Nfe2l1	17080.7	1.02296	7.25559e-15
Ighmbp2	888.997	1.02288	4.15163e-17
Agpat3	4907.69	1.02227	4.054e-19
Ssr4	4717.05	1.02208	1.128e-07
Ccdc15	119.215	1.02157	1.76952e-05
Gm340	499.429	1.02149	4.01538e-11
Mta3	1941.02	1.02143	5.92038e-17
Rpl39	31120.4	1.02132	6.95293e-06
Serbp1	24175.3	1.02079	1.25941e-19
Usp35	407.422	1.02076	0.00011146
Btf3	18129.3	1.02036	1.15247e-11
Gm12696	377.035	1.02015	2.15109e-09
Cthrc1	357.534	1.02	5.97945e-07
Rnps1	1965.84	1.01864	1.33648e-09
Hsd3b7	1224.25	1.01861	1.11908e-07
Pml	1978.1	1.01822	2.01592e-10
Gm8113	678.756	1.01807	0.000471699
Pwwp2b	1031.02	1.01755	5.91553e-07
Mocos	401.673	1.01703	3.92001e-08
Eif3g	4110.82	1.01641	1.11021e-12
Eml5	284.73	1.01604	0.00242068
Cars	3768.25	1.01586	3.45927e-16
Mgat4b	6635.71	1.01535	1.60307e-09
Tpst2	2312.6	1.01485	2.13223e-10
Fads3	4292.42	1.01445	4.30767e-05
Eif3f	13440.7	1.01442	5.87644e-05
Vegfa	2252.33	1.01414	4.75437e-13
Rps6	9260.2	1.01396	9.62889e-07
Mark4	1158.33	1.01375	1.76111e-07
Phactr4	1891.98	1.01373	1.40865e-08
Rpl6l	113.501	1.0135	0.0300055
Tubg1	1655.84	1.01204	1.07444e-05
C920021L13Rik	43.1738	1.01078	0.0055414
Trim11	1637.38	1.00967	5.17937e-15
Qars	5609.25	1.00952	1.58859e-08
Cobll1	2804	1.00898	3.0784e-14
Cct5	20882.6	1.00897	2.47882e-20
Spire2	545.564	1.00858	2.43995e-13
Ms4a4d	289.801	1.00762	0.037766
Ulbp1	1078.85	1.00706	0.000338766
Oser1	2251.69	1.00658	1.80509e-07
Nfil3	1259.06	1.00629	1.97913e-06
Kdm6b	4030.26	1.00573	2.68583e-06
Cisd1	1216.64	1.00523	2.08581e-08
Klc4	995.625	1.00446	2.90445e-05
[truncated: 6,513 more rows]

## Sheet: DEgenes_NIH3T3_TAZ-CAMTA1_vs_EV
Gene	baseMean	log2 Fold Change	padj
Slc2a12	153.088	10.4556	0.000214513
Lamb3	47.9384	9.84043	5.23808e-13
Psca	64.9212	9.81721	8.55728e-13
Hephl1	25.6022	9.35447	5.90822e-11
Spo11	29.7567	9.11417	1.10136e-10
Gm2163	20.5104	8.96075	0.0279067
Gm5812	53.478	8.93046	0.00062079
Klk1b27	12.0421	8.39162	1.37567e-07
Vnn1	94.9677	8.26532	3.49526e-21
Mup5	8.55503	8.20373	3.09464e-07
Slc47a1	16.3281	8.16305	4.97021e-08
Ecscr	21.5515	7.95019	3.38776e-08
Ptprt	174.328	7.74921	1.50159e-11
Sh3tc1	213.073	7.67279	6.90323e-24
Dthd1	17.0548	7.55934	2.45465e-06
AU021092	16.8814	7.46285	3.20111e-07
Cdh5	11.0026	7.3209	1.00404e-06
Itln1	5.00508	7.31633	6.50857e-05
Serping1	32.7794	7.20099	1.67323e-07
Cyp4b1	7.70014	7.13885	7.85119e-05
Slc2a5	32.5193	7.09974	7.18522e-15
Chst1	44.5196	7.02568	2.02923e-18
Anxa8	232.838	6.99251	4.82942e-07
Gm13303	7.26901	6.96913	0.000745908
Gm21293	16.493	6.64826	4.71519e-05
Gm9428	14.619	6.51092	1.19997e-05
Gm1110	11.9262	6.35567	0.00014212
Gm13284	12.9921	6.29485	4.81841e-05
Insc	11.9876	6.27086	2.42869e-05
Upk3b	18.3839	6.26572	4.05984e-07
Nes	211.71	6.18435	1.15386e-31
Tmem150b	157.485	6.09721	0.00533856
Gm5286	7.53189	6.0892	7.92532e-05
2610028E06Rik	10.9757	6.02461	3.37513e-05
Gm13415	175.334	6.01806	3.66621e-21
Gm27286	31.9452	6.01787	0.000224608
Lhx4	18.423	5.98047	3.902e-08
B3gnt3	5.75918	5.97657	0.000454332
Serpinb9b	3482.51	5.97453	2.69003e-56
Tmeff2	105.296	5.97303	5.278e-35
Pdzd2	406.351	5.88981	1.12502e-19
Wnt7a	83.295	5.87373	5.30036e-05
Gm14373	26.2721	5.73396	0.0140667
Lyz2	828.236	5.71074	8.47705e-40
A730049H05Rik	20.8064	5.68275	1.78453e-07
Als2cl	101.828	5.66602	1.34873e-10
Card10	5.87499	5.65774	0.000463614
Gdf15	40.7717	5.56705	1.11263e-05
Gm6083	6.94732	5.51906	0.00109267
Adam22	234.575	5.47789	6.3085e-12
Erbb3	69.4612	5.45628	4.02566e-18
Mill2	7.23658	5.42334	0.000400067
Slc6a12	232.627	5.42267	0.000204154
Gm12153	16.7324	5.4111	0.000289963
Calcb	38.5236	5.40383	1.9835e-05
Gm15452	18.4912	5.37282	0.00200221
Cyp2ab1	5.55444	5.32791	0.00136406
Cobl	32.6394	5.2631	1.87222e-09
Ces2f	8.0356	5.2055	0.00221681
Gm10256	43.0094	5.18743	5.01791e-14
Synpo2l	127.413	5.08253	2.50129e-24
Ptprj	72.0627	5.07528	4.01344e-27
Crct1	218.199	5.04541	0.000655894
Cdhr1	7.4291	5.0353	4.47296e-05
Gm10696	6.66762	5.02179	0.00537535
Limch1	706.477	4.99167	1.05305e-27
Gm16531	8.9146	4.92369	0.0011713
Tspan15	23.8425	4.9115	1.76138e-12
Gm43154	35.3263	4.89948	0.00207516
Fyb2	205.462	4.88736	1.06782e-19
Cyp3a41a	110.788	4.86325	7.20518e-17
Gm13418	7.05192	4.85401	0.00686414
Hist1h4n	13.899	4.83887	0.00374327
Cyp4f40	16.7882	4.78354	0.000303065
Prkag3	47.0875	4.77663	6.78304e-22
Gal3st2	33.3969	4.77602	0.00458573
Atg9b	216.608	4.77028	4.97174e-18
Robo3	32.484	4.75664	0.00602793
Cyp24a1	5.8173	4.70386	0.0127657
NA	26.0631	4.66342	0.00414532
Serpinb1c	17.2023	4.62473	0.00703974
Elfn1	11.5776	4.6089	1.05285e-06
Arhgap9	58.2115	4.55258	1.31894e-06
Ikzf4	76.1794	4.512	3.78327e-06
Psg17	21.4702	4.50908	6.06243e-08
Slc27a6	6.664	4.50654	0.0151566
Synpr	13.6668	4.4996	0.00649126
Hs3st1	5.54612	4.47668	0.0039251
Pkp2	365.327	4.46857	1.11734e-63
Ces2e	38.3663	4.46641	0.000641911
Sorl1	6.29132	4.45089	0.0135572
Tmem171	242.282	4.4417	4.98985e-06
Rnd1	586.338	4.43831	9.67749e-44
Kctd4	12.5247	4.42507	1.12422e-05
BC051019	6.8173	4.42361	0.010356
Rapgef5	8.0565	4.41055	0.0168864
Prr32	25.911	4.408	0.0099002
Cth	393.519	4.39855	7.36932e-11
Serpind1	71.4025	4.39184	1.55785e-18
Fras1	50.5421	4.3865	0.00919944
AU018091	5.2365	4.36914	0.00367197
Ankk1	13.3364	4.36881	0.00903014
Serpinb9c	5.60867	4.34203	0.0301423
Cgn	236.025	4.30199	4.34913e-33
Enkur	17.5217	4.27618	7.09145e-06
Serpina5	6.80192	4.27294	0.0226211
Rhpn2	103.224	4.26194	6.99884e-34
Cdhr2	8.71526	4.25682	0.000133013
Pax8	75.1137	4.24629	1.24449e-06
Gpr179	12.9174	4.23813	7.85913e-07
Slc30a2	5.64036	4.228	0.0120682
Lamc3	81.7366	4.2138	7.61537e-14
Ifit1bl1	78.35	4.18676	2.09906e-27
Rbmy	70.4737	4.17847	1.91369e-10
Tacr2	9.77312	4.16553	4.0869e-07
Cxcl1	119.975	4.16382	1.70663e-23
Ctnnd2	13.329	4.14528	0.0119014
Serpinb9g	65.5698	4.11207	0.00977507
NA	6.54316	4.08156	1.32382e-05
Gm53	5.85482	4.05617	0.0328486
Ccl6	20.1502	4.05259	1.17298e-05
Best3	5.26857	4.03093	0.010241
Gm17167	121.345	4.01584	1.21619e-42
Adgrf5	8.0508	3.99468	0.00118771
Tmem71	6.05739	3.98392	0.00863878
Susd2	15.1337	3.95703	0.000244799
Apob	19.0315	3.95659	2.96726e-05
Dppa5a	5.54731	3.94838	0.00537196
Lman1l	19.177	3.93624	4.95265e-07
Adcyap1r1	11.1452	3.93283	1.18814e-05
Itga3	4169.26	3.90838	2.01136e-50
Nlrc5	42.3917	3.90464	5.79562e-21
Klk14	5.47072	3.90456	0.0111516
Lypd5	36.5374	3.89228	0.0320845
Car6	110.811	3.89173	1.20823e-08
Ms4a4d	289.801	3.85724	1.12131e-18
Sult4a1	8.2985	3.85682	0.0451278
Cd209c	391.252	3.83728	1.01195e-22
Wt1	33.018	3.82916	8.09441e-09
Dusp8	245.719	3.8256	9.63294e-35
Cyp4f14	11.0506	3.79226	0.0279743
Fbxw10	18.3928	3.76835	3.3246e-05
Btn1a1	43.1525	3.7574	3.95498e-07
Scel	35.5646	3.73979	0.0467311
Oxtr	5.26716	3.70953	0.0439831
Myom2	1179.53	3.70642	1.42605e-21
Gm12505	700.528	3.7038	3.06152e-28
Gm13988	25.6352	3.6921	2.98712e-06
Col6a4	50.0417	3.67607	6.69618e-15
Birc7	495.598	3.66519	8.76963e-11
Atp2a3	10.6744	3.65761	0.00164651
Des	60.7591	3.62368	1.39906e-07
Sod3	262.731	3.60799	1.37487e-13
Serpinb1a	435.17	3.60457	1.64317e-14
Syk	89.2727	3.6035	8.7735e-07
Gm20400	779.139	3.59255	1.85167e-20
Gpr174	13.3352	3.58945	0.019218
Gm26870	5.06008	3.58743	0.0471625
Fcna	17.1669	3.57904	0.018083
Adra1b	80.7311	3.56472	2.50129e-24
Plb1	53.1638	3.5618	3.50289e-14
Fgf21	49.4827	3.54994	0.000269173
Sh3bgrl2	10.5907	3.54932	1.27375e-05
Ccdc180	8.66808	3.54909	0.0015822
Ms4a4c	8.55212	3.54074	0.00421468
Plscr2	362.9	3.53696	1.76978e-24
Zfp750	9.30652	3.50627	0.0185652
Fmo2	37.1448	3.50403	5.47094e-06
Matn3	9.12213	3.50389	2.33175e-05
Gm27224	10.4132	3.50347	0.00118639
Ereg	462.348	3.49558	1.58763e-20
Car14	32.9969	3.4918	1.24803e-07
Itih4	19.7059	3.47254	1.45435e-06
Apol9b	84.642	3.44266	5.06313e-17
Il15ra	123.638	3.43545	1.13486e-23
Slc39a4	5.3281	3.42359	0.0141907
Bcam	6.82103	3.40725	0.0454405
Htatip2	7.89252	3.402	0.00209843
Pla2g5	14.7706	3.39511	0.00438507
Fbln1	65.6633	3.39511	1.65808e-12
Anpep	300.051	3.39325	2.66935e-17
Far2os1	51.8405	3.3862	6.92177e-07
Ica1l	23.4277	3.37782	7.47692e-08
Adamtsl1	75.6229	3.37516	2.87824e-07
Prss12	16.0826	3.36179	1.09464e-06
Gm10230	10.1898	3.3517	0.00909885
Gm11884	8.16574	3.33485	5.02596e-05
Rassf6	30.4641	3.32186	7.59294e-05
Arxes1	501.997	3.3162	2.48545e-21
Havcr2	173.016	3.30149	1.53138e-08
Rassf7	636.397	3.30054	8.57762e-35
Gdap1l1	51.6148	3.2736	5.36056e-08
Vwce	9.51362	3.26915	0.00417389
Ly6i	6.09454	3.26435	0.000245712
Eps8l2	14.9763	3.26196	0.0280221
Gm3376	148.22	3.25548	2.5746e-24
Ostn	5.88147	3.24143	0.0220742
Gja1	1405.95	3.2295	4.97871e-21
Phactr2	110.901	3.22481	8.25317e-17
Rnf165	18.2687	3.21239	1.33182e-05
Aloxe3	163.782	3.20786	2.69166e-21
Il3ra	21.8702	3.1955	1.5591e-07
Gm12840	2928.57	3.19408	3.26369e-09
Flrt1	7.03897	3.18118	0.00425894
A530016L24Rik	46.4352	3.16997	5.71869e-07
Ifnlr1	8.94873	3.15808	0.0134097
Hbegf	543.538	3.15246	9.3702e-38
Gpat3	333.521	3.14712	6.47896e-45
Snhg7os	10.4409	3.13862	0.00317515
S100a7a	436.701	3.13691	2.61608e-28
Camta1	704.168	3.11761	2.95603e-70
Siglecg	4363.02	3.11045	1.17138e-35
Slfn5	11.2425	3.09985	0.0112223
Btn2a2	21.6726	3.09103	0.0360084
Ttn	108.536	3.09094	0.0330685
C3ar1	28.4568	3.08168	1.95896e-05
Gsta3	16.3646	3.03039	0.000170433
NA	15.1542	3.02626	8.60774e-05
Tfec	10.9954	3.02618	0.0024738
Fmo3	67.83	3.01304	7.60054e-06
Tmem37	109.536	2.99555	2.5746e-24
Tspan32	38.523	2.98962	2.70744e-08
Abi3	24.7526	2.98444	0.00218715
Dlk2	145.183	2.97217	8.20671e-16
Inpp5d	43.7488	2.96052	0.0095535
Gm26651	25.6122	2.95537	9.89682e-06
Mamld1	9.31357	2.95181	0.0203197
Gm11331	59.2267	2.94753	7.05332e-06
Rnf112	13.0342	2.94175	0.000572885
Ggt5	37.7648	2.93991	0.00696863
Aldh3a1	155.603	2.93372	1.24786e-09
Sybu	5.6768	2.93191	0.0110183
Fbxo15	9.25004	2.92384	0.000629466
Tinag	23.1949	2.91396	1.7246e-06
Ptchd1	55.7226	2.91383	4.06265e-07
2200002D01Rik	188.591	2.91283	1.74992e-32
Stbd1	242.833	2.91282	3.28775e-29
Upk3bl	49.5526	2.91088	0.00236936
Taf7l	8.4165	2.91049	0.0120738
Gprc5a	2003.57	2.91039	1.13486e-23
Prrt4	6.2351	2.90615	0.00386211
Clvs1	109.391	2.90118	1.7694e-12
Cdsn	1502.66	2.88114	6.67999e-34
Ccdc3	14.8637	2.87245	0.000540142
Loxl4	984.285	2.86575	5.09246e-29
Casq1	13.5734	2.86001	0.000895495
Acsbg1	82.3921	2.85701	4.27098e-15
Syt17	46.8465	2.85077	1.80419e-08
Ptgs2	3952.83	2.84377	4.20276e-09
Gm11380	56.6062	2.8355	1.16451e-11
Plekha6	15.6018	2.83285	0.00624148
Hoxb3	9.19371	2.82798	0.00450842
Ptprv	67.1469	2.81984	0.000138081
Prss27	17.7206	2.81722	0.00172067
Jph2	553.318	2.8159	3.73709e-08
Cox6a2	24.8909	2.81063	4.4814e-08
Itga1	65.1732	2.80923	1.29061e-13
Lims2	179.016	2.79777	6.11527e-11
Hspa12a	126.854	2.79144	6.09167e-30
Heph	11.4374	2.79031	0.00447898
Ccdc184	7.87576	2.78788	0.00173539
Prg4	107.048	2.76487	1.07945e-06
Ulbp1	1078.85	2.76106	1.03948e-24
2310002F09Rik	28.5421	2.74276	0.00030516
Chac1	2414.32	2.74271	1.17267e-29
Grk5	918.525	2.74201	2.12586e-28
Ccnd1	5838.88	2.73658	2.60315e-07
Cst6	60.2186	2.71606	3.91686e-09
Arl9	5.95129	2.70576	0.0273367
Hoxb6	11.0481	2.69476	0.00911102
Tmem88	67.0204	2.69232	9.5955e-14
Ces2g	117.943	2.69231	8.0144e-11
Tspan12	74.6818	2.69191	8.0144e-11
Catsperd	26.5426	2.66356	1.87753e-06
Atp6v0a4	40.0786	2.65632	1.57326e-07
Epha2	1944.11	2.65401	2.76702e-18
Gm9750	83.5296	2.65082	4.64286e-11
Lgr6	16.1482	2.65005	0.0450563
Ninj2	25.8424	2.64638	0.00805391
Erc2	648.41	2.64405	1.08181e-53
Hoxb3os	9.4246	2.63657	0.020691
Thpo	50.8452	2.62326	2.45628e-11
BC051077	62.1749	2.62271	1.00361e-08
Tspan33	25.3226	2.61835	4.35565e-07
Plaur	1149.59	2.61698	1.37607e-21
Cd28	13.1809	2.61693	0.000516654
Gm5570	6.54343	2.61659	0.0188948
Sema6b	29.711	2.5939	1.38358e-06
P2rx3	1054.95	2.59389	1.10449e-06
Rasl10b	32.8639	2.59222	1.73245e-05
Apol9a	154.793	2.57718	2.62605e-13
Tinagl1	7597.99	2.56274	3.04314e-26
Clu	185.671	2.55516	1.33496e-15
Prr5	206.04	2.55169	5.19741e-31
Hist1h4h	20.5801	2.55136	0.00650445
Fat2	8.05602	2.55015	0.047378
Cilp	7.77203	2.54528	0.0340208
Gm5106	7.07986	2.54308	0.0146916
Cyp3a13	57.5751	2.53948	0.009156
Cstl1	15.0012	2.53429	0.000310069
Inmt	199.452	2.5337	2.17619e-08
Pard6b	681.024	2.53157	2.15003e-16
Cldn9	6.5638	2.52089	0.00580939
Has1	15.9996	2.51539	0.0141907
Gm17173	7.49841	2.50997	0.00509854
Gm26548	14.8637	2.50106	7.23484e-05
Ifi205	92.8112	2.49377	0.000315503
Sync	42.3306	2.48055	1.43391e-10
Ccn1	16942.6	2.46645	1.32059e-07
Cacna1a	1112.65	2.45252	9.07899e-23
Ip6k3	40.3684	2.44735	1.01012e-05
Scn3a	16.9456	2.44169	0.0238067
Gadd45g	1363.86	2.44077	1.28871e-19
Slc9a3r1	541.036	2.43607	6.66923e-24
Cxcl5	153.653	2.43354	1.90076e-09
Mirt1	5.89298	2.42455	0.0489419
Tjp2	3236.99	2.42373	5.90221e-30
Gm26809	35780.5	2.4219	6.97556e-14
Perp	26.9901	2.41957	0.000432759
Cdkl1	21.1172	2.41954	2.62839e-05
Gm26867	112.232	2.41758	9.66606e-09
Sult1a1	55.76	2.41752	2.2459e-06
Olr1	36.0086	2.41592	0.000114015
Igfbp5	819.648	2.40782	3.11858e-05
Kank4os	15.9161	2.38593	0.00134395
Gm17501	28.8555	2.37474	0.000103242
Sgcd	202.506	2.37144	2.53414e-10
Kdr	75.9215	2.36801	0.00421964
Camk2a	97.0639	2.36685	1.15981e-08
Nppb	446.926	2.36524	1.73384e-08
Rnf128	22.0282	2.3615	0.00113548
Ifit1bl2	54.3037	2.34407	1.29306e-11
Itgb7	197.254	2.33821	8.98294e-09
Gngt2	39.7396	2.33196	5.91743e-09
Bst2	1204.43	2.32601	1.03848e-18
4933427I04Rik	39.5447	2.32002	1.18768e-09
Krt14	42.8436	2.31925	0.033832
Hoxb1	35.6242	2.31584	0.0186161
Entpd2	16.7423	2.3142	0.00117447
Stox2	10.8713	2.30974	0.00719559
Pstpip1	90.413	2.29529	2.13967e-10
Mucl3	111.714	2.29324	1.23411e-14
Gm11816	245.277	2.29299	3.92836e-19
Mogat2	37.4973	2.29276	0.0141771
Ces1g	19.455	2.28442	0.00237872
Eda2r	1123.27	2.27657	2.07706e-19
Itga7	815.144	2.2686	2.62809e-13
Spns3	13.8364	2.26398	0.0282551
Abat	7.9587	2.26239	0.02332
Chrnb1	351.149	2.25746	9.77701e-12
Shroom3	71.8822	2.24672	5.12563e-12
Muc13	7.74344	2.24598	0.0166199
Trap1a	12.3381	2.2432	0.0120177
Tgtp1	20.6147	2.24094	0.0299301
Slco3a1	1020.79	2.2404	1.17867e-34
Cep55	681.485	2.23608	0.000110323
Tceal5	16.3223	2.23557	0.0248911
Gm26543	9.39539	2.23105	0.0224418
Cldn15	6.75899	2.23057	0.0358866
Crip2	63.4424	2.22017	6.33749e-19
Klf4	2396	2.20024	4.10556e-32
Eln	24.7987	2.19636	0.000373966
Pla1a	89.475	2.19613	6.93261e-06
4930458D05Rik	61.1937	2.19472	8.44741e-08
Ntn4	184.271	2.18853	1.30931e-16
Igfbp6	10099.9	2.18562	1.17401e-29
Soat2	50.1027	2.1835	2.15158e-06
NA	7.03501	2.17657	0.026326
Cd80	43.1441	2.17457	0.00022406
Ddah1	1706.49	2.17365	4.14462e-13
Anln	4893.27	2.17276	3.10503e-09
Elmo1	276.945	2.16715	0.00369391
Ncf2	13.4177	2.16284	0.041963
Tmem130	8.43132	2.1626	0.0160514
Serpine1	8069.15	2.15671	1.66859e-09
Gm26640	7.68674	2.1527	0.0449878
Diaph3	1284.11	2.1525	2.23833e-07
Aif1l	2280.4	2.14737	9.13123e-24
Cdc42bpg	72.4716	2.14335	0.00505443
Mamdc2	140.42	2.13657	1.91369e-10
Pygm	20.097	2.1333	0.015412
Dnah6	60.0058	2.13295	2.45725e-07
Csprs	36.2346	2.13055	0.0177683
Cd74	18.4667	2.12175	0.0242143
NA	5457.01	2.1167	1.82389e-09
Klhdc8a	1128.7	2.11063	4.49393e-12
Tbxa2r	12.4653	2.1106	0.00621819
Ly6a	4142.02	2.10993	7.78098e-17
As3mt	32.983	2.10662	0.000146273
Prx	427.41	2.09721	9.11138e-22
Gm1141	15.3311	2.09328	0.00184225
Cfap70	23.3829	2.09252	0.0454405
Gm7241	14.923	2.09162	0.00386256
Slc22a13b-ps	8.8269	2.0895	0.0228921
Aqp1	1103.31	2.08592	0.000205288
Igfbp4	605.66	2.08473	7.76654e-07
Suox	3135.58	2.08456	3.66147e-27
Efcab8	17.7495	2.08454	0.00611074
Dusp9	278.676	2.08214	2.2222e-11
Gm23935	1035.19	2.07827	0.00807318
Ptchd4	348.95	2.07668	3.03638e-05
Fads3	4292.42	2.07257	1.86311e-17
Gm16998	21.0663	2.0687	0.000631851
Scara5	982.055	2.06629	0.000559984
Pdlim1	2636.81	2.06187	1.60172e-10
Ttll2	60.6508	2.05772	0.0140346
Olfr1318	12.8938	2.05599	0.0361592
Gm16702	278.18	2.04496	1.43391e-10
Gm14296	55.8944	2.04123	3.14777e-07
Ablim3	364.565	2.03709	2.48154e-07
Gm16178	25.2223	2.03686	5.06377e-05
Sema3c	667.71	2.01824	0.000787418
Trpv4	13.027	2.01687	0.00781882
Pof1b	9.37358	2.01647	0.0431463
Usp17le	14.6759	2.01475	0.0317866
Ica1	26.0975	2.01416	0.00363423
Ankrd1	4164.1	2.01363	5.91743e-09
Steap1	1193	2.00899	1.32107e-10
Ablim1	3555.85	1.9956	3.78589e-21
Eml2	184.966	1.99166	9.98425e-09
9530053A07Rik	64.3729	1.9879	0.0063445
Cpox	1136.26	1.9867	3.01257e-16
C1qtnf2	17.2784	1.97963	0.0013153
Klk8	65.8813	1.97632	0.00458342
Slmapos2	3326.36	1.97414	7.27771e-12
Trib3	1385.44	1.9738	7.00737e-08
Srpx2	547.702	1.97283	0.00173739
2019-09-04	46.9701	1.97065	9.94106e-06
Neurl1a	101.678	1.96463	1.51005e-11
Pi15	156.893	1.95944	1.07615e-07
Als2cr12	58.853	1.94906	5.32112e-06
Sorbs2	490.771	1.93906	2.44894e-06
Cdh19	11.6423	1.91937	0.0253628
Vmn2r96	15.7388	1.9172	9.10261e-05
Rflnb	613.747	1.91114	2.22724e-19
Spon1	17.9031	1.89839	0.00864818
Cryab	13202.5	1.88577	7.32235e-16
Psg19	9.35535	1.88454	0.0366566
Gbp11	15.6837	1.88402	0.00777844
Lipg	535.173	1.87866	1.85932e-16
Plekha2	266.083	1.87796	1.86764e-08
Chn1	68.7785	1.87601	4.29214e-07
Ect2	1479.66	1.87296	0.000329424
Ppef1	316.488	1.87262	1.85167e-20
Gnrh1	12.9618	1.87257	0.00412078
Gm7609	148.6	1.87239	0.000145421
Abcb11	9.53087	1.87122	0.00998254
Fgd6	331.605	1.87047	9.01771e-11
Clcn3	952.431	1.86973	7.02473e-13
S100a11	28004.5	1.86424	1.57407e-17
Zdhhc2	222.392	1.86278	2.23677e-08
1810019D21Rik	9.51621	1.8504	0.0276422
Gm15337	9.80195	1.84947	0.010423
Trim71	10.1124	1.84718	0.0315212
2610316D01Rik	31.6754	1.84536	0.00128661
Smim3	135.046	1.8406	6.50576e-15
Ephx1	9309.26	1.84015	1.82907e-18
Arhgap45	18.5664	1.83529	0.0197905
Slc45a3	239.23	1.83074	8.45087e-13
9330185C12Rik	10.3865	1.82536	0.0274283
Mgam	514.757	1.82487	0.000763609
Igf2bp1	2960.66	1.82259	4.3831e-75
Rap1gap2	970.539	1.82133	3.06067e-11
Prrt3	27.499	1.82009	0.000872237
Hist1h2ac	24.7419	1.81697	0.0104014
Clec3b	429.619	1.81474	0.0237333
Dnph1	336.876	1.81032	2.69456e-08
Phactr4	1891.98	1.80996	1.44995e-24
Mcam	18.6258	1.8067	0.0266787
Platr15	27.5577	1.80471	0.000238447
Pcdh10	140.297	1.79986	1.72714e-11
Cavin2	13533.1	1.79897	5.60655e-07
Rab30	327.368	1.79648	3.75669e-06
Inka2	122.816	1.79476	0.000134304
S100a3	56.3242	1.79429	1.14157e-05
Ptgs2os	66.7624	1.78969	1.01449e-05
Hoxa1	320.537	1.78837	4.45209e-13
Adam33	32.3183	1.78316	6.00778e-05
Mmp28	209.928	1.78162	6.78444e-08
Nr1h5	425.424	1.78081	0.000734889
Itgb4	228.691	1.77967	0.0422865
Gm26525	46.5651	1.77712	0.000867842
E2f7	788.128	1.77176	1.72354e-06
A430106G13Rik	6.65314	1.77174	0.0477488
Fosl1	1007.4	1.77135	7.10337e-08
Serpinb1b	80.3828	1.77123	0.000107038
Sh3tc2	46.0176	1.77022	0.000373966
Msln	8968.24	1.76879	0.0121504
Serpina9	31.4217	1.76763	0.00116631
Eqtn	8.29234	1.75951	0.0349461
Gm15731	11.9838	1.7563	0.0234771
Kcnab3	152.166	1.75625	1.42866e-09
Dpep2	58.1446	1.7543	6.86359e-06
Klhl30	170.201	1.75171	0.000797159
Fendrr	16.4166	1.74824	0.0245291
Cd59a	250.561	1.74653	1.48624e-11
Prune2	851.286	1.74426	1.44946e-12
Slc7a5	7418.66	1.74146	1.07945e-06
4931428L18Rik	8.3434	1.74108	0.0389534
Rhox5	444.766	1.74078	1.82389e-09
Phex	174.47	1.73382	1.12332e-06
Lama5	488.289	1.73225	0.00970558
Tmem204	18.7921	1.73133	0.00139022
Gm5380	24.313	1.72591	0.00239292
Nrcam	42.6001	1.72431	0.00120568
Acy3	101.983	1.72319	1.56752e-09
Prelp	2798.88	1.71943	0.000613769
Sap25	22.9336	1.71701	0.0341301
Arhgap18	896.458	1.71213	6.99951e-06
Krt80	423.338	1.7086	1.15386e-07
Ddias	367.242	1.7069	7.32606e-05
Fstl3	1713.82	1.70378	2.76561e-15
Vgf	80.4861	1.70288	2.73457e-06
E2f2	41.4852	1.70032	0.0136644
Tmcc3	374.235	1.69933	1.16926e-10
Ryr1	20.1311	1.69197	0.00794328
Igf1	89.9825	1.68957	0.000351493
Ercc6l2	120.823	1.68919	3.15075e-08
Crybg2	69.9443	1.68818	7.27996e-05
Nol4l	22.6733	1.68704	0.0450613
Atf3	486.708	1.68677	6.02912e-14
Gpr39	133.086	1.68619	0.000194133
Svep1	11238.1	1.68421	2.02546e-10
Pi16	9.39126	1.68379	0.0274283
Gm20521	108.193	1.68252	0.0028387
Spc24	355.834	1.68061	4.44999e-06
Ccl9	880.619	1.67862	2.79103e-05
Ogn	19779	1.67486	0.00791396
Mbnl3	134.283	1.67399	7.29132e-08
Gm22620	10.9903	1.67316	0.0420042
Slc6a15	33.4923	1.67307	0.0100081
Ehd1	9278.79	1.66548	1.00706e-18
Gm11525	36.8013	1.65784	0.000655535
2210016F16Rik	2097.05	1.65663	6.08046e-13
Zfp52	703.599	1.65445	0.000124179
Ctps	9423.68	1.64737	9.11138e-22
Cldn34c1	161.847	1.64732	1.51956e-08
Gm12138	2019.19	1.64537	6.62102e-07
Gm10382	31.8708	1.64361	0.026066
Arhgap29	5638.4	1.64279	1.74513e-11
Ccl5	19.0303	1.64138	0.0254096
Atp2b4	128.206	1.63854	0.0010214
Tfrc	1850.03	1.6385	0.00181236
Gm2115	916.891	1.63733	1.80914e-09
Gm4876	18.0439	1.63523	0.0272644
Gm13285	29.5364	1.63073	0.002521
Tmem62	479.903	1.62819	5.48987e-21
Csdc2	64.8768	1.62682	7.43229e-05
Emx2	282.5	1.62409	7.31265e-10
Hfe	52.7239	1.62394	5.29423e-05
Plxna4	92.7583	1.62347	0.000785915
Ripk3	33.3137	1.62313	0.0165185
Gm4841	16.5159	1.61888	0.0278645
Gm12128	11.4453	1.61571	0.0312704
Gm19705	81.4969	1.61558	3.23133e-07
P4ha3	952.269	1.61541	7.22563e-09
Adarb2	76.9727	1.61511	0.000446638
Csrnp1	607.384	1.61496	7.60054e-06
Gtse1	869.287	1.61404	4.25659e-05
Camsap3	10.7465	1.61011	0.0284681
NA	125.656	1.60979	0.000733687
Pla2g4b	67.6178	1.60957	0.00809412
Bglap3	128.199	1.60763	1.64317e-14
Cd53	21.1945	1.60627	0.043976
Acer1	15.4656	1.60553	0.0442376
Pfkp	1611.63	1.60416	2.39468e-12
Cystm1	169.287	1.60303	0.000124994
Lyn	252.21	1.5936	1.61364e-08
Golga7b	16.5421	1.59226	0.0257929
Vldlr	180.106	1.59002	1.34368e-05
Gm5620	281.541	1.589	5.58343e-05
Zc2hc1c	99.2364	1.58604	1.0496e-07
Psat1	15457.8	1.58595	1.96712e-07
Cd14	165.794	1.58567	2.42174e-08
Gm14444	29.8485	1.58515	0.0040027
Hist1h4i	68.6987	1.58503	0.0149395
Nek2	1268.79	1.58218	2.70654e-06
Steap2	5089.31	1.57872	1.3303e-14
B3gnt5	34.6745	1.57783	0.031412
Gm6410	85.2821	1.57673	3.03239e-07
Rrm2	2219.88	1.57231	0.00328597
Dusp1	2323.36	1.57021	1.68764e-06
Nup210l	38.3385	1.56906	3.1453e-06
Iqgap3	1736.91	1.56607	4.01974e-05
Sh3rf2	283.663	1.56603	0.0053963
Mybl2	567.713	1.54951	5.20318e-05
Gsta1	191.607	1.54521	0.00102416
Odc1	6015.14	1.54361	1.33064e-27
Rnf225	18.6574	1.54127	0.0231427
Ptgds	167.419	1.53654	6.50429e-05
Gcnt3	16.2547	1.53263	0.0313207
Sh2d6	55.4154	1.53139	0.000240029
Arl5c	11.2525	1.52988	0.0416316
Akr1b3	27184.1	1.52557	1.34702e-05
Serp2	10.3655	1.52199	0.0401092
Angptl6	251.31	1.5155	1.70562e-08
Ism1	148.832	1.51115	0.000319438
1700020L24Rik	39.0935	1.502	0.000416398
Arhgap20	61.5028	1.49331	0.00944222
Il11	23.3421	1.49221	0.0029402
Tent5b	1620.45	1.48851	4.25697e-17
Rin3	39.4385	1.48796	0.000675822
Boc	364.911	1.48654	3.9014e-06
Prkg1	134.489	1.48562	4.71346e-05
Tnr	97.7196	1.4854	0.0119853
Cd59b	100.698	1.48424	0.0021631
Plac1	35.7602	1.4842	0.0019957
Hrct1	51.6807	1.48322	0.000177378
Calhm5	378.444	1.4816	2.90112e-19
Atp10a	1864.78	1.48122	2.61933e-09
Sorbs1	833.086	1.4795	3.46174e-15
Smpd3	867.481	1.47176	2.39468e-12
Ifit1	122.496	1.47151	1.30336e-06
Lfng	220.612	1.46983	1.87072e-07
Ajuba	2948.79	1.46821	2.32626e-24
Raph1	579.108	1.46771	1.05429e-09
Dqx1	97.9924	1.46621	3.32015e-07
Glt8d2	963.685	1.46422	7.29849e-10
Asf1b	669.987	1.46421	0.000463614
Gm16364	22.2522	1.46399	0.00210709
Ppm1h	131.711	1.45968	0.00239118
Gpc6	435.677	1.4595	5.2957e-08
Ly6e	6968.05	1.45949	3.2862e-15
Foxm1	2886.17	1.45878	0.00025695
Hells	1567.74	1.45674	0.0455063
Gm23130	69.1672	1.44941	0.0301548
Itga6	3086.58	1.44861	1.90123e-19
Creld1	74.5769	1.44755	0.000545277
Kctd9	1161.4	1.44581	1.93394e-07
Nqo1	596.467	1.44454	1.5073e-05
Tnxb	839.043	1.44331	2.24702e-19
NA	49.4263	1.43734	0.00797149
Aunip	99.4353	1.43724	0.0130518
Tns4	36.473	1.43664	0.0307749
Sorbs3	4375.99	1.4331	4.41929e-23
Cd55	298.581	1.42444	0.00841171
Neo1	4545.56	1.42337	2.71436e-41
Clic3	21.7678	1.42268	0.0442913
5031410I06Rik	317.204	1.42107	0.00623153
Rad54b	268.039	1.42	0.00121533
Nexn	586.759	1.41836	0.00298002
4930558J18Rik	24.7967	1.41477	0.0111511
Sapcd2	288.919	1.41367	0.00625958
Fam117a	85.5209	1.41231	0.00121864
Lrr1	63.464	1.41112	0.0134994
Igfbp7	2473.48	1.41005	6.4334e-08
Eml5	284.73	1.40889	4.70768e-05
Slc25a25	821.544	1.40762	8.91907e-08
Tmpo	7007.13	1.40699	6.23318e-15
Defb41	36.0806	1.40614	0.000143981
Acot2	886.342	1.40613	1.32017e-12
Gria3	1179.23	1.40274	3.11982e-09
Naaladl1	22.9819	1.39997	0.0489419
Gm38393	571.023	1.3989	3.43296e-05
Colq	10.8199	1.39772	0.0204791
Ckap2	2101.54	1.39573	2.65995e-05
Cd93	188.258	1.39214	0.00212614
Fgd3	456.621	1.39108	9.62049e-05
Abca4	66.5511	1.38736	0.000547354
Galnt15	67.0768	1.38705	0.00363586
Prc1	2935.88	1.38649	6.00778e-05
Mfsd4b5	246.147	1.38165	1.24449e-06
Crlf1	353.01	1.37265	0.000218947
Cip2a	1058.15	1.37246	0.0198205
Mtfr2	211.422	1.37207	0.00224545
Tk1	1172.74	1.36913	0.00106985
Lmcd1	190.966	1.36853	0.00719498
Ube2c	1898.38	1.36365	0.000104352
Ska1	241.124	1.36259	0.00329279
Dbf4	1797.84	1.36164	1.20858e-05
Maff	1125.07	1.36085	4.4235e-07
Kif18b	709.532	1.3607	0.000309335
Sp100	229.871	1.3601	0.000194303
Gm10660	29.5555	1.35932	0.0332499
Pmaip1	85.1552	1.35747	0.009583
NA	87.8527	1.35377	0.015759
Hipk4	55.6043	1.35337	0.000104949
Dennd5b	74.3048	1.34804	0.00797473
Gm26672	17.7685	1.34596	0.00990679
Ccna2	3121.37	1.34169	0.0015496
Hipk2	2809.34	1.34013	3.92836e-19
Sms	1954.67	1.33604	4.59134e-16
NA	37.8215	1.33453	0.0279067
Fanca	670.116	1.32957	0.000771243
Fam111a	2899.28	1.3268	3.16502e-05
Cavin4	290.981	1.32598	1.46493e-06
Gm20465	16.417	1.32432	0.0448214
Dmpk	271.59	1.32371	7.879e-06
Nmnat3	174.672	1.32307	5.50993e-08
Gm10825	19.2366	1.31887	0.0311934
Agt	230.417	1.31805	0.00424161
Rras2	2707.73	1.31657	2.90838e-11
Eno3	744.512	1.31438	7.92653e-05
Mybl1	202.101	1.31334	0.00816157
Cdk1	3299.07	1.31276	0.00013672
Wdhd1	811.81	1.31173	0.0350645
Cdc6	389.114	1.31125	0.00805391
Col12a1	2667.38	1.30893	1.2246e-20
Gm5526	15.9332	1.30414	0.0284816
Cd151	4413.73	1.30341	8.28493e-17
Recql4	294.08	1.29854	0.00242321
Hectd2	366.626	1.29435	3.8988e-06
Gata3	165.703	1.29345	0.00324554
Pla2g16	886.313	1.2919	8.5734e-08
Frat2	305.788	1.29098	4.98985e-06
Cd84	73.9084	1.29007	1.28074e-07
Gm14427	29.0327	1.28795	0.0109558
Stambpl1	1280.98	1.28793	5.50905e-12
Tmem238	87.9143	1.28651	0.00132046
Olfm1	251.978	1.28509	0.00307503
Spsb1	515.999	1.28387	3.23856e-16
Plk1	1159.24	1.28355	0.00317844
Sgms2	1191.81	1.27923	2.48687e-17
Mtss1	37.2625	1.2782	0.00214857
Wwc1	1254.51	1.27662	1.36961e-06
Raet1e	152.564	1.27656	6.22911e-07
Col4a5	13744.7	1.27386	4.49729e-23
Polq	283.649	1.26448	0.0156141
Fzd4	527.593	1.26364	9.02373e-05
M1ap	53.5793	1.26192	0.0126913
Vstm5	49.367	1.26154	4.51502e-05
Xpnpep2	463.223	1.26066	3.28425e-05
Lmod1	164.811	1.2597	0.00374537
Tspan9	8905.53	1.25836	7.95079e-14
D630029K05Rik	40.7902	1.25706	0.01042
Sgo1	501.443	1.25613	0.00882603
Tnfrsf23	1998.92	1.2552	2.36838e-06
Kifc1	820.52	1.25501	0.000100191
Troap	510.259	1.25431	0.00359409
1700034P13Rik	389.219	1.2514	3.50769e-11
Knstrn	1791.18	1.25064	5.36445e-06
Mthfd2	2675.16	1.24807	0.000334714
Znrf2	1311.36	1.24655	3.32045e-11
Dhdh	34.0647	1.24592	0.00174849
Adamtsl4	642.44	1.24499	5.64242e-13
Cdc25c	279.931	1.24478	0.00239292
Chek1	275.956	1.24464	0.00858501
Ppp1r12b	4138.33	1.2431	4.0522e-16
Fgfbp3	84.8235	1.24221	7.33503e-06
Hspg2	28446.7	1.24094	3.47178e-09
Tpx2	3448.02	1.23902	0.000201196
Ggct	110.657	1.23604	0.0001463
Gm6736	924.298	1.23544	0.00237038
Kif23	1634.12	1.23468	0.00134395
Lrrc1	506.016	1.23426	3.69682e-12
Trim16	1755.35	1.23329	6.19919e-12
Gfod1	804.243	1.23056	3.76143e-05
2810408I11Rik	99.8887	1.22978	0.0291232
Styk1	452.367	1.2278	0.000292549
Dpep1	950.765	1.22761	0.00356814
Lyrm9	234.522	1.22742	1.90761e-05
Stac3	27.4495	1.22701	0.0110759
Wnt9a	916.147	1.22667	1.24449e-06
Aurka	1220.68	1.22585	0.00339798
Ezr	2125.96	1.22582	9.74581e-17
1700028J19Rik	26.7202	1.2243	0.018639
Hspb7	111.585	1.22274	0.0454742
Mad2l1	1774.9	1.21969	0.000223486
Arhgap19	667.757	1.21672	0.000199796
Chd5	78.1594	1.21577	0.0316975
Hist1h2be	35.4358	1.21475	0.0308188
Vmn1r-ps128	315.81	1.21314	0.00793034
Chst7	291.627	1.21301	3.70808e-06
Osgin1	375.321	1.21289	7.38433e-05
Unc13d	41.0409	1.20884	0.00450578
Tuba1b	52546.5	1.20766	6.77129e-05
Ngf	909.539	1.20589	4.71242e-07
Map1b	6864.42	1.20527	6.53065e-13
Spaca6	1058.43	1.20465	0.000442219
Syt12	32.5991	1.20382	0.026767
Prdx6	12709.3	1.20337	3.034e-09
Parpbp	379.478	1.20271	0.0095535
Cnn2	23457.3	1.20217	5.28826e-23
Gm5844	37.7565	1.19957	0.0374197
Hmmr	1694.01	1.19914	0.00719559
Slc35g1	93.2118	1.19861	0.000589018
Cdc20	2852.26	1.19765	0.000855537
2700099C18Rik	244.646	1.19747	0.0107437
Samhd1	3737.54	1.19378	2.17593e-20
Abcb1b	1465.6	1.19248	2.96553e-11
Slc5a5	16.0311	1.19227	0.0355691
Pitpnc1	829.298	1.19024	6.68126e-06
Tigit	30.288	1.18671	0.0395148
Mcm5	1985.11	1.18264	0.00335831
Endod1	423.569	1.1811	9.90807e-08
Nsl1	311.022	1.17677	0.00250559
Mpp6	1620.76	1.1751	2.49929e-06
Cenpv	267.479	1.1747	2.49708e-08
Gstt1	157.094	1.17436	0.00931195
Nuak2	683.313	1.17433	3.20775e-09
Sgms1	1435.26	1.17402	3.89495e-10
Shmt2	7386.88	1.17261	4.48993e-05
Stard13	1677	1.17257	0.000763609
Map2k3os	158.98	1.16941	0.00110822
Cltb	2400.27	1.1672	5.00418e-08
Orc1	478.313	1.16388	0.000531961
G430049J08Rik	23.4356	1.16233	0.0141474
Ly6c1	1095.47	1.16207	2.3714e-06
Gm15541	42.6485	1.16037	0.00396661
Tdg	173.571	1.16028	5.6333e-06
Dusp14	1099.25	1.16014	1.49582e-07
Mcu	1703.92	1.15893	1.65639e-24
Col8a1	3683.9	1.15649	0.000103615
Psph	959.691	1.15628	0.00116512
Arvcf	1255.27	1.15613	3.60698e-14
Klf2	230.831	1.15571	0.00509396
Nuf2	1145.65	1.15541	0.00958055
Raet1d	118.664	1.15425	0.000392103
Nectin2	3231.19	1.15206	8.05419e-17
NA	127.646	1.15072	0.000108745
Paqr4	951.034	1.14994	2.72678e-07
Ifngr1	2047.3	1.14956	1.65578e-24
Apoe	75.6152	1.14838	0.000110233
Cdca8	1439.88	1.14793	0.00159559
Zwilch	669.388	1.1458	0.000998526
Slc39a10	3524.38	1.14579	1.01449e-05
Rad51	623.621	1.14545	0.0029402
Cmah	754.969	1.13581	0.00879633
Mndal	41.5969	1.13577	0.0314507
Ifrd1	4709.93	1.13562	1.96712e-07
Stc2	605.894	1.13488	0.000464373
Ptpn21	3194.64	1.13221	1.62859e-11
Fancb	219.634	1.13194	0.0244445
Birc5	1048.91	1.13151	0.0123372
Gmnn	367.789	1.1292	0.000944949
Chrd	441.396	1.12827	8.63642e-07
Kcnh2	22.9222	1.12509	0.0254056
Cit	699.307	1.12493	0.00518768
Cenpn	611.63	1.12456	0.000236737
Pif1	283.187	1.12351	0.0140162
Hsp90aa1	28139.5	1.11938	0.000207766
Hspb2	59.2804	1.11855	0.00169247
Lats2	3075.23	1.11816	4.30767e-14
Kif2c	1636.61	1.1145	0.00950651
Gm17709	122.554	1.112	4.95298e-08
Rrm1	7755.01	1.11094	5.86658e-05
Npnt	449.344	1.11087	5.10199e-09
Nav3	643.57	1.10972	0.0215473
Ttc39b	2306.34	1.10919	2.06251e-09
Kifc5b	429.922	1.10888	0.00188631
Abca9	166.197	1.10848	0.0140667
Otud1	340.362	1.10639	3.09627e-06
Cdkn1a	10457.6	1.10635	0.000129827
Macf1	20441.9	1.10393	2.07579e-06
Tbc1d8	59.184	1.10051	0.000423257
Exo1	451.954	1.09662	0.0213192
Top2a	7403.17	1.09467	0.0437051
Csf1	14262.9	1.09321	8.81661e-05
Ier3	749.798	1.09027	5.96023e-05
Tril	35.0587	1.09005	0.0177683
2610318N02Rik	78.5731	1.08637	0.0221669
Cenpq	506.488	1.08592	0.00178507
6430590A07Rik	23.8547	1.08405	0.0422485
Tjp1	4773.97	1.08237	7.28889e-12
Gm26880	2822.47	1.07996	5.45231e-05
Racgap1	3856.47	1.07806	0.000515648
E030030I06Rik	73.1121	1.078	0.0278757
Radil	568.492	1.07469	2.80935e-09
Pld2	1123.43	1.07435	2.07295e-10
Lcat	54.6589	1.07353	8.39467e-05
Txnrd1	11050.7	1.0734	5.12619e-09
Spc25	518.578	1.07216	0.0158865
Cdc42ep5	621.059	1.07105	1.82973e-06
Gcnt2	266.778	1.07092	3.71524e-05
Ncapg	1081.83	1.07048	0.0218974
Ccnb1	1707.03	1.06971	0.00835638
Chtf18	539.443	1.06855	0.0103107
Kif20a	2457.42	1.06787	0.00660695
Gsta4	6626.31	1.0651	6.33703e-07
Rasal2	873.607	1.06448	7.94629e-05
Col7a1	345.917	1.06296	0.00737136
Espl1	1089.59	1.06072	0.0125982
Nop58	4575.78	1.06031	0.00113137
Ecm1	1410.01	1.05875	0.00146856
Pxdc1	198.417	1.05823	1.75335e-05
Pkmyt1	487.068	1.05763	0.00149198
Fat1	9394.68	1.05637	1.20858e-05
Gsto1	9133.18	1.0544	8.7119e-08
Tm4sf1	4004.71	1.054	8.94206e-08
Plpp2	931.329	1.05319	2.29535e-10
AU020206	146.36	1.05227	9.71632e-10
Cks2	825.497	1.05178	0.00385041
Slc7a1	3571.86	1.04989	4.42309e-06
Hist1h2bc	898.562	1.04759	0.0446512
Gm10499	78.6602	1.04464	0.00132429
Eme1	193.701	1.04277	0.0111708
Sms-ps	1178.87	1.04133	3.15555e-07
Arf2	1611.68	1.04061	4.72666e-07
Abcg2	2509.43	1.03664	2.07295e-10
4921524J17Rik	641.611	1.03455	1.60876e-14
Mtbp	724.137	1.03435	0.00123393
Gm26705	51.195	1.03282	0.0103107
Efemp1	43132.4	1.03192	7.5876e-10
Amotl2	15490.2	1.03087	1.44588e-07
Cdk6	743.129	1.03057	9.72747e-10
Cd274	79.8468	1.02946	0.000389729
Pim1	2348.87	1.02905	0.0101425
Tob1	562.354	1.02846	1.05942e-05
Ptgs1	3977.96	1.026	8.34865e-08
Slc35e4	1871.81	1.02502	3.65041e-06
Prkcg	214.771	1.02323	0.000197425
Nckap5	208.312	1.0231	0.0439831
Gm16365	67.3437	1.02127	0.000778304
Prr11	1150.45	1.02103	0.0022967
Gm26909	21.6103	1.02064	0.0399978
Sparc	83467.8	1.01705	2.36036e-06
Stim1	2475.82	1.01554	4.30839e-10
Zfp57	2113.08	1.01521	5.33387e-05
Mcm10	600.836	1.01484	0.0313177
Skida1	68.1952	1.01463	0.00168813
Aurkb	1122.51	1.01266	0.00876502
Gdnf	878.659	1.01258	0.000273245
Ndc80	681.384	1.01212	0.031311
Cxxc5	218.834	1.01161	6.74412e-05
Ttk	376.101	1.0111	0.0264047
Ero1l	4526.18	1.01107	0.000453931
Myl9	237.565	1.00778	0.000637802
Kpna2	566.114	1.00671	0.00240148
Arhgap26	119.83	1.00507	0.000278789
Slc1a5	4845.64	1.00453	8.63642e-07
Cdca3	1209.28	1.00429	0.00500568
Wtip	1616.11	1.00273	6.28544e-10
Gm26788	40.9635	1.00215	0.0147539
Dhfr	781.358	1.00201	0.00708937
Gm11427	43.6166	0.99541	0.0441779
Ppa1	2005.85	0.99465	7.1506e-06
Neu3	186.831	0.993134	1.48657e-05
Asns	8358.73	0.993085	7.43597e-05
Wdr66	88.1271	0.991293	0.00537196
Plcxd2	1602.48	0.990557	5.77904e-08
Phlda1	939.969	0.990156	0.000763996
Kif22	949.295	0.98947	0.00704964
Gm21750	59.6553	0.98907	0.0431964
Mafk	2125.93	0.986862	5.55514e-05
Kif4	977.941	0.985788	0.0174467
Clspn	928.41	0.984549	0.0173064
Bend6	173.039	0.983082	0.000123432
Nuggc	50.0947	0.982753	0.00713457
S100a10	14257.3	0.982446	3.04321e-12
Tnfrsf22	1190.81	0.98163	4.72275e-05
Gm10184	6253.77	0.980593	0.00518768
Tcte2	253.647	0.980386	2.2429e-08
Ston1	4324.36	0.979961	5.51677e-10
Thbd	4214.75	0.979099	0.00018878
Tdrp	456.973	0.978484	9.0477e-09
Cyb5r1	3302.74	0.977643	0.000115219
Magi1	863.009	0.977313	1.3948e-12
Trip13	438.573	0.976834	0.0149162
Atad2	2781.34	0.973985	0.00776286
H2-K1	1381.17	0.972019	9.86227e-07
Fam83d	571.332	0.971653	0.0339999
Tacc3	1930.82	0.970056	0.016706
Slc30a4	4466.82	0.969788	0.00066705
Efcab11	48.0899	0.968023	0.0331235
Cenpm	389.42	0.967883	0.0157361
Rassf5	557.439	0.96539	5.06377e-05
Prps1	1657.91	0.963557	2.88629e-08
Gm16344	100.057	0.963081	5.32009e-05
Fignl1	577.607	0.962972	0.015114
Pdgfrl	4182.67	0.961917	0.000404121
Gm12346	480.59	0.961736	0.00280967
Plagl1	737.43	0.961648	0.00359409
Pdgfa	1217.55	0.961165	5.32622e-13
Tead1	8305.98	0.961026	1.55036e-12
Lyar	1204.94	0.958365	5.09106e-05
Flnb	18993.6	0.958152	2.7309e-10
Pcdh19	2133.01	0.958026	3.75476e-06
Spdl1	447.288	0.957384	0.0215196
Ror1	243.803	0.955912	0.0126857
Emp1	29485.5	0.95552	4.86322e-06
Kank1	1147.22	0.954176	1.17617e-05
Gm10080	25.4548	0.951344	0.0463264
Ercc6l	592.87	0.950573	0.0288854
Lmnb1	1761.41	0.949451	0.00222715
Hacd4	175.973	0.94645	0.0167554
Spag5	1260.81	0.946432	0.02362
Cdca5	431.204	0.945238	0.0341157
Them6	440.621	0.945134	0.000239177
Atp1a1	13088.3	0.943016	2.17074e-09
Mpi	945.575	0.942431	1.55871e-07
Nhsl1	543.136	0.941971	0.0287374
Myo1c	17434	0.941869	3.13058e-10
Magohb	625.362	0.941175	0.000262752
Tbc1d31	1630.86	0.93842	0.000197908
Foxf1	338.94	0.938381	4.91549e-08
Cdipt	3223.08	0.936925	4.02347e-17
Chaf1a	1268.22	0.934871	0.00995391
Cavin1	29736.2	0.934775	1.42103e-10
Acta2	22267.6	0.933799	7.69917e-05
Timeless	737.689	0.930846	0.0057219
Ltbp2	1061.33	0.929152	0.00509854
Col5a2	40728.6	0.928644	0.000202951
Ddr2	21485.5	0.928638	2.39326e-06
Adam9	10091.1	0.928473	6.71976e-07
Rnf113a1	147.465	0.926809	1.76307e-05
Fign	239.683	0.924859	0.00704964
Micu1	6570.29	0.923896	3.25431e-10
Wdr45	2171.77	0.921625	1.41573e-07
Ehd4	2099.21	0.919893	1.59885e-08
Acot9	3567.36	0.919358	5.32547e-08
Cenpu	251.975	0.918396	0.0164125
Gchfr	290.926	0.916222	0.00436679
Incenp	2097.98	0.915911	0.00708937
Spire2	545.564	0.915464	1.40598e-10
Dyrk3	209.797	0.913733	0.000176712
Dlgap5	995.048	0.91343	0.00594127
2810429I04Rik	100.914	0.913105	0.0176901
Rad54l	518.41	0.911273	0.0192688
Llgl2	523.028	0.911145	0.00144382
Me3	835.395	0.911042	4.58005e-07
Tesk2	669.592	0.910257	8.707e-07
Sh3rf1	1249.06	0.909563	1.8356e-09
Plk4	915.317	0.907574	0.00847119
Ccdc9b	3998.15	0.90463	8.98653e-12
Gm15270	34.0197	0.90359	0.0429862
Tex30	300.78	0.903571	0.0146591
Ptch1	475.914	0.903152	2.4376e-08
Pcgf5	1180.44	0.90309	2.4897e-09
Slc16a1	2748.76	0.902949	0.000201145
Traip	238.256	0.901043	0.0148034
Melk	527.128	0.899612	0.0457099
Snx7	2260.56	0.898706	4.05759e-05
Tent4b	1416.6	0.897991	1.35317e-05
Cenpi	568.202	0.897815	0.0279887
Prkci	7019.67	0.897759	2.9499e-07
Car5b	116.617	0.897006	0.00108675
Arhgap44	266.823	0.896045	0.00414146
Calr3	72.6683	0.895592	0.00103998
Eno1b	12787.5	0.894656	7.82577e-06
Cdh17	219.837	0.894158	6.4538e-05
B4galt4	584.345	0.893887	7.14423e-08
Anxa3	7482.76	0.893624	0.000450905
Magi3	1822.47	0.892771	2.70054e-05
Irak3	70.0482	0.892584	0.00797473
Loxl3	4747.79	0.892546	2.11887e-05
Myl12a	24114.2	0.891868	5.46213e-10
Haus8	750.97	0.888655	0.000873647
Dst	14726.7	0.887107	2.56753e-06
Pkn3	159.008	0.887065	0.0325873
Adss	4524.18	0.883301	6.53065e-13
Ddr1	5318.49	0.882599	1.7816e-08
Tbc1d2	1016.92	0.882034	0.000632094
Ddx39	3293.01	0.881356	0.000418802
Cenpw	161.258	0.878502	0.00695675
Hotairm1	163.786	0.87815	0.000356877
Bora	321.195	0.877991	0.015308
Il15	186.935	0.877666	0.00102553
Myadm	15438	0.877253	5.63565e-21
Dlc1	2597.47	0.875371	6.4461e-07
Ptprf	4297.63	0.874245	3.83734e-20
Arhgef18	3617.65	0.872184	3.59909e-09
Gm19426	43.5358	0.870966	0.0197866
Cbx5	6654.6	0.870597	0.000376507
Man1a	1574.81	0.869029	0.000291392
CAAA01147332.1	997.95	0.868654	0.016255
4833427G06Rik	113.596	0.867213	0.00245558
Rock2	6286.39	0.867113	0.00522083
Eno1	16599.2	0.866312	3.09908e-05
Gas6	3563.45	0.864771	0.0107994
Ets1	2712.62	0.864017	4.15623e-07
Mns1	88.6167	0.863863	0.042472
Dhrs9	1469.94	0.86292	0.00121533
Ttc41	109.454	0.862735	0.0233038
Rad51ap1	471.741	0.862238	0.0312711
Sema3f	4201.92	0.860926	1.48934e-07
Herc3	407.835	0.86051	0.000234823
Grk4	204.381	0.860284	0.000425476
Lrp4	529.224	0.860234	0.0199375
Arl6ip1	275.407	0.859482	2.67598e-07
Fbn1	5465.36	0.859442	0.00608164
A930004D18Rik	436.695	0.859348	0.000353998
Cdk2ap2	1795.17	0.858674	2.24383e-06
Prkar2b	2610.18	0.858282	2.0737e-06
Plpp1	5028.84	0.857719	1.68996e-05
Arhgap11a	2033.14	0.857565	0.0309218
Bcl2l1	4294	0.85692	7.48302e-07
Cdkn3	244.149	0.856044	0.0291925
Dtl	972.764	0.855617	0.043677
Ppat	1263.28	0.855315	5.14915e-07
2210011C24Rik	74.3827	0.85511	0.017335
Cenpa	1628.56	0.854842	0.00733276
Dnajc9	984.876	0.854652	0.00121864
Disp1	2262.13	0.854022	1.15366e-14
Nup160	1549.14	0.850444	0.00395969
Slc18a2	77.3435	0.849638	0.0471894
Tiam1	806.689	0.849127	0.000404121
Pola2	1593.73	0.847741	0.00259968
Slc48a1	9279.75	0.845258	1.69291e-06
Lonp1	6941.8	0.844528	5.70774e-08
Spin4	112.98	0.84397	0.0134565
Ybx3	12605.6	0.8439	1.54104e-06
Tns3	8946.53	0.842765	4.09968e-08
Klrg2	65.682	0.842612	0.0280102
Yif1b	1695.9	0.842172	3.53605e-07
Haus6	1556.8	0.841625	0.0114146
Nrm	626.762	0.841573	0.0125982
Tagln2	5657.75	0.841407	0.000454714
Deptor	1172.46	0.841162	0.00273676
Aqp5	257.823	0.841113	0.0283659
Rpp30	619.708	0.839275	2.00403e-06
Slc2a1	3768.58	0.839064	2.7309e-10
Zfp53	773.896	0.8379	0.00472629
Optn	361.568	0.834923	4.00444e-06
Morc4	3288.74	0.83349	2.20043e-05
Ptgis	3691.45	0.83309	0.00164089
Gsdmd	431.267	0.832577	2.96553e-11
Kdm8	161.476	0.830835	0.00526549
Efnb1	347.492	0.830142	0.000130027
Zfp809	553.77	0.830125	3.30213e-05
Ktn1	2814.57	0.829248	0.015308
Nomo1	5376.94	0.828885	0.000103615
Osbpl3	2074.06	0.826671	2.31595e-07
Tmem245	7288.01	0.825443	4.95077e-08
Fas	523.474	0.825174	0.00184589
Asxl3	95.9311	0.823827	0.0275004
Ipo11	1848.15	0.823618	2.34982e-06
Cercam	171.237	0.822599	0.0044523
Dut	1071.49	0.82235	0.0110159
Rpl29	569.759	0.822076	0.0102553
Gm6645	54.9962	0.821377	0.0196724
Ube2t	295.388	0.820314	0.0492797
E2f6	108.696	0.819049	0.00411694
NA	806.772	0.818899	4.40955e-05
Epb41l4a	2231.96	0.818441	2.6439e-12
Stil	640.234	0.818067	0.0142845
Gk	712.742	0.817435	0.00435911
Rbms2	13507.5	0.816234	0.000205288
Abca5	1770.48	0.815844	0.000778091
Slc38a4	4435.55	0.813845	0.000554529
Ccnb2	359.596	0.813144	0.0225129
Adk	3190.01	0.812309	6.53342e-10
Ptpn14	6806.86	0.8123	2.47859e-14
Pak1	1454.48	0.811209	3.66333e-06
Zfp36	1397.59	0.80966	0.0471894
Tor4a	194.187	0.809483	0.00551062
Fam110a	459.328	0.808176	0.00554223
Aoc2	159.816	0.807907	0.0126913
Uba7	268.754	0.804331	0.00165953
Junos	162.004	0.80404	0.00825116
Lamc2	395.784	0.803201	0.0142747
Pdzd8	3340.98	0.803004	0.000825627
Erich1	560.534	0.800852	8.7735e-07
Efcab2	42.8309	0.799425	0.0335727
Pdgfc	1278.89	0.799425	1.42304e-05
Tubb4a	66.1147	0.79789	0.0304456
Wwc2	6641.56	0.796279	4.83987e-10
Exoc6	416.782	0.795834	0.000416553
Slc39a13	2542.7	0.795703	2.99917e-05
Lrp8	1552.95	0.795191	0.0400198
Acsl5	3339.88	0.794471	0.00180504
Cd44	4483.25	0.793381	0.000251129
Ifit2	2698.97	0.792314	0.000273658
Cyld	2898.73	0.792178	1.24578e-06
9130008F23Rik	333.961	0.790524	0.00137228
Abcc1	6563.18	0.790424	3.69902e-09
Bbc3	624.09	0.788957	0.000594577
S100a6	44661	0.788402	7.49365e-05
Dkc1	2009.18	0.783425	0.0231427
Cfap69	254.517	0.783021	0.015412
Flvcr1	683.977	0.782966	0.000542847
Ccnyl1	2407.21	0.781657	8.83808e-07
Asap3	387.6	0.780542	0.00407035
Adamts14	1745.13	0.779217	0.010074
Dnajb4	1668.42	0.778905	9.35848e-08
Rasl11a	634.508	0.777164	0.00746999
Fuca2	3318.4	0.774985	1.94742e-05
Myof	24621.4	0.773249	1.06161e-06
Slc25a40	773.25	0.771847	0.00115667
Xylb	84.7051	0.771779	0.0104383
Apcdd1	937.525	0.771057	2.86953e-05
Cdc42bpa	4204.49	0.769973	0.00161559
Stip1	10290.2	0.768558	7.951e-05
Rrp1b	1637	0.76814	1.38403e-11
Gm13092	594.122	0.767635	3.16502e-05
Mlkl	1417.96	0.767012	3.76834e-06
Gm13632	65.5249	0.766729	0.0217453
Pxk	1881.68	0.766221	5.10936e-19
Uck2	2613.5	0.765442	2.69929e-05
Bicd2	3364.55	0.765101	5.09974e-10
Reep4	971.131	0.763851	0.000968857
Spats2l	58.4355	0.763067	0.0391816
Stap2	79.9004	0.76058	0.0221949
9230114K14Rik	104.746	0.759672	0.0325586
Hoxc5	124.722	0.758924	0.0465799
Hdgf	20795.9	0.758303	9.7016e-08
Filip1l	2075.75	0.756835	0.00232937
Ccng1	10250.7	0.756301	1.34111e-05
Ddx11	404.973	0.755948	0.0357858
Slc9a5	964.455	0.755434	0.00345054
Lamc1	22727	0.754139	1.14881e-06
Secisbp2l	3505.58	0.753993	1.88931e-05
Cacybp	3685.28	0.751921	0.0235397
Avpi1	1533.79	0.751294	2.23823e-06
NA	1559.71	0.750988	3.61162e-05
Zfp568	651.051	0.749237	0.0119526
Smtn	3576.33	0.747552	6.29223e-06
Prdx4	3691.06	0.746861	1.31358e-05
Prim1	735.925	0.746105	0.0203197
Clip1	4554.96	0.745605	2.6961e-06
Tnfaip1	4512.56	0.74551	3.26369e-09
Rbpj-ps3	2159.93	0.743402	4.16746e-10
Etl4	562.1	0.742627	0.0160375
Gm4735	2471.2	0.742623	0.00238668
Vcam1	8733.75	0.742579	1.3734e-08
Serpinh1	36919.6	0.742435	3.41769e-05
Glud1	8559.98	0.74107	5.9023e-26
Vgll3	2688.7	0.740636	0.0341348
Cdkn2c	2309.99	0.74034	3.42194e-07
Il10rb	939.898	0.738719	3.7568e-12
Thy1	3489.69	0.738129	0.0022616
Dagla	576.298	0.736731	8.52091e-09
Mdm2	3807.44	0.735753	2.46307e-06
Ube2l6	711.571	0.733952	0.014839
Selenoi	2343.48	0.732737	3.37778e-07
Bcar3	810.138	0.732507	0.00215876
Samd4	3008.14	0.729767	7.87814e-08
Atp11a	5318.33	0.727904	2.26812e-06
Cdc45	743.5	0.727158	0.0498034
Rapgef2	1760.9	0.725985	6.87474e-05
Pidd1	231.843	0.725939	0.0477054
Rad18	808.092	0.725347	0.0160444
Ncaph	1055.33	0.723899	0.0321994
Cfap36	1389.22	0.723575	0.0114953
Pacsin2	4361.92	0.723265	1.50872e-11
Rbpj	6189.69	0.721963	8.70636e-10
Afdn	6938.09	0.721143	2.13245e-05
Slco2a1	4121.36	0.720521	0.000256147
Htra1	323.733	0.720002	8.81147e-05
Syne2	2077.97	0.719636	0.00105051
Gabre	296.546	0.718102	0.0159486
A530040E14Rik	89.2667	0.717044	0.0318691
Esd	14951.2	0.716684	0.00032382
Syde1	3457.47	0.716062	5.90369e-08
Cav1	38978.1	0.71498	1.60498e-07
Tpst2	2312.6	0.714889	4.1702e-05
Cep85	1088.7	0.714393	0.00251972
Gm7102	42.8631	0.713564	0.0353474
Ubr1	1990.71	0.713395	0.00156187
Nedd9	2791.54	0.712691	0.0111468
Ostf1	2423.37	0.711585	2.12263e-11
Wdr62	764.181	0.710785	0.0201907
Creb3	1212.47	0.709991	9.80281e-06
Utp11	3221.33	0.709284	1.92872e-11
Crim1	4958.72	0.708016	0.007291
Tmsb10	24402.9	0.707605	9.87903e-06
Apbb1ip	2739.65	0.704996	0.000625841
Bscl2	225.836	0.702657	0.0275189
Polk	816.699	0.702209	0.00195661
Eif3c	17700.4	0.698375	1.48344e-09
Plcxd1	187.986	0.697773	0.0384439
Prkag2	1252.87	0.697155	1.0573e-08
Paqr3	356.34	0.695992	0.000826406
Lrrc8c	1417.4	0.694827	0.00147121
Wars	2773.82	0.693896	6.86153e-05
Tuba1c	4795.99	0.692635	0.0290309
Afmid	240.574	0.691503	0.0216284
Slc7a2	1073.85	0.691184	0.0359857
Dnmt1	4454.59	0.690492	0.00439696
Stx11	348.399	0.689566	0.000498763
Csgalnact2	1490.92	0.689453	0.000826406
Adora2b	955.538	0.688748	0.00111701
Procr	826.051	0.687026	0.00668481
Tgm2	2829.88	0.68622	0.00127131
Ghitm	11802.3	0.684459	6.46159e-06
Zbtb18	764.626	0.683966	0.0123159
Ephb2	1039.49	0.683946	0.000710926
Itpr1	2029.83	0.683389	4.49073e-05
Fbln5	11686	0.682094	0.00112812
Lpar6	212.976	0.681402	0.0447562
Gstm2	1617.93	0.681333	0.0147539
Pltp	1305.02	0.680155	0.0314507
Lig1	1985.27	0.679248	0.0209746
Pa2g4	8738.52	0.676094	0.000327519
Enpp4	380.571	0.67491	0.00105778
Ifrd2	723.703	0.674025	0.0383218
Nol7	912.346	0.673498	0.000193171
Rapgef3	465.242	0.672822	9.26524e-06
Col1a1	121831	0.66956	0.0257954
Arhgap33	330.241	0.669478	0.0168832
Fzd6	270.123	0.668715	0.00540419
Ldlrap1	698.759	0.668563	0.00111605
Ahr	292.299	0.668085	0.0204302
Calhm2	211.522	0.666844	0.000776197
Dab2	7942.18	0.666582	0.00341957
Tmem128	899.217	0.666114	1.07097e-06
Sptan1	24705.8	0.665906	2.28152e-06
9930012K11Rik	537.673	0.665728	0.00030516
Dnajb1	2104.81	0.664249	0.000700556
Ctnnal1	2217.42	0.664228	0.000679729
Smc5	2503.86	0.662816	0.02834
Hmga1	10223.7	0.66105	0.0357092
Smco4	219.148	0.660792	0.00227439
Slc12a4	4348.57	0.660671	2.47554e-08
Pcolce	25050.2	0.660619	8.81479e-06
Kpna1	2050.9	0.660334	0.0328486
Banf1	3838	0.659779	3.11476e-05
P4ha1	9161.32	0.658943	0.00227043
Alg13	429.283	0.658681	0.00970558
Lrrc75a	924.749	0.658435	2.53632e-05
Gdpd5	258.317	0.657056	0.00231158
Cfl2	7309.76	0.65619	0.000252083
Myl6	22034.8	0.654964	1.12833e-16
Fkbp10	8574.96	0.654805	0.000339917
Gm20404	84.3876	0.654696	0.0387614
Dnaja4	286.777	0.653778	0.0179266
Anxa2	27933.3	0.653277	0.000262784
Esyt1	2873.96	0.652539	6.36317e-06
Nrp1	3718.26	0.652346	0.00167523
Cdk18	2832.68	0.651182	0.00602893
Lamb2	7100.08	0.650603	0.0129741
Gm13977	61.7792	0.649304	0.0328486
Gsr	1627.24	0.649187	0.00078577
Exoc3l4	133.827	0.648512	0.0270413
Orc2	1454.76	0.647715	0.00872213
Sbno2	2509.39	0.647453	0.00011015
Usp32	4236.09	0.647236	0.000913254
Sema4b	529.327	0.647121	3.0514e-06
Pkp4	2837.96	0.646769	0.000524031
Cavin3	2957.83	0.646675	0.00154307
Plod2	1368.67	0.645416	0.00489519
Aplp2	11967.9	0.64527	5.06377e-05
Egln1	2310.54	0.645129	6.10895e-06
Parva	10879.8	0.643263	1.68142e-08
Strbp	1590.73	0.642307	0.000352234
Uchl5	1036.06	0.642287	0.0010994
Gclc	1433.97	0.641001	0.00260688
9530077C05Rik	123.619	0.640612	0.00684562
Elf4	2047.78	0.639948	7.72756e-11
Ldlrad4	327.725	0.63994	0.000342678
Rin1	4778.35	0.63765	0.000209277
Gclm	1768.79	0.636608	7.283e-05
Rars	6691.94	0.635639	6.0646e-06
Pea15a	11198.5	0.635378	2.43867e-06
Fth1	88712.8	0.634404	0.00789688
Tcf20	4460.87	0.634339	2.23677e-08
Msn	18055	0.631435	0.00468421
Lrrk1	3325.76	0.631317	1.89034e-05
Myo19	568.322	0.629438	0.0382959
Hspa5	48769.3	0.627588	0.0212838
Mthfd1l	1964.85	0.627319	0.0392239
Ino80c	526.2	0.625112	0.000663439
Slc19a2	1917.48	0.623645	0.000229275
Sec14l1	5437.38	0.623214	1.15169e-07
Itgb1	37771.6	0.622514	2.52565e-09
Man1a2	4199.12	0.621833	0.000555643
Man2b2	7485.81	0.621213	0.0013766
Cd248	6880.53	0.621115	0.0128794
Agps	3230.02	0.619559	0.000772364
Prnp	14550.6	0.618569	0.00111701
Relt	217.473	0.618511	0.0170501
Rbpms	1460.51	0.617801	0.000182125
Ide	5488.79	0.617548	8.35369e-05
Utrn	8786.27	0.616923	5.24471e-05
Ttll7	695.451	0.615432	0.00747426
Mustn1	214.872	0.615186	0.0411992
Ndc1	2175.2	0.614792	0.0111249
Tle4	360.971	0.614572	0.000790064
Colca2	129.851	0.614542	0.0185518
Snrpf	1289.86	0.614133	0.00234832
Nup43	725.963	0.613926	0.00297384
Dzip1l	1361.68	0.613709	5.62595e-07
Nabp2	2302.58	0.612115	0.000776197
Ppid	3377.36	0.61175	0.00266657
Jdp2	2313.38	0.611165	5.47696e-05
Rpf2	971.375	0.610072	0.0468378
Iqsec1	6250.87	0.609875	0.000100022
Ier5	3710.22	0.609616	0.000418284
H2-Bl	144.296	0.609583	0.016889
Akap12	11002.4	0.608578	0.00937875
Arxes2	825.75	0.608201	0.043677
Sh3bp5	1876.84	0.608134	0.000123432
Cav2	3663.33	0.607956	0.00320556
Map6	3232.03	0.607723	0.00351871
Sqor	2866.17	0.607592	9.33326e-06
Cobll1	2804	0.606575	3.27732e-05
Smurf2	3989.71	0.606498	2.33643e-10
Nudt15	117.4	0.605802	0.0478469
Myl12b	5643.91	0.605429	1.9861e-06
Wwp1	1335.55	0.605241	0.00844601
Vps54	1685.98	0.604894	0.0454405
Clic4	7974.14	0.603736	0.00343064
Glce	2652.83	0.6026	0.00335789
H2afx	1067.49	0.602287	0.0396108
Zfp428	275.33	0.601781	0.00541655
Napb	476.588	0.601487	0.000880201
Mcrip2	335.853	0.601084	0.0262099
Tmsb4x	9263.72	0.600753	1.16841e-05
Aldh1l2	7819.79	0.600731	0.0402472
Ttll4	1807.44	0.598895	0.00701374
Ruvbl2	1919.94	0.598819	0.0174748
Klc1	5592.89	0.597254	2.01594e-08
Nup37	843.575	0.596933	0.00811757
Orai1	454.009	0.596768	0.0183976
Rgs3	1513.57	0.596629	0.0192092
Gm340	499.429	0.595867	0.000597657
Slc3a2	11311.1	0.595664	4.43859e-05
Gsto2	540.367	0.595113	0.024089
C1rb	431.7	0.594248	0.0464505
Sbsn	1060.83	0.59245	0.00130206
Mid1ip1	939.945	0.592429	0.047561
Naaa	680.275	0.590002	0.00485196
Eprs	14576.7	0.589783	0.00103272
Aen	3318.37	0.589223	0.0114146
Prkce	764.757	0.588655	0.000182743
Mthfd1	3288.79	0.587733	0.00255961
Pml	1978.1	0.586467	0.00117224
Faf1	5358.73	0.586203	6.55415e-06
Slc35d1	859.598	0.585569	1.17212e-06
C1ra	10143.3	0.585317	0.0367304
Tmem43	6334.66	0.58509	0.0125098
Usp24	5368.66	0.584704	0.00443209
Gm5921	644.89	0.584238	0.0193309
Ahnak	67844.7	0.583237	0.000186177
Rad23b	17055.9	0.582673	0.000175653
Rassf3	475.971	0.582207	0.00137724
Mbtps2	1552.93	0.581964	0.0362274
Btaf1	2399.83	0.581551	0.00290767
Chd1l	216.343	0.580398	0.0318307
Mrps15	2715.98	0.579131	9.57564e-08
Msantd3	455.089	0.579022	0.0100354
Lin54	751.046	0.578699	0.0311612
NA	4706.05	0.578304	0.000285928
Syde2	1207.49	0.578045	0.00674628
Slc25a33	464.665	0.577263	0.0013332
Chst12	2131.44	0.577257	0.00131291
Dlx2	556.996	0.576455	0.0112874
Lgr4	1019.43	0.576051	0.00610277
Cks1b	1676.27	0.576028	0.0372608
Gm7334	682.963	0.575995	0.000355036
Slc22a23	1141.9	0.575444	0.00335675
Abcb7	679.753	0.573796	0.0148871
Slc20a1	2917.81	0.572657	0.00608164
Suv39h1	1282.54	0.572017	0.0273755
Pear1	2676.77	0.571339	0.000262513
Plec	14666.5	0.57072	0.0215196
Uxs1	2643.99	0.568966	0.000223022
Ppp1r15a	3481.36	0.568394	0.00393641
Nnmt	470.887	0.566919	0.0163307
6330403L08Rik	423.319	0.565679	0.00757435
Cdc34	2896.49	0.56488	0.0040027
Mars	4381.01	0.56451	0.00434017
Col5a1	27771.2	0.564323	0.027938
Cited2	5203.84	0.564287	0.000387744
Xpot	6963.58	0.563442	0.000246453
Ptges3-ps	1167.53	0.563198	0.00930966
Tnfaip8	770.731	0.561875	1.77313e-06
Mlh3	176.758	0.561857	0.0422564
Gtpbp2	2282.05	0.561535	0.000258575
Itpripl2	5913.85	0.561374	6.59173e-05
Myc	3282.76	0.561151	0.00131069
Zfp608	707.21	0.56095	0.00979808
Txndc12	3770.54	0.560502	1.90074e-05
Ap4s1	235.013	0.560106	0.00879843
Asph	3636.47	0.559307	0.000825627
Rasa4	4237.67	0.559247	0.00451546
Pnpla2	1540.39	0.558966	0.026767
Ptp4a2	11669.3	0.55755	4.71346e-05
Nadk2	1271.55	0.555776	0.0115153
Mrip-ps	1177.22	0.5549	0.00335675
Zfpm1	851.748	0.554343	0.00852336
Itpr3	5436.34	0.55407	0.00061612
Snhg15	979.434	0.553648	0.0362731
Sigmar1	2775.96	0.553253	0.00386211
Prim2	794.055	0.553012	0.0464868
Rps6ka3	2296.41	0.55183	0.0170501
Tns2	5211.11	0.550545	0.000463565
Taf15	4039.93	0.549773	0.0133601
Cdh2	5735.01	0.54895	0.00223205
Antxr2	3509.94	0.548367	0.00421468
Dusp3	2333.35	0.546981	0.00354419
Rassf1	1982.54	0.546519	0.000489037
Sos1	2970.65	0.546061	0.000733687
Lsm2	1237.13	0.545465	0.0317916
Tnfrsf12a	4419.47	0.543645	0.0443932
Gata4	849.821	0.543347	0.0155237
Spire1	861.397	0.542894	0.00585319
Ube2s	4362.21	0.542549	0.0368634
Capza2	8096.04	0.542542	0.000436977
Crybg3	324.316	0.542243	0.0196622
Gm7879	315.506	0.541909	0.0454405
Pawr	993.222	0.540144	4.47734e-05
Tinf2	460.588	0.539918	0.0120738
Pgrmc1	9425.55	0.539451	0.000155885
Mgat3	1523.24	0.538594	0.00300729
Pfdn4	874.693	0.537537	0.00051705
Kif24	253.309	0.537347	0.0458858
Map3k20	2221.02	0.535694	0.00100686
Fam177a	1383.29	0.535434	0.00271233
Gm4204	1280.22	0.535336	0.0422485
Rtn4	18961.5	0.535284	0.000249845
Tjap1	2545.04	0.535166	9.38116e-05
Golim4	4417.2	0.533804	0.0105479
Fhod1	1074.98	0.532737	0.000131512
Bmp2k	1711.02	0.53139	0.00104307
Hsp90b1	54806.7	0.530779	0.0179266
Kcmf1	5176.9	0.529997	1.56637e-05
Strn3	4349.36	0.529249	0.0333278
Rab23	1604.16	0.528524	0.00116791
Snrpd1	1590.09	0.528216	0.00796099
Lmbr1l	980.758	0.526186	0.0427986
Smarcd3	630.858	0.525812	1.73093e-05
Nup107	1865.08	0.525191	0.0108022
NA	140.032	0.524688	0.0241914
Arhgdib	13907.1	0.524336	0.00582556
Oxsr1	2997.3	0.52338	0.00018878
Nrip1	567.816	0.523234	0.00548691
Phgdh	14268.9	0.522806	0.0488207
Gm10040	874.67	0.522459	0.000350646
Actn4	15981.9	0.522291	0.000873647
Trappc2	271.711	0.52125	0.0480136
Senp1	2049.74	0.521108	0.000306891
Ybey	168.731	0.520567	0.0432872
Acot7	1795.61	0.520096	0.000493275
Il6st	23732.5	0.52	0.0124654
Pcdh1	2459.62	0.519649	0.003247
Gspt2	338.497	0.518895	0.00105605
Erlin1	2251.34	0.518832	0.000235209
Rfx2	152.466	0.518017	0.033838
Ric1	2773.7	0.517846	0.000103628
Ppm1g	5386.88	0.516716	0.00496775
Sh3bp4	1970.39	0.516195	0.00306348
Gm26578	320.257	0.515503	0.00842659
Tacc1	884.445	0.515411	0.0197709
Plxnb2	19455.3	0.514603	0.000176978
Fkbp2	1281.8	0.514511	0.000582087
Rcc1	1466.07	0.513932	0.0281088
NA	1944.15	0.513817	0.0107454
Jmjd4	1066.64	0.513572	4.19486e-06
Maml1	3478.65	0.512582	2.20412e-07
Enoph1	817.006	0.512471	0.00275203
Vcl	15499.8	0.512372	0.000217246
Otud7b	4504.23	0.511108	2.16769e-08
Tmem259	4431.67	0.511099	3.88243e-10
Gars	14768.9	0.510664	0.00267629
Wasf1	460.337	0.510051	0.000183898
Bsg	26626.7	0.509231	0.0157553
Eif1ad	1505.77	0.509178	0.00330933
Ptprg	2392.26	0.507096	0.0406567
Ctif	1560.76	0.506487	0.000246202
Tmbim1	4932.48	0.505282	0.00311397
Ankrd13c	1592.95	0.505266	2.53576e-05
Mpp5	1955.41	0.504743	0.0446512
Ehd2	12732.3	0.504658	0.000166022
Scmh1	2538.52	0.503672	0.00421468
Ncoa3	2075.84	0.502981	6.12463e-06
Agpat3	4907.69	0.501797	8.07023e-05
Slc6a9	2482.06	0.500896	0.00119513
Gsn	46199.2	0.500544	0.00306152
Gm45713	119.869	0.500231	0.0473337
Stk10	1458.1	0.499663	0.00116788
Sik3	2887.66	0.498659	0.0021528
Lrch1	792.257	0.49766	0.000594212
Wdr74	1689.81	0.49638	0.00588253
Ttc32	115.941	0.496376	0.0426909
Lrig3	1775.7	0.496117	0.0177333
Me1	3504.25	0.495763	0.00135889
Reck	1994.17	0.494901	0.0248333
Dcaf17	807.489	0.49482	0.00305759
Paics	14440	0.494775	1.17069e-11
Tln1	13133.5	0.494008	3.61127e-05
Ubl3	1139.36	0.493923	0.000279397
Col1a2	322977	0.491549	0.0471775
Nus1	4625.39	0.491011	0.000791503
Dlg3	2321	0.490654	5.21057e-05
Acyp2	175.948	0.490617	0.0263986
Ddb2	437.666	0.490509	0.0331235
Ddb1	78266.8	0.489922	0.000287205
Gzf1	2233.83	0.489873	0.0015496
H6pd	4608.68	0.489588	0.0419716
Piga	562.2	0.489343	0.010508
Sestd1	2933.03	0.488299	5.52806e-05
Rap2b	1894.25	0.487268	8.83746e-05
Klf13	2027.3	0.486105	0.005866
2310057M21Rik	364.669	0.485719	0.00238668
Vopp1	3424.57	0.484786	0.00593383
Mast2	8459.26	0.484365	0.00354419
1810037I17Rik	1837.47	0.48374	0.001435
Lzic	586.74	0.483702	0.0203413
Emilin2	6079.77	0.482471	0.000329136
Epn2	3510.42	0.481831	0.01607
Cd47	2998.69	0.481702	0.0142345
Gm9855	2483.95	0.481362	0.000418284
Cars	3768.25	0.481257	0.000657129
Eif2b2	1629.98	0.481133	0.00858501
Pef1	4262.68	0.481084	0.0295808
Heg1	6138.24	0.480875	0.0179683
Card19	646.548	0.480059	0.024089
Slc7a11	1232.29	0.47796	0.00245548
Trip6	4067.67	0.477441	0.0245355
Bcl2l13	3503.68	0.476919	8.53444e-05
Psmd5	3176.61	0.475937	0.00175916
Coq10b	1114.82	0.474472	0.0360087
Trim8	1911.48	0.473258	4.88666e-05
Ywhae	20410.5	0.473213	1.04497e-05
Lsm14a	3705.85	0.471295	0.00117718
Rnf126	1969.76	0.47029	0.00896169
Plekhg2	1751.52	0.469369	0.00172568
Col4a6	6304.76	0.469322	0.00945208
Noc2l	3844.88	0.469169	0.0017897
Adipor1	9075.21	0.467967	0.0171099
Chchd1	748.553	0.4674	0.0084668
Myo18a	2886.63	0.466997	0.0107994
Lmtk2	2086.19	0.466966	1.97864e-05
Hivep3	515.072	0.466961	0.0278944
Pold2	1477.92	0.46686	0.0476211
Larp7	1751.92	0.466499	0.000380228
Aldh7a1	2850.27	0.465509	0.000776197
Dse	4466.7	0.464543	0.0358866
Hsf2	1151.43	0.464063	0.00362358
Usp14	3649.87	0.463881	0.00059217
Plekhf2	391.596	0.462836	0.0192323
Lipt1	375.229	0.462627	0.016068
Apaf1	2157.69	0.462528	0.00840378
Cpd	4849.18	0.461907	0.00283251
Pvr	3501.59	0.461116	0.0425446
Atp1b3	3296.65	0.460673	0.0207115
Utp20	4892.51	0.460333	0.0134903
Crtc3	1345.59	0.460213	0.0194865
Usp12	2202.54	0.459721	0.000636009
Rubcn	3167.97	0.457141	0.000572788
Arhgap17	1804.27	0.456617	2.29975e-05
Nap1l1	24172.5	0.455699	0.000461327
Slc39a14	1634.77	0.455506	0.00470886
Tmem63a	1994.57	0.453944	0.000248132
Zcchc10	277.364	0.453928	0.0321306
Htra2	5540.27	0.453677	0.00121432
Pitpnm1	3326.04	0.453353	0.000139887
Hoxc4	166.514	0.453009	0.0374463
Mnat1	1466.46	0.452347	0.0180333
Hikeshi	958.391	0.452332	0.000559984
Ppic	4106.54	0.4522	0.00158301
E2f4	3205.64	0.451371	0.000155697
Hspa1b	1228.88	0.450549	0.00587127
Map2k3	4419.74	0.450242	0.00949105
Serpinb6a	9297.12	0.449659	0.00066434
Fez2	3426.09	0.449178	0.0371902
Ganab	13601.1	0.449149	6.25605e-05
Tfdp2	1412.09	0.448642	0.0317916
Cuedc1	1729.79	0.448246	0.00270132
Dnmbp	2254.51	0.446672	6.20695e-06
Flnc	35973.8	0.446436	0.0360084
Canx	28016.8	0.44618	0.00457027
Morc3	1497.83	0.445129	0.0223015
Cdc42ep2	2880.64	0.444872	0.0281939
B3gnt2	1006.38	0.443602	0.0234771
Cdk2	961.57	0.441568	0.0124956
Dcbld2	3824.81	0.441522	0.0391595
Rap1b	4653.91	0.440002	9.91342e-07
U2af1	2772.35	0.43978	0.000755279
Tln2	2751.79	0.438816	0.037605
Ap1s2	981.329	0.438577	0.039308
Asah2	1867.36	0.43805	0.0496748
Chka	2275.51	0.438012	0.0327417
Wdr12	1978.77	0.437757	0.0110575
Inafm2	1281.57	0.43744	0.000285295
2019-09-11	12235.3	0.436349	0.00298877
Spen	2670.27	0.436327	0.00109267
Zfhx3	1535.86	0.436133	0.00147174
Kmt5a	3867.37	0.436001	0.00563978
Schip1	526.864	0.43592	0.0318028
Abhd17c	2306.6	0.435752	0.0155817
Xpo5	4096.28	0.435269	0.00833326
Cdk7	2374.92	0.434501	0.00117818
Fam45a	1463.36	0.433958	0.0151087
Galt	472.977	0.432911	0.0221949
Bid	1806.51	0.432805	0.00840823
Ubxn7	3892.88	0.432524	0.00217707
NA	3226.76	0.431813	0.0419584
Necap1	2428.8	0.431073	0.00184627
Fut11	609.835	0.430633	0.0322665
Rhbdf1	3389.18	0.430545	0.0077587
Il17rc	2513.62	0.430381	9.94473e-06
Aph1a	5523.67	0.428249	0.00575455
Btbd19	938.162	0.427717	0.0388831
Caskin2	1078.19	0.426744	0.000314934
Alg6	639.395	0.426435	0.0415971
Cast	5248.56	0.425155	4.36159e-05
Arl4a	298.361	0.424094	0.0120738
Iars	7024.96	0.423863	0.0341157
Scamp5	1179.83	0.421086	0.0111516
Isca2	752.086	0.419543	0.00165953
Nup153	3184.82	0.418391	0.00606693
Abca3	2846.91	0.417658	0.00627671
Hdac7	6665.61	0.415395	3.65493e-06
Pinx1	467.067	0.415021	0.0382706
Dnm2	5735.56	0.41348	0.017335
Pgpep1	2247.35	0.413391	0.0173657
Flot1	2483.62	0.412929	0.0417132
Prdx5	5188.91	0.412344	0.0170501
Fn3krp	425.753	0.411936	0.0160004
Rabggtb	5299.56	0.411729	0.00339422
Mprip	17779.7	0.411162	1.14752e-06
Podnl1	3817.28	0.410744	0.0446033
Sec63	6038.82	0.409963	0.0107413
Thnsl1	299.735	0.409152	0.0428277
Cept1	1366.96	0.4084	0.024314
Dstn	11056.4	0.407883	0.00470781
Apmap	1337.15	0.407495	0.00485737
Nars	9176.22	0.407267	0.0309218
Pigl	298.542	0.40702	0.0146176
Gli3	1922.02	0.405204	0.0270413
Uhrf1bp1l	3287.03	0.404506	0.00199936
Chchd4	753.278	0.403694	0.0358342
1810055G02Rik	1562.5	0.403552	0.0232361
Fzd7	1499.06	0.403296	0.0204026
Piezo1	14797.3	0.403039	0.0239673
Syngr2	2533.95	0.402829	0.00369697
Cwc27	742.855	0.402195	0.0300342
Cers2	6182.42	0.400354	5.21057e-05
Slc7a6	3393.13	0.400195	0.000784015
Gm9531	2715.54	0.399248	0.0239829
Ltv1	1629.78	0.398963	0.0113467
Tmem80	217.739	0.398659	0.0458209
Abca2	3887.22	0.39849	0.00134927
Nfyb	844.281	0.3977	0.01346
Ptpn2	736.858	0.397372	0.0126913
Mfhas1	2892.57	0.397244	3.30732e-05
Tbpl1	1549.16	0.396853	0.00104997
Tpm4	16366.2	0.396786	0.0155029
Txnl1	3876.01	0.396577	0.00136654
Frmd6	6537.82	0.395615	0.0280014
Plod3	6604.23	0.394713	0.0355457
Anxa1	40517.7	0.393288	0.022201
Axl	36075.2	0.39313	0.0253628
Cdc42se2	2787.71	0.392671	4.93224e-05
Notch2	5564.2	0.392415	0.00194253
Peli1	768.521	0.391983	0.0199146
Ppp2r5a	2519.98	0.391679	0.00747551
Dync1h1	28582.8	0.391585	0.00749151
Atn1	9447.78	0.390937	0.0107413
Fam83h	457.876	0.390399	0.0186758
Cgrrf1	795.802	0.389254	0.016371
Zc3hav1	5239.32	0.388809	0.0219354
Ginm1	1392.95	0.388116	0.0243563
Map1a	6290.43	0.388076	0.0206414
Kansl2	5499.26	0.387743	0.0138638
Med25	2722.8	0.387422	0.00551054
Celf1	4225.59	0.386254	0.0219423
Zfp217	1499.5	0.38559	0.00242525
Cdc40	2423.02	0.383674	0.00120993
Tdrd7	1895.99	0.383492	0.00061255
Txn1	10959.5	0.383328	0.0322212
H2-D1	9845.21	0.382637	0.0349941
Smap1	2848.46	0.380421	7.69917e-05
Metap2	6994.69	0.379973	0.0107413
Cfap298	524.766	0.37963	0.0195024
Crlf3	1281.73	0.379224	0.0321306
Nck1	1126.63	0.378664	0.042979
Vps36	2824.13	0.376592	0.00218715
Zfp91	7065.38	0.375331	0.00318375
Nsmaf	1785.08	0.374332	0.00240176
Nid1	41135.2	0.373297	0.00244318
Mknk1	2154.36	0.372791	0.0121668
Qk	4353.56	0.372726	0.0379299
Stag1	2203.34	0.372524	0.0394886
Ube2j1	2831.92	0.372423	0.000103587
Usp10	2331.73	0.371031	0.00919074
Tnk2	5977.18	0.370482	0.0131419
Rad23a	3073.22	0.370378	0.0193696
Lsm4	1011.08	0.369949	0.0254096
Eaf1	2071.8	0.369712	0.0079967
Erap1	966.345	0.36949	0.00931732
Sipa1l3	3854.93	0.369403	0.0119072
Ppp1r12c	1921.83	0.36835	0.00225453
Lrp11	3762.57	0.367997	0.0230731
Hmgn1	7690.88	0.367486	0.043677
Trak2	2626.58	0.364817	0.00923509
Cpne3	3705.75	0.363421	0.0340988
Ptpn11	9188.84	0.36314	0.030429
Tab2	5843.04	0.362128	0.000164527
Gltp	1692.54	0.360553	0.0475418
Mrpl21	1397.63	0.360537	0.00177591
Uvrag	2392.79	0.36023	0.0360724
Mthfsd	1470.29	0.360229	2.07793e-05
Pdia6	14361.8	0.36018	0.030961
Tmem201	1116.38	0.360024	0.00297384
Cyfip1	6745.9	0.359469	0.00112156
Itgav	6626.65	0.358119	0.0403765
Gpsm2	2322	0.357756	0.0395148
Phka2	2086.32	0.357685	0.0288449
Dolpp1	505.602	0.356838	0.0357648
Gng12	10176.6	0.356338	0.0406978
Fuz	552.498	0.35622	0.0418306
Prrc2c	11572.9	0.354228	0.0237276
Higd2a	2214.02	0.35413	0.0436414
Grk2	3292.24	0.353835	0.0109358
Rtn3	10304.3	0.351591	0.0395148
Osbpl9	6203.98	0.351267	0.00179939
Tmem131	4629.57	0.350538	0.00018878
Zrsr2	1460.69	0.350272	0.00857786
Mrps28	608.745	0.349256	0.0431935
Ccdc43	996.76	0.348263	0.0041893
Vars2	1444.71	0.3471	0.0103107
Prmt5	1974.84	0.346914	0.0349668
Ankib1	2741.45	0.34633	0.0125113
Nucb1	11251.8	0.345266	0.00970558
Stat6	5625.01	0.343219	0.000152801
Socs6	1293.8	0.341996	0.0106975
Hipk1	4679.27	0.340748	0.00268895
Atad3a	1366.86	0.340374	0.0362299
Mgat2	2476.64	0.340055	0.0220742
Camk1	3159.84	0.339968	0.0401092
Tubgcp3	2045.21	0.339491	0.00686414
Atl2	1798.46	0.338753	0.0142644
Gde1	1219.07	0.33813	0.0044381
Cactin	1721.15	0.337095	0.00649126
Snx15	878.822	0.335927	0.00444683
Uso1	6535.45	0.335503	0.0479462
Ptpmt1	905.176	0.33515	0.0496748
Dvl1	2494.32	0.334984	0.0427884
Gemin2	424.644	0.331924	0.0313492
Wdr44	567.308	0.330506	0.0479169
Pgd	3686.53	0.330041	0.0211353
Yrdc	1246.31	0.32727	0.0239798
Ipo5	14120.8	0.326844	0.0453023
Fbl	2993.7	0.325248	0.041329
Tsku	1205.34	0.324722	0.0342155
Tial1	1884.71	0.324502	0.0476217
St7	1024.71	0.323012	0.0423832
5430416N02Rik	1000.53	0.322051	0.0304456
Cpsf4	763.092	0.320479	0.0454556
Pfdn1	1895.19	0.318354	0.00913538
Emc6	1268.95	0.318337	0.00281911
Gypc	1383.77	0.318012	0.0303858
Psma1	3673.37	0.317757	0.00376472
Hspa9	32616.3	0.317586	0.00672568
Ctbs	628.373	0.317501	0.0284816
Pnpla6	1143.85	0.317134	0.0175988
Zzef1	3506.29	0.316557	0.0060249
Utp23	570.547	0.316125	0.00545718
Paf1	1759.69	0.314427	8.83983e-05
Gm13835	2487.73	0.314218	0.0474725
Sash1	2475.13	0.313822	0.028144
Rnf145	4349.17	0.313637	0.00296009
Ube2j2	1199.24	0.313404	0.0304631
Pdcd6ip	8464.99	0.312725	0.00138661
Drap1	6991.13	0.310429	0.0478188
Axin1	4077.02	0.306997	0.00734867
Ercc4	754.504	0.305535	0.0462195
Zfyve9	2465.72	0.30457	0.0108084
Gm8116	1189.5	0.303705	0.018639
Magoh	2065.07	0.303463	0.0232174
Phykpl	589.429	0.30196	0.038071
Spop	6108.04	0.300934	0.0044381
Pdcl	1348.65	0.299646	0.0125511
Zfp598	2577.34	0.298187	0.0422288
Dimt1	665.64	0.298136	0.0168213
Cdk11b	2039.57	0.297261	0.00889597
Cmtm6	929.673	0.296003	0.0320845
Psmd1	10295.5	0.295756	0.0454742
Ptk2	4021.59	0.295739	0.0151169
Exoc8	988.866	0.294547	0.0355004
Ccdc12	559.769	0.294453	0.047852
Mbd2	1918.45	0.293325	0.0050327
Tars	6511.29	0.29324	0.0194947
Tacc2	2141	0.292853	0.0156018
Tep1	1733.77	0.29142	0.0421625
Rwdd1	3045.16	0.290073	0.0241625
Gnb1	10433.3	0.287917	4.99687e-05
Ube2f	1729.36	0.287632	0.0395273
Calm2	10854.3	0.286369	0.0206414
Fyn	3259.62	0.285138	0.0136019
Rab8a	3357.26	0.284574	0.0479493
Tpbg	2142.11	0.284415	0.0285535
Otub1	4405.54	0.28364	0.0434023
Cdk17	1107.51	0.2823	0.0276422
Usp6nl	1363.08	0.28179	0.0313207
Dag1	10803.4	0.281509	0.0325301
Sec23b	2213.11	0.281461	0.0161438
Wwtr1	5195.54	0.278025	0.00171679
Fam102b	2904.55	0.276223	0.027136
Itprid2	2850.83	0.273018	0.0339999
Rnf19a	1760.08	0.272853	0.00780329
Comt	3881.09	0.272273	0.0350565
N4bp1	3589.99	0.271978	0.00216366
Srpk1	4585.42	0.270092	0.0295683
Clcn5	3296.84	0.26565	0.00342632
Pdha1	9868.08	0.263093	0.00989784
Arhgef17	6255.35	0.262655	0.0366036
Cwc15	2545.72	0.262267	0.00889447
Zdhhc5	4681.47	0.26194	0.0225639
Socs7	1466.78	0.259299	0.0391816
Nvl	1837.41	0.255871	0.0121606
Dync1li1	2155.25	0.255621	0.0362274
Gpx8	2857.9	0.254299	0.00951604
Slc9a1	2227.4	0.254078	0.0366152
Cpne1	5044.13	0.253065	0.00556566
Heatr5a	3537.03	0.25014	0.00864818
Elk3	4455.88	0.249624	0.0170037
Zdhhc16	1645.02	0.248697	0.0308188
Ccdc59	1338.79	0.24623	0.0308228
Sri	3410.65	0.24592	0.0266458
Pan2	1537.47	0.244897	0.0325612
Ahcyl1	10647.4	0.244841	0.00418303
Plgrkt	1248.26	0.241623	0.0161947
Supv3l1	1487.78	0.241073	0.0251669
Morn4	760.249	0.239024	0.0365205
Slc38a1	5119.47	0.228384	0.0338346
Timm17a	2158.37	0.218141	0.0365508
Tram1	2081.46	0.216168	0.0464868
Zfp106	11251.1	0.196469	0.0151192
Appbp2	3439.9	0.194046	0.0191567
Cnot2	3155.02	0.192406	0.0284681
Ube3b	6295.63	0.191472	0.0464868
Nfatc3	4109.58	0.161075	0.0218974
Uri1	1845.88	-0.160333	0.0345333
Zfp110	1694.47	-0.179324	0.038618
Mgrn1	4288.65	-0.1812	0.0498134
Brd1	2882.28	-0.183079	0.028144
Tgfbrap1	1916.49	-0.187987	0.0438787
Kansl3	3444.87	-0.201356	0.0470816
Stx12	1913.74	-0.203201	0.0479493
Akap10	1520.8	-0.20433	0.0304456
Msl1	3847.05	-0.205029	0.0169993
Cog7	1094.29	-0.205695	0.0448672
Fem1c	1546.41	-0.209416	0.0292062
Adh5	4642.33	-0.211643	0.0402188
Cttn	14805.1	-0.215312	0.0125376
Abcd3	3631.05	-0.216322	0.00776542
Pknox1	1152.19	-0.216491	0.0474725
Ppp1cc	8121.67	-0.220098	0.0477968
Atxn7l3b	7440.58	-0.220844	0.0488154
Fam193a	2712.38	-0.222852	0.0458998
Msantd4	1976.49	-0.224189	0.0141474
Slc30a7	2473.29	-0.225837	0.0222024
Ppp6r2	1188.01	-0.226816	0.00450842
Sdha	7204.47	-0.227626	0.0264047
Fbrs	1611	-0.231424	0.0429862
Psmd10	850.288	-0.233455	0.0337407
Dhx57	1977.79	-0.234318	0.0284816
Erc1	3022.32	-0.235768	0.00989831
Xpo7	3778.84	-0.236815	0.0350474
Glyr1	5537.26	-0.238389	0.0350707
Atp5f1	8259.42	-0.238481	0.0308161
Sppl3	3400.32	-0.241034	0.0339999
Dmac1	1447.81	-0.242822	0.020044
Gdap2	944.635	-0.243101	0.0431964
Ccdc91	1289.12	-0.243927	0.0423036
Trappc11	2425.13	-0.244608	0.00548044
Sde2	2069.82	-0.245281	0.0400864
Stk25	4558.97	-0.246499	0.00788132
Phf2	3036.05	-0.246702	0.0264332
Arl2bp	3849.91	-0.248608	0.0431771
1600012H06Rik	1609.68	-0.249273	0.0308228
Rab3gap2	4136.32	-0.251896	0.0479462
Ppt1	7244.15	-0.252442	0.0398818
Rab11fip3	2701.59	-0.253104	0.0225292
Gpalpp1	1808.31	-0.254105	0.0290849
Aagab	1352.17	-0.254251	0.0399958
Fam53c	2241.69	-0.255914	0.0133895
Rab24	1438.55	-0.257496	0.0238061
Taf2	2167.71	-0.257924	3.74638e-05
Fam114a2	3449.45	-0.259978	0.00325475
Slc31a1	3001.89	-0.260074	0.000768987
Yap1	5868.32	-0.260228	0.00138661
Fam149b	889.386	-0.260892	0.0110159
Dlg5	3568.44	-0.261069	0.0141907
Ipo8	2808.34	-0.263994	0.0422564
Chd4	15088.8	-0.264468	0.0110486
Map3k12	890.702	-0.264611	0.0348176
Ap3d1	7686.89	-0.26551	0.00350217
Carm1	4057.02	-0.265582	0.0393882
Tmem9b	1153.31	-0.265802	0.0350707
Impa1	1974.05	-0.26671	0.0421625
Zfp869	866.216	-0.266722	0.0287629
Tbx18	1240.53	-0.266756	0.0209297
Tmed8	1367.15	-0.268563	0.0446028
Slc25a12	2589.92	-0.26922	0.0461427
Cep68	2000.68	-0.26953	0.00334358
Ulk2	3079.24	-0.27013	0.00384628
5730409E04Rik	1776.75	-0.270315	0.0348587
Dctn1	6439.94	-0.270387	0.0383218
Ap2s1	2093.82	-0.270413	0.0492069
Cript	1250.41	-0.270763	0.0449081
Cep19	695.465	-0.271258	0.0218788
Mafg	3468.76	-0.271294	0.0337407
Zfp746	1625	-0.271573	0.0148453
Pcsk7	888.835	-0.271856	0.0218164
Ppp3ca	3841.87	-0.271899	0.0431516
Prdm5	1471.44	-0.272043	0.0382959
Atp9b	2468.97	-0.272121	0.0157967
Mus81	696.697	-0.273205	0.0160841
Ehmt1	2812.1	-0.27358	0.00672568
Mtmr3	4507.12	-0.273582	0.0395148
Hadhb	3032.97	-0.27535	0.00570487
Pip4k2b	4426.45	-0.275433	0.00649558
Stk38l	824.657	-0.27577	0.0349941
Synj2	1645.38	-0.275899	0.00788132
Umad1	626.353	-0.276304	0.011417
Clec16a	2108.07	-0.278667	0.00131069
Nedd4	84397.1	-0.27892	0.0358866
Adar	2479.58	-0.28041	0.0375076
Kif3c	2739.17	-0.28093	0.00876502
Mllt1	2904.39	-0.281031	0.0351257
Ndufaf7	1011.2	-0.28149	0.0421475
Anxa4	8612.76	-0.281604	0.0179729
Fam118a	816.166	-0.282062	0.0440181
Ift52	1834.56	-0.282739	0.0246154
Cmpk1	3161.86	-0.283362	0.00462181
[truncated: 1,654 more rows]

## Sheet: DEgenes_NIH3T3_CAMTA1_vs_subEV
Gene	baseMean	log2 Fold Change	padj
S100b	13.4966	6.50358	1.55157e-08
Nr1i3	116.726	6.18949	0.000707795
Gm21293	16.493	5.81759	0.00329869
Vwa5b2	28.5676	4.92549	6.10601e-10
NA	26.0631	4.74724	3.79864e-08
Slc6a12	232.627	4.23493	0.0362431
Gm38393	571.023	3.91348	5.32067e-41
Lgr6	16.1482	3.79762	0.00167127
NA	188.127	3.51768	1.10701e-06
Fmo3	67.83	3.45252	0.00148669
Anxa8	232.838	2.83937	0.00024384
Calcb	38.5236	2.71497	0.00856186
Scn1b	147.616	2.68782	3.85886e-21
Tubb3	51.3541	2.68194	2.83393e-09
Peg3	3145.5	2.60975	5.86047e-36
Gpr149	14.6759	2.4494	0.0204598
Macc1	17.4005	2.40656	0.0319571
Dock8	275.29	2.40511	1.83197e-07
Ripk3	33.3137	2.37841	5.26146e-06
Prtn3	13.258	2.36195	0.0375897
Ces1g	19.455	2.33576	0.00273493
Enkur	17.5217	2.31176	0.0310559
Klra4	79.2878	2.3088	0.00112319
Nr4a1	921.089	2.29669	5.30005e-07
Cacnb4	40.6066	2.2837	0.00050137
Ptprq	158.596	2.20705	0.0208283
Adgrg6	18.6663	2.20676	0.000216823
Klk8	65.8813	2.19596	4.325e-05
Rarb	39.2521	2.1763	9.44411e-07
Hes1	186.857	2.15105	0.000954345
Nr4a3	32.3527	2.07215	0.00556604
Hmcn1	25.3193	2.051	0.0271971
Camta1	704.168	2.01148	2.46671e-28
Ica1l	23.4277	2.00567	0.00940252
Nap1l2	52.4546	1.9882	9.14871e-06
Inmt	199.452	1.97653	0.00022219
Vnn1	94.9677	1.95753	0.00857316
Slc4a4	911.507	1.95735	3.24123e-14
Pmaip1	85.1552	1.94302	0.000294536
Mfsd6	21.5132	1.94111	0.0261815
3830403N18Rik	23.8022	1.91364	0.00254922
2310002F09Rik	28.5421	1.9081	0.00723688
Btn1a1	43.1525	1.89646	0.036885
Ptgs2	3952.83	1.8898	0.0014439
Haglr	19.131	1.85282	0.00306174
Atg9b	216.608	1.83181	0.00856186
Klhl30	170.201	1.82646	0.00193084
Dusp27	32.8036	1.76004	0.0305719
Ahi1	1541.58	1.73311	3.05311e-23
Rnf128	22.0282	1.73211	0.00791198
Thbs1	56074	1.69724	2.21431e-05
Gm6736	924.298	1.68497	0.000114627
Ang2	58.0556	1.67756	0.00786416
Disp2	132.671	1.59896	6.56908e-08
Akr1b3	27184.1	1.59513	4.85246e-05
Trim36	26.6235	1.5891	0.0124234
Npr3	1290.29	1.5847	0.00311978
Dhrs3	1200.16	1.58104	0.00207852
Angpt1	126.203	1.57781	0.0394472
Ica1	26.0975	1.5469	0.0239878
Gm12840	2928.57	1.53243	0.038206
Cst6	60.2186	1.52826	0.00158626
Gm12138	2019.19	1.52482	4.66826e-05
Fam57b	17.9566	1.51659	0.0223342
Serpinb9b	3482.51	1.50563	0.00250385
NA	87.8527	1.50552	0.011647
Mgat4a	25.5878	1.47657	0.0446677
Mamdc2	140.42	1.45951	0.000179009
Lims2	179.016	1.45241	0.00443367
Slc6a15	33.4923	1.43697	0.00922295
Nes	211.71	1.42857	0.0398143
Cgnl1	1941.4	1.41319	0.00268221
Lynx1	1430.14	1.40014	1.05236e-19
Omd	64.4194	1.37294	0.0424599
Adamts9	285.326	1.36551	0.0018694
Aldh1a1	6563.73	1.36166	0.00624469
Rab27b	133.451	1.35668	0.00254922
Plscr2	362.9	1.34212	0.00328051
Cavin2	13533.1	1.34082	0.00223826
Klf4	2396	1.32491	1.00144e-10
Camk2a	97.0639	1.31647	0.0204598
Gm773	40.148	1.3128	0.0368869
Plxna4	92.7583	1.28939	0.0337522
Magee1	2530.57	1.27199	3.6857e-26
Prorsd1	28.6761	1.26692	0.0264279
Tmeff2	105.296	1.26663	0.0375897
Phospho1	692.185	1.25112	0.000943103
Krt80	423.338	1.20737	0.00175076
Gm20400	779.139	1.20283	0.0239878
Nexn	586.759	1.19066	0.0479511
Vmn1r-ps128	315.81	1.18689	0.0237105
Gm12505	700.528	1.18545	0.00815717
Gm26809	35780.5	1.18479	0.00459952
Adcy7	42.4627	1.17732	0.0239878
Tnfaip3	769.744	1.17392	0.000241992
Gm17024	26.1838	1.16897	0.0456313
4930486L24Rik	435.539	1.16664	0.0259736
Itgb7	197.254	1.16655	0.0198575
Mpzl2	41.7926	1.16234	0.0310065
Slc30a1	484.757	1.15835	0.0387294
Ifi47	69.2341	1.14598	0.00342718
Map1a	6290.43	1.13079	1.97177e-14
Pcdh9	103.423	1.13074	0.0371212
Fetub	34.8445	1.12325	0.0366712
Dusp4	2570.48	1.12133	0.00378474
Phlda1	939.969	1.12081	0.000674772
Eml2	184.966	1.11986	0.00459952
Grem1	116.249	1.1041	0.000707795
Rin3	39.4385	1.09535	0.0147371
Styk1	452.367	1.08913	0.00550846
Gm14137	67.1926	1.08814	0.000743767
Rasgrp3	117.912	1.08722	0.0029016
Olfm1	251.978	1.0846	0.0429403
Cystm1	169.287	1.06454	0.0447045
Lamc2	395.784	1.06055	0.00259443
Endod1	423.569	1.05932	2.03282e-05
9930111J21Rik2	470.863	1.05924	0.0375264
Crim1	4958.72	1.04978	0.000190772
Snta1	63.9187	1.04942	0.0179648
Gm19705	81.4969	1.04124	0.0130238
Xylb	84.7051	1.04038	0.000236063
Slmapos2	3326.36	1.02967	0.00550846
Snhg11	55.417	1.02934	0.0495726
Tril	35.0587	1.02704	0.0131707
Sulf1	1797.81	1.02563	0.0117941
Gpat3	333.521	1.02513	0.000294536
Ly6a	4142.02	1.02438	0.00150478
Slc40a1	380.187	1.02425	0.038206
9830144P21Rik	73.2082	1.01857	0.0325177
Malat1	24972	1.01146	0.0264658
Gprc5a	2003.57	1.00339	0.00941148
Clu	185.671	1.00052	0.0281409
Atp1b1	1462.53	0.99861	0.00010033
Ly6c1	1095.47	0.997198	0.000634042
Tgm2	2829.88	0.993121	5.1767e-06
Ppargc1a	542.904	0.992564	0.0424599
Thrb	322.121	0.989484	0.00809417
Spry4	239.43	0.983892	0.00720497
Tnxb	839.043	0.97682	1.11912e-07
Gchfr	290.926	0.973864	0.00810782
Loxl4	984.285	0.966247	0.00391875
Crabp1	530.683	0.958943	0.0125035
Nqo1	596.467	0.955969	0.0238761
Gm14410	104.819	0.951658	0.0405356
Etl4	562.1	0.945074	0.00580137
Fam198b	10855.8	0.935121	0.00104868
Slc2a6	121.788	0.933234	0.0112963
Dpysl3	7094.57	0.931763	4.41265e-05
Dusp1	2323.36	0.929583	0.0329498
Pitpnc1	829.298	0.919756	0.00464529
Hspa4l	3271.54	0.915309	0.00512668
Dock4	204.616	0.911723	0.000548763
Ano3	117.044	0.908945	0.010117
Ercc6l2	120.823	0.908769	0.00944844
Krt7	1408.92	0.89521	0.0482659
Plk3	880.618	0.875875	1.04706e-05
Dmxl2	711.167	0.873656	0.0375897
Clip4	144.43	0.872149	0.00378474
Sema5a	3228.14	0.870017	0.018059
Mir22hg	1001.83	0.865336	0.00637236
Epha2	1944.11	0.861773	0.0478967
Specc1	3432.28	0.861409	0.000123825
Tinagl1	7597.99	0.853786	0.00857316
Stap2	79.9004	0.846984	0.0132843
Irak2	771.003	0.844894	1.18165e-05
NA	101.866	0.84174	0.0405356
F8	92.0513	0.841695	0.0478202
Cpeb4	981.958	0.833102	0.014554
Slc7a2	1073.85	0.82717	0.0314426
Skil	1068.68	0.825645	0.00391875
Filip1l	2075.75	0.820688	0.00419458
Aox1	478.059	0.812211	0.000959302
Col12a1	2667.38	0.808893	6.13507e-07
Cpeb3	346.758	0.808221	0.000551024
Mfap3l	581.845	0.803371	0.0274613
Mtmr10	1541.37	0.795696	0.000387366
Rhox5	444.766	0.79432	0.0448766
Cpeb2	370.5	0.793096	0.00256534
Herc3	407.835	0.789699	0.00273493
Slc20a1	2917.81	0.784923	0.000551024
Ppfia3	146.669	0.782649	0.0232838
Trim16	1755.35	0.778454	0.000411045
Prkcg	214.771	0.773397	0.0209327
Maoa	11869.7	0.771023	0.00114212
Aim2	214.759	0.768408	0.0124234
Tcaf2	513.739	0.766615	0.0208283
Sorbs1	833.086	0.765271	0.00104868
Pde8b	714.994	0.76526	0.010117
Zfp53	773.896	0.763467	0.0383236
Errfi1	2068.09	0.762213	0.00856186
Pqlc3	1007.22	0.762197	0.00019115
Prepl	2110.74	0.755638	1.38084e-14
Cndp2	2438.22	0.755565	0.0375897
Gm10125	80.425	0.754366	0.0405356
Tspyl4	789.28	0.744193	0.0392459
Bdnf	1365.54	0.744091	0.00829355
Ahr	292.299	0.741439	0.0238761
Nr4a2	174.197	0.740174	0.0273129
Cthrc1	357.534	0.735141	0.00384421
Cacna1c	477.688	0.730046	0.00873406
Limk1	1848.01	0.722704	0.00190115
Dbndd2	321.974	0.705251	0.0428832
Zrsr1	2272.8	0.704389	0.0136779
Ier3	749.798	0.701418	0.0495726
NA	1944.15	0.699374	0.00150478
Srsf5	9108.14	0.693018	0.0250786
Gsto2	540.367	0.691942	0.0257906
Prr5	206.04	0.691256	0.0238553
Acsl4	2428.09	0.690542	0.0491637
Kank1	1147.22	0.689249	0.0117513
Dst	14726.7	0.688945	0.00264884
Fblim1	958.475	0.686704	0.00466402
Prss23	12096.7	0.685602	0.00193084
Coq10b	1114.82	0.685582	0.0056677
Gbe1	696.83	0.684735	0.00550846
Hoxa4	123.194	0.683803	0.0248891
Slco3a1	1020.79	0.672204	0.0051742
Map1b	6864.42	0.666968	0.00150478
Slc22a23	1141.9	0.664578	0.0029895
Tecr	7238.64	0.662193	0.00010033
Ptgs1	3977.96	0.660529	0.00594873
Anxa3	7482.76	0.653436	0.046972
Dgke	540.558	0.653141	2.22931e-05
Nktr	4432.71	0.652589	0.0387294
Hotairm1	163.786	0.650502	0.0371212
Vps13d	2923.79	0.649926	0.00356127
Zfp36l2	7867.3	0.648001	0.00511537
Haghl	919.209	0.644405	0.000959302
Ifit2	2698.97	0.642707	0.0179648
Man1a	1574.81	0.641725	0.038206
Usp53	923.269	0.637905	0.0325748
Tsc22d2	3177.02	0.637311	0.0142815
NA	83.4286	0.636445	0.0306431
Itga6	3086.58	0.635116	0.0021464
Abca5	1770.48	0.627519	0.0432923
Chuk	2436.93	0.617966	0.00720497
Klf7	2129.13	0.615162	0.00568994
Lin7c	1704.72	0.60957	0.0383803
Chfr	2461.95	0.603696	0.00898242
Plod2	1368.67	0.601427	0.0343994
Akap12	11002.4	0.600957	0.0364605
Mtus1	3124.59	0.600451	0.0425745
Esyt1	2873.96	0.596112	0.000370937
Fuca2	3318.4	0.59441	0.00829355
Swap70	2724.18	0.592598	0.00256534
Net1	1218.27	0.591566	0.0064636
Efna5	479.729	0.590129	0.0294573
Gdpd5	258.317	0.577501	0.0384444
Irgm1	1281.38	0.576328	0.000521465
Ggact	310.702	0.574985	0.0444368
Snapc5	308.312	0.568604	0.0441507
Lrp1	57751.8	0.56569	0.0141515
Gsto1	9133.18	0.56545	0.0337061
Irf2bpl	2111.47	0.563463	0.00150336
Abca3	2846.91	0.561795	0.000744942
Fam13b	1672.29	0.56111	0.0282529
Lpp	7312.74	0.561079	0.00533469
mt-Atp6	187651	0.559457	0.00654337
Anxa1	40517.7	0.557069	0.00295901
Sgms2	1191.81	0.555721	0.0044436
Fig4	2668.68	0.54628	0.0105812
Anxa6	6987.12	0.543667	0.0293756
Klc2	1334.11	0.542918	0.000707795
Abracl	1310.99	0.539983	0.0172131
Osbpl8	1429.94	0.539261	0.039966
Ppp1r12b	4138.33	0.536531	0.00812499
Vcl	15499.8	0.531813	0.000805652
Lactb2	1674.43	0.529101	0.0238553
Myo6	987.17	0.528319	0.013123
Nfat5	11459	0.527197	0.012701
Flot1	2483.62	0.524726	0.02395
Atp6v0a1	3975.63	0.522019	0.000551024
Impact	6753.39	0.520921	0.0202882
Hoxa5	641.171	0.520327	0.0224242
Txnrd1	11050.7	0.519186	0.0392459
Tmsb4x	9263.72	0.513275	0.00161326
Ttc39b	2306.34	0.513077	0.0446677
Fhl2	3219.08	0.510112	0.0194308
Nipa1	460.542	0.510033	0.0210977
Bcl2l1	4294	0.499951	0.0297344
Optn	361.568	0.498257	0.0375897
Etfrf1	953.992	0.497341	0.0150692
Tjp1	4773.97	0.496974	0.0198495
Myo5a	10004.3	0.490852	0.0368869
Tle4	360.971	0.489938	0.0370106
Hipk2	2809.34	0.488962	0.0174813
Cldnd1	2104.13	0.487368	0.0044436
mt-Nd1	144168	0.487043	0.0310559
Cpt1a	5815.36	0.479621	0.000205653
Ermp1	2303.62	0.478618	0.0161476
Acyp2	175.948	0.477441	0.0447045
Myh10	12571.3	0.471895	0.0137177
Vegfa	2252.33	0.471454	0.0151474
F2r	8616.17	0.471257	0.00252455
Golga4	4342.99	0.47018	0.0337522
Tmod3	2418.24	0.466617	0.0460558
Sptan1	24705.8	0.466202	0.00828869
Birc6	8702.31	0.465705	0.0370891
Slmap	3527.38	0.465323	0.0334914
Ahnak	67844.7	0.463943	0.0172131
Armcx1	1688.16	0.460767	0.0436549
Tmf1	2643.36	0.460662	0.0407069
Hk2	3039.31	0.459398	0.0394472
Avpi1	1533.79	0.459243	0.0232838
Mef2a	1661.81	0.454987	0.0127826
Flnb	18993.6	0.451455	0.0294573
Afdn	6938.09	0.445323	0.0487275
Pkd1	8593.73	0.444525	0.000551024
5031425E22Rik	290.545	0.443829	0.029048
Synj1	1193.43	0.439462	0.0457986
Pikfyve	2011.64	0.435672	0.0343994
Csrp1	2952.74	0.435055	0.0051742
Cnn2	23457.3	0.430092	0.00856186
Lats2	3075.23	0.429198	0.0405356
Stx3	1465.82	0.428911	0.0264658
Tbk1	1987.79	0.427411	0.0453862
Cited2	5203.84	0.420397	0.0375897
Ehbp1l1	2904.93	0.419072	0.0099054
Ostm1	1935.94	0.418951	0.0409658
Prkdc	1324.77	0.416984	0.0387294
Wwc2	6641.56	0.411414	0.0146661
Calm1	13158.2	0.409231	0.0306431
Eya1	701.829	0.406537	0.0107283
mt-Co2	249818	0.406246	0.00475914
Myh9	47052.3	0.405066	0.0204598
Pls3	9293.72	0.4014	0.000551024
Cast	5248.56	0.398801	0.000969831
Runx1	1094.06	0.397394	0.010117
Kif1b	4905.83	0.394955	0.00307177
Yipf6	840.49	0.389696	0.0152295
Pgd	3686.53	0.389675	0.0179648
Wdr7	1610.4	0.388421	0.0181153
Ttc19	1089.86	0.378306	0.0296789
Abi1	4282.06	0.37636	0.0349158
Tpm1	28225.3	0.37235	0.0209302
Slc25a16	1028.92	0.36882	0.0377553
Golgb1	5482.12	0.36726	0.030222
Picalm	6753.45	0.36615	0.0477324
Lrrc58	3830.13	0.365891	0.0324162
Pdlim5	5330.34	0.365746	0.0448766
Osbpl9	6203.98	0.356517	0.00720497
Klf6	6415.95	0.351056	0.00856186
Slc26a2	908.018	0.350738	0.046614
Mus81	696.697	0.348538	0.00431743
Pxk	1881.68	0.346892	0.00180891
Epb41l3	11414.4	0.346348	0.0051742
Ehbp1	2247.79	0.336644	0.0371212
Stk38l	824.657	0.336586	0.0230776
Als2	1499.84	0.33501	0.0423093
Mia3	7047.79	0.332289	0.036308
Tulp4	16880	0.327094	0.0294573
Iqgap1	14617.6	0.322179	0.0159661
Nt5c2	1953.18	0.319065	0.004532
Itprid2	2850.83	0.317015	0.0376676
Cdr2l	1223.89	0.314485	0.00810782
Calm2	10854.3	0.312725	0.0343305
Gnaq	3219.88	0.311964	0.0152295
Cdk11b	2039.57	0.310246	0.021771
Gpd2	3642.52	0.309277	0.0204598
Slc38a1	5119.47	0.288402	0.0186215
Ndufa4	6517.05	0.282941	0.0106732
Herc2	5066.07	0.257452	0.0239781
Reep3	3673.17	0.253586	0.0414602
Arf3	7135.49	0.224435	0.0175334
Cltc	24544.1	0.184389	0.0328849
Kdm1a	3091.89	-0.208497	0.0424599
Zfp639	1185.95	-0.227643	0.0375897
Dgkd	3573.21	-0.228728	0.0495726
Gmcl1	1500.2	-0.229642	0.038206
Sun1	4858.8	-0.232055	0.0373151
Fam114a2	3449.45	-0.238018	0.0294573
N4bp1	3589.99	-0.243986	0.0271971
Zfp687	1806.06	-0.246551	0.0490967
AI597479	1129.33	-0.258028	0.00898242
Cdc23	2628.54	-0.260467	0.0105372
Gng10	2800.64	-0.263715	0.0444368
Zfp110	1694.47	-0.267103	0.0044429
Dnmbp	2254.51	-0.269471	0.041431
Msl1	3847.05	-0.272745	0.00440207
Cdk10	1543.46	-0.27662	0.0375897
Rnf145	4349.17	-0.289844	0.0264272
Mbtps1	9771.01	-0.297763	0.0364605
Srsf9	1778.89	-0.29883	0.0115316
Zfp768	743.703	-0.302688	0.0393061
Pip4k2b	4426.45	-0.303791	0.00973713
Smo	9359.59	-0.305696	0.0263237
Cep68	2000.68	-0.305916	0.00359757
Rbl2	2066.66	-0.30911	0.00670047
Usp28	1013.74	-0.311111	0.0294444
Carm1	4057.02	-0.312053	0.0391043
Nbdy	1309.92	-0.319037	0.0213658
Wipf1	3029.78	-0.321542	0.00378474
Dgcr2	5162.08	-0.32281	0.038206
Pcnx	4490.43	-0.322877	0.0413685
Evc2	3217.8	-0.326181	0.00856186
Emp2	4062.73	-0.326343	0.00914315
Exo5	1308.51	-0.328381	0.0444368
Amer1	1350.76	-0.328415	0.00300134
Rcbtb2	2432.79	-0.331598	0.0420635
9530068E07Rik	9957.76	-0.334749	0.0423538
Poglut1	2986.88	-0.335361	0.0259736
Rsad1	456.032	-0.336744	0.0436081
St3gal2	8902.02	-0.337761	0.0172555
Mrpl9	1944.26	-0.338078	0.0137177
Vars2	1444.71	-0.340177	0.0394472
Tmem201	1116.38	-0.34041	0.0204598
Anp32a	2932.88	-0.3411	0.02936
Mettl2	1593.73	-0.345547	0.0204598
Cdk19	2233.95	-0.346755	0.00668768
Tmem206	879.215	-0.347116	0.0441507
Zc4h2	400.425	-0.348582	0.0310559
Kdelc1	1895.28	-0.349332	0.00940252
Zfp251	1144.45	-0.349337	0.00161326
Adipor2	3974.14	-0.352324	0.0204598
Tbcel	1611.7	-0.352719	0.00214797
Xpnpep3	989.099	-0.353325	0.00134019
Klhdc3	2766.4	-0.35467	0.041431
Zfp790	587.573	-0.356948	0.019667
Ick	1414.69	-0.356961	0.0294573
Sf3b3	10639.1	-0.357246	0.0488143
Gypc	1383.77	-0.358797	0.0375897
Capn15	724.641	-0.360281	0.0271971
Akt2	5161.19	-0.360959	0.0484691
Usb1	1737.63	-0.364436	0.0416101
Gtf3c4	3125.87	-0.365625	0.038206
Erbb2	2761.81	-0.369172	0.0289853
Mllt1	2904.39	-0.369527	0.0137177
Rpl31	2778.26	-0.371264	0.0375897
Zfp12	1260.57	-0.372209	0.0113051
Rpusd4	523.482	-0.376127	0.0147955
Med31	305.713	-0.379205	0.0461984
Gm29394	1296.62	-0.380348	0.0417285
Fbxl19	1033.98	-0.381009	0.0282529
Maz	5576	-0.383248	0.0229806
S1pr2	3510.87	-0.383372	0.0346808
Zfp30	422.12	-0.383584	0.0391043
Chtf8	5434.62	-0.383959	0.0318224
Diablo	1748.1	-0.389125	0.00484347
Txnl4b	388.331	-0.389228	0.0284484
Usp21	1961.57	-0.38934	0.00459952
Gid4	1936.27	-0.389526	0.00519409
Thumpd2	335.147	-0.39073	0.00810782
Spire2	545.564	-0.395109	0.048079
Klhl22	5015.79	-0.396069	0.0105372
Rara	1780.06	-0.397722	0.0368869
Selenon	4253.11	-0.399057	0.0271775
Fam53c	2241.69	-0.403046	0.000241992
Lrrc42	3350.57	-0.405436	0.0202688
Fam53a	1630.05	-0.408365	0.0123057
Pycr2	1798.03	-0.408924	0.0444817
Cebpg	2322.04	-0.409003	0.00148266
Rpia	1112.43	-0.411267	0.0210721
Zfp93	364.018	-0.412862	0.0195278
Cyp39a1	736.973	-0.413169	0.0240295
Arhgef2	10247.8	-0.413713	0.0414602
Parp12	537.14	-0.414865	0.0293212
Dtx3l	451.818	-0.416105	0.0190093
Klhl8	432.686	-0.418034	0.0300567
Ankrd6	596.138	-0.422825	0.0461984
Edc3	1285.87	-0.424027	0.0100673
Josd1	4707.63	-0.425316	0.00104868
Tap2	1573.67	-0.429321	0.0444368
Irf2	1439.05	-0.429345	0.0139672
AC149090.1	18121.4	-0.429898	0.00957977
Pdzd4	1139.55	-0.43138	0.0116117
Rnf135	468.787	-0.435853	0.0105372
Zfp316	1016.69	-0.436836	0.0428832
Lpcat1	1186.57	-0.436992	0.00472433
Speg	1856.73	-0.437592	0.03852
Tango6	700.581	-0.438909	0.0380157
Thop1	1815.91	-0.439139	0.0191785
Fam219b	604.146	-0.440074	0.036885
Oard1	738.806	-0.440658	0.00857316
2510002D24Rik	276.207	-0.440756	0.0405356
Vegfc	674.512	-0.443375	0.0159247
Tmem39b	450.782	-0.444041	0.0405323
Clip2	3685.49	-0.444645	0.0258631
Manbal	1400.1	-0.447129	0.0442031
Parp16	205.524	-0.448708	0.0387386
Zfp706	4663.74	-0.451021	0.00856186
Zfyve21	755.28	-0.451669	0.0257906
Nt5m	402.842	-0.457482	0.0322091
Ncs1	2519.87	-0.458538	0.0136779
4933427D14Rik	1047.15	-0.458813	0.0293756
Poli	459.542	-0.460118	0.00806365
Mta1	6436.5	-0.462019	0.0099054
Iqcc	667.078	-0.464899	0.0107283
Ccdc117	1297.36	-0.465851	0.00825423
Zfp874b	473.107	-0.469397	0.00259443
H2-M3	439.514	-0.470992	0.0423093
Osgep	1715.13	-0.472009	0.0224242
Ddx39b	10038.8	-0.478871	0.0122137
Rcc2	9407.02	-0.478927	0.00856186
Rxrb	2724.53	-0.480484	0.00461101
Serpinh1	36919.6	-0.481186	0.0414966
Ttc7	1120.01	-0.481786	0.0293212
Prdx4	3691.06	-0.48242	0.0322081
Zfp324	561.852	-0.483217	0.00134019
Dguok	1124.37	-0.483443	0.0119956
Nfya	2749.99	-0.483717	0.0051742
Ppic	4106.54	-0.484375	0.00365866
Mxi1	1578.38	-0.485687	0.0208283
Olfml3	3715.9	-0.486448	0.0436081
Exosc5	597.266	-0.489223	0.0376676
Prkca	3873.74	-0.490215	0.00339651
Pex26	694.538	-0.492908	0.00654716
Lclat1	2716.89	-0.493476	0.000224901
Efhd2	1565.3	-0.498113	0.0161476
C1qtnf6	2407.49	-0.498362	0.0191897
Dlg4	3652.12	-0.500893	0.0144721
Scfd2	558.813	-0.503338	0.013123
Bcl7c	1233.6	-0.503891	0.0142772
Sox12	1777.46	-0.505274	0.0274613
Hs6st1	2054.23	-0.50543	0.0268204
Maf1	2954.73	-0.506484	0.0310559
Adamtsl4	642.44	-0.508257	0.0375897
Ptprn	7409.74	-0.510968	0.000652186
Khnyn	1116.25	-0.511371	0.00580137
Galnt13	425.038	-0.51455	0.0430352
Noc4l	1562.45	-0.514759	0.014554
Zc3h10	826.633	-0.51781	0.012588
Med22	2582.35	-0.519419	0.00556604
Exog	327.807	-0.520816	0.0297344
Sema4c	1046.85	-0.5209	0.00806365
Tmem218	321.623	-0.52095	0.0335536
Sbsn	1060.83	-0.523962	0.0202771
Narf	1213.77	-0.528088	0.0409658
Slx1b	369.278	-0.528166	7.17318e-05
Ttc23	768.026	-0.528367	0.0473401
Rps13-ps2	21055.3	-0.529097	0.0487029
Rps15a	30497.8	-0.529941	0.0431095
Bcl7a	1302.55	-0.53266	0.000281995
Coq8b	489.072	-0.532699	0.0429403
Hmgn2	1321.39	-0.532778	0.0364605
Zscan22	382.308	-0.533365	0.00804936
Plxnd1	6200.52	-0.535744	0.0409658
Mmp19	2149.52	-0.536498	0.0161476
Micall2	1659.53	-0.537173	0.0441507
Gm11518	16388.7	-0.542904	0.0204598
Tdrkh	618.162	-0.553399	0.0146255
Loxl1	13086.6	-0.55513	0.0241987
Prdm15	720.488	-0.555473	0.0487275
Naip5	268.727	-0.556224	0.0149544
Zfp688	338.133	-0.5575	0.0394472
Cbx2	830.096	-0.558966	0.0361008
Alkbh6	589.549	-0.563694	0.0204598
Tubb2b	2259.35	-0.565166	0.0266105
Zfp647	141.505	-0.569	0.0431095
Atf5	11430.6	-0.569362	0.00244896
Itpk1	518.172	-0.570192	0.0294573
Zfp395	1588.05	-0.571782	0.0204598
Impdh2-ps	1489.03	-0.573665	0.00111678
Ormdl3	2615.74	-0.574851	0.0144508
Pcsk4	254.378	-0.57541	0.0246587
Mab21l1	801.04	-0.57848	0.0029965
Samd14	1239.57	-0.578909	0.00371112
Gm4737	8568.32	-0.580152	0.0239707
Rtkn	1336.45	-0.580451	0.0183513
Harbi1	406.958	-0.580963	0.00226793
Impdh2	6001.18	-0.58313	0.00349498
Cdk18	2832.68	-0.585819	0.0483094
Sh3bgrl3	2819.47	-0.588648	0.0355268
Adam19	3337.63	-0.590542	0.000954345
Pdcd4	2480.24	-0.594754	0.0234835
Ccng2	2087.35	-0.595353	0.036885
Gm10182	1077.28	-0.599191	0.000174916
Mepce	1758.84	-0.602045	0.00940252
Fam171a2	1340.63	-0.602328	0.0131707
Zfp174	256.804	-0.616208	0.0375897
Rgs3	1513.57	-0.617802	0.0455868
Zbtb5	524.871	-0.620603	0.000325143
Acot1	957.795	-0.620679	0.0388836
Agpat2	111.924	-0.621068	0.0453862
Cmss1	343.752	-0.622984	0.00395847
Tcf7l1	1795.45	-0.623991	0.038206
Jcad	4643.8	-0.625746	0.00150336
Zfp775	415.576	-0.629132	0.0183513
Nfkbie	307.681	-0.629615	0.0351615
Aplf	766.319	-0.630607	0.000179009
Hivep3	515.072	-0.63199	0.00856186
Lhx6	339.114	-0.63392	0.0387294
Igsf8	3977.1	-0.634984	0.0198575
Trim45	432.774	-0.641204	0.00077222
Ucp2	1083.73	-0.645778	0.0195278
Lxn	2852.12	-0.649155	0.0455868
Cd34	10535.6	-0.649416	0.00134482
Ociad2	337.173	-0.650811	0.0122137
Irx1	1133.86	-0.653216	0.0307996
Sh3bp2	1443.81	-0.6613	0.018059
Il13ra1	219.047	-0.663522	0.00159331
Lsp1	852.155	-0.66426	0.0168906
Efna3	212.006	-0.666968	0.0459684
Rgs20	444.922	-0.667195	0.00443797
Otub2	372.794	-0.675927	0.0116134
Timp1	3421.45	-0.679039	0.0245694
Pck2	4321.41	-0.68495	0.00580707
Fam131b	2012.65	-0.687455	0.000664508
Bgn	97843.4	-0.690848	0.0128521
Pla2g15	2388.72	-0.691602	0.000943103
Cnih2	222.974	-0.696065	0.038206
Dennd2a	5263.66	-0.698671	0.00150478
Il11ra1	3333.99	-0.702956	0.0179648
Trim46	801.36	-0.703996	0.00259443
Sipa1l2	3528.09	-0.70439	0.0066298
Proser3	387.041	-0.70811	0.0397913
Ralgds	5291.74	-0.708719	0.0202688
Zfat	598.196	-0.71974	0.0238553
Fbxo41	890.838	-0.721379	0.000693789
Slc29a1	1079.9	-0.723005	0.0282529
Smpd3	867.481	-0.723608	0.00856186
Emb	6148.23	-0.731411	0.00256534
Tnfaip6	646.621	-0.732978	0.0341684
Gli2	250.12	-0.744434	0.0310559
Zfas1	5923.01	-0.749057	0.0218523
Cdon	2024.02	-0.750877	0.0364605
Lysmd1	338.131	-0.756917	0.000700648
Il1r1	1964.7	-0.757231	0.00629597
Zfp128	209.847	-0.75777	0.000224901
Scyl2	2384.37	-0.758848	0.0464467
Tfap4	806.871	-0.761519	0.00259443
Tmem45a	630.865	-0.761694	0.0297344
Cln8	3141.23	-0.762272	0.0038887
Ccl7	1521.62	-0.764272	0.0422275
Mtss1l	4009.16	-0.766028	0.000551024
Socs1	288.222	-0.775356	0.00914315
Kctd21	352.021	-0.783103	0.00264884
Fam13c	1244.44	-0.785063	0.0164007
Sdc3	1488.66	-0.791098	0.00552447
Rhoj	1534.44	-0.791865	0.00077645
Ahdc1	1254.19	-0.793407	0.000551024
Pcdhb9	216.221	-0.796845	0.0162639
Irgm2	164.275	-0.799938	0.0204598
Col6a1	53797.5	-0.801422	0.0235474
Xaf1	354.236	-0.819628	0.0119956
2410006H16Rik	10631.4	-0.821098	0.0422275
Tfap2a	730.954	-0.821168	0.00803086
Pvt1	2024.37	-0.827795	9.13421e-07
Gas7	13591.8	-0.828005	0.00512668
H2-Q4	205.115	-0.828105	0.00332587
Lbh	5291.65	-0.832323	0.0387294
Ptk7	1571.76	-0.848385	0.000315466
Myo7a	1099.23	-0.851232	0.00139544
Snhg12	1711.85	-0.851851	0.00150478
Cacnb1	471.989	-0.854356	0.000230729
Adamts2	9146.82	-0.862229	0.00596386
Gbp2	472.494	-0.896821	0.00136311
Sulf2	1429.62	-0.906545	0.0161907
Begain	238.407	-0.907029	0.0181153
Lrp4	529.224	-0.907151	0.046348
Tlr2	500.017	-0.924907	0.00150478
Rbp1	2005.26	-0.925327	4.51785e-06
Parp14	278.369	-0.92539	0.00391875
Mex3a	2190.57	-0.927376	0.00213044
Adgrg1	72.7217	-0.930388	0.0444368
Igtp	114.245	-0.931856	0.0152295
Enox1	399.118	-0.945039	0.000611722
H2-T24	90.2818	-0.946925	0.0259736
Efna1	1322.87	-0.948647	0.0318224
Plpp7	57.8317	-0.962647	0.013123
A330074K22Rik	266.637	-0.965046	0.00700406
Rnase10	47.921	-0.967828	0.0442031
Adamts14	1745.13	-0.97313	0.0044436
Rdh12	38.3277	-0.981374	0.0310559
Il18	182.514	-1.00665	0.010117
P4ha3	952.269	-1.00723	0.00426337
Dlgap2	221.203	-1.01095	0.00268221
Cercam	171.237	-1.01186	0.00431743
Igsf10	1498.55	-1.01937	0.0123851
Ifi27l2a	63.9926	-1.02231	0.0377541
H2-DMb2	96.645	-1.02871	0.00288257
Gbp9	51.9619	-1.05152	0.0306431
Cd82	121.012	-1.06754	0.000800566
Zfp41	1083.24	-1.07052	0.0099054
Nat8f1	120.615	-1.0798	0.0387294
H2-Q7	211.758	-1.08698	0.00274498
Sardh	902.457	-1.08722	0.000372441
Csrp2	1603.4	-1.08856	0.00598362
Gdpd2	416.975	-1.08994	0.048079
Nuggc	50.0947	-1.10331	0.0409781
Boc	364.911	-1.107	0.00949765
Ltbp4	1251.34	-1.11157	1.88654e-05
Gm15280	482.243	-1.13213	4.3886e-06
Sh2d3c	108.549	-1.13985	0.00254922
Atp1a3	132.1	-1.15674	0.040275
Cd200	115.533	-1.18132	0.0310559
Col6a2	28456.3	-1.19749	0.00287418
Il17rd	972.802	-1.20061	0.00019115
Has2	320.768	-1.27308	0.0029965
Lrrc17	862.681	-1.2791	0.00681139
Glis1	258.357	-1.28073	0.0079847
Clec2d	2151.76	-1.29838	0.000130282
Cdsn	1502.66	-1.34703	1.1843e-06
Adam12	2470.94	-1.36084	9.28771e-05
Fcrlb	50.7617	-1.37018	0.0368869
Smoc1	319.048	-1.37192	0.0347557
NA	35.3884	-1.39959	0.0195278
Col5a3	679.716	-1.41823	0.000325143
Sfrp2	592.021	-1.42611	0.00360446
Nxph3	56.4183	-1.44809	0.00288257
Mapkapk3	612.122	-1.4753	1.96362e-08
H2-K2	70.2593	-1.47746	0.000450578
Fam135b	222.744	-1.49315	0.0466327
Mdfi	37.1243	-1.508	0.00355456
Prokr1	338.399	-1.51348	0.00011312
Timp4	80.5577	-1.51995	0.0479863
Itga11	1425.9	-1.54078	0.00114212
Trabd2b	1980.32	-1.54736	1.20503e-05
Scara5	982.055	-1.55125	0.048079
Plekha4	436.889	-1.5543	2.63878e-05
Gm7361	115.296	-1.57091	0.0141206
Rgcc	230.242	-1.5731	1.73252e-05
Ednra	698.558	-1.57357	2.6386e-05
Txnip	34226	-1.59858	0.0139534
Ccn5	3412.35	-1.6128	0.0453862
Oaz3	21.8364	-1.62677	0.0114119
Gria1	276.901	-1.62956	0.00108355
Nlrp1b	59.8544	-1.63724	5.58039e-06
Aspg	128.029	-1.66162	0.0215581
Depp1	214.697	-1.73923	0.00158626
Hr	118.77	-1.79032	0.0125592
Dlk1	29943.4	-1.82231	1.87449e-05
Scn7a	62.8004	-1.85057	0.0105372
Cacna1g	708.8	-1.88343	0.00022219
Trem2	96.7733	-1.91077	1.20978e-06
Serpina3n	668.285	-1.94256	3.01472e-06
Rgs4	1205.29	-1.95568	0.00807547
Asb4	41.093	-2.01559	0.0204598
Notch1	117.643	-2.05863	0.00022219
Scg2	1103.15	-2.0772	0.0227541
Gfra2	25.3859	-2.11137	0.00806365
Postn	49906.4	-2.11587	0.000800566
Lingo2	18.6362	-2.19384	0.0436081
Tmem176b	522.895	-2.22477	6.85979e-13
Tmprss6	29.4034	-2.25619	0.0162421
C3	1005.76	-2.26373	3.79797e-06
Rarres2	54.6501	-2.28895	0.00360446
Tmem176a	167.3	-2.40712	4.73693e-11
H19	1822.87	-2.53373	0.0229806
Islr	180.966	-2.54616	0.000130282
Nat8f3	96.8167	-2.56609	0.010117
Hhatl	22.279	-2.59133	0.0101664
Lhx8	17.1062	-3.67306	0.0132843
Mmp9	324.798	-3.99911	7.19065e-07
Gbp11	15.6837	-4.17477	0.0375897
Serpina3h	32.6238	-4.53222	9.13421e-07
AI606473	18.7839	-4.65783	0.000330261
Gpr26	12.4459	-4.88723	0.0161298
Serpina3g	65.5042	-5.06914	2.84357e-06
Card14	94.2188	-6.24087	0.00010033
Smarca5-ps	60.0376	-6.36728	0.0441782
Abcb1a	30.3683	-6.37397	0.00259443
Rpgrip1	375.288	-6.66537	0.0119956
Serpina3i	55.9035	-6.75648	3.25019e-06
Gm20796	51.422	-7.47086	0.00720497
Samd11	155.35	-8.32264	0.00287937
Gm7666	51.9416	-17.1546	0.000627074
