# Supplementary material for: TAZ-CAMTA1 and YAP-TFE3 alter the TAZ/YAP transcriptome by recruiting the ATAC histone acetyltransferase complex
Source: eLife journal article supplement (doi:10.7554/elife.62857), 2021-04-29
Supplement: supp [file elife_poa_e62857_Figure_3_source_data_2.xlsx]

## Sheet: DEgenes_SW872_YAP5SA_vs_EV
Gene	baseMean	log2 Fold Change	padj
AP003419.1	46.0143	19.9468	4.31737e-10
CXCR5	38.3826	19.8969	7.2054e-06
NPPB	2240.65	11.4925	6.32911e-85
AC089983.1	88.3109	10.6996	6.35486e-17
SLC27A2	45.4861	10.3903	5.59019e-14
SFTA1P	288.221	10.0092	8.45935e-28
SLC18A3	36.7508	9.63169	1.45055e-13
RGPD4	132.856	8.93964	0.0245782
MYO7B	109.193	8.67366	9.62778e-22
XIRP1	24.7075	8.59487	5.11193e-09
MARCO	27.6742	8.34338	1.08596e-10
PSG3	19.0141	8.26862	3.59502e-10
TNNI1	87.9705	8.15972	8.6774e-23
KRT34	47.2634	8.08264	9.88841e-13
IMPDH1P10	18.8587	8.04993	0.000146055
KRT81	3638.58	8.03171	3.52585e-234
INHBB	89.8295	8.01042	3.27595e-18
RFPL4AL1	48.5818	7.99823	7.1124e-10
CEACAMP10	596.362	7.97991	4.75911e-100
AC010323.1	29.9968	7.89736	0.0245996
LINC02331	15.1578	7.75949	2.15046e-08
CHRND	24.5877	7.73499	5.8692e-05
PRAMEF1	8.70867	7.70395	2.7227e-08
KRT80	1730.68	7.59266	1.9288e-267
LCN2	20.8996	7.53076	2.23689e-07
KISS1	240.391	7.52813	1.72645e-39
ANKRD1	2371.13	7.50811	9.12873e-69
CXCR4	15.3456	7.33991	3.95426e-07
AC115522.1	25.3423	7.2551	9.15921e-08
KRT4	36.4382	7.22312	3.93583e-17
PSG7	92.8379	7.21644	7.51319e-29
CAVIN2	121.51	7.17535	9.06174e-35
LINC01186	8.42811	7.08178	4.28558e-07
MC5R	25.2623	7.02423	2.1082e-07
PSG4	1067.99	6.99566	2.35249e-185
GGTLC2	5.28284	6.98365	2.58182e-06
LURAP1L-AS1	37.6579	6.96401	2.12587e-13
TINAGL1	244.133	6.96272	8.04375e-92
TNNT2	85.4604	6.91429	5.88518e-12
AP003498.1	6.75928	6.86288	7.9743e-05
C17orf102	57.6305	6.77843	4.24781e-19
WFDC21P	140.545	6.77758	1.5153e-59
LINC00592	5.24462	6.75846	5.33163e-06
THAP12P8	7.76332	6.74855	4.73338e-06
RFPL4A	89.1395	6.73677	3.22073e-18
AC114488.1	8.47851	6.67907	2.14047e-06
SPX	445.586	6.65141	2.02236e-66
HBG1	1243.16	6.64775	2.55756e-38
HCN4	60.957	6.57564	5.48241e-39
KRT17	109.933	6.52663	5.1461e-31
KRTAP1-5	5.60044	6.48774	2.71215e-05
AC245041.1	18.5183	6.45179	3.91105e-08
KRTAP3-1	7.79881	6.44768	9.72501e-06
PSG5	429.153	6.41804	4.91307e-92
AC026316.2	27.2299	6.40374	1.78493e-11
PSG2	45.1866	6.37494	2.48026e-11
NXPH2	6.69734	6.36128	8.21962e-06
C4BPB	51.0916	6.29616	4.05575e-31
ADCY8	7.41169	6.28752	1.62498e-05
AC062015.1	5.36892	6.26906	4.35105e-05
LNCOG	57.5927	6.26426	1.34907e-19
CPA4	8124.8	6.1694	0
GDF6	21.2965	6.16327	5.77898e-15
AC135977.1	22.0621	6.11082	0.00784123
FGF19	32.8471	6.09187	3.78744e-06
AP1M2	110.38	6.07559	1.08278e-26
CEACAMP8	13.7874	6.04625	9.94692e-06
AC100800.1	63.0212	5.99865	2.36469e-29
DIRC3-AS1	14.9469	5.98882	2.40605e-07
KCND3	287.414	5.97178	8.19703e-39
AL159166.1	10.362	5.94885	2.47192e-05
SUSD4	14.8044	5.92152	3.30279e-08
FGF21	23.9633	5.90013	1.07492e-05
TGM4	11.4518	5.89429	5.02415e-05
CHAT	14.3128	5.86857	7.56384e-06
PSG6	42.7532	5.83358	9.02218e-09
TRPM1	8.30346	5.81459	4.90671e-06
APCS	10.99	5.80562	9.67846e-05
NA	9.83408	5.78566	0.00301628
PDGFB	265.483	5.77765	4.32048e-60
MYL2	7.6746	5.77749	3.34852e-05
AL159987.1	10.2188	5.76976	7.79241e-08
RPL23AP47	7.77961	5.75798	0.00648283
AL365184.1	7.78844	5.70094	0.00013811
PSG11	67.8098	5.69911	1.53305e-22
PSG9	110.583	5.69027	8.60838e-29
KRTAP2-3	13.1497	5.65748	0.000150812
IGFN1	141.204	5.64456	6.76437e-27
AC067773.1	17.6478	5.58785	1.52613e-08
AL136452.1	5.43518	5.58779	0.000321495
OLR1	33.6578	5.58422	3.81034e-13
LY6K	276.185	5.53605	1.3974e-75
FPR3	132.369	5.52277	1.74663e-70
LINC01293	57.5633	5.52215	2.1833e-12
ADGRG4	32.7265	5.46392	6.74828e-07
TNFSF18	594.857	5.46219	1.86332e-20
AC087393.2	6.39591	5.44765	0.016712
CSTA	29.9604	5.41703	2.2435e-08
SPNS3	24.6211	5.38502	1.34878e-06
AL353743.4	7.12446	5.3818	0.000394147
MSLN	108.511	5.35527	1.87001e-51
KRT87P	36.5711	5.355	2.44992e-21
MYH2	23.1887	5.34287	0.000157826
OLFML1	58.5392	5.33261	5.52087e-28
PSG1	87.1469	5.29818	4.01563e-32
IL7R	8419.82	5.29187	2.78235e-69
OR10Y1P	5.65555	5.28547	0.00088105
ALCAM	37.5207	5.26779	5.97366e-15
MYHAS	12.2104	5.26434	6.30158e-05
STXBP6	354.282	5.25798	5.79688e-121
FOXB1	5.49741	5.19683	0.00134084
NGF	85.1259	5.15143	1.20994e-23
KRT86	789.172	5.14302	2.70737e-160
GPRIN2	25.9536	5.12276	6.28646e-14
CST6	11.6176	5.11668	1.05879e-08
CAPSL	15.1272	5.11059	2.60151e-07
LAD1	18.1241	5.09963	3.03392e-08
ZNF536	5.60413	5.07357	0.000804391
GPR1	155.127	5.04384	3.07053e-13
MYOD1	190.976	5.04285	3.58738e-14
GPA33	14.5215	5.0265	3.28917e-08
CLDN9	13.6013	5.01397	3.19781e-06
AC132068.1	5.38221	4.98791	0.0016132
PCDHGB8P	11.709	4.98393	0.0295623
NA	6.6663	4.97972	0.00958843
NPIPA2	22.558	4.94941	0.0175691
AL009178.2	8.64126	4.94675	9.97604e-05
CHRNA4	6.45375	4.92747	0.000142298
AC107871.1	14.4419	4.92514	0.000423034
PAPPA2	59.5562	4.92155	2.4164e-17
TMEM200C	23.7165	4.90735	5.05127e-08
ITIH3	47.9212	4.88663	5.36779e-15
PSG8	13.9843	4.87184	4.38639e-07
DRGX	5.39033	4.86334	0.00192864
LINC01291	43.4704	4.85692	6.35795e-11
LGALS9C	9.78064	4.84553	3.43223e-05
CD24	529.119	4.82052	3.00684e-127
TCEA1P3	6.55768	4.81824	0.000246095
LINC02535	49.6485	4.80506	1.92617e-20
AC114296.1	5.97291	4.79116	0.00168229
IL1RAPL1	13.931	4.78067	3.80385e-08
AC018781.1	5.2134	4.77423	0.00233523
KCNE1B	47.6024	4.77128	3.13096e-12
VSTM1	56.6076	4.7607	3.0557e-10
TMEM52B	10.5597	4.76064	2.96716e-05
AC005832.4	89.2836	4.7551	3.78756e-05
MFAP5	48.1055	4.75228	3.59906e-19
KLHDC7B	28.7075	4.7289	0.00195329
AC098613.1	9.12088	4.72691	1.3035e-06
STX11	126.227	4.71565	1.79227e-62
AL021153.1	5.18071	4.71066	0.000471099
C6orf132	13.1954	4.70423	2.68574e-08
CEACAMP7	24.5102	4.69916	5.59841e-13
MS4A4A	31.2221	4.69208	4.62189e-21
MT3	7.35606	4.65265	0.000612084
KRT8	14283.6	4.64212	0
ASS1	1006.36	4.61695	1.82286e-29
LINC01693	25.86	4.61397	3.04517e-15
CCND2	40.5571	4.60787	8.39951e-10
PLAC8	321.323	4.59893	2.70994e-69
KCNQ3	69.3694	4.59766	1.18024e-23
CDH4	706.331	4.58205	4.35467e-98
CCN2	8122.71	4.57217	6.20686e-123
CTNND2	5.41834	4.5566	0.000670408
VLDLR-AS1	123.311	4.54359	1.13919e-21
MEI4	8.54489	4.53957	6.51767e-05
LAMP3	296.148	4.53217	6.79959e-61
AC016717.2	5.2611	4.51377	0.00141584
TMEM132E	67.2506	4.51327	5.62429e-19
ITGB2	124.991	4.51218	1.0544e-43
AL137129.1	25.3578	4.50904	8.77386e-06
TMEM130	81.1848	4.48363	1.1567e-34
ANKRD2	7.83918	4.45296	7.82808e-05
AC092132.1	5.10503	4.44258	0.00181623
RIMS2	41.0736	4.4392	3.55318e-13
ANXA8L1	163.561	4.42707	4.39521e-39
AOX1	235.061	4.42267	6.2592e-34
MYH1	5.33571	4.41584	0.0304911
AC245041.2	17.4737	4.40701	3.6394e-10
CSDC2	8.6596	4.3878	9.15854e-06
NA	5.31882	4.38555	0.0493965
DNAJC6	116.134	4.37243	1.18373e-37
GUCY1A2	7.36927	4.36355	0.0068769
AC114550.1	11.4298	4.36145	4.26445e-06
LTF	52.0711	4.35827	1.15084e-21
HBBP1	30.014	4.35661	7.34225e-10
SYNPO2L	54.0993	4.34282	1.06188e-20
SNX18P24	5.71784	4.31447	0.0211067
FOXG1-AS1	5.64295	4.30903	0.000126172
RPL13AP20	27.5662	4.30412	4.29839e-11
AC090505.1	11.221	4.28646	1.91716e-08
NA	16.5134	4.2575	0.00674079
LCE2A	7.92885	4.2512	0.0109489
TNNC1	56.7059	4.24222	2.4038e-24
CLDN1	777.372	4.23354	2.13802e-49
HS3ST5	7.6383	4.2289	0.000126751
AL078612.2	11.2835	4.22128	9.76358e-07
SLC7A3	41.6683	4.21573	3.08777e-19
GSX2	19.0038	4.18174	5.64807e-09
2020-03-04	1178.18	4.17977	3.80676e-62
CCN1	10596.6	4.16342	2.08508e-303
TAGLN	4862.19	4.15483	3.48825e-74
AL451069.1	7.15026	4.13628	0.00175233
MEGF6	249.491	4.12918	3.88311e-29
MB	5.19096	4.1287	0.00391189
ADAM18	22.123	4.12184	3.7249e-12
EMX1	5.97986	4.11996	2.01435e-05
ALPP	37.813	4.11774	1.83686e-23
CD177	28.3491	4.10857	1.30441e-09
SLAMF7	176.448	4.10656	2.45885e-15
C7orf65	7.88488	4.10358	0.000154491
GFRA1	5.63952	4.09463	0.000247357
CPNE4	26.7578	4.0937	4.62959e-10
GJB3	26.3413	4.08523	2.97268e-12
AL590004.3	1289.95	4.08223	5.9649e-88
PRELP	480.6	4.06784	1.61256e-21
NYAP2	8.48815	4.06507	5.39693e-05
AC095350.1	25.6082	4.06086	1.96807e-10
NTNG1	9.82965	4.05324	0.00112176
TAGAP	49.231	4.04808	0.00757755
KRT7	53.4513	4.04629	1.87392e-17
HBG2	280.091	4.04006	1.40252e-38
MYOSLID	13.695	4.01075	5.19655e-06
PPP1R14C	7.44137	4.00887	0.00370078
LINC02154	47.1446	4.00664	9.03403e-23
TRIM29	531.289	4.00551	6.0641e-63
USP41	16.7344	4.00406	4.51378e-05
AC079054.1	7.79762	4.00265	0.000101185
MME	72.1838	3.99121	3.22862e-11
TMEM178B	177.537	3.98525	1.82286e-29
AC112656.1	16.7298	3.97477	4.26186e-06
XAGE2	41.3068	3.96842	7.03496e-26
PADI1	49.5811	3.96298	1.12897e-16
AL161431.1	253.719	3.95734	3.78951e-94
C5orf67	8.95705	3.94434	2.28759e-06
AC034206.1	5.47996	3.93241	0.000950257
ELFN2	490.724	3.93064	8.89636e-76
NA	6.03929	3.92798	0.000906737
LRRC19	16.4842	3.91769	3.12076e-05
NPY4R	21.7467	3.91582	3.61591e-10
COL12A1	7146.72	3.91449	2.64314e-196
AMOTL2	5194.21	3.90863	0
RASGRP4	13.3424	3.88433	3.36449e-07
LYPD5	426.146	3.88179	6.54644e-34
SERPINA3	18.9902	3.87613	0.00557394
AC018464.1	5.84079	3.8729	0.00371106
SERPINB7	182.295	3.87097	4.53815e-23
LINC01511	8.69732	3.86815	7.99678e-05
MOV10L1	49.2002	3.86732	4.91447e-20
AC022028.2	14.492	3.86433	1.59775e-06
LINC01638	242.897	3.83182	1.74526e-65
FRG2C	27.1678	3.82845	2.74227e-09
C7orf69	6.78884	3.80616	0.000262653
AC011510.1	10.8127	3.80391	6.14701e-06
HBD	5.80001	3.80058	0.000964284
HNRNPA1P33	8.0898	3.78875	0.000526339
ASB18	18.3513	3.78492	0.000837419
TMPRSS3	63.8542	3.76536	3.60123e-29
GPR65	19.0007	3.7647	1.87863e-06
AP002478.1	8.76448	3.76068	0.000735671
SHOC1	8.46987	3.74857	0.000417821
LIMS2	478.474	3.74133	6.06888e-98
GOLGA8IP	12.8711	3.73769	8.09565e-05
TNFSF4	327.521	3.73571	2.96668e-48
AC011591.1	33.094	3.72679	2.73751e-14
KLHDC7A	24.9132	3.71876	5.8597e-06
BICDL1	37.5426	3.71829	1.48078e-14
AL590644.1	26.0394	3.69277	7.07475e-13
AC015909.1	13.0144	3.69201	6.1915e-05
KCNU1	6.1493	3.68825	0.0377259
GPC4	272.305	3.67947	2.10067e-71
NA	13.8747	3.67429	1.58332e-07
FRG2B	5.36797	3.67303	0.0242254
TENM2	351.633	3.66148	1.48595e-14
GRIP1	17.4806	3.64784	1.40709e-10
CRLF2	21.3526	3.64501	1.33481e-06
HSPB3	33.7164	3.63384	5.5131e-12
AP003064.2	24.9414	3.62991	1.86087e-07
FRMPD2	7.45496	3.62862	0.0358669
RBP7	234.866	3.6028	3.91619e-101
MYL3	32.8079	3.6	8.02386e-18
LINC01133	24.0646	3.59396	2.85388e-07
SAA1	78.5324	3.57953	2.87773e-23
MYO5B	212.805	3.57778	9.34211e-33
LHX5	8.73944	3.57722	0.000428466
FAM201A	45.6417	3.56468	2.30532e-13
ARHGAP40	27.1446	3.56368	1.11255e-13
TM6SF1	340.581	3.54931	7.60647e-25
NPY4R2	11.662	3.54551	0.00201913
FKBP9P1	272.662	3.54471	3.55075e-32
SEMA3B	1213.28	3.54445	1.25094e-71
TMEM92-AS1	16.1106	3.51793	3.85336e-06
ITGB2-AS1	20.004	3.4924	4.87635e-09
AC005863.1	18.091	3.48661	1.56257e-06
AL049839.2	69.5747	3.48624	7.24106e-05
WDFY4	28.3648	3.48357	3.80901e-07
AC010247.2	13.4253	3.47497	1.73294e-06
FST	410.437	3.47444	7.97906e-38
CSF2RA	877.851	3.46591	5.59335e-82
GDAP1L1	48.3384	3.45702	1.69358e-11
RPL12P14	37.5438	3.45412	3.27951e-15
GDA	761.697	3.44655	1.84326e-72
SYTL5	146.997	3.44626	4.46653e-24
SLC12A3	6.88671	3.44515	0.00980116
LINC01198	6.3356	3.43655	0.00435954
AL645608.7	11.7846	3.43379	0.000293198
AC121757.1	28.9494	3.42854	5.40691e-11
ATP6V0A4	28.1278	3.42815	6.82368e-11
ILDR2	71.7615	3.4281	3.33477e-11
GAS2L2	7.13108	3.42525	0.0131066
WNT7A	74.4296	3.42296	1.51345e-16
INHBE	431.566	3.42197	3.09339e-08
NA	53.4927	3.40933	3.68859e-20
CHRNA1	65.2089	3.39948	0.000143838
ANXA3	816.372	3.39865	7.32173e-72
RPL29P19	46.3452	3.39783	9.06626e-18
AC009238.1	10.0332	3.38113	4.26188e-05
TSPAN2	207.195	3.37836	7.6083e-42
UNC13D	102.386	3.37262	4.17054e-24
LINC00707	90.4537	3.36952	3.77888e-27
TEX37	13.3423	3.36545	9.11743e-07
AC245100.3	41.7872	3.35263	7.99322e-09
PSG8-AS1	10.1372	3.3486	1.24264e-05
LINC02057	19.3481	3.3454	5.42696e-09
AC092384.2	8.42292	3.34296	0.000805557
TNFRSF12A	3033.22	3.33949	1.75332e-109
BMP4	3231.11	3.33687	5.484e-102
PRR20G	7.20683	3.3323	0.00286915
ALOXE3	48.2345	3.32429	3.18224e-06
ANKRD34C	8.91688	3.31166	0.000379098
PADI3	60.4905	3.30353	3.53619e-11
BRS3	15.9866	3.30338	5.01839e-07
IL32	397.832	3.29738	1.92385e-33
NANOS1	479.332	3.29141	6.62476e-93
AWAT2	6.56024	3.29103	0.00471812
THSD7B	5.90674	3.28922	0.00103245
HRH2	76.3752	3.27962	9.43433e-20
ELF3	19.1928	3.26805	3.17662e-10
HYDIN2	17.0482	3.26193	0.00305784
BDNF	222.34	3.25965	2.15237e-77
AC084783.1	9.84827	3.25893	6.84993e-05
AC005150.1	7.24929	3.24983	0.000249027
LUARIS	40.9259	3.24614	1.09165e-16
SMPD4P1	9.90262	3.24287	0.000238161
FAM3B	10.0799	3.24095	3.77964e-06
SBF2-AS1	216.803	3.23957	1.30444e-57
LINC02243	8.29723	3.23179	0.000287325
UCA1	6683.97	3.22663	4.08593e-54
INHBC	11.5384	3.22427	0.000146778
ZP1	57.8803	3.22233	2.31861e-08
SERPINB2	585.296	3.22057	1.46503e-25
LINC01605	45.7997	3.22005	6.21942e-12
TMEFF2	21.7217	3.21075	8.3698e-05
NEK11	62.0841	3.20806	3.47629e-14
AC105411.1	36.1041	3.20543	3.26827e-10
AXL	11912.6	3.19868	1.04278e-80
HDAC2-AS2	45.653	3.19804	5.15649e-16
ITGBL1	61.5858	3.1958	8.06939e-17
SNAPC1	2436.41	3.18757	6.35597e-57
AC010457.1	11.6086	3.18668	0.000215887
PIWIL2	12.986	3.18474	1.85814e-05
GALNT18	150.014	3.17981	6.02319e-42
PLCE1-AS1	11.3519	3.17953	0.019481
AC105105.1	257.262	3.17784	8.74462e-11
KRT18	26282.3	3.17539	3.95392e-171
AP004607.3	9.87438	3.17441	3.52277e-05
TGFB2-AS1	227.616	3.16919	5.43429e-59
PI3	17.9407	3.16806	1.06842e-06
EFEMP1	741.11	3.16582	7.62367e-62
CXCL14	171.486	3.15933	7.93397e-23
DUSP13	11.5273	3.15008	0.00322332
FPGT-TNNI3K	29.6309	3.14764	0.0108373
CAPN6	166.405	3.14468	1.19161e-42
CDH1	23.8792	3.13697	1.16631e-05
OSCAR	347.156	3.13295	3.41185e-33
TPO	119.135	3.13227	2.89089e-16
SUN3	13.0269	3.12271	0.000149119
CES5A	10.8198	3.12242	0.0125949
NXF2B	60.1593	3.12054	0.0293625
LINC00525	14.5927	3.12032	2.92005e-06
AC245100.6	52.1792	3.11104	8.96213e-09
VCX3A	15.5964	3.1077	2.98665e-06
CDC42EP3	1854.37	3.10521	1.03964e-44
VSTM2L	409.495	3.09682	8.24543e-66
FBLN5	552.294	3.09588	1.50079e-44
ACKR3	110.635	3.09357	6.09894e-43
NA	26.5706	3.08529	4.83013e-06
CA9	143.275	3.08462	0.000473941
AL590483.1	14.4173	3.083	1.43261e-07
AC018529.2	5.13035	3.08283	0.0323371
LOX	1600.91	3.06936	1.77358e-61
SLC16A12	9.18504	3.06924	8.23634e-05
TMEM178A	50.349	3.06642	5.23775e-17
FGF14	12.636	3.06566	0.000737313
AC103740.2	6.92252	3.06183	0.0316407
ALPK2	2595.84	3.05642	5.31429e-43
NA	43.8009	3.04726	2.74227e-09
AC010207.1	29.9864	3.04541	3.46133e-11
IL21R	123.001	3.03688	2.57915e-13
AC121758.1	17.5165	3.03587	0.0117537
PHF24	57.9882	3.03187	0.000102189
IGSF23	35.7386	3.03018	4.16767e-16
NLRP5	272.561	3.01849	3.54081e-46
CA3	9.54462	3.0174	0.00019536
PTH1R	160.129	3.01236	1.21335e-50
PLEKHA7	2443.23	3.01197	3.67504e-86
FBP1	21.3121	3.01107	3.00627e-06
AC004233.3	52.9481	3.01076	5.65079e-19
CNN1	297.693	3.00721	2.9237e-21
NCF2	11.7639	3.00086	0.000142781
MYL7	7.43416	3.00061	0.000375826
SIGLEC6	13.0246	2.99976	8.30217e-06
HRASLS2	6.31902	2.99716	0.00122801
KRT73-AS1	27.9072	2.98669	7.0597e-07
WWC1	602.145	2.98375	6.79706e-83
RBM24	126.653	2.98002	4.11356e-22
AJUBA	9629.72	2.98002	1.5173e-69
AC117500.3	30.0994	2.97672	1.10245e-07
HNF4A	25.9329	2.97609	0.00318248
DAW1	15.7397	2.97058	3.09308e-05
WNT7B	200.41	2.96716	1.77737e-16
BMP2	67.0867	2.96183	3.65833e-19
MYH15	58.5142	2.95533	1.52058e-05
CHMP4C	55.1236	2.95162	1.54707e-18
SLPI	49.8873	2.95027	1.13458e-17
GADD45B	977.097	2.94843	2.81085e-150
CLIC6	238.71	2.94704	2.58183e-68
MGAM	11.9121	2.94697	0.00401495
CPZ	462.722	2.9409	2.61082e-42
IL21-AS1	5.39451	2.94005	0.0207391
DUX4L45	69.4394	2.93826	1.74527e-22
USH1C	6.3382	2.92891	0.0243607
AC110048.1	5.15184	2.92566	0.00831761
FLNC-AS1	13.8951	2.92255	6.29466e-05
AL391422.1	7.10207	2.91928	0.0016724
ACOXL	37.1857	2.91808	9.76434e-14
FO681492.1	191.839	2.91232	5.87887e-28
LINC01968	5.10521	2.9108	0.0351058
ZNF185	2431.65	2.90515	3.22014e-164
RASGRF1	134.707	2.8937	2.92933e-22
EPS8L2	349.988	2.8818	1.24062e-42
SERPINE1	2089.77	2.87992	1.29909e-69
AC018816.1	5.31245	2.86813	0.0146767
GREM1	25.9871	2.85835	5.99889e-08
C1orf158	8.46955	2.8579	0.00821302
HSD17B2	349.729	2.85653	1.88056e-33
UPB1	37.1543	2.85535	2.46063e-09
RNF144B	69.8438	2.84949	3.23559e-16
IGFL2-AS1	125.577	2.84916	1.36532e-28
AL683807.1	11.7489	2.84715	0.000192635
TTR	6.64464	2.8451	0.00786931
ADAMTS16	718.058	2.84408	3.62414e-35
SLC9A4	21.2956	2.84306	8.97253e-05
AC009292.1	5.75294	2.83997	0.00296779
CHST4	31.9593	2.82733	1.21031e-06
SAA2	14.6963	2.82665	0.00495291
DPP6	11.996	2.82587	0.000732819
PROSER2-AS1	38.0848	2.8237	6.61905e-10
AC008429.1	55.5019	2.81895	1.5263e-11
BASP1	2291.35	2.81758	3.98929e-80
LINC00973	7.72761	2.8169	0.00467647
EDIL3	8.9724	2.81282	2.0652e-05
LINC01836	94.1276	2.81194	3.81101e-42
C2orf78	9.85946	2.81139	0.00403294
AC087667.1	30.9584	2.8104	1.37536e-10
DMKN	409.41	2.80722	6.69209e-79
ELMOD1	26.2617	2.80608	3.09213e-06
KRTAP5-AS1	7.91144	2.80222	0.0256472
UGT3A1	24.5467	2.80208	0.000922744
MIR503	28.3776	2.79986	1.4052e-06
ACTR3C	65.5209	2.79898	5.93036e-11
ROBO4	76.2827	2.78989	9.76154e-08
C6orf223	35.0525	2.78842	1.38079e-07
PSORS1C2	8.82427	2.78686	0.00030147
NKD2	30.1177	2.78419	1.1797e-07
LINC01203	6.58488	2.77557	0.000600612
TMEM45A	771.371	2.77348	1.17377e-49
FUNDC2P2	18.7489	2.75882	1.86087e-07
SLC4A9	9.43517	2.75562	0.000945325
GAS6-DT	47.949	2.75517	5.51467e-16
ALDH2	6.14512	2.75268	0.0174155
C9orf131	10.6952	2.75187	0.0199835
PIM1	1122.78	2.74793	5.91275e-44
FOSL1	1816.84	2.747	6.30909e-28
CDA	83.8268	2.74594	2.17201e-22
AC022167.1	33.0457	2.74543	0.0371723
SAMD7	13.891	2.73734	7.4863e-07
GRIN2B	12.8507	2.73719	1.84101e-05
TCL1B	142.168	2.73337	8.73017e-34
MMP23B	44.9577	2.73159	4.77338e-10
SLC45A2	191.819	2.73056	2.05637e-37
GSG1	11.7543	2.73048	7.96596e-05
NMRK2	40.2395	2.72253	0.00470427
AC097059.2	16.2489	2.71608	7.87954e-07
MMP24	326.471	2.70929	1.30924e-52
SERINC2	3346.32	2.70869	3.72571e-50
AC130304.1	149.987	2.70713	0.00936702
NTN1	74.0974	2.70004	2.24423e-14
ASNSP1	400.97	2.69608	1.35015e-16
COL4A3	9.19293	2.69178	0.0130424
CRYAB	8154.74	2.69139	2.39716e-30
MAGEB2	14.5196	2.69005	3.72138e-06
CEACAM22P	11.6586	2.68257	0.000461084
CCK	19.1042	2.68199	1.18718e-07
RUNDC3B	6.94683	2.6781	0.00681443
TGFB2	3830.69	2.67473	6.14447e-150
CYP2B7P	34.1976	2.66911	1.30516e-06
MYL4	57.4046	2.6667	3.88627e-14
NOG	208.133	2.66163	7.77738e-18
ASNS	14006.9	2.65706	2.32003e-28
KCNE1	13.6917	2.65429	1.03022e-05
AL023881.1	23.0707	2.65412	2.20156e-05
C19orf33	9.27119	2.65339	4.79448e-05
IGF2-AS	6.86792	2.65214	0.00106568
UNC5CL	15.0778	2.64991	3.66531e-05
THBS1	3896.64	2.64915	2.24748e-125
SPANXB1	1009.09	2.64233	6.45979e-96
AC020934.1	20.7445	2.64045	1.89827e-07
ADGRE4P	80.4851	2.63726	7.46793e-14
SLC7A10	92.3143	2.63689	3.78254e-35
OCLN	724.086	2.63622	9.49025e-34
AC117500.5	24.7226	2.63613	9.62296e-06
AC008514.1	9.82279	2.63427	0.0004282
STC2	5840.25	2.63385	6.22087e-19
JDP2	1542.86	2.63156	2.51733e-37
HHLA1	19.1567	2.63	1.47321e-07
HRASLS	31.7142	2.62139	1.05453e-08
KIAA1324	83.1375	2.61862	7.45322e-18
SLC12A8	358.03	2.61671	3.59616e-38
PLAC1	82.0856	2.602	1.62175e-24
AP001025.1	5.74386	2.60186	0.00869848
JPH2	828.929	2.60119	9.98635e-52
PSCA	27.2928	2.59994	1.31303e-07
EMP1	5374.26	2.59442	1.12543e-48
TXNRD1	33083.7	2.59361	2.98478e-47
AP001783.1	27.8508	2.59307	3.56963e-09
AC008897.3	8.56114	2.59121	0.00394557
C21orf59-TCP10L	27.0348	2.59014	0.0117522
NA	17.6658	2.58972	1.25383e-07
UBE2QL1	493.862	2.58605	1.48725e-51
HEPACAM	11.7885	2.58391	0.0213758
AL162727.1	20.9042	2.5826	1.5816e-07
GDF15	313.727	2.57841	4.88194e-06
FGFR2	5.64982	2.57618	0.0319543
ADM2	805.235	2.57539	5.60035e-11
MYCL	127.961	2.57304	7.53232e-22
LRRC15	26.2921	2.5592	0.000480633
CDH2	355.868	2.55788	2.80674e-37
AC022784.1	65.506	2.55467	1.74234e-16
AC017002.1	16.7628	2.5528	1.3808e-05
BX640514.2	77.9029	2.55202	2.78496e-12
IRX1	12.3297	2.55181	0.0014595
LAMC2	82.0101	2.55086	7.73479e-19
F3	631.683	2.54979	4.60033e-39
GNAT1	22.3412	2.54915	0.00850968
KCNK13	67.7706	2.54876	1.39304e-25
AC016705.2	94.4219	2.54812	2.38686e-13
HKDC1	536.458	2.54711	6.56599e-28
OLIG2	29.1682	2.54303	4.23237e-05
IGFBPL1	580.178	2.54289	8.04375e-92
LINC01615	22.1492	2.53801	1.83347e-06
FOLR1	159.009	2.53718	1.37783e-17
VN2R19P	6.4042	2.53417	0.0101896
AP000446.1	357.059	2.5341	2.46678e-55
NDRG1	8255.21	2.53277	4.76636e-38
LCMT1-AS2	33.1562	2.53266	6.79078e-08
MAP3K15	28.1466	2.53261	7.44034e-07
FAM166B	10.4288	2.5302	0.000779821
AC002401.4	17.6067	2.52464	7.97546e-06
MUC3A	74.0758	2.52249	2.06174e-07
AL157896.1	13.6485	2.50991	0.00997993
KLF17	5.56569	2.508	0.0358231
AC022239.1	18.6961	2.50755	1.84781e-06
AC044810.2	6.12959	2.5068	0.00502423
SFRP4	13.2202	2.50543	0.000202444
SMIM34B	6.9766	2.50461	0.0188325
PPL	285.507	2.50308	1.84514e-30
TMEM139	162.565	2.49831	6.49967e-48
GPRC5D-AS1	5.85003	2.49127	0.0161052
NA	5.30888	2.48455	0.0069752
ARC	110.273	2.48057	3.82116e-13
SLC7A5	18550.7	2.4779	1.96964e-14
NOC2LP1	35.0137	2.47666	5.74931e-09
AC009716.2	5.05675	2.46963	0.0234691
FMN2	287.733	2.46891	1.14557e-22
KCNH1	22.7283	2.46777	5.48408e-06
TUFT1	886.636	2.46482	3.43721e-97
SULF1	13.7387	2.46407	0.0177806
CEBPA	131.398	2.46315	6.60939e-28
PLAUR	813.972	2.46024	1.82895e-47
HES4	110.14	2.45883	8.24473e-19
SLCO1B3	13.2909	2.45843	0.00165072
CST7	33.3339	2.4574	1.86278e-08
LINC00689	9.95143	2.4552	0.00210089
ADAMTS9-AS2	15.9735	2.45397	0.000212237
DUSP1	581.984	2.45316	1.82714e-33
MMP3	9.60447	2.44807	0.0251666
AL590399.4	12.3109	2.44761	0.000233207
AL355916.1	143.212	2.44556	2.37935e-32
AC138150.2	38.5432	2.44391	5.60035e-11
AL136131.3	28.3149	2.44242	6.11973e-05
BPIFA2	22.6494	2.44129	2.65128e-07
CRIM1	9816.06	2.43898	7.78523e-106
LAYN	609.028	2.43693	8.28945e-53
AL844175.1	5.24305	2.43667	0.0228741
AC093616.1	454.26	2.4333	1.55823e-51
CSF2RB	37.9642	2.43198	1.5634e-07
FAM131B	590.295	2.42309	1.40893e-70
LINC01583	42.7513	2.41972	1.99144e-09
RPS6P12	74.8827	2.41882	5.91139e-22
AC073610.3	16.2154	2.41808	0.000560246
AC117422.1	6.67554	2.41371	0.00275387
HMGA1	9467.27	2.41355	1.59045e-77
TMEM155	10.5106	2.41154	0.00530501
KIRREL3	364.198	2.40975	9.49025e-34
MYRIP	5.79658	2.40869	0.0368227
FBN2	312.303	2.40654	1.30772e-14
TMEM184A	186.803	2.40475	2.29977e-16
RIMS4	97.0528	2.40118	1.27372e-15
CEACAMP11	8.4405	2.40062	0.0108251
AC090409.1	76.0238	2.39787	5.51278e-21
IGFL1P1	18.4143	2.39729	1.04717e-05
SERPINB8	817.262	2.39512	4.70043e-29
CYP2A6	5.28711	2.3926	0.0360348
ATF3	836.543	2.38907	1.41592e-18
CHAC1	753.122	2.38839	7.834e-08
SLAMF9	7.09593	2.38767	0.014602
WDR66	107.177	2.38594	5.72694e-13
AC004877.1	19.2244	2.38181	0.000109753
SLC7A11	1423.96	2.37903	8.78437e-06
ESRG	287.451	2.37723	9.04392e-33
LINC01764	8.55925	2.37561	0.00629729
AC090152.1	15.6025	2.37537	0.000145975
LIN28A	640.034	2.37433	7.25149e-70
INHBA	62.2871	2.36992	1.28372e-18
TNFRSF9	304.31	2.36976	1.0451e-19
TMEM225B	15.7991	2.36698	3.27365e-06
MIR503HG	2154.71	2.3669	5.85959e-26
LINC00857	12.3124	2.36495	0.00116891
ERBB3	99.3133	2.36274	1.75199e-14
CRYBG2	93.984	2.36207	6.60054e-08
ITIH5	73.0415	2.3551	1.32059e-09
LINC01436	88.9071	2.35352	3.05545e-26
TTC9	226.534	2.35303	1.50686e-34
Z99943.1	6.15488	2.35076	0.0139428
OR7E14P	8.15275	2.34637	0.00192862
ARNT2	978.215	2.34553	1.76795e-55
IL6	31.6535	2.34223	4.66318e-05
DLGAP1-AS2	423.872	2.33893	1.46235e-23
WNT5B	481.159	2.33857	2.37663e-35
AC122710.2	8.91119	2.3358	0.00573519
AC243972.1	13.6186	2.33311	0.000356728
IL20RB	107.38	2.3317	6.48419e-09
KCNQ1	14.7247	2.33153	0.00858527
CYFIP2	654.882	2.33077	3.37965e-22
NA	26.0402	2.32964	1.19667e-08
SPATA8	7.77624	2.32887	0.00648458
S100A2	104.41	2.32532	3.61841e-12
LINC02518	7.23336	2.32443	0.00850366
FOXE1	349.402	2.32086	1.18373e-37
EDN1	1541.88	2.31959	1.86067e-27
EXPH5	144.926	2.3193	4.46078e-20
DPP4	73.6292	2.31837	2.46501e-19
S100A3	298.382	2.3179	5.72083e-46
EHD4	2189.69	2.31294	1.5548e-113
CYTOR	2035.6	2.31117	1.47093e-109
WTIP	955.442	2.30848	5.49453e-35
RPSAP52	35.6156	2.30676	1.45707e-11
PICART1	40.0976	2.30653	1.25985e-10
TDRG1	14.3254	2.30361	0.000171214
HBEGF	861.644	2.30265	1.33811e-72
ANKFN1	98.2236	2.30028	1.4844e-16
C1orf198	2749.17	2.30001	8.94211e-194
AC126177.6	5.30939	2.29899	0.0415788
FSTL3	2216.42	2.29796	8.12719e-39
PLEKHS1	100.445	2.29769	8.84996e-17
DUX4L31	29.2581	2.2923	1.89827e-07
TNIP3	7.61168	2.28514	0.0180141
GPRC5A	3645.52	2.28444	3.58715e-60
BX322557.1	5.46812	2.28346	0.0288375
AC005670.2	15.0789	2.28191	0.00157068
CARD11	487.364	2.27919	1.64236e-28
DIO2	72.3743	2.27798	4.96199e-07
OGFRL1	1421.08	2.27779	2.08968e-41
PPP1R15A	3154.01	2.27466	1.17821e-28
HIF1A-AS1	59.9462	2.26846	4.2216e-13
TFPI2	2830.25	2.26606	3.63874e-70
AC006273.1	24.6712	2.26568	2.40581e-07
AC026250.1	102.798	2.26506	1.45604e-21
DHRS3	27.8973	2.25877	3.42915e-06
CLEC4M	17.5232	2.25668	7.87372e-05
NA	8.85467	2.25311	0.00237892
AC004817.3	15.8235	2.25226	0.000701063
TMEM56	329.454	2.24992	1.83515e-26
LINC00601	16.0377	2.24876	9.11478e-05
NOX1	21.8478	2.24833	0.000382242
BEX2	181.767	2.24783	1.3083e-09
FADS3	3833.39	2.24304	9.31669e-117
ERICH2	16.0875	2.24272	0.000991361
PTPRR	11.794	2.24151	0.00447868
FAM163B	39.1843	2.24081	1.5131e-06
ACTBL2	62.3757	2.23566	2.74984e-10
FABP3	256.539	2.23214	1.16789e-16
ECEL1P2	5.85131	2.23089	0.0289941
CX3CR1	5.95625	2.2303	0.0470524
AP003717.1	9.46488	2.23022	0.0288573
C7orf57	122.246	2.22743	4.0855e-13
FAM19A5	5.77879	2.22457	0.0353451
CALB1	16.6416	2.22236	0.00509525
NUAK1	3145.05	2.22183	8.46836e-89
UGCG	4030.04	2.22124	1.42856e-80
AL121890.4	11.6839	2.22094	0.000663934
SIK1B	50.9333	2.21603	5.55356e-07
AC011944.1	11.9147	2.21588	0.00754373
TTBK1	13.0262	2.21456	0.000297439
CAV1	23107.4	2.21174	4.5608e-73
NEGR1	205.265	2.21155	1.15713e-10
HBE1	415.275	2.21135	1.65771e-19
INSYN2B	326.646	2.21117	1.50175e-19
SMPD3	199.624	2.21113	1.88105e-10
AC073610.1	10.5828	2.21034	0.00610599
EEF1A2	5981.38	2.21013	1.26983e-77
ANXA1	9614.09	2.20887	9.61092e-27
NA	40.0837	2.20243	9.41659e-11
REN	21.6442	2.19636	0.00337787
NANOS3	11.0993	2.19266	0.000298905
ALS2CL	852.731	2.18909	1.60179e-36
PSAT1	16232.4	2.18838	3.47977e-25
TMEM40	73.2242	2.18762	2.31813e-10
OLAH	10.3869	2.18749	0.00296833
TRIM58	392.492	2.18705	1.36051e-54
OTUD7A	19.8287	2.18452	0.0247553
XAGE3	258.237	2.18325	2.72731e-52
AC092645.1	38.5495	2.17984	1.73172e-05
AC091806.1	113.723	2.17611	9.01973e-13
AC148476.1	31.4367	2.17448	7.02435e-08
AP001189.5	7.63295	2.17394	0.0461178
RBPJL	20.9217	2.17286	0.000834528
CES1P2	28.2343	2.17254	1.91577e-05
AP000894.2	11.2305	2.17191	0.00856624
MYOZ1	20.5039	2.17125	4.03422e-05
AL357033.1	14.6626	2.16982	3.01313e-05
CD55	1726.45	2.16965	8.05141e-113
CLDN3	137.103	2.16819	3.74954e-20
AC106760.1	323.398	2.16534	2.77646e-43
PNCK	57.1084	2.16391	7.95514e-06
GLI1	189.012	2.16291	8.97621e-11
FGF18	29.6381	2.16291	2.75368e-05
VTN	154.851	2.16118	2.30595e-12
FMOD	1627.64	2.15619	7.24193e-35
PVR	6076.55	2.15556	3.38762e-40
RPSAP71	7.43295	2.15513	0.0152986
AL035458.2	6.03124	2.1545	0.0268226
LRRC38	9.87339	2.15154	0.019481
ARFGEF3	55.4251	2.14477	3.5198e-08
SLC5A4	15.9236	2.14296	0.000155505
CTH	928.961	2.14012	2.30504e-12
AL021578.1	5.96519	2.13756	0.0443309
SUSD2	605.237	2.13755	1.30652e-34
RAB32	1770.46	2.13394	7.66938e-67
AL391422.4	577.933	2.13188	2.39512e-23
PRKAG2	1255.56	2.12948	3.13361e-57
SH3GL3	111.995	2.12873	2.12077e-13
LINC00882	70.5377	2.12793	1.24028e-13
AC060766.6	9.19009	2.12748	0.0025809
ZNF534	9.30829	2.12633	0.0103957
UPP1	3542.44	2.12536	2.08286e-26
RUBCNL	166	2.12427	6.80567e-12
MAP6	112.028	2.12325	1.09004e-13
NA	21.8401	2.12088	2.28637e-06
LINC00862	29.78	2.11822	5.60892e-05
SLC35F3	102.799	2.1158	7.26857e-18
COL8A1	2277.35	2.11434	3.24e-27
AC108463.2	15.8197	2.11369	0.000143394
AC116351.1	130.567	2.1133	5.1211e-16
AC009264.1	24.1779	2.11053	1.14935e-05
MYOZ2	10.3989	2.10915	0.00477643
KIF21B	1486.65	2.10824	1.19473e-26
AC114488.2	14.7239	2.10811	0.00127897
AC015987.1	29.6551	2.10555	3.7638e-06
CLGN	74.7607	2.10376	0.000310748
NA	32.9901	2.10274	8.36147e-08
LINC00958	7.13338	2.1007	0.0125865
LIPH	201.11	2.10013	2.44194e-25
AC025419.1	7.15903	2.09965	0.0299693
AL359510.2	5.03039	2.09916	0.047084
RBFOX3	23.025	2.09766	0.00314768
HOXC13-AS	178.564	2.09744	6.125e-20
ADARB1	2219.52	2.09547	3.68859e-20
SPTB	236.361	2.09402	2.67832e-14
SDC2	2063.5	2.09309	1.40893e-70
NA	1365.07	2.08593	7.76409e-63
SDR42E1	246.939	2.08593	9.954e-23
LINC00239	13.3766	2.08307	0.0145823
RPS6KA2	1707.93	2.07746	1.13017e-38
OXTR	109.044	2.07712	6.43505e-10
KCNIP1	288.877	2.07453	8.45567e-23
SH2D5	415.685	2.07115	1.96077e-58
MATN4	29.8506	2.07052	1.85379e-05
ERVV-2	60.76	2.07051	9.65908e-07
AC129492.2	18.5877	2.06861	1.72063e-05
PCK2	6290.65	2.06737	1.88818e-16
PRSS8	17.4747	2.06235	0.000772416
AC010255.1	15.3231	2.06131	0.00338549
MAEL	7.77469	2.05364	0.0245878
AL365181.3	171.315	2.05209	3.16559e-14
GABARAPL1	3444.55	2.04939	1.64848e-117
AL139352.1	15.4139	2.04896	0.000244426
RXFP3	26.7965	2.04878	0.000688016
AC005736.1	74.5968	2.04601	7.51025e-15
LINC00964	5.8926	2.04321	0.0429266
MAFF	607.032	2.0429	1.06826e-28
ENO2	1006.58	2.04161	5.0096e-21
INKA2-AS1	103.696	2.04035	5.42719e-09
AL590666.2	45.6317	2.03988	1.05814e-09
TMEM156	66.5852	2.03935	1.4319e-05
SPINT1	91.074	2.03919	1.15104e-11
LINC01018	72.3229	2.03409	6.77393e-17
MIR4435-2HG	2097.29	2.03218	2.77135e-93
FBLN7	185.287	2.02958	1.07111e-24
IL11	145.478	2.02871	3.20356e-16
CATSPER1	133.985	2.02731	4.75743e-20
TNFSF15	89.0339	2.02429	2.19836e-11
KIAA1211L	13.1475	2.02379	0.00383134
INHBA-AS1	14.9961	2.02276	0.00111884
AC078905.1	7.96788	2.0216	0.00883407
INMT	744.697	2.02104	2.9263e-58
DUXA	17.7869	2.02019	0.011762
HR	283.121	2.01921	2.97111e-09
CALB2	75.5926	2.01811	2.36035e-10
AP000892.3	436.227	2.01471	1.76571e-26
PDLIM1	4528.31	2.01356	6.92791e-72
MYPN	979.769	2.01277	2.19373e-27
NOTUM	82.3267	2.01275	4.041e-14
GOLT1A	20.8545	2.00848	5.26891e-05
UNC5A	9.61446	2.00834	0.0203946
LYPD1	36.7651	2.00536	2.80779e-07
LINC01121	12.1904	2.0048	0.0156222
PTCH1	1620.68	2.0031	1.34294e-34
S100A16	1005.65	2.00164	2.6964e-55
RBMS3-AS3	6.14442	1.99842	0.0233999
ARSI	573.046	1.99831	5.90491e-23
AC124276.1	10.9518	1.99786	0.0102892
LINC01151	6.75273	1.99749	0.0139862
AP003174.1	5.73595	1.99546	0.0269122
LOXL4	806.099	1.99526	1.90366e-55
SLC6A1	26.4573	1.99458	0.0085406
IRF8	69.1721	1.99436	5.2994e-08
CAV2	2124.49	1.9942	3.30653e-61
L1CAM	10255.4	1.99174	2.03158e-36
ANXA8	20.8444	1.99096	3.26392e-05
SLC3A2	10651.3	1.99062	6.19164e-17
FAM129A	2074.6	1.9895	7.39376e-15
APLN	612.381	1.98757	2.27901e-14
MAP1LC3C	6.63473	1.98744	0.0314467
CLSTN2	328.291	1.98198	2.85279e-16
CALCB	23.0098	1.98075	0.0159891
TRIB3	8474.98	1.98052	1.40474e-08
TOX	45.3474	1.98051	1.18618e-09
EPPK1	92.8434	1.97909	1.93094e-17
AC091182.2	17.0048	1.97605	0.000256025
FLJ45513	22.0443	1.97488	0.000169171
CCL26	75.1511	1.9746	3.88485e-10
PTGFR	15.2343	1.97298	0.000110761
AC005586.2	14.1341	1.97128	0.000171989
CLIC3	15.9698	1.97035	0.0040794
UBASH3B	966.822	1.96822	3.1355e-23
AL713998.1	83.7557	1.96653	1.14185e-06
HNF1B	9.01972	1.96601	0.0419361
NA	43.0297	1.9654	5.08868e-05
AC092162.3	14.4672	1.9645	0.000761904
FGFR3	194.259	1.96399	3.98572e-10
MMP19	140.861	1.96261	9.23924e-13
SIK1	154.214	1.96094	7.82534e-26
MPP4	50.0275	1.95691	1.05448e-05
PROSER2	428.443	1.95625	1.89893e-25
AC104024.2	12.7444	1.95601	0.00461376
TFCP2L1	94.356	1.9556	3.80661e-08
FOXO6	98.3004	1.95234	2.30152e-18
AC099518.6	18.7102	1.95152	0.000116675
NMNAT2	86.6377	1.95105	8.40063e-10
AC142381.3	18.7741	1.9508	0.0038668
AL355312.4	60.3721	1.94796	6.16654e-12
NA	18.724	1.94731	0.000569013
PXDNL	8.07964	1.94716	0.0264254
IGF2	2046.49	1.94673	2.63694e-26
CRIM1-DT	61.0346	1.94605	4.96621e-13
NA	225.558	1.94472	3.00298e-27
LINP1	60.8799	1.93951	3.29991e-12
DUSP8	315.648	1.93936	5.35826e-15
VWF	121.57	1.93898	1.7043e-09
AP001057.1	8.75176	1.93686	0.00494933
AC136628.1	42.0786	1.93681	5.19764e-05
SPANXA1	416.049	1.9354	3.09277e-21
NXN	1791.1	1.93486	1.04835e-59
ITGA3	22276.6	1.93198	1.10003e-80
PLEKHA6	883.887	1.93158	1.06921e-19
ACE2	59.3241	1.93021	7.75166e-08
BEST1	300.967	1.92669	9.50999e-15
PLAC9P1	16.6922	1.9215	0.000169574
ABL2	2982.84	1.9213	1.28856e-72
CREB5	770.273	1.92108	9.98372e-13
PKP2	1275.45	1.91942	4.11661e-73
LINC00869	134.113	1.91291	2.34434e-06
ARHGEF28	3310.08	1.91048	1.51621e-34
AC017002.3	10.7908	1.90944	0.0128439
TMEM71	20.6512	1.90933	0.00633048
SHOX	186.872	1.9072	2.08407e-22
GRIK5	70.4144	1.90638	0.000386709
TMEM92	202.848	1.9048	1.3858e-25
HSD11B1-AS1	25.9119	1.90462	9.01716e-05
GAD1	53.2255	1.90337	4.4198e-11
PEAR1	1120.15	1.90262	1.67897e-48
GDNF	9.64414	1.90167	0.0458807
CFAP58	18.5412	1.89901	0.000216843
FLNB	29152.8	1.89407	1.20322e-47
USP43	231.423	1.88904	8.07608e-28
ABCA13	16.3072	1.88401	0.0352667
LINC00900	27.3923	1.88336	0.00153406
AC124947.1	10.904	1.88067	0.0470702
VAV1	107.623	1.88028	7.58095e-12
AKR1C7P	9.92129	1.87661	0.0368888
HPSE	457.303	1.87362	1.57036e-50
KHDRBS3	71.8195	1.87304	2.15678e-13
SIGLEC14	107.307	1.86399	4.92269e-11
CES1P1	26.6288	1.8607	0.0275381
LINC01356	69.318	1.85998	6.4236e-10
ACAN	13.4916	1.85681	0.0341797
AC243964.3	235.824	1.85614	2.84282e-29
HRK	25.9512	1.85558	0.0135182
PKD1L2	885.888	1.85032	1.28153e-10
TMEM154	315.18	1.84761	3.04068e-09
SFN	28.7319	1.84742	1.01661e-05
SLC1A4	2242.25	1.84729	6.07864e-16
RAB11FIP1	3684.57	1.84727	2.03936e-85
CD1D	791.208	1.84723	8.96808e-38
ITPK1	2503.19	1.84565	1.75556e-61
BNC1	1562.45	1.84557	2.10396e-19
FOXE3	14.3916	1.84415	0.00305261
PEA15	12565.6	1.84342	3.68954e-45
ANO4	74.032	1.84166	2.50783e-10
PARP8	150.969	1.8409	2.78809e-14
ME3	73.9769	1.83927	4.63748e-08
RGS7	47.6613	1.83833	2.14871e-09
QRFPR	70.0696	1.83723	3.37924e-08
LRRC20	1074.13	1.8365	2.33447e-32
NRK	14.4579	1.83558	0.0020125
IL31RA	161.121	1.83508	9.91022e-12
IL18	12.8675	1.83501	0.00515229
PHGDH	8589.26	1.83425	6.71554e-35
LNCOC1	35.34	1.83298	6.57904e-05
KSR2	287.877	1.83167	2.19233e-14
OTOF	23.8113	1.83074	0.00409032
SLC52A3	59.3542	1.82954	1.62754e-07
PRKG1-AS1	7.92208	1.82787	0.0214318
SZT2-AS1	13.3174	1.82761	0.0191891
PRKCE	1501.61	1.82723	1.06072e-18
LPO	43.9406	1.82582	0.000601595
PDE1C	3542.72	1.82562	5.97625e-22
AC147067.1	13.411	1.82427	0.00167846
CGN	277.55	1.82381	7.0992e-16
AC005291.2	13.6435	1.82288	0.0458704
TSKS	10.5557	1.82275	0.013679
BCL2L1	5620.75	1.8186	3.79988e-108
GBX2	105.784	1.81529	2.25698e-15
XDH	47.8668	1.81432	3.2885e-05
AL035252.4	21.6147	1.81286	0.044641
AL390195.2	16.8046	1.8114	0.000913923
LINC00623	78.4135	1.81015	9.45228e-07
ATP1A2	143.773	1.80881	4.10637e-05
LINC00513	40.8228	1.80878	4.79253e-07
FLNC	24286.4	1.80781	2.26442e-46
TPM1	23789.7	1.80673	7.03184e-65
AL355103.1	9.81161	1.8061	0.0179642
AREG	9.79271	1.805	0.031026
IGFBP5	6426.85	1.80466	2.9855e-05
GPR17	17.2273	1.8028	0.00162592
PPP2R2C	56.8104	1.80275	0.000132522
P3H2	6277.97	1.79983	2.52164e-44
AC005481.1	58.8265	1.79935	4.79597e-11
FILIP1	45.8163	1.79749	2.56095e-10
FO393418.1	6.8788	1.79456	0.0432295
PSORS1C1	40.7172	1.79358	5.36608e-05
SCGB3A2	67.3265	1.79135	2.34901e-07
LINC01503	111.752	1.7909	6.29077e-22
MET	4328.73	1.78791	1.59293e-33
CHST3	1381.8	1.78719	1.25011e-66
VXN	179.482	1.7862	1.13877e-16
SEMA7A	526.885	1.78197	2.73235e-23
ADRB2	262.226	1.78182	3.09919e-34
SLC7A1	3757.96	1.77917	9.92332e-21
MAP3K20	5636.63	1.77742	7.34539e-35
NMU	16.595	1.77701	0.00246788
PPM1H	121.353	1.77619	2.6417e-08
TGM1	90.892	1.77535	6.26248e-10
MATN3	531.015	1.77289	8.00925e-35
NMNAT3	18.8127	1.77063	0.00146764
GAL3ST3	7.30062	1.77035	0.0493325
PXDC1	1898.91	1.76998	6.48961e-87
WWC2	2643.32	1.76893	5.89573e-24
IL24	21.3933	1.76845	0.0213477
AL121820.1	8.32275	1.76477	0.0385246
SHMT2	14299.5	1.76432	2.14427e-18
TCAF2P1	28.1711	1.76387	0.00134426
CACNA1I	43.8467	1.76346	3.46042e-06
SLC22A15	397.329	1.75992	1.53696e-07
AJAP1	312.825	1.75972	4.58178e-16
HMGA2-AS1	18.6096	1.75886	0.000863352
PTPRN	673.399	1.75839	3.08777e-19
ARL4D	533.065	1.75823	4.44543e-25
ZFP42	83.9506	1.75567	1.8837e-11
NA	310.897	1.75426	1.21557e-26
AC073130.2	9.8782	1.7524	0.0217255
AC080023.1	19.5669	1.75096	5.38117e-05
CDH7	14.0578	1.75026	0.0156549
RPLP0P2	306.694	1.74726	4.45698e-15
AC004917.1	9.77783	1.74634	0.0129571
AC012464.1	11.5772	1.74538	0.0186766
GGT5	898.82	1.7453	1.96498e-18
VLDLR	1352.48	1.74478	1.04678e-74
GCSAM	14.9224	1.74374	0.00487217
AL121772.1	44.2697	1.74021	1.52097e-06
GATA3	89.1028	1.74007	2.58213e-05
LINC00211	14.1691	1.73875	0.0010982
SPINT2	13.586	1.73742	0.0199786
AC009108.3	8.62464	1.73558	0.020795
APBA1	534.11	1.73482	2.92554e-22
PLS3-AS1	36.4511	1.73393	1.6997e-06
ERFE	143.521	1.73275	2.48454e-11
VEGFA	2322.71	1.73154	2.39514e-10
AC027117.1	17.3718	1.73063	0.000259334
ERICH5	54.533	1.72752	4.93375e-10
VWA5B2	10.9457	1.7262	0.00709686
CAMK2A	27.2806	1.72443	0.00181952
STPG4	10.2494	1.72412	0.0301263
IP6K3	192.455	1.72346	3.49265e-15
P3H2-AS1	15.1096	1.72276	0.00201831
SDC4	4176.42	1.72111	3.31891e-34
SH2D3C	192.603	1.71934	4.52357e-11
GPR78	42.2031	1.71793	2.79223e-07
CU639417.5	17.6875	1.71608	0.014739
CYTH3	8882.57	1.71497	2.69269e-114
KLC3	240.305	1.71466	8.59248e-21
AC005381.1	14.5691	1.71459	0.0177668
PDE6A	35.9032	1.71407	5.83948e-07
AC107956.1	22.9916	1.71372	0.000418847
NA	440.365	1.71296	1.67974e-26
BCL11A	26.1445	1.71236	0.00152492
NMT2	1496.88	1.7118	1.4526e-95
MYLK3	310.161	1.71153	2.2728e-24
GAS6	1171.45	1.71002	1.16789e-16
MAGEA4	9.33668	1.7086	0.027953
SH3BP4	4262.93	1.70477	2.85876e-65
PODXL	5988.65	1.70404	1.49171e-32
LINC01600	10.4632	1.70256	0.0226562
ANKRD33B	166.909	1.69995	1.49364e-17
AC114947.2	30.2987	1.69944	0.00280611
SOWAHB	9.76548	1.69841	0.0150048
MYH9	39701.7	1.69597	6.55241e-63
MTHFD2	8169.23	1.69499	1.41632e-17
GRIN1	70.8332	1.69456	6.26661e-09
DUBR	562.705	1.69439	4.30794e-30
RCAN1	3868.5	1.6916	3.11602e-38
CAVIN1	22717.4	1.68956	2.24052e-38
AC100803.2	22.4086	1.68822	0.00129376
AC092437.1	11.4938	1.68647	0.00621591
C4orf19	21.1647	1.68586	0.000596745
LINC01647	23.7419	1.68497	0.000536109
GRIK4	72.0864	1.68482	0.00314832
ZIC5	122.327	1.68213	3.48254e-13
AP002956.1	14354.4	1.68181	1.09556e-38
CITED4	281.977	1.68039	2.04011e-16
ADAP2	273.076	1.67924	1.47602e-18
JUN	2696.77	1.67789	8.72429e-18
LINC01405	15.0122	1.67364	0.00333209
ARID3B	403.876	1.67233	9.00747e-33
TMED10P2	29.8009	1.67187	1.25778e-05
TEX19	43.5551	1.67169	3.38234e-06
NFE2L3	4016.43	1.67097	2.86128e-52
APBB1IP	649.923	1.67081	3.72917e-29
WFDC3	25.0033	1.66957	0.000744736
AC099568.2	26.2569	1.66799	0.00216563
FENDRR	1374.19	1.66792	7.44843e-22
PSD2	18.5588	1.66792	0.00080551
OCA2	53.4287	1.66633	5.53203e-06
SLC13A5	229.875	1.66597	9.66621e-12
COX6B2	38.7777	1.6641	0.000265657
AC145124.1	226.683	1.66317	4.16528e-34
AC144831.1	11.1202	1.6625	0.0202833
AC020656.2	34.5194	1.66033	1.8206e-05
CDC42EP1	3906.3	1.66022	5.54933e-20
MATK	61.0128	1.65942	9.76953e-07
GLS2	26.6486	1.65933	0.00200651
HMX2	8.63397	1.6588	0.0290864
MIR646HG	21.7239	1.65858	0.00144072
KCNK6	269.045	1.65806	9.74613e-36
NEDD9	1801.1	1.65624	9.60315e-49
CSMD2	15.3385	1.65496	0.00508195
AL049650.1	34.4112	1.65438	0.000352204
OPN3	842.165	1.6539	5.43273e-46
PTPRF	14910	1.65286	1.03831e-43
METRNL	538.626	1.64933	6.19984e-27
HSPB2	71.6116	1.64921	0.00148842
BACE2	2559.99	1.6492	8.98345e-40
MIR3936	18.1509	1.64834	0.00019871
AP003469.4	15.3462	1.6483	0.00136831
GRIN3B	49.699	1.64801	2.95908e-08
MGLL	4291.09	1.64742	3.51998e-38
LMO7	2495.33	1.64691	2.91989e-20
AIF1L	1935.23	1.6465	2.03158e-36
HOXC12	131.337	1.64575	6.91082e-19
NME1-NME2	345.927	1.64461	1.25885e-12
RCSD1	77.4899	1.64418	7.8177e-06
NNMT	7823.23	1.64406	1.02886e-17
ACTN4	24964.7	1.64355	1.0227e-57
CLU	7930.29	1.64291	1.23547e-41
PNMA8B	17.9585	1.64214	0.0195891
NA	13.1429	1.64191	0.0385047
RTN4R	369.646	1.64138	2.40844e-21
TBC1D2	462.515	1.63922	1.29379e-26
TRPM3	33.529	1.63802	5.71951e-06
TSHZ3	74.6706	1.63602	3.48245e-07
PPP1R14A	175.082	1.63573	2.74028e-16
KIAA1210	25.7086	1.63503	0.000487108
NA	7.98045	1.63358	0.0320321
PLEK2	599.795	1.63095	1.37975e-28
EPHA2	5020.24	1.62983	5.31429e-43
AC108463.1	17.9547	1.62938	0.00103598
PDCD6IPP1	11.2217	1.62897	0.00431863
HYI	1853.67	1.6245	6.43362e-37
AC009055.2	28.2434	1.62422	0.00447769
EZR	9411.26	1.62358	5.49532e-83
TUBB6	6630.39	1.62274	5.12916e-24
SLC1A7	15.2149	1.62188	0.00208274
NPR3	210.582	1.61778	1.61002e-10
ESM1	570.393	1.61531	2.27066e-06
AC022034.3	9.57488	1.61512	0.032619
HAVCR2	347.799	1.61358	4.41026e-13
MPP7	42.7413	1.61309	1.96871e-05
DEPP1	122.398	1.61234	4.23285e-06
MAFK	1886.64	1.61158	2.44618e-48
CABP7	22.8784	1.61132	0.00325713
RPSAP41	17.3645	1.60924	0.0434405
MAP7D3	5669.03	1.60812	8.73771e-39
TCP10L	15.4854	1.60657	0.00375355
CFAP57	85.9938	1.60646	9.84476e-05
AC124067.2	159.435	1.6017	1.67552e-14
AC092490.1	224.832	1.59926	9.95603e-25
ANG	121.023	1.59817	3.25874e-11
DDIT3	1960.79	1.59388	0.000237704
SYT15	456.27	1.59289	4.71405e-27
SOWAHD	24.4747	1.58999	4.86306e-05
AC011453.1	8.51217	1.58669	0.022631
CEBPG	1838.69	1.58582	2.02627e-09
MTHFD1L	2628.19	1.58502	9.43129e-25
EBI3	130.714	1.57909	3.21723e-10
MEF2B	30.0594	1.57867	0.000487635
HES2	24.4761	1.57856	0.00313877
SSX4	18.605	1.57637	0.00440769
LINC02582	131.149	1.576	1.23932e-10
C22orf34	161.504	1.5744	1.70165e-17
AC139530.1	15.0549	1.57418	0.0204093
ADRB1	31.5158	1.5715	8.07839e-05
SAMD12	473.397	1.57038	1.47981e-10
BST1	122.71	1.56991	3.08888e-09
LINC01777	21.412	1.56939	0.000716175
AC092687.3	14.5632	1.56776	0.00327707
MYOF	15695.7	1.567	6.04168e-36
FLNA	161615	1.56661	2.03634e-71
AC106744.1	14.945	1.56456	0.0153753
LINC00662	641.629	1.56426	1.2593e-07
STAC	1317.9	1.56306	3.53554e-20
HEG1	10780.5	1.56138	1.49394e-99
MOCOS	902.934	1.55989	1.44375e-10
NFASC	750.118	1.55933	4.37211e-52
CD99P1	133.577	1.55917	1.29395e-13
LINC02469	25.0208	1.55817	0.00100103
NA	24.8512	1.55746	0.00131753
SAMD11	775.42	1.55393	0.000563968
CYP2J2	18.0338	1.55367	0.0190277
HCLS1	91.6823	1.54792	4.6908e-07
LAMA1	1777.37	1.54685	1.93824e-17
RAB3IP	248.084	1.54596	1.06907e-10
COL9A2	63.2301	1.54596	3.31029e-05
UCHL1	173.57	1.5429	4.24198e-10
GPR160	34.9944	1.53994	0.000116701
AC245595.1	457.825	1.53729	1.70018e-27
CFD	50.6398	1.5363	7.53517e-06
SHB	1465.47	1.53553	7.7294e-26
PLAU	3831.11	1.53492	4.16127e-23
MICAL2	7480.93	1.53283	3.87203e-31
ACSM5	100.295	1.53265	5.92968e-09
KLHL5	3640.73	1.53183	6.15872e-26
CES1	60.9109	1.5311	0.000433083
RNASE4	101.25	1.53058	2.11765e-05
LATS2	922.068	1.52978	1.93053e-42
LINC01301	23.1879	1.52809	0.000975513
MYLK	2007.99	1.52441	8.10317e-23
AC099066.2	26.0768	1.52353	0.0009197
GOLGA8S	17.9481	1.52236	0.00198539
TIMP3	33487.4	1.52035	2.51587e-26
ADM	794.991	1.51789	4.55263e-18
AL691426.1	14.7933	1.51708	0.00725771
PPP1R1C	18.8154	1.51499	0.00198928
C3orf52	168.17	1.51345	1.74698e-14
AC116021.1	33.8885	1.5116	0.000152481
PAQR5	477.013	1.50944	5.95936e-14
MSRB3	1780.2	1.50518	4.86881e-39
AJ011932.1	30.9981	1.50506	9.54899e-05
FAM189A2	29.5952	1.50452	0.00230246
POU2F2	515.417	1.50378	1.01373e-10
CACNG4	946.348	1.50325	4.88724e-16
LINC02381	568.293	1.50198	6.07655e-37
RGCC	105.66	1.50076	1.75109e-05
AL096865.1	40.0395	1.50011	1.13457e-05
SLC16A3	3928.1	1.4978	2.48312e-38
YAP1	7292.14	1.49656	1.75807e-73
AC226118.1	19.5282	1.49617	0.00461881
COL16A1	5086.36	1.49579	1.03161e-29
PLCB4	1544.33	1.49536	4.27178e-14
AP001363.2	10.816	1.49493	0.0257593
CCDC85C	2884.1	1.49178	7.03109e-33
DSP	1365.6	1.49061	1.12814e-36
AC069209.1	17.5623	1.48978	0.00781723
DENND2A	3519.22	1.48863	1.2766e-31
TENM3-AS1	240.74	1.48847	3.55397e-21
SUSD3	356.027	1.48539	2.04413e-17
LINC02454	19.9487	1.48513	0.00142834
BRSK2	130.153	1.48408	4.23227e-06
AC005336.2	28.788	1.48104	0.000695925
RIMKLA	73.2734	1.4803	0.000309965
SCN8A	851.231	1.47998	2.66257e-17
FAM83G	1496.74	1.47994	1.96269e-30
ARL4A	624.351	1.47957	4.8738e-25
MICB	1091.3	1.47758	7.86079e-15
FCMR	73.1085	1.47465	6.82709e-06
LINC01119	98.2556	1.47312	3.98158e-08
CYP2B6	16.1527	1.47263	0.0183593
SLC8A1-AS1	28.2122	1.47011	0.00558114
LINC01357	79.302	1.46979	8.92948e-10
RGS9	137.352	1.46722	9.55716e-08
GALNT9	229.188	1.4666	5.92998e-09
OXCT2	18.4682	1.46372	0.018952
MYRF	3061.45	1.4633	6.54626e-47
POLRMTP1	27.847	1.46327	0.000588905
CTIF	3415.14	1.46294	2.46587e-32
CCDC9B	1980.08	1.46168	1.03511e-22
AC116407.1	18.5477	1.45984	0.013861
LINC01219	18.9168	1.4579	0.00275377
VAT1	16525.2	1.45762	6.61876e-30
PRSS12	21.1762	1.45691	0.0142551
TDRKH-AS1	27.6724	1.45662	0.00887693
AL356515.1	15.8961	1.45624	0.0277752
AC104435.2	31.5696	1.45594	0.000189723
PROC	45.9168	1.45583	0.000130558
CRNN	18.6631	1.4549	0.00383134
ARHGEF16	104.708	1.45462	1.69019e-09
FOXC2	196.882	1.45147	2.71963e-10
AC105460.1	37.5001	1.45027	2.07241e-05
RIPOR2	1126.47	1.45019	2.89667e-12
EBF2	15.1697	1.44957	0.013214
S100A10	12016	1.44846	4.10141e-39
TBILA	15.8272	1.44688	0.00892148
NPTX2	1549.75	1.44647	3.93583e-17
AC129492.4	81.8909	1.44581	0.00177512
COL1A1	951.61	1.44511	3.51714e-09
DES	57.9881	1.44389	1.83587e-05
LLGL2	1015.84	1.44372	7.88067e-45
FAM131C	149.591	1.44234	2.12936e-10
MIR3936HG	98.1774	1.4422	3.44272e-11
TYRP1	289.056	1.44072	5.22953e-28
NSG1	71.4484	1.43888	0.000735098
AL603750.1	23.8585	1.43814	0.000904032
AXIN2	442.724	1.43391	1.05022e-13
AC093673.1	597.931	1.43242	2.4494e-30
DTX4	442.45	1.43226	6.94059e-12
SPOCD1	189.911	1.43216	4.41733e-05
SOHLH1	91.9295	1.43112	6.61905e-10
RDM1P5	32.0965	1.43107	0.00350757
MEGF11	58.0267	1.42969	0.000665151
ALMS1-IT1	18.7055	1.42835	0.0071401
MAP3K21	160.683	1.42756	3.55665e-10
CD9	3271.15	1.4275	2.01282e-20
ARL4C	1081.7	1.42629	9.91439e-25
SAMD4A	2581.58	1.42554	1.10763e-29
CEACAM19	174.75	1.42456	1.98614e-12
EIF4EBP1	6024.26	1.42375	4.07137e-19
AC007040.2	54.201	1.42339	2.50402e-05
ANXA2P2	38.6885	1.42329	0.00029214
BIK	12.2774	1.42266	0.0305929
CFLAR-AS1	19.0142	1.41954	0.00695533
MAL2	92.765	1.41771	0.000464643
LOXL2	22646.4	1.41667	1.62254e-23
LRRC61	24.3344	1.41628	0.00424278
PDCD1LG2	137.941	1.41465	1.12011e-07
GLRB	86.5623	1.41367	4.4171e-10
LINC01730	59.1221	1.41268	0.000162196
BARX1	13.6383	1.41184	0.0349195
SLC6A11	59.0749	1.41088	7.90333e-05
CACNA2D3	94.7036	1.40953	8.50353e-07
PRR5L	1135.68	1.40843	1.5257e-37
LMOD1	281.954	1.40804	7.75329e-08
ODF3L2	13.1907	1.40595	0.0382262
TLN2	3537.81	1.40566	5.69123e-17
DBNDD2	498.514	1.40555	9.40081e-22
COL4A4	16.5261	1.40542	0.0209539
SSR3	5937.32	1.40465	7.7485e-79
RUSC2	2608.47	1.40353	2.29956e-65
AL031728.1	20.1215	1.40199	0.00379689
LINC02487	24.112	1.40117	0.0228832
PTPRB	576.911	1.40048	6.58854e-15
MESP1	46.7446	1.39969	4.41982e-05
SMOC2	58.3939	1.39944	0.00405185
NPAS1	1188.24	1.39858	9.2913e-40
PIPOX	53.9548	1.39792	2.09003e-06
PM20D2	1660.57	1.39676	3.35988e-25
AC025580.2	19.2052	1.39449	0.0309983
CYS1	92.6595	1.39441	2.23401e-09
CELF2	578.24	1.39388	1.21016e-14
AL512785.2	18.6598	1.39379	0.0135981
NLRP12	80.4694	1.39291	0.000243564
MTMR10	1017.93	1.39245	8.14803e-38
NLRP3	205.315	1.39235	1.52722e-07
DNAH10	134.537	1.39095	0.000955108
WARS	18975.3	1.39006	1.77701e-12
AC073569.2	42.5942	1.38915	0.00345131
SORBS2	136.345	1.38896	7.46861e-06
TRNP1	1601.23	1.38837	2.39927e-22
KAZN	2090.46	1.38791	2.24808e-51
NR2F2-AS1	143.335	1.38777	1.53979e-10
AC010327.4	19.7505	1.38694	0.0492685
AC148477.4	20.9268	1.38691	0.0123516
CNN2	8063.88	1.38529	5.99e-55
GFI1	39.2407	1.38377	0.00406802
PAPPA	2557.84	1.38309	2.50565e-07
SMPDL3B	107.508	1.38288	4.66132e-07
AC092667.1	12.3452	1.38287	0.03882
LPAR1	468.041	1.38269	2.03683e-17
TPM1-AS	112.92	1.38187	0.000725931
WNT2B	151.259	1.38159	2.55962e-10
ATP6V1B1-AS1	56.9122	1.38036	4.27072e-05
GABRE	2505.18	1.37947	1.84234e-13
PPP1R32	33.17	1.37839	0.000528555
HABP4	1578.11	1.37748	1.70203e-65
BAIAP2L1	1835.62	1.37484	9.68293e-48
AC025857.2	32.6433	1.37349	0.00106775
DENND1C	82.5299	1.3734	2.4785e-07
TRIML2	231.955	1.37282	1.00525e-07
SARS	9946.6	1.37224	2.65614e-21
LINC02298	64.2872	1.37193	4.06838e-07
SLC8A1	552.676	1.37182	1.52508e-11
C1QTNF1	954.112	1.37155	5.37828e-21
CARS	10244.2	1.37113	4.01824e-54
CEACAM5	17.623	1.3678	0.00884101
UGT3A2	1561.3	1.36752	8.40021e-12
LINC01666	39.0663	1.36686	2.34483e-05
C1QTNF1-AS1	25.0661	1.36605	0.00303132
HS6ST1	1299.44	1.36534	1.18534e-16
GNB1L	130.784	1.36517	9.89082e-11
TCHH	60.1409	1.36475	0.000761904
GPC1	4941.09	1.36345	2.00995e-33
AL121721.1	38.8549	1.36255	1.14487e-05
PCSK9	829.742	1.36223	1.20626e-12
RPS6KL1	347.993	1.36213	4.24291e-14
ELOVL7	65.4793	1.36154	0.00256281
DRD1	26.4566	1.36107	0.00717294
HSPG2	6936.11	1.36103	4.0937e-21
TMEM151A	32.3752	1.35942	0.00547825
NUAK2	210.064	1.35749	6.40601e-17
AC124067.4	53.4532	1.35743	0.000109793
AL844908.1	27.5697	1.35738	0.000325277
LINC01094	30.0002	1.35663	0.000459572
MID1	1581.45	1.35576	8.50547e-32
NA	39.1227	1.35544	0.0020668
TREML2	26.0847	1.35538	0.00235713
TRIM7	166.752	1.35449	3.46207e-16
PVALB	24.0853	1.35247	0.023434
AC010247.1	21.5196	1.35167	0.0299222
CLCNKB	120.262	1.35015	9.10149e-09
LINC00632	86.5282	1.3483	1.23298e-06
COL13A1	1295.8	1.34813	8.41326e-20
GAL3ST1	22.2304	1.34804	0.0154647
RTKN2	192.522	1.34768	6.31441e-07
CALM2	26395.3	1.34577	2.52861e-49
AP001453.2	57.5525	1.34545	1.86192e-05
ZNF469	430.187	1.34512	9.15504e-12
AC011558.1	173.96	1.34492	3.22553e-07
FAM167A	682.861	1.34404	2.95701e-09
NA	175.016	1.34332	5.03271e-21
HCFC1R1	2331.03	1.34316	6.97626e-15
LAMB4	116.101	1.3416	2.27081e-07
AC239859.6	53.287	1.34129	3.83468e-07
WWC3	2266.24	1.33894	1.21523e-26
DKK1	937.757	1.33857	6.98968e-13
EYA2	133.823	1.33767	2.38298e-11
NIPAL4	209.045	1.33446	7.53863e-06
NR4A1	297.178	1.33325	7.24588e-18
FBXL16	218.731	1.3318	7.43801e-05
LINC00678	17.9623	1.33179	0.011765
CREB3L1	742.929	1.33166	4.26402e-20
COLGALT2	105.748	1.33163	5.18758e-09
SYNPO	2426.23	1.33097	5.06395e-31
STX3	2995.09	1.32997	2.26319e-49
OR2W3	22.5417	1.32902	0.0020795
PKP3	138.05	1.3288	4.40101e-05
PAGE1	358.445	1.32783	6.23477e-17
MELTF	431.33	1.32543	1.62271e-12
AL161729.1	72.3747	1.32528	7.87289e-08
INAFM2	266.014	1.32418	9.86962e-22
PARD3B	69.0579	1.32388	0.00280997
CEMIP2	4440.13	1.32333	1.32722e-36
SLC1A3	1565.1	1.32149	5.57651e-25
IZUMO1	20.4604	1.32013	0.0363744
AC099489.1	53.337	1.31994	0.00283651
ETHE1	1360.29	1.31853	1.91916e-36
LMCD1	1289.05	1.31846	3.01541e-08
WNT3	343.029	1.31801	2.2914e-18
FGFR4	381.567	1.31764	5.2041e-08
EPSTI1	1053.01	1.31639	2.19277e-28
FHL2	2309.55	1.31343	4.58645e-32
XK	72.49	1.31335	8.91922e-07
PFKP	5727.14	1.3124	9.16369e-37
AHNAK	122265	1.31232	7.23865e-55
PRSS50	13.044	1.3122	0.0351872
AC068987.4	22.1631	1.31169	0.00399674
CITED2	3299.68	1.31111	3.54245e-17
MPP5	2731.6	1.31071	1.67848e-19
GARS	17460.1	1.31052	2.78327e-14
ADRA2C	237.924	1.31041	5.10754e-14
BMP6	286.693	1.30926	4.55147e-07
CES4A	56.3291	1.30913	1.0385e-05
KRT18P41	21.5774	1.30899	0.00199411
CRISPLD2	701.9	1.30671	1.91137e-09
TRIP6	1891.93	1.30666	3.65497e-23
TCF15	164.473	1.30526	2.89384e-09
SV2B	97.5149	1.30306	0.0468091
PTPN6	55.8165	1.30291	0.000162004
SYTL2	1943.87	1.30265	4.76945e-11
AC011603.2	323.602	1.30188	0.0496765
LURAP1L	175.711	1.30137	8.64889e-06
AC010547.4	58.1647	1.29962	0.0166929
RNF165	34.7266	1.29905	0.0114189
CHRFAM7A	55.5674	1.29885	0.000274652
HSBP1L1	284.455	1.29845	2.24195e-14
LACTB	732.05	1.29802	1.48033e-23
DOK7	12.1868	1.2979	0.0371984
LINC01287	37.7704	1.29781	0.0183195
AC098487.1	25.414	1.29767	0.0116016
HLA-DQA1	47.1958	1.29669	0.00350864
GABRR2	34.62	1.29536	0.0209804
CCRL2	23.251	1.29446	0.0151246
GAS7	2811.77	1.29429	5.1471e-26
HMGA2	5164.38	1.29416	7.88296e-20
OR51B5	232.916	1.29377	1.82241e-18
NEURL1	376.257	1.29374	2.44118e-20
ARLNC1	37.4712	1.29317	0.00229019
SYDE2	235.87	1.2919	1.35922e-07
SCG5	39.158	1.29128	0.0041012
FLNB-AS1	98.0533	1.28911	4.77218e-08
CCDC80	5060.12	1.28715	2.16261e-29
KCNJ4	60.1092	1.2868	2.28983e-05
KCNG1	1345.74	1.285	2.15047e-08
AP000523.1	53.7649	1.28451	5.18373e-06
AC125807.2	800.769	1.28425	3.09414e-29
ADAMTS1	240.342	1.28169	9.68484e-06
CHURC1-FNTB	112.045	1.28158	0.00495803
NOXA1	57.9164	1.28131	0.000203002
CADM3	1193.86	1.2813	1.04734e-15
AL358473.1	37.4331	1.2803	0.000672051
SLC19A3	219.396	1.2792	1.66907e-19
CCM2L	68.8057	1.27881	0.000506086
PGRMC2	2270.37	1.2787	1.10604e-93
AC135178.5	14.782	1.27816	0.00882653
AC016687.3	39.0356	1.27808	0.00270464
AMOT	168.629	1.27413	2.60555e-05
RPSAP46	14.0747	1.27266	0.0399355
RAB3B	2500.74	1.2723	1.39047e-33
KRT8P33	61.6269	1.27198	2.35697e-06
CHST13	38.5541	1.27098	0.00056588
FSTL1	34023.9	1.27095	1.75058e-33
AC090617.9	15.7888	1.27027	0.0197709
MYADM	3260.6	1.26994	1.20473e-28
GDPD5	1564.67	1.26894	5.0741e-21
ZNF560	384.62	1.26602	1.95393e-15
KBTBD3	101.411	1.26599	0.000101291
MYL12B	10882.2	1.26543	2.54981e-95
ACKR1	26.7664	1.26331	0.00204333
MOXD1	100.299	1.26231	2.93703e-07
PTTG1IP	16185.7	1.26211	1.36224e-34
PAWR	1395.93	1.26193	5.307e-10
CASC18	23.6322	1.26135	0.0101914
AC083964.1	15.5095	1.26121	0.0384433
SYNGR3	539.803	1.26003	3.99892e-13
PIK3CD	607.321	1.25931	4.82116e-14
PDGFA	1396.48	1.25852	1.31614e-18
NA	21.7502	1.25734	0.00874603
TSEN15	2116.41	1.25562	5.96987e-21
AP002957.1	37.6114	1.2551	0.00175586
DPY19L2P5	27.4356	1.25439	0.00336602
EVA1C	367.599	1.25376	8.12294e-12
ADAMTSL5	346.984	1.25361	2.89667e-12
VSIG1	26.362	1.25263	0.0472402
RAB33A	27.1866	1.2518	0.0117601
CTPS1	4664.98	1.25035	4.90844e-30
MSMO1	2899.21	1.24966	1.4982e-07
TEAD4	1502.04	1.2487	2.43696e-35
RBPMS	1720.8	1.24744	3.25674e-36
IARS	24186.3	1.24572	2.96298e-21
LINC02575	49.3303	1.24331	0.000831284
CD274	323.624	1.24327	1.5056e-09
LIF	154.155	1.24321	3.5275e-05
AARS	23738.4	1.24259	1.92813e-14
SLC8B1	1452.1	1.24157	3.98436e-23
CPA2	11.4775	1.24036	0.0460859
VSIR	1076.14	1.23914	6.50067e-15
DIRC3	25.5128	1.23893	0.00930459
PCED1B	73.6897	1.23776	4.8186e-05
TMC5	49.8823	1.23709	0.0403131
SMIM10L2B	102.937	1.23563	4.21068e-05
GAGE12J	31.7578	1.23389	0.0377259
FALEC	20.5505	1.23302	0.0185533
GALNT15	66.943	1.23286	0.00290208
NRN1	401.803	1.23271	0.00892253
DLGAP1-AS5	26.9492	1.23152	0.0252439
CTNNAL1	7787.25	1.2312	8.07232e-19
SUGT1P1	47.6038	1.23112	0.000416468
MYO1C	10838.9	1.23074	1.00798e-26
SLC6A20	25.269	1.22893	0.0467362
JPH3	76.6724	1.22882	3.00122e-07
AL139020.1	290.592	1.22747	6.92236e-14
RN7SL1	545.852	1.22711	1.35153e-08
ACTN1	17677.7	1.22653	4.04961e-50
NEDD4L	4687.22	1.22652	1.89352e-36
AC097652.1	33.6881	1.22442	0.000556951
SLC12A4	2661.8	1.22436	1.40778e-17
BLK	325.341	1.22356	3.33033e-09
ACOT9	3014.29	1.21999	5.26218e-46
JPH1	95.1272	1.21963	2.18407e-06
SEMA3F	497.659	1.21943	3.82183e-20
SPANXC	1478.43	1.21846	1.63904e-09
PIM3	1569.13	1.21822	1.41193e-44
PRDX6	12970	1.21805	1.02804e-23
XBP1	4964.53	1.21802	2.39874e-35
GPT2	3740.35	1.21708	4.80517e-08
SERP2	73.9891	1.21665	2.43606e-06
KIF1A	33.0877	1.21578	0.0301987
CPNE7	438.107	1.21447	2.12587e-13
IL12A	40.2715	1.21376	0.000448702
ERCC2	3374.31	1.21307	1.05454e-26
C1orf116	44.6847	1.20938	0.000316547
EXT1	6550.5	1.20749	9.86248e-22
FAM155B	469.104	1.20668	7.50067e-24
PPARGC1A	48.4817	1.20658	0.0392398
MB21D2	492.152	1.20476	6.54337e-29
ERC2	65.388	1.20456	0.0338138
DDAH1	3716.23	1.20409	5.88462e-18
DHRS2	1627.92	1.2012	9.0618e-06
RRAS2	2136.44	1.20058	1.87231e-35
AL138478.1	119.427	1.20032	3.78895e-06
LINC01835	24.6209	1.1989	0.0177947
ITGB4	449.066	1.19681	8.14515e-09
TUBA1C	18892.8	1.19656	1.96076e-13
CCDC169-SOHLH2	38.9182	1.19652	0.0226886
DLX4	530.331	1.19589	4.80782e-23
C9orf3	1301.87	1.19565	1.71889e-33
TM4SF19	104.744	1.1956	0.000340783
RPS20P33	11.0153	1.19464	0.0491025
FEZ1	659.636	1.1942	1.14883e-15
AC073111.1	24.2284	1.19337	0.00830378
PHLDA3	421.181	1.19269	4.52123e-11
RHCE	20.1289	1.19141	0.0394271
RBMS2	4001.84	1.19077	9.29084e-45
AC138811.2	44.9437	1.19031	0.0176318
ADORA2B	805.83	1.1902	1.12893e-22
NUP210	2474.76	1.18955	3.11869e-26
DIAPH3	4667.7	1.18786	5.74649e-13
ADAM33	189.176	1.18772	1.05169e-12
EPB41L3	354.376	1.18744	9.85367e-10
SCN4A	135.576	1.1871	0.00150283
MBP	3639.44	1.18629	8.77254e-12
GRID1	67.5443	1.18393	1.91145e-05
MMP17	411.951	1.18289	8.09192e-09
PATJ	706.597	1.18088	8.93586e-10
SPANXD	336.217	1.18053	5.29646e-07
LMX1B	158.128	1.17952	5.42479e-07
YBX3	3730.36	1.17917	2.69374e-66
PLCE1	1326.09	1.1776	3.51519e-25
NBEAP3	75.2649	1.17635	1.53983e-06
SOCS3	897.818	1.17596	2.22813e-05
FIBCD1	129.113	1.17475	1.78514e-05
ARID3A	498.01	1.17334	2.85631e-12
SMAD6	1299.99	1.17263	1.01791e-14
CCND1	9113.41	1.17244	1.54513e-15
CRYM-AS1	32.0706	1.17072	0.0108278
HCRTR1	28.9783	1.17059	0.00542643
ZBED6CL	47.8575	1.17027	0.00238988
CACNA1B	179.537	1.17016	2.25415e-06
FOSL2	5985.01	1.16995	2.26759e-27
NXPH4	627.438	1.16946	4.38925e-13
RN7SL2	1281.45	1.16918	6.19814e-05
TCEAL2	28.4	1.16885	0.022365
MAMLD1	1047.31	1.16672	3.8096e-12
AP000759.1	69.8837	1.16671	3.91733e-05
ANKRD18A	120.652	1.16602	0.000364421
ATCAY	1432.95	1.16436	2.97401e-09
SLC1A5	12852	1.16393	1.03713e-12
UPK1A	68.1822	1.16255	0.00408743
SOWAHA	80.3769	1.16242	2.88643e-06
FAM43A	796.789	1.1615	2.91525e-24
ZMAT1	38.3723	1.1615	0.00841415
FOXF2	394.49	1.16057	2.01492e-23
EPDR1	1988.55	1.1591	5.47384e-23
SLC2A1	3250.84	1.15907	2.91292e-18
LYPD6	673.299	1.15548	1.08162e-12
FDFT1	15026.8	1.15337	2.97072e-12
F7	60.9953	1.15235	0.000286385
AC027682.6	85.4964	1.15173	8.72168e-05
AL132780.2	91.8079	1.15148	0.000135963
SHROOM3	3719.95	1.15131	3.16282e-29
THEG	27.7522	1.15029	0.0130341
EHD1	3523.99	1.14983	2.59331e-14
SLC46A3	306.615	1.14817	1.04493e-12
NT5M	308.331	1.14594	2.12795e-12
LARP1B	467.278	1.14506	2.70138e-10
LDLR	5914.41	1.14435	7.13077e-17
PLCD3	2293.89	1.14361	1.91916e-36
PPP1R13L	292.553	1.14322	2.26305e-10
IL6R	802.327	1.14315	1.25264e-12
FGGY	156.546	1.14282	2.32643e-05
AL117378.1	78.3349	1.14106	0.00020946
SCARF2	1756.21	1.14046	5.84937e-47
ANOS1	67.4139	1.14038	0.00010769
N4BP3	111.414	1.13938	1.97636e-06
ANKRD55	43.2406	1.13882	0.0021008
BLVRB	2573.36	1.13873	1.41913e-24
SPECC1L-ADORA2A	222.306	1.13842	0.000130638
CABLES1	2714.74	1.13717	4.25403e-14
FOXF1	786.625	1.13639	5.08553e-11
CHRM4	157.72	1.13606	6.44893e-07
C10orf55	41.4533	1.13569	0.00676251
CRY1	1344.1	1.13534	1.50817e-19
AL596223.1	39.3207	1.13506	0.0384953
GSDME	2169.26	1.13412	8.53202e-21
DENND3	1469.52	1.13355	1.75446e-30
ANXA2	106891	1.1335	2.5958e-44
UPK1A-AS1	54.354	1.13331	0.0206172
GOT1	2517.09	1.13161	7.94088e-13
DDIT4	5087.59	1.13058	0.000409586
AL132656.4	18.4629	1.13055	0.0358669
CEBPD	169.019	1.13049	3.82673e-07
CLIP4	1736.45	1.13046	2.17651e-08
FAM85B	19.2352	1.12981	0.0119029
SYNE3	2045.7	1.1298	1.72209e-22
BOK	3337.7	1.1295	1.15144e-13
AC092802.1	33.094	1.12944	0.0100841
SUPT3H	446.391	1.12909	1.77031e-22
RNF41	3274.28	1.12798	9.81324e-11
C16orf95	250.612	1.12781	8.57825e-10
F2RL1	1117.54	1.12746	1.68335e-17
HK2	2102.95	1.12668	1.3113e-15
BCAT1	1936.78	1.12629	4.42368e-09
GABRP	97.8887	1.12587	3.1225e-06
AL354718.1	27.675	1.12566	0.00575182
KCNF1	83.962	1.12519	0.00107928
MTSS1L	4140.21	1.12443	3.25915e-26
AL451042.2	26.7035	1.12356	0.00770402
AC027237.3	72.9436	1.12355	0.00431863
ZYX	10900.5	1.12303	2.74289e-20
SMC2-AS1	104.413	1.12298	0.000102606
FKBP9	12757.9	1.12231	4.37142e-40
ARHGAP23	5404.48	1.12224	5.86034e-37
ULBP1	1094.42	1.12157	1.85685e-08
ATF4	18601.2	1.12034	1.39654e-29
UAP1	2438.45	1.11971	3.42748e-20
AC006252.1	66.2063	1.11891	0.000796987
NA	39.8803	1.1189	0.00173541
ARHGEF18	3169.61	1.11873	1.50599e-26
C4orf54	44.1001	1.11777	0.00112049
ALDH1L2	216.157	1.11747	4.91504e-05
AC125611.3	1591.78	1.11717	6.41664e-11
SYDE1	3531.24	1.11461	7.12441e-20
PCID2	2143.24	1.11433	3.65694e-46
COMT	3313.74	1.11423	8.02663e-21
AC135506.1	22.3711	1.11386	0.0115452
AL160191.1	17.7975	1.11253	0.0472602
LONP1	5588.88	1.11219	7.18353e-29
EFR3B	66.2786	1.11183	0.0009197
PITPNM3	292.593	1.10926	7.83014e-15
ARSG	201.147	1.10781	5.19056e-10
NXNL2	101.711	1.10672	8.28883e-08
CALHM6	28.5683	1.10644	0.0180201
IGF2BP2	5316.7	1.10552	8.05081e-41
KCNS1	313.868	1.10541	2.34936e-08
SPANXA2-OT1	50.2078	1.1036	0.00566618
TTC7A	1548.82	1.09971	2.22768e-29
C1QTNF2	299.247	1.09916	0.000115303
KIFC3	5432.51	1.0982	2.94707e-28
FPR1	28.6061	1.09793	0.00654297
NFIL3	1500.97	1.09727	2.47249e-08
AC084759.3	23.8126	1.09645	0.0309357
CARD10	1474.57	1.09579	3.78776e-12
FAM167B	176.226	1.09579	5.62855e-06
PRAG1	3099.32	1.09553	1.10207e-12
IL1B	73.1764	1.09523	0.0154903
FOXA2	107.311	1.09461	5.20431e-05
CAP2	1928.4	1.09309	1.39412e-28
SMCO4	160.016	1.09125	0.00043619
AC244669.1	91.295	1.09103	1.4277e-06
NABP1	2078.39	1.09017	3.26421e-09
FZD2	1127.5	1.08937	1.0529e-16
PYGB	11837.4	1.08908	7.60333e-41
ERN1	835.878	1.08896	0.000227888
CXADR	430.958	1.08868	1.42817e-08
NOCT	193.321	1.08856	9.03917e-09
TMEM158	357.809	1.0884	1.23501e-07
TEX41	51.4991	1.08803	0.0012046
NA	98.2864	1.08668	0.000267708
CEBPB	1453.56	1.08597	1.17345e-05
AC073365.1	60.7179	1.08468	1.3062e-05
PTAFR	29.5007	1.08456	0.00964631
CYP24A1	230.735	1.08426	1.23947e-06
ZSWIM4	566.84	1.08145	3.17633e-18
MARS	14346.5	1.08074	6.14418e-51
RHOBTB3	58008.2	1.07945	2.11304e-15
OTUD1	108.539	1.07926	2.51855e-06
SERTAD2	1650.9	1.07921	5.93948e-24
LSP1P4	1758.04	1.07886	6.28944e-33
CHRD	56.1711	1.07743	0.00934192
NA	23.5932	1.07712	0.0466336
ADAP1	466.521	1.07697	2.35155e-15
MAL	65.6243	1.07634	0.00111884
MYL12A	9438.49	1.07512	2.04872e-37
KLK1	68.0157	1.07475	1.84415e-05
TMTC2	236.965	1.07468	8.88077e-11
WNT9A	123.586	1.07403	9.27916e-06
AC008957.3	81.6423	1.07281	6.43553e-05
WNT5A	1223.95	1.07119	1.99215e-13
PNMA2	3733.39	1.06998	1.64176e-19
SPAAR	28.0798	1.06921	0.00815079
AC073585.1	61.6612	1.06898	0.000549
CGNL1	895.542	1.06879	3.37704e-13
HSPB8	1436.39	1.06856	4.62771e-17
PIK3R6	45.7568	1.06717	0.00155725
NFKB2	732.716	1.06662	5.05687e-11
RTBDN	28.103	1.06475	0.0123674
DICER1-AS1	124.688	1.06339	5.31919e-09
KLF2	119.591	1.06278	1.2347e-05
ANGPT4	46.2043	1.06089	0.0016423
YARS	12806	1.06083	1.70625e-15
CTSB	51746.6	1.06012	2.2999e-16
IGFBP4	22445.3	1.05783	2.48604e-16
ITPR3	5904.79	1.05768	3.00676e-28
AC005307.1	131.452	1.05706	0.00589248
SELP	136.364	1.05693	0.00348135
TAX1BP3	4806.33	1.0566	7.03081e-18
C12orf75	2759.52	1.05636	7.55025e-29
LNP1	176.877	1.05579	8.54497e-11
AL355601.1	25.6136	1.05488	0.0202833
ITGA7	128.212	1.05455	0.00185394
ADAMTSL4	843.036	1.05453	3.3761e-13
S100A11	9916.27	1.05335	5.38548e-27
CLCN4	1217.16	1.05213	4.27434e-10
ADRA1B	405.851	1.05197	0.00262382
PHLDB1	8195.74	1.05156	3.37495e-22
ZNF850	295.953	1.05126	0.000348894
SDK1	1217.64	1.05097	1.20872e-14
NUPR1	3841.86	1.05043	0.00414698
INPP4B	1588.24	1.04984	5.29665e-15
PCLO	431.353	1.04887	9.03095e-05
FTSJ1	3401.26	1.04793	8.68244e-43
GAS5	7842.95	1.04766	3.0233e-11
FAM129B	17789.8	1.04762	1.53522e-27
AL162231.2	108.83	1.04742	3.96154e-06
GYG2	1137.48	1.04657	1.63636e-15
KCNK9	51.845	1.0458	0.00243857
CLTB	1764.88	1.04529	3.08126e-27
PRICKLE1	152.584	1.04518	2.70713e-05
TJP2	4658.74	1.04498	2.33131e-28
AC020916.1	458.587	1.04456	3.29408e-15
CD44	26250	1.04307	7.91847e-20
SSR4P1	122.133	1.04227	1.76489e-06
AL356056.2	88.0087	1.0412	3.02105e-07
UBE2S	5368.62	1.04085	1.16803e-19
PLCG2	1243.88	1.04049	2.03615e-11
IL2RG	101.376	1.04038	0.000500678
FOXL1	378.207	1.03877	2.33004e-12
AL662907.1	56.1475	1.03816	0.000103645
AC005224.4	114.231	1.03805	5.25794e-06
LINC01547	217.718	1.03797	1.26188e-09
RASSF7	937.372	1.03594	3.04812e-08
TP53I11	1725.49	1.03411	6.50547e-21
BCAM	3742.93	1.03408	7.55745e-16
SLC31A1	4679	1.03381	4.02253e-38
LZTS3	1797.58	1.03225	2.60094e-37
ICAM5	825.11	1.03122	1.61019e-09
MYO1E	3124.76	1.02909	2.46501e-19
KCMF1	2322.44	1.02894	1.91552e-14
AC092338.1	1800.68	1.02812	2.79141e-22
AKR1E2	18.9429	1.0275	0.0456094
ABCA4	54.7431	1.02635	0.0248189
CKS1B	3700.24	1.02393	3.89311e-27
FRMD5	262.635	1.02353	5.83668e-09
PRSS53	192.009	1.02352	0.0218398
MRPL23-AS1	189.688	1.02226	5.08655e-10
DOCK2	1547.34	1.02222	5.64993e-11
RRAD	54.8246	1.02202	0.00789345
RASD2	211.464	1.02122	6.84477e-12
QSOX1	8378.69	1.02117	4.76834e-23
KLF5	608.406	1.02113	4.17215e-05
SESN2	1594.17	1.02084	0.000410596
ALDOC	1821.66	1.02076	0.0453512
ASPA	207.172	1.02025	9.11445e-11
ACSBG1	82.4158	1.01906	0.00741509
HDAC9	214.499	1.01834	2.11491e-06
PTGIS	1269.19	1.01793	4.21384e-16
SPTAN1	27548.3	1.01774	1.12633e-46
SH3D21	340.839	1.01737	3.20354e-05
MYLK-AS1	37.7056	1.01724	0.0124048
FOXN3-AS1	91.6297	1.0167	4.21068e-05
TLN1	34235.6	1.0155	2.71845e-21
CA5B	553.481	1.01361	2.49512e-11
SERTAD4-AS1	147.69	1.0108	1.10313e-07
CD200	73.551	1.00962	0.0117004
CERNA1	67.9505	1.00928	0.000248538
DUSP14	1404.73	1.00855	9.34211e-33
SMS	6603.49	1.00845	2.24057e-20
MRAS	1665.82	1.00842	3.46098e-20
HAX1	4016.22	1.00671	7.35083e-19
GCK	86.1572	1.00628	0.00023562
F11R	1874.63	1.0062	9.57018e-10
AC005336.3	43.4025	1.00503	0.0154157
BX322562.1	38.9615	1.00452	0.00540832
ASAP1	7407.4	1.00446	1.98983e-23
DUOXA1	48.4129	1.00399	0.0177411
KIF6	184.979	1.00364	0.0027035
IL17D	149.042	1.00328	3.27526e-05
MYO1D	1277.3	1.0027	1.70953e-22
LINC02615	53.0467	1.00208	0.020559
AL365181.2	32.2909	1.00166	0.015461
PYCR1	8366.04	1.00133	4.5683e-17
IFITM2	1317.63	1.0004	3.62704e-06
TCAF2	445.377	0.999998	0.000643568
GIT1	3699.95	0.999548	2.17267e-35
C2orf27A	102.382	0.99916	4.7131e-06
AC006262.1	30.2804	0.998705	0.0127433
AP003119.2	21.0592	0.997779	0.0242115
NFKBIE	433.063	0.996842	2.10348e-07
LIN54	911.508	0.994827	5.55242e-09
SRPX2	1641.57	0.994514	3.30731e-08
ZFAS1	5020.05	0.99343	1.23747e-08
CRYBA2	26.6879	0.99283	0.0209558
AVPI1	366.804	0.99126	3.20013e-10
GNL3LP1	96.3087	0.991214	2.91749e-05
ADAMTS12	10377	0.990664	1.61295e-22
NTMT1	2667.51	0.990649	4.95271e-27
GUCA1B	26.5596	0.989533	0.010338
RHPN2	791.741	0.988498	4.43758e-17
SPTBN5	182.573	0.988476	0.000188418
SIGLEC5	138.352	0.988329	6.13046e-07
CCNB1IP1	4135.16	0.98812	8.6985e-20
SH3TC1	1122.41	0.987997	2.4446e-05
TRABD2A	897.35	0.98795	2.10298e-20
AL139289.2	61.6503	0.987057	0.00151988
KLHL29	1265.21	0.984978	1.28128e-10
CSRNP1	686.128	0.983894	1.03485e-19
PARVA	12811.8	0.98363	3.10445e-84
KTN1-AS1	455.572	0.983611	3.36541e-09
NUP50-DT	172.524	0.983398	2.10477e-05
USP32P1	78.7794	0.98321	0.00742225
C6orf48	7131.06	0.982991	2.00472e-27
ASB4	79.7481	0.982425	0.00146764
GSTM4	1524.81	0.981671	2.63573e-27
ARHGEF10	3349.75	0.981261	1.48411e-20
RARRES2	5285.6	0.981175	1.76028e-10
TENM3	2755.61	0.980562	1.78577e-22
AC083899.1	108.92	0.979849	4.43005e-06
PHLDB2	5271.38	0.979028	4.40223e-09
TNNI3	204.98	0.978308	2.46176e-07
CBX7	937.613	0.978174	1.41983e-10
MIR210HG	249.231	0.977905	0.00222374
GRIP2	288.863	0.977169	0.00212575
TMEM255A	638.275	0.976993	1.23947e-06
SKP2	5169.05	0.97691	6.36029e-06
RFTN1	2508.13	0.976859	4.01433e-18
NLRP4	140.521	0.975393	0.029688
SQOR	301.236	0.975348	5.28328e-09
GNGT2	60.857	0.974914	0.00329639
IGFBP6	2175.73	0.974249	3.84271e-12
SEMA4A	163.42	0.974102	0.000224578
MIR22HG	876.977	0.971412	2.78233e-28
TXNRD2	1698.66	0.969891	1.9996e-21
BEND7	460.516	0.969823	1.46365e-13
FHL1	18557.6	0.968986	3.32599e-41
MGAT3	1251.71	0.968943	4.77218e-08
MSANTD3	2120.17	0.967916	4.86273e-25
IGDCC4	762.01	0.966768	7.12066e-11
SLC39A14	6805.43	0.965621	1.35703e-17
SHANK1	153.55	0.965574	0.000358496
HSPA2	2639.02	0.965428	7.11563e-05
LRRC2	129.992	0.965305	3.12861e-06
ASPHD2	456.486	0.96477	7.383e-18
APLP2	27183	0.964237	7.67737e-21
PPP1R26	2889.95	0.963999	1.34188e-22
CMSS1	1886.11	0.963555	9.68303e-15
DLC1	8727.15	0.962948	4.64805e-54
BEX5	103.9	0.962729	0.000174269
CCN5	26.5127	0.962139	0.0212793
LASP1	19014.4	0.961778	4.62189e-21
KLF15	216.436	0.961703	0.00104967
LYRM1	775.588	0.961526	4.49531e-09
LY6E-DT	189.854	0.961102	1.76694e-07
CLMN	1499.99	0.960337	7.77899e-19
HEBP1	1059.86	0.959206	5.25363e-18
AC020904.2	128.767	0.958915	7.82631e-07
BHLHE41	332.202	0.95871	0.00457187
BMPER	162.733	0.958372	0.0212939
AL162171.1	1232.53	0.957848	2.02755e-22
KYAT1	621.628	0.95759	4.96675e-20
AC005586.1	92.4181	0.957185	6.19799e-06
KLRG2	100.549	0.956686	0.000728064
PTTG1	6678.88	0.956216	5.56212e-21
LINC00664	24.1187	0.955701	0.0456842
HOXC13	1296.22	0.95554	1.34847e-13
LINC01224	480.455	0.955459	1.4197e-05
SLC6A15	394.491	0.954213	0.000404141
DAG1	8402.8	0.95386	3.35857e-18
MAP3K14	719.888	0.953836	5.42696e-09
SOCS2-AS1	244.308	0.953458	5.1545e-05
DUSP9	394.386	0.953362	6.80116e-07
AC139491.2	236.388	0.953329	0.000807159
MVD	2075.49	0.953163	5.74043e-08
NDUFA4L2	114.608	0.952963	0.000133367
P4HA2	4210.48	0.951781	5.19611e-21
ALG1L6P	33.2655	0.951659	0.00595541
UHRF1BP1	4704.98	0.951421	2.70882e-08
CAPN2	11550.4	0.95132	1.1998e-15
AC105206.2	53.3923	0.951059	0.00211697
WHAMM	724.845	0.950626	3.26449e-12
NUDCD1	1948.35	0.9504	1.01928e-09
LOXL1	102.296	0.950363	0.000484454
AL161729.4	34.7474	0.949985	0.0135355
RALGPS2	1148.03	0.949886	2.93511e-11
FOXN3	4410.15	0.949082	3.55833e-30
KCNK15	31.2411	0.948114	0.0266857
AKAP2	11074.5	0.947825	5.20402e-27
MORC4	2027.3	0.947571	2.1485e-30
PGM5P2	53.126	0.946407	0.00102279
EBNA1BP2	5155.5	0.946285	1.40539e-22
DAPK1	5388.26	0.946049	1.8255e-39
HIST1H2BJ	99.3783	0.945255	4.38478e-05
SPATA6L	55.3518	0.945192	0.0225167
PANX2	146.588	0.945124	5.47369e-05
AC004816.1	101.014	0.945117	1.66152e-05
ACO1	6073.14	0.944763	1.14542e-25
PYGL	5642.23	0.944683	3.06911e-60
DNAH10OS	45.6418	0.944286	0.0180013
REXO2	5050.77	0.944258	4.32599e-36
FLT4	134.851	0.944023	0.0293217
PPIAP46	150.622	0.943862	8.50501e-09
FAM83H	345.193	0.943286	1.02645e-12
LINC02515	71.4104	0.943045	0.00143791
EVA1A	932.73	0.94285	1.83217e-25
LINC01747	30.5413	0.942745	0.0396919
LINC00668	106.385	0.942715	5.96948e-05
WDR1	12088.5	0.942525	3.75575e-20
IRX4	106.604	0.941568	0.00043619
TTC39B	448.906	0.941045	1.12828e-08
SBDS	6786.19	0.940408	5.47839e-19
PGK1	28199.9	0.937204	1.2383e-08
SGMS1	501.84	0.936658	2.63322e-07
GNG11	5111.31	0.936478	9.98614e-15
PLCXD2	49.071	0.934852	0.0116743
MS4A15	168.097	0.934644	7.55916e-08
AL122035.1	44.9999	0.934341	0.00362638
CNN3	12063.7	0.932922	2.39716e-30
WNK4	1114.05	0.932439	1.40448e-11
AC126773.2	82.998	0.931681	0.000609803
CDHR3	288.372	0.931377	3.15977e-06
AL357033.3	34.969	0.930323	0.020631
CT45A1	1229.58	0.929391	8.01187e-20
MARCKS	3627.18	0.929208	4.57389e-23
MOSPD1	1494.58	0.927544	8.74414e-09
LINC02593	656.239	0.927241	0.00393682
COL26A1	362.579	0.926517	3.45994e-09
NF2	3616.9	0.926428	2.81447e-18
ARHGAP45	1747.78	0.925892	9.24302e-14
LINC02600	73.1274	0.925595	0.000197307
HS3ST3A1	154.944	0.925225	8.62309e-06
SLC25A34-AS1	55.9992	0.925097	0.00188532
C7orf61	25.2121	0.92466	0.0489181
PIP5K1A	3765.17	0.923842	7.88524e-22
AC156455.1	100.194	0.923826	7.01561e-05
BNIP3	2020.18	0.923659	2.7227e-08
AC244153.1	322.524	0.923605	6.99771e-14
LRRN4	75.6615	0.923267	0.00682324
PLEKHN1	170.643	0.923121	3.85336e-06
EIF3D	11749.8	0.923005	3.8223e-13
NPC1	3213.85	0.92266	2.64631e-23
AC010618.4	100.578	0.922293	0.00241134
[truncated: 7,142 more rows]

## Sheet: DEgenes_SW872_YAP-TFE3_vs_EV
Gene	baseMean	log2 Fold Change	padj
AP003419.1	46.0143	21.7817	5.03043e-12
CXCR5	38.3826	19.0806	1.53152e-05
TAGAP	49.231	9.53011	1.05965e-12
DHRS9	55.2464	9.2568	1.88017e-17
RFPL4AL1	48.5818	9.08848	1.11717e-12
LCN2	20.8996	8.97836	2.21748e-10
MAPK4	12.4556	8.71542	0.00728687
CRYAB	8154.74	8.47532	4.34208e-303
CST2	34.3775	8.35691	0.0107498
TNFAIP6	16.9491	8.26207	0.000130543
KLHDC7B	28.7075	8.22226	4.89426e-09
SFTA1P	288.221	8.12381	1.53874e-18
MYH2	23.1887	8.10755	1.15732e-09
AC091951.1	6.78357	8.00493	2.64702e-05
SLAMF7	176.448	7.95763	1.00346e-58
TRPC7	102.667	7.69273	7.40382e-46
NA	12.0435	7.65993	1.64209e-08
RFPL4A	89.1395	7.63902	2.17466e-23
FGF19	32.8471	7.60821	2.42178e-09
LCE2A	7.92885	7.47703	2.27463e-07
AL353743.4	7.12446	7.44935	1.32908e-07
GPR1	155.127	7.44389	1.99924e-28
FGF21	23.9633	7.41714	1.02039e-08
MYH1	5.33571	7.40657	3.87885e-05
NMRK2	40.2395	7.36825	2.83613e-19
NA	5.31882	7.28949	0.000205852
IGKV3-11	7.97503	7.26822	0.013539
AC135977.1	22.0621	7.23523	0.00101033
SPINK1	11.8186	7.2252	5.29045e-09
NA	9.83408	7.18403	0.000104482
NR1H4	131.396	7.17166	2.52903e-32
LCP1	1000.93	7.10096	2.30498e-180
PHF24	57.9882	7.05541	1.04629e-23
NA	16.5134	6.98149	1.16608e-06
MRO	19.7091	6.93223	1.38573e-08
IGFL1	6.41906	6.93062	1.42152e-05
GDF15	313.727	6.83529	2.00201e-39
NA	6.6663	6.69785	0.000163693
SV2B	97.5149	6.65312	1.0493e-45
GALP	19.6084	6.63623	4.852e-09
AP1M2	110.38	6.62859	7.21691e-32
CSTA	29.9604	6.62409	1.82727e-12
AC006435.4	5.20851	6.57783	0.00578321
TMEM144	32.4151	6.55269	9.09661e-07
LUM	18.6945	6.42907	9.76526e-10
MAT1A	731.653	6.4125	1.69696e-195
FBLN5	552.294	6.40736	6.79154e-204
LAMA1	1777.37	6.34861	0
GFI1B	5.10736	6.34334	9.47711e-06
LINC01443	13.6614	6.25435	3.14065e-09
MARCO	27.6742	6.23517	2.37377e-06
UGT3A2	1561.3	6.22002	2.57344e-251
SEMA3E	5.00787	6.17306	0.000321651
LILRA2	15.145	6.14401	4.61872e-11
LINC01293	57.5633	6.1088	3.20375e-15
NPIPA2	22.558	6.07658	0.00208016
NPHS1	7.59258	6.07257	1.35699e-05
AC089983.1	88.3109	6.05758	7.26133e-06
ADCY8	7.41169	6.04879	3.39253e-05
KLHDC7A	24.9132	6.0356	2.04717e-15
LINC01186	8.42811	6.02202	2.11241e-05
NMRAL2P	113.114	6.01544	2.99683e-17
AL159166.1	10.362	5.97445	1.73664e-05
RPL23AP47	7.77961	5.84193	0.00478929
LINC01033	13.5775	5.82223	8.37261e-06
ALOXE3	48.2345	5.80869	3.31502e-18
CCL3	7.46554	5.79092	1.27014e-05
WFDC21P	140.545	5.72945	1.60458e-42
DRGX	5.39033	5.69482	0.00010796
PPP1R14C	7.44137	5.69294	8.18443e-06
AC005307.1	131.452	5.68707	2.25704e-83
AC114296.1	5.97291	5.68219	8.98252e-05
TRPM1	8.30346	5.65664	5.57226e-06
ZNF536	5.60413	5.58835	0.000114473
AC003092.1	11.6684	5.58532	2.1388e-10
LRRC55	12.449	5.55835	5.14596e-08
UGT3A1	24.5467	5.54683	1.15637e-13
LINC00520	22.8813	5.52718	9.5316e-15
TRIML2	231.955	5.48475	1.49162e-148
LRRC15	26.2921	5.48367	4.40292e-18
MCTP1	299.626	5.42797	1.45974e-97
LINC01291	43.4704	5.42384	1.02723e-13
GAS2L2	7.13108	5.38823	1.2183e-05
FRMD7	28.1694	5.36915	7.31101e-19
HLA-DMB	409.405	5.3332	3.83913e-84
GASK1B	12.0993	5.32116	1.82171e-06
HNF4A	25.9329	5.29661	6.0769e-09
IGSF5	89.7224	5.27707	1.39896e-49
DUSP26	18.6584	5.20587	4.08078e-13
AC026785.3	6.53664	5.19812	3.89824e-06
HNF4G	14.3442	5.19589	6.38837e-06
MYHAS	12.2104	5.16902	7.14833e-05
AC005832.4	89.2836	5.15023	5.27428e-06
HYAL4	7.58905	5.14134	1.25551e-05
CES5A	10.8198	5.11919	5.68354e-06
POM121L2	11.5642	5.08626	0.000247987
AL157896.1	13.6485	5.07526	8.95383e-10
PKD1L2	885.888	5.07243	9.50754e-78
AL136962.1	29.1456	5.06405	3.79693e-21
FPGT-TNNI3K	29.6309	5.06093	5.33983e-06
C1S	1174.24	5.04831	4.94033e-88
SLC27A2	45.4861	5.01883	0.000993941
OR51E2	9.55172	5.01644	2.51299e-08
AC079760.2	14.6778	4.99885	1.62491e-08
SPTA1	18.6919	4.99366	0.000172493
CLDN1	777.372	4.98566	1.19605e-68
RRAGD	701.868	4.92153	2.00147e-170
ELMOD1	26.2617	4.87921	9.08433e-19
INHBE	431.566	4.87615	3.97809e-16
BCL2A1	18.6287	4.87337	5.06087e-15
SULT1C2	407.849	4.87152	2.59961e-86
PRKG1	7.24938	4.86856	1.73523e-05
C17orf102	57.6305	4.8568	3.97844e-10
CLEC3A	27.2141	4.85041	2.99821e-15
MYH15	58.5142	4.83604	4.97745e-14
IGHE	6.83855	4.8312	0.00290817
LURAP1L-AS1	37.6579	4.81633	8.82247e-07
IP6K3	192.455	4.79967	4.79256e-135
AC103740.2	6.92252	4.78909	0.000128282
AC132068.1	5.38221	4.78814	0.00212594
MYH8	12.9377	4.75706	5.54241e-11
NAT16	35.3965	4.72891	6.40914e-20
ESRP1	58.5825	4.71691	6.79494e-16
FOXB1	5.49741	4.71145	0.00331667
PCP4	5.45139	4.68724	0.00042153
NRXN3	33.4734	4.66689	0.000170361
SPNS3	24.6211	4.65934	3.45228e-05
AL356234.1	11.886	4.64826	1.76308e-07
CD5L	11.6469	4.64544	1.29918e-06
ERVV-2	60.76	4.62394	3.43707e-34
STXBP6	354.282	4.61766	1.52804e-93
CALCB	23.0098	4.61564	1.79573e-11
LNCOG	57.5927	4.60052	8.48184e-11
AC104257.1	7.05785	4.58535	4.51505e-06
IFI27	399.896	4.58373	9.63254e-40
CASP17P	13.4072	4.56595	3.39654e-09
CSF2RA	877.851	4.52852	4.88583e-142
PSG3	19.0141	4.52797	0.00168374
COL4A3	9.19293	4.50553	1.01771e-06
KRT34	47.2634	4.49959	0.000186206
KCNAB2	1627.15	4.48431	3.21697e-202
TCHH	60.1409	4.47014	8.25503e-41
DUXA	17.7869	4.46868	3.7111e-11
AC112656.1	16.7298	4.45915	9.51852e-08
LMOD1	281.954	4.45589	8.76379e-79
MMP3	9.60447	4.44274	2.06036e-06
AC011503.1	12.2011	4.43581	1.01636e-08
ESR2	84.8578	4.42341	8.46051e-39
TRIM63	9.40242	4.40535	7.81159e-08
AP002478.1	8.76448	4.39152	3.39017e-05
HKDC1	536.458	4.38251	1.30927e-83
TGM4	11.4518	4.38235	0.00432175
TMEM255A	638.275	4.35289	3.95599e-131
RPLP0P2	306.694	4.34562	8.26705e-99
SLC6A12	262.089	4.34244	1.60105e-47
XIRP1	24.7075	4.31676	0.0100018
DSG2	34.9501	4.30202	5.55162e-16
CHST4	31.9593	4.29729	2.56494e-15
AL645608.7	11.7846	4.29047	1.5743e-06
ENPP5	15.1301	4.28306	7.70076e-09
PPARGC1A	48.4817	4.27836	5.96696e-20
USH1C	6.3382	4.2774	0.00020842
LOX	1600.91	4.27309	6.39584e-120
CEACAMP10	596.362	4.26681	2.17404e-28
TSPAN13	149.312	4.2618	3.01315e-60
DOK5	5.43419	4.2603	3.37211e-05
GUCY1A2	7.36927	4.25306	0.00446319
VLDLR-AS1	123.311	4.2528	4.21107e-19
SH3GL3	111.995	4.24838	1.13722e-56
KCNQ1	14.7247	4.2321	4.59413e-08
AP003498.1	6.75928	4.23052	0.0256908
RASGRP3	66.3907	4.227	9.62035e-12
GPR65	19.0007	4.16756	4.84411e-08
DAPL1	8.67889	4.1608	1.92374e-06
LINC00571	5.73487	4.14263	0.000146971
CELF2	578.24	4.14119	8.98852e-135
RHCG	42.3635	4.11591	2.50686e-25
LAMP3	296.148	4.08108	1.90653e-49
PINCR	8.62195	4.07326	0.000229825
BTK	23.7754	4.0731	9.66751e-10
FAM90A12P	21.0836	4.05771	3.94499e-05
BTNL8	8.48775	4.05605	1.51611e-05
TUBA3E	22.9587	4.04369	7.47723e-19
MEGF6	249.491	4.03829	4.77727e-28
CLGN	74.7607	4.03552	2.62856e-14
UPP1	3542.44	4.03444	1.26792e-94
AC126768.2	6.37666	4.03366	8.56152e-05
AC107871.1	14.4419	4.02167	0.00471987
TSLP	16.8347	4.01551	1.12766e-08
AC069120.1	17.9285	4.01332	2.22489e-13
SUN3	13.0269	4.00943	2.20463e-07
EPB41L4A	28.5938	4.00443	5.39153e-08
GPNMB	7636.76	3.99466	6.58201e-139
ASS1	1006.36	3.98755	3.67421e-22
DYNC1I1	48.1709	3.98094	1.52058e-25
FAM163B	39.1843	3.98063	7.50256e-21
AC018529.2	5.13035	3.95978	0.00253374
HSPB2-C11orf52	15.992	3.94848	0.000842266
CCL15	16.1285	3.94438	1.02787e-08
LINC00862	29.78	3.93743	5.04061e-17
BIRC7	6.40802	3.92421	3.10818e-05
AC079298.3	24.942	3.91941	3.58638e-17
AL392023.1	7.4105	3.88868	0.0480385
KLK8	6.26611	3.88797	0.000126712
GCNT3	25.1832	3.88531	5.49588e-06
CPNE4	26.7578	3.87428	3.50436e-09
LINC01665	8.0395	3.86113	0.000927408
TMEM191B	32.2656	3.85483	5.20488e-14
IL32	397.832	3.84987	8.144e-46
CDX2	10.1381	3.84278	0.000154171
AL117378.1	78.3349	3.83387	8.52167e-55
ITGB3	1822.99	3.83158	2.48147e-200
LINC01638	242.897	3.82454	6.52174e-66
LINC02412	11.2467	3.81763	3.65271e-06
IL6	31.6535	3.81285	5.7973e-13
SLC9A4	21.2956	3.80225	1.52417e-08
AC018781.1	5.2134	3.79482	0.0191481
EFEMP1	741.11	3.79016	1.77587e-89
DIRC3-AS1	14.9469	3.78536	0.00214438
KLK10	11.5789	3.77036	2.66318e-05
GRIK5	70.4144	3.76806	7.76896e-15
IGFN1	141.204	3.75803	2.81078e-12
GPC4	272.305	3.75426	3.14402e-75
MUC4	25.8387	3.75198	4.92934e-05
C7orf57	122.246	3.74373	1.79892e-38
LINC02273	6.80735	3.74191	9.09795e-06
MME	72.1838	3.73611	5.16925e-10
AC097359.2	179.041	3.7264	6.34497e-68
GREB1	310.331	3.70077	1.22803e-69
UGT2B7	35.2261	3.70028	1.30586e-18
MAFF	607.032	3.69949	1.46716e-96
GJB3	26.3413	3.68552	3.097e-10
SYTL2	1943.87	3.68481	8.27474e-86
IL21-AS1	5.39451	3.67978	0.00181714
PPFIBP2	404.168	3.67771	5.80048e-44
STX11	126.227	3.64566	4.59225e-37
MSC	323.687	3.64481	1.00608e-22
SLC45A2	191.819	3.6378	4.4688e-69
SLC6A15	394.491	3.63552	1.12058e-52
DEGS2	11.734	3.62989	2.49132e-05
FREM1	20.5574	3.62838	2.26597e-09
PIWIL2	12.986	3.62273	1.65871e-07
AL035425.1	9.15691	3.62161	5.57095e-07
GIMAP8	25.8314	3.59528	1.4946e-09
KRT17	109.933	3.58818	9.62468e-10
TEX29	11.5983	3.58027	5.84596e-07
LINC01198	6.3356	3.55268	0.0022704
AC007406.3	8.75319	3.55154	0.000229314
MYO7B	109.193	3.54903	0.000350003
TMEM63C	137.721	3.54569	2.54007e-29
ARFGEF3	55.4251	3.54483	7.6777e-23
SLC34A2	6.87701	3.54226	0.0111595
SUSD4	14.8044	3.5415	0.00246062
FGF9	5.68054	3.53758	0.0236284
RTN4R	369.646	3.53592	1.88989e-105
HSPB3	33.7164	3.53141	1.35513e-11
KIF6	184.979	3.52867	2.28352e-34
TMEM200C	23.7165	3.5284	0.000141844
PPM1H	121.353	3.52536	2.57179e-32
AC005336.1	13.3981	3.5252	7.20475e-08
AZGP1	71.0359	3.52448	1.40956e-33
TMEM233	90.4513	3.52055	8.33497e-23
SLCO5A1	8.83463	3.51404	4.68955e-07
SPX	445.586	3.5121	1.13739e-18
LIMS2	478.474	3.512	6.61195e-87
GPX5	5.59301	3.50868	0.00123799
LINC00592	5.24462	3.49617	0.0422251
PRAMEF1	8.70867	3.49189	0.0358084
GDNF	9.64414	3.48979	6.59159e-06
AC124947.1	10.904	3.48398	1.17024e-05
TM6SF1	340.581	3.47642	5.82326e-24
STC2	5840.25	3.47611	1.42642e-32
TMEM132E	67.2506	3.47253	1.53484e-11
PKD1L3	9.86706	3.47149	4.65891e-07
INSYN1-AS1	10.6261	3.46633	0.000118904
BLVRB	2573.36	3.45305	1.74246e-230
FLNC-AS1	13.8951	3.44885	6.01597e-07
AL023881.1	23.0707	3.44712	4.54428e-09
AL136018.1	8.41107	3.43682	3.55652e-06
CTH	928.961	3.42725	6.09751e-31
GDAP1L1	48.3384	3.42678	1.71295e-11
SIRLNT	31.6526	3.41712	4.35784e-12
DDIT3	1960.79	3.41335	2.68269e-17
CNTNAP4	6.29919	3.40167	0.0043095
LINC02535	49.6485	3.37644	2.60837e-10
ESR1	33.6611	3.37084	3.22443e-05
DEFB1	27.2725	3.36351	1.31845e-15
AC090192.2	8.54804	3.35989	2.40185e-06
AC092132.1	5.10503	3.35887	0.0235526
ELOVL7	65.4793	3.33307	3.91367e-17
RIMS4	97.0528	3.3316	7.23472e-31
IL34	16.7684	3.31885	5.32483e-06
SLC7A11	1423.96	3.31769	1.27338e-10
GIMAP5	56.1384	3.31729	1.43858e-22
KCNF1	83.962	3.31697	6.56206e-30
CHRM4	157.72	3.31532	5.85197e-62
OSCAR	347.156	3.31363	1.4994e-37
KLF15	216.436	3.3131	3.18508e-38
AC079209.1	7.97549	3.30698	2.34467e-05
LINC01133	24.0646	3.29806	2.29788e-06
SLC5A1	28.641	3.29763	5.25972e-16
TNFSF9	133.004	3.29485	1.00818e-47
CTNND2	5.41834	3.29327	0.0193538
CD209	25.4177	3.28214	4.63291e-10
CYP4F11	312.264	3.28196	4.34399e-90
OSGIN1	933.224	3.27852	1.74436e-42
TMEM151A	32.3752	3.27781	7.84095e-16
NEBL	269.678	3.27415	3.78811e-24
AL035425.3	8.58736	3.27394	3.65763e-05
BEX2	181.767	3.26573	5.58075e-20
INMT	744.697	3.26408	8.26021e-160
PAPPA2	59.5562	3.26333	4.75668e-08
OTOF	23.8113	3.25819	9.2816e-09
AKR1C3	83.7243	3.2498	1.4086e-26
TNMD	57.1897	3.24933	6.42631e-12
POF1B	5.72077	3.24037	7.67167e-05
AC034213.1	7.87594	3.23206	0.00166287
AL596223.1	39.3207	3.23088	4.21779e-13
NUPR1	3841.86	3.22884	9.58911e-23
AC068234.2	7.24424	3.22378	0.00027208
TM4SF19	104.744	3.21853	1.87836e-28
TNFSF15	89.0339	3.20743	1.32718e-29
ADM2	805.235	3.20221	1.0057e-16
EFNA5	8.79234	3.1869	0.000366821
GRM1	7.55745	3.18631	0.000951476
CX3CL1	347.803	3.18457	3.35454e-63
CLIC6	238.71	3.18283	6.96235e-82
CPA4	8124.8	3.17201	3.77801e-86
AL590004.3	1289.95	3.17182	4.09009e-53
AC116351.1	130.567	3.17088	4.07102e-37
SLCO2B1	28.3071	3.16871	0.0028929
RASAL1	6.47577	3.16103	0.00630951
CHMP4C	55.1236	3.15635	9.77202e-22
OLIG2	29.1682	3.15398	6.75677e-08
FAM129A	2074.6	3.15291	1.42214e-36
ANK2	166.382	3.15287	6.94913e-16
KRT73-AS1	27.9072	3.15233	4.80726e-08
DLGAP1-AS2	423.872	3.15222	4.42248e-43
PLCH1	39.1546	3.15147	6.71313e-18
NFASC	750.118	3.15055	1.14467e-229
LINC00677	5.4761	3.14954	0.00236336
SLC6A4	13.8468	3.14534	3.28296e-05
AL353608.3	5.07783	3.14522	0.00749138
NAP1L3	138.96	3.129	5.11538e-51
USP41	16.7344	3.12804	0.000614349
FLRT2	25.5844	3.12525	0.000360729
CCN2	8122.71	3.12333	1.80124e-57
FOLR1	159.009	3.11075	1.31878e-26
FAM87A	25.2478	3.10536	9.56582e-06
NOX4	6.12414	3.09712	0.000830001
PPP1R15A	3154.01	3.09687	7.36868e-53
NTN1	74.0974	3.09402	2.80717e-19
SNTB1	288.127	3.09384	1.30237e-26
CCR2	6.62968	3.09346	0.00087896
CLEC4M	17.5232	3.0891	3.47855e-09
NA	10.2887	3.08546	1.49639e-07
RPL12P14	37.5438	3.08437	1.92809e-12
KRT80	1730.68	3.07502	1.8546e-42
GSG1L	10.2728	3.06693	0.00143059
FAM201A	45.6417	3.06459	3.53407e-10
NPAS1	1188.24	3.06331	1.33116e-200
COBLL1	11.2317	3.06204	0.00122735
AC026369.2	7.99023	3.06065	6.69507e-05
AP001189.5	7.63295	3.05151	0.00152517
PSG4	1067.99	3.05111	3.90628e-34
AL138828.1	7.5723	3.04715	0.00284823
MSC-AS1	127.993	3.04681	5.85695e-16
ACTN2	42.192	3.04639	2.40298e-12
FUT9	6.49536	3.04364	0.000295428
AL356515.1	15.8961	3.04164	2.15856e-08
BHLHE41	332.202	3.03842	1.22021e-24
AL157871.2	14.4967	3.03705	8.7004e-07
PSG7	92.8379	3.03647	2.23136e-05
VSX1	30.1775	3.03493	5.20826e-18
MB	5.19096	3.02579	0.0447594
RASGRF2	415.796	3.02527	5.29537e-29
AKR1C7P	9.92129	3.02138	8.66553e-05
INSYN1	368.995	3.02059	3.69449e-80
AC026316.2	27.2299	3.012	0.00464357
AL162582.1	8.23878	3.01137	0.00027194
AC016717.2	5.2611	3.00631	0.0483326
ZNF114	507.117	3.00183	5.26889e-47
CADM1	234.848	2.99956	2.16998e-28
SLC22A15	397.329	2.99861	7.31737e-21
P2RX7	1431.08	2.998	5.36797e-95
CALB2	75.5926	2.99798	7.90088e-25
FAM198B-AS1	6.61087	2.99522	0.000354525
HES4	110.14	2.99346	8.45341e-29
PLIN4	68.6546	2.9919	1.90984e-35
AKR1C1	12.1303	2.9832	8.94862e-07
HSBP1L1	284.455	2.97064	1.97878e-80
AC093752.2	6.83195	2.97042	0.0239981
AC245100.3	41.7872	2.96503	3.4444e-07
LUARIS	40.9259	2.96383	3.04515e-14
SDS	76.3098	2.96245	7.67823e-25
AC010457.1	11.6086	2.95671	0.000505061
PRDM16	35.2082	2.94794	1.34246e-07
PNPLA1	6.64908	2.94781	0.00170254
TRIM29	531.289	2.94422	4.443e-34
CTSS	708.567	2.94406	1.01685e-79
FAM166B	10.4288	2.94392	2.68927e-05
AL136131.3	28.3149	2.94184	4.11359e-07
HS3ST5	7.6383	2.93988	0.0116169
AGT	33.3491	2.93751	1.36277e-16
ERICH2	16.0875	2.93686	3.2793e-06
UCA1	6683.97	2.93642	6.74126e-45
TNFRSF12A	3033.22	2.9364	7.06861e-85
CYP2A6	5.28711	2.93401	0.00466108
FAM110C	6.64106	2.93349	0.00208871
AC015987.1	29.6551	2.93286	3.06828e-12
CRLF2	21.3526	2.92646	0.0001343
LINC00973	7.72761	2.9257	0.00224717
LINC01914	16.0244	2.92498	4.41917e-06
ERC2	65.388	2.92451	1.05945e-09
ANKRD1	2371.13	2.92211	6.94883e-11
AL354872.2	5.40953	2.92032	0.0158653
AL360181.1	9.88406	2.91766	1.59617e-05
DLL3	453.786	2.9125	1.10722e-79
PTGDS	58.4352	2.91023	9.32608e-13
AC245100.6	52.1792	2.90403	6.91062e-08
ATP1A4	7.5988	2.90141	0.00159422
CELF2-AS1	7.07046	2.89841	0.000399421
BARX1	13.6383	2.89713	1.85514e-07
AL162731.1	8.49056	2.89589	0.000316459
ASNSP1	400.97	2.8953	3.61373e-19
AC005291.2	13.6435	2.8884	0.000370263
AL035681.1	15.3852	2.88655	2.01337e-05
PTPRR	11.794	2.88516	7.18366e-05
PSG2	45.1866	2.88468	0.0072156
UROC1	5.98647	2.8796	0.00254923
BANF1P2	14.7537	2.87814	3.86809e-07
AC018816.1	5.31245	2.87057	0.0113463
RENBP	435.678	2.86283	1.03631e-38
C10orf90	19.7804	2.86221	8.26346e-06
PPP4R4	23.0223	2.85688	3.74611e-07
AL445470.1	24.9795	2.85644	8.43404e-11
AC016559.2	5.41504	2.85616	0.0125178
JAML	5.84498	2.84713	0.0198715
NA	53.4927	2.84616	2.56839e-14
CASP12	10.778	2.84264	4.7186e-06
CEACAM1	714.137	2.83876	2.1693e-51
CLIC2	109.973	2.83642	8.98145e-37
AC100802.1	90.9925	2.8346	7.6037e-06
FABP3	256.539	2.83098	6.75554e-27
AC093330.2	11.4323	2.82649	8.56352e-06
AL009178.2	8.64126	2.82628	0.0455035
UNC5A	9.61446	2.8247	0.00025185
AL355312.1	21.5197	2.82245	2.44003e-11
FAM90A24P	23.254	2.82124	1.02909e-06
LINC01730	59.1221	2.8212	1.78128e-17
SLC27A6	5.31302	2.81557	0.00192132
IL6R	802.327	2.8151	4.40599e-77
CNN1	297.693	2.81351	8.92345e-19
SLC47A1	75.6405	2.81323	2.86447e-24
NMNAT3	18.8127	2.81284	1.45939e-08
CES1P1	26.6288	2.81261	0.000214326
TMPRSS3	63.8542	2.81082	1.98774e-16
NAT2	41.5149	2.81028	9.84675e-18
ARMH4	65.3878	2.80293	6.28748e-08
AL451069.1	7.15026	2.80276	0.0486351
PAX7	19.0367	2.80124	4.77204e-09
AL035665.1	22.9401	2.80096	1.57517e-09
NA	26.5706	2.79926	3.16524e-05
AC136628.1	42.0786	2.79078	4.17523e-10
FEZ1	659.636	2.78039	1.23758e-86
SERPINA1	129.249	2.77821	7.73155e-30
LINC00239	13.3766	2.77733	0.000404381
AC084783.1	9.84827	2.7761	0.000742861
LHX5	8.73944	2.77536	0.00784418
IL31RA	161.121	2.77243	3.42146e-27
HSPB8	1436.39	2.7703	7.55623e-116
LINC00632	86.5282	2.76983	1.60193e-29
PSCA	27.2928	2.76745	6.7049e-09
CST7	33.3339	2.76322	4.58894e-11
AC095350.1	25.6082	2.7626	3.42538e-05
IRS4	15.162	2.75903	1.31539e-07
CLIP4	1736.45	2.75869	2.0117e-47
NUDT10	44.6884	2.75631	2.47775e-17
SLC40A1	15.4779	2.75428	1.88863e-06
C6orf223	35.0525	2.74429	1.25973e-07
AP003064.2	24.9414	2.74409	0.000119175
BICDL1	37.5426	2.74285	3.52243e-08
MBP	3639.44	2.74238	6.54239e-61
JAKMIP3	45.861	2.7414	1.58845e-18
PRR20G	7.20683	2.74056	0.0159906
FHIT	33.5107	2.73527	0.000214127
HSPB2	71.6116	2.72887	1.3043e-08
SHISA3	161.73	2.72595	4.55243e-21
TNIP3	7.61168	2.72511	0.00229725
TMEM92-AS1	16.1106	2.7243	0.000466357
AC091806.1	113.723	2.7236	2.24154e-20
COL2A1	456.062	2.71959	2.15559e-33
ALCAM	37.5207	2.70698	0.000214127
LINC00689	9.95143	2.70615	0.000365524
AC023813.3	9.99848	2.70573	1.21629e-05
OLFM2	487.25	2.70544	1.86733e-50
PIFO	13.243	2.69817	0.00394899
ANO4	74.032	2.69511	4.20235e-23
RETREG1	298.044	2.69269	2.13056e-28
KCNK10	7.69593	2.69043	0.00045605
COL4A4	16.5261	2.6829	1.92335e-07
ADAMTS14	70.3509	2.6813	9.14807e-21
HRH2	76.3752	2.67984	1.85471e-13
APOL1	4140.76	2.67634	3.15662e-103
AC090241.2	9.36514	2.67504	0.00423625
CXADR	430.958	2.67338	1.93334e-52
MMP19	140.861	2.67255	4.88564e-24
INHBC	11.5384	2.67222	0.0018753
TRPM8	19.6328	2.66693	9.43922e-07
SMIM34B	6.9766	2.66569	0.0090717
NEK11	62.0841	2.66486	4.76998e-10
MRGPRX3	70.9189	2.6644	1.06513e-13
ICAM1	10019.9	2.6602	1.44076e-72
AC004817.3	15.8235	2.65994	2.07789e-05
HRASLS2	6.31902	2.6557	0.00406111
ATF3	836.543	2.65264	7.49224e-23
ILDR2	71.7615	2.64842	5.11174e-07
PMEL	53.4847	2.64693	3.26659e-16
CES1	60.9109	2.64693	1.02679e-11
SMPDL3B	107.508	2.64501	8.59735e-26
TUNAR	7.53494	2.64454	0.00339066
LINC01822	12.2625	2.64438	1.27939e-05
AL353807.3	42.6629	2.64359	1.60246e-19
GLI1	189.012	2.63813	3.85782e-16
AC069209.1	17.5623	2.62504	5.63629e-08
ZNF185	2431.65	2.62345	1.95364e-134
LINC01693	25.86	2.62143	2.92068e-05
AMOTL2	5194.21	2.61702	2.42188e-151
COL12A1	7146.72	2.61566	1.55371e-87
AL713998.1	83.7557	2.61014	1.25925e-11
CHAC1	753.122	2.60999	2.55753e-09
CPEB1	414.47	2.60996	2.50633e-43
C1orf158	8.46955	2.60074	0.0125484
AKR1B10	66.9403	2.59874	8.14292e-06
CXCL16	487.481	2.59749	1.10296e-60
SH2D4B	5.65737	2.59662	0.0104212
BTF3P14	5.48924	2.59086	0.0046149
NA	5.05847	2.59056	0.012422
EXPH5	144.926	2.58722	1.54151e-25
AIPL1	5.95694	2.58431	0.00750873
TP63	52.1614	2.58391	1.49636e-16
AC091114.1	7.89305	2.58367	0.00323035
SPP1	3358.99	2.58231	5.86975e-28
TEX37	13.3423	2.58219	0.000233369
STX7	2097.8	2.58102	9.20266e-98
AKR1C2	5.27357	2.57801	0.0279043
TMEM71	20.6512	2.57571	6.08577e-05
CAMK2A	27.2806	2.57364	4.5208e-07
AC007405.1	12.0892	2.57067	0.00199447
GALNT18	150.014	2.57058	1.38424e-27
LUCAT1	124.736	2.56919	3.0335e-09
PARD3B	69.0579	2.5691	1.06485e-10
SULT1C2P1	6.30678	2.56869	0.0125916
IFRD1	3961.51	2.56719	1.47851e-26
WARS	18975.3	2.56469	4.2265e-41
ACSM5	100.295	2.55851	1.4516e-25
SERPINE1	2089.77	2.5573	5.60891e-55
CLSTN2	328.291	2.55213	3.32949e-27
SHANK2	32.4746	2.55119	0.0121126
AC139530.1	15.0549	2.54911	1.62231e-05
CD55	1726.45	2.54904	6.42496e-159
KLF4	330.165	2.5482	5.31358e-20
KCNJ11	20.3453	2.54709	0.000256453
ASB18	18.3513	2.5436	0.0321469
DUOX2	14.3222	2.54351	0.0496695
SNORD63	6.64902	2.54097	0.00729887
CNKSR2	12.9303	2.53656	0.000420388
SAA2	14.6963	2.53417	0.0117368
MMP28	50.4422	2.53301	2.93953e-12
FAM180A	81.8817	2.53195	1.45733e-10
FKBP9P1	272.662	2.53118	1.13476e-16
OCLN	724.086	2.52656	3.29802e-31
AC126177.6	5.30939	2.52481	0.0178986
MYOZ2	10.3989	2.52188	0.000252438
RBPJL	20.9217	2.51944	4.82417e-05
USH2A	6.13441	2.51873	0.00514014
LINC02105	10.1719	2.51643	0.000170877
RUNDC3B	6.94683	2.51104	0.00818944
MGAM	11.9121	2.50809	0.0130928
AL133445.2	5.02961	2.5051	0.00561308
TNNI1	87.9705	2.50432	0.0138027
SEL1L3	3269.86	2.49946	4.2175e-85
BMP2	67.0867	2.48935	7.61851e-14
LINC02234	6.16608	2.48583	0.0324256
LRRC2	129.992	2.48416	2.15938e-44
AC007611.1	51.1288	2.47616	8.72061e-15
ITGAM	10.1788	2.47365	0.0242285
CCND2	40.5571	2.46871	0.00237982
KCNJ4	60.1092	2.468	5.20068e-20
SLC38A8	6.68401	2.46559	0.00556545
AC087667.1	30.9584	2.46442	1.66267e-08
NLRP3	205.315	2.46296	2.38965e-23
DCDC2	6.2636	2.46208	0.00108508
NA	43.8009	2.45968	2.06896e-06
RASGRF1	134.707	2.4594	1.98978e-16
IL21R	123.001	2.45726	4.82197e-09
IL20RB	107.38	2.45671	5.25771e-10
SMIM2-AS1	22.9391	2.45425	9.59307e-08
SLC16A4	951.418	2.45404	6.30577e-104
OCA2	53.4287	2.45278	6.85101e-13
LYPD6B	296.048	2.45266	8.26624e-23
DUOXA1	48.4129	2.45138	9.2267e-12
RNF165	34.7266	2.44906	4.4852e-08
TNFRSF9	304.31	2.44524	3.10837e-21
TPRG1LP1	5.18297	2.44246	0.0130714
GOLGA8IP	12.8711	2.4422	0.0148412
LINC00900	27.3923	2.43779	1.29925e-05
IFITM10	41.8579	2.43614	4.62613e-10
ZSCAN4	7.35073	2.43241	0.000610515
TMEM40	73.2242	2.42583	6.73474e-13
ERVFRD-1	10.9907	2.42486	4.71632e-05
SLC39A8	375.94	2.42028	6.92829e-47
IFI6	1717.79	2.41996	3.86399e-43
AL162430.1	7.26001	2.41659	0.00543688
HPN	16.5286	2.41495	0.000187863
NKD2	30.1177	2.41446	4.71106e-06
CAVIN2	121.51	2.4142	0.000285246
AJUBA	9629.72	2.41295	1.0403e-45
XAGE2	41.3068	2.41105	1.06243e-09
AL669918.1	106.712	2.41104	0.0128275
AC104958.2	10.5823	2.40689	0.000159813
MORC4	2027.3	2.40605	1.44257e-205
LINC02487	24.112	2.40394	5.76393e-06
NYAP2	8.48815	2.40199	0.0295139
LGALS12	389.182	2.40038	1.08307e-20
MYCL	127.961	2.39811	2.80027e-19
AC237221.1	6.0926	2.39366	0.00378553
CDH7	14.0578	2.39129	0.000199875
TFCP2L1	94.356	2.38724	2.85641e-12
AP001025.1	5.74386	2.38389	0.0146024
SULT2A1	70.4659	2.38371	1.10326e-14
SLC7A11-AS1	23.4096	2.38308	0.0332806
ANGPTL1	9.29403	2.3812	0.000489026
HLA-F-AS1	194.562	2.37876	1.64316e-34
HRASLS	31.7142	2.37447	1.69424e-07
JAKMIP2	22.7736	2.36985	7.55845e-05
PRRG3	58.4442	2.36775	7.62778e-05
AC069528.2	12.1933	2.36772	8.12317e-05
ENPP1	221.023	2.36706	1.09106e-50
KIAA1211	73.818	2.36009	1.21787e-17
LINC01659	10.8898	2.3567	0.00020858
MOV10L1	49.2002	2.35443	8.16017e-08
TENM2	351.633	2.35317	1.66163e-06
PCMTD1P2	10.2432	2.35037	0.00025628
RPSAP70	9.18228	2.34789	0.00123316
AC148477.4	20.9268	2.34684	1.1565e-06
SLC16A14	23.9612	2.34155	6.97935e-06
ABCG2	617.269	2.33887	2.02153e-27
PRKCB	1065.83	2.33877	3.79281e-45
SBDS	6786.19	2.33837	3.97094e-116
DTWD2	108.14	2.33787	1.29828e-14
SRPX2	1641.57	2.33638	5.42993e-43
KITLG	103.265	2.3357	3.50889e-17
NFKBIB	708.964	2.33339	1.95886e-49
OASL	87.8918	2.32991	3.00479e-17
KCNB1	28.105	2.32989	2.92024e-10
AL583722.1	7.09255	2.32947	0.00726041
NEFL	99.3576	2.32946	3.74016e-09
SLC25A30	977.353	2.32899	9.68346e-51
AC130371.2	6.42809	2.32875	0.0198386
FAM149A	27.5405	2.32824	5.27741e-08
SLIT3	447.797	2.32705	2.67983e-46
CCDC170	11.1138	2.32641	0.00119218
BHMT2	687.404	2.32332	9.27584e-47
NGF	85.1259	2.32282	2.95439e-05
NA	98.2864	2.32187	1.93974e-18
LHX8	280.786	2.32164	5.17312e-23
DRP2	72.5122	2.32162	2.78087e-23
FAM19A2	35.6448	2.31696	2.01543e-10
CREB5	770.273	2.31589	1.93974e-18
AC009185.1	7.80116	2.31491	0.0114463
FBN2	312.303	2.31442	1.13233e-13
ABCB4	14.8942	2.31343	0.0094193
RIMS3	590.982	2.31192	1.87459e-13
AC079160.1	5.1875	2.31107	0.0150614
DNAH10	134.537	2.30802	4.06547e-09
ZFP91-CNTF	25.6531	2.30553	0.0363869
TRIB3	8474.98	2.30437	1.86878e-11
PLA2G4C	169.802	2.30393	3.43376e-17
LBH	542.265	2.30068	1.59237e-20
NCF2	11.7639	2.29845	0.00477822
POU3F3	5.20792	2.2979	0.0244951
ADGRE4P	80.4851	2.29761	7.57958e-11
ANKFN1	98.2236	2.29707	7.62092e-17
BDKRB2	161.389	2.29437	5.45615e-23
CEACAMP11	8.4405	2.29426	0.0127533
AC104051.2	48.8454	2.293	7.86479e-09
RAET1E	123.762	2.29262	6.9036e-34
AC107884.1	35.0095	2.29082	7.65004e-06
BASP1	2291.35	2.28932	5.21519e-53
GUCY1A1	12.0169	2.28895	0.00295827
TUBA8	48.3266	2.28515	0.000229052
EBI3	130.714	2.28511	8.8333e-22
ATP1A3	357.023	2.28397	1.20994e-22
MAGI2-AS3	9.25664	2.28351	0.00906697
SLC7A3	41.6683	2.27993	5.06366e-06
NANOGNB	5.1636	2.27864	0.0293032
GADD45G	16.8632	2.27638	5.21811e-05
AC107956.1	22.9916	2.27363	3.12946e-07
AC025754.2	7.41742	2.27302	0.00466226
LINC00623	78.4135	2.26834	1.41944e-10
LINC01473	10.6788	2.26784	0.000825768
HLA-DRB5	31.7032	2.26723	1.05397e-07
AC011944.1	11.9147	2.26553	0.00455125
LPO	43.9406	2.26338	6.86433e-06
CRYZL2P-SEC16B	94.8065	2.26332	1.40186e-10
GBP1P1	7.21517	2.26062	0.00283981
FAP	92.1569	2.25733	2.21836e-12
CASP4	3032.87	2.25633	2.03092e-193
LINC01511	8.69732	2.25254	0.0363811
RPS6KA2	1707.93	2.25206	1.24229e-45
AC073610.3	16.2154	2.25105	0.00111637
SPRYD7	559.732	2.24973	4.09356e-89
MPO	8.83037	2.24943	0.0139292
PDCD1LG2	137.941	2.2445	1.67016e-19
CARD11	487.364	2.24032	7.68121e-28
WTIP	955.442	2.23072	5.27694e-33
AC010247.2	13.4253	2.22964	0.00390722
APOE	6958.01	2.22713	4.49381e-30
RAB32	1770.46	2.2263	3.18698e-73
CACNA1B	179.537	2.22561	3.60854e-22
VEGFA	2322.71	2.22039	1.08395e-16
TRBV11-2	5.0286	2.22001	0.0304674
SULT1A2	161.296	2.2151	5.02518e-26
AC104129.1	41.0341	2.21462	3.87546e-07
MYOSLID	13.695	2.20776	0.0246213
AC090673.1	7.81212	2.20772	0.00681836
AC148476.1	31.4367	2.20685	1.76799e-08
MALRD1	7.12536	2.20664	0.0045713
LCNL1	5.08365	2.20495	0.0463954
TSPAN33	331.382	2.20411	7.33667e-50
RND3	1363.69	2.20325	3.16403e-11
SLC9A3	209.205	2.20022	1.49527e-23
PARP8	150.969	2.19896	6.58738e-22
SSR3	5937.32	2.19661	4.24237e-196
LINC01220	13.8709	2.19645	0.0117528
PLXDC2	20.0072	2.19403	1.92516e-05
SLC17A5	973.125	2.19234	2.18112e-50
VENTX	11.2406	2.1845	0.000481182
LINC01477	7.23512	2.18345	0.006481
AP000446.1	357.059	2.18312	1.8719e-41
CDH12	46.7883	2.17826	2.01662e-10
SLC2A3	3270.07	2.16829	7.51842e-23
PTCHD1	9.55972	2.16569	0.00725864
SLC4A9	9.43517	2.15883	0.0096564
PLA2G16	1773.07	2.15863	1.24949e-58
OTUD1	108.539	2.15729	1.65009e-26
DHRS3	27.8973	2.15393	5.40842e-06
CAVIN4	73.9984	2.15234	1.42296e-19
AL138902.1	7.24001	2.15173	0.016851
ITGAD	14.892	2.15136	0.00643249
AC016924.1	5.24745	2.14675	0.029434
KCNJ10	12.2302	2.14592	0.0030038
TMEM56	329.454	2.14375	1.65002e-24
LINC01764	8.55925	2.1437	0.0124032
AC078905.1	7.96788	2.14298	0.00339723
AC099786.2	59.7605	2.14174	4.55185e-15
TMEM176B	11.609	2.1414	6.06878e-05
ALK	6.84783	2.13839	0.0189329
SOX8	41.9755	2.13784	1.49082e-14
CX3CR1	5.95625	2.13625	0.046968
C1QTNF5	673.499	2.13592	2.3511e-33
AC011511.2	6.93615	2.13362	0.0131117
AC243972.1	13.6186	2.13062	0.000932496
ACP5	1625.18	2.12895	1.03893e-28
PRSS16	79.4704	2.12808	1.66886e-14
NAMPT	5630.17	2.1279	6.01655e-24
RNF180	25.277	2.12373	3.28349e-05
AC009238.1	10.0332	2.12368	0.0167252
AL138955.1	8.75616	2.12189	0.00115875
SNCA	34.7205	2.12108	2.25514e-09
PLIN5	41.5987	2.12052	5.97155e-08
EGF	82.7844	2.12008	1.45258e-10
OOEP	184.838	2.11921	5.42538e-39
IL33	11.3258	2.11709	0.00339993
AC105105.1	257.262	2.11545	2.81347e-05
ITIH5	73.0415	2.11278	1.62426e-08
PADI3	60.4905	2.11201	5.2371e-05
TEX15	71.5612	2.11164	1.05883e-11
LINC01546	5.25742	2.10689	0.03081
NA	11.8782	2.10606	0.00131798
LINC02663	5.13244	2.1056	0.0163996
AC008663.2	6.85397	2.10305	0.00843591
ULBP1	1094.42	2.10286	1.90857e-28
CSMD2	15.3385	2.09981	0.000114602
AC092384.2	8.42292	2.09778	0.0445162
SAMD5	74.5849	2.09668	5.16584e-15
PALMD	192.652	2.09397	2.84409e-24
HINT3	485.571	2.09344	1.41945e-20
SEC16B	132.872	2.0932	6.12846e-11
RSAD2	15.7085	2.09293	0.00813104
IL17D	149.042	2.09133	6.49459e-22
SLC13A5	229.875	2.08986	1.76679e-18
GLB1L	3888.37	2.08735	5.60291e-63
AC009041.2	47.1913	2.0858	1.01688e-10
ARC	110.273	2.08502	1.15344e-09
HRK	25.9512	2.08457	0.00405996
CYP1A1	206.194	2.08368	1.03079e-24
FMO4	51.198	2.08275	4.89705e-08
EDNRB	780.204	2.0823	9.88688e-55
SBDSP1	833.121	2.08172	1.52417e-26
AC007406.4	5.49941	2.07997	0.0149768
AC078845.1	11.0976	2.07996	0.00156911
MAP3K15	28.1466	2.07919	5.03913e-05
LINC02613	5.09035	2.07729	0.0278902
NA	23.5932	2.07572	5.09249e-06
STON1-GTF2A1L	83.3021	2.07414	1.95455e-10
CACNG3	6.71682	2.07411	0.0467998
COBL	25.1115	2.07346	9.90382e-07
SHC4	92.747	2.07341	2.55893e-14
BMP6	286.693	2.07076	3.61969e-17
GHR	39.6777	2.06945	1.58116e-08
CSNK2A3	12.6944	2.06937	0.0133577
MYH13	7.05722	2.06879	0.00751707
AC010327.4	19.7505	2.06823	0.00106501
WDFY4	28.3648	2.06751	0.00469552
KCNE3	74.4886	2.06674	3.07836e-06
SLC16A12	9.18504	2.06635	0.0155512
AC073072.1	5.52471	2.06604	0.0407249
OTOA	11.5203	2.06237	0.0119101
AC090358.1	11.9919	2.06197	0.00123252
AL591926.5	6.90549	2.06076	0.016397
ASNS	14006.9	2.05928	2.47136e-17
TMEM273	14.0144	2.05721	0.00129316
C8orf34	8.26641	2.05585	0.00107422
DPP6	11.996	2.05147	0.0169895
CES1P2	28.2343	2.05133	3.83868e-05
PDGFA	1396.48	2.04873	2.93492e-49
PLP1	431.182	2.04749	8.23982e-20
ZC3H12B	78.8544	2.04713	3.71702e-11
AL132780.2	91.8079	2.0466	8.75596e-14
MYL4	57.4046	2.04129	1.34748e-08
PCOTH	24.6142	2.04072	7.70012e-08
LINC01474	31.7496	2.03975	2.24347e-08
AC010255.1	15.3231	2.03915	0.00268896
MYPN	979.769	2.03666	2.947e-28
NAMPTP1	291.598	2.03577	1.31813e-16
GALNT9	229.188	2.0337	4.79124e-17
AC126696.3	5.39105	2.03353	0.0254212
HLA-DRB1	80.2422	2.03312	1.81481e-08
PHOSPHO1	77.1519	2.03146	2.24659e-11
CPVL	3426.44	2.03008	1.20841e-57
AC007405.3	63.739	2.02772	5.34456e-10
SETDB2	563.561	2.02687	3.44971e-16
MYOF	15695.7	2.02564	7.55805e-60
ADGRD1	51.5038	2.02544	1.91803e-05
LY96	154.518	2.02298	1.50981e-17
ANKRD34C	8.91688	2.02239	0.0473045
AL121772.1	44.2697	2.01885	4.20204e-09
AC116407.1	18.5477	2.01784	0.000162828
LEMD1	11.0392	2.01774	0.000704283
FSTL3	2216.42	2.01589	4.67062e-30
MATN4	29.8506	2.01572	1.99692e-05
SNCB	14.5795	2.01203	0.00128631
CASC15	47.7763	2.01149	2.55861e-14
GFI1	39.2407	2.01146	4.68471e-06
MATN3	531.015	2.01115	9.0005e-46
CD68	753.459	2.01055	1.51194e-27
OR1F1	8.9987	2.00733	0.00121338
BEST1	300.967	2.00686	3.22126e-16
SLC16A10	46.3061	2.00446	3.89577e-08
RFTN2	36.0927	2.00204	0.000328804
CYP7B1	12.6644	2.00107	0.000114226
CHRD	56.1711	2.00071	4.23925e-08
TXNRD1	33083.7	2.00003	2.57862e-28
LINC02159	20.4952	1.99899	5.02248e-05
FBXO27	124.087	1.99774	4.29351e-11
ERN1	835.878	1.99747	4.7881e-13
SLC12A7	1143.96	1.99656	1.18558e-33
LINC02050	9.73009	1.99503	0.00328928
NLRP5	272.561	1.99102	3.16794e-20
AL391422.1	7.10207	1.98765	0.0443148
ANGPTL4	106.274	1.98683	0.000327517
DTNA	635.686	1.98663	3.19883e-49
OLFML1	58.5392	1.98648	0.000221223
PSG9	110.583	1.98324	0.000617009
AC008514.1	9.82279	1.9805	0.00880327
PSG11	67.8098	1.98022	0.0035358
MAFK	1886.64	1.97922	9.59389e-74
CD177	28.3491	1.97902	0.00884019
NR4A1	297.178	1.97856	6.93112e-41
SLC15A1	6.82763	1.97834	0.0229141
AC006970.2	5.93962	1.97828	0.0283859
EGR1	398.232	1.97626	0.00108329
ADGRG5	6.23754	1.97618	0.0472492
CCRL2	23.251	1.97428	2.9065e-05
FUOM	567.291	1.97385	2.12747e-39
AC010247.1	21.5196	1.97345	0.000376926
MIR616	10.471	1.97196	0.0065004
GABARAPL1	3444.55	1.9711	2.07635e-109
NAALAD2	21.6137	1.97084	7.04844e-05
LINC01933	13.4281	1.97082	0.0239607
NOCT	193.321	1.97058	4.35776e-30
GBA	4636.23	1.96953	1.12035e-49
RRAD	54.8246	1.96922	3.12912e-09
NOS1	28.2098	1.96784	1.6209e-06
ELFN1	408.29	1.96746	1.34129e-56
SLIT1	10.5033	1.96727	0.0388854
AC022509.3	15.6517	1.96699	0.000119175
CDR1	15.9678	1.96315	0.022827
SNX10	285.763	1.95971	1.79654e-15
LINC02057	19.3481	1.95663	0.00151339
GPR17	17.2273	1.95646	0.000254311
PANX2	146.588	1.95628	8.42136e-21
AC067852.1	11.1213	1.95449	0.0498067
LINC01085	12.7587	1.95276	0.000248728
MAGEB6	5.78263	1.95198	0.0385093
LSR	324.582	1.95028	1.48928e-26
AC005670.2	15.0789	1.95	0.00707821
FCRLA	42.3397	1.94944	6.24817e-12
GRIP1	17.4806	1.94943	0.00166158
AL158055.1	6.23657	1.94749	0.0283859
PRLR	20.2341	1.94676	0.00212278
DUX4L45	69.4394	1.94468	4.27823e-10
MYCT1	39.358	1.94339	4.07846e-05
NTF4	74.5461	1.9432	4.49529e-17
AC084880.1	9.55954	1.93982	0.005558
LINC01356	69.318	1.93741	4.33615e-11
MED12L	66.5414	1.93692	5.81821e-07
CYP2J2	18.0338	1.93635	0.00151339
C1orf127	6.66912	1.93447	0.023275
LINC02453	7.06465	1.93139	0.0144542
AC002480.1	40.6027	1.9291	1.93117e-09
USH1G	10.0531	1.9289	0.00135925
FGFR4	381.567	1.92858	1.08167e-16
FBXL7	181.702	1.92731	5.35057e-39
CCDC169	311.19	1.925	7.9921e-26
NAP1L6	10.7277	1.92321	0.00185631
SLC30A2	14.2998	1.9232	0.000278309
ENPEP	9.95992	1.92205	0.00531666
SLC25A30-AS1	7.297	1.92179	0.0112175
AC120036.1	20.4262	1.92012	2.46821e-06
MIR503	28.3776	1.91835	0.00148499
MTHFD2	8169.23	1.91797	2.29283e-22
SLC38A6	490.288	1.91797	4.39995e-59
RCAN1	3868.5	1.91656	3.4155e-49
HDAC9	214.499	1.91426	3.1662e-22
DNAJC6	116.134	1.91361	1.66207e-07
FAM49A	399.053	1.9132	4.0114e-51
AC108515.1	38.8566	1.91215	2.00202e-08
IGFL2-AS1	125.577	1.9099	4.24685e-13
PCDH1	2577.07	1.90887	1.16906e-22
CCL15-CCL14	48.8946	1.90341	0.00639491
CLCN5	680.082	1.90276	1.16726e-31
LINC02561	10.7771	1.90133	0.00529601
AC004877.1	19.2244	1.89843	0.00237815
MBL1P	30.1666	1.89836	1.24923e-06
RAB33A	27.1866	1.89523	1.56269e-05
AC131011.1	9.3337	1.89483	0.0024119
NALCN-AS1	10.7794	1.89399	0.000313805
MOGAT3	27.3878	1.88806	2.92559e-08
SAT1	2227.26	1.88421	3.90506e-66
SGTB	1244.17	1.88191	9.06531e-26
FIGN	438.451	1.88161	1.67431e-39
CXCL2	13.9046	1.88127	0.00669734
LINC01470	8.98934	1.88024	0.046968
CYFIP2	654.882	1.87877	1.00817e-14
FSTL4	52.655	1.87839	1.19182e-07
AL117335.1	26.9628	1.87675	1.7545e-05
AC017002.1	16.7628	1.87644	0.00192758
AC226118.1	19.5282	1.87575	9.90663e-05
DNAJB5	1661.63	1.87373	1.00725e-39
NIPAL4	209.045	1.87335	3.14546e-11
PVALB	24.0853	1.86783	0.000548378
ALMS1-IT1	18.7055	1.86734	8.2617e-05
LINC01602	20.3807	1.8668	9.63932e-05
MASP1	35.1612	1.86276	0.00201925
EEF1A2	5981.38	1.86018	4.03654e-55
KCNJ5	31.4014	1.85813	1.83344e-06
PLS3	10420.3	1.85672	1.60225e-98
LATS2	922.068	1.85623	2.4419e-64
AC005736.1	74.5968	1.85603	9.73355e-13
GPR160	34.9944	1.85317	6.22283e-07
SULT1A1	2597.78	1.85249	5.25726e-24
RGS9	137.352	1.85185	1.91403e-12
AC005291.1	6.33143	1.85173	0.0183413
AC003975.1	9.90685	1.84868	0.00118814
SSPN	336.988	1.84725	3.68946e-17
PPP1R1C	18.8154	1.84714	5.31556e-05
LINC00662	641.629	1.84609	1.74307e-10
AL590235.1	24.4058	1.84587	5.11269e-07
DMRTA1	131.897	1.84554	9.58318e-15
LRCH2	46.2956	1.84436	4.24574e-08
PLAC1	82.0856	1.84228	1.21377e-12
CSF3R	14.0933	1.84029	0.00117535
CACNG2	5.50064	1.84024	0.0375257
KRT8P33	61.6269	1.83944	6.90558e-14
PI3	17.9407	1.83792	0.0089196
AC110373.1	6.17223	1.83759	0.0199686
AL135905.1	19.5174	1.83684	1.68972e-05
SFRP5	9.33546	1.83647	0.00366545
FAT2	52.7698	1.83543	1.1017e-08
RAB3D	372.349	1.83402	3.46979e-26
HMGB1P31	7.56436	1.83107	0.0150953
ADAMTS9-AS2	15.9735	1.83101	0.00659731
MFSD2A	204.189	1.83012	4.46028e-32
DTX4	442.45	1.8289	2.84184e-19
SLC3A2	10651.3	1.82822	1.89093e-14
MGAT4A	18.1128	1.82567	0.0422661
GPRIN2	25.9536	1.82479	0.0244299
VGLL3	29.0057	1.82442	5.46215e-05
TRAM1L1	19.9143	1.8242	0.000116775
GOLGA4	1736.59	1.82079	1.28452e-07
IL6R-AS1	5.96798	1.82057	0.0145516
PSAT1	16232.4	1.81963	1.18181e-17
KAZN	2090.46	1.81956	6.02288e-90
SLCO1B3	13.2909	1.81935	0.0251287
MICE	40.4742	1.81898	2.64475e-12
MEIS3P2	55.2569	1.81766	4.73052e-11
MAGEL2	23.8992	1.81396	0.0251758
LINC02577	30.0478	1.81156	6.96732e-06
ITPR1-DT	36.3786	1.81094	4.70668e-08
NANOS3	11.0993	1.80345	0.00281176
TAT	5.78345	1.80077	0.0267105
ASAH1	3432.71	1.80069	2.90015e-74
RPL23AP49	10.9556	1.7978	0.00678848
AC099786.1	15.8747	1.79766	0.000198869
VLDLR	1352.48	1.7968	1.37813e-80
LAIR1	55.8696	1.79252	0.000653941
GADD45A	1177.96	1.79154	1.30354e-16
CCPG1	2140.27	1.79147	1.07844e-06
GPR137B	473.094	1.7909	4.93722e-50
METRNL	538.626	1.78922	3.0371e-32
IRF8	69.1721	1.78805	9.4447e-07
AL139002.1	119.784	1.78766	6.30752e-22
MYH14	1638.04	1.78575	8.97652e-73
AJ003147.2	8.56543	1.78476	0.0135068
MYO5B	212.805	1.78403	1.24556e-08
FPR2	56.2776	1.78207	3.00133e-12
AREG	9.79271	1.78189	0.0273206
B3GALT5	20.1189	1.78146	0.00770879
NLRP6	7.28325	1.78116	0.0109884
UCHL1	173.57	1.78071	1.30204e-13
LINC01436	88.9071	1.77584	2.62794e-15
ENPP4	104.077	1.77579	4.91365e-09
KCNK15	31.2411	1.77407	7.8782e-07
PIPOX	53.9548	1.77396	9.03545e-11
WWC1	602.145	1.77214	6.46344e-29
L3HYPDH	792.482	1.77146	3.85616e-80
SPHK1	935.08	1.77133	1.21859e-59
SLFN14	5.90244	1.77069	0.0404686
PIP5K1B	6.121	1.77016	0.0479971
CARD16	266.334	1.76963	1.13348e-33
SGK3	372.477	1.76955	1.78644e-24
GFPT1	3629.25	1.76935	1.893e-26
BACE2	2559.99	1.76832	5.57842e-46
BEX5	103.9	1.76455	5.45814e-15
GAREM1	159.127	1.76374	1.2125e-21
HTRA1	853.162	1.76359	1.18404e-29
PVR	6076.55	1.76357	3.96504e-27
SEMA3B	1213.28	1.76311	5.08265e-18
KCNH1	22.7283	1.76058	0.00176652
HSD17B14	7.847	1.75717	0.0348567
NA	26.0402	1.75434	2.47382e-05
FRG2C	27.1678	1.75423	0.0173714
NA	7.60937	1.75355	0.0200071
RGS5	1408.44	1.75095	1.42999e-06
PCK2	6290.65	1.74855	4.93849e-12
AC068580.4	32.7496	1.74704	0.00301878
LGALS8-AS1	15.2446	1.74679	0.00059488
FLNC	24286.4	1.74612	2.50633e-43
ICAM2	134.271	1.74426	2.72927e-17
CCN1	10596.6	1.74081	1.10732e-52
C1QTNF1-AS1	25.0661	1.73974	4.04432e-05
CD82	1265.27	1.73922	1.78365e-20
CAP2	1928.4	1.73627	2.48099e-73
KANK3	90.5775	1.73621	1.83977e-11
SCN4A	135.576	1.73557	7.43984e-07
FAM160A1	139.302	1.73424	1.04199e-07
HLA-F	512.074	1.73385	3.14927e-22
SMPDL3A	94.5771	1.73357	8.64884e-18
L3MBTL4	51.6462	1.73201	2.68905e-05
CACNA1I	43.8467	1.73164	2.7887e-06
NA	16.9656	1.73096	0.00281889
FGD4	160.979	1.73036	4.09694e-13
TMEM205	1463.33	1.7296	6.81227e-43
AL109809.1	7.54959	1.72926	0.0184573
AC018755.2	97.9463	1.72826	1.34803e-06
ARAP2	8.31475	1.72812	0.0224547
LINC01303	56.4215	1.72809	0.000906269
IFIT2	1178.03	1.72784	4.89265e-42
TMEM191A	42.5166	1.72182	2.57733e-08
TRIM16L	2552.38	1.7213	6.18716e-14
TGIF1	1706.31	1.72073	3.17591e-22
AC090409.1	76.0238	1.71875	3.99772e-11
LINC01606	42.6194	1.71852	0.000227761
USP18	291.19	1.71836	5.08452e-28
MSANTD3-TMEFF1	272.433	1.7172	2.03419e-08
HOMER3-AS1	17.9911	1.7166	0.000408156
AC009549.1	45.6124	1.71638	1.49801e-10
ARHGEF16	104.708	1.71499	1.06513e-13
SNORD63B	18.0784	1.71373	0.00155496
HDAC2-AS2	45.653	1.7127	4.55723e-05
ARSI	573.046	1.71242	3.78325e-17
PRKAA2	150.547	1.71174	1.23168e-13
BRI3	3521.08	1.71096	4.50084e-38
FUNDC2P2	18.7489	1.70934	0.00221793
TMEM117	26.693	1.70903	0.000209011
REN	21.6442	1.7083	0.0259588
CASP1	701.689	1.70823	1.90483e-23
ZFPM2-AS1	556.367	1.70793	1.35484e-16
SHMT2	14299.5	1.70432	2.92536e-17
CDH1	23.8792	1.70367	0.0289282
KCNK9	51.845	1.70326	2.75209e-08
AC016705.2	94.4219	1.70302	2.02578e-06
CTSD	13512	1.70163	9.72341e-44
GAPLINC	47.0293	1.69779	7.91713e-09
SLC7A5	18550.7	1.69758	3.05294e-07
IRX6	9.06108	1.69645	0.00690295
CCDC169-SOHLH2	38.9182	1.69371	0.000396998
SHANK1	153.55	1.69239	5.3507e-12
F11-AS1	217.363	1.69115	1.42664e-10
GPRIN3	52.6601	1.68871	1.28135e-05
FAM184B	43.0435	1.68819	1.43042e-08
PCDHA10	9.78125	1.68643	0.0228552
GCNT2	168.784	1.68638	4.68353e-25
SEMA6B	655.886	1.6847	2.53898e-19
MIR22HG	876.977	1.68455	1.0704e-90
HECW2	136.98	1.68453	6.64718e-05
PPM1K	858.448	1.68339	4.20413e-36
DRD1	26.4566	1.68337	0.000273271
DNAH6	35.7195	1.68282	0.000659586
CTSV	629.824	1.68243	2.56352e-37
ME1	734.961	1.68163	1.47426e-35
OSGIN2	858.462	1.68091	3.36215e-31
AL355338.1	755.422	1.68082	1.90163e-11
TENT5B	961.981	1.67918	3.31237e-26
ITGA1	11661.1	1.67798	4.70107e-42
CYP4V2	348.436	1.67515	1.81846e-14
KIRREL2	62.2289	1.67235	1.66054e-08
APOL2	2137.59	1.66956	1.37728e-116
LINC02525	15.8636	1.66888	0.00155745
LMOD3	34.8893	1.66882	2.65228e-05
WNT5B	481.159	1.66851	2.85895e-18
ERVH-1	8.80186	1.66711	0.0462024
WIPI1	1713.17	1.66697	1.74356e-55
AC144831.1	11.1202	1.66659	0.0152586
CTNS	1997.99	1.66623	2.17812e-44
P2RX4	1389.15	1.66571	6.85485e-60
EAF2	18.1113	1.66518	0.00179169
TINCR	80.4656	1.66498	1.38451e-07
DMKN	409.41	1.66426	1.54162e-27
AC002401.4	17.6067	1.66289	0.00530593
EREG	68.0951	1.66267	8.17899e-06
ABL2	2982.84	1.66187	1.20036e-54
AL359237.1	12.9359	1.66151	0.0039472
AC098487.1	25.414	1.66016	0.000430868
ARL4A	624.351	1.65866	4.30534e-32
IFIT3	1284.61	1.65616	1.47746e-44
SRSF12	22.6356	1.65597	0.0140619
CD70	205.656	1.65514	1.61089e-22
CFAP61	17.9428	1.65499	0.00558393
DPP4	73.6292	1.6549	2.77241e-10
AL121987.2	26.9348	1.65245	2.20437e-05
SQOR	301.236	1.65217	3.16465e-26
KREMEN2	296.503	1.65197	7.75114e-18
AC022730.4	11.6039	1.65061	0.00541087
BTNL9	31.8263	1.64949	9.49101e-05
AL139288.1	8.23676	1.64745	0.017917
AC010207.1	29.9864	1.64633	0.000964636
MELTF	431.33	1.64483	2.22405e-19
IGSF23	35.7386	1.64435	4.25463e-05
NEU1	2876.21	1.64426	6.9489e-25
ACKR3	110.635	1.64327	5.21941e-12
PKIB	7.99545	1.64298	0.0300291
LINC00243	39.0991	1.64275	1.55103e-05
GSTO1	3403.43	1.64263	3.95309e-52
MUC16	88.7545	1.64085	0.00492299
GABRR2	34.62	1.6402	0.00163483
DMGDH	358.566	1.63887	1.0518e-11
AL078590.3	45.5201	1.63871	2.66663e-07
AC024022.1	9.38759	1.63754	0.00768323
COL28A1	18.514	1.63733	0.00102418
CEBPG	1838.69	1.63504	4.45185e-10
AL035530.2	7.57046	1.63433	0.0297278
FLNB	29152.8	1.63423	1.32808e-35
CDKN2B	1954.88	1.63343	5.73275e-14
GJA3	323.616	1.6328	1.08573e-43
AC005479.1	7.73917	1.63024	0.0290354
SLC2A9	168.736	1.62785	1.25384e-23
NUP50-DT	172.524	1.62717	3.31677e-14
TBX15	27.2911	1.62616	0.00284036
AC010547.4	58.1647	1.62456	0.00130973
MYADM	3260.6	1.62278	7.29058e-47
AL353751.1	231.712	1.62037	2.44725e-11
ZMYND12	26.0948	1.62036	0.00214673
GNAL	206.462	1.62031	2.3131e-24
SPINT1	91.074	1.61975	9.83577e-08
IL3RA	225.991	1.61969	8.11351e-23
IER3	2184.94	1.61878	1.32378e-37
PNMA8B	17.9585	1.61866	0.0202567
GABRA2	53.377	1.61782	2.76508e-05
WWC2-AS2	13.9877	1.61747	0.00352825
ZP1	57.8803	1.61537	0.0100826
TMED10P2	29.8009	1.61464	1.22625e-05
AP002884.1	752.76	1.61342	2.37876e-32
AC068580.1	7.56903	1.61305	0.0212043
NLRP12	80.4694	1.61276	9.74634e-06
SIGLEC5	138.352	1.61232	7.22813e-19
SVEP1	143.212	1.61192	1.89173e-07
CEACAMP7	24.5102	1.61186	0.0405618
SLFN5	2817.63	1.61123	1.87858e-21
LINC00869	134.113	1.60951	7.07248e-05
ATP6V1C1	2317.99	1.60867	1.84089e-28
TSPAN1	25.1807	1.60851	0.00011379
MTFR2	416.478	1.60796	1.18556e-27
ADAMTS1	240.342	1.60788	8.20077e-09
TMEM156	66.5852	1.60788	0.000763796
TSKS	10.5557	1.60694	0.0283859
IFI44L	45.5989	1.6062	0.0221987
STX3	2995.09	1.60613	1.05258e-72
HSD11B1-AS1	25.9119	1.60591	0.00094041
IDH1	9760.19	1.60559	6.9448e-41
ITGB1-DT	24.6401	1.60559	0.000199415
AC005540.1	17.4025	1.60468	0.0158961
OPTN	3436.81	1.60259	1.4836e-65
PRSS50	13.044	1.60247	0.00406958
THBS1	3896.64	1.60246	5.64314e-46
FAM215A	50.517	1.60113	5.34913e-05
MYL3	32.8079	1.60076	0.000573085
HLA-DPA1	429.194	1.60072	4.62884e-11
SLC16A11	75.8206	1.59948	1.09472e-12
SYDE2	235.87	1.59824	1.14848e-11
RNF6	714.398	1.59282	1.43009e-07
TMEM179	21.2982	1.59253	0.00156504
CLIP1	2506.61	1.59244	1.74835e-17
ACTN3	14.1995	1.59148	0.00629895
IGF2R	12286.6	1.59005	6.68917e-45
ARHGEF10	3349.75	1.58911	1.15247e-53
ALPK2	2595.84	1.58586	4.62305e-12
MRAS	1665.82	1.58333	6.56425e-50
ELFN2	490.724	1.58264	1.7013e-12
AC121757.1	28.9494	1.58232	0.00679482
ST6GALNAC3	127.248	1.58208	3.77428e-06
TSHZ3	74.6706	1.58176	4.55416e-07
AP001596.1	20.3971	1.58173	0.00049021
SPANXA1	416.049	1.58083	1.66886e-14
NUDT16P1	19.5589	1.57969	0.000462095
MAGEA4	9.33668	1.57907	0.03633
AC025580.2	19.2052	1.57704	0.00876431
LONRF1	546.423	1.57682	2.93266e-28
SLC19A3	219.396	1.57639	1.34676e-31
LRRC37A7P	23.7923	1.57602	3.65707e-05
SAMD4A	2581.58	1.57395	2.48301e-36
IL2RG	101.376	1.5739	9.6568e-09
AC007068.1	23.2926	1.57231	0.000608245
AL513165.2	33.6387	1.57224	0.00448456
AC012158.1	8.16769	1.57169	0.0351303
SAT2	1759.28	1.57165	1.90572e-34
FAM241B	259.338	1.57144	1.14091e-16
MAPK13	160.047	1.57092	8.67655e-18
FAM27B	30.5265	1.57073	2.93053e-06
RNF122	196.355	1.57037	3.86987e-19
SMCO4	160.016	1.57004	6.54541e-08
NOC2LP1	35.0137	1.56756	0.000427889
HEPH	29.3464	1.56746	0.00187301
AC243830.2	13.7508	1.56567	0.010358
LINC01354	15.6085	1.56567	0.00500795
AC083862.2	85.2515	1.56504	4.83461e-14
SLC39A14	6805.43	1.56491	1.55075e-45
AC105411.1	36.1041	1.56381	0.00665905
POSTN	840.519	1.56316	3.77239e-05
EPM2A	231.773	1.56247	2.45191e-33
FAM155B	469.104	1.56237	1.29065e-41
FMN2	287.733	1.56154	4.05678e-09
RTN4	17887.3	1.56085	6.79981e-56
VXN	179.482	1.56034	3.3238e-13
CTSL	7027.92	1.55993	4.24237e-196
MSRB3	1780.2	1.55656	3.11367e-42
FTL	97215.4	1.55602	1.99982e-31
AC023906.5	19.0193	1.55543	0.00166042
CCL5	161.925	1.55405	4.17864e-08
AL590666.2	45.6317	1.55387	4.00718e-06
RFTN1	2508.13	1.55342	1.39965e-45
PEA15	12565.6	1.55264	3.2884e-32
TPK1	102.279	1.55206	4.63875e-11
CLCNKB	120.262	1.55174	7.0971e-12
TCAF2P1	28.1711	1.55171	0.00453156
AC104435.2	31.5696	1.55155	2.80625e-05
ITGAX	188.976	1.55129	6.94636e-17
IL23R	9.82723	1.54779	0.020909
KRT8P12	423.088	1.54766	2.8433e-47
CEACAM21	17.2681	1.54746	0.00150706
ASPA	207.172	1.54686	1.53538e-25
EDEM1	2254.97	1.54555	1.15984e-53
PKP1	27.4733	1.54502	0.000115497
NA	13.1429	1.5423	0.0467358
AC139149.1	11.9241	1.54034	0.030884
CYSTM1	1163.56	1.53965	1.32808e-35
MTX1P1	58.6494	1.53886	1.15785e-07
LYST	1092.09	1.53656	1.81414e-14
SORL1	4958.87	1.53633	1.21856e-34
RND1	94.31	1.5354	3.76498e-08
FOXD3	10.6184	1.53539	0.00908521
C4orf54	44.1001	1.53439	8.92503e-07
CDH15	192.406	1.53436	9.73161e-12
XPOT	9329.97	1.53352	1.09127e-19
SUGT1P1	47.6038	1.53229	1.94282e-06
NXPH4	627.438	1.53211	1.62997e-22
CES4A	56.3291	1.53164	4.21799e-08
MPP7	42.7413	1.53148	3.27923e-05
MIR181A2HG	24.1637	1.53087	0.000187521
AC012512.1	28.8738	1.52971	9.01461e-05
NXN	1791.1	1.52729	1.99838e-37
KIF1A	33.0877	1.52689	0.00336528
TUFT1	886.636	1.52681	3.44982e-37
AL160191.3	10.7349	1.52605	0.0174735
PLXNC1	412.218	1.52599	6.20046e-16
MCOLN2	40.1345	1.525	0.00069898
CLTB	1764.88	1.52466	9.33059e-59
MIXL1	18.8216	1.52359	0.00142369
PROSER2-AS1	38.0848	1.52186	0.00245319
FOS	91.3384	1.52164	0.00034901
BMP7	617.239	1.52096	7.39011e-11
ALS2CL	852.731	1.51958	6.57845e-18
GLP2R	415.364	1.51889	5.99885e-07
NPTX2	1549.75	1.51879	5.78809e-19
TFE3	7339.4	1.51693	9.93068e-65
AL161908.1	16.6827	1.5154	0.0144964
TMEM140	1535.96	1.51506	4.23697e-47
WHAMM	724.845	1.51438	2.74764e-31
LAMP2	7955.9	1.5124	9.54953e-87
RHCE	20.1289	1.51204	0.00336349
JPH2	828.929	1.51178	9.15705e-18
SESN2	1594.17	1.50966	3.80872e-08
TDRKH-AS1	27.6724	1.50877	0.00485145
UNC5B	2009.28	1.50588	9.86859e-06
OSTM1	1362.32	1.50547	7.49433e-27
GOLT1A	20.8545	1.50471	0.00339708
FTH1P8	14.9143	1.50332	0.0264027
MIR4482	11.9733	1.50214	0.00524747
HSPA9	36794.3	1.50169	4.27202e-20
GPR135	106.011	1.50083	5.56201e-11
FOXE1	349.402	1.4999	4.76879e-16
IMMP2L	342.122	1.49932	1.02823e-20
SQSTM1	11897.9	1.49848	6.28247e-32
FICD	254.436	1.49844	4.45304e-23
KCNQ3	69.3694	1.49813	0.00500086
SLC46A3	306.615	1.49806	2.94071e-22
ZDHHC11B	68.9512	1.49722	3.5657e-07
LINC00513	40.8228	1.49707	2.83351e-05
PIM1	1122.78	1.49618	1.91932e-13
NOXA1	57.9164	1.4954	4.16478e-06
ARHGAP42	723.866	1.49485	5.66555e-22
CCSER2	913.799	1.49456	8.30033e-18
GLRX2	325.843	1.49436	2.69514e-18
GRHL1	65.0641	1.49376	2.81838e-06
AC009055.2	28.2434	1.49159	0.00821724
ADGRG6	2889.84	1.49105	2.02127e-19
PRKCE	1501.61	1.48731	1.0811e-12
PRRG4	102.502	1.48607	7.66441e-10
NKX2-2	22.5441	1.48503	0.000579071
FTCDNL1	96.1717	1.48394	1.01221e-10
RIPK2	724.473	1.4826	3.1312e-31
ATP6V1B1-AS1	56.9122	1.48196	4.19111e-06
EPHX1	3232.59	1.48103	5.33864e-42
IL23A	13.001	1.47903	0.00492299
FAS	239.257	1.47889	1.71758e-12
AL590644.1	26.0394	1.47708	0.0135031
HLA-DMA	431.207	1.47596	7.40048e-10
GAL3ST2	8.13558	1.47498	0.0498685
CERS1	358.848	1.47488	4.63205e-06
SUSD5	41.3147	1.47084	5.15636e-07
AL365181.3	171.315	1.46968	9.71787e-08
KRT81	3638.58	1.46906	4.68238e-08
MRAP2	60.1976	1.46704	1.47021e-05
SLC35F6	2445.05	1.46672	8.70964e-15
AC138356.1	14.467	1.46635	0.000828291
TNFSF4	327.521	1.46607	9.15155e-08
BCL6	700.865	1.46538	1.23471e-45
SCN1B	334.46	1.46449	1.08187e-13
ADGRD1-AS1	12.5999	1.46402	0.00365681
PXDC1	1898.91	1.464	5.78252e-60
AL139260.1	63.3293	1.46311	4.29635e-08
CATSPERG	35.3177	1.46235	0.000177044
FMOD	1627.64	1.46218	2.11955e-16
UNC13D	102.386	1.46204	4.76974e-05
AC096637.2	78.231	1.45961	3.21922e-12
NEDD4L	4687.22	1.45806	1.11416e-51
AC025857.2	32.6433	1.45712	0.000278566
LSMEM1	38.3777	1.45693	0.0023719
CACNA1H	127.756	1.4564	2.37215e-06
AOX1	235.061	1.4562	0.000278739
SLC52A1	10.204	1.45608	0.0152129
PTCH1	1620.68	1.45509	1.32939e-18
AL049650.1	34.4112	1.45486	0.00148741
NA	52.269	1.45401	3.91961e-07
SEMA4A	163.42	1.45352	3.32685e-09
AC087651.1	9.61209	1.45126	0.0410244
C1orf61	30.0035	1.4505	6.97421e-05
STOM	8123.48	1.45016	5.03691e-90
NSUN7	276.916	1.45006	2.56494e-15
TMEM192	1449.13	1.44831	9.76196e-31
SLPI	49.8873	1.4481	0.000104249
EIF2S2	12053.6	1.44788	1.09903e-25
HEYL	117.759	1.44606	9.34439e-05
HHLA1	19.1567	1.44512	0.00825368
AL136084.3	71.2729	1.44486	0.000892702
RNF41	3274.28	1.44473	2.65072e-17
IL7R	8419.82	1.44402	7.51208e-06
MAP7	29.0566	1.44358	2.55939e-05
ACE2	59.3241	1.44308	7.89679e-05
SLC25A18	63.981	1.44071	2.00672e-06
C4BPB	51.0916	1.44029	0.0349259
ITPR1	1284.63	1.44007	4.60871e-16
AC147067.1	13.411	1.43916	0.014399
CDC37P1	25.5842	1.43793	0.000581471
AC093616.1	454.26	1.43447	4.33361e-18
PRELID3A	164.032	1.43318	2.40289e-10
KIF5C	131.452	1.43294	6.42521e-06
ARLNC1	37.4712	1.43289	0.000454561
SDK2	192.647	1.43054	5.51792e-05
ANO6	6166.89	1.43025	1.02942e-51
FAM189A2	29.5952	1.42919	0.00300178
SPART	2174.27	1.42872	2.66103e-54
WWC2	2643.32	1.42863	6.26501e-16
SRRM4	9.31714	1.42832	0.0129855
PNCK	57.1084	1.42786	0.00479673
CSF2RB	37.9642	1.42785	0.00359149
TMEM191C	53.9072	1.42409	0.000778348
KDSR	2931.96	1.42328	3.62443e-69
UFM1	957.922	1.4223	1.2834e-18
SLC4A10	10.0554	1.42203	0.0387059
SLC52A3	59.3542	1.4219	5.34796e-05
SLC5A5	18.7602	1.42161	0.0183853
DCSTAMP	13.8941	1.42147	0.0499757
LINC01088	28.8128	1.41976	0.000109457
AL354740.1	98.7082	1.41947	0.000286576
RPS6P8	16.7239	1.41827	0.00830669
FCMR	73.1085	1.41782	9.59348e-06
AC104123.1	9.22245	1.41759	0.0405618
AC010307.2	7.62733	1.41689	0.0315896
SYBU	311.966	1.4161	1.87244e-07
LHFPL6	422.631	1.41586	1.91452e-22
CHN2	294.589	1.41573	1.04528e-32
CAMSAP3	101.49	1.41449	3.19662e-06
RBM24	126.653	1.41408	1.74071e-05
AC092287.1	8.38461	1.41315	0.029482
PAGE4	12.6974	1.41215	0.0148732
LONP1	5588.88	1.41212	1.66348e-46
LINC02582	131.149	1.41018	5.76407e-09
LAYN	609.028	1.40903	6.31175e-18
LINC02551	15.8048	1.40892	0.0238084
SYNPO	2426.23	1.40845	5.62971e-35
RAB3IP	248.084	1.40662	3.30202e-09
VAT1	16525.2	1.40651	6.14582e-28
ZNF385D-AS1	17.7548	1.40594	0.0035604
MIR646HG	21.7239	1.40525	0.00639038
AC245100.1	8.80247	1.40504	0.0387263
OR2A1-AS1	214.818	1.40407	3.27975e-16
LMCD1-AS1	48.7429	1.40381	1.21477e-06
ABRACL	559.206	1.40226	9.37686e-27
GARS	17460.1	1.40185	2.56349e-16
DNAH14	338.848	1.40004	1.50898e-13
AC108463.2	15.8197	1.39996	0.0167396
MCF2L	207.916	1.39957	3.08022e-05
MNX1-AS1	32.2636	1.39919	0.000115549
SERPINB8	817.262	1.39801	2.4549e-10
SLC1A6	42.1192	1.3962	0.000143363
PLEKHF2	603.111	1.39583	1.57277e-17
AL445490.1	16.2243	1.39465	0.00602528
CSMD1	132.147	1.39385	0.00758851
MYT1	13.7928	1.39365	0.0290354
NECAB2	101.487	1.39188	1.21091e-06
CHST3	1381.8	1.39187	9.41864e-41
AL450345.1	18.1113	1.39021	0.000736751
FTH1	76509.7	1.38821	4.67085e-30
F2RL2	2246.08	1.38759	4.09645e-33
TPSB2	9.62624	1.3862	0.0324256
PLA2R1	868.558	1.38533	4.49832e-24
PRAP1	135.336	1.38503	0.000103441
LYN	763.426	1.38392	4.87376e-26
AL391422.4	577.933	1.38389	2.72661e-10
HEXB	16325.6	1.38376	4.71773e-54
NA	98.5649	1.38328	9.30599e-13
PYY	26.7272	1.38312	0.000420237
AC010719.1	42.8172	1.38228	5.28101e-05
CDS1	52.3163	1.38221	0.00301713
NA	141.356	1.38181	6.62173e-05
CYTOR	2035.6	1.38139	3.13466e-39
LY6E-DT	189.854	1.38105	8.97793e-16
HLA-V	43.9351	1.38071	0.00289883
EYA4	172.56	1.37978	2.92201e-05
GALNT16	52.8199	1.37918	0.000145137
TMEM138	2071.52	1.37855	7.27698e-61
APOBR	38.0967	1.3758	5.25321e-06
AL162171.1	1232.53	1.37575	3.73466e-47
SPOCK1	3684.5	1.37556	6.57633e-46
STAC	1317.9	1.37419	7.49466e-16
LGALS8	2152.32	1.37391	4.98957e-46
ADGRG3	68.617	1.37226	2.20758e-08
PQLC2L	60.0041	1.37068	4.55708e-09
ADH5	8305.9	1.36942	1.80909e-71
SLC8A3	826.265	1.3694	2.11955e-16
BACH1-IT1	12.987	1.36922	0.0231555
MIR503HG	2154.71	1.3692	3.3276e-09
AC078925.4	12.1873	1.36914	0.0151425
CHST15	1086.67	1.36842	5.32326e-34
TMEM86A	534.217	1.36794	2.96054e-13
GPD1	24.6735	1.36733	0.00109557
C4orf19	21.1647	1.36648	0.00568228
AL645939.2	14.4013	1.3644	0.0269051
MAN1C1	266.164	1.36223	8.60653e-10
GATM	9.70851	1.36161	0.0225458
MAOA	392.479	1.36155	1.11965e-09
PFKFB2	1199.13	1.3615	6.02517e-30
LINC02298	64.2872	1.36127	1.98548e-07
ITGBL1	61.5858	1.36026	0.00144724
AVPI1	366.804	1.35943	1.7189e-19
ARHGAP20	387.95	1.35925	1.79359e-11
TGFB2-AS1	227.616	1.35917	7.95558e-11
DDR2	12220.9	1.35899	4.43078e-16
SMTNL1	45.5235	1.35858	5.53049e-05
EPOR	858.341	1.35845	1.68351e-26
NFE2L1	19179.8	1.35468	1.10152e-46
SMOC2	58.3939	1.35251	0.00456647
IFIH1	381.169	1.35247	1.3674e-12
MXRA7	5655.55	1.35178	4.784e-35
AL031058.1	21.8809	1.35153	0.00586784
B4GALNT3	353.394	1.3504	2.72551e-22
MAP1LC3B	6359.45	1.35029	6.12689e-41
GCLM	1084.26	1.34959	6.11799e-17
MIR4435-2HG	2097.29	1.34909	2.65298e-41
AL121904.1	28.5262	1.34731	0.00248629
AC026436.1	24.5464	1.34682	0.00300416
DHRS11	725.245	1.34642	1.07616e-46
ITGB2	124.991	1.34529	0.000251499
CTNNA1	21483.2	1.34503	7.31659e-97
AC011591.1	33.094	1.34493	0.0183695
AC097059.2	16.2489	1.34484	0.0304011
ACAP1	278.112	1.34433	8.03362e-11
NA	158.673	1.34383	6.29624e-18
AC068580.3	46.4909	1.34212	2.54808e-05
NXF3	122.373	1.3404	4.97249e-05
PAG1	564.516	1.33861	5.51396e-11
ABCC4	5268.94	1.33737	1.33357e-58
MICB	1091.3	1.33732	2.1733e-12
TPM1	23789.7	1.33658	1.10364e-35
EIF2S2P4	29.8036	1.33639	0.0161408
SLC2A4	550.399	1.33632	4.16036e-17
MARVELD3	105.416	1.33582	2.9372e-10
CYREN	3033.6	1.33307	4.40046e-18
WBP2	3411.36	1.33279	5.63547e-37
FAM45A	1390.91	1.33205	1.14756e-52
KIAA1210	25.7086	1.33144	0.00443292
SLC6A20	25.269	1.32907	0.0190843
AC011511.5	30.7998	1.32857	0.000180822
IRAK4	600.655	1.32687	1.41534e-22
AC112220.2	53.0907	1.32641	3.07868e-07
NA	149.01	1.32521	1.87635e-10
ATP1A2	143.773	1.32407	0.00357481
NEXN	357.851	1.32366	1.37477e-13
HTATSF1P2	155.78	1.32262	7.0409e-12
THNSL2	53.5911	1.32254	0.000251298
KLF8	39.9765	1.32219	1.81508e-05
FUT1	131.454	1.32135	0.000132073
C3orf20	24.4149	1.32101	0.0127047
PTP4A1	2535.04	1.32049	1.49655e-06
EFCAB5	26.2029	1.32042	0.00559089
GALNT5	69.6934	1.32017	2.11614e-05
AL158825.2	9.6129	1.31855	0.0408271
DSEL	19.9727	1.31837	0.00464456
ATP6V1E1	4139.27	1.31752	1.77929e-91
MUC3A	74.0758	1.31745	0.0113905
CEBPB	1453.56	1.31708	4.557e-08
WDSUB1	397.793	1.31671	4.05673e-29
SORT1	7230.54	1.31621	1.26517e-44
ABCC9	49.8624	1.3161	0.00110436
ARHGDIG	19.8327	1.31569	0.0126648
KCNQ4	29.9361	1.3153	9.82335e-05
MORN3	30.7254	1.31498	2.84227e-05
NATD1	1387.9	1.31488	5.63516e-22
AF196972.1	16.5354	1.31479	0.00682673
CERNA1	67.9505	1.31414	2.23167e-07
NR1D2	2187.67	1.31387	1.20545e-12
TRIM37	2440.2	1.31287	3.759e-39
HS6ST2	758.522	1.31047	8.64884e-18
LACTB2	789.837	1.30978	1.72153e-29
INAVA	330.591	1.30861	3.57052e-12
CEBPD	169.019	1.30808	6.91856e-10
KLHL29	1265.21	1.30755	1.72852e-18
COL15A1	15563.9	1.30743	1.15069e-07
AL161772.1	38.9717	1.30621	9.58546e-05
ANXA1	9614.09	1.30462	7.62458e-10
PIGY	36.6523	1.30443	0.0267195
AC010186.2	280.351	1.30363	8.24174e-15
SLC30A1	650.687	1.30354	8.95482e-10
DUSP5	787.259	1.30294	2.79513e-10
TLR1	15.8981	1.30262	0.0355503
CHMP2B	883.199	1.30203	3.32263e-31
CHP2	31.807	1.30165	6.47855e-05
HIST1H2BN	83.965	1.30156	1.30627e-06
C1R	3793.03	1.30136	2.00844e-17
AC010601.1	55.1462	1.30127	1.0739e-06
P4HA2	4210.48	1.30079	4.18454e-39
MSANTD3	2120.17	1.29951	9.94236e-46
ZBTB47	508.256	1.29874	8.67899e-15
KCNE4	2965.93	1.29765	1.23584e-23
PLAU	3831.11	1.2943	1.06471e-16
SPANXB1	1009.09	1.29422	4.90445e-23
USP54	1239.21	1.29417	1.01543e-43
LYPLAL1	519.198	1.29407	3.8247e-24
ARSG	201.147	1.29349	3.24172e-14
P4HA1	2000.93	1.29296	6.29761e-35
GAD1	53.2255	1.29278	1.31123e-05
HLA-L	166.764	1.29219	1.458e-06
CDC42EP1	3906.3	1.29127	2.02164e-12
AARS	23738.4	1.29096	1.31706e-15
C20orf202	13.627	1.2909	0.0224973
FLJ45513	22.0443	1.29034	0.0199686
METTL21A	721.63	1.28778	4.79715e-28
RSPO4	543.324	1.28775	1.30033e-27
PLEKHF1	202.827	1.28689	6.00795e-05
KIAA1324	83.1375	1.28658	7.70796e-05
ZNF469	430.187	1.28629	4.48506e-11
RRAS2	2136.44	1.28594	2.99872e-41
RAI14	6837	1.28486	1.89855e-14
PCNX4	3959.15	1.2838	2.00261e-20
ECHDC1	1506.61	1.28367	1.37298e-13
UBE2J1	3574.24	1.28335	1.14438e-66
GPM6A	20.4524	1.28248	0.0259588
ZMAT1	38.3723	1.2823	0.00169003
C16orf71	39.2262	1.28216	0.000191826
ADAMTS16	718.058	1.28177	1.09202e-07
AC006252.1	66.2063	1.28164	5.24307e-05
AGAP11	44.8673	1.27995	0.000175839
FOXD3-AS1	24.5755	1.27937	0.0035282
SERPINH1	45395.9	1.27868	4.89957e-53
TMEM74B	138.17	1.27845	0.000111461
P2RY6	13.9139	1.27807	0.033226
TUBE1	792.608	1.27727	3.43846e-08
HSPA5	56281.2	1.27725	9.43457e-27
NMRK1	236.402	1.27624	5.007e-17
CCL26	75.1511	1.27623	9.36967e-05
ECM2	30.1714	1.2755	0.00231742
TMEFF1	177.292	1.27445	0.000313958
PLCG2	1243.88	1.27258	5.45165e-17
AL139352.1	15.4139	1.27204	0.0333065
CCDC9B	1980.08	1.27071	2.12965e-17
IQANK1	28.1149	1.27065	0.0283048
GRN	14788.1	1.2699	1.45218e-17
SH3RF2	238.264	1.26928	1.16495e-10
FTH1P2	16.424	1.26835	0.0363512
PRSS3	32.7351	1.26797	0.00117676
NOTCH3	3538.21	1.26782	8.45335e-14
LTF	52.0711	1.26773	0.0198073
RBM20	491.849	1.2673	1.89358e-13
ITGA3	22276.6	1.26641	6.48105e-35
SNAPC1	2436.41	1.26625	1.55192e-09
PSD2	18.5588	1.26624	0.0124478
NPC1	3213.85	1.26608	4.86692e-44
CNST	892.614	1.26537	6.76739e-18
FRRS1	170.666	1.26476	2.54047e-05
C12orf66	315.731	1.26474	8.77541e-20
DUSP3	4615.69	1.26462	3.90261e-48
LDLRAD4	335.451	1.26456	9.95629e-16
NA	12.0417	1.26433	0.0461197
C2	638.284	1.26385	1.43788e-06
EXOC3L4	86.6363	1.26196	1.01755e-10
ZEB2	1231.24	1.26163	1.22834e-10
LINC01666	39.0663	1.26159	3.15472e-05
UPK1A	68.1822	1.26055	0.00122359
TNFRSF10B	5148.8	1.25991	1.84615e-27
CU633904.1	124.737	1.25935	0.0103485
TMEM178B	177.537	1.2584	0.00151958
EFR3B	66.2786	1.25828	7.9568e-05
PAQR5	477.013	1.25564	5.20711e-10
FMN1	253.487	1.25558	1.16083e-05
SDC1	3446.92	1.25452	4.23757e-21
ENO2	1006.58	1.25435	1.95037e-08
ENPP7	27.3522	1.25372	0.00103394
GEM	363.987	1.25368	1.24112e-09
ZFAND3	4293.1	1.25108	1.19964e-19
LINC00261	28.2626	1.25041	0.00522606
ZNF711	258.94	1.2504	3.1677e-05
AC092645.1	38.5495	1.24812	0.0221965
CLEC11A	1129.02	1.24801	1.60379e-14
RELB	233.185	1.24687	2.00999e-05
AL450124.1	315.592	1.24632	3.46321e-22
TEAD4	1502.04	1.24599	1.02399e-35
DNASE2	2894.14	1.2457	1.19043e-17
RAG1	104.395	1.24552	6.78581e-07
CDC37P2	28.6526	1.24497	0.00938834
CPEB1-AS1	15.478	1.24402	0.0422804
LINC02289	34.7172	1.24376	0.00281161
FAM83H	345.193	1.2436	6.1612e-23
SBF2-AS1	216.803	1.24272	8.56097e-09
HOXA1	545.361	1.24266	1.85488e-30
EDNRA	37.0298	1.24258	0.0370001
AC010618.4	100.578	1.24089	1.21544e-05
FGF13	17.179	1.23983	0.0105655
NA	32.9901	1.23947	0.00291259
MGST1	2201.14	1.23884	1.54943e-37
CES3	106.624	1.23879	4.0642e-06
SMIM3	518.837	1.23848	1.56763e-20
OSMR	15770.7	1.23781	1.92483e-25
AC022784.1	65.506	1.23691	0.000199118
SLC7A7	165.695	1.23555	2.806e-08
LINC02438	24.0906	1.23437	0.00305604
FAM27C	79.2934	1.23362	1.19889e-08
AC020934.1	20.7445	1.23205	0.032315
TP53I11	1725.49	1.23145	7.94577e-30
MBNL2	5478.88	1.23143	3.15666e-09
LINC01611	16.0922	1.23139	0.0187166
IPMK	190.096	1.23123	3.71235e-09
IL1RAP	613.133	1.23035	2.59378e-14
SOHLH2	153.563	1.22922	3.28193e-09
ESRG	287.451	1.22863	3.64932e-09
VTN	154.851	1.228	0.000147072
CALHM6	28.5683	1.22765	0.00440284
FAM171B	279.169	1.22731	9.22597e-05
BNC1	1562.45	1.22649	4.96868e-09
TDH	10.9016	1.22626	0.0237617
ZNF280A	323.186	1.22623	6.75814e-15
CCL28	830.908	1.22619	4.95437e-30
FTSJ1	3401.26	1.22576	3.23154e-59
ASTN1	2110.21	1.22575	2.04139e-22
IARS	24186.3	1.22573	1.22754e-20
SLC1A4	2242.25	1.22476	1.70836e-07
NCK1-DT	221.619	1.22404	1.00669e-21
NA	19.1329	1.2232	0.0100434
LINC01278	1055.17	1.22185	3.64369e-54
MIA2	1072.72	1.22156	1.4305e-10
TLR2	80.4084	1.22065	4.25584e-05
DNAJC3	5598.11	1.22042	3.40933e-42
ADAMTSL3	34.0924	1.21996	0.00691784
FAM43A	796.789	1.21922	2.01897e-27
APBA1	534.11	1.21882	2.06137e-11
IGFBPL1	580.178	1.21846	6.5279e-21
CTBS	682.399	1.2176	7.43942e-36
HK2	2102.95	1.21704	2.9033e-18
CACNG6	238.432	1.21628	4.89426e-09
COQ10B	657.958	1.21433	1.71808e-25
RNY3P8	37.8413	1.21432	0.000330424
PLCE1	1326.09	1.21347	4.37577e-27
CCT6B	86.7909	1.21247	8.89769e-09
ONECUT2	116.838	1.21244	0.0307474
SH2D5	415.685	1.21237	4.52282e-20
TRBV20-1	248.893	1.21231	3.04898e-14
RHOQ	3625.3	1.21219	2.18098e-71
AC068987.4	22.1631	1.21218	0.00638013
LRG1	182.225	1.21122	6.91125e-05
MYCBP2	9079.7	1.21011	5.0311e-20
RB1CC1	3116.4	1.21007	5.98565e-06
PIK3CG	245.038	1.20984	1.71808e-25
SYNE1	3339.58	1.20796	6.87235e-10
KCNH5	165.528	1.20769	1.97434e-07
AC009502.1	25.574	1.20691	0.0412561
HAR1A	46.3807	1.20605	0.00110939
FADS3	3833.39	1.2059	6.32375e-34
C11orf74	508.028	1.20587	1.18009e-12
SORBS2	136.345	1.20525	0.00011422
NA	43.531	1.20493	0.000949467
IGSF1	60.0827	1.20466	2.28162e-05
STEAP1	213.082	1.20444	4.61156e-11
KLHL5	3640.73	1.20437	2.32001e-16
CTSB	51746.6	1.20431	5.75639e-21
CPEB2	156.456	1.20361	0.00031385
CD79B	132.19	1.20355	1.69054e-09
SARS	9946.6	1.20335	1.34178e-16
RNF187	6542.36	1.20316	1.55328e-31
CYS1	92.6595	1.20278	1.73823e-07
PGM3	2990.49	1.2013	6.24598e-20
SVIP	315.925	1.20028	1.4236e-11
UPK1A-AS1	54.354	1.20017	0.0109433
RBM47	230.515	1.20014	4.45616e-14
MOCOS	902.934	1.19971	1.16404e-06
SLC2A13	99.1851	1.19962	4.1232e-08
THAP9-AS1	1053.72	1.19962	4.56253e-07
ISPD	52.7847	1.19764	5.79169e-06
TMEM266	66.7393	1.19698	1.55568e-06
NA	29.326	1.19669	0.01535
FAM91A1	3131.37	1.19566	8.68182e-11
PRDM5	571.608	1.19563	3.21087e-19
BEX4	216.33	1.19507	9.19097e-14
PHYH	939.277	1.19467	2.52549e-51
LINC02256	15.4711	1.1934	0.0446485
NUDT18	423.8	1.19328	4.16459e-12
LINC01275	38.0356	1.1931	0.000598739
ARHGEF26	403.731	1.19224	3.04898e-14
CD72	28.971	1.19191	0.0151932
TACC1	7595.8	1.19037	4.05381e-28
CTSC	4818.8	1.19008	3.16866e-22
AC008686.1	60.9181	1.18994	2.31162e-05
AC012501.2	74.6822	1.18967	8.43989e-08
STON1	979.045	1.18957	3.28588e-29
LINC01301	23.1879	1.189	0.0106531
TENT5C	137.876	1.18761	1.86563e-09
PNMA6A	795.946	1.18738	3.98563e-17
TEAD1	10940	1.18737	1.63918e-16
RN7SL689P	27.4755	1.18603	0.00319843
AHNAK2	1587.71	1.18456	4.68907e-12
ADAP1	466.521	1.18416	4.5215e-19
PAM	16151.9	1.18356	1.66712e-33
REEP3	450.383	1.18323	4.61577e-17
DLGAP1-AS1	142.86	1.18298	1.64889e-09
NNT-AS1	922.722	1.18251	3.55575e-13
SEL1L	4823.46	1.18119	5.70252e-17
ZFYVE28	231.036	1.18104	3.25852e-14
AL355601.1	25.6136	1.1803	0.00509826
UHRF1BP1	4704.98	1.18003	1.74755e-12
SLC31A1	4679	1.17994	5.2362e-50
RRN3P3	316.745	1.17985	1.3596e-06
PRKAG2	1255.56	1.17896	7.47677e-18
MICA	1140.37	1.17855	2.58915e-11
PPIC	3752.1	1.17847	1.87957e-51
FOXN3-AS1	91.6297	1.17684	5.19241e-07
CIPC	1125.99	1.17676	7.58469e-35
RAB17	2197.83	1.17592	3.48443e-14
AC083805.2	26.7639	1.17521	0.00132468
GFRA2	79.953	1.17512	9.22597e-05
AL160191.1	17.7975	1.1737	0.0252595
C2orf88	65.4365	1.17312	1.3422e-06
DAG1	8402.8	1.17265	2.70648e-27
KIF26B	25.085	1.17252	0.00773441
ADGRB1	36.1829	1.17244	0.0201691
INSYN2B	326.646	1.17227	4.86901e-06
NFKBIE	433.063	1.17138	3.08021e-10
BACH1	2018.7	1.17136	8.08941e-10
ABCA1	1561.31	1.17098	1.3351e-06
AL356056.1	31.6269	1.16923	0.00520518
MCOLN3	35.0987	1.16844	0.00317384
MAPT	583.65	1.16789	7.71797e-05
CEBPA	131.398	1.16782	1.07046e-06
LGI3	21.1673	1.16765	0.0413648
USP2	233.552	1.16733	4.36087e-12
FBXO32	739.397	1.16721	8.0446e-11
XBP1	4964.53	1.16628	1.33098e-32
HLA-B	7949.22	1.16544	1.23806e-28
BCL2	308.996	1.16482	7.94821e-08
DCAF8	5161.58	1.16471	7.9089e-96
AC243964.3	235.824	1.16461	6.37702e-12
SLC1A5	12852	1.16412	8.54013e-13
CLN8	972.521	1.16362	2.78087e-23
AC007389.1	30.0557	1.16266	0.00079307
SIRPA	3488.22	1.16116	2.44723e-19
FOSL1	1816.84	1.16109	1.23234e-05
FBXO10	1900.06	1.16067	2.98489e-15
TDRD5	15.6592	1.16058	0.0442941
TCEA1	7064.07	1.16055	9.24829e-08
AL022323.1	13.3165	1.15917	0.0377661
PAIP1	7799.81	1.15772	6.02751e-49
AL603750.1	23.8585	1.15714	0.00749068
ZNF165	17.8409	1.15701	0.012639
TSC22D2	1341.34	1.15663	1.32471e-17
ST8SIA2	194.5	1.15519	4.2327e-06
NA	18.9943	1.15395	0.0219175
FAM114A1	1772.25	1.15317	4.41206e-17
FENDRR	1374.19	1.15245	7.22775e-11
SCOC	836.976	1.15238	2.66728e-06
JPH1	95.1272	1.15235	4.69501e-06
SHISA9	161.724	1.15216	0.000146358
AL645568.1	62.751	1.15173	1.88018e-05
JDP2	1542.86	1.15171	9.60892e-08
OPA1	2577.86	1.15073	7.9933e-08
ARHGAP31	2564.11	1.15021	5.20068e-20
RPP25	1596.17	1.15003	1.69063e-46
ZNF391	378.831	1.14932	2.35233e-06
PSG5	429.153	1.14909	0.00300343
ZIC5	122.327	1.149	1.15792e-06
PCYT2	2161.94	1.14897	5.73165e-14
ACSL1	1243.22	1.14882	9.91646e-42
NA	29.0572	1.14847	0.000910336
MEIOC	288.867	1.14806	0.000913864
SIL1	1229.86	1.148	7.78569e-45
CNTNAP3	149.245	1.14715	6.78648e-08
DNAJB9	824.69	1.14657	7.47361e-09
SYPL2	83.1613	1.14619	1.26121e-05
SLC19A2	517.645	1.14593	3.23339e-18
CALU	26908.7	1.14585	3.47476e-20
ARL4D	533.065	1.14462	4.42751e-11
ABHD4	4610.11	1.14386	1.36226e-20
FBLN7	185.287	1.14382	2.54482e-08
CAMSAP2	2288.39	1.14358	2.70367e-11
FAM167A	682.861	1.14215	5.16445e-07
NIPAL3	1794.48	1.14175	3.44589e-45
PLTP	6996.73	1.14143	4.54996e-16
AGFG2	3050.77	1.14048	1.80434e-13
KSR2	287.877	1.1401	4.97357e-06
SLC25A32	1191.52	1.13983	6.48009e-20
CREB3L2	4451.67	1.13924	3.49744e-47
ARRDC4	850.417	1.13903	2.35884e-10
CCM2L	68.8057	1.13842	0.00181301
SPTB	236.361	1.13822	8.39514e-05
NOTCH2	14889.5	1.1381	3.77159e-56
CCN3	283.779	1.13731	1.18062e-12
ZMIZ1-AS1	20.9812	1.13708	0.0223293
BHLHE40	1231.61	1.13698	1.19794e-08
ABHD6	420.468	1.1361	5.60032e-22
CDK18	1261.47	1.13588	8.11611e-12
ANKRD18A	120.652	1.13557	0.000411616
NBR2	171.976	1.1347	1.28001e-08
INSR	813.98	1.13457	2.64085e-11
FOXN3	4410.15	1.13402	2.50633e-43
ZSWIM4	566.84	1.13393	1.38469e-20
AKAP2	11074.5	1.1339	1.25901e-38
FAM53A	165.883	1.13287	3.21809e-05
ADAM8	44.7245	1.13261	0.00208548
PLEKHB2	5020.26	1.13245	1.06519e-49
DOCK3	240.118	1.13196	1.97059e-13
HCG4	34.5714	1.13159	0.00115234
CALD1	17077	1.13098	4.02425e-18
H2AFY2	115.807	1.13076	4.03679e-09
SPTAN1	27548.3	1.12989	1.61544e-57
GLMP	3840.22	1.12962	2.30413e-15
IRF5	86.6791	1.12941	6.27611e-05
SAMD12	473.397	1.12937	6.56862e-06
EIF5	9765.15	1.12912	2.36211e-10
TMEM251	542.648	1.12803	1.10549e-26
AC096733.2	28.1648	1.12774	0.0162486
TG	75.6641	1.12738	0.0203749
CACNA2D2	61.4163	1.12729	5.08341e-05
KCP	42.917	1.12616	0.00071368
PTPDC1	927.004	1.12593	7.09419e-10
CDH23	14.59	1.12577	0.0354382
TMEM106C	4149.95	1.1254	1.77218e-51
PARVA	12811.8	1.12532	3.15549e-111
AC090159.1	39.8118	1.1252	0.000852979
S100A3	298.382	1.12494	4.79502e-11
TBC1D9	1044.57	1.12491	7.46113e-28
SLC6A9	461.557	1.12379	0.000104367
CHPT1	1064.87	1.12294	1.66992e-29
FAM221A	241.793	1.12293	8.16406e-12
PTK2B	244.602	1.12241	8.45569e-06
MAL2	92.765	1.12222	0.00640997
NAP1L2	60.8626	1.12159	0.00691606
BPIFA2	22.6494	1.12122	0.036881
ATXN7L1	780.669	1.1212	3.0952e-18
AC009086.2	455.056	1.12117	0.0026761
TTLL6	61.4126	1.1204	0.00423442
TOM1L1	731.021	1.11884	2.79422e-15
TM4SF19-AS1	41.3141	1.11825	0.0285813
AL357054.4	21.8584	1.11824	0.0117102
ATP6V1B2	7378.66	1.11809	2.28134e-39
SP100	2292.36	1.11804	5.17004e-47
EPDR1	1988.55	1.11692	1.37526e-21
SFXN3	2024.37	1.11669	3.21087e-19
CHURC1-FNTB	112.045	1.11552	0.0148061
CMTM8	58.1205	1.11536	7.81159e-08
CPQ	874.249	1.11344	1.22257e-15
PACSIN2	4740.17	1.11304	2.10656e-38
NNMT	7823.23	1.11263	1.4301e-08
ID4	43.8262	1.11096	0.000714347
SLC7A1	3757.96	1.11068	1.40597e-08
SOCS3	897.818	1.11022	5.69468e-05
ITGA5	9206.18	1.11009	6.88092e-14
CMC2	1496.24	1.10985	3.62068e-43
GPR3	101.69	1.10897	4.99809e-07
SLCO3A1	123.987	1.1087	7.30516e-05
AC004889.1	128.105	1.10726	0.000296322
STEAP2	51.6155	1.10676	1.81827e-05
AL121758.1	72.3296	1.10661	0.0201691
TBC1D20	4180.65	1.10659	1.66075e-62
KCNJ12	307.757	1.10654	1.20708e-06
TVP23B	715.077	1.1064	7.22035e-11
DSE	960.899	1.10604	9.36915e-34
ANKRD6	555.849	1.10542	7.82845e-11
B4GALT4	1171.39	1.10456	1.88299e-22
SLC12A8	358.03	1.10419	3.36807e-07
ULBP2	214.088	1.10399	4.72318e-08
FOXF1	786.625	1.1035	1.22799e-10
KCNK6	269.045	1.10274	3.30103e-16
MMP17	411.951	1.10194	6.01671e-08
SCARB1	3539.74	1.10087	2.7774e-33
F2RL1	1117.54	1.10035	6.12186e-17
ANKRD7	117.308	1.10023	4.19241e-05
PHEX	35.229	1.10009	0.0426902
RELL2	675.306	1.09944	4.55003e-10
KHDRBS3	71.8195	1.09891	5.3044e-05
ZFAND1	995.225	1.09797	4.68802e-07
AC020656.2	34.5194	1.09741	0.006488
NA	39.1227	1.0973	0.0129182
ZNF204P	105.068	1.09727	0.0010137
AC092338.1	1800.68	1.09715	1.03259e-25
LAMC2	82.0101	1.09674	0.000570296
LRRC32	365.5	1.09672	2.19233e-06
RORA	241.237	1.0964	3.54947e-08
OR2A20P	429.494	1.09529	4.88e-06
DKK3	22309.3	1.09398	2.02586e-19
RNASE4	101.25	1.09386	0.00302632
SPTLC3	200.183	1.09349	7.79706e-09
AF117829.1	217.252	1.09315	1.54173e-05
TCL1B	142.168	1.09313	8.9005e-06
BCAT1	1936.78	1.09295	1.01499e-08
AC012501.1	23.9665	1.09292	0.0127047
GNS	11274.4	1.09244	6.90013e-24
NUDCD1	1948.35	1.09219	8.8044e-13
ASPH	8470.78	1.09188	2.28397e-24
IGSF22	26.4519	1.09176	0.0070741
AC024475.4	21.4698	1.09174	0.0243774
LINC01881	83.2525	1.09085	0.00353181
RAB6A	4718.38	1.09039	2.70026e-30
PHACTR1	383.579	1.09038	1.18429e-16
CADPS2	265.757	1.0893	2.63702e-07
PTH1R	160.129	1.08786	7.83072e-07
CRYM	46.7097	1.08744	0.00127995
LINC01139	24.0875	1.08735	0.00485647
NFIL3	1500.97	1.08547	2.67666e-08
CFAP54	62.8594	1.08503	0.00319648
[truncated: 7,841 more rows]

## Sheet: DEgenes_SW872_TFE3_vs_EV
Gene	baseMean	log2 Fold Change	padj
AP003419.1	46.0143	21.1654	1.17273e-08
CXCR5	38.3826	19.4205	0.00460666
NMRK2	40.2395	3.58291	0.0167761
TFE3	7339.4	2.13897	1.72725e-127
PTGDS	58.4352	1.64437	0.0371852
SLC9A3	209.205	1.63064	2.66825e-10
RENBP	435.678	1.18531	0.000172421
MAT1A	731.653	1.02066	0.0112005
RRAGD	701.868	1.01266	9.92034e-05
GPNMB	7636.76	0.899695	7.36295e-05
UAP1L1	2532.82	0.663152	0.0301563
COL12A1	7146.72	0.568402	0.0221238
AC010442.1	720.723	0.442177	0.0221238
DAB2	9628.49	0.358876	0.0167761
OSBPL1A	2509.62	0.276255	0.0334202
CDK2AP1	4145.31	-0.319665	0.00644355
RNF139	1481.99	-0.396448	0.00202441
MMP17	411.951	-0.810353	0.0465452
PCDHGA11	39.1976	-5.54026	0.00955731

## Sheet: DEgenes_SW872_TAZ4SA_vs_EV
Gene	baseMean	log2 Fold Change	padj
CXCR5	38.3826	23.8193	1.84658e-08
AP003419.1	46.0143	21.1222	2.73221e-11
SALL3	117.017	12.063	0.0452524
NPPB	2240.65	10.6746	2.7524e-73
AC089983.1	88.3109	10.4906	2.6323e-16
LINC01750	27.4511	10.0458	0.00541672
SFTA1P	288.221	9.63758	8.17189e-26
RGPD4	132.856	9.10179	0.0201527
SLC18A3	36.7508	9.06896	4.08299e-12
KCND3	287.414	8.87766	8.68286e-87
KISS1	240.391	8.79209	5.98944e-54
IMPDH1P10	18.8587	8.68373	3.07768e-05
XIRP1	24.7075	8.58343	4.77547e-09
HBG1	1243.16	8.50504	1.47081e-62
TNNI1	87.9705	8.49508	1.02877e-24
APCS	10.99	8.47674	1.37519e-09
MC5R	25.2623	8.41742	2.05674e-10
SLC27A2	45.4861	8.28276	4.05179e-09
AC115522.1	25.3423	8.25592	6.21567e-10
PSG3	19.0141	8.09901	7.80023e-10
CEACAMP10	596.362	8.04653	7.98442e-102
CHRND	24.5877	8.03157	2.45312e-05
ANKRD1	2371.13	7.93168	1.24302e-76
INHBB	89.8295	7.68795	7.84159e-17
PSG2	45.1866	7.63161	4.28383e-16
KRTAP3-1	7.79881	7.61858	7.11846e-08
KRTAP2-3	13.1497	7.56241	1.10701e-07
KRT34	47.2634	7.45424	5.99851e-11
KRT81	3638.58	7.43794	1.25633e-200
THAP12P8	7.76332	7.41211	2.94504e-07
NA	9.83408	7.35228	7.35518e-05
PSG7	92.8379	7.3105	1.16914e-29
MYO7B	109.193	7.28435	1.69829e-15
MARCO	27.6742	7.28067	2.51286e-08
CAVIN2	121.51	7.27376	9.54309e-36
PSG6	42.7532	7.26366	2.32907e-13
KRT80	1730.68	6.98446	8.65277e-226
PSG4	1067.99	6.93343	4.46922e-182
VSTM1	56.6076	6.87664	4.81434e-21
LCN2	20.8996	6.8524	2.76253e-06
LNCOG	57.5927	6.81922	3.1635e-23
NPIPA2	22.558	6.80924	0.000472952
PDGFB	265.483	6.7477	3.27517e-82
RFPL4AL1	48.5818	6.73205	3.16418e-07
CXCR4	15.3456	6.7106	3.91069e-06
LURAP1L-AS1	37.6579	6.66197	2.45633e-12
KRTAP1-5	5.60044	6.64027	1.39074e-05
FGF19	32.8471	6.61936	3.31875e-07
PSG5	429.153	6.6021	1.73623e-97
AP003498.1	6.75928	6.5701	0.0001533
LCE2A	7.92885	6.56988	8.58204e-06
AL365184.1	7.78844	6.48045	8.46125e-06
TGM4	11.4518	6.43418	6.71558e-06
PRAMEF1	8.70867	6.42769	5.30694e-06
AC062015.1	5.36892	6.40343	2.35183e-05
ADCY8	7.41169	6.35765	1.05071e-05
LINC01186	8.42811	6.3566	6.90877e-06
PSG11	67.8098	6.31774	9.53863e-28
TNNT2	85.4604	6.31325	4.08085e-10
SPNS3	24.6211	6.27979	8.75793e-09
RPL23AP47	7.77961	6.22211	0.00251501
SNX18P24	5.71784	6.21052	0.000299487
PSG9	110.583	6.17803	5.0266e-34
PAPPA2	59.5562	6.16756	1.12665e-27
AC026316.2	27.2299	6.1614	1.02872e-10
DIRC3-AS1	14.9469	6.14356	9.02457e-08
PSG1	87.1469	6.1372	1.54818e-43
OR10Y1P	5.65555	6.05214	8.48426e-05
AC067773.1	17.6478	6.043	5.51746e-10
NA	6.6663	5.96481	0.00105382
CSTA	29.9604	5.84799	9.05622e-10
AC135977.1	22.0621	5.83318	0.0109087
RFPL4A	89.1395	5.81669	1.08339e-13
LINC00592	5.24462	5.80467	0.000122718
HBG2	280.091	5.79959	7.53468e-81
LY6K	276.185	5.78637	9.77508e-83
CEACAMP8	13.7874	5.76952	2.4467e-05
LINC02331	15.1578	5.76311	5.65036e-05
REXO1L1P	16.2111	5.74128	0.000567445
FOXB1	5.49741	5.71365	0.000268203
DRGX	5.39033	5.6934	0.000125663
MYL2	7.6746	5.67995	4.10493e-05
MYOD1	190.976	5.64315	1.25022e-17
AL159166.1	10.362	5.61822	6.89405e-05
AC245041.1	18.5183	5.61528	2.27101e-06
CHAT	14.3128	5.60285	1.80341e-05
IL7R	8419.82	5.60186	1.61052e-77
GGTLC2	5.28284	5.59379	0.000257656
AC100800.1	63.0212	5.5671	2.61698e-25
CLDN9	13.6013	5.56572	1.28928e-07
AC114488.1	8.47851	5.52818	0.000120672
LGALS9C	9.78064	5.48059	1.28478e-06
SPX	445.586	5.4579	1.09874e-44
PSG8	13.9843	5.45148	7.33507e-09
C17orf102	57.6305	5.4326	1.9849e-12
DEFB115	7.65804	5.42067	6.1544e-07
AL136452.1	5.43518	5.39722	0.000477312
LINC01293	57.5633	5.33998	1.16968e-11
IL1RAPL1	13.931	5.33898	3.5012e-10
TINAGL1	244.133	5.3276	3.17971e-53
AL009178.2	8.64126	5.32557	1.88527e-05
FRG2C	27.1678	5.31769	5.85896e-18
TNFSF4	327.521	5.30261	6.40674e-99
KRT86	789.172	5.30233	9.12208e-171
FRG2B	5.36797	5.27845	0.000397262
HBBP1	30.014	5.25036	3.02123e-14
TCEA1P3	6.55768	5.23183	4.55621e-05
AC107871.1	14.4419	5.22857	0.000133327
AC132068.1	5.38221	5.21281	0.000729512
TMEFF2	21.7217	5.20003	7.81068e-12
FPGT-TNNI3K	29.6309	5.18758	4.72257e-06
SAA1	78.5324	5.18233	1.5221e-50
AC018781.1	5.2134	5.18137	0.000677435
SAA2	14.6963	5.14731	7.87288e-09
MYH2	23.1887	5.13736	0.000281232
CCND2	40.5571	5.13194	4.18062e-12
GSX2	19.0038	5.1163	1.54322e-13
ADGRG4	32.7265	5.08739	3.88384e-06
TNFSF18	594.857	5.05503	1.29141e-17
REN	21.6442	5.04488	3.89707e-15
KCNU1	6.1493	5.03063	0.00188727
NGF	85.1259	4.96697	4.93952e-22
KRT87P	36.5711	4.96416	2.11902e-18
CHRNA4	6.45375	4.95215	0.000103277
PCDHGB8P	11.709	4.91955	0.029536
SERPINB7	182.295	4.91649	3.83678e-37
PLCE1-AS1	11.3519	4.91086	8.12084e-05
NA	5.31882	4.90255	0.0209672
CPA4	8124.8	4.89323	1.35169e-205
LYPD5	426.146	4.88941	9.84779e-54
GPR65	19.0007	4.88789	9.29999e-11
CDH4	706.331	4.8376	1.30946e-109
CCN2	8122.71	4.82824	3.60593e-137
2020-03-04	1178.18	4.82744	7.087e-83
RPL13AP20	27.5662	4.82608	5.43637e-14
LINC01291	43.4704	4.80978	8.60716e-11
MEI4	8.54489	4.79972	1.72092e-05
KLHDC7B	28.7075	4.75482	0.00160349
STXBP6	354.282	4.74037	6.99885e-98
KCNQ3	69.3694	4.73823	3.76629e-25
AC112656.1	16.7298	4.73239	1.47831e-08
MME	72.1838	4.70953	1.78708e-15
HSD17B2	349.729	4.69885	1.465e-93
AC114296.1	5.97291	4.69246	0.00191317
TMEM178B	177.537	4.67192	1.18983e-40
SYNPO2L	54.0993	4.66258	5.14704e-24
MT3	7.35606	4.64421	0.000547911
CAPSL	15.1272	4.64357	3.2338e-06
C4BPB	51.0916	4.6274	1.26149e-16
ASS1	1006.36	4.62358	1.41665e-29
ASB18	18.3513	4.62149	1.95921e-05
LINC02535	49.6485	4.59034	1.01367e-18
OLR1	33.6578	4.5729	5.70295e-09
WFDC21P	140.545	4.56764	1.5365e-26
VLDLR-AS1	123.311	4.55569	8.03063e-22
C2orf78	9.85946	4.54095	2.46689e-07
PADI1	49.5811	4.51991	6.77088e-22
ALOXE3	48.2345	4.51547	5.12467e-11
HS3ST5	7.6383	4.49499	3.05408e-05
NXPH2	6.69734	4.49283	0.0028386
CRLF2	21.3526	4.47377	7.97194e-10
OSCAR	347.156	4.4669	2.62923e-68
AOX1	235.061	4.4613	1.43566e-34
IL24	21.3933	4.45566	4.07247e-12
MYOSLID	13.695	4.43213	2.47953e-07
CEACAMP7	24.5102	4.4281	1.28182e-11
LAD1	18.1241	4.42649	1.89662e-06
CCN1	10596.6	4.42143	0
GPRIN2	25.9536	4.39438	2.20759e-10
FAM90A12P	21.0836	4.39008	7.86353e-06
NA	12.0435	4.37146	0.00329072
GFRA1	5.63952	4.34631	6.22823e-05
AC114550.1	11.4298	4.34321	3.94784e-06
FPR3	132.369	4.33816	5.7003e-43
NA	16.5134	4.33385	0.00499267
AL078612.2	11.2835	4.3305	3.68016e-07
AL451069.1	7.15026	4.32828	0.000810005
MYCT1	39.358	4.32183	3.48597e-23
PHF24	57.9882	4.30144	6.34706e-09
ZNF536	5.60413	4.29775	0.0057539
ALCAM	37.5207	4.2871	4.37203e-10
LHX5	8.73944	4.26802	1.16675e-05
AP000577.1	9.97578	4.26093	1.03265e-08
AL590004.3	1289.95	4.24794	2.17778e-95
LINC02154	47.1446	4.23554	1.25371e-25
LAMP3	296.148	4.2143	1.32331e-52
HBE1	415.275	4.21104	4.71645e-71
KRT73-AS1	27.9072	4.20707	8.49231e-14
HCN4	60.957	4.19674	9.62323e-16
RBFOX3	23.025	4.19528	3.90106e-11
LTF	52.0711	4.19447	3.44301e-20
AC092132.1	5.10503	4.18283	0.00331456
ITIH3	47.9212	4.16271	4.7213e-11
AL137129.1	25.3578	4.16138	4.29295e-05
LINC00702	14.0784	4.1444	0.00428346
LINC01198	6.3356	4.1442	0.00026518
AC079054.1	7.79762	4.13667	4.33819e-05
TAGLN	4862.19	4.13079	2.56645e-73
KRT4	36.4382	4.12153	5.79053e-06
AC034206.1	5.47996	4.12035	0.000400538
CST6	11.6176	4.11903	6.91835e-06
MYHAS	12.2104	4.11752	0.00239005
SUSD4	14.8044	4.11499	0.000227185
CTNND2	5.41834	4.11332	0.00235216
AL353743.4	7.12446	4.10781	0.0111593
STX11	126.227	4.10267	6.1864e-47
SPOCD1	189.911	4.07851	3.56105e-39
FGF21	23.9633	4.07004	0.00396111
AC022028.2	14.492	4.05807	3.14421e-07
AC103740.2	6.92252	4.05619	0.00179792
CSF2RB	37.9642	4.04918	2.9873e-21
ANKRD34C	8.91688	4.04831	4.9105e-06
AMOTL2	5194.21	4.03876	0
AP002478.1	8.76448	4.03792	0.000192891
AL161431.1	253.719	4.03366	1.91995e-98
GDF6	21.2965	4.0176	1.22847e-06
PRR20G	7.20683	4.01116	0.000156886
AL021153.1	5.18071	4.00922	0.00349412
AC010457.1	11.6086	4.00726	9.52409e-07
CA9	143.275	3.98372	2.77847e-06
KCNE1B	47.6024	3.9638	1.13373e-08
RNF144B	69.8438	3.96275	3.55907e-32
DUSP13	11.5273	3.96138	8.97923e-05
PADI3	60.4905	3.956	4.49602e-16
GUCY1A2	7.36927	3.9502	0.0162312
AC095350.1	25.6082	3.94389	5.75511e-10
SNX18P23	5.4203	3.94179	0.00476398
AP1M2	110.38	3.93104	3.20029e-11
WNT7A	74.4296	3.92415	8.08331e-22
AL049839.2	69.5747	3.92064	5.18128e-06
LINC01693	25.86	3.91761	4.60291e-11
KRT7	53.4513	3.90865	2.33091e-16
FKBP9P1	272.662	3.88528	9.24824e-39
MYH15	58.5142	3.88315	3.34899e-09
HBD	5.80001	3.87441	0.000624681
GPA33	14.5215	3.86669	3.51789e-05
AC011510.1	10.8127	3.86355	3.26867e-06
C7orf69	6.78884	3.86171	0.000152938
CHRNA1	65.2089	3.86048	9.99873e-06
TNNC1	56.7059	3.8479	4.45103e-20
TMEM155	10.5106	3.81253	1.37826e-06
AC018464.1	5.84079	3.81225	0.00384467
TPO	119.135	3.80634	3.98677e-24
MGAM	11.9121	3.80419	9.17758e-05
ANXA8L1	163.561	3.77128	2.30208e-28
PPME1	11265	3.76666	1.09753e-281
AC245041.2	17.4737	3.76406	1.28474e-07
TM6SF1	340.581	3.76254	6.38222e-28
ROBO4	76.2827	3.75618	1.0681e-13
CES1P1	26.6288	3.75171	3.5664e-07
LINC01511	8.69732	3.75075	0.000114653
AP003064.2	24.9414	3.74198	5.4386e-08
HYDIN2	17.0482	3.73824	0.00037921
LINC00707	90.4537	3.72402	1.48511e-33
CPNE4	26.7578	3.71144	2.23548e-08
OLIG2	29.1682	3.70708	1.42251e-10
NA	53.4927	3.7042	3.83955e-24
ANKRD2	7.83918	3.70186	0.00129197
NCF4	7.2674	3.70118	3.94414e-06
PLAC8	321.323	3.68305	2.99802e-44
TAGAP	49.231	3.68114	0.0167592
TMEM200C	23.7165	3.67816	7.34895e-05
WNT7B	200.41	3.66018	4.19614e-25
SERPINE1	2089.77	3.64913	5.25418e-112
LRRC38	9.87339	3.64821	5.78176e-06
AP001783.1	27.8508	3.64118	1.25489e-18
IGFN1	141.204	3.6395	1.95906e-11
CD177	28.3491	3.63698	9.4126e-08
AC010247.2	13.4253	3.58817	5.44596e-07
KRT8	14283.6	3.56185	3.43828e-225
GDF15	313.727	3.54743	5.7858e-11
IRX1	12.3297	3.54509	1.82007e-06
DUX4L45	69.4394	3.53537	2.09564e-33
ITGB2	124.991	3.5343	8.0781e-27
INHBC	11.5384	3.52955	1.90396e-05
MPP4	50.0275	3.52699	6.08584e-18
LINC00520	22.8813	3.51953	3.27442e-06
TENM2	351.633	3.49305	2.55e-13
PRELP	480.6	3.46845	8.21666e-16
RPL29P19	46.3452	3.45542	1.61817e-18
AC245100.6	52.1792	3.45527	8.60716e-11
GDAP1L1	48.3384	3.44324	1.67112e-11
FAM201A	45.6417	3.43691	1.52383e-12
AC121757.1	28.9494	3.43098	4.01853e-11
AC016717.2	5.2611	3.42608	0.02122
MEGF6	249.491	3.4248	3.36775e-20
HRH2	76.3752	3.41995	1.14961e-21
FOSL1	1816.84	3.41953	4.01123e-43
CLDN1	777.372	3.41909	2.89219e-32
AL590644.1	26.0394	3.41801	3.87745e-11
BX640514.2	77.9029	3.41415	4.35604e-22
SLAMF9	7.09593	3.40198	0.000131586
LINC00525	14.5927	3.40197	1.5966e-07
KCNJ1	6.18717	3.38752	0.0127308
LINC02243	8.29723	3.38322	0.000103277
SBSN	9.30733	3.3795	3.79977e-05
INHBE	431.566	3.37623	4.39758e-08
TNFRSF12A	3033.22	3.37607	5.09179e-112
AC245100.3	41.7872	3.36257	5.80054e-09
PTPRN	673.399	3.35788	1.3585e-70
DUX4L31	29.2581	3.35185	4.13358e-16
NEGR1	205.265	3.35138	3.02404e-24
HCLS1	91.6823	3.34821	1.05917e-32
CSDC2	8.6596	3.34778	0.00110702
HNRNPA1P33	8.0898	3.34185	0.00252246
KRT17	109.933	3.34011	2.1167e-08
NDUFC2-KCTD14	12.133	3.33701	0.0226842
ITGBL1	61.5858	3.33006	2.02664e-18
ESM1	570.393	3.32976	2.56192e-25
EDN1	1541.88	3.32965	2.53771e-56
PSG8-AS1	10.1372	3.32121	1.20758e-05
GRIP1	17.4806	3.31963	8.55214e-09
TMEM52B	10.5597	3.31614	0.0065118
PIWIL2	12.986	3.31307	4.03683e-06
IL32	397.832	3.30035	1.4794e-33
FAM19A5	5.77879	3.28607	0.000420684
CALCB	23.0098	3.27405	5.81861e-06
ZP1	57.8803	3.27295	1.07176e-08
WDFY4	28.3648	3.27187	1.79792e-06
TMEM130	81.1848	3.26874	2.20959e-18
TMEM92-AS1	16.1106	3.26381	1.89974e-05
RXFP3	26.7965	3.26117	3.69573e-09
HDAC2-AS2	45.653	3.26035	7.98964e-17
HNF4A	25.9329	3.25988	0.000809661
EVI2B	11.7183	3.24166	2.53296e-05
SNAPC1	2436.41	3.23535	1.34791e-58
FGF14	12.636	3.23501	0.000280223
NKD2	30.1177	3.22737	3.42004e-10
ARC	110.273	3.22159	1.87252e-22
KLK8	6.26611	3.22017	0.00243342
AC004233.3	52.9481	3.21832	6.01697e-22
NA	43.8009	3.21575	2.19209e-10
AXL	11912.6	3.20642	4.26825e-81
EFEMP1	741.11	3.2051	1.68955e-63
C5orf67	8.95705	3.20369	0.00018628
SERPINB2	585.296	3.19405	3.51963e-25
AC005832.4	89.2836	3.19377	0.00855753
AC092384.2	8.42292	3.19216	0.00100685
PLAUR	813.972	3.18996	2.49242e-80
PROSER2-AS1	38.0848	3.18313	1.42895e-12
VCX3A	15.5964	3.18111	1.25858e-06
FLT4	134.851	3.17711	7.59188e-18
GNAT1	22.3412	3.16916	0.000595098
COL4A3	9.19293	3.16854	0.00668977
RGCC	105.66	3.16443	4.81184e-23
SLAMF7	176.448	3.16221	3.45169e-09
SZT2-AS1	13.3174	3.16101	4.30115e-06
AC010207.1	29.9864	3.15776	3.48857e-12
UCA1	6683.97	3.15668	8.75914e-52
AP000879.1	26.4533	3.14231	0.0361789
FMN2	287.733	3.13412	1.57327e-36
SCG5	39.158	3.13269	1.97789e-16
LINC01615	22.1492	3.13203	6.85065e-10
TMEM156	66.5852	3.12889	1.82542e-12
AL683807.1	11.7489	3.12796	2.32368e-05
NYAP2	8.48815	3.12433	0.00288122
MYO5B	212.805	3.11247	8.31914e-25
GBX2	105.784	3.10475	5.02408e-48
TGFB2-AS1	227.616	3.09318	1.99466e-56
IL21R	123.001	3.08748	8.49482e-14
RPL12P14	37.5438	3.0851	3.18142e-12
INKA2-AS1	103.696	3.08415	2.63134e-20
MIR503	28.3776	3.08056	6.37183e-08
AC098613.1	9.12088	3.07826	0.00331504
ILDR2	71.7615	3.04705	5.03477e-09
SHANK2	32.4746	3.04611	0.00215912
C7orf65	7.88488	3.04434	0.0071449
TNFRSF9	304.31	3.0432	1.41401e-32
CES5A	10.8198	3.04176	0.0141942
RASGRF1	134.707	3.0297	1.16501e-24
AC105411.1	36.1041	3.02904	2.99176e-09
EXPH5	144.926	3.02134	1.19177e-34
GRIK5	70.4144	3.01665	1.56854e-09
AC018816.1	5.31245	3.01511	0.00793789
CSF2RA	877.851	3.0132	7.90148e-62
RCSD1	77.4899	3.01059	8.67318e-19
AL365181.3	171.315	3.01041	9.29097e-31
CD24	529.119	3.00778	8.59376e-49
VN2R19P	6.4042	3.00351	0.00130513
MOV10L1	49.2002	3.00299	3.86714e-12
BRS3	15.9866	3.0028	5.48133e-06
CLDN3	137.103	2.98219	3.40253e-39
AC009238.1	10.0332	2.97795	0.000363466
LINC01583	42.7513	2.97406	2.34052e-14
AC092850.1	7.7751	2.97329	0.000603832
CD274	323.624	2.97202	5.07779e-54
BDNF	222.34	2.96817	4.73527e-64
CDC42EP3	1854.37	2.95909	1.20028e-40
MFAP5	48.1055	2.95905	9.96819e-08
IL11	145.478	2.95836	5.97813e-35
LINC01638	242.897	2.95788	2.11972e-38
FAM3B	10.0799	2.95422	2.90812e-05
C6orf132	13.1954	2.95399	0.00106772
NPY4R2	11.662	2.94797	0.0121139
PLAC1	82.0856	2.94763	3.74106e-32
AL355312.4	60.3721	2.94697	1.44536e-28
LINC01425	7.67861	2.94075	0.000291083
AC105105.1	257.262	2.93712	2.31291e-09
MYOZ2	10.3989	2.93653	1.54229e-05
TMEM178A	50.349	2.93532	1.02866e-15
CASP14	7.6502	2.93444	0.00607838
FAM90A24P	23.254	2.93285	3.99262e-07
MSLN	108.511	2.93167	3.8136e-15
LINC00882	70.5377	2.92808	7.84738e-27
ALDH2	6.14512	2.92094	0.00921031
RPLP0P2	306.694	2.91909	1.39241e-43
NA	26.5706	2.9182	1.48886e-05
AC005150.1	7.24929	2.91699	0.00110205
FLNC-AS1	13.8951	2.91205	5.2249e-05
KNDC1	17.6634	2.91085	0.0211341
MAGEB2	14.5196	2.89964	3.0657e-07
GADD45B	977.097	2.89661	1.74809e-145
KIF21B	1486.65	2.89614	4.22967e-50
TDRG1	14.3254	2.89461	5.707e-07
KCNK13	67.7706	2.88824	8.22955e-34
AC090505.1	11.221	2.88487	0.000361843
MAP3K15	28.1466	2.88124	6.50738e-09
AC008429.1	55.5019	2.87055	5.03943e-12
FST	410.437	2.86827	7.23235e-26
AP001189.5	7.63295	2.86127	0.00379045
AC126768.2	6.37666	2.85835	0.00935714
UPB1	37.1543	2.85834	1.81041e-09
AL023881.1	23.0707	2.85509	2.79043e-06
TSPAN2	207.195	2.84897	9.48179e-30
NDRG1	8255.21	2.84387	6.89506e-48
EEF1A2	5981.38	2.84142	1.56597e-128
CDH1	23.8792	2.8374	9.44427e-05
FAM166B	10.4288	2.82792	7.67865e-05
TRPM1	8.30346	2.82598	0.0470573
SLC12A8	358.03	2.82289	7.34103e-45
GOLT1A	20.8545	2.81396	1.14842e-09
AWAT2	6.56024	2.8049	0.0179526
AP000892.3	436.227	2.8032	9.62724e-52
LINC02057	19.3481	2.79674	1.7722e-06
CES1	60.9109	2.79673	8.07203e-13
DNAJC6	116.134	2.79623	2.15361e-15
SMPD4P1	9.90262	2.79545	0.00196136
KCNQ1	14.7247	2.7887	0.000699632
INHBA	62.2871	2.76967	3.29317e-26
ADAMTS16	718.058	2.76794	2.53253e-33
TMEM154	315.18	2.76292	3.79461e-20
NEK11	62.0841	2.76272	1.11568e-10
AL590483.1	14.4173	2.76177	2.87996e-06
LOX	1600.91	2.75587	1.42555e-49
PTPRR	11.794	2.75223	0.000214239
MUC3A	74.0758	2.75098	8.08175e-09
SERPINB8	817.262	2.7498	2.55013e-38
AC110048.1	5.15184	2.74916	0.0129102
CLSTN2	328.291	2.74396	2.68436e-31
APLN	612.381	2.74358	5.38369e-27
TMEM132E	67.2506	2.74319	2.45415e-07
HNF1B	9.01972	2.74242	0.00181879
AC022239.1	18.6961	2.73573	8.62401e-08
SLC7A11-AS1	23.4096	2.7326	0.0126164
ARFGEF3	55.4251	2.72846	2.3124e-13
EPS8L2	349.988	2.72057	2.65266e-38
HRASLS	31.7142	2.7178	1.72486e-09
GRIK4	72.0864	2.71664	3.41974e-07
TSKS	10.5557	2.71591	4.70944e-05
AL355512.1	12.3125	2.7152	0.00314551
SLC6A1	26.4573	2.71384	0.000146427
CRYBG2	93.984	2.71384	2.76736e-10
DCSTAMP	13.8941	2.70914	2.48754e-05
HMGA1	9467.27	2.70547	2.11329e-97
ELFN2	490.724	2.70467	9.2635e-36
RPSAP71	7.43295	2.70464	0.00104302
SLC7A3	41.6683	2.70198	4.39424e-08
AL391422.1	7.10207	2.70169	0.00366496
FOXG1-AS1	5.64295	2.69428	0.028805
INSYN2B	326.646	2.6925	5.1683e-29
POU3F3	5.20792	2.69214	0.0068823
OXTR	109.044	2.69193	1.35534e-16
NCF2	11.7639	2.69168	0.000677435
KRT18	26282.3	2.68727	2.16795e-122
DMBT1	9.37698	2.68649	0.00282027
ADAM18	22.123	2.68601	1.90657e-05
GAS6-DT	47.949	2.67781	2.95023e-15
SULF1	13.7387	2.6748	0.00668675
AC011591.1	33.094	2.67452	1.4763e-07
MATN4	29.8506	2.67447	5.75923e-09
GALNT18	150.014	2.67402	1.52062e-29
AJUBA	9629.72	2.6722	6.47716e-56
TGFB2	3830.69	2.67027	1.57044e-149
OGFRL1	1421.08	2.66578	8.27932e-57
AL590666.2	45.6317	2.6644	4.19287e-17
AC015909.1	13.0144	2.66258	0.00599655
AC073610.3	16.2154	2.6611	8.75468e-05
SPATA8	7.77624	2.65614	0.0013871
PSCA	27.2928	2.65143	5.21151e-08
BEX2	181.767	2.65075	2.98997e-13
AL353608.3	5.07783	2.64864	0.0323749
AC009299.1	54.0118	2.64788	3.77833e-12
AC087667.1	30.9584	2.64601	1.53024e-09
AC007952.3	21.0499	2.64398	0.0340408
AC004877.1	19.2244	2.64289	9.23248e-06
RBM24	126.653	2.64191	1.65407e-17
ALPK2	2595.84	2.63778	3.85872e-32
CHAC1	753.122	2.63705	1.92158e-09
AL138828.1	7.5723	2.63584	0.0128316
NPY4R	21.7467	2.63515	6.42684e-05
GPR1	155.127	2.63153	0.000463828
DUSP1	581.984	2.63088	1.40952e-38
SUN3	13.0269	2.63086	0.0014662
AC015987.1	29.6551	2.62172	1.27384e-09
NEUROD2	17.2565	2.61697	0.00455503
CEACAMP11	8.4405	2.61362	0.00394234
RBPJL	20.9217	2.6074	2.71634e-05
UGT3A1	24.5467	2.60658	0.00208368
NOC2LP1	35.0137	2.60531	5.01953e-10
S100P	8.50637	2.6014	0.0228798
ANKFN1	98.2236	2.60021	2.57391e-21
HEPACAM	11.7885	2.59512	0.0194815
GRIN2B	12.8507	2.59298	4.734e-05
GREM1	25.9871	2.59128	1.15028e-06
SMPD3	199.624	2.58984	3.57019e-14
DHRS3	27.8973	2.58642	3.7716e-08
CES1P2	28.2343	2.58612	1.09563e-07
FBP1	21.3121	2.58573	7.92713e-05
AP004607.3	9.87438	2.58486	0.00104394
AC009292.1	5.75294	2.58343	0.00708151
CST7	33.3339	2.58089	1.71411e-09
DUXA	17.7869	2.57674	0.000501466
LINC00513	40.8228	2.57185	1.50018e-14
LINC01204	6.56561	2.57136	0.00890366
MAGEA4	9.33668	2.57013	0.000170094
SBF2-AS1	216.803	2.56841	9.78794e-36
AC084783.1	9.84827	2.56841	0.00242895
AC011944.1	11.9147	2.56636	0.00113778
MYRIP	5.79658	2.56367	0.0247533
TCEAL2	28.4	2.56158	3.06655e-09
ZNF185	2431.65	2.55802	5.07946e-127
F3	631.683	2.55766	1.89404e-39
GDA	761.697	2.55535	9.98697e-40
AC026250.1	102.798	2.55415	7.10502e-28
AL645608.7	11.7846	2.55208	0.0104453
AC069368.1	13.9531	2.55091	0.015325
MUC5AC	33.8583	2.54945	4.6715e-06
AC003092.1	11.6684	2.54794	0.0133817
FO681492.1	191.839	2.54677	1.98032e-21
ANXA3	816.372	2.54543	2.71396e-40
KIRREL3	364.198	2.54374	1.09123e-37
COL8A1	2277.35	2.53833	4.53388e-39
PPL	285.507	2.53769	1.56273e-31
POU2F3	18.5137	2.53635	5.22992e-05
IL6	31.6535	2.53477	6.94271e-06
C6orf223	35.0525	2.53433	2.01887e-06
IL20RB	107.38	2.53098	1.78038e-10
AL035458.2	6.03124	2.52806	0.00564147
RBP7	234.866	2.52476	1.84291e-48
NA	21.8401	2.52381	3.88449e-09
UGCG	4030.04	2.51756	1.27976e-103
BMP4	3231.11	2.51566	4.91091e-58
WWC1	602.145	2.51433	1.12368e-58
CRIM1	9816.06	2.50894	4.90013e-112
AC090152.1	15.6025	2.50855	4.17765e-05
BASP1	2291.35	2.50677	1.91651e-63
AL844175.1	5.24305	2.50066	0.0162907
NA	8.85467	2.49818	0.000413931
ASNS	14006.9	2.49176	5.17786e-25
GJB3	26.3413	2.49102	7.35518e-05
LPO	43.9406	2.4904	6.33101e-07
IRX4	106.604	2.49001	1.20046e-26
SLC35F3	102.799	2.48652	3.81088e-25
LAMC2	82.0101	2.48148	5.46953e-18
ADM2	805.235	2.47998	2.83457e-10
CELF2-AS1	7.07046	2.47136	0.00394774
ENO2	1006.58	2.4694	1.28044e-30
SH2D5	415.685	2.46931	2.24091e-85
ADGRE4P	80.4851	2.4633	3.24797e-12
DIO2	72.3743	2.46187	3.79538e-08
FO393418.1	6.8788	2.45738	0.00202806
NA	225.558	2.45688	1.52231e-44
LINC01605	45.7997	2.45395	2.76759e-07
AC012464.1	11.5772	2.45122	0.000286982
SHH	5.38138	2.45008	0.0143915
NA	17.6658	2.449	5.34707e-07
NTN1	74.0974	2.4483	5.62246e-12
AC016705.2	94.4219	2.44505	2.49941e-12
ARHGEF28	3310.08	2.44357	2.33653e-56
ATF3	836.543	2.44154	2.13523e-19
NOX1	21.8478	2.43928	7.70579e-05
MATK	61.0128	2.43668	2.2355e-14
S100A16	1005.65	2.43512	1.40104e-82
CYTOR	2035.6	2.43346	4.75207e-122
CGB2	5.41876	2.43279	0.0065281
ARHGAP40	27.1446	2.43161	1.27381e-06
SSTR5	7.06648	2.43068	0.00328271
CATSPER1	133.985	2.42935	4.39783e-29
SHOC1	8.46987	2.42934	0.0334917
AL391422.4	577.933	2.42312	3.266e-30
CREB5	770.273	2.42279	5.5477e-20
FAM228A	5.20443	2.42057	0.0241762
TFCP2L1	94.356	2.41853	2.12429e-12
SFN	28.7319	2.41818	8.87024e-10
CEACAM22P	11.6586	2.41818	0.00184535
COX6B2	38.7777	2.41125	1.38532e-08
PIM1	1122.78	2.41079	6.28024e-34
KHDRBS3	71.8195	2.40996	6.92926e-23
MAEL	7.77469	2.40995	0.00534629
AC010255.1	15.3231	2.40984	0.000300284
LINC01121	12.1904	2.40782	0.00184057
MS4A4A	31.2221	2.40389	8.43795e-06
PPP1R15A	3154.01	2.40281	5.78927e-32
STC2	5840.25	2.40168	7.44719e-16
JDP2	1542.86	2.39787	4.29239e-31
AC017002.1	16.7628	2.39604	4.30248e-05
CLGN	74.7607	2.39506	2.12143e-05
UNC5A	9.61446	2.38904	0.00302381
PTPRB	576.911	2.38637	3.293e-43
KLHDC7A	24.9132	2.38545	0.00778794
CDA	83.8268	2.385	5.45202e-17
IL31RA	161.121	2.38327	6.76891e-20
HAVCR2	347.799	2.37823	2.59195e-28
RPS6P12	74.8827	2.3782	1.71625e-21
AKR1C7P	9.92129	2.37702	0.00334364
PLCB4	1544.33	2.3748	8.09405e-35
AC011603.2	323.602	2.37265	7.28673e-05
IGF2-AS	6.86792	2.36845	0.00371618
ABL2	2982.84	2.36769	7.89991e-111
LCP1	1000.93	2.36576	1.26125e-19
TMEM92	202.848	2.36084	6.03169e-40
NANOS1	479.332	2.35868	3.25594e-47
ASNSP1	400.97	2.3567	7.74462e-13
TEX19	43.5551	2.3534	3.62996e-12
AC011313.1	22.4198	2.34958	8.76433e-06
EPHB1	77.5404	2.34906	5.29714e-08
AP005901.1	10.9583	2.34748	0.000260818
MAFF	607.032	2.34712	2.83053e-38
AJAP1	312.825	2.34605	1.45133e-28
AL136131.3	28.3149	2.34589	0.000106676
SH2D1B	48.0856	2.34577	8.49066e-14
RIMS2	41.0736	2.3416	0.000331184
LINC02273	6.80735	2.33786	0.0141725
CYP2B7P	34.1976	2.33558	2.81739e-05
NOG	208.133	2.32801	8.41803e-14
TMEM45A	771.371	2.32799	5.75358e-35
NANOGNB	5.1636	2.32661	0.0274647
TUNAR	7.53494	2.32526	0.0135239
AC020934.1	20.7445	2.32125	5.54155e-06
SH2D4B	5.65737	2.31749	0.0279593
SEMA3B	1213.28	2.31508	1.28747e-30
DPP6	11.996	2.31409	0.00597639
LNCOC1	35.34	2.312	1.19768e-07
PRKAG2	1255.56	2.30925	1.54881e-67
INSC	8.95277	2.30889	0.00488658
SLC7A5	18550.7	2.30583	1.3356e-12
AL713998.1	83.7557	2.30555	4.45789e-09
FOXE1	349.402	2.29811	3.58159e-37
NLRP5	272.561	2.29673	1.27986e-26
AC009139.1	7.51699	2.29464	0.0125425
HIF1A-AS1	59.9462	2.2945	1.40288e-13
GOLGA8IP	12.8711	2.28912	0.0252983
LINC00958	7.13338	2.28503	0.00492002
UNC13D	102.386	2.28317	3.30475e-11
ITGB2-AS1	20.004	2.283	0.000315915
PRKCE	1501.61	2.2818	6.32621e-29
AC130304.1	149.987	2.28147	0.0313218
KLC3	240.305	2.28141	1.4263e-37
CNN1	297.693	2.28034	1.96447e-12
USP41	16.7344	2.27785	0.0260111
SIK1B	50.9333	2.27751	2.06746e-07
AC107956.1	22.9916	2.27731	4.35637e-07
MYCL	127.961	2.27375	3.67613e-17
OLFML1	58.5392	2.27263	2.67898e-05
CABP7	22.8784	2.27245	7.31344e-06
CELF2	578.24	2.27212	2.20558e-39
HS1BP3-IT1	7.82925	2.27015	0.0119238
EPPK1	92.8434	2.26676	1.2786e-23
AC016571.1	5.65372	2.2629	0.0131184
ARL11	11.0128	2.26278	0.000662751
AL121890.4	11.6839	2.26176	0.000397178
AC093616.1	454.26	2.26166	1.31418e-44
KSR2	287.877	2.26101	6.19232e-22
SIGLEC6	13.0246	2.25821	0.00116651
SERINC2	3346.32	2.24905	1.12674e-34
TCL1B	142.168	2.24622	9.10184e-23
AC004917.1	9.77783	2.24408	0.00058162
TMEM184A	186.803	2.24144	2.56308e-14
MIR503HG	2154.71	2.24028	2.51129e-23
AC017002.3	10.7908	2.23924	0.00206694
LIMS2	478.474	2.23755	4.31489e-34
BMPER	162.733	2.23649	1.13764e-09
SLC5A4	15.9236	2.23567	5.39307e-05
KCNE1	13.6917	2.23406	0.000315915
ACTR3C	65.5209	2.2333	3.21902e-07
NA	13.8747	2.22563	0.00361619
C21orf59-TCP10L	27.0348	2.22247	0.0330873
LINC01933	13.4281	2.21976	0.0124647
AC090241.2	9.36514	2.21716	0.0248698
AC243972.1	13.6186	2.21685	0.000632834
ADARB1	2219.52	2.21614	1.73199e-22
OLAH	10.3869	2.21592	0.00206955
CRIM1-DT	61.0346	2.21527	2.52273e-17
LINC01764	8.55925	2.21411	0.0105798
EMX1	5.97986	2.21368	0.0460688
LINC02487	24.112	2.21131	4.92262e-05
SMIM34B	6.9766	2.20879	0.0403694
AC124947.1	10.904	2.20601	0.0162168
CD3D	25.3565	2.2033	3.05091e-09
SLPI	49.8873	2.20294	5.8701e-10
ADAP2	273.076	2.20119	2.20774e-32
LINC00973	7.72761	2.19794	0.0349344
CAV1	23107.4	2.19667	4.63573e-72
AP003469.4	15.3462	2.19625	3.89134e-06
LINC00601	16.0377	2.19559	0.000110368
APBB1IP	649.923	2.19281	1.04362e-50
TRIM29	531.289	2.19269	7.11878e-19
HYI	1853.67	2.1889	2.92714e-67
RGS7	47.6613	2.18888	1.10048e-13
TBC1D2	462.515	2.18811	4.24017e-48
GPRC5A	3645.52	2.18541	4.56786e-55
AC008676.1	5.89163	2.1804	0.0199017
TUFT1	886.636	2.17984	5.7773e-76
FAM180A	81.8817	2.17589	7.33562e-08
HSPB3	33.7164	2.17548	0.00012945
TXNRD1	33083.7	2.17291	2.71479e-33
LINC00689	9.95143	2.17202	0.00719966
VXN	179.482	2.16891	6.91341e-25
WNT5B	481.159	2.16782	1.76343e-30
ACKR3	110.635	2.16381	1.88201e-20
MFNG	16.5451	2.1611	0.00246424
PLEKHA7	2443.23	2.16024	2.24762e-44
MIR4435-2HG	2097.29	2.15971	7.68938e-106
AC136628.1	42.0786	2.15515	3.57018e-06
SLC16A12	9.18504	2.15336	0.00979846
DUSP8	315.648	2.15104	1.76291e-18
AC005481.1	58.8265	2.1497	3.24044e-16
TOX	45.3474	2.14576	1.62072e-11
PPP2R2C	56.8104	2.14374	2.79451e-06
IGFBPL1	580.178	2.14122	6.9327e-65
NA	13.1429	2.14118	0.00339686
AC124276.1	10.9518	2.1395	0.00433853
UNC5CL	15.0778	2.13941	0.00102967
OR51B5	232.916	2.13929	1.48789e-53
NA	5.30888	2.13915	0.0225577
PICART1	40.0976	2.13699	2.66535e-09
NMNAT3	18.8127	2.13613	4.51685e-05
HSD11B1-AS1	25.9119	2.13214	5.57238e-06
HMX2	8.63397	2.13189	0.00232074
CAPN6	166.405	2.12835	1.9542e-19
LINC00239	13.3766	2.12741	0.0106515
SEMA7A	526.885	2.12393	3.2585e-33
AC092162.3	14.4672	2.1235	0.000167573
AC106760.1	323.398	2.12224	7.01078e-42
BCL11A	26.1445	2.1197	3.44704e-05
MYPN	979.769	2.11951	1.90967e-30
AC010247.1	21.5196	2.11942	0.000136255
LINC01436	88.9071	2.11624	2.51752e-21
CHST4	31.9593	2.11399	0.00048622
VSTM2L	409.495	2.11136	2.60843e-30
NA	18.724	2.10638	0.000120318
PEAR1	1120.15	2.10278	1.65224e-59
ATP6V0A4	28.1278	2.10209	0.000172865
AC122710.2	8.91119	2.10201	0.0133947
LURAP1L	175.711	2.09968	3.21645e-14
AC073283.1	6.95184	2.09821	0.0175049
DLGAP1-AS2	423.872	2.09687	4.49759e-19
TEX37	13.3423	2.09529	0.00490189
AL591926.5	6.90549	2.09496	0.0157817
PNCK	57.1084	2.09451	1.3223e-05
FCMR	73.1085	2.09169	1.33859e-11
AC073610.1	10.5828	2.09104	0.00899636
AC148476.1	31.4367	2.08647	1.90695e-07
AC006273.1	24.6712	2.08633	1.98777e-06
MYL7	7.43416	2.08425	0.0201607
INHBA-AS1	14.9961	2.07886	0.000644319
AC139491.2	236.388	2.07796	1.61682e-15
NMRK2	40.2395	2.07643	0.0446827
AL390195.2	16.8046	2.07446	6.55851e-05
AC090409.1	76.0238	2.07438	8.75903e-16
TRIB3	8474.98	2.07349	2.22467e-09
PTPRF	14910	2.07339	1.32773e-68
NA	1365.07	2.0732	3.52309e-62
SPECC1L-ADORA2A	222.306	2.06994	7.41293e-14
FAM90A2P	9.66437	2.06952	0.0151672
OCLN	724.086	2.06952	6.07477e-21
PSAT1	16232.4	2.06651	1.58879e-22
AL157400.2	6.20263	2.06647	0.0235059
AC097059.2	16.2489	2.06173	0.000319915
EHD4	2189.69	2.0589	4.70298e-90
LINC01602	20.3807	2.0561	1.74767e-05
NA	39.1227	2.05588	3.13722e-07
DUBR	562.705	2.05532	1.09418e-44
AC129492.2	18.5877	2.05516	1.4451e-05
CYFIP2	654.882	2.04903	2.81175e-17
AREG	9.79271	2.04649	0.0104098
ESR1	33.6611	2.04184	0.0227955
AP003717.1	9.46488	2.04173	0.0465724
LINC01203	6.58488	2.04111	0.016437
FAM163B	39.1843	2.03882	1.17113e-05
FGF23	33.3353	2.03784	0.0193611
AC104109.4	6.37113	2.03778	0.0408913
AC078905.1	7.96788	2.03597	0.00684663
AL355916.1	143.212	2.03594	1.87543e-22
MYH9	39701.7	2.03579	1.82048e-90
LINC01018	72.3229	2.03556	4.18186e-17
OTOF	23.8113	2.03536	0.000999107
CFAP52	12.9006	2.03263	0.00807658
GLI1	189.012	2.03248	1.2262e-09
VENTX	11.2406	2.03164	0.00162017
PAEP	37.8275	2.03092	5.62806e-11
NA	7.98045	2.02813	0.0043305
RPL24P8	15.7547	2.02678	2.92976e-05
INKA2	917.345	2.01608	1.65486e-27
PDE1C	3542.72	2.01427	1.28034e-26
S100A3	298.382	2.01303	1.12674e-34
APBA1	534.11	2.01143	4.66738e-30
PSTPIP1	14.5641	2.01112	0.000151618
MET	4328.73	2.00928	2.83244e-42
NA	26.0402	2.0088	1.23383e-06
NLRP3	205.315	2.00404	2.03587e-15
S100A2	104.41	2.00079	3.25054e-09
CD55	1726.45	1.99994	5.17038e-96
PPP1R32	33.17	1.99603	7.37464e-08
NA	43.0297	1.99407	3.23937e-05
GAS6	1171.45	1.99217	1.86558e-22
DNAJB13	31.783	1.98998	2.02414e-06
AL136295.4	47.2518	1.98706	0.00260015
AC005670.2	15.0789	1.98556	0.00662181
SHOX	186.872	1.98409	1.32584e-24
Z99943.1	6.15488	1.98332	0.0427031
FLNB	29152.8	1.98252	3.70626e-52
GPR20	11.9077	1.98229	0.0276914
FUNDC2P2	18.7489	1.97958	0.000400237
MYL3	32.8079	1.97643	1.25817e-05
PRTN3	8.68075	1.97538	0.00800666
ARHGDIB	757.049	1.97408	7.74183e-23
AC138969.2	22.2392	1.97308	1.32914e-05
AC009227.1	9.181	1.97251	0.00376954
AL137918.1	5.86946	1.97172	0.0213719
CALB2	75.5926	1.97013	3.10305e-10
LINC00869	134.113	1.96849	9.71309e-07
AC073569.2	42.5942	1.9668	8.27726e-06
XPNPEP2	24.9009	1.96583	0.000214635
CLIC6	238.71	1.96417	2.06187e-29
AC091806.1	113.723	1.95794	1.55177e-10
POU2F2	515.417	1.9576	7.01668e-18
TCP10L	15.4854	1.95684	0.000160835
PLEK2	599.795	1.95525	1.83752e-41
NEUROG2	6.13522	1.95475	0.0276093
ZNF534	9.30829	1.95385	0.01758
ADM	794.991	1.95283	9.53932e-30
MGLL	4291.09	1.95268	1.31013e-53
CAV2	2124.49	1.94852	1.66629e-58
AC091182.2	17.0048	1.94831	0.000250709
ERBB3	99.3133	1.94548	5.23785e-10
DEPP1	122.398	1.9385	1.23936e-08
C7orf57	122.246	1.93695	4.73719e-10
DAW1	15.7397	1.93421	0.0105469
ZIC5	122.327	1.933	9.39004e-18
GNA15	12.5883	1.9273	0.00203443
GRIN1	70.8332	1.92722	1.1009e-11
LATS2	922.068	1.9268	8.75202e-69
HRK	25.9512	1.92624	0.00874549
EMP1	5374.26	1.92584	5.30523e-27
AC096564.1	10.9155	1.9249	0.00269827
ENPP7P4	5.15762	1.92168	0.0493516
WTIP	955.442	1.92076	2.31914e-24
VSIG1	26.362	1.9184	0.000795712
AL356515.1	15.8961	1.91794	0.00139988
GRIN3B	49.699	1.91778	2.00677e-11
MYEOV	22.2715	1.91746	0.00865431
THBS1	3896.64	1.91733	1.50688e-65
DBNDD2	498.514	1.91337	1.00969e-40
PVALB	24.0853	1.91273	0.000447084
DMKN	409.41	1.90565	8.6772e-36
SLC38A5	19.7359	1.90418	2.04987e-05
HES4	110.14	1.90324	1.9366e-11
NA	32.9901	1.90305	1.30827e-06
PCK2	6290.65	1.90301	4.70826e-14
PAWR	1395.93	1.90128	5.58159e-22
SLC7A11	1423.96	1.90043	0.000489944
SNCB	14.5795	1.90016	0.00317895
CACNA1H	127.756	1.89632	3.627e-10
MAMDC2	4343.62	1.89239	1.0687e-49
IL1B	73.1764	1.89161	4.04356e-06
AC142381.3	18.7741	1.89108	0.0047509
PRKG1-AS1	7.92208	1.8905	0.0134741
AC108463.2	15.8197	1.88897	0.00071317
TSHZ3	74.6706	1.88626	1.19141e-09
PXDC1	1898.91	1.88443	2.79889e-99
IGSF23	35.7386	1.88431	1.81116e-06
CRNN	18.6631	1.884	6.46742e-05
ARHGEF16	104.708	1.88164	3.17927e-16
PLAU	3831.11	1.879	1.95947e-34
AC105345.1	9.72568	1.87728	0.0258668
AC147067.1	13.411	1.87589	0.000887665
ADGRG3	68.617	1.87568	3.94852e-15
RIMKLA	73.2734	1.87558	1.50581e-06
ADTRP	17.7578	1.87552	0.000140953
FADS3	3833.39	1.87499	1.28583e-81
ALS2CL	852.731	1.87462	6.59793e-27
KCNK9	51.845	1.87409	1.06449e-09
ARLNC1	37.4712	1.872	2.00206e-06
C1orf198	2749.17	1.8718	1.0678e-127
AL161908.1	16.6827	1.87087	0.00188039
OTOA	11.5203	1.87065	0.0229222
HBEGF	861.644	1.86697	1.19211e-47
RAB33A	27.1866	1.86541	2.91425e-05
LINC01169	5.89855	1.86314	0.0322511
PKD1L2	885.888	1.86177	8.60716e-11
FAM129A	2074.6	1.86043	4.26921e-13
ANXA1	9614.09	1.86026	3.73382e-19
TM4SF19	104.744	1.85774	1.64075e-09
MMP24	326.471	1.8576	1.27906e-24
SDC4	4176.42	1.85689	8.79379e-40
GSG1	11.7543	1.85636	0.0132882
AC024475.4	21.4698	1.85625	2.83151e-05
CFAP57	85.9938	1.85556	3.43115e-06
MAFK	1886.64	1.8534	2.54718e-64
LUCAT1	124.736	1.85328	4.12189e-05
SDR42E1	246.939	1.85297	4.40046e-18
AC000078.1	21.0271	1.85278	6.53538e-06
AC011731.1	14.1937	1.84967	0.000940451
MACC1	8.87295	1.84935	0.0286966
FLJ45513	22.0443	1.84878	0.000405057
GAL3ST1	22.2304	1.84772	0.00031682
SLC3A2	10651.3	1.84707	1.10738e-14
AP000781.2	21.6091	1.84518	0.00866101
FAM131B	590.295	1.84474	9.64054e-41
VAV1	107.623	1.84455	1.49936e-11
AL121772.1	44.2697	1.84216	1.85922e-07
PPP1R14A	175.082	1.84208	5.501e-21
PVR	6076.55	1.84154	1.72804e-29
NA	17.7033	1.8403	0.00918524
CTH	928.961	1.83983	2.32362e-09
ERFE	143.521	1.8394	7.7908e-13
C19orf33	9.27119	1.83769	0.00810747
KCNH1	22.7283	1.83644	0.00112319
BEST1	300.967	1.83594	1.62333e-13
GAS6-AS1	6.04442	1.83543	0.039307
SOHLH1	91.9295	1.83341	1.4671e-16
ARNT2	978.215	1.83117	7.64987e-34
HES2	24.4761	1.82791	0.000331118
CYTH3	8882.57	1.82616	7.91397e-130
ANOS1	67.4139	1.82331	1.04573e-11
ABI3	137.217	1.823	2.53901e-13
DDIT3	1960.79	1.82277	1.71681e-05
JUN	2696.77	1.82127	7.09939e-21
SPANXB1	1009.09	1.82113	3.15868e-45
CFAP58	18.5412	1.82046	0.000393687
ANKRD33B	166.909	1.81744	1.77262e-20
LAYN	609.028	1.8149	2.52007e-29
KCNG1	1345.74	1.81083	4.49602e-16
FMNL1	1214.86	1.81051	5.37179e-60
PARP8	150.969	1.80964	3.33296e-14
COL13A1	1295.8	1.8078	2.21848e-35
KIAA1324	83.1375	1.80382	1.08768e-08
NUAK1	3145.05	1.80351	1.63935e-58
PRSS8	17.4747	1.80326	0.00343941
MCOLN2	40.1345	1.80173	5.04772e-05
VEGFA	2322.71	1.80103	3.55247e-11
PROSER2	428.443	1.79974	1.06597e-21
SLC7A1	3757.96	1.79888	3.42797e-21
IGF2	2046.49	1.79815	1.53673e-22
ATP2B3	7.38156	1.79625	0.0358745
CES3	106.624	1.79591	5.40116e-12
NKX2-2	22.5441	1.7955	2.32692e-05
AC060766.6	9.19009	1.79384	0.0127298
NIPAL4	209.045	1.79326	3.72055e-10
MAP3K20	5636.63	1.79274	1.80421e-35
PROC	45.9168	1.79125	8.96734e-07
FAM83G	1496.74	1.78977	1.18406e-44
RHCE	20.1289	1.7886	0.000428081
CSF3R	14.0933	1.78828	0.00315234
BNC1	1562.45	1.78705	3.0065e-18
EIF1AY	6.42646	1.78321	0.0475559
RPS6KA2	1707.93	1.78034	1.62831e-28
NA	310.897	1.78023	9.6642e-28
AL590399.4	12.3109	1.78005	0.0115101
MTHFD1L	2628.19	1.77901	4.19915e-31
AC004817.3	15.8235	1.77818	0.00985595
SHMT2	14299.5	1.77341	1.38876e-18
AC093799.1	7.91703	1.77324	0.0371592
SP8	10.2869	1.77296	0.0494381
FLNC	24286.4	1.7721	1.42945e-44
SIK1	154.214	1.77119	2.82289e-21
FBP2	5.93318	1.77085	0.0447378
TBX1	62.7332	1.76476	6.73415e-13
SLC1A4	2242.25	1.76455	1.26998e-14
VAT1	16525.2	1.76444	1.23331e-43
NEDD9	1801.1	1.76285	2.41155e-55
CES4A	56.3291	1.76275	2.37118e-10
CFD	50.6398	1.76225	1.12506e-07
LINC00900	27.3923	1.76119	0.0032137
GATA3	89.1028	1.75836	1.67762e-05
AC079328.2	12.0888	1.75757	0.0426906
HPSE	457.303	1.75696	1.05426e-44
CAMK2B	19.4202	1.7558	0.00398122
AC009108.3	8.62464	1.75465	0.0162334
ME3	73.9769	1.75403	1.75925e-07
AP001057.1	8.75176	1.75388	0.0111154
AL365181.2	32.2909	1.75138	1.50829e-06
TMEM45B	21.7712	1.74998	0.000456391
ADRB1	31.5158	1.74918	5.13082e-06
SRMS	9.88297	1.74716	0.0149221
IRF8	69.1721	1.74594	2.07372e-06
RAB11FIP1	3684.57	1.74577	2.2834e-76
BMP6	286.693	1.74423	3.24936e-12
RAB3B	2500.74	1.74317	3.86061e-63
PDLIM1	4528.31	1.74314	6.26509e-54
BICDL1	37.5426	1.74208	0.00138833
VIP	7.7605	1.73502	0.0242453
LRRC15	26.2921	1.735	0.0307972
AL139352.1	15.4139	1.73412	0.00216675
TMEM71	20.6512	1.73382	0.012567
ESRG	287.451	1.73365	1.70399e-17
NMNAT2	86.6377	1.73294	5.41945e-08
MINAR2	11.9647	1.73279	0.0260301
NA	24.8512	1.73223	0.000245741
CITED4	281.977	1.73135	1.25546e-17
TREML2	26.0847	1.73087	3.19866e-05
TTBK1	13.0262	1.7306	0.00671011
ATP6V1B1-AS1	56.9122	1.73025	6.37368e-08
RUSC2	2608.47	1.73012	4.61923e-100
HOXC13-AS	178.564	1.72627	1.15568e-13
C2CD3	3048.9	1.72615	1.20333e-88
QRFPR	70.0696	1.72563	2.08836e-07
AC099518.6	18.7102	1.72386	0.00071536
JPH2	828.929	1.72373	8.38621e-23
PHGDH	8589.26	1.72317	7.27942e-31
NA	39.8803	1.72271	1.25727e-07
UPP1	3542.44	1.72268	1.47913e-17
SHD	7.26699	1.72185	0.0429531
LINC00211	14.1691	1.72093	0.000921148
TPM1-AS	112.92	1.71733	1.26491e-05
CDK15	14.0408	1.71672	0.0229586
PTH1R	160.129	1.71376	5.74435e-16
AC069528.2	12.1933	1.71254	0.00842993
DENND1C	82.5299	1.71031	2.15187e-11
LMO7	2495.33	1.70794	8.95736e-22
CACNA2D4	7.94606	1.70631	0.0409477
NFE2L3	4016.43	1.7048	1.8865e-54
NMT2	1496.88	1.70073	4.86439e-95
ELF3	19.1928	1.69927	0.00403031
LINC01836	94.1276	1.69926	7.24992e-15
ZFP42	83.9506	1.69875	6.55319e-11
AC008514.1	9.82279	1.69875	0.0390148
AL136962.1	29.1456	1.69743	0.00981963
ACTN4	24964.7	1.69671	1.96911e-61
PTPN6	55.8165	1.69533	2.70513e-07
UCP2	2547.83	1.69513	8.54049e-61
VLDLR	1352.48	1.69457	6.06535e-71
MEGF11	58.0267	1.69425	2.59186e-05
OR7E122P	9.01156	1.69377	0.0176626
LINC01168	12.8281	1.69184	0.0038831
GAD1	53.2255	1.69119	6.19278e-09
LINC02561	10.7771	1.69023	0.0176815
LINC00632	86.5282	1.68989	1.83376e-10
NECAB2	101.487	1.68733	3.61345e-09
MYOF	15695.7	1.68621	1.44817e-41
LINC00051	15.4732	1.68531	0.000621207
SH3BP4	4262.93	1.68501	8.64488e-64
SLC5A5	18.7602	1.6838	0.00464268
AL162727.1	20.9042	1.68305	0.00143376
AC104024.2	12.7444	1.68299	0.0163881
AC092490.1	224.832	1.68246	7.86963e-28
CALHM6	28.5683	1.67988	6.16707e-05
IL2RG	101.376	1.67878	1.01795e-09
NAT16	35.3965	1.67752	0.00505826
C1QTNF1	954.112	1.67573	2.39605e-31
TCAF2P1	28.1711	1.67558	0.00215694
WNT9A	123.586	1.67515	1.10844e-13
COL12A1	7146.72	1.66992	1.10681e-35
GABRR2	34.62	1.66964	0.00143376
LOXL4	806.099	1.66902	8.00561e-39
KCNK15	31.2411	1.66785	6.09692e-06
ANXA8	20.8444	1.66743	0.000654549
SSX4	18.605	1.66722	0.00188384
SAMD7	13.891	1.6672	0.00577131
GALNT8	42.4141	1.66713	5.74343e-05
AC084759.3	23.8126	1.6649	0.000234769
LINP1	60.8799	1.6639	3.47357e-09
LINC02133	8.74714	1.66384	0.0287399
PLCXD2	49.071	1.66367	7.84526e-07
ITPK1	2503.19	1.6625	5.71177e-50
AC080023.1	19.5669	1.66201	0.000107355
TMC5	49.8823	1.66123	0.00357672
FOXO6	98.3004	1.66054	1.63298e-13
AL049650.1	34.4112	1.65952	0.000260583
PKP2	1275.45	1.65941	1.10059e-54
BIK	12.2774	1.65333	0.00755243
MTHFD2	8169.23	1.65233	9.5525e-17
LINC01356	69.318	1.65146	4.53261e-08
NNMT	7823.23	1.65017	7.45908e-18
AL358473.1	37.4331	1.64992	3.13521e-06
LINC01219	18.9168	1.64949	0.00038932
SSR3	5937.32	1.64929	2.99304e-109
CARMIL2	174.298	1.64872	7.38327e-08
AP002957.1	37.6114	1.6467	1.20441e-05
NOXA1	57.9164	1.64093	4.32703e-07
TRBV12-4	14.2221	1.64048	0.033794
AC117402.1	30.0251	1.64002	3.40309e-07
RAB32	1770.46	1.63547	3.08164e-39
LINC01133	24.0646	1.63273	0.0423226
SGK2	13.7795	1.63259	0.0120924
NPTX2	1549.75	1.62944	1.18138e-21
BACE2	2559.99	1.62916	6.42155e-39
P3H2-AS1	15.1096	1.62846	0.00325974
AC092667.1	12.3452	1.62768	0.00916063
NR2F2-AS1	143.335	1.6241	1.75779e-14
CLIC3	15.9698	1.62287	0.0209126
SPTB	236.361	1.62273	7.17863e-09
UQCRHL	16.3702	1.62107	0.00326421
FOXA2	107.311	1.61966	1.59945e-10
PTK6	8.94613	1.61813	0.0446207
LPAR1	468.041	1.61778	6.58901e-24
KLK1	68.0157	1.6168	2.81265e-12
CD99P1	133.577	1.61583	7.28809e-15
CPZ	462.722	1.61558	4.96604e-13
CHMP4C	55.1236	1.61546	9.68747e-06
NF2	3616.9	1.61486	6.41456e-55
MAP7D3	5669.03	1.61365	4.28776e-39
LINC01600	10.4632	1.60992	0.0297422
KCNS3	13.085	1.6096	0.0452719
LINC02547	19.272	1.60755	0.000274488
UAP1	2438.45	1.60749	2.87729e-41
LINC01405	15.0122	1.60705	0.00477885
AL442125.2	11.4023	1.6043	0.00471126
AC100803.2	22.4086	1.60282	0.00209458
TMEM225B	15.7991	1.60221	0.00290516
AL158069.1	22.1277	1.60009	0.00139534
AC092437.1	11.4938	1.59955	0.0087316
PEA15	12565.6	1.59925	4.27253e-34
FAM155B	469.104	1.59861	5.77214e-43
CTPS1	4664.98	1.59839	5.64077e-49
PDCD1LG2	137.941	1.59767	7.36295e-10
MAP6	112.028	1.59623	5.36972e-08
SERTAD4-AS1	147.69	1.59552	3.17645e-19
ADRB2	262.226	1.59317	1.45119e-27
TRIM58	392.492	1.59148	1.03544e-28
KLK6	11.4629	1.59111	0.00612436
NANOS3	11.0993	1.59086	0.0123029
ERICH2	16.0875	1.59051	0.0280699
LIPH	201.11	1.58682	1.30826e-14
AC005381.1	14.5691	1.58656	0.0255329
PAGE1	358.445	1.58465	2.6991e-24
RBMS2	4001.84	1.58425	2.07134e-79
ELMOD1	26.2617	1.58068	0.0192753
AL451042.2	26.7035	1.57944	3.69258e-05
FAM131C	149.591	1.57831	1.42673e-12
AC106744.1	14.945	1.57812	0.0124549
MICAL2	7480.93	1.57697	5.89253e-33
TNFRSF8	76.0142	1.57265	2.18068e-14
NXPH4	627.438	1.57236	1.5325e-23
C19orf81	35.8847	1.56873	7.53504e-05
PHLDA2	934.065	1.56831	5.04862e-22
MOCOS	902.934	1.56751	9.89736e-11
ADRA2C	237.924	1.56616	2.3188e-20
C1orf116	44.6847	1.56501	7.92217e-07
GOLGA7B	57.1699	1.56412	9.89321e-06
NABP1	2078.39	1.56352	2.44874e-18
AL357033.1	14.6626	1.56328	0.00427654
LYPD1	36.7651	1.56181	0.000112134
AC007040.2	54.201	1.56143	1.56309e-06
KLF4	330.165	1.56021	7.4154e-08
AL096865.1	40.0395	1.56009	2.73489e-06
AC073365.1	60.7179	1.55796	1.35823e-11
AC117500.3	30.0994	1.55609	0.0119904
NA	21.7502	1.55587	0.000509096
SLC45A2	191.819	1.55534	6.50794e-12
ITGA3	22276.6	1.55481	2.30172e-52
SPINT1	91.074	1.55435	4.65299e-07
AL450405.1	9.95669	1.55319	0.0447049
LINC01119	98.2556	1.5515	4.23962e-09
TRIM7	166.752	1.54962	1.09241e-21
RUBCNL	166	1.54826	1.09402e-06
AC092645.1	38.5495	1.54812	0.00346034
NUAK2	210.064	1.54761	1.89779e-22
AC016687.3	39.0356	1.54629	0.000129677
PPP1R13L	292.553	1.5452	7.80091e-19
DKK1	937.757	1.54436	5.00935e-17
FAM71F1	16.9044	1.54396	0.00527284
KCNK6	269.045	1.54383	1.81912e-31
GIT1	3699.95	1.54336	9.01029e-85
CRADD	389.304	1.54272	4.95385e-46
AL031728.1	20.1215	1.54233	0.000899628
IL12A	40.2715	1.54135	2.13256e-06
GAS5	7842.95	1.54043	1.31332e-23
GCSAM	14.9224	1.53745	0.0149282
VWF	121.57	1.53635	2.50654e-06
PCMTD1P2	10.2432	1.53557	0.033838
CEBPG	1838.69	1.53502	6.41963e-09
AC090358.1	11.9919	1.53497	0.0265772
METRNL	538.626	1.53357	1.74036e-23
TUBA3C	15.7033	1.53292	0.0349041
AC002401.4	17.6067	1.53278	0.0143023
LINC02381	568.293	1.53274	6.6388e-39
LINC00173	18.4551	1.53255	0.0140591
EPHA2	5020.24	1.5307	5.23195e-38
AC073130.2	9.8782	1.52982	0.0458849
FAM107A	21.234	1.52958	0.00251837
GLS2	26.6486	1.52909	0.00361187
KLF2	119.591	1.52881	1.53482e-11
DLL4	11.3502	1.52872	0.0127367
CPNE7	438.107	1.52842	3.85705e-21
KCNF1	83.962	1.52671	1.84723e-06
CRYBA2	26.6879	1.52658	7.0474e-05
TIE1	3876.16	1.52644	2.33404e-34
USP43	231.423	1.52497	2.82378e-18
PIM3	1569.13	1.52375	1.0162e-70
EZR	9411.26	1.52242	4.9047e-73
AC116021.1	33.8885	1.52187	0.00010102
SHANK1	153.55	1.52182	1.19466e-09
DUOXA1	48.4129	1.52179	8.88327e-05
WAS	120.581	1.52122	6.52362e-18
XDH	47.8668	1.52116	0.000619089
FAM167A	682.861	1.52073	9.82186e-12
ANGPT4	46.2043	1.51788	8.91933e-07
AC009264.1	24.1779	1.5151	0.00271328
ADAMTS1	240.342	1.51485	8.10213e-08
AC093673.1	597.931	1.51429	3.12837e-34
CDC42EP1	3906.3	1.51361	9.86608e-17
SLC6A15	394.491	1.51346	2.00689e-09
TPM1	23789.7	1.51267	1.54902e-45
CHST3	1381.8	1.51217	9.91906e-48
CEACAM5	17.623	1.51193	0.00239954
CBLN1	8.85646	1.5109	0.0429551
BST1	122.71	1.51062	1.06952e-08
LINC01357	79.302	1.50946	1.55038e-10
WWC2	2643.32	1.50945	1.27831e-17
AC129492.4	81.8909	1.5084	0.000890459
CCK	19.1042	1.50837	0.00699422
AC245595.1	457.825	1.50827	7.1982e-27
GABARAPL1	3444.55	1.50775	1.79147e-63
B3GALT5	20.1189	1.50757	0.0288379
LRRC20	1074.13	1.50685	6.1766e-22
GFPT2	1047.08	1.50682	9.61358e-23
OR51B4	93.625	1.50641	2.89706e-10
RTBDN	28.103	1.50549	0.00012033
SYTL5	146.997	1.5036	4.76628e-05
BCL2L1	5620.75	1.50233	7.26397e-74
PPP1R1C	18.8154	1.5023	0.0021318
LMX1B	158.128	1.50098	3.70178e-11
PODXL	5988.65	1.50043	2.40769e-25
TMEM255B	84.9166	1.50001	0.000125627
C10orf55	41.4533	1.49991	0.00012033
RCAN1	3868.5	1.49847	3.89236e-30
PIK3CD	607.321	1.49571	1.04097e-19
SH2D3C	192.603	1.49561	1.32066e-08
CACNG6	238.432	1.49508	3.73323e-13
C22orf34	161.504	1.49423	6.08436e-16
ACOXL	37.1857	1.49226	0.000455128
CD9	3271.15	1.49184	2.80149e-22
NA	440.365	1.49084	4.15377e-20
CHRD	56.1711	1.49083	0.000107269
DUX4	10.4608	1.48786	0.0229909
CASS4	18.8004	1.48777	0.00347059
KLF15	216.436	1.48753	5.51002e-08
SLC22A15	397.329	1.48704	1.1711e-05
RASIP1	167.146	1.48668	9.18266e-09
CEBPA	131.398	1.48455	3.03222e-10
WWC3	2266.24	1.48416	9.20946e-33
AC005336.2	28.788	1.48334	0.000523838
CCNB3	41.4025	1.48333	0.00120266
PGM5P2	53.126	1.48327	1.3875e-08
TTC9	226.534	1.48282	8.52301e-14
CACNA1I	43.8467	1.48055	0.000119914
ZNF469	430.187	1.47823	2.83196e-14
RPS6KL1	347.993	1.47718	1.05644e-16
ITPR3	5904.79	1.47556	8.87484e-55
FOXC2	196.882	1.47537	9.31806e-11
AC243964.3	235.824	1.47105	1.85984e-18
FIBCD1	129.113	1.46915	2.55113e-08
PSD2	18.5588	1.46876	0.00336303
CLEC4M	17.5232	1.46824	0.0187003
AC015819.1	10.6042	1.46674	0.0435818
UBE2QL1	493.862	1.46577	1.33583e-16
ALMS1-IT1	18.7055	1.46535	0.00423994
PFKP	5727.14	1.46419	9.38109e-46
AC099568.2	26.2569	1.45915	0.00787257
NA	42.1347	1.45849	5.56693e-07
AC016251.1	9.22033	1.458	0.0444513
ANG	121.023	1.4572	1.73409e-09
NA	23.5932	1.45289	0.00310935
AC226118.1	19.5282	1.45276	0.00505807
TUBB6	6630.39	1.45185	2.32491e-19
KCTD19	164.137	1.45089	2.686e-11
GPC4	272.305	1.45049	1.17005e-10
FERMT3	650.085	1.45047	1.22009e-32
DYSF	2529.15	1.45025	3.00227e-25
SH3TC1	1122.41	1.44926	1.13951e-10
FLNA	161615	1.44841	4.76765e-61
AC145124.1	226.683	1.44705	4.29543e-26
DGAT2L7P	9.13398	1.44613	0.0415264
HABP4	1578.11	1.44476	9.86657e-73
PAX7	19.0367	1.44465	0.0087895
PTPRH	506.608	1.44366	4.30842e-07
AC239859.6	53.287	1.44333	1.69002e-08
SARS	9946.6	1.44261	1.71135e-23
AC069209.1	17.5623	1.44069	0.00885124
ETS1	13708.9	1.44048	3.46266e-84
KIF1A	33.0877	1.43969	0.00642182
HKDC1	536.458	1.43923	3.74467e-09
CYP27B1	66.5198	1.43901	1.8227e-05
EIF4EBP1	6024.26	1.43588	1.91432e-19
AC124067.2	159.435	1.43553	7.6142e-12
TMEM40	73.2242	1.4348	7.93879e-05
ADAMTS6	290.362	1.43455	5.97764e-17
FENDRR	1374.19	1.43406	2.52513e-16
CHURC1-FNTB	112.045	1.43388	0.00118769
SLC8B1	1452.1	1.43344	7.98126e-31
PTCH1	1620.68	1.43298	6.52362e-18
LINC00316	15.3705	1.43229	0.027462
HIST1H2BJ	99.3783	1.43182	3.76193e-11
VGF	785.821	1.42823	1.91792e-12
CDCP1	1149.15	1.42752	3.08944e-23
CXCL14	171.486	1.42747	3.5612e-05
EBF2	15.1697	1.42681	0.0145199
MYLK	2007.99	1.42647	4.22261e-20
ZMAT1	38.3723	1.42573	0.000464351
MESP1	46.7446	1.42543	1.52648e-05
LINC01647	23.7419	1.42343	0.00397665
WFDC3	25.0033	1.42342	0.00471987
FRMD5	262.635	1.42335	2.43951e-17
BAIAP2L1	1835.62	1.42285	2.18329e-51
ANO4	74.032	1.41973	2.66205e-06
ARL4C	1081.7	1.41861	1.3727e-24
NTRK1	102.252	1.41778	7.53047e-13
MYT1	13.7928	1.4175	0.0254724
BOK	3337.7	1.41297	4.32388e-21
PLAC9P1	16.6922	1.41208	0.00796982
CARS	10244.2	1.41103	2.71684e-57
ARL4A	624.351	1.40805	7.4384e-23
VEPH1	23.6186	1.40756	0.0225209
SPANXA2-OT1	50.2078	1.40648	0.000175889
CCDC85C	2884.1	1.40644	2.52485e-29
NA	29.326	1.40226	0.00384207
SPATA21	20.5035	1.39977	0.0149968
PIK3R5	80.6138	1.39629	3.44779e-09
GNB1L	130.784	1.39629	1.39526e-11
OXCT2	18.4682	1.39537	0.0235104
DENND2A	3519.22	1.39483	7.79201e-28
KCNJ4	60.1092	1.39414	2.01887e-06
CCL26	75.1511	1.39146	2.25675e-05
CGN	277.55	1.39085	1.75829e-09
ADORA2B	805.83	1.39053	3.34766e-31
DNAH5	297.436	1.38938	2.39675e-20
CCRL2	23.251	1.3877	0.00670944
DPY19L2P5	27.4356	1.38716	0.000691407
CTIF	3415.14	1.38491	4.58608e-29
SIGLEC14	107.307	1.38414	2.20136e-06
SUGT1P1	47.6038	1.38362	3.32609e-05
YBX3	3730.36	1.38292	7.9239e-92
HAR1A	46.3807	1.38255	0.00016028
MAP3K21	160.683	1.37892	1.11526e-09
KCNS1	313.868	1.3784	8.31855e-13
AC138150.2	38.5432	1.37788	0.000642994
DNAH10OS	45.6418	1.37772	0.000154347
LINC02525	15.8636	1.37752	0.0137364
XBP1	4964.53	1.37667	3.74825e-45
OVAAL	29.5513	1.37543	9.14028e-05
PRDM12	12.2049	1.37488	0.0310845
BRSK2	130.153	1.37468	1.8816e-05
LINC00629	15.332	1.37388	0.0167317
MYC	932.684	1.37313	3.67099e-06
AC010327.3	10.0238	1.37296	0.0481703
MTMR10	1017.93	1.37275	4.89561e-37
KRT8P33	61.6269	1.37261	1.39873e-07
AC138811.2	44.9437	1.37228	0.00420688
ARID3B	403.876	1.37226	3.0577e-22
AC092687.3	14.5632	1.37207	0.0105402
SUSD3	356.027	1.37206	5.13777e-15
SLC16A3	3928.1	1.3717	2.80628e-32
WARS	18975.3	1.37025	3.59964e-12
PKP1	27.4733	1.36751	0.000870282
DOCK2	1547.34	1.36734	2.99363e-19
CD1D	791.208	1.36649	7.62811e-21
ETHE1	1360.29	1.36604	2.34776e-39
AC099548.2	253.668	1.36557	6.07547e-07
MYO1E	3124.76	1.36417	1.05e-33
NLRP12	80.4694	1.36409	0.000282684
RRAD	54.8246	1.36334	0.000120094
UPK1A-AS1	54.354	1.36278	0.00340925
AC099489.1	53.337	1.36105	0.00161689
SCGB3A2	67.3265	1.36029	0.000137193
SCARF2	1756.21	1.35978	4.53199e-68
CACNA2D3	94.7036	1.35824	1.8096e-06
PRDX6	12970	1.35458	3.15144e-29
CFLAR-AS1	19.0142	1.35371	0.00884524
IL18	12.8675	1.35344	0.0492239
DENND3	1469.52	1.35242	1.20471e-43
LUARIS	40.9259	1.35186	0.00284407
NUPR1	3841.86	1.34983	0.000122686
AC009055.2	28.2434	1.34613	0.0211341
SLC13A5	229.875	1.34562	6.29241e-08
N4BP3	111.414	1.34507	6.56e-09
ATP1A3	357.023	1.3449	5.81432e-08
SYNE3	2045.7	1.34382	8.44554e-32
AP000446.1	357.059	1.34319	2.5085e-15
RELB	233.185	1.34294	4.13843e-06
NEDD4L	4687.22	1.3415	1.22491e-43
DLGAP1-AS5	26.9492	1.34138	0.0112336
LIF	154.155	1.3413	5.8618e-06
PCID2	2143.24	1.34116	1.6479e-67
HLA-DQA1	47.1958	1.34036	0.00213185
GUCA1B	26.5596	1.33824	0.000142777
MMP23B	44.9577	1.33757	0.00578698
ARL4D	533.065	1.33702	1.01863e-14
ZFAS1	5020.05	1.33594	4.28139e-15
AC117500.5	24.7226	1.33373	0.0466618
BATF3	241.641	1.33311	8.39177e-16
SERP2	73.9891	1.33189	1.0974e-07
TGIF2-RAB5IF	109.123	1.33183	3.57797e-05
AL390719.1	186.234	1.32988	6.3201e-13
WDR66	107.177	1.32712	0.000153412
MAMLD1	1047.31	1.32655	1.25056e-15
SLFNL1	51.8326	1.32301	2.98908e-05
AZGP1	71.0359	1.32288	7.04821e-05
AC005736.1	74.5968	1.32252	1.95953e-06
AC073585.1	61.6612	1.3224	6.3251e-06
PRSS3	32.7351	1.32213	0.000780595
HLA-V	43.9351	1.31872	0.0051332
MPP5	2731.6	1.3167	1.05313e-19
RASAL3	65.5795	1.31664	9.47753e-07
SEMA3F	497.659	1.31648	1.09601e-23
NOCT	193.321	1.31597	4.44097e-13
HES7	61.4483	1.31464	2.38695e-06
AL139289.2	61.6503	1.31437	6.40798e-06
TMEM183B	23.2306	1.31428	0.0471815
LINC01611	16.0922	1.31247	0.0129877
HHLA1	19.1567	1.31031	0.0229751
NOTCH1	1196.39	1.30942	6.05787e-26
PPM1J	142.195	1.30912	1.61294e-09
DOP1B	559.071	1.30736	2.62529e-09
NT5M	308.331	1.30665	3.39072e-16
CACNA1B	179.537	1.30566	6.93421e-08
DCT	247.329	1.30472	6.48481e-09
LIN28A	640.034	1.30415	6.36614e-21
AC097652.1	33.6881	1.30368	0.00014097
AHNAK2	1587.71	1.30293	2.54147e-14
GARS	17460.1	1.30281	3.86478e-14
LINC02256	15.4711	1.30145	0.0282963
TEAD4	1502.04	1.30106	1.2571e-38
IL6R	802.327	1.3007	2.12114e-16
FBXL16	218.731	1.30058	9.27436e-05
CD44	26250	1.29984	1.78976e-30
FAM189A2	29.5952	1.29898	0.00937791
TSC22D2	1341.34	1.2986	6.06786e-22
TMPRSS3	63.8542	1.29765	0.000880198
AC090617.9	15.7888	1.29728	0.01326
LCN10	13.6595	1.29697	0.0212824
LINC01730	59.1221	1.29642	0.00051311
NBEAP3	75.2649	1.29229	4.893e-08
FSTL3	2216.42	1.29129	1.2035e-12
PIK3R6	45.7568	1.29116	5.83239e-05
HS3ST3A1	154.944	1.29018	4.39488e-11
ACTBL2	62.3757	1.2889	0.000717019
HEG1	10780.5	1.28882	6.37037e-68
ACTN1	17677.7	1.28833	2.8697e-55
AARS	23738.4	1.28769	1.77472e-15
PAQR5	477.013	1.28735	2.26531e-10
LINC00623	78.4135	1.28601	0.00079504
F11R	1874.63	1.285	1.55352e-15
CCND1	9113.41	1.28483	1.47758e-18
FBLN5	552.294	1.28459	2.15602e-07
DUX4L26	66.0098	1.28395	4.30147e-07
LINC02495	16.8131	1.28312	0.0161516
LINC01503	111.752	1.28293	2.66085e-11
BEX5	103.9	1.28281	8.37735e-08
ATP8B3	1210.26	1.28196	1.84295e-32
LY96	154.518	1.28141	3.16376e-07
CHRM4	157.72	1.28102	6.22836e-09
SOX30	17.5379	1.28058	0.0207917
SMCO4	160.016	1.28048	1.96101e-05
ERCC2	3374.31	1.28041	9.26003e-30
AC092111.1	85.9771	1.28017	4.86818e-09
AL353807.3	42.6629	1.28007	0.000110342
EBI3	130.714	1.27999	5.17033e-07
C4orf19	21.1647	1.27827	0.0125292
SHB	1465.47	1.27763	4.32068e-18
QSOX1	8378.69	1.27512	1.06911e-35
DSP	1365.6	1.27347	6.49687e-27
POLRMTP1	27.847	1.27305	0.00288289
LINC01721	15.2378	1.273	0.0386296
AC104129.1	41.0341	1.27257	0.0081975
SORBS2	136.345	1.27193	4.46843e-05
LINC02577	30.0478	1.27186	0.00297801
AC022784.1	65.506	1.27039	0.000155446
OPN3	842.165	1.26922	3.92266e-27
CHRFAM7A	55.5674	1.26893	0.000213785
EIF3CL	2513.1	1.26817	0.00024625
UBASH3B	966.822	1.26785	5.09238e-10
HERC3	716.055	1.26677	8.64708e-06
EYA2	133.823	1.26581	2.26947e-10
AC108463.1	17.9547	1.2651	0.013886
LINC01094	30.0002	1.26477	0.00107677
BHLHE41	332.202	1.26236	8.41723e-05
LACTB	732.05	1.26234	2.55257e-22
FAM85B	19.2352	1.26191	0.00305687
CLIP4	1736.45	1.26121	2.45322e-10
ANXA2P2	38.6885	1.26039	0.00139048
C3	235.961	1.2579	1.43637e-05
MIR4527HG	177.578	1.25774	9.90276e-16
TMED10P2	29.8009	1.25762	0.00154847
KCNN4	521.334	1.25712	1.12188e-13
ULBP1	1094.42	1.25646	1.64667e-10
STX3	2995.09	1.25612	3.40179e-44
LARP1B	467.278	1.25543	2.17054e-12
TXNRD2	1698.66	1.25333	8.6772e-36
STARD13-AS	15.3575	1.2528	0.0475546
LINC02298	64.2872	1.25249	4.44102e-06
ACSM5	100.295	1.252	2.63915e-06
CAMSAP3	101.49	1.25198	5.71674e-05
CCM2L	68.8057	1.25198	0.000567779
DDAH1	3716.23	1.25146	2.20536e-19
AL391056.1	11.4357	1.25081	0.0433445
LINC00941	153.583	1.25019	3.33053e-11
IARS	24186.3	1.2497	2.14248e-21
ADGRG1	794.478	1.24934	3.61321e-06
NA	40.0837	1.24878	0.000741819
AP002956.1	14354.4	1.24603	1.72957e-21
KLHL5	3640.73	1.24316	2.65383e-17
MTSS1L	4140.21	1.24283	5.38529e-32
IZUMO1	20.4604	1.24149	0.0479722
KIFC3	5432.51	1.23922	6.3462e-36
PTTG1IP	16185.7	1.23877	2.40228e-33
BCAN	87.5817	1.23862	2.5075e-06
SCARF1	287.336	1.23797	2.71247e-10
LCMT1-AS2	33.1562	1.23786	0.0178867
COLGALT2	105.748	1.23745	4.91479e-08
TUBA1C	18892.8	1.23696	2.47646e-14
EFR3B	66.2786	1.23651	0.000127787
SERPINE2	8188.67	1.23623	8.30669e-30
RBAKDN	14.8972	1.23489	0.0377058
AC012368.1	55.0785	1.2347	4.21921e-05
CAPN2	11550.4	1.23314	6.59123e-26
AC021106.1	31.707	1.23254	8.61941e-05
FGFR4	381.567	1.23154	3.61926e-07
WNK4	1114.05	1.2301	6.99312e-20
AC006252.1	66.2063	1.2295	0.000140762
GOT1	2517.09	1.22696	5.29222e-15
KRT18P41	21.5774	1.22668	0.00347406
PARD3B	69.0579	1.2261	0.00556084
MELTF	431.33	1.22438	7.37683e-11
ASPDH	17.1232	1.22365	0.0461308
PVT1	340.497	1.22346	1.00774e-08
ACSBG1	82.4158	1.22338	0.000832561
TFPI2	2830.25	1.22227	1.15841e-20
PLS3-AS1	36.4511	1.22133	0.00113241
GALNT15	66.943	1.22105	0.00254726
PYGB	11837.4	1.22103	2.37256e-51
TRNP1	1601.23	1.21903	2.15708e-17
CALM2	26395.3	1.21832	1.75918e-40
SLC45A3	519.912	1.21617	4.25116e-35
TDRKH-AS1	27.6724	1.21587	0.0324296
C6orf48	7131.06	1.21579	7.96092e-42
BLK	325.341	1.2155	3.41279e-09
CBX7	937.613	1.21529	3.80242e-16
HCFC1R1	2331.03	1.21511	2.48448e-12
AL512785.2	18.6598	1.21329	0.0326623
SPANXD	336.217	1.21325	1.91192e-07
PLEKHN1	170.643	1.21198	1.32698e-10
ARID3A	498.01	1.2114	3.82312e-13
AC015912.3	21.0235	1.21084	0.0065479
SESN2	1594.17	1.21077	1.65155e-05
CITED2	3299.68	1.20991	9.61996e-15
PM20D2	1660.57	1.20903	4.64357e-19
GSDME	2169.26	1.20824	1.32376e-23
SAMD4A	2581.58	1.20755	1.79779e-21
SOCS2-AS1	244.308	1.20609	1.06593e-07
SH3GL3	111.995	1.20489	0.00012016
GDPD5	1564.67	1.20446	4.97923e-19
CEBPB	1453.56	1.20423	7.75865e-07
EXT1	6550.5	1.20375	1.28869e-21
AC125611.3	1591.78	1.20335	1.26673e-12
SV2B	97.5149	1.20313	0.048244
RASD2	211.464	1.20266	7.842e-17
DPYSL4	506.489	1.20181	9.05622e-10
AC017104.1	30.5904	1.20155	0.000799826
SPANXC	1478.43	1.20025	2.62529e-09
SLC30A2	14.2998	1.19984	0.0476582
WNT3	343.029	1.19974	1.96704e-15
LONP1	5588.88	1.19952	1.40695e-33
NME1-NME2	345.927	1.19695	4.64973e-07
MYADM	3260.6	1.19627	1.60287e-25
NOS2	73.8586	1.19574	2.47544e-05
TNFSF15	89.0339	1.19509	0.000229856
AC092692.1	32.9436	1.19497	0.000163511
PRKCQ	27.5552	1.19491	0.00152321
ARHGEF18	3169.61	1.19368	2.96413e-30
MMP19	140.861	1.19328	4.20423e-05
NR4A1	297.178	1.19311	1.49405e-14
F7	60.9953	1.19309	0.000109993
AIF1L	1935.23	1.19244	2.45697e-19
AK5	674.352	1.19106	6.87518e-12
ATF4	18601.2	1.18878	2.83918e-33
ADAMTS18	25.1879	1.18801	0.0457691
SLC2A3	3270.07	1.18789	2.27521e-07
SLC2A1	3250.84	1.18788	3.49528e-19
CXCL1	30.0472	1.18657	0.0369819
PANX2	146.588	1.18485	1.00445e-07
ZNF385C	35.7694	1.18396	0.00296261
NTSR1	30.5016	1.18332	0.000828131
AL161729.1	72.3747	1.18313	1.59758e-06
FBLN7	185.287	1.18308	1.25831e-08
EBNA1BP2	5155.5	1.18217	4.70743e-35
FGFRL1	1762.38	1.18179	7.36706e-30
ARHGAP30	309.694	1.18103	2.20415e-12
PGRMC2	2270.37	1.18049	3.15364e-80
HOXB9	2074.17	1.18038	1.34854e-16
ZC3H12A	238.228	1.18035	3.15165e-08
GOLGA8S	17.9481	1.1795	0.02227
C12orf75	2759.52	1.1772	6.00659e-36
FOXF1	786.625	1.17557	7.6236e-12
TRHDE	434.288	1.17499	0.000521497
BEX1	1622.38	1.17371	2.55279e-23
CCDC9B	1980.08	1.17345	7.33987e-15
AC019080.5	19.9372	1.17252	0.0167633
ITGB1-DT	24.6401	1.17233	0.0123461
CARD10	1474.57	1.17179	7.00617e-14
HHAT	280.182	1.17077	1.44773e-18
GPT2	3740.35	1.17051	1.48905e-07
NFIX	4322.55	1.1691	1.91915e-34
POU4F1	102.581	1.16853	2.06746e-07
PDE6A	35.9032	1.16746	0.00126127
SERTAD2	1650.9	1.16589	4.88432e-28
PPP1R26	2889.95	1.16527	5.5201e-33
FZD2	1127.5	1.16513	3.73382e-19
LMCD1	1289.05	1.16422	1.18245e-06
CHST13	38.5541	1.16415	0.00140087
YARS	12806	1.16371	1.55192e-18
GFI1	39.2407	1.16307	0.0178463
HR	283.121	1.16126	0.00125272
CNN2	8063.88	1.16076	1.10633e-38
TNNI3	204.98	1.1607	2.83765e-10
CAVIN1	22717.4	1.16028	2.04881e-18
SLC22A18AS	118.35	1.16021	1.8579e-05
PSORS1C1	40.7172	1.15968	0.0134146
CEACAM19	174.75	1.1595	1.6717e-08
SDR16C5	42.3869	1.15861	0.0098666
TIMP3	33487.4	1.1575	1.57153e-15
SOWAHD	24.4747	1.15722	0.00444422
AL163195.2	16.1395	1.15694	0.039828
MID1	1581.45	1.15693	2.39622e-23
AC104435.2	31.5696	1.15515	0.0039058
CDH2	355.868	1.15504	5.74671e-08
TMEM151A	32.3752	1.15497	0.0189989
STEAP3	2478.21	1.1548	7.75538e-24
DHRS2	1627.92	1.15373	1.93585e-05
C16orf95	250.612	1.15337	2.12541e-10
ASMTL	1137.64	1.1532	6.50552e-27
P3H2	6277.97	1.15277	1.6905e-18
SLC8A1	552.676	1.15117	2.12913e-08
FOXF2	394.49	1.15112	1.56814e-23
NRARP	134.61	1.15072	7.92992e-09
SMS	6603.49	1.15032	2.24934e-26
AHNAK	122265	1.14908	3.92689e-42
SPN	423.472	1.14896	1.50574e-09
VSIR	1076.14	1.14768	6.42134e-13
AC125807.2	800.769	1.14715	1.55116e-23
NBEAL2	1699.57	1.14672	1.29831e-17
KLF16	371.828	1.14624	3.43229e-11
LSP1P4	1758.04	1.14534	2.60255e-37
MYH14	1638.04	1.14383	1.40027e-29
NOTUM	82.3267	1.14376	5.18455e-05
PKP3	138.05	1.14339	0.000492207
SEMA4A	163.42	1.14266	6.96715e-06
SNCAIP	91.6125	1.14151	9.17764e-06
PCED1B	73.6897	1.14061	0.00017777
ACO1	6073.14	1.13964	3.04353e-37
SLC1A5	12852	1.13899	3.15183e-12
RGS9	137.352	1.13848	4.84843e-05
ZMYND12	26.0948	1.13782	0.048113
LINC01777	21.412	1.13756	0.0195135
CD200	73.551	1.13456	0.00321666
SPATA6L	55.3518	1.13403	0.00424792
TMEM158	357.809	1.13362	2.19555e-08
PTGFR	15.2343	1.13298	0.0459376
ERVV-2	60.76	1.13186	0.0161886
AC087203.3	32.4759	1.13184	0.0142591
PROM2	46.86	1.13161	0.0320844
C16orf74	376.594	1.13119	3.02304e-18
ADAP1	466.521	1.13073	4.46351e-17
CCDC169-SOHLH2	38.9182	1.13032	0.0299181
AC079922.2	64.779	1.12964	8.61941e-05
WDR1	12088.5	1.12898	1.09562e-28
MSX1	641.888	1.12806	3.47733e-16
SYT15	456.27	1.12725	7.27177e-14
AC092903.2	35.9872	1.12663	0.00284946
IGF2BP2	5316.7	1.12636	1.83601e-42
AC148477.4	20.9268	1.12632	0.0471204
S100A10	12016	1.12493	8.31251e-24
UBE2S	5368.62	1.12488	6.861e-23
NUP210	2474.76	1.12455	1.49767e-23
MAP3K7CL	150.299	1.12398	2.90321e-09
FHL2	2309.55	1.1237	1.26951e-23
SRRM3	406.181	1.12282	2.6324e-15
AC244153.1	322.524	1.12273	3.89382e-21
BPIFA2	22.6494	1.12256	0.0408961
ESX1	1145.55	1.12018	3.07682e-10
MEI1	21.7423	1.11999	0.0385434
AC027117.1	17.3718	1.11946	0.0286643
DDIT4	5087.59	1.11892	0.000427857
C5AR1	91.9107	1.118	2.79314e-05
CHRM3	17.4854	1.11798	0.0470183
SLC12A7	1143.96	1.11775	6.70957e-11
NPAS1	1188.24	1.11764	1.30153e-25
CYP24A1	230.735	1.11635	3.95238e-07
DRAP1	3957.91	1.11427	1.27101e-30
MARS	14346.5	1.11314	4.84986e-54
FOSL2	5985.01	1.11305	7.5963e-25
FOXL1	378.207	1.1116	3.12649e-14
RAB38	37.3784	1.11064	0.00958713
LINC02600	73.1274	1.11025	2.73726e-06
TLN1	34235.6	1.10939	2.69538e-25
TPBG	2572.5	1.10928	1.01204e-51
OR2A1-AS1	214.818	1.10917	5.68294e-10
ZP3	653.848	1.10916	1.0458e-13
OTUD1	108.539	1.10834	7.03277e-07
SLC37A2	644.402	1.10816	3.82705e-12
ZYX	10900.5	1.10813	8.76825e-20
PLEKHS1	100.445	1.10756	0.000227725
DUSP23	365.85	1.10704	4.92928e-10
AC139769.1	26.5848	1.10676	0.0102965
ARSI	573.046	1.10656	1.78726e-07
KIF17	286.115	1.10368	1.38517e-08
TSEN15	2116.41	1.1024	2.53728e-16
ZSWIM4	566.84	1.10218	3.49528e-19
GNGT2	60.857	1.10179	0.000568367
NT5C2	2575.3	1.10173	1.25497e-23
FALEC	20.5505	1.10172	0.0349764
WNT2B	151.259	1.10153	6.08414e-07
AC092198.1	26.2795	1.10151	0.0120848
RAC2	3122.91	1.10125	2.14494e-19
LEF1	105.299	1.10056	4.27482e-05
RTN4R	369.646	1.1005	6.9094e-10
LINC01666	39.0663	1.10005	0.000532795
RAP1GAP2	2036.06	1.09901	2.15501e-20
NT5E	5643.19	1.09848	2.44881e-11
EIF3D	11749.8	1.09847	2.22821e-18
PLCG2	1243.88	1.09803	9.66192e-13
CLMN	1499.99	1.09729	1.47933e-24
C1orf162	17.402	1.0971	0.0495049
SPANXA1	416.049	1.09705	2.90931e-07
SUPT3H	446.391	1.09701	1.43718e-21
PLPPR3	186.16	1.09497	9.01233e-11
HIST3H2A	214.916	1.0944	2.21024e-07
PRAG1	3099.32	1.09314	1.14315e-12
FCRLB	100.974	1.09281	6.82139e-06
PIK3AP1	191.324	1.09194	5.78511e-08
DNAH10	134.537	1.09193	0.0119041
CEBPD	169.019	1.09156	6.18406e-07
FAM27C	79.2934	1.09026	1.35454e-06
RIMS4	97.0528	1.08992	0.00104404
EIF1	14837.8	1.08962	1.04239e-32
TJP2	4658.74	1.08917	7.30531e-31
C3orf52	168.17	1.08905	7.65537e-08
AZU1	16.2675	1.08815	0.041353
NEK6	8959.61	1.08721	1.05457e-25
CXCL5	15.4373	1.08711	0.0316489
LINC02575	49.3303	1.08687	0.00370986
SPHK1	935.08	1.08623	4.02289e-22
FAM24B	116.442	1.08489	1.92158e-09
AC098487.1	25.414	1.08427	0.0379418
HIST1H2BN	83.965	1.08399	0.00011878
NFIL3	1500.97	1.08381	3.30054e-08
PCLO	431.353	1.08357	4.12842e-05
AC092802.1	33.094	1.08238	0.0120357
TCAF2	445.377	1.08232	0.000162156
ITGAX	188.976	1.08121	3.57432e-08
ASAP1	7407.4	1.08037	4.67241e-27
MAPK13	160.047	1.0791	1.67171e-08
CDT1	1350.49	1.07905	0.000167357
EVA1C	367.599	1.07822	5.60802e-09
MKNK2	4825.5	1.0773	3.39191e-18
ATG9B	118.269	1.07656	0.0127237
AP001453.2	57.5525	1.07574	0.000788649
PIPOX	53.9548	1.07564	0.000385151
NFKBIE	433.063	1.07562	1.27377e-08
TYRP1	289.056	1.07455	1.12372e-15
SYNPO	2426.23	1.07315	2.22076e-20
BNIP3	2020.18	1.07276	5.36202e-11
CYP11A1	221.602	1.07109	6.42795e-11
UPK1A	68.1822	1.07107	0.00807521
RASAL2-AS1	121.495	1.06996	1.31652e-07
NFKB2	732.716	1.06966	3.46013e-11
HK2	2102.95	1.06701	4.12571e-14
AP000523.1	53.7649	1.0666	0.000184014
FGGY	156.546	1.06621	6.94453e-05
MYRF	3061.45	1.06589	4.5145e-25
TRIO	14689.8	1.06585	1.28937e-32
C19orf38	23.2126	1.06555	0.0325488
PDGFA	1396.48	1.06527	1.53727e-13
ERN1	835.878	1.06273	0.000292943
CACNG4	946.348	1.06172	2.30617e-08
SMOC2	58.3939	1.06121	0.0343676
MSANTD3	2120.17	1.06116	2.99774e-30
STXBP2	1158.88	1.0601	2.87958e-21
SCN5A	570.944	1.05937	1.21822e-07
NXN	1791.1	1.05925	4.32068e-18
AP000759.1	69.8837	1.05908	0.000180439
CD22	253.992	1.05855	1.35411e-05
GALNT9	229.188	1.05794	4.48213e-05
LAMB4	116.101	1.0578	5.6736e-05
HIST1H1C	590.506	1.05753	2.3707e-07
NOS1AP	114.769	1.05738	4.77362e-06
CARD11	487.364	1.05538	1.34322e-06
MAMDC2-AS1	35.106	1.05472	0.0033994
TTC7A	1548.82	1.05353	3.63228e-27
LINC02454	19.9487	1.053	0.0321395
BRI3	3521.08	1.05132	1.12524e-14
TSPAN13	149.312	1.05095	0.000575951
ZNF560	384.62	1.04898	6.30811e-11
MAD1L1	2125.82	1.04883	1.42415e-28
SLC1A6	42.1192	1.04746	0.00760535
RRAS2	2136.44	1.04738	3.7928e-27
RNASE4	101.25	1.04718	0.00533799
OR2W3	22.5417	1.04701	0.0184997
GPR160	34.9944	1.04466	0.0118633
FTSJ1	3401.26	1.04442	1.0399e-42
KCMF1	2322.44	1.04398	6.66242e-15
PDE4C	138.941	1.04177	0.0244251
TBC1D30	168.141	1.04107	2.90164e-07
PLEKHA6	883.887	1.04074	3.17871e-06
ROBO3	1232	1.04046	6.2035e-17
ZBED1	2312.9	1.03922	3.13671e-21
ZNF438	178.94	1.0384	7.84919e-11
ZIC2	467.909	1.03765	2.36975e-08
DOCK9	3479.8	1.0374	3.87319e-19
ITGB4	449.066	1.03697	7.35865e-07
KYAT1	621.628	1.03668	8.56985e-24
AP003393.1	17.2989	1.03657	0.0311801
NTMT1	2667.51	1.03589	1.15495e-29
HOXC5	53.4894	1.03448	0.00241327
RUNX2	681.129	1.03446	7.01785e-12
AC004951.3	24.482	1.03419	0.00406703
RSPO4	543.324	1.03353	1.7203e-17
AL359182.1	21.1302	1.0328	0.0292567
TCHH	60.1409	1.03212	0.0142155
THEMIS2	327.714	1.03077	4.43719e-11
XAGE3	258.237	1.03023	1.59134e-11
RAET1E	123.762	1.03022	8.97167e-07
ASPHD2	456.486	1.02985	1.05071e-20
ARHGEF2	9221.87	1.02904	2.08836e-07
COL9A2	63.2301	1.02903	0.00829483
CLU	7930.29	1.02903	1.11777e-16
PPM1E	322.44	1.02893	0.00038932
TRHDE-AS1	181.933	1.02829	3.69219e-06
LYG2	18.1822	1.02811	0.0221179
TMEM139	162.565	1.02558	6.20167e-08
LINC01835	24.6209	1.02531	0.0439979
CRISPLD2	701.9	1.02531	3.67428e-06
LRRC2	129.992	1.02486	2.6681e-07
STAC	1317.9	1.0226	5.08549e-09
AKAP2	11074.5	1.02232	2.11854e-31
PGM2	2123.78	1.02086	5.67195e-28
ACSL1	1243.22	1.02082	2.24672e-32
CDKN1A	368.888	1.01991	3.33658e-13
ARHGAP23	5404.48	1.01974	1.14832e-30
MB21D2	492.152	1.01928	5.98252e-21
RADIL	174.701	1.01895	7.59245e-08
MYL12A	9438.49	1.01875	1.09404e-33
COMT	3313.74	1.01843	1.56675e-17
GGT5	898.82	1.01813	9.03121e-07
MESP2	29.9106	1.01763	0.010075
ASGR1	173.818	1.01718	9.52816e-09
PHLDB2	5271.38	1.01708	8.51301e-10
KIAA1211	73.818	1.01698	0.00120694
AC015468.3	39.3846	1.01547	0.00106618
CCNB1IP1	4135.16	1.01513	6.85142e-21
PLXNA2	1668.33	1.0145	2.30654e-11
ALG1L6P	33.2655	1.01442	0.00222085
LARGE2	219.811	1.01421	1.97045e-06
DNAJB6	11954.6	1.01403	5.57504e-52
ADRA1B	405.851	1.01379	0.00355953
BLVRB	2573.36	1.01366	1.12295e-19
CMIP	2119.78	1.01258	1.37553e-21
CYS1	92.6595	1.01232	2.56674e-05
AL031587.5	395.712	1.01178	1.47154e-11
AC020904.2	128.767	1.01134	9.35394e-08
ACTG1	90431.5	1.01004	3.21711e-07
AC020916.1	458.587	1.00972	2.07393e-14
DES	57.9881	1.00874	0.00428434
AXIN2	442.724	1.00786	3.68233e-07
AL844908.1	27.5697	1.00776	0.0102382
ANKRD20A19P	42.1446	1.00703	0.0388852
CT55	51.5436	1.00671	0.000128282
XAGE2	41.3068	1.00668	0.0384337
EGFL7	1775.99	1.0066	5.23601e-11
HSBP1L1	284.455	1.00423	7.63368e-09
MSRB3	1780.2	1.00344	1.42988e-17
SSUH2	29.2428	1.00334	0.00528404
TAX1BP3	4806.33	1.00141	3.72079e-16
LIMA1	10004.9	1.00074	1.39847e-19
SYDE1	3531.24	0.999565	3.87026e-16
FOXD3-AS1	24.5755	0.997854	0.0333766
AC010618.4	100.578	0.997518	0.000731044
RANGAP1	7733.94	0.997414	5.31434e-37
ANKRD18A	120.652	0.997301	0.00263691
PORCN	684.938	0.996141	3.43807e-13
RAB31	4038.6	0.995994	7.18448e-35
TMEM56	329.454	0.995781	1.22403e-05
SOCS3	897.818	0.995125	0.000390334
GPR4	237.515	0.99498	8.93447e-05
ESPNP	31.5115	0.994317	0.0264658
CTNNAL1	7787.25	0.992379	1.81964e-12
L1CAM	10255.4	0.992327	1.51117e-09
LINC00937	58.8563	0.991539	0.0238921
CKS1B	3700.24	0.991289	1.56113e-25
SAMD11	775.42	0.990927	0.0381464
ATXN2L	9348.97	0.989998	1.33866e-16
AGT	33.3491	0.987562	0.0239092
KLRG2	100.549	0.987462	0.000368501
CD68	753.459	0.987034	4.12918e-07
TXNIP	25810.3	0.986549	2.8119e-07
LHFPL4	27.8147	0.985497	0.0259058
RAB3IP	248.084	0.984705	7.86593e-05
RPH3A	45.7799	0.984428	0.00500933
MGAT5B	1657.99	0.983134	8.44283e-14
TPK1	102.279	0.982912	0.000106915
SH3D21	340.839	0.982848	5.34829e-05
RIN1	1365.46	0.981294	9.15331e-12
LDLR	5914.41	0.980578	1.41962e-12
SH3RF2	238.264	0.980176	1.65824e-06
AC105052.2	44.08	0.98011	0.00350636
AJ011932.1	30.9981	0.978857	0.0174733
AL136162.1	32.3372	0.97728	0.00663203
FUT1	131.454	0.977241	0.00703208
SYTL2	1943.87	0.976594	1.37199e-06
AL138478.1	119.427	0.976291	0.000211061
C1QTNF1-AS1	25.0661	0.975105	0.0454719
IER3	2184.94	0.975022	6.6238e-14
AC011558.1	173.96	0.974294	0.00032306
MAP3K14	719.888	0.974136	1.91112e-09
DPY19L2P3	201.815	0.973924	9.76986e-05
UCHL1	173.57	0.973076	0.000165291
CABLES1	2714.74	0.972788	1.5672e-10
ISL2	61.7226	0.972758	0.000342121
NRN1	401.803	0.971513	0.0451725
UBALD2	914.133	0.971247	6.08066e-09
LMNA	16821.2	0.970423	7.42838e-21
DDX20	1407.65	0.97027	6.22282e-42
SEC14L5	39.3433	0.970129	0.00151588
IRS2	208.409	0.969819	6.96163e-09
MEIOB	1375.79	0.969243	1.76963e-12
HAX1	4016.22	0.967746	1.64684e-17
AC013394.1	193.205	0.967166	0.000939487
PLCD3	2293.89	0.966896	2.93455e-26
LASP1	19014.4	0.966514	2.80816e-21
CDC20	4779.12	0.966464	1.64065e-13
ASB4	79.7481	0.965136	0.00153478
JAG2	524.735	0.964721	8.76978e-06
NAV3	102.718	0.964452	0.0394106
AC005330.1	96.1283	0.9637	7.44716e-06
CASZ1	165.577	0.963644	4.84059e-06
GEM	363.987	0.963491	6.32427e-06
CSRNP1	686.128	0.963236	3.96045e-19
CYP2S1	1720.58	0.962383	3.64444e-07
FAM129B	17789.8	0.96232	2.38223e-23
EEF1B2P6	25.7244	0.961134	0.0436475
LINC00346	364.436	0.96102	1.22675e-18
MYL12B	10882.2	0.960689	4.82287e-55
SAMD12	473.397	0.960669	0.000171602
NFASC	750.118	0.96037	1.91432e-19
AL161729.4	34.7474	0.958845	0.0102705
TLN2	3537.81	0.958548	2.68548e-08
TLE4	2216.44	0.958436	7.48845e-07
KTN1-AS1	455.572	0.958115	7.11234e-09
ECSCR	314.089	0.957349	1.36826e-09
MICB	1091.3	0.956793	1.14666e-06
HEBP1	1059.86	0.956422	4.81519e-18
IFITM10	41.8579	0.95594	0.0390956
NA	111.629	0.955875	0.0136326
GRID2IP	33.4	0.955823	0.00528328
P2RX7	1431.08	0.955742	5.42451e-10
RPL12P38	32.1508	0.95565	0.0184514
ST8SIA2	194.5	0.954718	0.000218012
AL353813.1	25.3863	0.954454	0.0487064
MYO18B	38.5381	0.952964	0.0417008
HHEX	480.036	0.952852	8.8785e-09
LONRF3	116.179	0.952319	1.6246e-05
ASTN1	2110.21	0.950878	1.10715e-13
SPRYD3	1098.05	0.950867	3.07916e-15
HOXC12	131.337	0.950806	1.28857e-06
RNASET2	534.095	0.949977	6.16344e-12
AL118516.1	162.677	0.949886	2.21535e-08
ATP8B1	1504.62	0.949411	7.77723e-14
AC044860.1	85.8122	0.949195	0.000379164
RBCK1	7551.37	0.949051	6.99538e-13
SLC35G2	48.3912	0.948833	0.0082679
PYCR1	8366.04	0.948014	2.19477e-15
AC135506.1	22.3711	0.947997	0.0334739
AC025857.2	32.6433	0.947754	0.0327558
P4HA2	4210.48	0.947205	7.16541e-21
CD82	1265.27	0.947036	1.46322e-06
CRY1	1344.1	0.945921	8.75427e-14
FPR1	28.6061	0.945895	0.0179037
APOPT1	868.813	0.945876	1.19489e-16
TAF7L	37.7087	0.944944	0.00817438
SNX8	3274.67	0.944703	1.15105e-11
PGK1	28199.9	0.944088	8.53782e-09
LINC01881	83.2525	0.944001	0.0149679
INPP4B	1588.24	0.943519	2.79234e-12
MEAK7	2844.52	0.943035	1.22799e-15
PATJ	706.597	0.94264	1.53116e-06
AC018630.2	44.0344	0.942502	0.00318132
CT45A1	1229.58	0.942295	1.53482e-20
MRPL23-AS1	189.688	0.941956	8.60568e-09
[truncated: 7,868 more rows]

## Sheet: DEgenes_SW872_TAZ-CAMTA1_vs_EV
Gene	baseMean	log2 Fold Change	padj
CXCR5	38.3826	30.6567	1.51875e-12
AP003419.1	46.0143	21.4964	1.33295e-10
AC010323.1	29.9968	8.80503	0.0389026
BRD7P2	96.6777	8.13017	0.0303879
AC135977.1	22.0621	5.80284	0.0436186
NPIPA2	22.558	5.79547	0.0168375
AC005832.4	89.2836	4.63704	0.000367363
MRO	19.7091	4.54486	0.0026871
FBLN5	552.294	4.50847	6.71697e-99
GPR1	155.127	4.31517	6.91956e-09
AC245041.1	18.5183	4.06723	0.0057462
WFDC21P	140.545	3.96259	5.66445e-19
CRYAB	8154.74	3.77501	8.41665e-59
AL157896.1	13.6485	3.65203	0.000186688
PI3	17.9407	3.55888	1.41581e-07
AP1M2	110.38	3.35371	2.11413e-07
MYO7B	109.193	3.29803	0.00536623
NA	179.956	3.24343	0.0407999
UQCRFS1P1	23.2266	3.23992	0.0193296
INMT	744.697	3.07344	2.53036e-140
TRIML2	231.955	3.05208	4.89719e-43
KLHDC7A	24.9132	3.05087	0.00159444
LIMS2	478.474	3.03127	2.36684e-63
NR1H4	131.396	2.95939	4.29046e-05
LRRC15	26.2921	2.91678	0.000166614
PKD1P5	347.947	2.89237	5.0008e-09
KIAA1210	25.7086	2.87327	3.57964e-11
AC005336.1	13.3981	2.77293	0.000299687
TNMD	57.1897	2.64369	4.12576e-07
ZNF185	2431.65	2.63663	5.28588e-135
MYL4	57.4046	2.61289	8.78722e-13
AL355312.3	14.1748	2.61098	0.020278
HSPB3	33.7164	2.59736	1.52283e-05
MFAP5	48.1055	2.57657	3.61341e-05
SLCO1B3	13.2909	2.55419	0.00477809
TNNI1	87.9705	2.55417	0.0490668
LINC02535	49.6485	2.55252	3.81405e-05
CCN2	8122.71	2.54225	4.01469e-37
ITIH3	47.9212	2.49217	0.00129502
AC002401.4	17.6067	2.49009	4.4891e-05
MT-TE	43.6453	2.48995	1.35959e-09
C1S	1174.24	2.47813	2.58155e-20
CHST4	31.9593	2.47759	0.000157016
CSF2RA	877.851	2.47204	1.17884e-40
WTIP	955.442	2.45537	7.65694e-39
MT-TS2	38.2703	2.44353	5.42809e-06
SYNPO2L	54.0993	2.43558	7.15949e-06
COL12A1	7146.72	2.42462	3.61418e-74
GPR17	17.2273	2.36022	5.20532e-05
AMOTL2	5194.21	2.3241	3.43776e-118
MT-TA	109.577	2.26996	1.50469e-08
LINC01220	13.8709	2.26169	0.0391109
PIWIL2	12.986	2.26009	0.014667
STXBP6	354.282	2.25801	2.82272e-20
CD177	28.3491	2.24557	0.0108288
AL590399.4	12.3109	2.22051	0.00389287
AKR1B10	66.9403	2.211	0.0013134
FRMD7	28.1694	2.18575	0.00697653
MT-TL2	78.846	2.15739	5.58788e-08
CXADR	430.958	2.1521	6.15507e-33
GPC4	272.305	2.14222	8.00439e-23
SELP	136.364	2.14137	6.74163e-10
TINAGL1	244.133	2.12365	2.88548e-07
KCNJ5	31.4014	2.11379	2.34896e-07
SLC5A1	28.641	2.11124	7.04133e-06
NPPB	2240.65	2.09235	0.0121013
VTN	154.851	2.02182	5.27982e-10
PKD1L2	885.888	1.9971	2.67172e-11
LOX	1600.91	1.97888	1.28292e-24
TMEM255A	638.275	1.97787	1.24743e-25
WWC1	602.145	1.93228	1.46058e-33
CPA4	8124.8	1.92986	8.18688e-31
CXCL14	171.486	1.92178	7.34291e-08
STX11	126.227	1.91444	7.27051e-09
LINC01693	25.86	1.90535	0.0203912
MT-TH	24.1473	1.88876	0.00459919
TCAF2P1	28.1711	1.88081	0.0023363
ANXA8L1	163.561	1.87313	2.39065e-06
PTMAP5	14.1909	1.86816	0.0426528
AC005307.1	131.452	1.86114	1.06603e-07
MMP28	50.4422	1.83384	9.01345e-06
MEGF6	249.491	1.82541	2.73982e-05
VSTM2L	409.495	1.77411	1.76166e-20
NA	111.629	1.75314	6.6448e-06
ITGB2	124.991	1.72647	8.09106e-06
CALB2	75.5926	1.70566	5.89817e-07
MATN3	531.015	1.68147	6.60535e-31
CARD11	487.364	1.67846	1.05604e-14
ARSI	573.046	1.6762	2.55447e-15
IGFL2-AS1	125.577	1.6754	3.69587e-09
BICDL1	37.5426	1.67084	0.0100226
MT-TI	17.5712	1.66224	0.0179877
EDNRB	780.204	1.65793	1.23155e-33
OCLN	724.086	1.6527	1.58615e-12
AC002480.1	40.6027	1.64774	4.36046e-06
ALPP	37.813	1.63677	0.00301529
CCN1	10596.6	1.63658	1.77893e-45
XDH	47.8668	1.62129	0.0012477
C17orf47	23.5665	1.61699	0.0011956
SYDE2	235.87	1.61446	8.52058e-11
LINC02582	131.149	1.60831	1.9037e-10
MT-TL1	29.6053	1.60566	0.00377516
CYP4F11	312.264	1.6009	5.98287e-20
PPP4R4	23.0223	1.59047	0.0389026
SLIT3	447.797	1.57849	2.96654e-20
AC025423.2	28.5396	1.57769	0.0206426
DMKN	409.41	1.57298	1.40808e-23
UGT3A2	1561.3	1.56786	1.00456e-14
FLJ45513	22.0443	1.56664	0.0147984
HES4	110.14	1.55087	5.38663e-07
IL6	31.6535	1.54817	0.0420457
AP000350.4	21.6648	1.54764	0.0305227
AJUBA	9629.72	1.53981	7.72263e-18
LATS2	922.068	1.52422	2.64391e-42
AC140479.2	142.895	1.49189	8.19954e-16
MAGEB3	36.6029	1.48147	0.000227072
TMEM179	21.2982	1.47908	0.0160514
KRT8	14283.6	1.47745	1.15028e-37
CEACAMP10	596.362	1.47546	0.00528201
SEPT4-AS1	108.708	1.47417	1.0749e-07
AL390195.1	23.2424	1.47245	0.0217137
AC020934.1	20.7445	1.46673	0.0320078
TMPRSS3	63.8542	1.46668	0.000639307
SEMA3B	1213.28	1.465	1.64355e-11
AC027237.3	72.9436	1.46453	0.000490629
CPA1	26.1289	1.4604	0.00623047
C7orf57	122.246	1.45922	3.64428e-05
AC108515.1	38.8566	1.45113	0.000278036
XAGE2	41.3068	1.4457	0.00436418
POSTN	840.519	1.44141	0.00114173
MMP19	140.861	1.44101	2.33044e-06
AC083805.2	26.7639	1.44099	0.000295423
MSC	323.687	1.42884	0.00234692
TCAF2	445.377	1.41637	3.12957e-06
AL603750.1	23.8585	1.41272	0.00368684
BPIFA2	22.6494	1.4058	0.0249136
CYP4F8	24.3395	1.3954	0.0271324
RIMS4	97.0528	1.38453	9.62448e-05
NA	26.0402	1.38131	0.00759203
CD70	205.656	1.3771	1.40118e-14
TEX14	48.1181	1.37326	0.00195703
HHLA1	19.1567	1.37264	0.0491822
CLCNKB	120.262	1.37195	2.26788e-08
STON1-GTF2A1L	83.3021	1.36507	0.000441004
NR0B1	84.7239	1.36166	0.000157016
AC005736.1	74.5968	1.34959	5.21499e-06
ANO4	74.032	1.34795	4.14727e-05
MT-TS1	975.998	1.33916	0.0098378
ELFN2	490.724	1.3344	4.46573e-08
SLC45A2	191.819	1.33417	3.76056e-08
AC116351.1	130.567	1.32053	8.62083e-06
LINC01638	242.897	1.31454	9.33738e-07
FAM189A2	29.5952	1.31309	0.0323188
FMOD	1627.64	1.31171	3.33938e-12
AC105460.1	37.5001	1.30626	0.000559458
MSC-AS1	127.993	1.30468	0.00759203
MT-TT	23.8157	1.29106	0.0223468
MT-TY	275.549	1.27771	0.000912299
AL139002.1	119.784	1.27076	3.91098e-10
BMP2	67.0867	1.26976	0.0027958
IGFBP5	6426.85	1.26705	0.0211412
CLDN2	59.3141	1.26623	0.000405008
MYPN	979.769	1.26422	3.8339e-10
LINC01389	27.2181	1.23436	0.00298492
C4orf48	140.929	1.23276	0.0210851
COL14A1	56.32	1.22395	0.000229201
DNAJC6	116.134	1.22213	0.0090743
SPP1	3358.99	1.22135	6.75683e-06
SEMA3F	497.659	1.22086	1.22144e-19
GFRA3	106.581	1.21765	3.12957e-06
ASS1	1006.36	1.21513	0.0351974
IP6K3	192.455	1.21207	4.81528e-07
CREB3L1	742.929	1.21006	8.88048e-16
MAFK	1886.64	1.2066	2.81683e-26
PEAR1	1120.15	1.20428	1.25344e-18
GFI1	39.2407	1.20222	0.0456863
H19	25168.3	1.19636	0.0412666
SYNPO	2426.23	1.19331	4.52671e-24
MTND4P12	341.764	1.1915	0.000117079
AC104435.2	31.5696	1.1876	0.0108541
POLRMTP1	27.847	1.18735	0.0227345
CAVIN1	22717.4	1.1865	3.85223e-18
LINC01123	472.923	1.18117	1.90121e-15
ATP1A2	143.773	1.1785	0.0423692
FEZ1	659.636	1.17777	1.74345e-14
NEXN	357.851	1.17556	8.73777e-10
TMEM56	329.454	1.16858	9.50531e-07
LINC01106	1890.35	1.16206	1.5321e-42
ACKR1	26.7664	1.16026	0.0161729
WWC2	2643.32	1.15604	1.35959e-09
KCNIP1	288.877	1.15456	1.3047e-06
C1QTNF2	299.247	1.1537	0.000262585
AC096637.2	78.231	1.15327	7.17403e-07
INSYN1	368.995	1.15162	1.12191e-10
DNAJB4	526.359	1.15088	4.15978e-07
CD24	529.119	1.13927	2.18947e-06
AC125807.2	800.769	1.13235	3.62111e-22
NA	40.0837	1.13217	0.0098378
LINC01730	59.1221	1.1308	0.0121929
LAMP3	296.148	1.12654	0.00206416
ESRG	287.451	1.12045	9.18704e-07
CHRD	56.1711	1.11924	0.0218232
C19orf81	35.8847	1.11838	0.0314384
MSLN	108.511	1.11148	0.0413011
AL391121.1	39.0711	1.1107	0.0385607
PLCE1	1326.09	1.1099	1.25079e-21
NPR3	210.582	1.10322	0.000170222
MAMDC2-AS1	35.106	1.10259	0.010106
LMOD1	281.954	1.10036	0.000229201
OLFM2	487.25	1.09763	1.02726e-07
TEK	960.409	1.09628	1.5484e-05
GPNMB	7636.76	1.09349	7.51067e-10
GABRE	2505.18	1.08631	1.0939e-07
JPH2	828.929	1.08355	2.09465e-08
MT-TC	333.226	1.08304	0.00156989
MYO5C	156.772	1.07987	0.00602588
DTX4	442.45	1.07885	3.38122e-06
NPAS1	1188.24	1.07697	3.95621e-23
RBM47	230.515	1.07615	2.13024e-10
LINC01252	31.4906	1.06649	0.0337557
GALNT9	229.188	1.06294	0.000276392
LINC00623	78.4135	1.06194	0.0287851
TMED10P2	29.8009	1.06114	0.0320412
GHR	39.6777	1.05254	0.0373108
TRIM29	531.289	1.05017	0.000483041
PLS3-AS1	36.4511	1.04905	0.0246119
PALMD	192.652	1.04851	1.43772e-05
PTCH1	1620.68	1.04778	6.46979e-09
LAMA1	1777.37	1.04539	1.98682e-07
NXNL2	101.711	1.0441	1.34201e-06
IL6R	802.327	1.04168	8.66683e-10
COL1A1	951.61	1.03645	0.000266133
MAN1C1	266.164	1.03642	4.5807e-05
GAD1	53.2255	1.03147	0.00432155
PPFIBP2	404.168	1.03041	0.00265145
CACNA1I	43.8467	1.0291	0.0432513
MYCL	127.961	1.02753	0.00285911
SPTAN1	27548.3	1.02346	4.38594e-46
C2orf72	79.4076	1.02152	0.0478726
PANX2	146.588	1.01437	4.5807e-05
CDH3	1193.52	1.00991	1.75044e-14
TEAD4	1502.04	1.00958	1.99486e-22
LINC01836	94.1276	1.0095	9.5798e-05
SLC47A1	75.6405	1.00912	0.00668517
RCAN1	3868.5	1.0051	8.30648e-13
PTHLH	279.599	1.00507	0.000207173
CLU	7930.29	1.00497	7.44105e-15
HOXA1	545.361	1.00184	9.00621e-19
MORC4	2027.3	1.00177	8.2829e-34
CALHM5	354.116	1.00146	6.22294e-07
KRT15	92.3294	0.997652	0.0414171
SPTB	236.361	0.994839	0.00430987
KRT80	1730.68	0.987494	0.000816918
ADAMTSL1	298.736	0.984631	0.000217834
ALS2CL	852.731	0.982908	6.49961e-07
NA	98.2864	0.971789	0.00491431
TP63	52.1614	0.952599	0.0326168
SSPN	336.988	0.93735	0.000404209
PTH1R	160.129	0.936238	0.000217834
AC245060.6	212.778	0.935274	0.00399065
PLA2R1	868.558	0.934671	3.34086e-10
RAB3D	372.349	0.929029	3.12957e-06
HUNK	113.234	0.926573	0.000242067
FAM167B	176.226	0.921793	0.000880632
MYLK3	310.161	0.921676	1.32276e-06
SMPDL3A	94.5771	0.921659	0.00016477
SNX10	285.763	0.919976	0.00304784
RGS9	137.352	0.917508	0.0070212
TNFRSF12A	3033.22	0.915044	1.05905e-07
HSBP1L1	284.455	0.913163	9.31621e-07
C1R	3793.03	0.911878	6.62328e-08
MT-TN	372.071	0.905954	0.00715449
AC126335.1	71.2648	0.904438	0.00476858
DPP4	73.6292	0.902799	0.00790106
RASGRF1	134.707	0.901626	0.0381216
GATA4	1468.76	0.893447	9.50115e-07
MALL	777.059	0.889828	7.3943e-07
DAG1	8402.8	0.88971	7.44105e-15
PIM1	1122.78	0.888365	0.000227072
BHMT2	687.404	0.887699	2.25953e-06
CAP2	1928.4	0.887282	3.47612e-18
CAV1	23107.4	0.885928	3.883e-11
HDAC9	214.499	0.883596	0.000207173
ANXA1	9614.09	0.883009	0.000417405
FLNC	24286.4	0.882201	1.89224e-10
SHISA3	161.73	0.88122	0.0292294
SPTBN5	182.573	0.878705	0.00435851
GAREM1	159.127	0.876148	9.1704e-05
PCSK5	671.717	0.874528	0.0014635
PDCD1LG2	137.941	0.872332	0.00841613
GRHL1	65.0641	0.87153	0.0488178
ABCG2	617.269	0.867136	0.00132369
COL3A1	378.361	0.866947	0.00056721
PLS3	10420.3	0.866436	1.29455e-20
ZBTB45P2	717.732	0.865683	1.28703e-10
ADAMTS15	608.323	0.857622	1.99931e-10
LRRN2	226.485	0.849246	0.000422784
NSUN7	276.916	0.84915	8.17241e-05
CAV2	2124.49	0.84575	2.20477e-10
AC090409.1	76.0238	0.844221	0.0172094
CYP39A1	219.428	0.843563	1.58667e-05
TNFSF9	133.004	0.842243	0.00681147
LINC01666	39.0663	0.841498	0.0372085
TP53I11	1725.49	0.841343	4.43128e-13
GPC3	69.2099	0.837035	0.0267882
SYDE1	3531.24	0.836982	1.79878e-10
C9orf3	1301.87	0.835327	9.3821e-16
AC099548.2	253.668	0.830667	0.0190166
PDE11A	1409.74	0.826967	0.00962471
TMEM139	162.565	0.82645	0.000100893
CEBPD	169.019	0.825308	0.00137381
AC068279.1	52.8087	0.823684	0.0100133
RTN4R	369.646	0.817523	5.55793e-05
GLT8D2	304.746	0.817506	9.09695e-09
SERPINA1	129.249	0.815323	0.0161498
AC104563.1	50.113	0.814244	0.0307056
PHACTR2	1004.3	0.810111	0.000198917
OTUD1	108.539	0.807705	0.00229021
FIGN	438.451	0.807661	9.8228e-07
AL161431.1	253.719	0.802473	0.00250788
TEAD1	10940	0.802215	5.71262e-07
SORL1	4958.87	0.79394	1.01367e-08
FAS	239.257	0.789847	0.00257403
PARP8	150.969	0.783029	0.0117607
CX3CL1	347.803	0.779613	0.00149121
MTND1P23	155.905	0.777502	0.0131861
RIPOR2	1126.47	0.772212	0.00260042
WNT5B	481.159	0.771411	0.00118377
B3GNT5	183.335	0.765182	0.00715449
MYORG	1497.76	0.765034	2.02569e-05
CYS1	92.6595	0.760408	0.00988511
ETS2	1570.48	0.759671	5.00231e-13
IGF2	2046.49	0.75807	0.000776798
AC008957.3	81.6423	0.757958	0.0246969
GPX8	5676.18	0.757085	8.60955e-09
ITGA3	22276.6	0.756761	8.91549e-12
SYTL4	710.623	0.756487	0.000227072
HSPG2	6936.11	0.755478	4.12588e-06
FBLN7	185.287	0.755246	0.00288921
PLIN4	68.6546	0.753887	0.0378231
THBS1	3896.64	0.753664	1.5309e-09
PLEKHA6	883.887	0.753249	0.00586088
PPP1R12B	1810.48	0.752705	1.23566e-18
STON1	979.045	0.752072	6.81173e-11
AC020898.1	58.2027	0.749136	0.0301901
SRPX2	1641.57	0.747563	0.000323067
TUFT1	886.636	0.746586	3.36631e-08
FGD4	160.979	0.746558	0.0208876
EFEMP1	741.11	0.746254	0.00289432
SLC9A3	209.205	0.745641	0.0119434
PARVA	12811.8	0.74527	1.38415e-47
PDPN	1362.46	0.744927	0.000573547
IDH1	9760.19	0.744573	2.64008e-08
ITGB3	1822.99	0.744313	5.5223e-07
ITGA1	11661.1	0.742437	8.83924e-08
DLGAP1-AS2	423.872	0.742132	0.020549
AL162171.1	1232.53	0.738053	1.05392e-12
AC093616.1	454.26	0.73659	0.000224172
KLF2	119.591	0.733948	0.0141792
ASPH	8470.78	0.73341	2.69898e-10
IFI6	1717.79	0.728928	0.000885335
NXN	1791.1	0.728753	5.76866e-08
ARHGAP23	5404.48	0.72726	8.18633e-15
APOLD1	451.96	0.724031	7.6479e-07
MSRB3	1780.2	0.718677	1.86003e-08
MMP24	326.471	0.715378	0.00191238
MYOF	15695.7	0.711985	5.09576e-07
NECTIN2	5365.87	0.711642	5.30163e-09
ZNF219	899.689	0.708356	7.73542e-08
SPANXB1	1009.09	0.708125	2.19295e-06
LHX8	280.786	0.707924	0.0314824
PRRG4	102.502	0.704191	0.0341956
HNRNPA1P48	182.581	0.703507	0.010949
SGMS1	501.84	0.701851	0.000910968
MAP3K21	160.683	0.701784	0.0183426
L3HYPDH	792.482	0.700027	1.67234e-11
TENT5C	137.876	0.699826	0.00522609
TSPAN33	331.382	0.699669	0.000145373
ROCK2	3281.84	0.69903	0.0225689
MIR22HG	876.977	0.698979	1.93642e-14
MID1IP1	1888.37	0.698672	0.00051748
CARD16	266.334	0.697487	9.62448e-05
EHD2	10312.9	0.696998	5.36217e-09
ACKR3	110.635	0.693967	0.0423692
RALGPS1	346.672	0.69392	0.0160514
TENT5B	961.981	0.693645	0.000306098
PLEKHA7	2443.23	0.691692	0.000239159
PKNOX2	537.562	0.689963	0.000102096
SORT1	7230.54	0.688219	1.55704e-11
ADORA1	215.683	0.68732	6.32556e-05
AP000662.1	132.609	0.686705	0.0191627
SLC13A5	229.875	0.684344	0.0442254
DSE	960.899	0.684144	4.66112e-12
MIR503HG	2154.71	0.683781	0.0273765
EMP1	5374.26	0.683003	0.00257855
LMBRD2	905.464	0.682951	0.0380651
PROSER2	428.443	0.6825	0.00499959
NOS1AP	114.769	0.680182	0.0214979
ADAM23	710.608	0.67892	2.16082e-06
RFK	851.805	0.677732	0.00165536
GCLM	1084.26	0.677586	0.000521027
AL592183.1	230.821	0.67753	0.0142549
TMEM92	202.848	0.676404	0.00450865
CGNL1	895.542	0.676047	6.57469e-05
USP43	231.423	0.675464	0.00225552
SGMS2	606.781	0.674704	0.0047131
COL1A2	3558.44	0.66478	0.0472017
BASP1	2291.35	0.664324	0.000293105
RNF122	196.355	0.664199	0.00319185
ME1	734.961	0.663508	3.81405e-05
WWC3	2266.24	0.662407	3.75425e-06
PTPRK	2144.78	0.662403	5.4595e-07
SKA2	1597.5	0.659043	2.83699e-07
AP002761.3	81.1854	0.653018	0.0191907
KRT18	26282.3	0.652417	7.14253e-07
LIPH	201.11	0.651676	0.0200817
PTPN14	5617.29	0.650999	2.75952e-18
RHBDF1	1735.66	0.650598	1.39191e-07
FZD5	364.794	0.649238	4.82779e-06
ADAM9	9482.94	0.649174	0.000670864
CADM3	1193.86	0.649145	0.000791711
CHRM4	157.72	0.648241	0.0293012
AC243964.3	235.824	0.647791	0.00229021
LINC01503	111.752	0.6458	0.00946863
B3GALNT1	1058.7	0.644486	3.49116e-07
ICA1L	195.105	0.643929	0.000654486
MBNL2	5478.88	0.642447	0.0185178
KCTD11	1277.42	0.641682	4.07172e-05
NANOS1	479.332	0.641234	0.00281744
ELFN1	408.29	0.640456	1.93985e-05
GLI2	1186.16	0.639347	0.00337494
RFTN1	2508.13	0.636016	3.49116e-07
CHST3	1381.8	0.635957	6.72723e-08
RRAS2	2136.44	0.635847	1.86337e-09
BIRC3	138.571	0.635553	0.0377052
TBC1D8B	395.737	0.635534	0.0253279
CASC10	644.519	0.634116	3.63339e-08
QKI	4899.42	0.632591	4.54929e-05
SLC25A30	977.353	0.632484	0.00134265
DDR2	12220.9	0.632096	0.00249439
CALD1	17077	0.632073	2.85844e-05
AC087473.1	176.746	0.631387	0.0311112
USP48	3298.93	0.63022	1.14644e-07
PARD6B	133.561	0.630188	0.0350606
BEND7	460.516	0.630126	2.07217e-05
GADD45B	977.097	0.629185	3.59317e-06
COL4A5	2752.11	0.629061	3.57824e-06
SBDS	6786.19	0.627615	6.72723e-08
HOTAIRM1	1189.09	0.625806	6.5342e-09
ARHGAP29	4982.78	0.624257	0.00997667
SBDSP1	833.121	0.622928	0.0193296
KLHL5	3640.73	0.622847	0.000409277
TGFB2	3830.69	0.620925	1.41581e-07
SBF2-AS1	216.803	0.620637	0.037565
STAC	1317.9	0.620513	0.00399429
LPCAT2	1115.44	0.619672	2.32201e-06
ANO6	6166.89	0.617677	4.16019e-09
SLC12A7	1143.96	0.617591	0.00373254
UGT8	101.089	0.617245	0.0118424
RAB37	569.438	0.616369	0.00235415
FLNB	29152.8	0.61599	8.17241e-05
RALGPS2	1148.03	0.614118	0.000217834
WHAMMP2	146.345	0.613365	0.00786399
LGR4	3291.63	0.612667	8.23887e-06
PPIAP22	335.073	0.612448	0.0229348
CEACAM19	174.75	0.612101	0.0244794
NFE2L3	4016.43	0.609403	1.33729e-06
SLC2A13	99.1851	0.608471	0.0443587
NUDCD1	1948.35	0.604689	0.00116997
CLIC6	238.71	0.603496	0.0119434
WNT5A	1223.95	0.603187	0.000505907
TLCD2	1283.17	0.600878	8.05409e-05
VCL	13667.9	0.598749	0.00182889
RARRES2	5285.6	0.597922	0.0012477
CEP112	429.468	0.597527	0.01363
WHAMM	724.845	0.597113	0.000154263
PLEKHF2	603.111	0.596615	0.00425581
SQOR	301.236	0.59453	0.0033436
C1orf226	396.126	0.594321	0.000826296
JDP2	1542.86	0.594268	0.0438176
ADAM33	189.176	0.594101	0.00423563
SVIP	315.925	0.592628	0.0105025
NFE2	135.778	0.590329	0.0116243
NMRK1	236.402	0.589189	0.00232973
SMIM3	518.837	0.588827	0.00025044
NA	243.527	0.588092	3.61341e-05
SLC46A3	306.615	0.58632	0.00319201
KIF23	4117.41	0.585719	0.00297496
CTNNA1	21483.2	0.584505	1.42193e-17
MILR1	125.334	0.584139	0.00369829
ERBB2	4218.93	0.583344	2.25953e-06
SLC16A4	951.418	0.582764	2.17444e-05
MCC	3773.78	0.58192	3.9726e-10
KIAA1522	1610.96	0.576805	2.30904e-05
CNN2	8063.88	0.576528	5.20546e-09
FHOD3	292.607	0.575302	0.00272672
PEG10	103399	0.574252	0.0490717
CSF1	3189.29	0.574135	7.97303e-07
CRIM1	9816.06	0.573925	1.42973e-05
LAYN	609.028	0.571351	0.00723683
MICAL3	4913.97	0.570449	2.01138e-12
USP18	291.19	0.569341	0.00581101
ZSWIM4	566.84	0.568672	8.9957e-05
AHNAK	122265	0.565724	1.15239e-09
SMO	2973.88	0.564733	0.000142403
RAB6B	890.863	0.562407	0.00152749
CREB3L2	4451.67	0.561035	8.93861e-11
CXCL16	487.481	0.560561	0.00876427
ATP13A3	4319.21	0.559976	0.0129406
LINC01138	170.844	0.559328	0.0406611
AGFG2	3050.77	0.558988	0.00409251
EID2	658.235	0.556617	1.13245e-08
MYO1C	10838.9	0.554021	4.06152e-05
ASPA	207.172	0.552813	0.0042236
PKP4	3485.23	0.552512	2.56574e-05
ADGRB2	2041.47	0.552459	0.000230602
SAMD4A	2581.58	0.551401	0.000291521
SDC2	2063.5	0.550362	0.000122434
ARHGEF10L	688.724	0.548431	0.000166614
TPM1	23789.7	0.547885	1.12143e-05
MAFF	607.032	0.546795	0.0366334
SLC39A8	375.94	0.544462	0.0213604
CYTOR	2035.6	0.54209	1.21652e-05
KCNK6	269.045	0.542032	0.00153655
NQO1	36091.7	0.54172	0.00749215
NUAK1	3145.05	0.540339	5.54788e-05
PCSK9	829.742	0.538387	0.0423222
B4GALNT3	353.394	0.53724	0.00256523
TXNRD1	33083.7	0.535282	0.0348803
C21orf91	509.985	0.533822	0.0296987
2020-09-04	536.273	0.533598	0.00681147
EVI5	724.956	0.53297	0.0100226
RGPD6	2488.19	0.532524	0.0277869
LHFPL6	422.631	0.530428	0.00497257
ARHGEF10	3349.75	0.529286	1.26938e-05
COL26A1	362.579	0.528535	0.00675283
FBXL7	181.702	0.527571	0.0100137
NBPF10	2314.64	0.526587	2.58598e-06
PLAUR	813.972	0.525772	0.0293012
PIP5K1A	3765.17	0.524072	1.32465e-06
TRNP1	1601.23	0.523867	0.00389772
CYBRD1	6049.06	0.521122	5.76848e-10
SERPINB9	1503.78	0.519139	1.73647e-09
TTC33	553.65	0.519026	0.0163716
C11orf96	147.521	0.51896	0.0425006
OSMR	15770.7	0.517522	0.00029706
PDGFRB	11707.3	0.517158	4.98381e-05
FRG1JP	122.945	0.516283	0.0256937
DCUN1D1	609.566	0.516039	0.020739
TMEM64	564.866	0.515382	0.00396933
OTULINL	778.654	0.512982	0.0246119
C16orf87	427.987	0.51228	0.0364078
NACC2	1511.71	0.512044	1.07623e-06
ITPR2	1727.73	0.511396	0.0185954
RBMS3	446.516	0.511214	0.0131336
MPP5	2731.6	0.510699	0.00610461
SCARF2	1756.21	0.509989	5.36217e-09
SEL1L3	3269.86	0.509689	0.00191891
CASP4	3032.87	0.507849	4.68708e-09
PHACTR4	2601.1	0.507389	9.70537e-12
LAMB2	8298.83	0.506448	0.000783985
PRKAG2	1255.56	0.505866	0.00381482
BAIAP2L1	1835.62	0.505085	4.07565e-06
RAPH1	2044.36	0.501727	0.000266133
EPHA2	5020.24	0.501333	0.000612835
NR4A1	297.178	0.500555	0.0154045
TUBB6	6630.39	0.499509	0.022078
EIF4E3	382.384	0.499003	0.00357638
FAM43A	796.789	0.497517	0.00028024
SLC16A5	221.218	0.49745	0.0248756
FSCN1	13820.4	0.497157	0.0026157
GABARAPL1	3444.55	0.49619	1.67397e-06
PRDM5	571.608	0.494123	0.00380847
TBC1D9	1044.57	0.493858	5.39291e-05
RAPGEF2	1880.16	0.493689	0.00751795
REEP3	450.383	0.490403	0.00751369
MBP	3639.44	0.490004	0.0397398
TMOD3	4530.51	0.489234	0.00522609
LYN	763.426	0.488773	0.00380847
NCOA3	5143.41	0.488596	0.00197651
RAPGEF1	4833.33	0.486859	3.40776e-06
MFAP4	931.002	0.482778	0.0200683
TVP23B	715.077	0.482713	0.0389273
IGFBP7	8049.81	0.482706	0.00551438
NA	175.016	0.482332	0.0104381
PAPLN	1234.77	0.482307	0.000887472
ABCC4	5268.94	0.478624	4.31231e-07
OSTM1	1362.32	0.477995	0.0100547
PLXNB2	10147.4	0.477988	2.85318e-05
STXBP5	998.212	0.477668	0.0106078
F11R	1874.63	0.477286	0.0305074
PHLPP2	1636.29	0.477109	2.03271e-08
MFSD6	998.754	0.476167	8.3817e-06
RNF41	3274.28	0.474768	0.0493946
TGFBR3	1252.63	0.47461	0.000424856
CAMTA1	1421.58	0.474389	7.61071e-05
SIRPA	3488.22	0.473371	0.00387372
TPD52L1	2117.34	0.472919	0.0302106
PLOD2	2680.25	0.472909	0.00709062
FAM114A1	1772.25	0.472682	0.00779456
HEG1	10780.5	0.472637	1.13245e-08
ACSS3	176.773	0.472564	0.047714
PTPRJ	3731.3	0.472318	3.80815e-09
NBPF14	4716.12	0.471092	1.9339e-05
INSR	813.98	0.470813	0.0476564
SPART	2174.27	0.470444	1.58667e-05
BCAM	3742.93	0.470122	0.00348553
MID2	540.483	0.467821	0.00299228
USP12	609.872	0.46495	0.0428446
LIN28A	640.034	0.464931	0.0116243
LOXL2	22646.4	0.46299	0.0140693
SHTN1	750.562	0.462279	0.00221509
MYH14	1638.04	0.461444	0.000149982
AASS	1629.74	0.461368	0.00200666
WWP1	1340.32	0.461238	0.022078
E2F8	533.61	0.459507	0.0308774
AC244153.1	322.524	0.457986	0.00244308
PPIC	3752.1	0.454106	3.3719e-07
TJP1	3258.84	0.453762	0.000358387
HOXC6	874.222	0.453202	9.48369e-08
FAM83H	345.193	0.453193	0.00627148
NA	148.907	0.451897	0.0444414
MYADM	3260.6	0.450078	0.00169011
CTSV	629.824	0.449881	0.0116261
RBPMS	1720.8	0.449438	0.000166614
CASP10	374.713	0.448852	0.0294152
EPDR1	1988.55	0.447305	0.00246325
P4HA1	2000.93	0.44712	0.000532365
SMG1P3	308.363	0.446345	0.0396951
SLC17A5	973.125	0.444972	0.0334831
FCHO2	1078.45	0.444934	0.035829
SH3BGRL2	622.824	0.444244	0.0365735
NKX3-1	1379.27	0.443887	0.000231366
AC145124.1	226.683	0.442592	0.0200817
PGM3	2990.49	0.442462	0.0102542
PPM1K	858.448	0.441446	0.0156976
CLTB	1764.88	0.440798	0.000126221
PRRG1	823.357	0.440328	0.00477809
NBPF19	1631.62	0.440132	0.000134141
COL5A1	25458.7	0.439994	0.000154263
METRNL	538.626	0.437518	0.0474523
C8orf58	1572.62	0.436951	0.0398646
SLFN12	950.486	0.436485	0.0134053
CTBS	682.399	0.435663	0.000278036
EHD4	2189.69	0.435211	0.000783985
ATG5	1481.38	0.434957	0.0426934
PPARG	1847.31	0.433636	0.0193764
SLC44A1	3595.73	0.43356	7.07271e-08
PAM	16151.9	0.433533	0.000262585
SEC24D	3034.08	0.432327	0.00255171
NEDD4L	4687.22	0.432062	0.000242744
FTH1	76509.7	0.431452	0.00643117
B4GALNT1	1140.59	0.430944	0.0168375
ARHGAP31	2564.11	0.430837	0.00834189
SCD5	399.681	0.430651	0.0206253
INF2	4687.79	0.430401	0.000163001
GBP1	1438.09	0.42959	0.00148134
GNE	4850.28	0.429186	0.000480319
NOTCH2	14889.5	0.429061	1.42633e-07
FZD6	1565.71	0.429047	0.00317185
MLLT3	633.974	0.427651	0.0263833
FAM174B	267.084	0.427291	0.019094
LRP6	2588.51	0.426105	0.00560745
FZD7	2542.47	0.425687	1.12323e-05
PEA15	12565.6	0.424797	0.0167793
ADAMTS12	10377	0.424654	0.00056721
TENM3	2755.61	0.424274	0.000500637
COL16A1	5086.36	0.423484	0.0178439
LLGL2	1015.84	0.422493	0.00107209
S100A10	12016	0.421689	0.00283557
TUB	3581.77	0.420894	9.90322e-05
HOXC4	316.532	0.420749	0.00892242
CDKN1B	2344.93	0.420069	6.05001e-05
RAB18	819.368	0.419879	0.000524992
DNAJC3	5598.11	0.417712	0.000105299
RAB11FIP1	3684.57	0.417543	0.000338778
MCUR1	1934.26	0.417071	2.99323e-06
TAX1BP3	4806.33	0.416893	0.00871835
PPP2R5A	1252.58	0.415115	0.0012827
LAMA5	8544.46	0.414167	0.0258791
HOOK3	1766.32	0.413433	0.0371863
TNIK	2274.19	0.412397	0.0131068
PRTG	674.982	0.412195	0.0204413
MIR4435-2HG	2097.29	0.412179	0.00109792
ALDH3B1	1300.36	0.41211	0.000929458
FLNA	161615	0.411596	0.00010014
NEO1	7967.41	0.411407	0.00971766
PCDHGB5	192.174	0.410643	0.0377156
SYNE2	2558.96	0.408983	0.0284401
ARNTL2	885.117	0.408655	0.021772
SH3BP5	1459.81	0.407684	0.0160029
CDYL2	2093.84	0.407542	0.00784675
SHC1	17857.7	0.407	0.00256523
FOXD2	276.81	0.406688	0.00742505
PNPLA6	3135.26	0.40644	0.0190189
NT5DC1	1286.05	0.406106	0.000614946
MYH9	39701.7	0.404891	0.00163367
FAM160B1	711.656	0.40469	0.0156976
LOXL3	3055.78	0.40231	0.0280391
NUCB2	1933.07	0.402126	0.0197287
SGCD	2815.58	0.4018	6.74368e-10
TRAM1	4228.4	0.399801	5.70742e-05
MYL12B	10882.2	0.398696	5.36217e-09
EGLN1	1845.31	0.398506	0.012303
SYNJ2	2575.01	0.396261	0.00782822
MAPRE3	973.794	0.395359	0.00288206
FAM122B	3045.6	0.394451	0.00285911
MGLL	4291.09	0.392534	0.0267197
BCOR	2863.83	0.391356	0.000206757
UBR3	2018.76	0.390731	0.030732
PICALM	8631.63	0.388764	0.00520168
ATP11A	1843.25	0.38748	0.0243692
BCL2L1	5620.75	0.387192	0.000112018
SGCE	1697.35	0.387189	0.000870736
MEGF9	1097.54	0.386842	0.00265145
RBPMS2	349.787	0.385736	0.00709062
INTS6	1176.9	0.385164	0.0308
SEC23A	5558.83	0.385083	0.000886924
NFIB	3177.73	0.383729	0.000105826
DCAF6	2454.75	0.382666	0.00536623
HLA-C	3125.12	0.382044	0.0444336
RRBP1	17700.1	0.379413	1.8608e-05
SERTAD2	1650.9	0.378769	0.00600851
PDLIM5	3144.82	0.378311	0.0286893
RAP1A	1573.44	0.377248	7.74218e-06
SOWAHC	557.882	0.37669	0.0331697
SPECC1	1835.88	0.37633	0.00354438
LRRC8C	1363.06	0.375978	0.00631597
PLLP	455.605	0.375079	0.00815243
2020-09-10	3710.92	0.374337	0.0389026
PLEKHA8	1554.56	0.373204	0.0242473
FBN1	3258.58	0.372421	0.0190903
MYO1E	3124.76	0.372219	0.0142549
LINC01578	1662.1	0.371786	0.0189435
BCL6	700.865	0.368662	0.00791005
SLC1A3	1565.1	0.368509	0.0418958
GSTA4	526.7	0.367929	0.0207466
SERPINH1	45395.9	0.366315	0.000323067
PDLIM1	4528.31	0.365256	0.0182183
AMIGO1	1025.26	0.365238	0.0292294
PKD2	2184.66	0.365068	0.00226785
ULK2	882.474	0.364889	0.0351536
ADCY6	3447.82	0.364313	0.0141792
NEDD9	1801.1	0.362619	0.0200683
XYLT1	2293.66	0.361791	0.000112729
SLC9A3R1	2447.53	0.361533	0.0248756
GJC1	1901.81	0.361059	0.0114614
LINC00265	516.046	0.360683	0.0398443
GINM1	1586.93	0.360669	3.21067e-05
GPC1	4941.09	0.360526	0.0193776
JOSD1	3246.97	0.360187	0.000224715
STS	1112.18	0.358847	0.000615777
SH3BP4	4262.93	0.357853	0.00680267
UBE2J1	3574.24	0.356732	7.12814e-05
NDST1	8021.33	0.356177	0.00368684
KIF13A	2692.15	0.355827	0.000641592
ARHGAP18	3596.76	0.355815	0.000305103
VASN	2614.47	0.355527	0.0411075
HACD1	437.353	0.355051	0.00239894
LDLRAP1	1727.55	0.353188	0.00391149
CREG1	2653.32	0.351601	0.00104117
BLVRB	2573.36	0.350755	0.0200942
MYO10	14327.8	0.350396	0.00396933
SLC44A2	6112.52	0.350081	0.00207336
NOTCH2NLA	1200.99	0.349807	0.00331339
PIR	1579.36	0.349532	0.0462776
NTN4	1601.3	0.348702	0.00226785
ARHGEF12	14026.1	0.348109	0.00392059
AC092338.1	1800.68	0.347252	0.0133057
DAB2	9628.49	0.346702	0.00070423
CD47	3412.05	0.345183	6.88863e-05
G6PD	13437	0.344763	0.0126135
SMURF2	2056.95	0.343894	0.013826
OPTN	3436.81	0.343605	0.00528201
DPYSL5	1435.74	0.343224	0.018186
TSPAN18	4006.49	0.342081	0.00531138
AFAP1	8267.21	0.341407	0.00303732
TCF7L1	1427.68	0.34137	0.0239104
P2RX6	798.642	0.340548	0.0320078
PEAK1	4818.64	0.339659	0.000606986
STK3	890.568	0.33925	0.0161729
IFNGR2	3672.12	0.339247	0.0176889
MRAS	1665.82	0.338674	0.0226575
TRAF5	901.765	0.338307	0.0383911
GSTM3	4602.83	0.338109	0.0100226
KANK1	4383.02	0.334648	0.000113744
SOCS6	907.811	0.334087	0.00491431
PGRMC1	3576.65	0.333916	0.000173061
SWAP70	3816.15	0.331996	0.00144267
CRYZL1	678.292	0.331613	0.049388
FOSL2	5985.01	0.329458	0.0268107
PQLC3	634.468	0.329359	0.0347988
FGD5	1364.67	0.326782	0.037998
MEF2A	1827.25	0.325925	0.0457751
FMNL2	4188.97	0.325771	0.0269505
YAP1	7292.14	0.325414	0.00202403
NUDCD2	2588.16	0.325009	0.00448541
NRBP2	1261.71	0.324972	0.00457051
UBE2W	670.558	0.324083	0.027035
ITGB1	24729.8	0.322495	0.0025952
INPPL1	9644.91	0.321077	0.00681147
STOM	8123.48	0.321014	0.000298607
TRIM37	2440.2	0.32085	0.020071
TRAM2	9655.07	0.320772	4.04213e-05
DZIP1	7215.68	0.320365	0.00369829
EPHX1	3232.59	0.319862	0.0393736
DENND3	1469.52	0.319529	0.0171174
ADAM10	7600.93	0.319506	0.0377156
PON2	4494.21	0.319352	0.000507883
ITSN1	4401.63	0.319084	5.31168e-06
SAT1	2227.26	0.317889	0.0457751
ENY2	2390.59	0.317313	0.0012827
BPGM	883.704	0.316145	0.00203698
TGFBR2	6562.55	0.316056	0.018186
KIRREL1	10728.7	0.313736	0.0109875
OSBPL1A	2509.62	0.313476	8.41725e-05
SHROOM4	459.885	0.313183	0.017457
LGMN	4006.82	0.310909	0.00876427
SPPL2A	1140.97	0.310613	0.0206426
CTSZ	14220.5	0.308661	0.0277566
TFE3	7339.4	0.308207	0.0100133
TTC39C	430.971	0.30731	0.0267197
ZHX3	3668.79	0.306729	0.0400659
NFASC	750.118	0.305486	0.0448836
SETD7	2957.17	0.305386	0.00306398
CACUL1	1176.62	0.303259	0.0362429
MROH1	1333.3	0.302735	0.0246119
KLHL42	1254.38	0.302442	0.00191891
CPD	5957.82	0.30177	0.0442254
MARCKS	3627.18	0.301416	0.0162661
FERMT2	5028.13	0.300211	0.0209564
RNF11	2230.72	0.29943	0.000284755
PFN2	10428	0.299414	0.00199734
PWWP2A	1799.66	0.299411	0.0117131
SPTBN1	22759.7	0.298873	2.33044e-06
ACSL3	7289.52	0.297872	0.0156976
SLC35G1	581.972	0.294201	0.037521
FBXO9	2299.67	0.293036	0.00880751
COG5	3073.02	0.292994	0.0491051
TRAK1	3100.5	0.291896	0.000507883
EIF2AK2	3388.22	0.291353	0.0230456
USP32	3325.07	0.290304	0.00290192
PDP2	1653.37	0.289004	0.017457
COPB2	9595.88	0.287977	0.00380881
CASP3	1463.76	0.28746	0.0211348
TIAL1	2251.87	0.28745	0.00230744
FADS3	3833.39	0.287322	0.0428137
JCAD	5110.16	0.285349	0.023618
GTF2A2	1816.02	0.282645	0.0136502
NXPE3	1902.1	0.281226	0.0357975
PPFIBP1	7522.57	0.279075	0.00139647
GALNT10	5382.63	0.276776	0.0436186
SCRN1	19372.3	0.276714	0.00204192
CUL1	4998.25	0.275655	2.98705e-05
TRIM5	2409.46	0.274963	0.00784675
PBX1	1185.04	0.27446	0.0323188
ZNF281	1503.23	0.274401	0.020549
CCNYL1	1291.92	0.274348	0.0348803
AHCYL1	7022.28	0.271439	3.47844e-05
NFKB1	2198.22	0.270055	0.0108541
ARHGAP10	734.674	0.268943	0.0218121
FYCO1	2501.03	0.267775	0.012303
TXNDC11	2341.33	0.267535	0.0364078
SNRPE	2384.33	0.266082	0.0381216
EIF2AK1	12276.8	0.265735	0.0261604
ADGRA2	6548.88	0.262225	0.0312031
LUZP1	6874.52	0.259945	0.000887472
ZNF618	3843.33	0.25993	0.0357316
SNAP23	1810.39	0.259806	0.0362429
KLHDC10	3849.17	0.259338	0.0132385
KLHL7	2045.47	0.256985	0.0226735
MAP2K4	1534.37	0.255645	0.0428446
TRIM24	2116.56	0.254895	0.00715449
MGME1	2856.93	0.254718	0.0066301
CEBPZOS	1243.79	0.253049	0.0276129
PHF10	1866.44	0.252923	0.0259948
DAPK1	5388.26	0.252181	0.00753329
PIEZO2	3798.18	0.249504	0.0302424
ANKRD13C	893.531	0.24739	0.0302578
RAB2A	3018.85	0.246695	0.000294416
KPNA4	3635.11	0.246682	0.0117131
TRIP10	3342.1	0.244376	0.00117605
STT3B	6050.76	0.242943	0.0445353
TMEM106C	4149.95	0.242333	0.0179877
HDAC7	5153.46	0.241598	0.0226575
PDCD6IP	6347.38	0.238035	0.0229538
FRMD3	3496.85	0.23797	0.029583
PDXDC1	6002.09	0.235784	0.0467001
PRPS1	3124.78	0.235608	0.0324032
C1orf198	2749.17	0.233782	0.0394355
PHKB	4756.91	0.23359	0.00329096
CYP2U1	1376.72	0.233264	0.0113825
TRAK2	3071.6	0.231813	0.00395864
RCN1	15497.2	0.231275	0.00645732
CFL2	3651.72	0.228914	0.00981417
DOCK1	3315.89	0.224104	0.0226575
FARP1	10323.7	0.223755	0.0389273
KCTD20	6930.13	0.222533	0.000119965
PAFAH1B1	7948.89	0.221934	0.010613
PGRMC2	2270.37	0.217993	0.00924629
NNT	4515.75	0.217319	0.0430622
CSDE1	17721.7	0.21699	0.0398724
REPIN1	8966.94	0.21662	0.0322122
PPP2CB	3807.9	0.2157	0.000558468
SEC22B	4612.53	0.215046	0.0422749
RIC1	2976.27	0.215026	0.00314708
SGCB	2046.74	0.211123	0.0033436
SIPA1L1	3181.58	0.20789	0.0386051
COX20	1221.24	0.207847	0.0470347
PYGL	5642.23	0.206097	0.00668517
MTMR12	3615.83	0.204512	0.0413011
EXOC6B	3172.37	0.201031	0.0343027
MACF1	17521.8	0.198553	0.0280113
EIF2AK4	3997.22	0.197433	0.00721337
UBE2G1	2388.74	0.196806	0.0491051
ELOVL5	4586.48	0.195531	0.030478
HSPA4	19032.2	0.195151	0.0382612
WDR26	5431.77	0.1946	0.00564242
PNMA8A	2550.23	0.19372	0.00522609
EGFR	7757.38	0.1885	0.0456863
UBR5	9785.13	0.187633	0.0440098
UBTD2	1371.09	0.180108	0.0292294
2020-09-02	17670.7	0.171672	0.0314697
FNBP1	5457.46	0.16458	0.0327926
CFLAR	2074.94	0.16376	0.045758
DCAF8	5161.58	0.162092	0.0487104
GOLPH3	5308.92	0.157076	0.0272503
RNF145	10583.2	0.153704	0.0141792
UBE2K	2831.25	0.143876	0.0457751
C2orf68	2322.1	-0.146194	0.0437042
STK35	2874.04	-0.163693	0.0294982
CSNK2A1	11720	-0.165707	0.0497794
SSBP1	6663.46	-0.183445	0.0186444
TSR1	7944.4	-0.186134	0.0109789
HNRNPF	6684.6	-0.186404	0.00768351
PA2G4	8850.31	-0.187327	0.049561
MRM2	2951.07	-0.188869	0.0115732
PDF	1295.29	-0.191813	0.0432383
QSOX2	2784.49	-0.195805	0.03294
NFX1	3764.77	-0.198936	0.00627363
ELOA	3907.96	-0.201629	0.00457592
BUB3	4309.03	-0.201716	0.0311858
DUXAP8	8045.74	-0.207063	0.00148696
NOP56	9573.94	-0.207686	0.00258621
MAP4K4	13426.5	-0.208572	0.00932552
PRXL2A	2340.36	-0.212282	0.0380667
CCT7	18359.9	-0.21397	0.0366334
TMEM230	10289	-0.215146	0.0258791
ZNF7	1564.13	-0.216089	0.0136473
BFAR	4729.28	-0.218109	0.00382193
ADAT1	2374.9	-0.220495	0.0294982
NEU3	1544.66	-0.220559	0.0212559
MRPS33	2202.64	-0.220954	0.0375773
DHPS	2252.55	-0.222262	0.00646078
RNF149	1382.49	-0.225929	0.0121013
RPIA	1240.07	-0.227028	0.0254054
UTP4	5907.12	-0.231767	0.0451384
POLD2	6626.57	-0.231953	0.0294152
MLH1	2396.68	-0.232698	0.0467951
YBX3	3730.36	-0.234442	0.0117386
FBXO17	1499.14	-0.234818	0.0302578
WIPF1	1839.23	-0.235004	0.0323188
TCOF1	9862.22	-0.238038	0.0114614
ACTL6A	2808.89	-0.238233	0.00876427
TMEM43	7214.22	-0.238447	0.00966892
GUSB	2894.85	-0.238535	0.0263178
ISG20L2	2175.73	-0.23856	0.0475711
ODF2	3894.58	-0.238881	0.00383958
ENTR1	4996.79	-0.239346	0.0139399
RPL6	45697.8	-0.239896	0.00547003
RPL17	27377.1	-0.240058	0.0379491
METTL2B	1796.13	-0.240345	0.0186444
SPAG7	2103.85	-0.24057	0.00547253
WDR46	5956.68	-0.240808	0.0239104
CSNK1E	5056.52	-0.241894	0.00350089
SCAMP1-AS1	798.827	-0.243207	0.0475711
EXOSC2	2807.21	-0.243708	0.000577121
TRIM14	2948.4	-0.244286	0.033738
SSRP1	19588.3	-0.24507	0.00631597
VPS37C	1181.13	-0.245274	0.0423692
RPL31	25986.5	-0.245839	0.0443632
U2AF2	10147.3	-0.246225	0.0350606
PSMC4	5691.91	-0.246374	0.0287881
TOMM5	5140.63	-0.246559	0.0327926
KAT2A	3508.87	-0.246571	0.0211784
EIF2B1	3995.52	-0.247161	0.000266133
SLC25A22	2360.77	-0.247381	0.0444336
C9orf78	3511.31	-0.247972	5.53042e-05
POP5	1281.27	-0.248578	0.0151877
AC022107.1	577.392	-0.249352	0.0412985
PHB2	8408.78	-0.2495	0.0388392
COQ9	2727.95	-0.250852	0.0368003
LARS2	2509.94	-0.251138	0.0420261
PRPF19	12095.6	-0.252571	0.0166529
CCDC137	2193.68	-0.252614	0.0142333
DNAAF5	2856.31	-0.254378	0.0117688
FKBP5	2560.81	-0.256269	0.00547126
MRPS23	2563.61	-0.257189	0.0137852
ZBED4	1607.76	-0.257542	0.00633518
TIMM8A	916.376	-0.260607	0.0210519
MRPS25	2424.72	-0.260753	0.00547253
RPS8	38197.6	-0.261103	0.0268416
HARS2	2149.23	-0.261269	0.000363299
MRPS26	2527.03	-0.261311	0.0183487
MTG1	2244.95	-0.261455	0.0359889
CLP1	1304.94	-0.262488	0.00198397
RPP25	1596.17	-0.263343	0.0193534
VARS	6546.56	-0.263819	0.0363597
RPAIN	1766.99	-0.263955	0.00165481
RPL36A	17414.3	-0.264449	0.0137311
STOML2	9108.07	-0.264543	0.00937302
HSD17B10	2671.36	-0.265113	0.037565
COQ4	1733.72	-0.265321	0.0249061
DAXX	4618.19	-0.265623	0.0363998
MRPS16	2989.27	-0.266789	0.0110096
SNX1	8206.68	-0.267033	0.0381216
AATF	3385.8	-0.268491	0.0160073
SPATA2	1058.01	-0.26851	0.0248847
EEF1A1	626427	-0.268655	0.0162258
RRS1	2053.44	-0.269098	0.0155412
CHN1	893.623	-0.269858	0.046245
TOP1MT	1570.64	-0.270059	0.00224194
RCC1	5720.61	-0.27119	0.0419109
MRPL15	2929.77	-0.274409	0.00191891
AHRR	2060.83	-0.275268	0.0453549
UTP14A	3064.89	-0.276175	0.0334825
NDUFS2	5203.21	-0.277265	0.00217724
GTF3C2	4232.17	-0.278671	0.0111992
THG1L	1892.44	-0.27881	0.0333963
SNHG20	472.835	-0.279191	0.0357716
MOK	1296.65	-0.279383	0.0491822
SFXN4	585.451	-0.279385	0.0451384
WDR12	2415.21	-0.27965	0.0246119
PRR3	2046.72	-0.280016	0.0234418
RUVBL2	6983.22	-0.281051	0.0093739
PATZ1	2235.28	-0.281552	0.0388392
ZNF3	2904.96	-0.281892	0.0293708
RUVBL1	5432.21	-0.282924	0.0168375
RPS27A	29292.2	-0.28347	0.00540892
GEMIN6	1396.15	-0.283742	0.0045609
RPL11	36795.3	-0.284298	0.00440573
PFDN6	2605.55	-0.28446	0.0296987
EXOC3-AS1	613.102	-0.284632	0.0341956
NOC2L	7230.37	-0.28464	0.00129132
RCE1	673.45	-0.284838	0.0150942
FBL	5586.95	-0.285163	0.0403603
TSC22D1	5776.66	-0.285201	0.0155215
UTP25	1455.77	-0.286547	0.000510469
EEF1D	14301.6	-0.289316	0.0295526
EBNA1BP2	5155.5	-0.289743	0.0307495
WRAP73	1404.39	-0.291273	0.00308337
GFOD2	1499.24	-0.29304	0.0413967
IRAK1	19076	-0.293389	0.0413011
FKBP1A	26088.7	-0.293638	0.046019
NPRL2	1001.43	-0.293763	0.0468983
PHB	7327.07	-0.293853	0.0351547
RPS24	15668.7	-0.293864	0.0211784
RPL27A	44327.2	-0.294453	0.0279527
CORO2A	1356.44	-0.294857	0.00263629
NA	707.108	-0.295834	0.0244646
RPL34	13518.7	-0.295907	0.0386051
TIMM13	2178.95	-0.296412	0.0465293
MRPS18B	4057.86	-0.29677	0.0145054
MTMR14	1785.62	-0.297817	0.0289493
RALB	5036.24	-0.29784	0.00314708
PNP	1512.77	-0.298121	0.0426457
ZNF691	543.136	-0.298727	0.023618
QTRT1	1398.97	-0.299355	0.0349493
RPL26	31543.4	-0.29968	0.00205281
COA4	2229.23	-0.30102	0.0332033
CRMP1	630.732	-0.302591	0.00355188
PHF5A	2143.18	-0.303824	0.00152911
ATAT1	537.236	-0.304091	0.00604043
VARS2	1563.73	-0.304437	0.0073979
NFYA	1791.34	-0.30469	0.0057462
BCS1L	1798.31	-0.305229	0.000868976
PPM1F	3912.02	-0.305385	0.0178202
MAX	2278.56	-0.308311	0.0161498
C19orf48	2555.27	-0.308656	0.00336834
POLR3D	3632.78	-0.309056	0.0118148
FZD1	1665.8	-0.310664	0.0491822
RPS15A	28078.1	-0.311254	0.0156976
MRTO4	2839.37	-0.311307	0.0117386
RPS17	42235.3	-0.311795	0.00570015
GAGE12C	12323	-0.312016	0.00114173
ALDH1B1	2870.47	-0.312234	0.00937267
ZADH2	2400.13	-0.312285	2.55357e-05
CLIC1	17383.7	-0.312503	0.0291186
TRMT1	1512.29	-0.31265	0.0427027
PDLIM3	622.703	-0.312778	0.0268503
TOE1	794.476	-0.313026	0.0457751
RALY	10373.4	-0.313037	0.020549
RPS3	78001.3	-0.313813	0.0140217
ZNF772	795.61	-0.314838	0.0361755
PES1	4082.17	-0.315205	0.00298522
RPS4X	33744.2	-0.315994	0.0137393
TMEM177	593.83	-0.316443	0.0205924
POLR1E	2520.91	-0.317226	0.00175518
DCAF4	983.401	-0.31776	0.0114614
WDR77	2537.19	-0.318467	0.00742505
SORD	1813.48	-0.319054	0.0120704
TXN2	3663.45	-0.319304	0.0499722
ATIC	7866.45	-0.319654	0.00762562
RRP12	2494.96	-0.319781	0.0398149
AHCY	11764.4	-0.320183	0.0142333
RPS12	23474.3	-0.320606	0.00172316
BZW2	4791.62	-0.320935	0.0026157
PPIH	1924.71	-0.322127	0.00965604
ASTN2	485.44	-0.322597	0.0385256
2020-09-06	2821.75	-0.322663	5.4595e-07
RPL23AP42	8204.97	-0.322859	0.0454784
EEF1AKNMT	2434.57	-0.323339	0.00275986
CIAO1	6123.07	-0.323496	0.00353103
SPRED2	2021.34	-0.323498	0.0269241
C6orf48	7131.06	-0.324233	0.00570015
RPLP0	75599.3	-0.324309	0.0339145
FARSA	5326.77	-0.324394	0.0156631
CRADD	389.304	-0.324776	0.0491051
LDLRAD3	1672.49	-0.324929	0.0443742
TKFC	1546.53	-0.325392	0.000296667
SP110	1100.57	-0.327608	0.000884709
TMEM208	1264.67	-0.327855	0.030478
C1QBP	10284	-0.327955	0.000217834
NOP10	2112.58	-0.328003	0.00849716
FAM86DP	1360.28	-0.328568	0.0230279
SLC43A3	6224.28	-0.329069	0.000288932
TBX3	4851.96	-0.329271	0.0354645
SNHG6	2615.17	-0.329752	0.00216573
NMRAL1	1468.37	-0.330073	0.0322122
BCAR3	3028.46	-0.330701	0.0485998
PPIF	3038.65	-0.33188	0.0105745
AC090204.1	619.973	-0.331926	0.0105514
RPL30	35678.4	-0.331964	0.00981417
RPL9P9	16918.1	-0.332018	0.0124826
VILL	408.532	-0.332355	0.0388203
FAM89A	912.361	-0.332931	0.0100445
IMPDH2	17822.2	-0.333264	0.00429322
CLDN15	890.743	-0.333545	0.00681457
WDR4	1435.97	-0.334024	0.0304134
ZIK1	840.909	-0.334184	0.0267163
RPS27	26325.2	-0.334674	0.0204523
SMN2	2795.06	-0.335169	0.00570015
RANGAP1	7733.94	-0.335706	0.000508296
DCTPP1	2007.82	-0.335771	0.0382601
CYB561	2861.49	-0.336084	0.00391149
TMEM101	1425.2	-0.336158	0.0487104
PMVK	1036.77	-0.33642	0.00241212
EIF3K	7247.37	-0.336772	0.0199202
RPL8	63923.6	-0.337313	0.0206426
RPLP2	26725.7	-0.337577	0.0419109
RPL24	16195.1	-0.33823	0.012922
RPL27	24671.8	-0.338482	0.0228962
RPS7	42244	-0.338803	0.000175021
MPV17	3093.54	-0.338971	0.0115828
CALHM2	962.522	-0.34039	0.0156674
FBXL19-AS1	285.629	-0.341353	0.0210197
GPANK1	1068.37	-0.343124	0.0282713
ZNF619	453.259	-0.343985	0.0305302
PIM3	1569.13	-0.344053	0.00230385
SAPCD2	1918.01	-0.344183	0.0160193
CSKMT	343.041	-0.34496	0.0325996
FANCE	547.408	-0.345268	0.0160808
PLP2	4682.09	-0.345409	0.0147934
EXOSC4	1304.84	-0.346135	0.0270327
RAB36	529.251	-0.346303	0.029808
AMOTL1	6561.4	-0.346688	0.00597216
MON1A	421.934	-0.347204	0.0177207
PUS3	1045.53	-0.34728	0.0355052
ABHD5	550.925	-0.347733	0.00567361
DPM2	4556.79	-0.347861	0.00201458
RAMP2-AS1	693.291	-0.348109	0.0289603
LIMD2	2211.72	-0.349323	0.0137852
DDTL	284.91	-0.349413	0.0206426
FAM171A1	2363.98	-0.349661	0.0236152
DDX25	1351.78	-0.350006	0.00028731
CROCC	613.005	-0.35005	0.0453892
GPX1	6093.66	-0.351374	0.0437327
EIF3I	10526.5	-0.35249	0.00104117
RPL18	22761.1	-0.352939	0.0346335
UBIAD1	1239.93	-0.35574	0.0118924
RPS2	74595.7	-0.356829	0.0201896
SERPINE2	8188.67	-0.357318	0.0147058
ITPA	3951.47	-0.358843	0.00757175
WDR3	4591.27	-0.359672	0.024958
C11orf1	496.805	-0.360777	0.0169011
APRT	3780.59	-0.363626	0.00391149
CENPBD1P1	1256.44	-0.363907	0.022078
RPL35	27266.1	-0.364037	0.0109875
NHP2	3255.78	-0.364813	0.00823147
RPS6	79859.1	-0.366262	0.000253879
POLR1C	1344.85	-0.366465	1.67678e-05
ZNF135	520.207	-0.366964	0.0133576
IPO4	3946.72	-0.367179	0.00136434
SYT11	517.005	-0.367259	0.0110653
MAP3K1	6834.52	-0.367286	0.00810015
PLEKHJ1	2128.6	-0.367336	0.00414133
RMND1	749.381	-0.368194	0.0272503
NAV2	2387.67	-0.368434	0.0275091
RPL10A	24437.4	-0.368788	0.00129132
RPS19	28332.2	-0.370376	0.00444682
SNHG5	2995.96	-0.370578	0.0155412
CCNB1IP1	4135.16	-0.371954	0.00853146
RPL22L1	2206.74	-0.371962	0.0157084
RPL29	36285	-0.372001	0.037565
CCDC51	1006.55	-0.372678	0.00364527
SRM	3029.64	-0.373696	0.00395177
KLF13	1510.66	-0.373908	0.0374811
RUNX1	2054.8	-0.375076	0.0161498
RPS28	7175.88	-0.375083	0.0436186
TSSC2	633.16	-0.37559	0.0323188
TNFRSF21	5207.6	-0.376424	6.60238e-05
UBL7	4320.44	-0.376996	0.0333963
TSEN2	547.34	-0.377566	0.0491051
GLI3	3529.67	-0.377902	0.00715449
PROCR	2832.56	-0.379102	0.0176889
MGAT5B	1657.99	-0.379816	0.0380424
RPL37A	41742.4	-0.382256	0.0189001
LGALS3	3865.65	-0.382444	0.0013134
PPFIA3	924.099	-0.383169	0.0389026
ILF3-DT	606.322	-0.383528	0.00681147
UCP2	2547.83	-0.384133	0.00466556
TRAIP	640.632	-0.385655	0.0101129
RPL10	91369	-0.385749	0.00717748
EEF1B2	14457.9	-0.385834	0.00206517
RAB3IL1	1180.87	-0.388611	0.0482913
TTLL12	2960.53	-0.389375	0.00119968
RPL19	41793.1	-0.391659	0.000812596
TGFBI	26371.5	-0.392035	0.0117688
MANEAL	1265.67	-0.394521	0.0437687
CDK5	1685.22	-0.394711	0.0155084
ALKBH2	710.507	-0.396261	0.00556992
RPL41	46211.1	-0.396487	0.0070224
THTPA	987.853	-0.396845	0.043419
MDFI	1896.3	-0.399775	0.0267197
PLK2	8444.08	-0.400474	0.00398859
NA	646.921	-0.40185	0.00531918
GAGE13	2562.72	-0.403645	6.5509e-05
CDK4	12333.4	-0.403996	0.00791104
ANKH	6322.17	-0.405436	4.82896e-08
DPH2	2221.52	-0.405536	0.00122204
C20orf27	2903.63	-0.406226	0.00369829
RPS21	23282.5	-0.406335	0.00279396
ATP5MC2	5676.21	-0.409059	0.000353194
SRD5A1	2652.93	-0.41021	1.00665e-08
SNHG29	16413.2	-0.415347	0.000343875
ITPRIPL1	839.37	-0.41545	0.00753329
ARG2	2408.77	-0.415728	0.00644415
AGMAT	377.035	-0.416854	0.00678719
CHGB	280.908	-0.41872	0.0319082
RPL13A	70398.3	-0.418913	0.00933959
SETD9	410.384	-0.418931	0.029708
TRIB2	5941.22	-0.419351	0.0149605
ABHD11	864.583	-0.421073	0.00161098
RPS18	68722.5	-0.4218	0.00128446
IL2RB	1447.94	-0.424599	0.0119434
MICOS13	1664.42	-0.425622	0.00161053
SPOUT1	3020.91	-0.425883	0.00472675
RPS5	32305.5	-0.426363	0.0193224
TIMP3	33487.4	-0.426779	0.0320412
NIP7	3651.69	-0.428554	0.000102301
AC055811.4	242.53	-0.430655	0.0283759
PSENEN	1598.52	-0.432742	0.000610461
PRAG1	3099.32	-0.434931	0.0412666
PRKAR1B	1954.37	-0.435227	0.0204413
PDSS1	287.873	-0.43665	0.0477166
CIB2	420.352	-0.437163	0.0465293
KDM8	224.605	-0.437324	0.0461621
LINC01029	2160.24	-0.437439	0.000224172
CALM3	16638.1	-0.437576	0.00246325
RAMP2	1068.84	-0.438834	0.020739
LINC00665	1946.73	-0.43986	0.00020111
SORBS1	666.907	-0.443867	0.00126133
GAS5	7842.95	-0.445378	0.0389589
FRMD4A	2369.14	-0.448008	3.30471e-05
ZNF551	748.888	-0.44857	0.0268107
NRXN2	691.595	-0.449856	0.0206253
RPS11	38271.5	-0.451288	0.0150831
PAK1	4174.33	-0.451543	9.58015e-06
SOCS2	977.765	-0.451694	0.000314237
SRD5A3	467.331	-0.452511	0.00784675
TMEM204	546.691	-0.452655	0.00554389
RPL18A	25731.3	-0.456363	0.00357841
NOP16	1938.31	-0.457504	0.000791161
AC046185.3	1008.47	-0.460503	1.07811e-06
LAT	302.328	-0.460561	0.0268416
MRPL24	1793.2	-0.461351	2.2104e-05
BCL2L11	920.173	-0.464063	0.00328658
TNFRSF1B	1074.4	-0.464086	0.00070423
FAM78A	383.516	-0.471732	0.00205086
RPS29	12227.2	-0.473078	0.00186956
HPCAL4	258.762	-0.473932	0.0216661
CDCA7L	2435.71	-0.475066	4.66997e-05
ANKLE1	635.535	-0.475131	0.000360556
MLPH	3090.88	-0.481143	0.0121304
SPRY4	1960.93	-0.481353	0.00263629
GALNT6	1395.59	-0.482164	0.0327926
NA	131.428	-0.482642	0.0227829
RPS23	74273.9	-0.483684	3.46911e-05
FMC1	495.7	-0.488266	0.000422566
PAFAH2	548.313	-0.488777	0.0456639
NA	437.056	-0.489612	0.0353172
RTL5	2173.93	-0.489733	2.99323e-06
SPRY2	1269.95	-0.490081	0.000272692
ZNF561-AS1	275.802	-0.490583	0.0323403
P2RX5	672.82	-0.490975	0.00285911
HHAT	280.182	-0.491848	0.00592724
PLIN2	5843.81	-0.49191	0.00380308
PRRT3-AS1	120.337	-0.494947	0.0218232
MAP1A	1216.1	-0.499514	0.0101494
RAP1GAP	474.244	-0.502482	0.0288579
LINC01410	734.487	-0.502502	0.00123861
DPYSL3	1641.15	-0.502976	0.00148687
TNFRSF10A	429.757	-0.503552	0.00549653
SENCR	247.901	-0.506408	0.0025952
P2RY11	313.563	-0.506983	0.012093
MEX3A	1174.64	-0.510327	0.00586855
HOXB9	2074.17	-0.513437	0.00489161
STX1A	710.362	-0.514723	0.000162556
AC027031.2	487.059	-0.515106	0.000124882
LINC00957	360.183	-0.521281	0.0363998
TRIM9	249.169	-0.527003	0.0377156
ACY1	1833.5	-0.528093	0.00644415
CDKN1A	368.888	-0.531218	0.00344317
CCDC78	384.887	-0.534794	0.00419729
STMN3	8539.4	-0.53522	0.000110699
TLL2	230.679	-0.536612	0.0388392
FAM20C	2024.59	-0.538804	0.0177923
MARCKSL1	6894.58	-0.538956	0.00272672
ADM	794.991	-0.539509	0.0259948
NME1	4684.92	-0.539721	0.00065753
TWNK	1717.42	-0.541307	2.2104e-05
CYTL1	1870.47	-0.541565	0.000408166
IL17RD	1697.45	-0.550188	0.0280383
SERPINA5	1276.95	-0.553118	0.0168375
BOLA2	1180.56	-0.554407	5.31077e-05
ZMAT4	504.905	-0.560012	0.0117688
NPAS2	2199.95	-0.560365	0.000466896
TUBB3	3262.46	-0.564962	0.00113958
BTBD11	910.149	-0.567578	3.86792e-07
REEP1	645.671	-0.567681	0.0423692
THSD1	104.941	-0.569178	0.00865048
SNHG19	151.083	-0.583072	0.0111932
ATP2A3	1211.32	-0.583875	2.73982e-05
AC018553.1	92.9537	-0.585628	0.0116586
SNED1	2396.81	-0.58718	0.00207336
FBLN1	4794.02	-0.588509	0.00150007
CPNE7	438.107	-0.589123	0.00664714
NPBWR1	390.845	-0.589899	0.0255864
TTYH2	540.565	-0.593324	0.0363998
NALCN	1270.96	-0.595333	5.41668e-12
SLC37A2	644.402	-0.599356	0.0029887
DHRS12	99.1594	-0.602341	0.0443587
SBSPON	767.099	-0.603918	0.00277035
DNER	848.222	-0.607726	0.000157016
TUBA1A	19721.6	-0.610622	0.0347091
CNIH3	994.904	-0.613016	0.000678369
CDKN2B	1954.88	-0.622043	0.0396951
TUBB2B	4106.08	-0.624528	0.000671046
ENOX1	275.262	-0.633413	0.0130926
PALD1	72.2317	-0.636739	0.0328676
HECW1	564.358	-0.639365	0.000934611
EXOSC5	1246.92	-0.64163	4.13429e-05
CDK5R1	277.142	-0.645198	0.0104381
NTRK1	102.252	-0.646559	0.0223468
LRRC17	2568.19	-0.648523	0.00286837
BBC3	539.552	-0.649621	0.000110699
PMEPA1	367.612	-0.655121	0.0116586
ID3	8443.25	-0.656389	0.00259945
UBXN10	251.979	-0.66106	0.00056721
GMFG	271.705	-0.661182	0.0126766
SHISA2	384.905	-0.661404	5.18171e-05
ARL9	148.419	-0.667377	0.00681007
CHST2	604.923	-0.667889	2.45051e-13
UNC13A	437.125	-0.668345	0.0058855
AL645608.2	67.2758	-0.68141	0.0386051
LCTL	194.673	-0.687906	0.00772485
USP2-AS1	184.375	-0.693636	0.0102542
DUSP5	787.259	-0.695421	0.00933959
RAB7B	81.3078	-0.698526	0.0377156
AC011476.2	111.02	-0.699643	0.01363
SPANXC	1478.43	-0.700539	0.00572115
HLA-DRA	272.073	-0.701275	0.0419109
TMEM145	253.206	-0.70468	0.00329096
FXYD6	2385.94	-0.705266	6.60884e-05
SIGLEC15	122.836	-0.705966	0.0332399
PPP1R16B	527.74	-0.70913	0.00497257
NRROS	203.48	-0.711901	0.00285911
FAM78B	308.797	-0.713459	0.00159607
VCAN	908.197	-0.721264	0.0251192
BSN	168.592	-0.721704	0.00259945
COL6A3	4751.93	-0.722642	0.0186444
LINC01366	70.3087	-0.723248	0.0156631
PLXNA4	515.422	-0.726103	0.0121013
PRR7-AS1	73.1169	-0.727336	0.024991
PRDM13	87.3403	-0.730881	0.021606
BEX1	1622.38	-0.737129	2.51967e-08
C2orf70	148.951	-0.747444	0.0213604
AC008622.2	52.9246	-0.751338	0.0311773
NKD1	470.674	-0.75334	0.0253279
FAM155B	469.104	-0.753399	1.23753e-07
LFNG	282.262	-0.759872	0.000162537
NOX5	244.056	-0.76487	0.00291003
CEMIP	1148.67	-0.765869	0.00265145
TMEM59L	339.134	-0.77931	6.32556e-05
RGS14	562.791	-0.789017	4.40011e-07
CRYBB2	39.3027	-0.79564	0.046764
LAMP5	323.578	-0.805617	0.000166614
COL8A1	2277.35	-0.811097	0.000840576
MYC	932.684	-0.812317	0.0424066
ARHGAP9	264.066	-0.812516	0.00014927
TMEM200A	540.674	-0.814663	3.12957e-06
PLP1	431.182	-0.819298	0.00562267
AC010970.1	17518.2	-0.827387	0.00310616
AC096537.1	58.4826	-0.832188	0.0368072
ANGPT2	85.4312	-0.838797	0.0230961
PTX3	4981.99	-0.843698	0.000192788
LPAR1	468.041	-0.849133	1.36901e-05
NPIPA7	80.1596	-0.863881	0.0440045
GAL	58.6827	-0.8669	0.0443632
ESX1	1145.55	-0.876878	1.71447e-05
PQLC2L	60.0041	-0.882353	0.00762174
BPI	155.934	-0.888862	0.00616875
AC247036.1	655.366	-0.897272	4.13429e-05
PCDH12	238.254	-0.898721	0.00472291
IGHV3-19	30.1424	-0.902736	0.0314697
ADCY1	191.093	-0.915556	0.00286837
PLPP4	110.752	-0.916487	0.00283748
QRICH2	106.356	-0.923919	0.000967926
ITGA10	182.67	-0.924342	0.000290012
KCNK13	67.7706	-0.925499	0.0279775
SMOC1	69.5386	-0.925724	0.0151877
PLCB4	1544.33	-0.932509	5.84085e-05
DRD2	181.345	-0.933802	0.000126221
THBS2	4772.08	-0.934731	2.0419e-07
SLC22A18AS	118.35	-0.935539	0.00749215
EIF4EBP3	143.578	-0.942447	0.000278036
TIE1	3876.16	-0.944182	2.95574e-12
PIK3R5	80.6138	-0.950917	0.00272672
SYP	149.722	-0.957441	7.49292e-05
GPM6B	424.381	-0.959226	0.000102542
UBE2QL1	493.862	-0.966034	6.53389e-06
MIR4527HG	177.578	-0.967579	4.78401e-07
CUX2	98.4532	-0.978326	0.0446571
EDN1	1541.88	-0.985163	0.000154263
SPOCK2	70.0781	-0.988753	0.0305227
ADAMTS14	70.3509	-1.00147	0.0253279
SYT13	311.087	-1.01811	0.00722929
CLEC3B	312.942	-1.02531	0.0184664
FST	410.437	-1.03338	0.00576818
RGCC	105.66	-1.0512	0.036741
IGSF9B	83.0275	-1.05295	0.0206426
CFP	142.794	-1.07961	0.000313862
ATP2B2	75.4334	-1.08359	0.0156631
SIGLEC17P	28.7031	-1.11939	0.0264067
RUBCNL	166	-1.1361	0.00581095
CXCL8	99.7197	-1.13625	0.0386126
SLC4A5	33.4936	-1.15362	0.0152362
FLT4	134.851	-1.15773	0.031033
TMEM163	27.6128	-1.18863	0.0357316
ME3	73.9769	-1.19559	0.0109566
KCNC1	90.0551	-1.20215	9.14838e-05
CHD5	93.8603	-1.211	0.0106492
CRLF1	1052.3	-1.21134	4.89333e-18
GNG4	685.054	-1.21798	2.60098e-13
LCP2	54.8825	-1.24825	0.0025952
VGF	785.821	-1.24962	5.78621e-08
ATP6V1G2-DDX39B	701.832	-1.26544	0.0312476
TMEM233	90.4513	-1.28704	0.0110965
RGS7	47.6613	-1.31654	0.0034372
NPTX1	3190.58	-1.34943	3.27656e-12
GALNT17	25.5534	-1.34956	0.00432508
SNORA71C	20.6894	-1.37677	0.0136407
SNORA26	19.2884	-1.38964	0.00549556
CREG2	57.3182	-1.42181	0.000510469
SCG2	992.041	-1.42612	9.84852e-08
KRT75	23.2957	-1.44046	0.0211784
PRICKLE1	152.584	-1.45191	1.85732e-07
LRRC18	14.9253	-1.45955	0.0430267
F13A1	43.4363	-1.48523	0.0200817
DHRS2	1627.92	-1.49764	1.71909e-07
GLP1R	28.9228	-1.49805	0.000610428
DCT	247.329	-1.50214	2.88264e-09
TF	518.88	-1.50237	3.39514e-09
LAIR1	55.8696	-1.50566	0.0319481
KCNQ2	12.2646	-1.50662	0.0364689
LYZ	14.0404	-1.50851	0.0478019
TRBC2	122.217	-1.52767	2.5778e-06
CASC8	11.895	-1.52791	0.0311773
GABRA2	53.377	-1.53004	0.00206416
ACTL8	26.2368	-1.53646	0.0111932
CAPN6	166.405	-1.56763	6.25131e-07
ACTBL2	62.3757	-1.59429	0.0029887
DRAXIN	93.6047	-1.6273	1.98235e-09
IRX4	106.604	-1.62992	1.45946e-07
MMP9	160.912	-1.63457	1.81899e-06
DKK1	937.757	-1.65653	6.64955e-17
ANK2	166.382	-1.6581	0.00100693
UBXN10-AS1	15.0361	-1.66649	0.0029887
C16orf89	40.3313	-1.7071	0.00536623
HSD17B2	349.729	-1.71432	1.49122e-08
AC099066.2	26.0768	-1.728	0.0143363
CHI3L1	17.4632	-1.73678	0.0320078
PTPN22	24.4563	-1.74034	0.0136502
TRIM67	26.9508	-1.74176	0.00318276
UNC5C	16.0469	-1.75636	0.020445
TYRP1	289.056	-1.82645	2.85101e-31
STK32A	19.6946	-1.84202	0.0364078
CYP24A1	230.735	-1.95078	5.03713e-15
GABRR1	17.1186	-1.95345	0.00256353
KIAA1755	395.007	-1.96184	0.000278036
LINC00589	13.0296	-1.97257	0.00810015
MMP1	74.3668	-2.00425	3.54893e-05
EPHB1	77.5404	-2.09944	0.000352501
TNFSF18	594.857	-2.09994	0.0104364
LRRTM2	15.2225	-2.13839	0.00664714
AL441883.1	18.7758	-2.19425	0.0050789
RAB3C	13.436	-2.75881	0.00340803
AC018521.2	17.2077	-3.05275	0.021815
PCDHGA11	39.1976	-6.08893	5.85021e-05
AC022149.1	85.0236	-9.81345	0.010106
AC087164.2	292.38	-15.281	0.000414943
AC093668.2	22.0225	-30.1134	2.56574e-05

## Sheet: DEgenes_SW872_CAMTA1_vs_subEV
Gene	baseMean	log2 Fold Change	padj
AP003419.1	46.0143	19.1619	5.10164e-08
NA	14.627	6.81365	0.000250261
NA	14.4423	6.35791	0.00196192
NA	14.13	6.33241	0.0453304
MAGEL2	23.8992	6.27954	2.15143e-18
NEFL	99.3576	5.05819	4.4774e-41
AC233968.1	53.1855	5.0436	0.00777685
KRTAP2-3	13.1497	4.95871	0.0149967
ATP1A3	357.023	4.62161	5.49344e-97
SV2C	14.2966	4.22548	0.0391428
CDS1	52.3163	4.02626	1.20228e-23
NAP1L2	60.8626	3.66775	1.99628e-23
S100B	57.729	3.42019	3.97724e-34
LINC00632	86.5282	3.36679	6.16409e-37
CDR1	15.9678	3.3354	1.82994e-06
SNORD116-24	8.3827	3.27439	5.13562e-05
SNORD116-6	8.65721	3.04107	0.00120239
VGF	785.821	2.74005	1.047e-45
AC124312.2	11.8829	2.69217	9.58429e-05
BEX5	103.9	2.68339	1.03788e-33
MAGEE1	540.123	2.67441	7.94845e-45
H3F3AP4	420.906	2.67426	4.8038e-14
PNMA3	556.706	2.6588	8.59526e-164
MAP1A	1216.1	2.6432	2.7783e-74
SNORD116-1	8.9862	2.632	0.0015736
MAGEE2	17.348	2.62696	0.00013611
MUC5AC	33.8583	2.53571	1.69554e-06
NA	106	2.53286	1.34128e-15
DNAH8	13.8646	2.52182	0.000184604
AC124312.3	178.088	2.41457	6.43844e-49
SNHG14	4449.32	2.39814	3.1171e-79
MCF2L	207.916	2.38739	4.03299e-12
PWAR5	61.8606	2.35602	3.07447e-07
ELF3	19.1928	2.31412	0.000410046
SNCAIP	91.6125	2.30613	3.3066e-10
ALDOC	1821.66	2.28536	9.44289e-06
MIAT	450.508	2.26995	6.91928e-19
NA	82.9531	2.25387	1.69856e-25
SNRPN	5362.88	2.16607	3.31609e-129
MT-TF	12.0634	1.98776	0.0245107
STARD13-AS	15.3575	1.9706	0.00370777
SNORD116-4	18.0085	1.9221	0.000195261
NPPB	2240.65	1.91482	0.00036145
MAP6	112.028	1.8411	9.90051e-09
HAND1	50.7372	1.78292	0.00157417
LGI3	21.1673	1.76193	0.0138046
KRT15	92.3294	1.75359	3.53008e-07
ABCA3	301.312	1.67635	1.03181e-10
NPIPA7	80.1596	1.65988	4.2838e-06
SNURF	237.102	1.6534	5.24067e-09
PHOSPHO1	77.1519	1.61159	9.47191e-06
EPB41L3	354.376	1.59999	6.96116e-17
AC006449.7	76.3905	1.57918	0.00228796
SCARNA9	19.2874	1.56879	0.022199
NEFH	4344.74	1.56756	2.7783e-74
MT-TQ	46.6997	1.53733	0.00376543
AHNAK2	1587.71	1.51638	2.00984e-18
TMEM151A	32.3752	1.47205	0.00654854
CUX2	98.4532	1.46465	0.00257858
LRRC15	26.2921	1.46123	0.0355977
GDF5	28.6934	1.45467	0.00845249
LBP	19.2295	1.45381	0.0434034
PRND	26.1639	1.43965	0.022993
CORO2B	318.216	1.42216	7.57226e-20
SDR16C5	42.3869	1.38419	0.00361493
AIFM3	126.063	1.37909	6.76284e-08
CXCL14	171.486	1.37449	0.00225971
WNT7B	200.41	1.34295	0.000965221
KIF5A	324.996	1.33782	4.87083e-06
NFASC	750.118	1.32209	6.86258e-34
PAK3	94.8175	1.31777	0.0135461
AC022966.1	180.226	1.30869	0.0183078
SNAP25	73.2666	1.30435	0.0174494
AL645608.2	67.2758	1.29977	0.000168758
EEF1A2	5981.38	1.29631	3.46261e-26
NEFM	79.5989	1.28833	0.032552
RASGRP2	175.004	1.26347	3.53467e-08
ACKR1	26.7664	1.24304	0.0170628
TRO	3618.31	1.24259	8.29203e-20
SLIT2	273.219	1.22358	2.32179e-11
SCN1B	334.46	1.21647	1.02847e-08
ALPL	124.545	1.21397	5.04287e-08
AL139289.1	27.9095	1.21097	0.0220611
LYNX1	851.756	1.21003	1.44362e-10
AC100793.3	34.3818	1.20698	0.028447
COL7A1	231.364	1.19394	0.000636821
AP001107.4	33.3153	1.18265	0.0069299
SYT2	35.3264	1.17078	0.00759393
REEP2	551.738	1.16175	5.85233e-17
ASPHD1	246.008	1.15982	4.67431e-21
LYPD1	36.7651	1.1495	0.00777685
CNTNAP3	149.245	1.14474	1.64634e-06
MTND1P23	155.905	1.14222	4.27867e-05
PTPRN	673.399	1.14053	6.65329e-08
MAP1B	20810.4	1.13866	7.9491e-08
NEGR1	205.265	1.13207	0.0165545
CNTNAP1	3759.39	1.13179	1.7538e-27
VCAN	908.197	1.12417	0.000126667
TUBB3	3262.46	1.11977	4.30374e-14
NTSR1	30.5016	1.11654	0.0140216
HLA-DRA	272.073	1.10977	0.000315528
ADAMTS6	290.362	1.08524	4.25256e-09
AC016026.1	401.403	1.08457	2.40958e-09
HLA-DMB	409.405	1.08403	0.0269134
TRIM36	230.9	1.08363	5.8757e-11
CADM3	1193.86	1.08045	4.86296e-10
ARL4C	1081.7	1.05829	1.88215e-13
ATP13A2	2347.33	1.05751	9.9015e-29
VWA7	89.1171	1.05573	0.00648016
CALB2	75.5926	1.01732	0.000272813
CDK5R2	57.6406	0.998954	0.0480418
LINC02600	73.1274	0.998101	0.00107445
BEND6	355.999	0.994668	0.00346143
CD74	214.508	0.992849	0.0462662
BMF	718.429	0.99282	7.80814e-08
RALGPS1	346.672	0.99276	0.000193
AL662797.1	102.126	0.991012	0.032396
AC008735.2	41.9864	0.985584	0.0355977
CDH2	355.868	0.97648	8.04723e-05
RARRES1	136.061	0.974142	0.00968587
SLC25A48	75.472	0.966247	0.0152928
GPRASP2	355.014	0.961451	3.49192e-16
CCNDBP1	1210.78	0.958573	6.44307e-29
FHOD3	292.607	0.957897	6.19621e-08
MAGED2	15306.6	0.953784	1.37002e-10
SCN4B	2747.62	0.949728	0.00016903
CD24	529.119	0.926166	0.00013611
GPT	53.4859	0.918659	0.0453304
LINC02593	656.239	0.917404	0.0404452
FO681492.1	191.839	0.91643	0.0194259
RN7SL2	1281.45	0.902843	0.0263517
CCN1	10596.6	0.90135	1.14233e-13
B4GAT1	2676.55	0.900267	3.37237e-06
WNT9A	123.586	0.889646	0.00111946
LINC00707	90.4537	0.886536	0.0385636
AP006284.1	314.25	0.881578	0.0414535
CDH4	706.331	0.880277	0.00134283
RF00017	34.869	0.876104	0.0336282
THBS1	3896.64	0.871849	3.61558e-13
SCN8A	851.231	0.871685	2.97685e-05
IDS	4286.44	0.87058	4.12428e-21
COL12A1	7146.72	0.862309	9.90051e-09
MT-ND6	16357.5	0.855454	0.000627572
AHI1	978.939	0.854902	0.00110412
PRICKLE1	152.584	0.853312	0.0140216
ADAM22	711.2	0.852908	4.39714e-05
C2orf27A	102.382	0.847681	0.00127259
LINC00893	98.4657	0.84735	0.029806
KBTBD11	254.488	0.84392	1.7194e-11
ACKR3	110.635	0.843122	0.0313456
PTCH2	132.698	0.841456	0.033037
CCN2	8122.71	0.839559	0.000944926
PRDM1	260.728	0.833436	0.0460756
DYNC1H1	30557.3	0.826255	1.95863e-19
CFB	187.485	0.820954	0.016233
PDZD7	149.196	0.820774	0.00107091
DPYSL3	1641.15	0.81759	5.24067e-09
ZNF497	162.711	0.815698	0.0383397
KRT81	3638.58	0.815032	0.0156921
ANXA6	16028.1	0.80715	2.11889e-06
TNFRSF11A	99.8769	0.804212	0.0279093
SLC26A10	106.117	0.796685	0.0288297
ESYT1	9950.81	0.792275	6.12086e-13
AC009336.2	199.866	0.7915	0.0329639
MT-ND5	72234.2	0.785502	0.000371591
SYP	149.722	0.776976	0.00289297
SH3RF2	238.264	0.772803	0.0029292
VIPR1	332.11	0.771865	1.07243e-05
IL2RB	1447.94	0.770893	6.86127e-08
FBLN5	552.294	0.767557	0.0282506
TMOD2	1004.64	0.763425	0.002842
SPTAN1	27548.3	0.762043	3.92741e-25
AC012313.2	95.1422	0.753384	0.0151176
EDN1	1541.88	0.752815	0.0135461
PREPL	3920.91	0.751537	5.2615e-05
LRIG1	1253.71	0.747993	4.77023e-14
AC139768.1	342.399	0.738802	0.0015736
LY6G5B	240.247	0.730347	0.00111512
STRA6	466.776	0.72995	0.0069299
KRT80	1730.68	0.729908	0.00357953
AC015813.1	221.271	0.727373	0.0261028
CPNE7	438.107	0.723568	0.00038002
PPL	285.507	0.721315	0.023152
NA	45.1788	0.711777	0.0374894
LINC01638	242.897	0.706091	0.00845249
KLC2	1774.58	0.702457	1.352e-08
PDZRN3	211.359	0.698825	0.00216813
MMP25	133.664	0.693962	0.0429528
SYNC	139.347	0.689887	0.00300154
CD99P1	133.577	0.683443	0.0220611
NA	221.03	0.680128	0.0254507
AC139256.1	185.113	0.678979	0.00616543
MT-ND1	34633.6	0.663099	0.0185949
FHDC1	144.914	0.656918	0.0427634
MLLT11	927.879	0.653501	3.32919e-07
LPCAT4	1464.73	0.652875	0.00171832
HOXA-AS3	169.371	0.652867	0.0257306
AC244197.3	405.601	0.65259	0.00444196
LZTS3	1797.58	0.643712	1.3133e-13
SH3BP4	4262.93	0.642109	1.16159e-08
KIAA1841	487.91	0.639271	0.000517621
SEMA5A	1442.93	0.632505	0.0015736
AMOTL2	5194.21	0.631484	1.74095e-08
MAST1	367.305	0.628331	0.00982785
AGRN	19104.9	0.625132	2.3468e-05
PDGFC	565.398	0.624199	0.00228796
MFAP4	931.002	0.621725	0.00466489
NACC2	1511.71	0.621724	6.76141e-10
CLU	7930.29	0.608337	4.67949e-05
NPIPP1	408.712	0.602956	0.000139573
TMEM158	357.809	0.60088	0.0263403
YJEFN3	352.218	0.59998	0.0102352
UBE2QL1	493.862	0.59722	0.0117624
CKMT1B	286.883	0.590466	0.0287063
MT-RNR1	32125.3	0.590022	6.19156e-05
NA	437.056	0.584873	0.00504156
AC011448.1	195.997	0.583068	0.0323388
TMSB15A	178.066	0.581503	0.00782932
DENND2A	3519.22	0.580409	0.000352288
CALM3	16638.1	0.579585	2.81521e-05
PEG3	8882.77	0.57744	0.00127201
MDN1	7460.91	0.570824	0.0102793
ADRA2C	237.924	0.569354	0.0217941
AC010761.2	141.55	0.569266	0.0173399
NA	365.863	0.565066	0.0251971
DNM1	2280.33	0.56341	2.91265e-07
MOAP1	1235.4	0.562395	2.61703e-09
AKAP12	6631.63	0.562344	0.000464888
PLA2R1	868.558	0.554377	0.00260674
CYP26A1	160.804	0.551329	0.0408936
ARMC5	983.296	0.547552	0.000130147
FAM20C	2024.59	0.546331	0.0277157
PYGL	5642.23	0.544213	1.04732e-19
KIAA0408	379.628	0.544138	0.0420957
FHL2	2309.55	0.538809	9.25226e-05
SLC6A6	5652.7	0.53545	2.65399e-05
SULF2	7414.45	0.532454	1.06749e-08
TRNP1	1601.23	0.519354	0.00887973
UBR4	15901.6	0.519129	3.91809e-08
LPXN	808.536	0.518268	0.0414535
PALM3	604.262	0.510056	0.0475895
NBL1	2346.53	0.508895	0.00522841
DOCK4	1431.18	0.50801	0.00159262
PIK3CB	1228.52	0.505373	1.37074e-05
TRIO	14689.8	0.50455	1.47214e-06
PPARGC1B	475.611	0.503947	0.0308959
NA	105.204	0.501284	0.0361683
AC138969.1	3388	0.500354	0.00472179
ATP9A	5110.68	0.500205	8.74346e-08
HSF4	604.427	0.494683	0.00451152
MMP2	12012.5	0.492733	0.0133979
PKP2	1275.45	0.4904	0.000465426
GFPT2	1047.08	0.488854	0.0313034
NAIP	402.071	0.482118	0.012677
PLK2	8444.08	0.48098	0.000566107
NBPF20	948.114	0.480529	9.81204e-05
PLEC	19438.9	0.480375	0.000109065
LAMA5	8544.46	0.477394	0.014272
PYGB	11837.4	0.476872	3.93554e-07
GZF1	2171.95	0.475477	0.00038002
AHNAK	122265	0.475198	1.77853e-06
DSP	1365.6	0.475138	0.00249883
STMN3	8539.4	0.471323	0.00234709
CDCP1	1149.15	0.467446	0.025848
C11orf45	327.087	0.467122	0.0425084
NA	213.937	0.465416	0.0304636
PNMA6A	795.946	0.465023	0.0261057
TYRP1	289.056	0.464692	0.0222651
MYH9	39701.7	0.463504	0.000371591
CARD19	976.325	0.461495	0.00167273
DBNDD1	1129.44	0.460622	0.0306776
GPRC5A	3645.52	0.457434	0.0306776
PRCP	7324.05	0.455604	0.0044663
CHST11	1000.87	0.454358	0.0326176
ADAMTS15	608.323	0.453842	0.00654854
CAMKMT	213.863	0.45192	0.0445854
SLC9A7	825.091	0.451043	0.0214021
STARD13	1275	0.447558	0.0402986
ELOVL4	381.948	0.44425	0.00926915
SDK1	1217.64	0.442015	0.028447
NA	400.617	0.440166	0.0216005
PXDN	21810.7	0.436604	3.55908e-06
CNNM1	541.065	0.43571	0.00456061
TACC2	880.447	0.434622	0.0316145
SRRM2	25535.8	0.433822	0.000123733
NBEAL2	1699.57	0.432111	0.0313456
DENND5B	1132.68	0.430471	0.000308544
MT-RNR2	147787	0.426785	0.0219879
CALM1	7582.07	0.42242	7.7692e-07
SIPA1L2	2095.32	0.421723	0.00827188
MC1R	850.794	0.420522	0.00106379
MYH10	12958.4	0.419229	3.60069e-08
UGCG	4030.04	0.418716	0.0135461
VLDLR	1352.48	0.418609	0.00163724
ANPEP	1081.19	0.418546	0.00698982
FLNB	29152.8	0.418535	0.0372853
EPDR1	1988.55	0.415064	0.0113169
KLF6	4088.68	0.414716	0.000402437
HIVEP1	1633.65	0.414501	0.0317609
MACF1	17521.8	0.413542	1.89915e-08
TBC1D4	1063.76	0.41238	0.0284064
TSC22D1	5776.66	0.412318	0.000166741
TMEM131L	1289.72	0.411867	0.0113379
DDX24	7689.58	0.411186	0.000229765
PLXNB1	1364.59	0.410358	0.0335774
VAMP1	983.997	0.405147	0.0246059
TTC19	2471.21	0.404287	3.18877e-08
RWDD2A	631.528	0.403826	0.00204478
NBPF19	1631.62	0.401671	0.00167502
PPP3CA	1295.71	0.398243	0.0292142
FAT1	14154.5	0.397143	0.00868482
PIF1	875.719	0.396808	0.033252
CAMTA1	1421.58	0.396604	0.00322264
NPIPA1	2359.42	0.395312	0.00167273
GUSBP11	471.383	0.394558	0.00358009
DOCK9	3479.8	0.394409	0.0181351
SH3PXD2B	1746.19	0.392788	0.00155274
COLEC12	3956.51	0.392508	0.00831638
MIR4435-2HG	2097.29	0.390896	0.00361493
CEP250	4914.9	0.39009	4.23967e-05
ELMSAN1	2538.05	0.389296	0.000356892
HOTAIRM1	1189.09	0.389191	0.00381465
SYT17	533.479	0.387922	0.0356925
NEURL4	2079.6	0.387499	0.0481232
XYLT1	2293.66	0.385916	6.92829e-05
MAP2K4	1534.37	0.385225	0.000636821
PDLIM5	3144.82	0.384875	0.0462712
SLC25A28	399.421	0.383218	0.0356925
PFKP	5727.14	0.382195	0.00865383
MB21D2	492.152	0.377955	0.00786498
FOSL2	5985.01	0.377751	0.0147602
PRKDC	32717.1	0.373471	0.000308544
NAV2	2387.67	0.37228	0.0419764
NBPF10	2314.64	0.371273	0.0065943
EZR	9411.26	0.365516	0.000979931
CCDC92	1103.16	0.360501	0.00865383
CTSZ	14220.5	0.359495	0.0138046
RAB30	961.611	0.357795	0.0425084
ABL2	2982.84	0.356465	0.0251784
MLST8	2699.89	0.352289	0.025561
SERPINB9	1503.78	0.348188	0.000475899
HOXA1	545.361	0.346421	0.0382439
NAT8L	892.835	0.344183	0.0371054
ATP2A2	12810.8	0.344078	0.00036145
LUZP1	6874.52	0.342265	4.02985e-06
ANXA4	2729.47	0.342126	0.000446602
SON	15233.2	0.34194	0.0148864
MICAL3	4913.97	0.339814	0.000359996
PTPN14	5617.29	0.333006	0.000194834
ARID5B	1968.66	0.328189	0.00257858
AKAP13	5307	0.327012	0.0128153
CCNO	490.414	0.32368	0.0371054
STK36	1396.33	0.321263	0.0358068
TSPAN18	4006.49	0.321259	0.0211115
ZMIZ2	2157.7	0.318315	6.87233e-05
NOTCH2	14889.5	0.317295	0.000773106
NBPF15	3036.58	0.315477	0.000411672
CRMP1	630.732	0.315466	0.00306517
ZMIZ1	3413.46	0.315417	0.00410745
PDP1	2884.76	0.315196	0.0325025
MAN2C1	3192.37	0.307175	0.0282986
EPHB2	2544.09	0.306593	0.0372755
IFI27L1	506.881	0.305384	0.0356925
USP22	19092.3	0.303703	0.00125634
INPP5E	1157.46	0.303028	0.00773907
PRRC2C	9875.15	0.302952	0.0148463
STK39	1510.73	0.300306	0.0447504
HEG1	10780.5	0.299554	0.00289297
HUWE1	25381.8	0.298948	0.00065367
ACOT9	3014.29	0.297685	0.0173562
BTBD11	910.149	0.293065	0.0402195
GON4L	2736.6	0.289772	0.00370777
KMT2A	10311.7	0.289035	0.0197968
SRRM1	3120.31	0.288431	0.0306776
NRBP2	1261.71	0.287506	0.0445315
BCOR	2863.83	0.28685	0.0301097
FAM193B	1060.69	0.285694	0.0172306
EP400	4945.29	0.285517	5.13562e-05
IQSEC1	2478.42	0.285395	0.011176
FOXK1	3559.33	0.28383	0.0140216
EGFR	7757.38	0.282225	0.000991787
MSTO1	1555.26	0.279133	0.00296494
ABCC4	5268.94	0.27911	0.0251784
CAST	16713	0.277755	2.90764e-05
IFT172	1439.98	0.276486	0.0353893
ENC1	10344.2	0.276441	0.0455105
ANKMY2	1123.61	0.273505	0.0371054
PTPRJ	3731.3	0.264915	0.0104912
DPYSL2	5563.38	0.2636	0.0173399
PARN	3180.36	0.262764	0.00512066
SZT2	2700.47	0.260635	0.00575347
IMPDH1	3474.01	0.258633	0.0453304
NID1	12845.4	0.254055	0.0216707
AKAP8L	2144.84	0.246417	0.0466934
TRRAP	9853.59	0.242874	0.00503031
PITRM1	3121.36	0.241891	0.0397452
PNMA1	2633.57	0.241486	0.0111706
SPTBN1	22759.7	0.236779	0.00107091
SLC23A2	3962.86	0.236396	0.0069299
ESYT2	7763.82	0.234677	0.0374894
EP300	4842.32	0.231902	2.08507e-06
TRAM2	9655.07	0.212162	0.0353893
HIPK2	6086.85	0.205072	0.0360087
NDUFS1	6300.48	0.200995	0.00571444
RNF145	10583.2	0.200696	0.000886103
NOP56	9573.94	0.197884	0.00895896
RIC1	2976.27	0.187303	0.0279422
SPEN	5159.91	0.157798	0.0318523
TUSC3	4463.58	-0.181482	0.0475474
PRKAG1	3564.97	-0.182889	0.0282506
DYNLL1	9168.52	-0.187613	0.0391371
TMED10	13060.6	-0.203929	0.0356925
FUCA2	6047.72	-0.206052	0.0419837
TXNDC12	4250.37	-0.224334	0.0473685
CNIH1	3853.02	-0.228705	0.0194259
ZCRB1	2337.24	-0.230063	0.0434034
SPCS1	3376.4	-0.247317	0.0267574
MAGEA10	7039.29	-0.250297	0.0195664
PHYH	939.277	-0.252112	0.0433128
HIP1	8387.05	-0.263548	0.0347195
BIVM-ERCC5	1830.66	-0.265491	0.047322
SDCBP	7542.18	-0.26859	0.0156396
NEK9	9405.28	-0.271913	0.0246059
AC046185.3	1008.47	-0.2728	0.028447
PLPP5	1498.64	-0.274239	0.0181351
TPT1	67889.2	-0.274582	0.0181351
DDX25	1351.78	-0.275164	0.0190453
PPIC	3752.1	-0.275498	0.016539
GALK2	1013.1	-0.276709	0.00354776
CYBRD1	6049.06	-0.280861	0.010062
SMARCA1	5733.87	-0.281978	0.0114627
MAGEC2	3875.24	-0.284194	0.013799
TMC6	4347.1	-0.288622	0.0185377
FAR2	1062.33	-0.290998	0.0471891
MRPL52	1805.22	-0.305177	0.00492701
TOMM7	3903.64	-0.305907	0.0427555
RAD51D	1062.32	-0.312409	0.0277157
SRGN	1547.78	-0.312507	0.000144397
FP671120.2	584.442	-0.314346	0.0471891
PLCXD1	1585.89	-0.317521	0.011656
CMC4	890.855	-0.318437	0.0374894
DHRS4	1323.07	-0.323087	0.0150813
PMVK	1036.77	-0.323156	0.00772627
MED28	3238.86	-0.328833	0.0358594
KRBA2	422.187	-0.332296	0.0468558
HEXB	16325.6	-0.33267	0.00889364
PDLIM3	622.703	-0.332741	0.025561
KHDC4	2471.68	-0.333617	0.0227284
ELOVL2	1985.73	-0.336526	0.0488372
ZNF721	490.772	-0.336608	0.0211115
CKB	5181.81	-0.337514	0.0197968
C19orf25	1676.96	-0.339528	0.0303135
KAT2B	1031.11	-0.341807	0.032396
MTSS1	1117.76	-0.34349	0.0471891
GALNT14	1213.51	-0.34856	0.0421162
CT45A5	774.929	-0.349641	0.0027643
PRICKLE3	449.079	-0.35235	0.0462662
LPIN2	5759.96	-0.352504	0.019061
GSR	4194.45	-0.355531	0.00102548
TTYH3	13892	-0.356033	0.021824
P2RX4	1389.15	-0.358168	0.0246059
AC008969.1	361.744	-0.366153	0.0429596
AC074117.1	550.527	-0.370764	0.0274066
BLVRB	2573.36	-0.372096	0.0248451
ARMC9	2187.71	-0.372218	0.0015736
AGMAT	377.035	-0.373783	0.0323388
DAPK1	5388.26	-0.37489	2.19462e-05
HACD4	437.475	-0.3768	0.0150813
CSKMT	343.041	-0.37729	0.0319164
HSPB8	1436.39	-0.379469	0.0496283
TXNDC16	735.2	-0.383515	0.0133979
ACVR2B	614.633	-0.385246	0.0349014
FKBP14	2076.4	-0.388231	0.019219
CRACR2A	437.602	-0.388234	0.0073082
CHST2	604.923	-0.391674	0.000236669
SPCS3	2551.18	-0.395332	0.00889364
DPP7	4715.1	-0.39574	0.0288443
DDT	2299.73	-0.396976	0.0081511
PROCR	2832.56	-0.399694	0.0246059
TMEM35B	784.729	-0.400253	0.000165207
FRG1BP	884.454	-0.403681	0.00150338
ITGB3	1822.99	-0.404325	0.0447504
CPE	2379.93	-0.404619	0.0453304
HES6	712.978	-0.406844	0.0192333
PFN1	38626.7	-0.406979	0.0185949
LDB2	2892.95	-0.408119	0.0115064
TUB	3581.77	-0.409796	0.000465426
C11orf71	513.733	-0.412277	0.0201401
TMSB4X	28768.8	-0.415159	0.0135649
LINC01234	437.407	-0.417055	0.0144076
CORO7	454.352	-0.417966	0.0471891
TFPT	1099.52	-0.418306	0.0306776
NUDT14	692.596	-0.423663	0.0332348
ZKSCAN7	396.017	-0.424813	0.0385636
ZNF219	899.689	-0.425624	0.0151698
AC010442.1	720.723	-0.427681	0.00258143
CAPN10-DT	307.623	-0.429796	0.0481387
BRI3	3521.08	-0.430627	0.033037
HMGA2	5164.38	-0.431389	0.0477101
SYNGR2	1829.5	-0.431597	0.0108456
NMT1	6026.45	-0.433059	0.0253919
CMBL	2580.31	-0.433411	0.049796
IL10RB	1854.42	-0.433764	0.00979424
TLCD1	494.985	-0.436523	0.0429528
HPSE	457.303	-0.440533	0.0162554
PPP1R3B	1558.68	-0.440574	1.0267e-07
ELFN1	408.29	-0.441131	0.0330433
ACYP2	296.883	-0.445	0.0419764
RAMP2	1068.84	-0.44873	0.0360609
AS3MT	520.853	-0.450797	0.03881
MAMDC2	4343.62	-0.45253	0.0151556
MAGEA1	1398.26	-0.455708	0.000250261
AC027031.2	487.059	-0.456832	0.00252278
MR1	1383.35	-0.45823	0.0274846
HMOX1	1720.38	-0.461972	0.0318523
MEIS3P1	287.183	-0.462487	0.0429161
FAM49A	399.053	-0.46648	0.0235099
CLIP3	2375.24	-0.467941	0.00979424
FEZ1	659.636	-0.468395	0.0445349
AC016065.1	209.002	-0.47055	0.0359899
EHD3	6392.77	-0.47193	0.0251784
GNG7	471.433	-0.476774	0.0190453
HAGHL	852.867	-0.478495	0.0402195
SCAPER	932.752	-0.482142	0.0288443
XAGE3	258.237	-0.48249	0.0384238
AL391244.2	314.983	-0.485193	0.0295361
AC245297.1	206.131	-0.485711	0.0303135
ZNF524	171.997	-0.487869	0.0451708
FTH1	76509.7	-0.492267	0.00258143
SLC27A5	255.692	-0.492646	0.0220611
GPX7	858.594	-0.494491	0.0174494
MAGEA11	992.835	-0.495316	3.55081e-07
CPVL	3426.44	-0.495936	0.00575347
NA	202.78	-0.496464	0.0227545
AL050341.2	228.805	-0.496886	0.0453304
ANKRD34A	275.004	-0.499662	0.00512066
SYT7	257.257	-0.509164	0.0246059
SEL1L3	3269.86	-0.509221	0.00510932
IFITM3	20144	-0.512699	0.0252412
PYCARD	961.575	-0.517207	0.00926915
CASP10	374.713	-0.520431	0.0282506
TSHZ2	2202.12	-0.522717	0.00445569
ZNF521	1676.55	-0.528333	0.00466489
NA	791.424	-0.528412	0.021892
PRKCB	1065.83	-0.529396	0.0440569
DUSP15	247.148	-0.529675	0.028447
COL9A3	4082.53	-0.530678	0.0187533
PLTP	6996.73	-0.531079	0.00600397
FTL	97215.4	-0.532884	0.00306517
ECSCR	314.089	-0.54514	0.0227284
AP006621.5	135.495	-0.54788	0.0377184
SLC7A8	1004.59	-0.548893	0.00721019
DYSF	2529.15	-0.548895	0.00423983
USP2	233.552	-0.550652	0.0318771
IFI30	2930.3	-0.554947	0.00827188
PRR7	203.971	-0.566697	0.01339
COCH	812.706	-0.572113	0.000171854
FAM133A	452.984	-0.577165	0.00187673
CD33	476.016	-0.594041	0.000778099
OLFML2A	2480.21	-0.594791	0.0384604
FBXO2	682.109	-0.596822	0.0327341
FXYD6	2385.94	-0.598702	0.00296494
SLC2A4	550.399	-0.59886	0.00826298
ITGA1	11661.1	-0.60587	8.04723e-05
ABHD8	415.065	-0.60593	0.0183349
COL8A2	659.701	-0.606844	0.0250888
OOEP	184.838	-0.611635	0.0171847
MIR4527HG	177.578	-0.614512	0.0108921
AC132872.1	143.639	-0.615191	0.0131473
AC021078.1	620.065	-0.628114	0.0100064
CLIC6	238.71	-0.630701	0.0372755
PDE6B	188.829	-0.631161	0.0332437
ID3	8443.25	-0.633546	0.0089186
IFIT2	1178.03	-0.645845	5.2615e-05
IFITM1	3198.92	-0.646881	0.0106511
LRRN2	226.485	-0.648227	0.049796
AC005253.1	114.595	-0.648448	0.0193236
ARHGAP9	264.066	-0.65179	0.0130134
TBXA2R	175.362	-0.65211	0.0347541
PPP1R16B	527.74	-0.65702	0.0306776
CAPG	110.56	-0.657598	0.0403964
NGFR	2528.29	-0.661734	0.0191969
ANO7	227.876	-0.665374	0.00124023
MS4A15	168.097	-0.668691	0.010509
FAM83H	345.193	-0.671561	0.000112551
COLEC11	893.969	-0.672328	0.00256013
CAMK1G	592.414	-0.673211	0.0377184
ZNF467	538.726	-0.676831	0.03059
ID1	4464.24	-0.678921	0.0353893
GPNMB	7636.76	-0.686855	0.00121186
SLC45A2	191.819	-0.691483	0.0325131
PTGER2	910.644	-0.691946	0.0038805
TPPP	427.996	-0.708054	0.00510932
CKM	89.283	-0.709907	0.014686
RARRES2	5285.6	-0.711876	0.000125669
GZMM	799.999	-0.711907	0.0260404
REEP1	645.671	-0.713377	0.0148864
AC020916.1	458.587	-0.723662	4.03624e-06
IFITM2	1317.63	-0.734171	0.0133979
HOXC12	131.337	-0.734638	0.00732255
LINC02557	375.782	-0.740556	0.00330113
DMTN	300.392	-0.759426	0.00982607
VAMP8	385.887	-0.773952	0.0212464
SHE	294.936	-0.778444	0.0010185
PDGFRL	578.621	-0.778819	0.00296494
TM7SF2	2521.28	-0.779489	0.00605115
WFDC1	322.596	-0.782763	5.99732e-07
ST6GAL1	1260.2	-0.787649	0.000165207
GREB1	310.331	-0.79038	0.0151057
NA	224.218	-0.805959	0.0104945
RPL4P5	84.9282	-0.807145	0.034081
GAB3	903.945	-0.808917	0.000411672
ELMO1	314.133	-0.809936	0.00698982
TRBV20-1	248.893	-0.810056	8.2443e-05
LINC01311	79.308	-0.814911	0.0174494
TMEM119	206.175	-0.815905	0.0140216
SYPL2	83.1613	-0.817744	0.049581
SDR42E1	246.939	-0.822167	0.00759393
KCNIP1	288.877	-0.831401	0.00759393
TDRD10	80.8034	-0.839101	0.0193224
AC008622.2	52.9246	-0.839816	0.0475895
ENPP2	849.77	-0.845069	0.00623683
SOX17	62.4076	-0.857482	0.0195664
AC132192.2	139.106	-0.870749	0.00237996
FPR2	56.2776	-0.872824	0.0466934
MAFB	2006.01	-0.881083	0.000114533
RGS4	778.123	-0.887522	0.0356925
AARD	73.1866	-0.890728	0.00520882
AC023509.1	209.04	-0.892321	0.000107773
CD79B	132.19	-0.901986	0.00260674
MRVI1	377.071	-0.903494	0.00164613
PCSK9	829.742	-0.907833	8.36313e-05
SLC7A10	92.3143	-0.924545	0.00922775
CNTFR	700.635	-0.925224	0.00062545
RTN4RL1	146.932	-0.929059	0.000658528
SPACA6P-AS	74.784	-0.931242	0.00603203
BAIAP2L2	100.968	-0.957159	0.0174363
IL4I1	44.4249	-0.958396	0.0324507
CFP	142.794	-0.960071	0.00540465
CHAD	59.0511	-0.964931	0.0403964
TRAF3IP3	99.9631	-0.966518	0.0011339
AC018892.3	49.7943	-0.976541	0.0466934
JPH4	834.659	-0.983125	0.00258143
MAT1A	731.653	-0.992805	0.00474953
RENBP	435.678	-0.994015	0.000868543
RRAGD	701.868	-0.996336	1.10601e-05
AL139089.1	33.4073	-1.00414	0.0288297
FCRLA	42.3397	-1.00674	0.0170628
APOC1	1307.21	-1.02242	2.32931e-09
SLC6A12	262.089	-1.04334	0.022993
TMEM255A	638.275	-1.06344	1.99685e-07
AC009086.2	455.056	-1.06534	0.0417434
AC018755.2	97.9463	-1.11497	0.0392454
AC006277.1	45.8997	-1.12974	0.00602677
CAPN6	166.405	-1.15694	0.000219826
RPLP0P2	306.694	-1.16899	4.25225e-05
RASAL3	65.5795	-1.17363	0.00179378
KDR	808.089	-1.18112	0.000356892
CYSLTR2	151.071	-1.18261	0.00154165
AC048341.2	122.454	-1.19618	0.000547853
SMPDL3B	107.508	-1.19671	0.0282986
LYPD9P	50.7902	-1.21828	0.0117128
SSX6P	45.487	-1.25302	0.0144076
CRYZL2P-SEC16B	94.8065	-1.27989	0.0414535
NA	39.8803	-1.28315	0.00887973
ZNF252P-AS1	45.8885	-1.28942	0.00090419
APOE	6958.01	-1.29205	4.27122e-09
AL121944.1	25.2207	-1.30469	0.0142981
HTR2B	48.4278	-1.30946	1.70295e-05
LPL	5043.22	-1.39862	1.07218e-22
C1orf115	406.058	-1.43048	0.000512776
RNA5-8SN2	684.303	-1.44251	1.53146e-05
PGAM2	238.125	-1.53091	4.53984e-06
FABP6	25.5201	-1.60644	0.0100632
NOS1	28.2098	-1.68789	0.00687722
SLC9A3	209.205	-1.73087	1.14109e-12
RNA5S1	26.7955	-1.81163	0.0117419
AC079298.3	24.942	-1.89831	0.0313456
CYP4F8	24.3395	-2.0733	0.00513661
UNC5CL	15.0778	-2.09818	0.0426214
MS4A6E	21.635	-2.11236	0.0409079
PSG6	42.7532	-2.65823	0.0389195
AMIGO3	93.0926	-3.84999	0.0434034
FPGT-TNNI3K	29.6309	-5.73212	2.7141e-06
