# Supplementary material for: TAZ-CAMTA1 and YAP-TFE3 alter the TAZ/YAP transcriptome by recruiting the ATAC histone acetyltransferase complex
Source: eLife journal article supplement (doi:10.7554/elife.62857), 2021-04-29
Supplement: supp [file elife_poa_e62857_Figure_6_figure_supplement_1.pdf › elife_poa_e62857_Figure_6_figure_supplement_1.pdf]

Figure S9

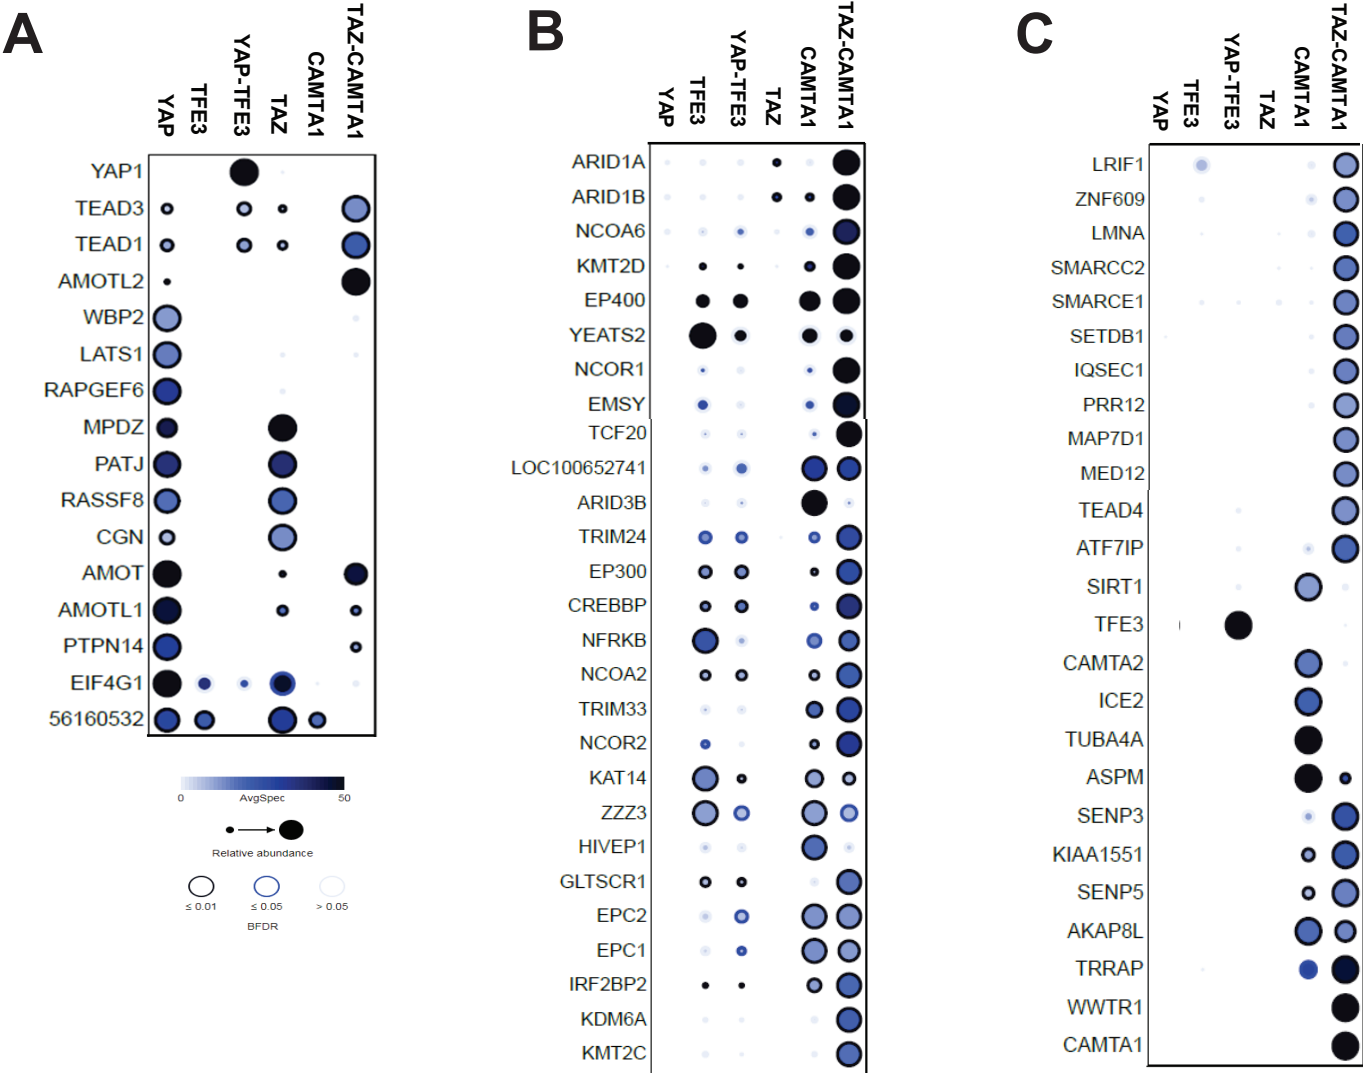

**D**

| Peptide sequence   | YAP #1 | YAP #2 | YAP-TFE3 #1 | YAP-TFE3 #2 |
|--------------------|--------|--------|-------------|-------------|
| TANVPQTVPMR        | 31     | 39     | 28          | 37          |
| LPDSFFKPPPEPK      | 6      | 6      | 5           | 6           |
| KLPSFFKPPPEPK      | 13     | 20     | 9           | 20          |
| GDSETDLEALFNAVMNPK | 8      | 14     | 16          | 21          |
| Sum all peptides   | 58     | 79     | 58          | 84          |

**E**

| Peptide sequence             | TAZ #1 | TAZ #2 | TAZ-CAMTA1 #1 | TAZ-CAMTA1 #2 |
|------------------------------|--------|--------|---------------|---------------|
| AMNQPLNHNMLHPAVSSTPVPQR      | 19     | 24     | 41            | 48            |
| KAMNQPLNHNMLHPAVSSTPVPQR     | 8      | 9      | 20            | 20            |
| KILPESFFK                    | 2      | 2      | 3             | 3             |
| KILPESFFKEPDGSGHSR           | 2      | 3      | 4             | 4             |
| LAGGAQHVR                    | 5      | 24     | 15            | 13            |
| ILPESFFK                     | 7      | 8      | 14            | 17            |
| ITTWQDPR                     | 2      | 4      | 8             | 8             |
| ILPESFFKEPDGSGHSR            | 7      | 6      | 7             | 8             |
| QQSYDVTDELPLPPGWEMTFTATGQR   | 1      | 9      | 18            | 41            |
| QSSTDSSGGHPGPR               | 4      | 21     | 4             | 16            |
| SHSSPASLQLGTGAGAAGSPAQQHAHLR | 3      | 6      | 12            | 21            |
| YFLNHIEK                     | 7      | 6      | 11            | 12            |
| Sum all peptides             | 67     | 122    | 157           | 211           |
