# Supplementary figures and images for: TAZ-CAMTA1 and YAP-TFE3 alter the TAZ/YAP transcriptome by recruiting the ATAC histone acetyltransferase complex
Source: eLife journal article supplement (doi:10.7554/elife.62857), 2021-04-29

Figure S1

A

NIH 3T3

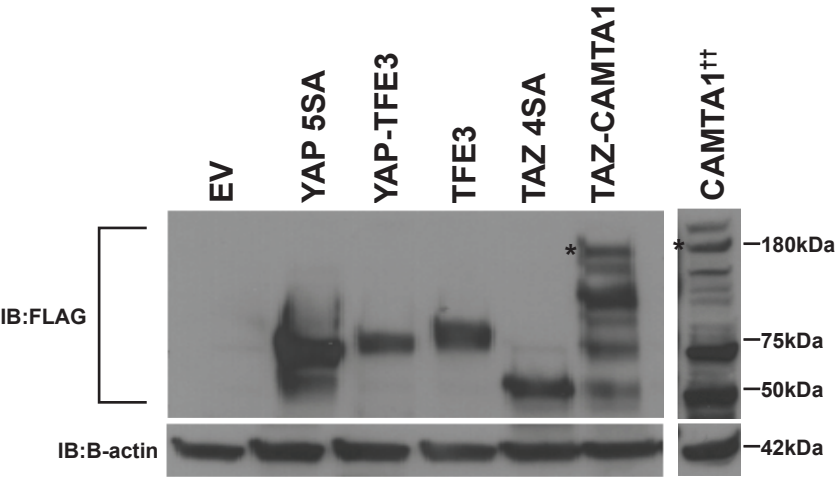

B

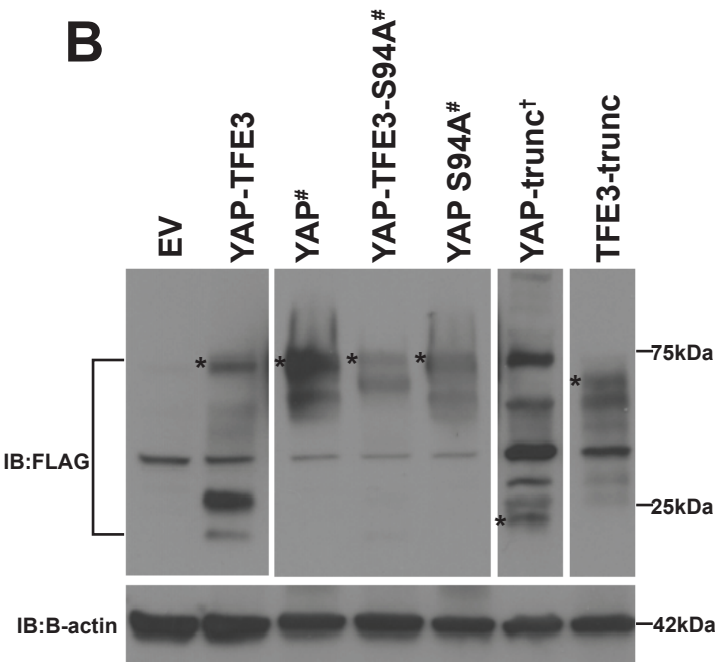

C

SW872

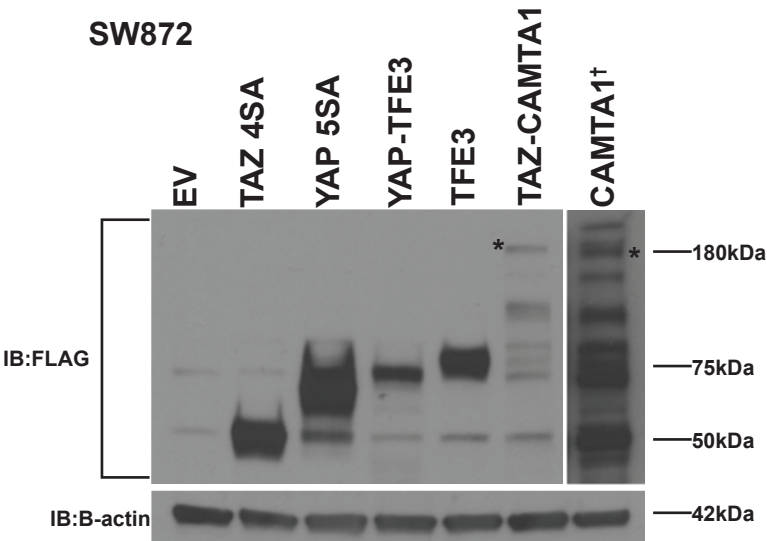

D

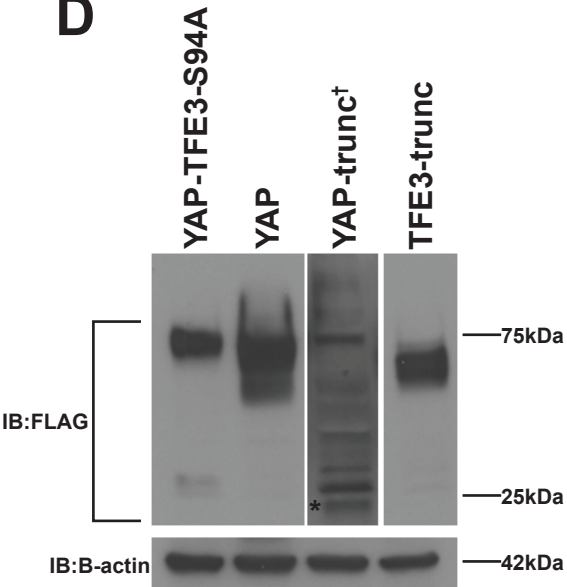

E

HEK 293

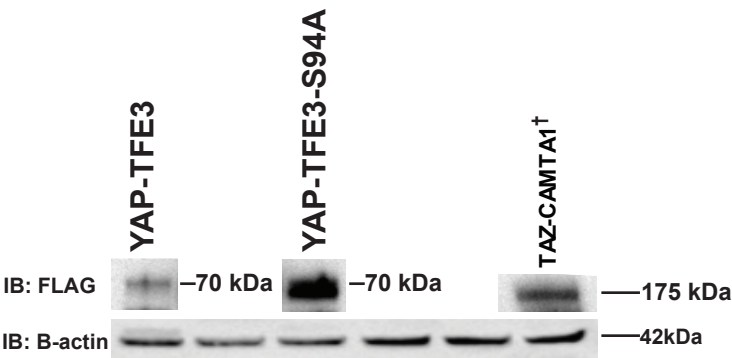

Supplement: supp [file elife_poa_e62857_Figure_1_figure_supplement_1.pdf › elife_poa_e62857_Figure_1_figure_supplement_1.pdf]

Figure S2

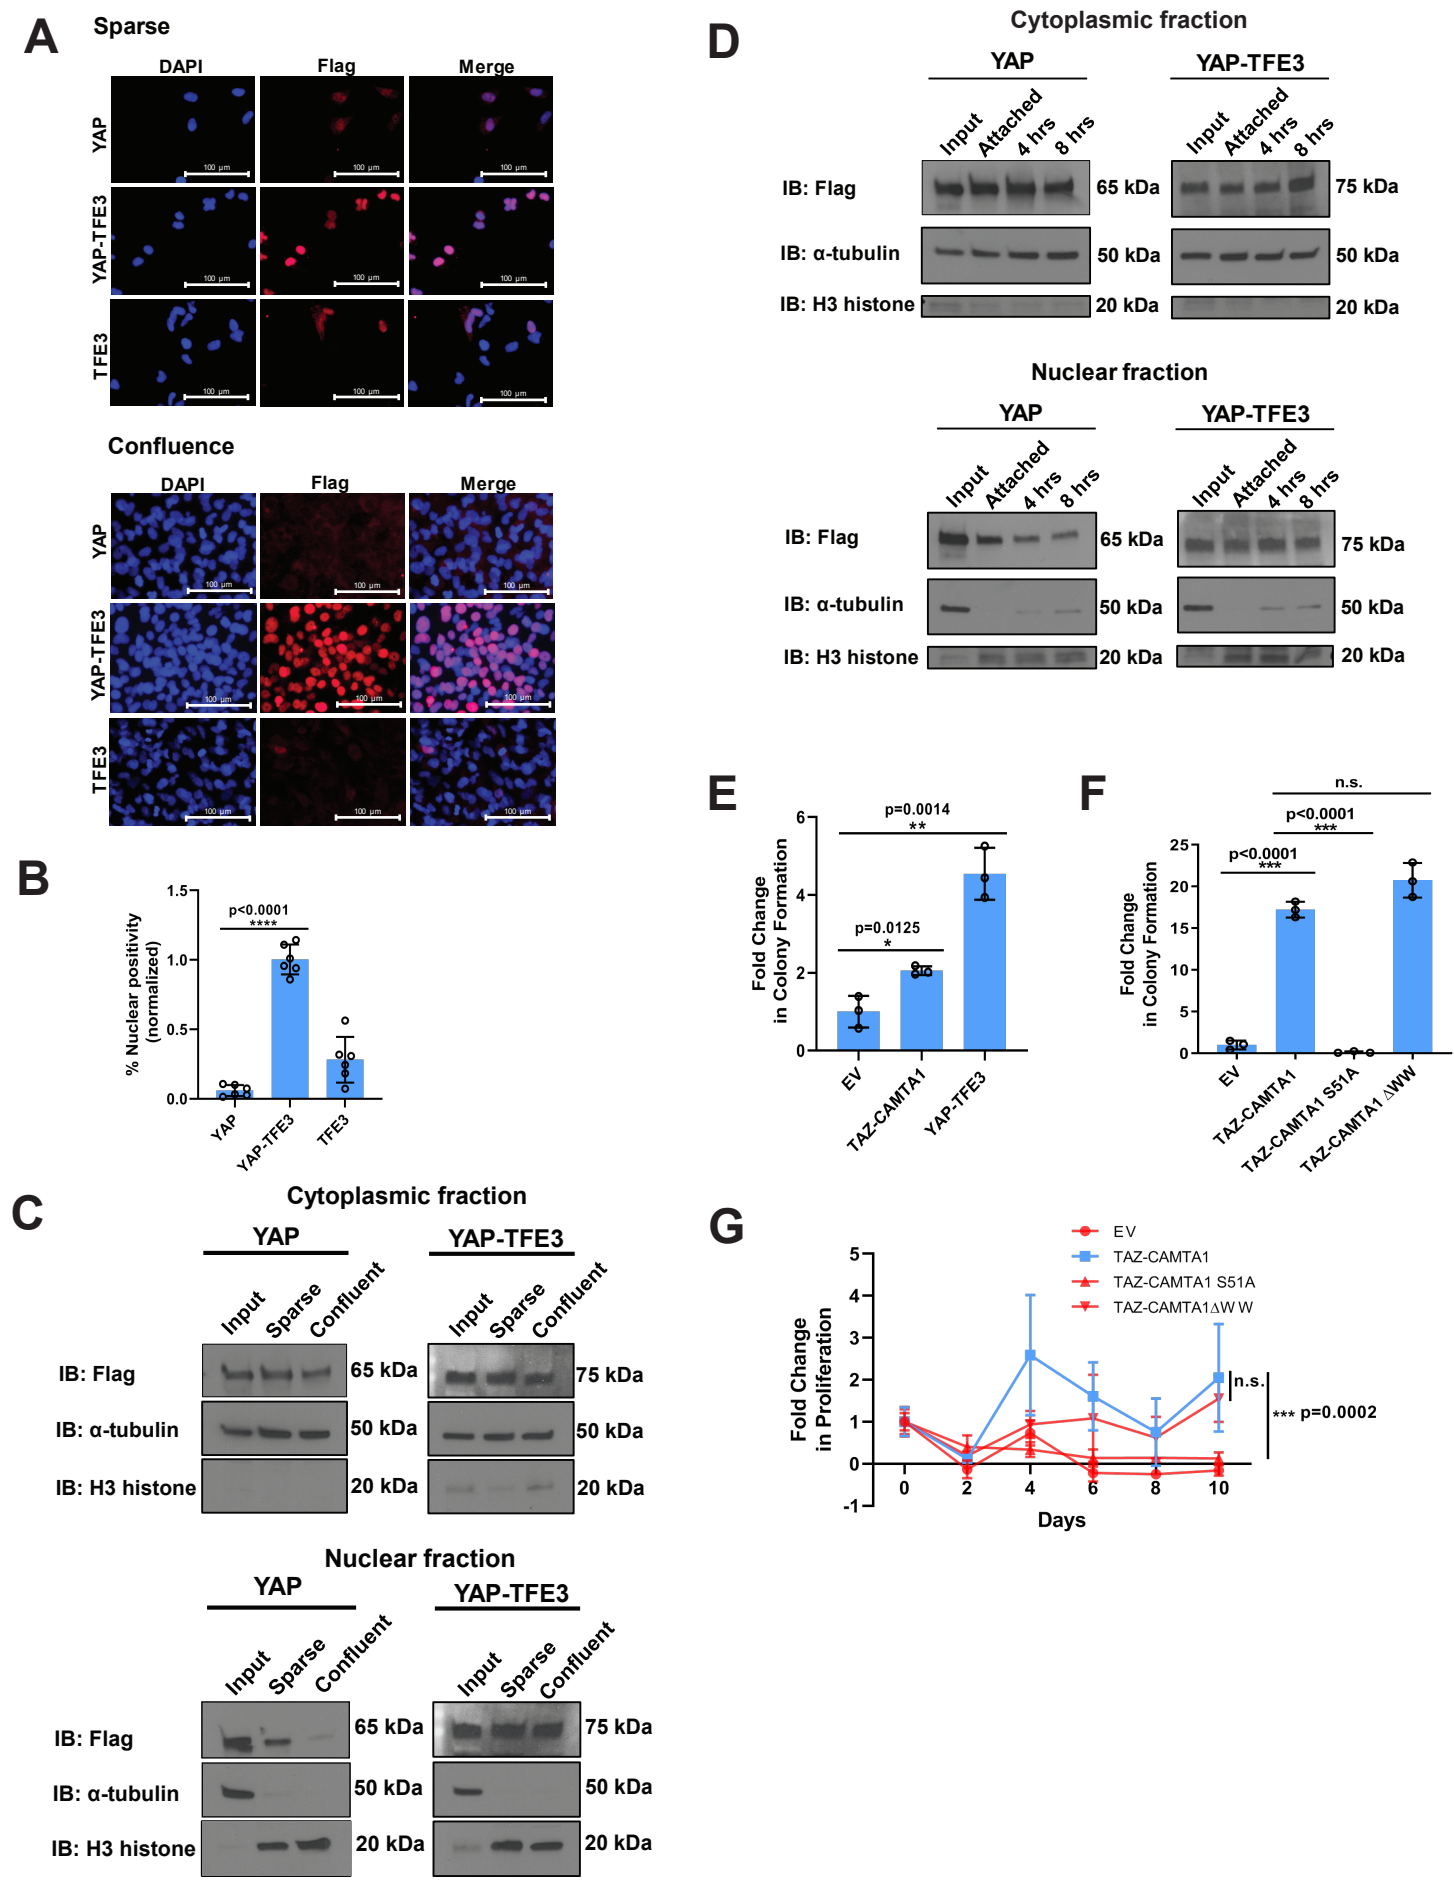

Supplement: supp [file elife_poa_e62857_Figure_1_figure_supplement_2.pdf › elife_poa_e62857_Figure_1_figure_supplement_2.pdf]

# Figure S3

## A NIH 3T3 cells

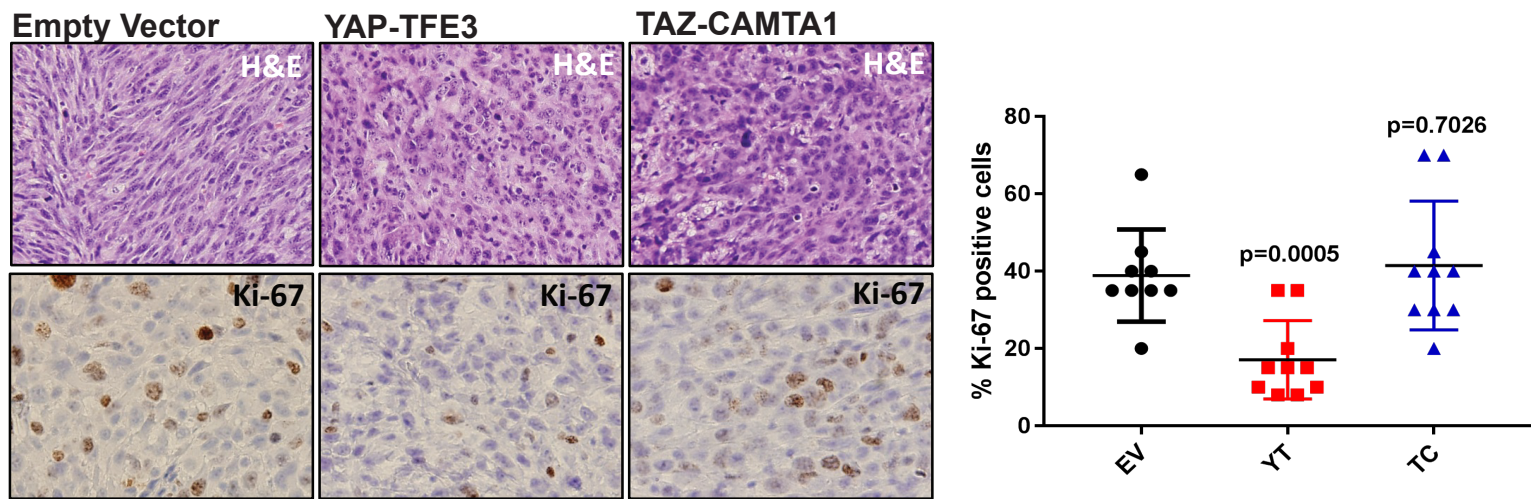

## B SW 872 cells

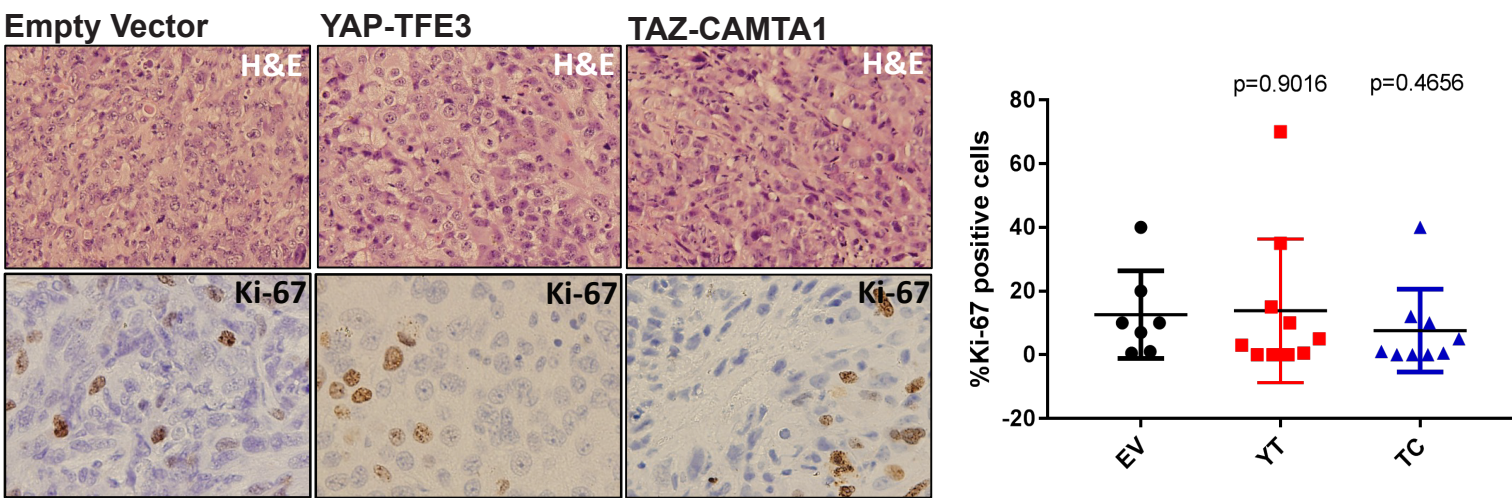

Supplement: supp [file elife_poa_e62857_Figure_1_figure_supplement_3.pdf › elife_poa_e62857_Figure_1_figure_supplement_3.pdf]

# Figure S4

## A RNA-Seq - SW872 cells

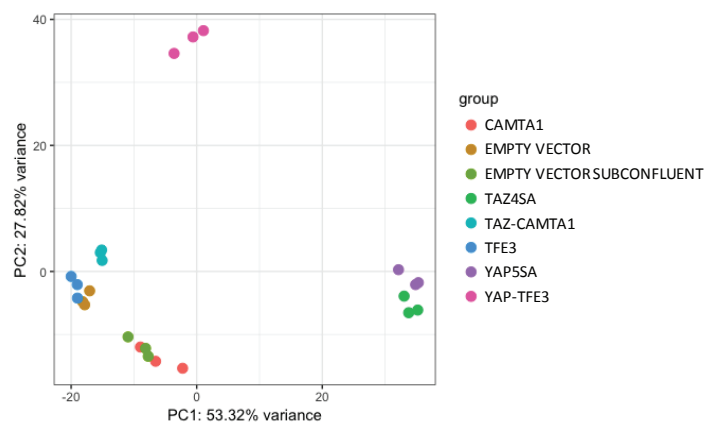

## B

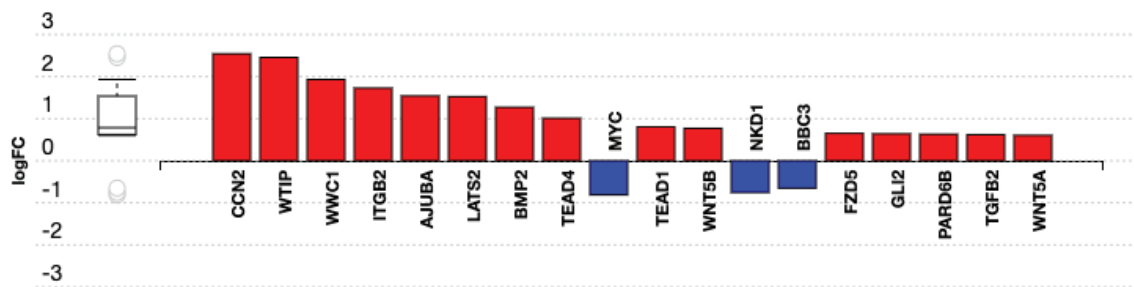

Supplement: supp [file elife_poa_e62857_Figure_3_figure_supplement_1.pdf › elife_poa_e62857_Figure_3_figure_supplement_1.pdf]

Figure S5

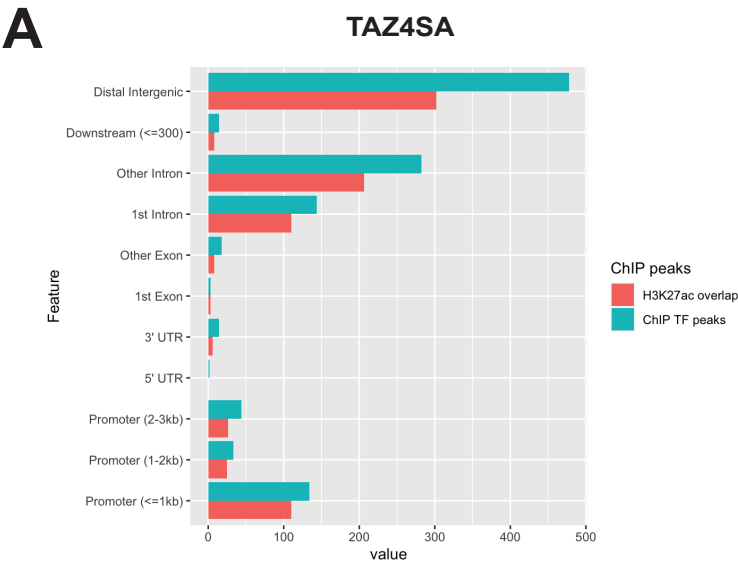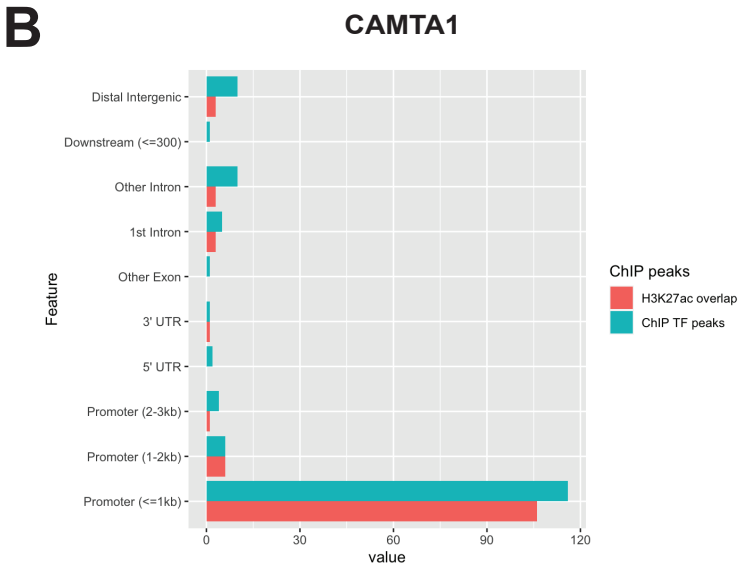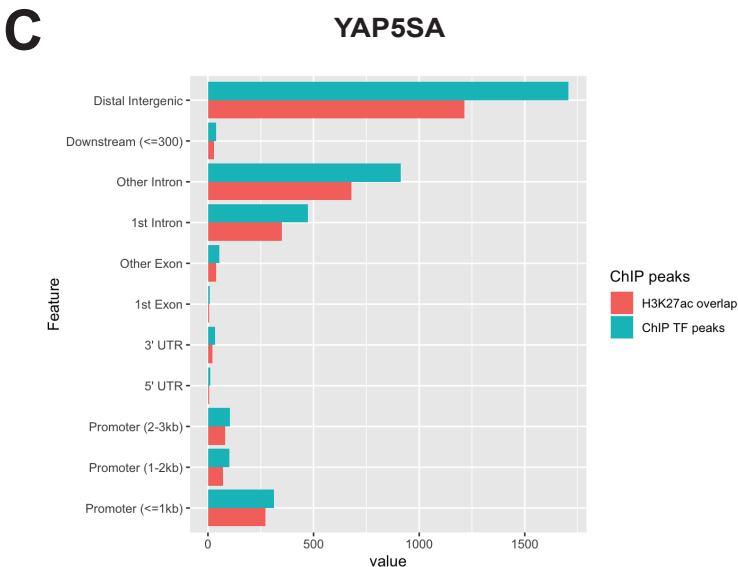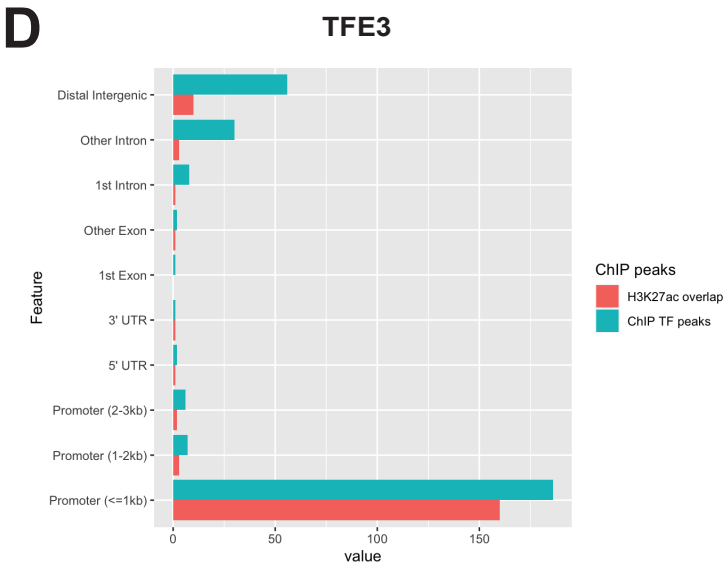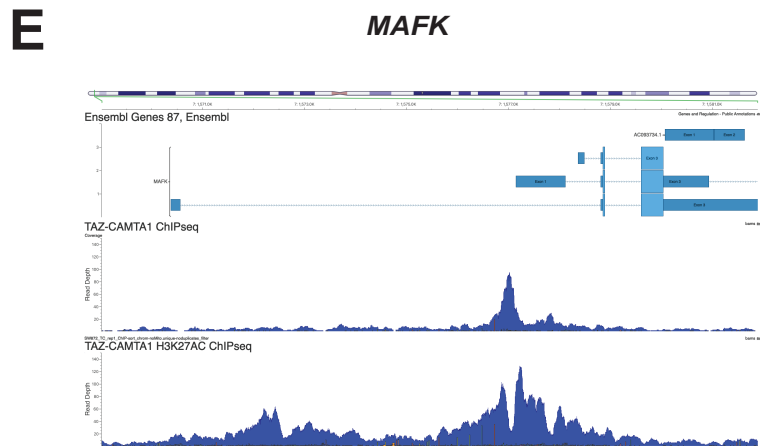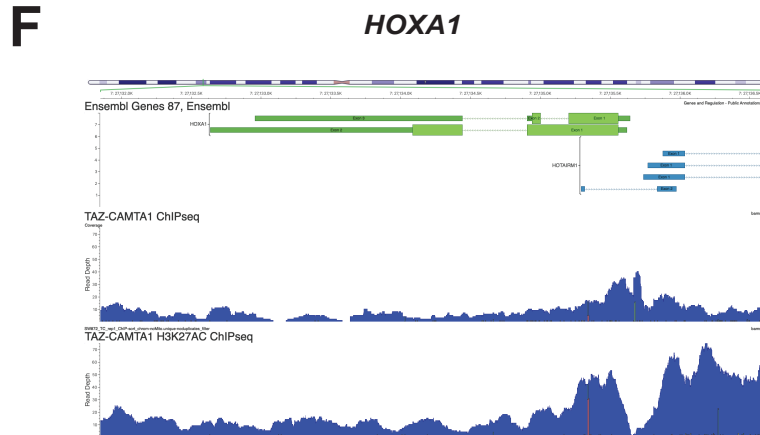

Supplement: supp [file elife_poa_e62857_Figure_4_figure_supplement_1.pdf › elife_poa_e62857_Figure_4_figure_supplement_1.pdf]

Figure S6

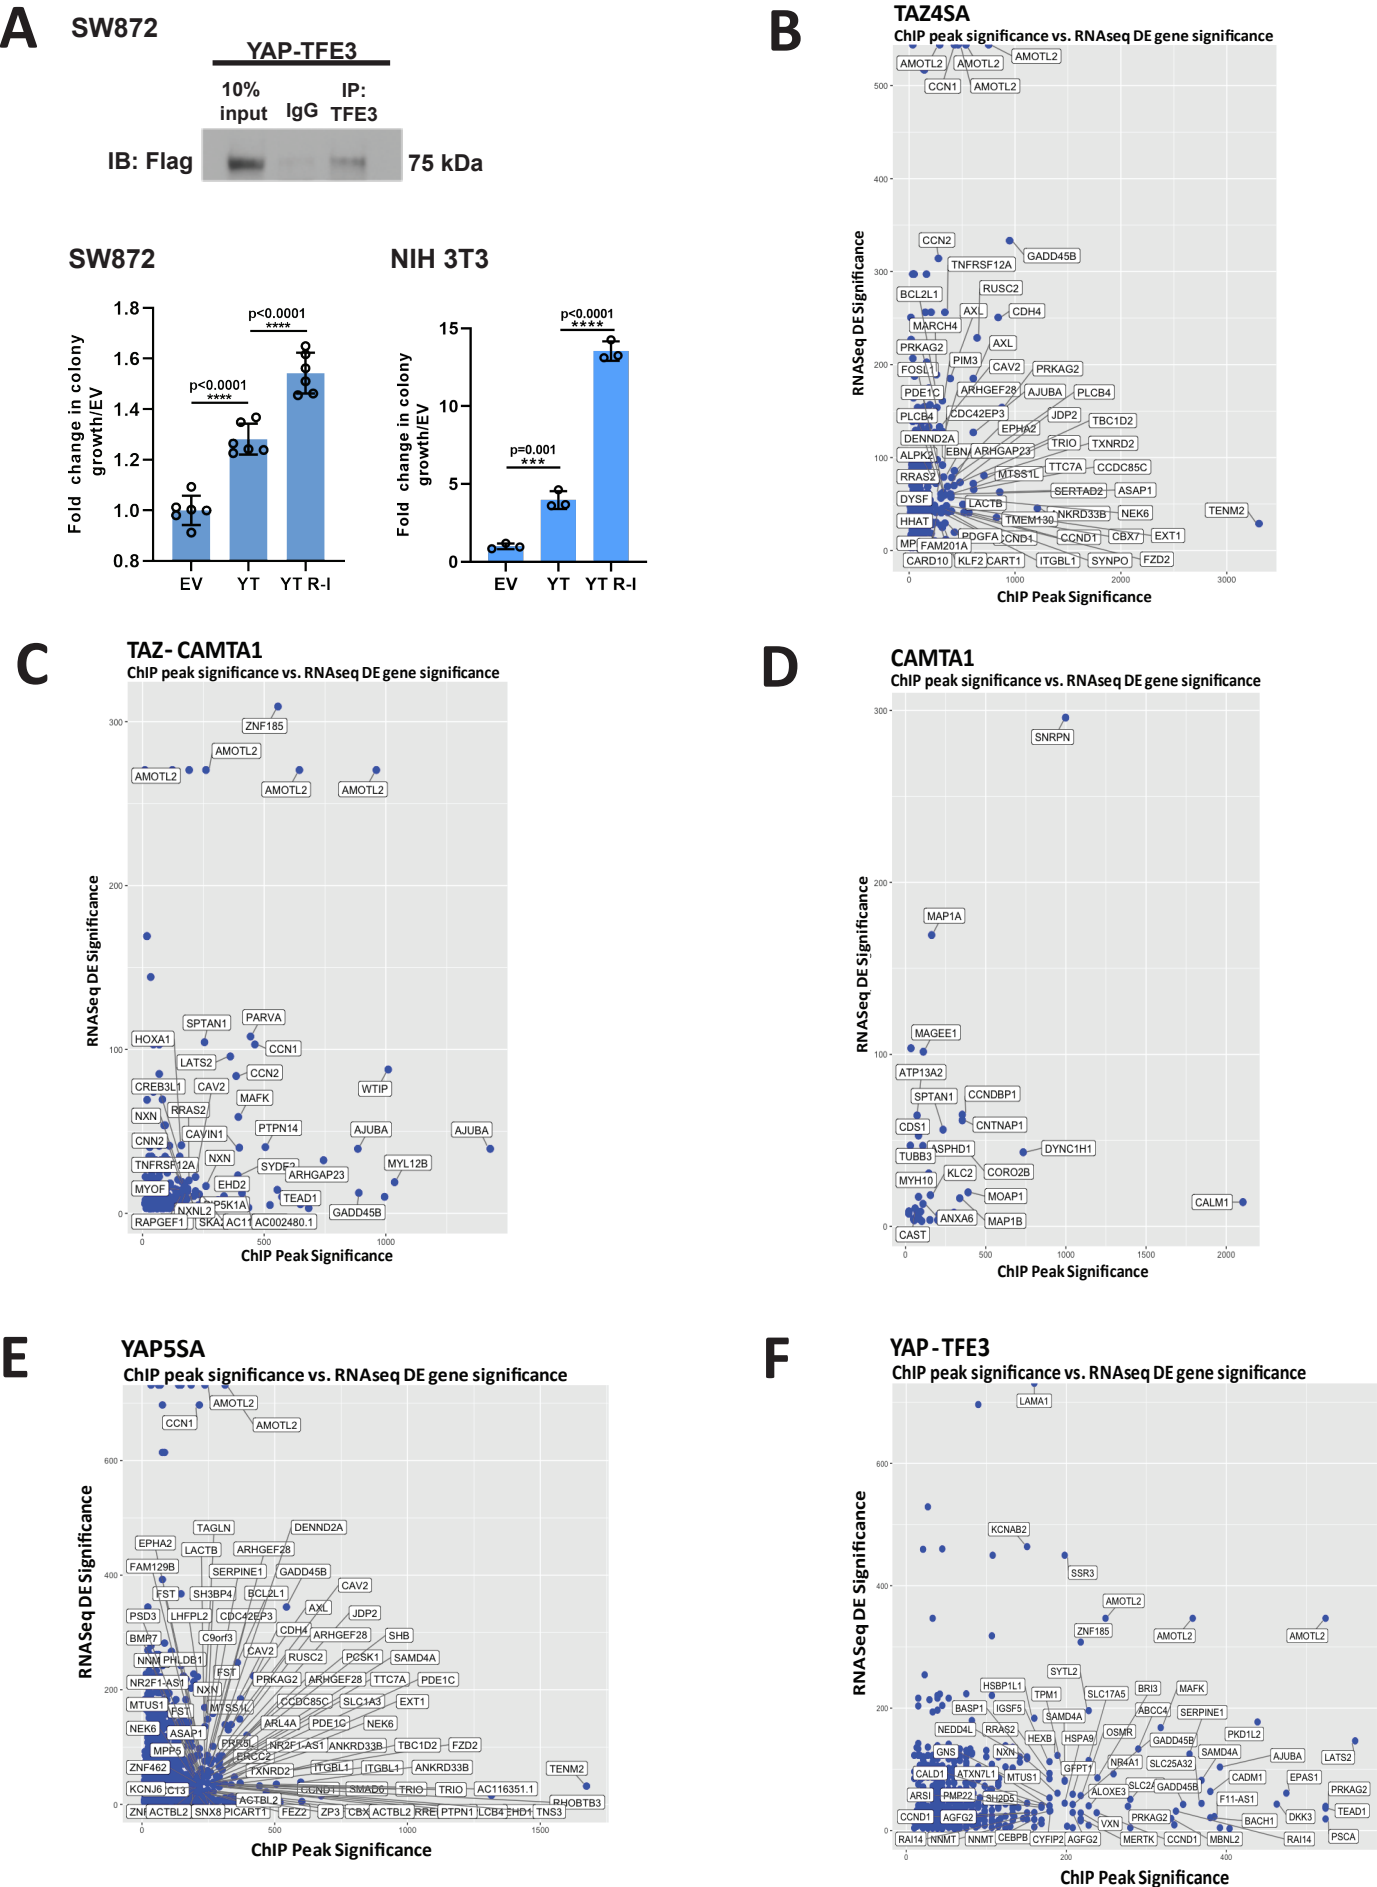

Supplement: supp [file elife_poa_e62857_Figure_4_figure_supplement_2.pdf › elife_poa_e62857_Figure_4_figure_supplement_2.pdf]

Figure S7

A TAZ-CAMTA1

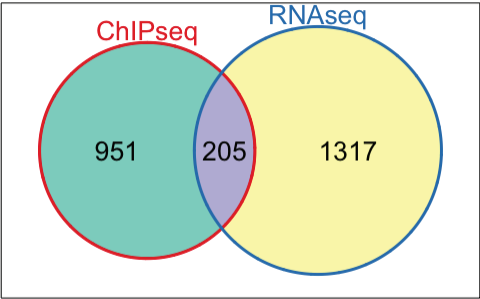

B YAP-TFE3

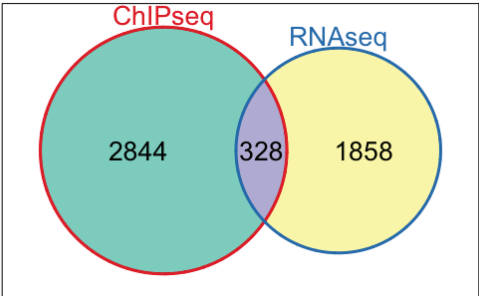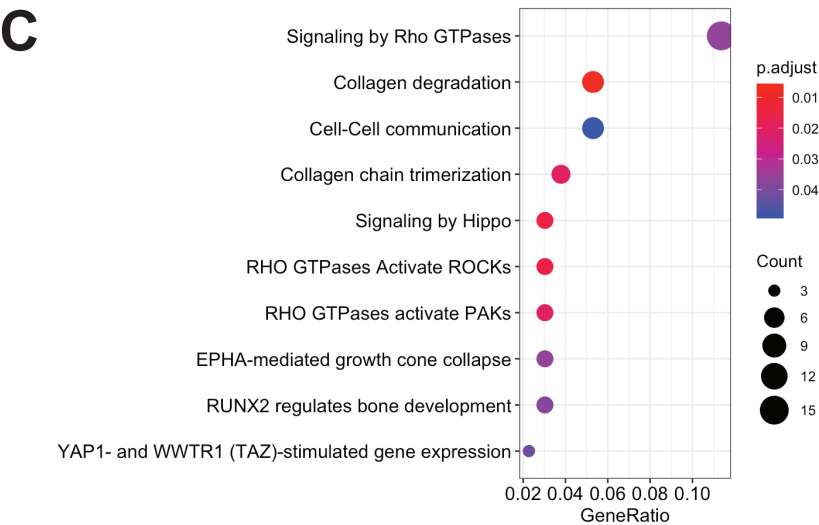

Supplement: supp [file elife_poa_e62857_Figure_4_figure_supplement_3.pdf › elife_poa_e62857_Figure_4_figure_supplement_3.pdf]

Figure S8

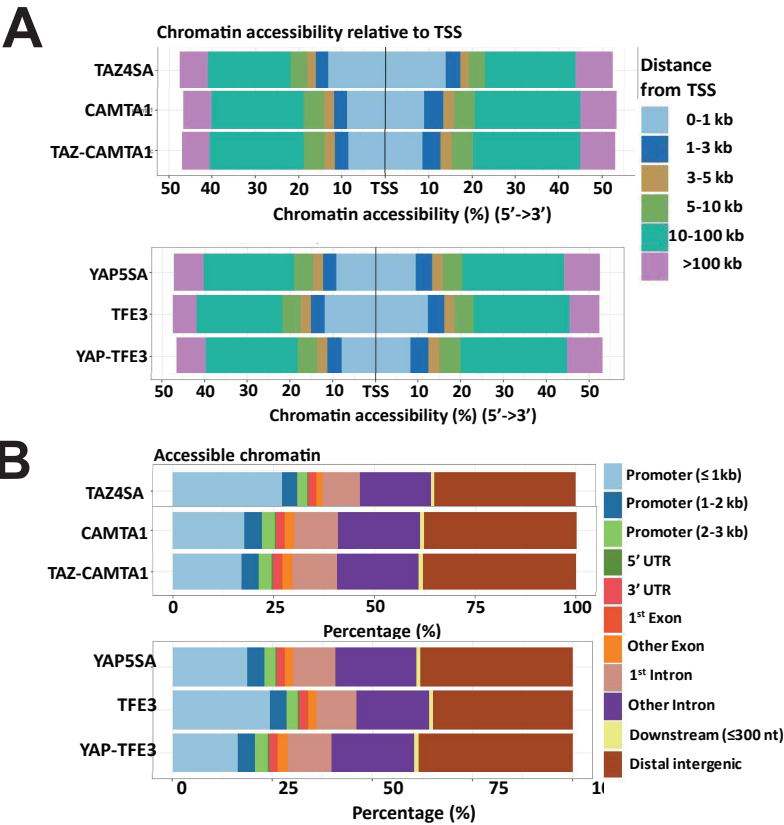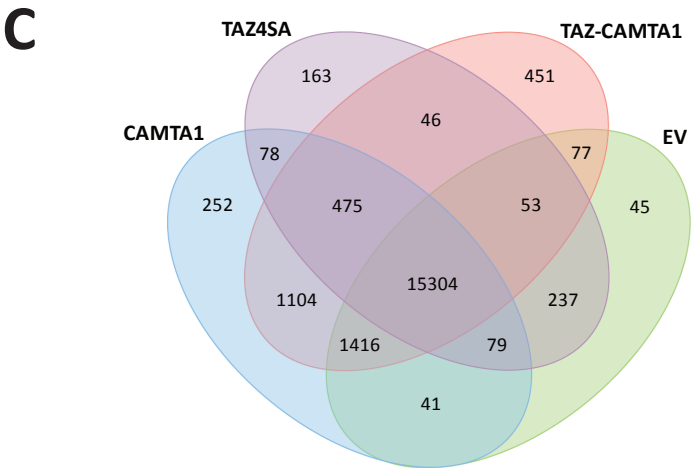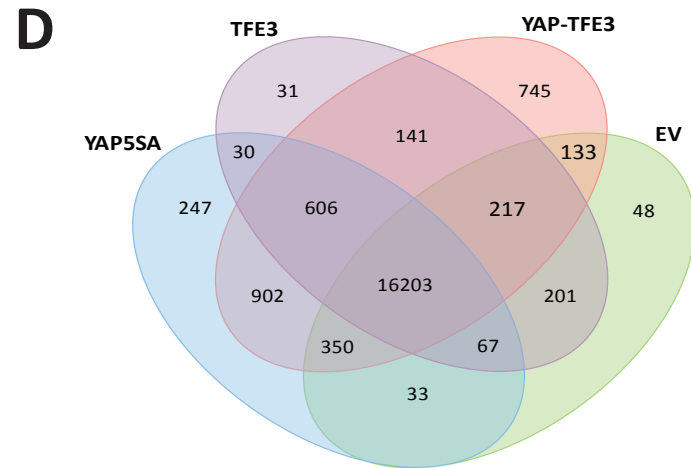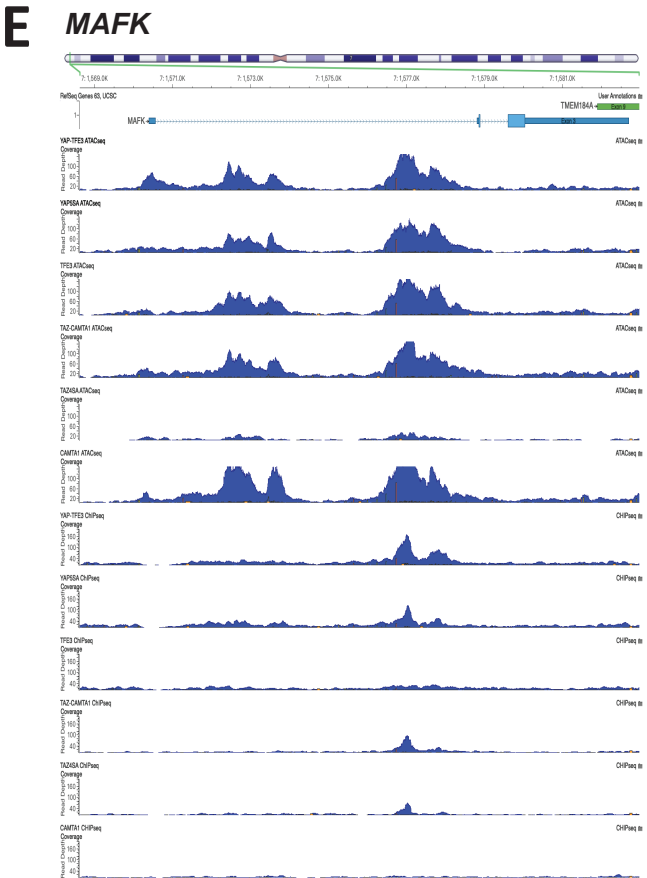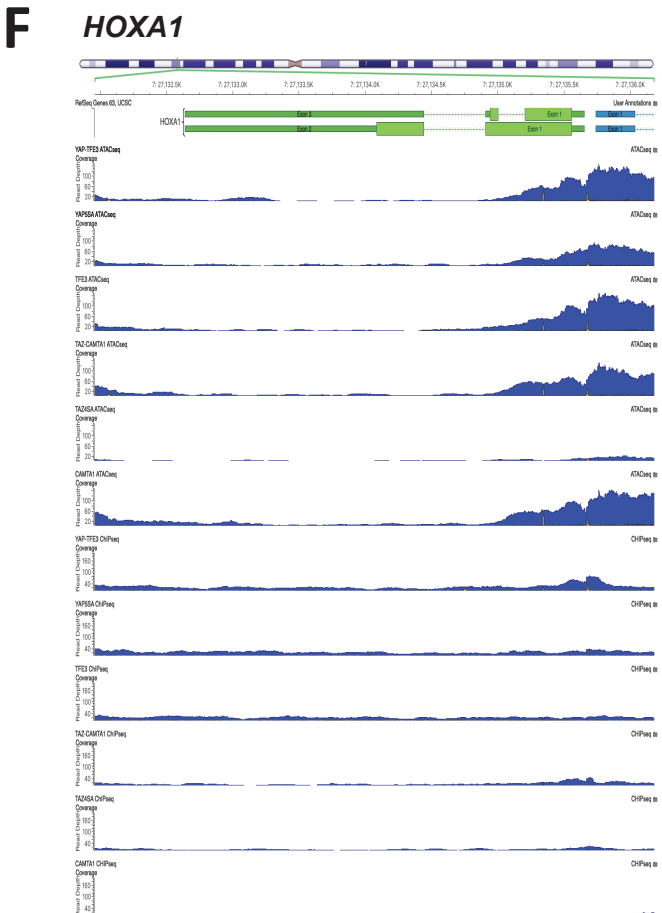

Supplement: supp [file elife_poa_e62857_Figure_5_figure_supplement_1.pdf › elife_poa_e62857_Figure_5_figure_supplement_1.pdf]

# Figure S10

**A**

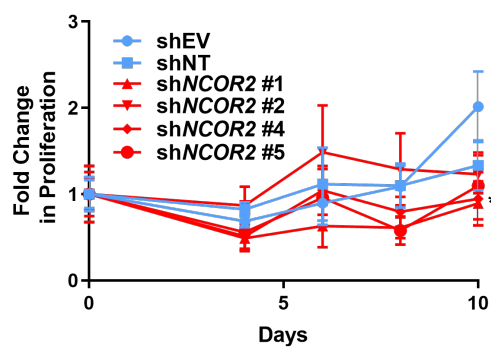

**B**

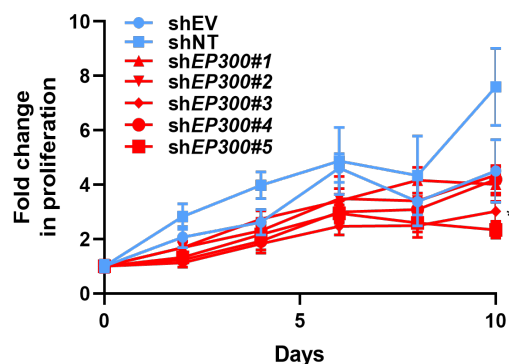

**C**

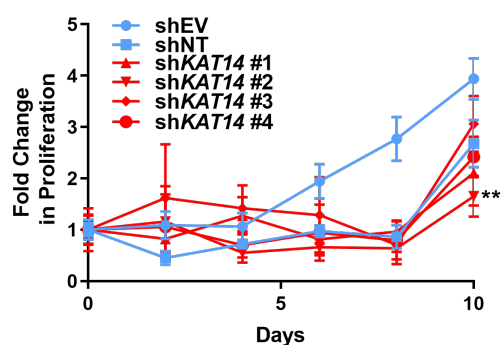

**D**

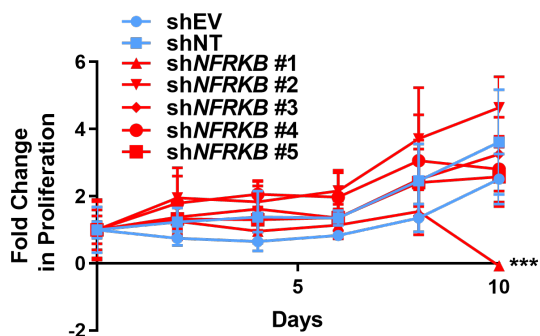

**E**

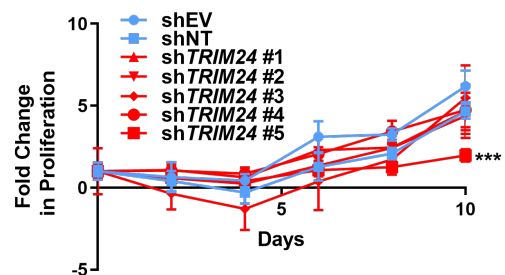

**F**

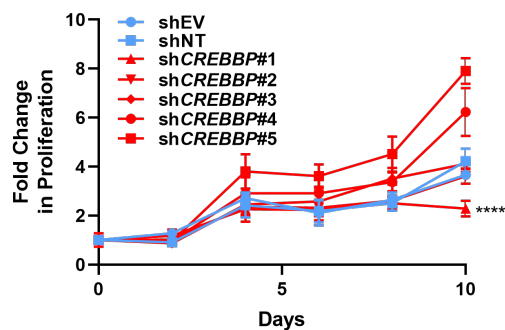

**G**

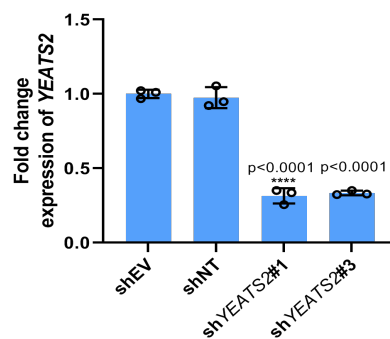

**H**

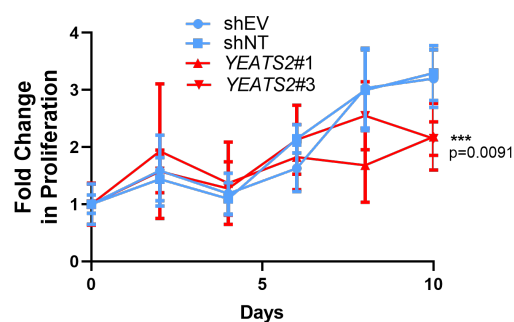

**I**

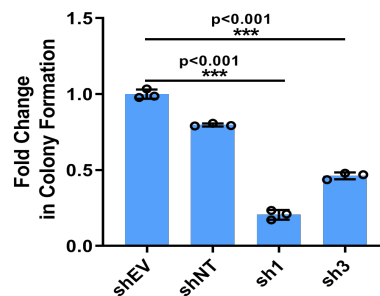

Supplement: supp [file elife_poa_e62857_Figure_7_figure_supplement_1.pdf › elife_poa_e62857_Figure_7_figure_supplement_1.pdf]

Figure S11

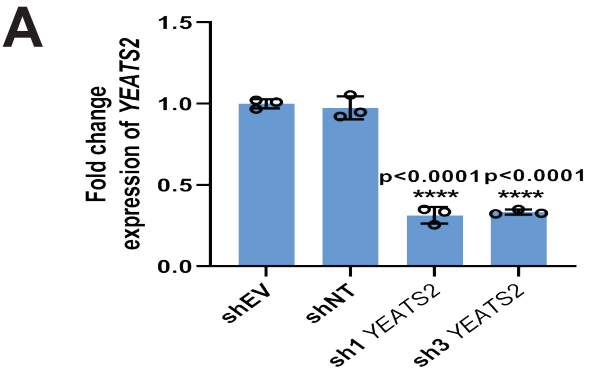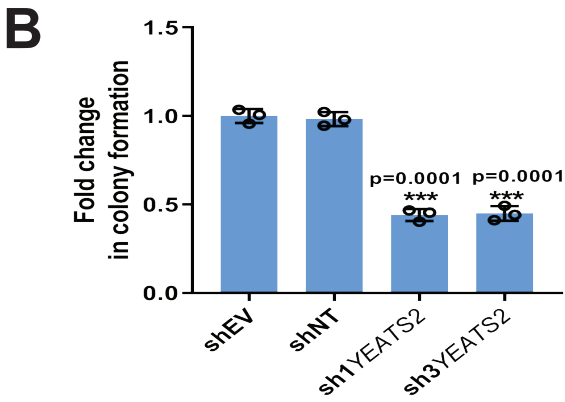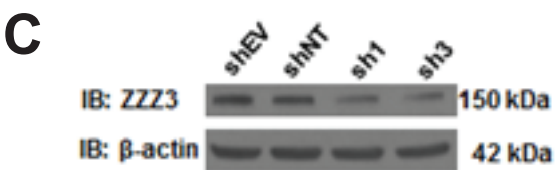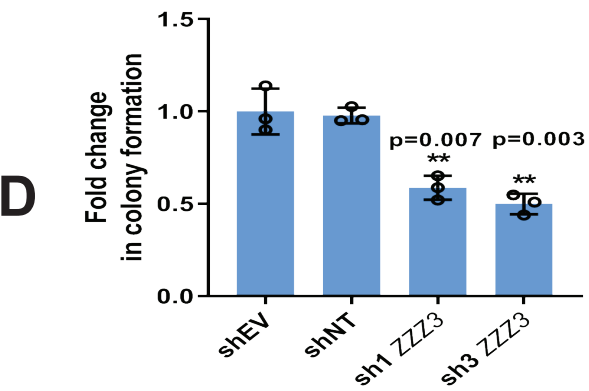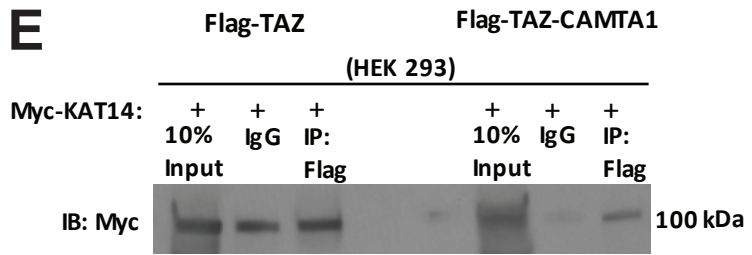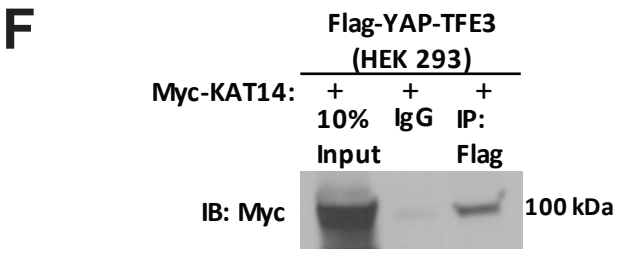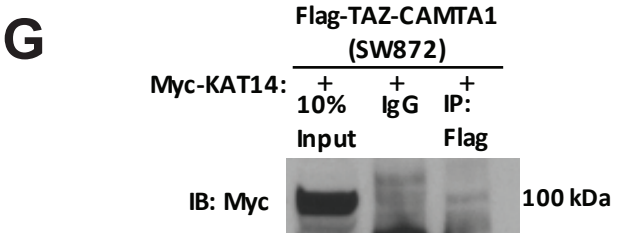

Supplement: supp [file elife_poa_e62857_Figure_8_figure_supplement_1.pdf › elife_poa_e62857_Figure_8_figure_supplement_1.pdf]

Figure S12

A

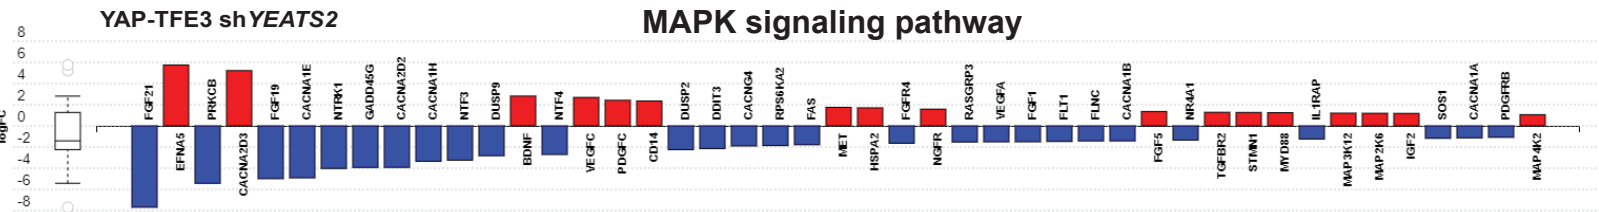

B

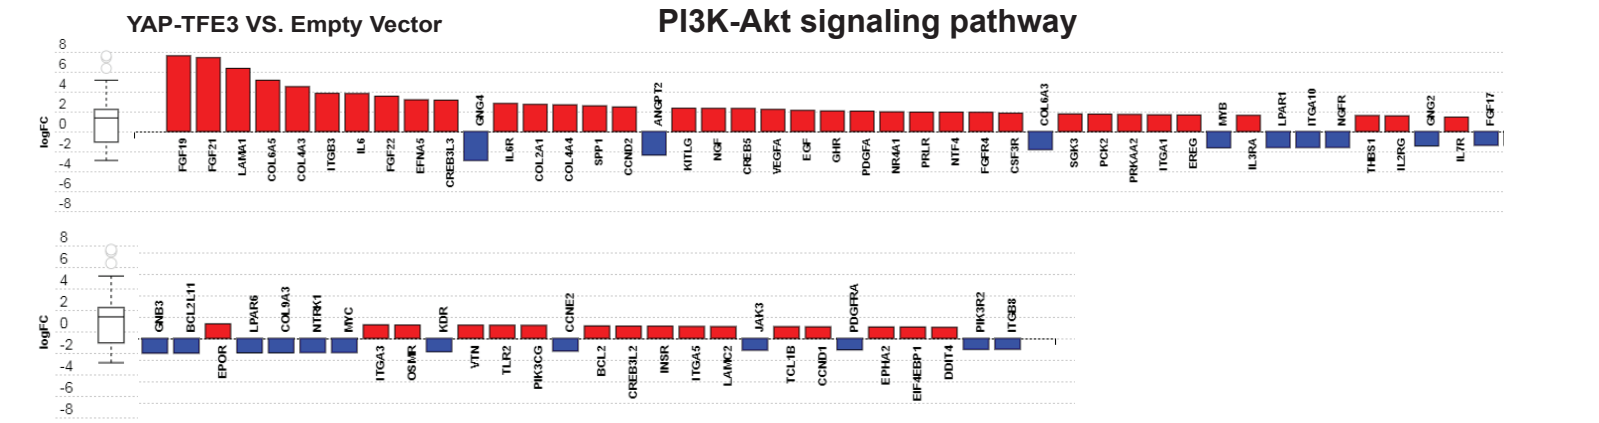

C

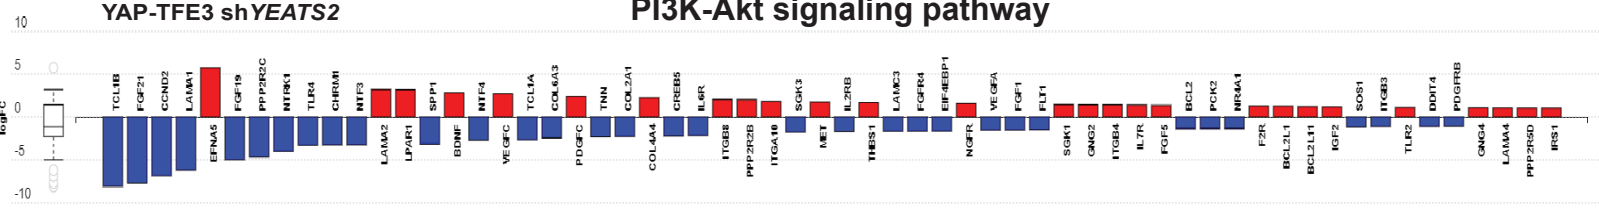

D

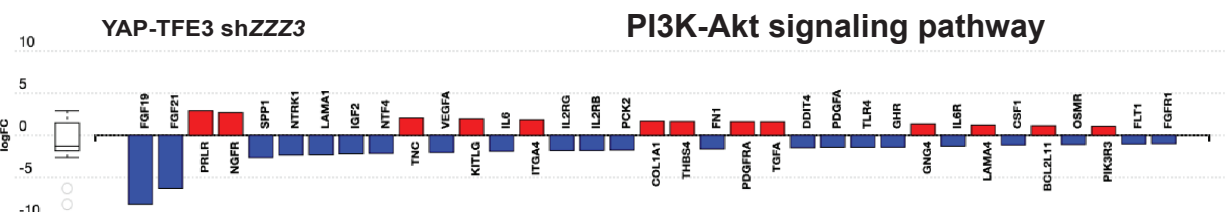

E

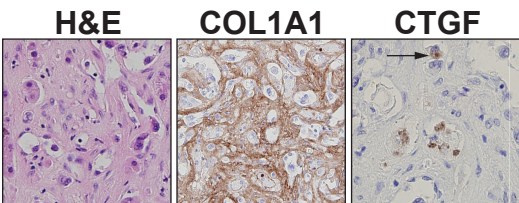

F

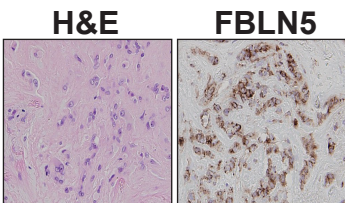

Supplement: supp [file elife_poa_e62857_Figure_8_figure_supplement_2.pdf › elife_poa_e62857_Figure_8_figure_supplement_2.pdf]
